# Supplementary material for: An angled-shape tip-based strategy for highly sensitive proteomic profiling of a low number of cells
Source: Royal Society of Chemistry journal article supplement (doi:10.1039/d2ay01884e), 2023-01-01
Supplement: d2ay01884e1.pdf [file d2ay01884e1.pdf]

## Supporting Information

### **An angled-shape tip-based strategy for highly sensitive proteomic profiling of a low number of cells**

Hongxian Zhao <sup>a</sup>, Yongle Chen <sup>a</sup>, Hang Li<sup>b, \*</sup>, Yangjun Zhang<sup>a</sup>, Wanjun

Zhang<sup>a</sup>, Weijie Qin<sup>a, \*</sup>

<sup>a</sup> National Center for Protein Sciences Beijing, State Key Laboratory of Proteomics, Beijing

Proteome Research Center, Beijing Institute of Lifeomics, Beijing 102206, PR China

<sup>b</sup> School of Medical Technology, Beijing Institute of Technology, Beijing 100081, PR China

\*Corresponding Author E-mail:

hang.li@bit.edu.cn (Li H.), and aunp\_dna@126.com (Qin W. J.)

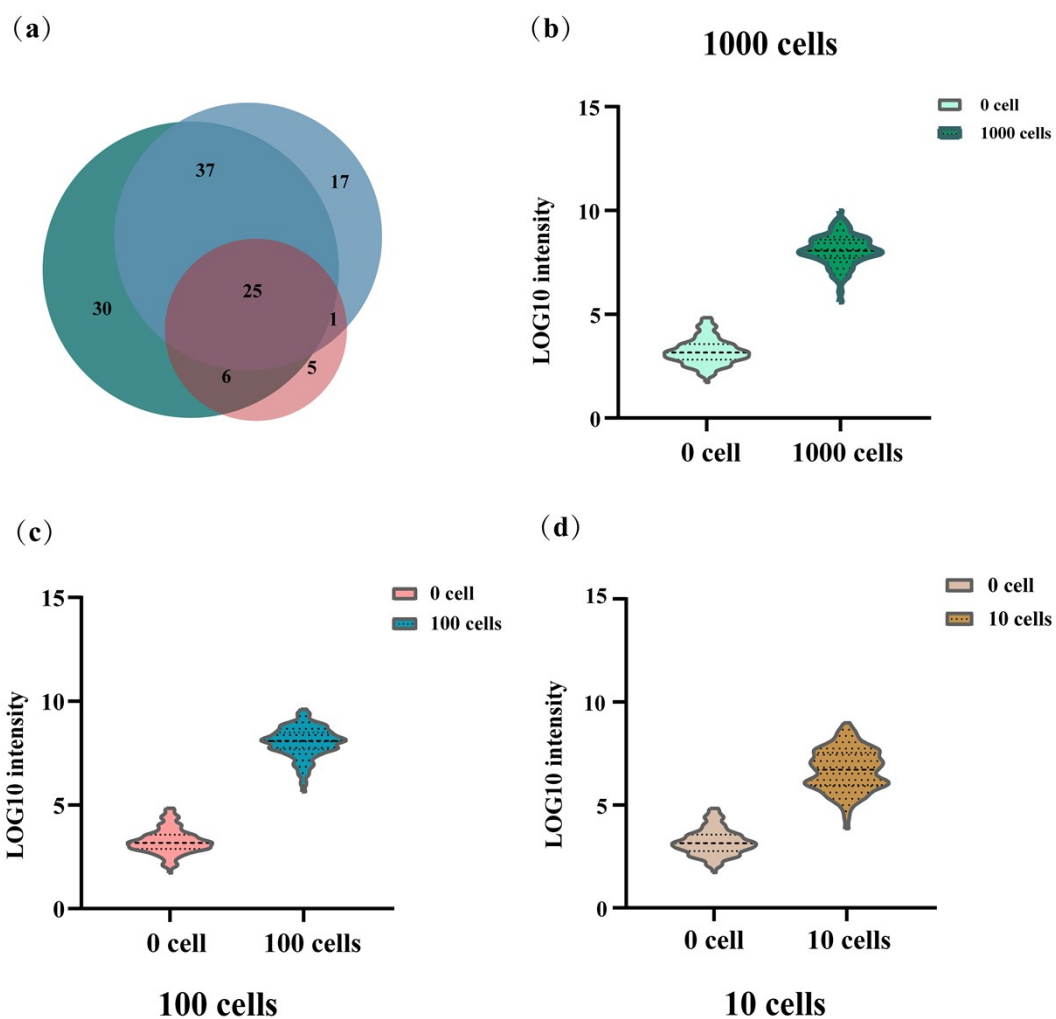

**Figure S1.** (a) Venn plot showing overlap of the identified proteins in blank triplicates. (b)-(d) Violin plot showing intensities of the proteins co-identified in blank and 1000 cells, 100 cells, and 10 cells using the BSA-treated angled shape tip approach.

| Method           | Time                                                                  |
|------------------|-----------------------------------------------------------------------|
| Angled-shape tip | ~4h 30min (lysis 20min, reduction and alkylation 10min, digestion 4h) |
| Commercial-kit   | ~5h (lysis, reduction and alkylation 30min, digestion 4h, desalting)  |

|     |                            |
|-----|----------------------------|
|     | 30min)                     |
| SP3 | >12h (digestion overnight) |

**Table S4.** The processing time of our proposed angled-shape tip compared with that of the commercial kit and SP3 approach.
