# Supplementary material for: An angled-shape tip-based strategy for highly sensitive proteomic profiling of a low number of cells
Source: Royal Society of Chemistry journal article supplement (doi:10.1039/d2ay01884e), 2023-01-01
Supplement: d2ay01884e2.xlsx [file d2ay01884e2.xlsx]

## Sheet: 1000cells-PG(ratio)
Accession	Coverage (%)	#Peptides	#Unique	PTM	Sample1	Sample2	Sample3	Sample4	Sample5	Sample6	Avg. Mass	Description
P60709	86	172	4	Carbamidomethylation; Oxidation (M); Acetylation (Protein N-term)	375540000	163200000	314350000	639850000	982000000	894000	41737	Actin cytoplasmic 1 OS=Homo sapiens OX=9606 GN=ACTB PE=1 SV=1
Q15149	50	226	217	Carbamidomethylation	75395000	265940000	878030000	1592900000	6130000000	578000000	531796	Plectin OS=Homo sapiens OX=9606 GN=PLEC PE=1 SV=3
Q09666	56	254	254	Carbamidomethylation; Acetylation (Protein N-term)	149440000	288920000	813920000	1271200000	5120000000	1020000000	629114	Neuroblast differentiation-associated protein AHNAK OS=Homo sapiens OX=9606 GN=AHNAK PE=1 SV=2
P14618	84	135	135	Carbamidomethylation; Oxidation (M); Acetylation (Protein N-term)	884110000	1176600000	3772000000	4961500000	11500000000	1290000000	57937	Pyruvate kinase PKM OS=Homo sapiens OX=9606 GN=PKM PE=1 SV=4
Q14204	44	154	154	Carbamidomethylation; Oxidation (M); Acetylation (Protein N-term)	52707000	100600000	319750000	492300000	1660000000	2020000000	532412	Cytoplasmic dynein 1 heavy chain 1 OS=Homo sapiens OX=9606 GN=DYNC1H1 PE=1 SV=5
P68032	50	87	9	Oxidation (M)	110460000	22862000	1662200000	2611900000	6430000000	425000000	42019	Actin alpha cardiac muscle 1 OS=Homo sapiens OX=9606 GN=ACTC1 PE=1 SV=1
P05787	86	104	88	Oxidation (M); Acetylation (Protein N-term)	316620000	366280000	877030000	1833700000	4480000000	305000000	53704	Keratin type II cytoskeletal 8 OS=Homo sapiens OX=9606 GN=KRT8 PE=1 SV=7
P08238	68	133	87	Carbamidomethylation; Oxidation (M)	314880000	417530000	1908300000	2330500000	7180000000	620000000	83264	Heat shock protein HSP 90-beta OS=Homo sapiens OX=9606 GN=HSP90AB1 PE=1 SV=4
P07437	78	104	22	Carbamidomethylation; Oxidation (M)	85266000	91689000	508340000	839760000	3630000000	238000000	49671	Tubulin beta chain OS=Homo sapiens OX=9606 GN=TUBB PE=1 SV=2
P68371	74	94	3	Carbamidomethylation; Oxidation (M)	2946500	16683000	38522000	62152000	280000000	16200000	49831	Tubulin beta-4B chain OS=Homo sapiens OX=9606 GN=TUBB4B PE=1 SV=1
P05783	87	75	72	Oxidation (M)	346510000	234860000	592110000	748360000	4550000000	352000000	48058	Keratin type I cytoskeletal 18 OS=Homo sapiens OX=9606 GN=KRT18 PE=1 SV=2
P46013	51	134	134	Carbamidomethylation; Oxidation (M)	74946000	143660000	371810000	422600000	295000000	104000000	358695	Proliferation marker protein Ki-67 OS=Homo sapiens OX=9606 GN=MKI67 PE=1 SV=2
Q00839	56	80	79	Carbamidomethylation; Oxidation (M)	158010000	291440000	662330000	956700000	2850000000	163000000	90585	Heterogeneous nuclear ribonucleoprotein U OS=Homo sapiens OX=9606 GN=HNRNPU PE=1 SV=6
P07900	63	93	53	Carbamidomethylation; Oxidation (M)	61436000	89195000	580730000	1011500000	5440000000	389000000	84660	Heat shock protein HSP 90-alpha OS=Homo sapiens OX=9606 GN=HSP90AA1 PE=1 SV=5
O75369	46	83	75	Carbamidomethylation; Oxidation (M)	46119000	129100000	289290000	480560000	959000000	177000000	278162	Filamin-B OS=Homo sapiens OX=9606 GN=FLNB PE=1 SV=2
P78527	36	130	130	Carbamidomethylation	35398000	98349000	346450000	655290000	1920000000	196000000	469093	DNA-dependent protein kinase catalytic subunit OS=Homo sapiens OX=9606 GN=PRKDC PE=1 SV=3
P02545	70	66	64	Carbamidomethylation; Oxidation (M)	112190000	282760000	471820000	807570000	6610000000	378000000	74140	Prelamin-A/C OS=Homo sapiens OX=9606 GN=LMNA PE=1 SV=1
P22626	94	83	76	Carbamidomethylation; Oxidation (M); Acetylation (Protein N-term)	161730000	201700000	788960000	1135500000	5020000000	391000000	37430	Heterogeneous nuclear ribonucleoproteins A2/B1 OS=Homo sapiens OX=9606 GN=HNRNPA2B1 PE=1 SV=2
P68104	77	127	91	Carbamidomethylation; Oxidation (M)	1026900000	599870000	2838900000	1995300000	63100000	740000	50141	Elongation factor 1-alpha 1 OS=Homo sapiens OX=9606 GN=EEF1A1 PE=1 SV=1
P04406	79	61	59	Carbamidomethylation; Oxidation (M)	32967000	158090000	1245700000	1319300000	20200000000	891000000	36053	Glyceraldehyde-3-phosphate dehydrogenase OS=Homo sapiens OX=9606 GN=GAPDH PE=1 SV=3
P27708	44	68	66	Carbamidomethylation; Oxidation (M); Acetylation (Protein N-term)	26672000	99135000	217600000	398880000	644000000	41500000	242981	CAD protein OS=Homo sapiens OX=9606 GN=CAD PE=1 SV=3
P31327	57	93	91	Carbamidomethylation; Oxidation (M)	25966000	35227000	277130000	448400000	1320000000	152000000	164939	Carbamoyl-phosphate synthase [ammonia] mitochondrial OS=Homo sapiens OX=9606 GN=CPS1 PE=1 SV=2
Q00610	51	79	64	Carbamidomethylation	10403000	24273000	153100000	315560000	1680000000	144000000	191613	Clathrin heavy chain 1 OS=Homo sapiens OX=9606 GN=CLTC PE=1 SV=5
P08670	89	96	81	Carbamidomethylation; Oxidation (M)	167590000	379730000	886840000	1561900000	6600000000	439000000	53652	Vimentin OS=Homo sapiens OX=9606 GN=VIM PE=1 SV=4
Q13885	73	78	3	Carbamidomethylation; Oxidation (M)	0	4292600	10767000	4456100	3670000	0	49907	Tubulin beta-2A chain OS=Homo sapiens OX=9606 GN=TUBB2A PE=1 SV=1
Q08211	53	66	66	Carbamidomethylation; Oxidation (M)	29427000	79707000	306860000	426630000	1700000000	129000000	140958	ATP-dependent RNA helicase A OS=Homo sapiens OX=9606 GN=DHX9 PE=1 SV=4
P06733	80	65	65	Carbamidomethylation; Oxidation (M)	75579000	117760000	983970000	981120000	19700000000	1390000000	47169	Alpha-enolase OS=Homo sapiens OX=9606 GN=ENO1 PE=1 SV=2
P09874	53	51	51	Carbamidomethylation; Acetylation (Protein N-term)	12889000	29809000	219960000	318480000	1210000000	60600000	113084	Poly [ADP-ribose] polymerase 1 OS=Homo sapiens OX=9606 GN=PARP1 PE=1 SV=4
P04075	77	44	40	Carbamidomethylation	51180000	54265000	489050000	1146700000	6450000000	347000000	39420	Fructose-bisphosphate aldolase A OS=Homo sapiens OX=9606 GN=ALDOA PE=1 SV=2
P36578	50	61	61	Carbamidomethylation; Acetylation (Protein N-term)	151930000	226950000	668520000	882320000	1850000000	120000000	47697	60S ribosomal protein L4 OS=Homo sapiens OX=9606 GN=RPL4 PE=1 SV=5
P10809	73	57	57	Oxidation (M)	17197000	33568000	250390000	528790000	1570000000	96200000	61055	60 kDa heat shock protein mitochondrial OS=Homo sapiens OX=9606 GN=HSPD1 PE=1 SV=2
Q6P2Q9	43	79	79	Acetylation (Protein N-term)	7474600	35568000	113050000	188520000	774000000	164000000	273599	Pre-mRNA-processing-splicing factor 8 OS=Homo sapiens OX=9606 GN=PRPF8 PE=1 SV=2
P68366	73	93	7	Carbamidomethylation; Oxidation (M)	189070	1515700	15417000	25091000	182000000	5850000	49924	Tubulin alpha-4A chain OS=Homo sapiens OX=9606 GN=TUBA4A PE=1 SV=1
Q13509	62	60	5	Carbamidomethylation; Oxidation (M)	590860	0	15915000	28632000	65100000	9320000	50433	Tubulin beta-3 chain OS=Homo sapiens OX=9606 GN=TUBB3 PE=1 SV=2
P39023	54	49	49	Carbamidomethylation; Oxidation (M)	48667000	54266000	179110000	228790000	1750000000	102000000	46109	60S ribosomal protein L3 OS=Homo sapiens OX=9606 GN=RPL3 PE=1 SV=2
P07355	80	57	57	Carbamidomethylation; Acetylation (Protein N-term)	237370000	233920000	835250000	951090000	4280000000	598000000	38604	Annexin A2 OS=Homo sapiens OX=9606 GN=ANXA2 PE=1 SV=2
P11021	57	51	49	Oxidation (M)	35729000	44781000	326840000	513830000	3710000000	290000000	72333	Endoplasmic reticulum chaperone BiP OS=Homo sapiens OX=9606 GN=HSPA5 PE=1 SV=2
Q9Y490	32	48	48	Carbamidomethylation; Oxidation (M)	12424000	22417000	86178000	117930000	317000000	12200000	269765	Talin-1 OS=Homo sapiens OX=9606 GN=TLN1 PE=1 SV=3
P07814	51	64	64	Carbamidomethylation	18452000	87230000	234650000	341360000	1100000000	42000000	170590	Bifunctional glutamate/proline--tRNA ligase OS=Homo sapiens OX=9606 GN=EPRS1 PE=1 SV=5
P19338	55	61	61	Oxidation (M)	53530000	105500000	484270000	736140000	2250000000	170000000	76615	Nucleolin OS=Homo sapiens OX=9606 GN=NCL PE=1 SV=3
P52272	71	53	53	Carbamidomethylation; Oxidation (M); Acetylation (Protein N-term)	36506000	54392000	340740000	444420000	1440000000	82800000	77516	Heterogeneous nuclear ribonucleoprotein M OS=Homo sapiens OX=9606 GN=HNRNPM PE=1 SV=3
P22314	52	58	58	Carbamidomethylation; Oxidation (M)	57018000	85582000	477780000	714940000	1560000000	50500000	117849	Ubiquitin-like modifier-activating enzyme 1 OS=Homo sapiens OX=9606 GN=UBA1 PE=1 SV=3
Q12906	64	53	48		11158000	25518000	103230000	221830000	872000000	96000000	95339	Interleukin enhancer-binding factor 3 OS=Homo sapiens OX=9606 GN=ILF3 PE=1 SV=3
Q15233	70	65	64	Carbamidomethylation; Oxidation (M)	70342000	65765000	382230000	688050000	1140000000	830000000	54232	Non-POU domain-containing octamer-binding protein OS=Homo sapiens OX=9606 GN=NONO PE=1 SV=4
Q92616	37	78	78	Carbamidomethylation; Acetylation (Protein N-term)	20197000	29865000	213320000	142770000	818000000	25700000	292756	eIF-2-alpha kinase activator GCN1 OS=Homo sapiens OX=9606 GN=GCN1 PE=1 SV=6
P61978	65	56	55	Carbamidomethylation; Oxidation (M); Acetylation (Protein N-term)	264810000	205110000	1068400000	1273100000	3810000000	226000000	50976	Heterogeneous nuclear ribonucleoprotein K OS=Homo sapiens OX=9606 GN=HNRNPK PE=1 SV=1
P23246	53	46	45	Carbamidomethylation; Oxidation (M)	21547000	40904000	210840000	397710000	2180000000	371000000	76150	Splicing factor proline- and glutamine-rich OS=Homo sapiens OX=9606 GN=SFPQ PE=1 SV=2
P13010	55	36	36	Carbamidomethylation	4264900	29703000	115050000	235650000	944000000	43700000	82705	X-ray repair cross-complementing protein 5 OS=Homo sapiens OX=9606 GN=XRCC5 PE=1 SV=3
O60506	60	36	31	Carbamidomethylation; Acetylation (Protein N-term)	769650	12580000	169160000	256630000	791000000	72100000	69603	Heterogeneous nuclear ribonucleoprotein Q OS=Homo sapiens OX=9606 GN=SYNCRIP PE=1 SV=2
P0DMV8	60	46	22	Carbamidomethylation	19529000	62994000	124620000	147900000	1870000000	109000000	70052	Heat shock 70 kDa protein 1A OS=Homo sapiens OX=9606 GN=HSPA1A PE=1 SV=1
P0DMV9	60	46	22	Carbamidomethylation	19529000	62994000	124620000	147900000	1870000000	109000000	70052	Heat shock 70 kDa protein 1B OS=Homo sapiens OX=9606 GN=HSPA1B PE=1 SV=1
P42704	55	62	62	Carbamidomethylation; Oxidation (M)	4104800	8493300	104570000	201660000	1160000000	63700000	157904	Leucine-rich PPR motif-containing protein mitochondrial OS=Homo sapiens OX=9606 GN=LRPPRC PE=1 SV=3
P26599	75	28	27	Carbamidomethylation; Oxidation (M); Acetylation (Protein N-term)	30941000	42743000	129760000	199810000	1370000000	69600000	57221	Polypyrimidine tract-binding protein 1 OS=Homo sapiens OX=9606 GN=PTBP1 PE=1 SV=1
P26038	62	48	36	Oxidation (M)	47398000	73032000	241560000	331980000	1340000000	91000000	67820	Moesin OS=Homo sapiens OX=9606 GN=MSN PE=1 SV=3
Q08J23	65	45	45	Carbamidomethylation	15457000	29905000	143380000	177990000	681000000	71100000	86471	RNA cytosine C(5)-methyltransferase NSUN2 OS=Homo sapiens OX=9606 GN=NSUN2 PE=1 SV=2
P80723	90	36	36		107070000	242280000	558190000	881200000	2050000000	129000000	22693	Brain acid soluble protein 1 OS=Homo sapiens OX=9606 GN=BASP1 PE=1 SV=2
P11388	49	75	61	Carbamidomethylation; Oxidation (M); Acetylation (Protein N-term)	11007000	20068000	139370000	145870000	635000000	94600000	174384	DNA topoisomerase 2-alpha OS=Homo sapiens OX=9606 GN=TOP2A PE=1 SV=3
Q13435	61	48	48	Oxidation (M); Acetylation (Protein N-term)	27271000	23060000	150900000	183610000	410000000	93300000	100228	Splicing factor 3B subunit 2 OS=Homo sapiens OX=9606 GN=SF3B2 PE=1 SV=2
Q9NR30	56	58	53	Carbamidomethylation	23430000	62878000	203680000	345630000	1340000000	76600000	87344	Nucleolar RNA helicase 2 OS=Homo sapiens OX=9606 GN=DDX21 PE=1 SV=5
Q92945	47	29	29	Oxidation (M); Acetylation (Protein N-term)	20336000	36696000	127090000	180550000	572000000	98300000	73115	Far upstream element-binding protein 2 OS=Homo sapiens OX=9606 GN=KHSRP PE=1 SV=4
P49792	26	56	55		14131000	10615000	60618000	116660000	720000000	286000000	358201	E3 SUMO-protein ligase RanBP2 OS=Homo sapiens OX=9606 GN=RANBP2 PE=1 SV=2
O75533	44	44	44		9555300	15370000	98014000	143860000	415000000	30000000	145830	Splicing factor 3B subunit 1 OS=Homo sapiens OX=9606 GN=SF3B1 PE=1 SV=3
Q04695	83	50	34	Carbamidomethylation; Acetylation (Protein N-term)	75262000	41304000	73373000	131390000	166000000	27400000	48106	Keratin type I cytoskeletal 17 OS=Homo sapiens OX=9606 GN=KRT17 PE=1 SV=2
P06748	75	42	42	Carbamidomethylation; Oxidation (M); Acetylation (Protein N-term)	339870000	407650000	629670000	832330000	1920000000	90200000	32575	Nucleophosmin OS=Homo sapiens OX=9606 GN=NPM1 PE=1 SV=2
P11142	60	49	32	Carbamidomethylation; Oxidation (M)	8555400	56420000	187450000	390560000	9530000000	506000000	70898	Heat shock cognate 71 kDa protein OS=Homo sapiens OX=9606 GN=HSPA8 PE=1 SV=1
Q14697	55	38	38		57730000	83357000	160340000	286150000	615000000	72700000	106874	Neutral alpha-glucosidase AB OS=Homo sapiens OX=9606 GN=GANAB PE=1 SV=3
P14625	64	53	50	Carbamidomethylation	8963300	24180000	121450000	252980000	1950000000	1260000000	92469	Endoplasmin OS=Homo sapiens OX=9606 GN=HSP90B1 PE=1 SV=1
P06576	69	30	30	Oxidation (M)	16570000	32354000	73299000	96523000	565000000	83300000	56560	ATP synthase subunit beta mitochondrial OS=Homo sapiens OX=9606 GN=ATP5F1B PE=1 SV=3
Q9NZM1	36	61	61		2757500	12859000	106790000	185030000	525000000	31100000	234706	Myoferlin OS=Homo sapiens OX=9606 GN=MYOF PE=1 SV=1
P09651	65	54	19	Carbamidomethylation	11570000	29256000	230300000	213760000	706000000	31700000	38747	Heterogeneous nuclear ribonucleoprotein A1 OS=Homo sapiens OX=9606 GN=HNRNPA1 PE=1 SV=5
P63244	81	37	37	Carbamidomethylation; Oxidation (M)	17386000	58543000	414010000	570860000	1910000000	109000000	35077	Receptor of activated protein C kinase 1 OS=Homo sapiens OX=9606 GN=RACK1 PE=1 SV=3
P16403	48	43	13	Acetylation (Protein N-term)	696800000	784380000	531550000	506880000	455000000	12200000	21365	Histone H1.2 OS=Homo sapiens OX=9606 GN=H1-2 PE=1 SV=2
P35527	56	29	28	Acetylation (Protein N-term)	3343100	23658000	209980000	114000000	1120000000	701000000	62064	Keratin type I cytoskeletal 9 OS=Homo sapiens OX=9606 GN=KRT9 PE=1 SV=3
P49736	57	43	43	Carbamidomethylation; Acetylation (Protein N-term)	30412000	126390000	194780000	276440000	631000000	216000000	101896	DNA replication licensing factor MCM2 OS=Homo sapiens OX=9606 GN=MCM2 PE=1 SV=4
P08727	84	40	28	Acetylation (Protein N-term)	20086000	113770000	147460000	299350000	750000000	115000000	44106	Keratin type I cytoskeletal 19 OS=Homo sapiens OX=9606 GN=KRT19 PE=1 SV=4
P30101	67	44	44	Carbamidomethylation; Oxidation (M)	53388000	24210000	341690000	240890000	1710000000	99600000	56782	Protein disulfide-isomerase A3 OS=Homo sapiens OX=9606 GN=PDIA3 PE=1 SV=4
O60841	39	38	38	Carbamidomethylation	4869200	19264000	93813000	160480000	596000000	24600000	138827	Eukaryotic translation initiation factor 5B OS=Homo sapiens OX=9606 GN=EIF5B PE=1 SV=4
P46940	51	63	63	Carbamidomethylation; Oxidation (M); Acetylation (Protein N-term)	25385000	24637000	136420000	203280000	2830000000	912000000	189251	Ras GTPase-activating-like protein IQGAP1 OS=Homo sapiens OX=9606 GN=IQGAP1 PE=1 SV=1
P00558	83	41	41	Carbamidomethylation; Oxidation (M); Acetylation (Protein N-term)	6150800	12903000	174480000	286160000	6070000000	309000000	44615	Phosphoglycerate kinase 1 OS=Homo sapiens OX=9606 GN=PGK1 PE=1 SV=3
Q06830	86	47	40	Carbamidomethylation; Oxidation (M); Acetylation (Protein N-term)	137600000	587660000	1807800000	2401200000	3520000000	184000000	22110	Peroxiredoxin-1 OS=Homo sapiens OX=9606 GN=PRDX1 PE=1 SV=1
P55072	61	61	61	Carbamidomethylation; Oxidation (M); Acetylation (Protein N-term)	87943000	113610000	386920000	504100000	1350000000	608000000	89322	Transitional endoplasmic reticulum ATPase OS=Homo sapiens OX=9606 GN=VCP PE=1 SV=4
P04264	55	49	38	Carbamidomethylation	13705000	90807000	251790000	202840000	512000000	577000000	66039	Keratin type II cytoskeletal 1 OS=Homo sapiens OX=9606 GN=KRT1 PE=1 SV=6
Q9Y5B9	40	38	38	Acetylation (Protein N-term)	6746700	22802000	222070000	434730000	760000000	61900000	119914	FACT complex subunit SPT16 OS=Homo sapiens OX=9606 GN=SUPT16H PE=1 SV=1
P78371	73	47	47	Carbamidomethylation; Oxidation (M); Acetylation (Protein N-term)	11636000	34627000	202050000	376280000	1570000000	161000000	57488	T-complex protein 1 subunit beta OS=Homo sapiens OX=9606 GN=CCT2 PE=1 SV=4
Q13263	46	35	35	Oxidation (M); Acetylation (Protein N-term)	245540000	435860000	203090000	265080000	583000000	25200000	88550	Transcription intermediary factor 1-beta OS=Homo sapiens OX=9606 GN=TRIM28 PE=1 SV=5
P67809	70	28	22	Acetylation (Protein N-term)	13445000	82322000	350630000	511100000	991000000	32800000	35924	Y-box-binding protein 1 OS=Homo sapiens OX=9606 GN=YBX1 PE=1 SV=3
P38646	48	38	35	Oxidation (M)	106950000	119760000	124400000	133150000	570000000	40600000	73681	Stress-70 protein mitochondrial OS=Homo sapiens OX=9606 GN=HSPA9 PE=1 SV=2
Q96AE4	59	34	32	Carbamidomethylation; Acetylation (Protein N-term)	36039000	36967000	203520000	303830000	567000000	21200000	67560	Far upstream element-binding protein 1 OS=Homo sapiens OX=9606 GN=FUBP1 PE=1 SV=3
P14866	56	33	33	Carbamidomethylation; Oxidation (M)	5909900	11799000	103340000	206600000	1210000000	83500000	64133	Heterogeneous nuclear ribonucleoprotein L OS=Homo sapiens OX=9606 GN=HNRNPL PE=1 SV=2
P05023	39	38	27		695380	16260000	59216000	125730000	1020000000	130000000	112896	Sodium/potassium-transporting ATPase subunit alpha-1 OS=Homo sapiens OX=9606 GN=ATP1A1 PE=1 SV=1
P04083	62	27	27	Carbamidomethylation; Acetylation (Protein N-term)	6941000	20540000	229940000	300240000	3800000000	234000000	38714	Annexin A1 OS=Homo sapiens OX=9606 GN=ANXA1 PE=1 SV=2
O76021	47	31	31	Carbamidomethylation; Oxidation (M); Acetylation (Protein N-term)	14966000	31670000	73702000	136270000	468000000	23300000	54973	Ribosomal L1 domain-containing protein 1 OS=Homo sapiens OX=9606 GN=RSL1D1 PE=1 SV=3
Q9BUF5	69	47	12	Carbamidomethylation; Oxidation (M)	635830	0	19692000	19419000	146000000	11600000	49857	Tubulin beta-6 chain OS=Homo sapiens OX=9606 GN=TUBB6 PE=1 SV=1
Q7Z6Z7	18	41	41	Carbamidomethylation	2354400	14284000	48984000	101580000	54600000	17700000	481896	E3 ubiquitin-protein ligase HUWE1 OS=Homo sapiens OX=9606 GN=HUWE1 PE=1 SV=3
P43243	49	44	44	Carbamidomethylation; Oxidation (M)	114900000	105670000	83480000	158190000	1520000000	68900000	94623	Matrin-3 OS=Homo sapiens OX=9606 GN=MATR3 PE=1 SV=2
P48643	62	38	38	Carbamidomethylation; Oxidation (M); Acetylation (Protein N-term)	11218000	30197000	221250000	330520000	1220000000	64000000	59671	T-complex protein 1 subunit epsilon OS=Homo sapiens OX=9606 GN=CCT5 PE=1 SV=1
Q13813	30	46	46		9690900	24556000	83186000	121160000	981000000	82100000	284538	Spectrin alpha chain non-erythrocytic 1 OS=Homo sapiens OX=9606 GN=SPTAN1 PE=1 SV=3
O15067	35	32	32	Carbamidomethylation	2613700	27376000	87990000	94103000	263000000	22100000	144734	Phosphoribosylformylglycinamidine synthase OS=Homo sapiens OX=9606 GN=PFAS PE=1 SV=4
P32004	34	34	34	Carbamidomethylation	38024000	86018000	228830000	403250000	374000000	147000000	140003	Neural cell adhesion molecule L1 OS=Homo sapiens OX=9606 GN=L1CAM PE=1 SV=2
P61247	65	40	40	Carbamidomethylation; Oxidation (M)	71631000	176380000	231010000	342310000	1190000000	189000000	29945	40S ribosomal protein S3a OS=Homo sapiens OX=9606 GN=RPS3A PE=1 SV=2
P02786	53	42	42	Oxidation (M)	629000000	415290000	143670000	221880000	1250000000	119000000	84871	Transferrin receptor protein 1 OS=Homo sapiens OX=9606 GN=TFRC PE=1 SV=2
P63241	81	34	34	Carbamidomethylation; Oxidation (M); Acetylation (Protein N-term)	24093000	53054000	659570000	1022200000	1990000000	79200000	16832	Eukaryotic translation initiation factor 5A-1 OS=Homo sapiens OX=9606 GN=EIF5A PE=1 SV=2
P26640	38	44	44	Carbamidomethylation; Acetylation (Protein N-term)	17031000	22565000	132210000	214900000	361000000	55900000	140476	Valine--tRNA ligase OS=Homo sapiens OX=9606 GN=VARS1 PE=1 SV=4
P12956	56	41	41	Acetylation (Protein N-term)	11540000	37780000	115210000	286560000	1590000000	99800000	69843	X-ray repair cross-complementing protein 6 OS=Homo sapiens OX=9606 GN=XRCC6 PE=1 SV=2
P11940	62	40	10	Carbamidomethylation; Oxidation (M); Acetylation (Protein N-term)	10484000	7629900	58772000	89097000	1290000000	26200000	70671	Polyadenylate-binding protein 1 OS=Homo sapiens OX=9606 GN=PABPC1 PE=1 SV=2
O15355	45	20	20	Carbamidomethylation	19587000	21609000	81842000	106240000	196000000	15000000	59272	Protein phosphatase 1G OS=Homo sapiens OX=9606 GN=PPM1G PE=1 SV=1
P04792	91	37	37	Oxidation (M)	64980000	92091000	222060000	299070000	1610000000	86700000	22783	Heat shock protein beta-1 OS=Homo sapiens OX=9606 GN=HSPB1 PE=1 SV=2
Q9UQ80	79	39	39	Carbamidomethylation; Oxidation (M); Acetylation (Protein N-term)	147630000	75990000	278970000	489130000	1500000000	94400000	43787	Proliferation-associated protein 2G4 OS=Homo sapiens OX=9606 GN=PA2G4 PE=1 SV=3
P31943	58	32	22	Carbamidomethylation; Oxidation (M); Acetylation (Protein N-term)	186400000	52548000	86029000	113540000	576000000	41500000	49229	Heterogeneous nuclear ribonucleoprotein H OS=Homo sapiens OX=9606 GN=HNRNPH1 PE=1 SV=4
P05388	72	27	8	Carbamidomethylation; Oxidation (M)	883730	0	69784000	125150000	740000000	33900000	34274	60S acidic ribosomal protein P0 OS=Homo sapiens OX=9606 GN=RPLP0 PE=1 SV=1
P22102	38	30	30	Carbamidomethylation; Oxidation (M)	6145000	21526000	82527000	125730000	368000000	19200000	107767	Trifunctional purine biosynthetic protein adenosine-3 OS=Homo sapiens OX=9606 GN=GART PE=1 SV=1
P15924	21	38	38	Carbamidomethylation	5338300	9714800	40889000	57970000	265000000	21200000	331774	Desmoplakin OS=Homo sapiens OX=9606 GN=DSP PE=1 SV=3
Q8NC51	62	32	32	Carbamidomethylation	111380000	95695000	186150000	406280000	1110000000	48700000	44965	Plasminogen activator inhibitor 1 RNA-binding protein OS=Homo sapiens OX=9606 GN=SERBP1 PE=1 SV=2
P17844	55	44	35	Carbamidomethylation; Oxidation (M)	9967200	26543000	80516000	181670000	831000000	67100000	69148	Probable ATP-dependent RNA helicase DDX5 OS=Homo sapiens OX=9606 GN=DDX5 PE=1 SV=1
Q9Y2W1	33	32	31	Oxidation (M)	6212100	18558000	62840000	111360000	620000000	25300000	108666	Thyroid hormone receptor-associated protein 3 OS=Homo sapiens OX=9606 GN=THRAP3 PE=1 SV=2
Q16891	51	35	35		6584100	20385000	77667000	121250000	355000000	13500000	83678	MICOS complex subunit MIC60 OS=Homo sapiens OX=9606 GN=IMMT PE=1 SV=1
P62937	76	36	35	Carbamidomethylation; Oxidation (M)	29688000	62932000	587930000	1016600000	8950000000	489000000	18012	Peptidyl-prolyl cis-trans isomerase A OS=Homo sapiens OX=9606 GN=PPIA PE=1 SV=2
P29401	55	31	31	Carbamidomethylation; Acetylation (Protein N-term)	30996000	48919000	152890000	225160000	510000000	152000000	67878	Transketolase OS=Homo sapiens OX=9606 GN=TKT PE=1 SV=3
O60664	76	26	26	Carbamidomethylation; Acetylation (Protein N-term)	3790100	9855800	112230000	199670000	574000000	60800000	47075	Perilipin-3 OS=Homo sapiens OX=9606 GN=PLIN3 PE=1 SV=3
Q15029	49	40	39	Carbamidomethylation	26834000	72703000	234780000	100320000	412000000	674000000	109436	116 kDa U5 small nuclear ribonucleoprotein component OS=Homo sapiens OX=9606 GN=EFTUD2 PE=1 SV=1
P49368	54	38	38	Carbamidomethylation; Oxidation (M); Acetylation (Protein N-term)	17864000	85311000	211300000	358910000	1150000000	113000000	60534	T-complex protein 1 subunit gamma OS=Homo sapiens OX=9606 GN=CCT3 PE=1 SV=4
P25705	54	31	31	Oxidation (M)	11122000	16553000	47789000	97608000	470000000	53100000	59751	ATP synthase subunit alpha mitochondrial OS=Homo sapiens OX=9606 GN=ATP5F1A PE=1 SV=1
P55265	34	34	34	Carbamidomethylation	17571000	36282000	83482000	160600000	813000000	73200000	136066	Double-stranded RNA-specific adenosine deaminase OS=Homo sapiens OX=9606 GN=ADAR PE=1 SV=4
P16615	31	27	27	Carbamidomethylation	7066200	43731000	76238000	121820000	680000000	28700000	114757	Sarcoplasmic/endoplasmic reticulum calcium ATPase 2 OS=Homo sapiens OX=9606 GN=ATP2A2 PE=1 SV=1
P42167	56	25	11	Carbamidomethylation	1376700	3000000	17238000	38940000	47200000	674000	50670	Lamina-associated polypeptide 2 isoforms beta/gamma OS=Homo sapiens OX=9606 GN=TMPO PE=1 SV=2
P27824	48	30	30	Oxidation (M)	7013000	6708000	77576000	120750000	1140000000	89400000	67568	Calnexin OS=Homo sapiens OX=9606 GN=CANX PE=1 SV=2
P08729	67	51	36	Oxidation (M); Acetylation (Protein N-term)	96295000	398900000	799600000	1254500000	477000000	412000000	51386	Keratin type II cytoskeletal 7 OS=Homo sapiens OX=9606 GN=KRT7 PE=1 SV=5
P07237	73	34	34		14431000	29197000	96234000	141570000	1190000000	105000000	57116	Protein disulfide-isomerase OS=Homo sapiens OX=9606 GN=P4HB PE=1 SV=3
P20810	56	32	32	Carbamidomethylation; Oxidation (M)	6588900	13132000	129180000	178430000	537000000	112000000	76573	Calpastatin OS=Homo sapiens OX=9606 GN=CAST PE=1 SV=4
P27816	54	48	48	Carbamidomethylation; Oxidation (M); Acetylation (Protein N-term)	21449000	64963000	211870000	324650000	729000000	62900000	121005	Microtubule-associated protein 4 OS=Homo sapiens OX=9606 GN=MAP4 PE=1 SV=3
Q05639	55	42	7	Carbamidomethylation; Oxidation (M)	0	0	9885900	4111600	1360000000	70200000	50470	Elongation factor 1-alpha 2 OS=Homo sapiens OX=9606 GN=EEF1A2 PE=1 SV=1
O43390	53	32	27	Carbamidomethylation; Acetylation (Protein N-term)	5333200	8435400	74072000	160600000	536000000	71500000	70943	Heterogeneous nuclear ribonucleoprotein R OS=Homo sapiens OX=9606 GN=HNRNPR PE=1 SV=1
P62081	69	30	30	Oxidation (M)	35668000	37981000	320110000	193520000	1210000000	67500000	22127	40S ribosomal protein S7 OS=Homo sapiens OX=9606 GN=RPS7 PE=1 SV=1
Q14690	32	41	41	Carbamidomethylation	10995000	5444500	76272000	136690000	273000000	9800000	208699	Protein RRP5 homolog OS=Homo sapiens OX=9606 GN=PDCD11 PE=1 SV=3
Q9GZR7	40	26	26		16706000	28034000	83732000	124090000	128000000	6120000	96332	ATP-dependent RNA helicase DDX24 OS=Homo sapiens OX=9606 GN=DDX24 PE=1 SV=1
P55060	43	36	36	Carbamidomethylation; Oxidation (M); Acetylation (Protein N-term)	5487600	31874000	101880000	151520000	810000000	50100000	110417	Exportin-2 OS=Homo sapiens OX=9606 GN=CSE1L PE=1 SV=3
P55884	43	23	23	Carbamidomethylation; Acetylation (Protein N-term)	615390	7071400	104850000	151460000	606000000	27400000	92482	Eukaryotic translation initiation factor 3 subunit B OS=Homo sapiens OX=9606 GN=EIF3B PE=1 SV=3
P33991	54	42	42	Carbamidomethylation	16539000	16744000	115940000	163940000	444000000	18300000	96558	DNA replication licensing factor MCM4 OS=Homo sapiens OX=9606 GN=MCM4 PE=1 SV=5
Q13310	60	35	22	Carbamidomethylation; Oxidation (M); Acetylation (Protein N-term)	5409100	31616000	72204000	117090000	222000000	67400000	70783	Polyadenylate-binding protein 4 OS=Homo sapiens OX=9606 GN=PABPC4 PE=1 SV=1
Q9UQ35	18	33	33	Carbamidomethylation; Oxidation (M); Acetylation (Protein N-term)	20181000	19387000	42988000	80206000	410000000	25900000	299616	Serine/arginine repetitive matrix protein 2 OS=Homo sapiens OX=9606 GN=SRRM2 PE=1 SV=2
P60842	59	37	22	Carbamidomethylation; Oxidation (M)	23049000	37754000	195340000	393040000	1740000000	178000000	46154	Eukaryotic initiation factor 4A-I OS=Homo sapiens OX=9606 GN=EIF4A1 PE=1 SV=1
P25205	54	41	40	Carbamidomethylation; Acetylation (Protein N-term)	21124000	18705000	104190000	167610000	375000000	20300000	90981	DNA replication licensing factor MCM3 OS=Homo sapiens OX=9606 GN=MCM3 PE=1 SV=3
Q15365	82	35	31	Carbamidomethylation; Oxidation (M); Acetylation (Protein N-term)	41163000	53409000	248070000	340650000	581000000	25500000	37498	Poly(rC)-binding protein 1 OS=Homo sapiens OX=9606 GN=PCBP1 PE=1 SV=2
P18669	79	29	29	Carbamidomethylation; Oxidation (M); Acetylation (Protein N-term)	25530000	8667000	445770000	811690000	2170000000	54400000	28804	Phosphoglycerate mutase 1 OS=Homo sapiens OX=9606 GN=PGAM1 PE=1 SV=2
Q16576	54	21	14	Carbamidomethylation; Oxidation (M); Acetylation (Protein N-term)	20135000	40463000	118790000	166660000	253000000	25600000	47820	Histone-binding protein RBBP7 OS=Homo sapiens OX=9606 GN=RBBP7 PE=1 SV=1
Q9BZE4	47	28	28	Carbamidomethylation	38145000	86658000	97510000	124240000	169000000	10100000	73965	GTP-binding protein 4 OS=Homo sapiens OX=9606 GN=GTPBP4 PE=1 SV=3
Q96PK6	42	25	25	Carbamidomethylation	16661000	28765000	70985000	69010000	440000000	21500000	69492	RNA-binding protein 14 OS=Homo sapiens OX=9606 GN=RBM14 PE=1 SV=2
P08865	65	36	36	Carbamidomethylation; Oxidation (M); Acetylation (Protein N-term)	16695000	125890000	383590000	472870000	1970000000	79900000	32854	40S ribosomal protein SA OS=Homo sapiens OX=9606 GN=RPSA PE=1 SV=4
P23528	77	36	27	Carbamidomethylation; Oxidation (M); Acetylation (Protein N-term)	59731000	41295000	464470000	614000000	3870000000	234000000	18502	Cofilin-1 OS=Homo sapiens OX=9606 GN=CFL1 PE=1 SV=3
P30041	88	40	40	Carbamidomethylation; Oxidation (M)	29676000	36731000	408230000	554230000	1740000000	107000000	25035	Peroxiredoxin-6 OS=Homo sapiens OX=9606 GN=PRDX6 PE=1 SV=3
Q14676	22	20	20		3140100	1929100	8495700	14421000	89700000	2760000	226664	Mediator of DNA damage checkpoint protein 1 OS=Homo sapiens OX=9606 GN=MDC1 PE=1 SV=3
Q7KZ85	28	33	33		19793000	39906000	90923000	136090000	190000000	14100000	199071	Transcription elongation factor SPT6 OS=Homo sapiens OX=9606 GN=SUPT6H PE=1 SV=2
O75153	25	26	26	Carbamidomethylation	11479000	10720000	26380000	57142000	123000000	11600000	146669	Clustered mitochondria protein homolog OS=Homo sapiens OX=9606 GN=CLUH PE=1 SV=2
Q13283	51	24	21	Acetylation (Protein N-term)	1028200	42027000	149650000	219190000	476000000	15200000	52164	Ras GTPase-activating protein-binding protein 1 OS=Homo sapiens OX=9606 GN=G3BP1 PE=1 SV=1
O43175	42	24	23	Carbamidomethylation	37540000	77186000	159320000	239030000	532000000	49700000	56651	D-3-phosphoglycerate dehydrogenase OS=Homo sapiens OX=9606 GN=PHGDH PE=1 SV=4
Q04637	32	39	39	Carbamidomethylation	34760000	61753000	153060000	169600000	601000000	318000000	175490	Eukaryotic translation initiation factor 4 gamma 1 OS=Homo sapiens OX=9606 GN=EIF4G1 PE=1 SV=4
P49411	62	32	32	Carbamidomethylation; Oxidation (M)	13284000	13641000	75247000	134480000	534000000	55400000	49542	Elongation factor Tu mitochondrial OS=Homo sapiens OX=9606 GN=TUFM PE=1 SV=2
Q99832	59	33	33	Carbamidomethylation; Oxidation (M); Acetylation (Protein N-term)	11157000	44849000	135920000	247560000	1020000000	75400000	59367	T-complex protein 1 subunit eta OS=Homo sapiens OX=9606 GN=CCT7 PE=1 SV=2
Q86UE4	46	22	22		4755500	9601300	27434000	62508000	137000000	9040000	63837	Protein LYRIC OS=Homo sapiens OX=9606 GN=MTDH PE=1 SV=2
P17987	61	33	32	Carbamidomethylation; Oxidation (M); Acetylation (Protein N-term)	2849900	16823000	179800000	317050000	1010000000	49300000	60344	T-complex protein 1 subunit alpha OS=Homo sapiens OX=9606 GN=TCP1 PE=1 SV=1
Q9H583	21	31	31	Carbamidomethylation; Oxidation (M); Acetylation (Protein N-term)	5180200	6424100	57155000	53123000	69100000	8830000	242368	HEAT repeat-containing protein 1 OS=Homo sapiens OX=9606 GN=HEATR1 PE=1 SV=3
P36776	42	27	27		2417000	7308300	23992000	37625000	376000000	341000000	106489	Lon protease homolog mitochondrial OS=Homo sapiens OX=9606 GN=LONP1 PE=1 SV=2
P40227	49	27	27	Carbamidomethylation; Oxidation (M)	5393600	16352000	149810000	263020000	846000000	37100000	58024	T-complex protein 1 subunit zeta OS=Homo sapiens OX=9606 GN=CCT6A PE=1 SV=3
P49915	53	35	35		4720400	13316000	85095000	136630000	379000000	53400000	76716	GMP synthase [glutamine-hydrolyzing] OS=Homo sapiens OX=9606 GN=GMPS PE=1 SV=1
Q9UQE7	34	34	34	Oxidation (M)	6407000	21779000	89656000	157120000	184000000	41300000	141541	Structural maintenance of chromosomes protein 3 OS=Homo sapiens OX=9606 GN=SMC3 PE=1 SV=2
Q02878	58	38	38	Acetylation (Protein N-term)	109890000	176490000	278220000	524260000	1270000000	74000000	32728	60S ribosomal protein L6 OS=Homo sapiens OX=9606 GN=RPL6 PE=1 SV=3
P35908	63	33	21		2941200	10142000	29871000	21723000	251000000	21500000	65433	Keratin type II cytoskeletal 2 epidermal OS=Homo sapiens OX=9606 GN=KRT2 PE=1 SV=2
P34932	50	34	32	Carbamidomethylation	6988700	14265000	108730000	164070000	854000000	71900000	94331	Heat shock 70 kDa protein 4 OS=Homo sapiens OX=9606 GN=HSPA4 PE=1 SV=4
P13667	53	33	33		14088000	21292000	83860000	160330000	606000000	109000000	72933	Protein disulfide-isomerase A4 OS=Homo sapiens OX=9606 GN=PDIA4 PE=1 SV=2
P50991	67	34	33	Carbamidomethylation; Oxidation (M)	7251400	36620000	146880000	246220000	999000000	103000000	57924	T-complex protein 1 subunit delta OS=Homo sapiens OX=9606 GN=CCT4 PE=1 SV=4
P16989	65	18	12	Acetylation (Protein N-term)	1884400	3736300	47212000	83000000	107000000	4320000	40090	Y-box-binding protein 3 OS=Homo sapiens OX=9606 GN=YBX3 PE=1 SV=4
Q92499	46	31	31	Carbamidomethylation	6635900	30876000	156030000	70204000	340000000	28100000	82432	ATP-dependent RNA helicase DDX1 OS=Homo sapiens OX=9606 GN=DDX1 PE=1 SV=2
P23396	77	33	33	Carbamidomethylation; Oxidation (M)	55033000	110290000	517500000	708190000	2520000000	159000000	26688	40S ribosomal protein S3 OS=Homo sapiens OX=9606 GN=RPS3 PE=1 SV=2
Q8IZL8	24	15	15	Carbamidomethylation; Oxidation (M); Acetylation (Protein N-term)	2156000	4206100	21905000	40054000	58200000	8030000	119700	Proline- glutamic acid- and leucine-rich protein 1 OS=Homo sapiens OX=9606 GN=PELP1 PE=1 SV=2
P05387	97	20	19	Oxidation (M)	3587500	12953000	179320000	282570000	1790000000	198000000	11665	60S acidic ribosomal protein P2 OS=Homo sapiens OX=9606 GN=RPLP2 PE=1 SV=1
P51991	44	30	29	Carbamidomethylation; Acetylation (Protein N-term)	40557000	56591000	217740000	399790000	1250000000	47400000	39595	Heterogeneous nuclear ribonucleoprotein A3 OS=Homo sapiens OX=9606 GN=HNRNPA3 PE=1 SV=2
Q9P2E9	25	25	25		4748900	12369000	24502000	51213000	176000000	8020000	152456	Ribosome-binding protein 1 OS=Homo sapiens OX=9606 GN=RRBP1 PE=1 SV=5
P33992	52	38	38	Carbamidomethylation; Oxidation (M); Acetylation (Protein N-term)	7263600	28295000	142510000	180630000	468000000	43900000	82286	DNA replication licensing factor MCM5 OS=Homo sapiens OX=9606 GN=MCM5 PE=1 SV=5
Q9Y2X3	44	22	22	Carbamidomethylation; Oxidation (M)	6469600	13304000	38879000	65289000	412000000	22200000	59578	Nucleolar protein 58 OS=Homo sapiens OX=9606 GN=NOP58 PE=1 SV=1
P07910	74	34	34	Oxidation (M); Acetylation (Protein N-term)	181040000	209470000	291700000	424990000	1250000000	283000000	33670	Heterogeneous nuclear ribonucleoproteins C1/C2 OS=Homo sapiens OX=9606 GN=HNRNPC PE=1 SV=4
Q6P2E9	36	24	24	Carbamidomethylation; Acetylation (Protein N-term)	3081900	2501800	20389000	32327000	154000000	25800000	151661	Enhancer of mRNA-decapping protein 4 OS=Homo sapiens OX=9606 GN=EDC4 PE=1 SV=1
Q14152	29	41	41		3762000	17082000	126660000	207070000	395000000	20400000	166569	Eukaryotic translation initiation factor 3 subunit A OS=Homo sapiens OX=9606 GN=EIF3A PE=1 SV=1
P20042	61	27	27	Acetylation (Protein N-term)	12160000	3537700	104800000	159580000	450000000	13800000	38388	Eukaryotic translation initiation factor 2 subunit 2 OS=Homo sapiens OX=9606 GN=EIF2S2 PE=1 SV=2
Q8WWM7	43	22	22	Carbamidomethylation; Oxidation (M); Acetylation (Protein N-term)	17926000	19805000	46636000	89041000	133000000	4460000	113374	Ataxin-2-like protein OS=Homo sapiens OX=9606 GN=ATXN2L PE=1 SV=2
Q99497	78	21	21	Carbamidomethylation; Oxidation (M)	20737000	15134000	101730000	183110000	759000000	132000000	19891	Parkinson disease protein 7 OS=Homo sapiens OX=9606 GN=PARK7 PE=1 SV=2
P49790	31	28	28	Carbamidomethylation; Oxidation (M); Acetylation (Protein N-term)	13695000	12446000	49139000	97284000	165000000	12300000	153938	Nuclear pore complex protein Nup153 OS=Homo sapiens OX=9606 GN=NUP153 PE=1 SV=2
Q15084	51	21	21		3736900	1041400	50684000	148870000	353000000	22300000	48121	Protein disulfide-isomerase A6 OS=Homo sapiens OX=9606 GN=PDIA6 PE=1 SV=1
O43707	63	46	31	Carbamidomethylation; Acetylation (Protein N-term)	7941500	4811900	53189000	106380000	3300000000	149000000	104854	Alpha-actinin-4 OS=Homo sapiens OX=9606 GN=ACTN4 PE=1 SV=2
P31939	54	24	24	Carbamidomethylation; Oxidation (M)	7918600	7247700	92992000	121950000	504000000	23700000	64616	Bifunctional purine biosynthesis protein ATIC OS=Homo sapiens OX=9606 GN=ATIC PE=1 SV=3
P27797	57	22	22		466540	181890	33322000	39986000	1370000000	95000000	48142	Calreticulin OS=Homo sapiens OX=9606 GN=CALR PE=1 SV=1
P50990	61	41	41	Carbamidomethylation; Acetylation (Protein N-term)	20906000	63569000	157100000	263690000	1590000000	82800000	59621	T-complex protein 1 subunit theta OS=Homo sapiens OX=9606 GN=CCT8 PE=1 SV=4
P52597	52	19	15	Carbamidomethylation; Oxidation (M); Acetylation (Protein N-term)	107610	1576300	51212000	58523000	595000000	26100000	45672	Heterogeneous nuclear ribonucleoprotein F OS=Homo sapiens OX=9606 GN=HNRNPF PE=1 SV=3
Q27J81	34	25	25	Carbamidomethylation	920180	7040400	19429000	32568000	167000000	77400000	135624	Inverted formin-2 OS=Homo sapiens OX=9606 GN=INF2 PE=1 SV=2
O14980	34	33	33	Carbamidomethylation; Acetylation (Protein N-term)	1906100	5103600	69422000	112460000	893000000	46600000	123386	Exportin-1 OS=Homo sapiens OX=9606 GN=XPO1 PE=1 SV=1
Q8IVT2	62	27	27		27875000	79934000	91082000	161310000	314000000	15200000	75357	Mitotic interactor and substrate of PLK1 OS=Homo sapiens OX=9606 GN=MISP PE=1 SV=1
P21796	69	19	17	Acetylation (Protein N-term)	12353000	35915000	14892000	216790000	213000000	844000000	30773	Voltage-dependent anion-selective channel protein 1 OS=Homo sapiens OX=9606 GN=VDAC1 PE=1 SV=2
Q14974	33	25	25	Carbamidomethylation; Acetylation (Protein N-term)	430480	15334000	49227000	107170000	835000000	46300000	97170	Importin subunit beta-1 OS=Homo sapiens OX=9606 GN=KPNB1 PE=1 SV=2
P18583	20	29	29	Carbamidomethylation; Acetylation (Protein N-term)	9617800	18732000	70484000	84291000	155000000	15300000	263827	Protein SON OS=Homo sapiens OX=9606 GN=SON PE=1 SV=4
P62701	68	29	29	Carbamidomethylation; Oxidation (M)	8771800	52244000	281060000	463740000	1500000000	105000000	29598	40S ribosomal protein S4 X isoform OS=Homo sapiens OX=9606 GN=RPS4X PE=1 SV=2
Q8WUM4	44	27	27	Carbamidomethylation	1190600	7712200	67465000	112780000	299000000	14800000	96023	Programmed cell death 6-interacting protein OS=Homo sapiens OX=9606 GN=PDCD6IP PE=1 SV=1
O15031	23	24	24	Carbamidomethylation	18663000	4709400	21232000	19385000	85800000	54900000	205126	Plexin-B2 OS=Homo sapiens OX=9606 GN=PLXNB2 PE=1 SV=3
P69849	35	25	25		1306600	12400000	32956000	48789000	78700000	14400000	134133	Nodal modulator 3 OS=Homo sapiens OX=9606 GN=NOMO3 PE=1 SV=2
Q5JPE7	33	25	25		1306600	12400000	32956000	48789000	78700000	14400000	139439	Nodal modulator 2 OS=Homo sapiens OX=9606 GN=NOMO2 PE=1 SV=1
Q99613	32	23	23	Oxidation (M)	4555800	16946000	74698000	133470000	310000000	14400000	105344	Eukaryotic translation initiation factor 3 subunit C OS=Homo sapiens OX=9606 GN=EIF3C PE=1 SV=1
Q14444	54	26	26	Carbamidomethylation	9392000	18981000	109750000	179010000	599000000	42600000	78366	Caprin-1 OS=Homo sapiens OX=9606 GN=CAPRIN1 PE=1 SV=2
P62424	56	34	34	Carbamidomethylation	47940000	118970000	396890000	627540000	1290000000	69200000	29996	60S ribosomal protein L7a OS=Homo sapiens OX=9606 GN=RPL7A PE=1 SV=2
P33993	52	32	32	Carbamidomethylation	20220000	34671000	141410000	255200000	774000000	107000000	81308	DNA replication licensing factor MCM7 OS=Homo sapiens OX=9606 GN=MCM7 PE=1 SV=4
Q13428	23	26	26		8833600	34158000	54727000	55051000	132000000	13000000	152105	Treacle protein OS=Homo sapiens OX=9606 GN=TCOF1 PE=1 SV=3
P62263	72	15	15	Carbamidomethylation; Oxidation (M)	89069000	142330000	222990000	279680000	805000000	101000000	16273	40S ribosomal protein S14 OS=Homo sapiens OX=9606 GN=RPS14 PE=1 SV=3
Q12905	61	25	25		1650400	7558600	134540000	152910000	1210000000	73800000	43062	Interleukin enhancer-binding factor 2 OS=Homo sapiens OX=9606 GN=ILF2 PE=1 SV=2
P38919	58	27	20	Acetylation (Protein N-term)	16077000	12133000	57546000	102240000	468000000	24400000	46871	Eukaryotic initiation factor 4A-III OS=Homo sapiens OX=9606 GN=EIF4A3 PE=1 SV=4
Q15393	26	21	21		649480	5790200	96751000	112830000	447000000	25700000	135577	Splicing factor 3B subunit 3 OS=Homo sapiens OX=9606 GN=SF3B3 PE=1 SV=4
Q14498	41	22	22	Oxidation (M); Acetylation (Protein N-term)	3814100	15589000	37764000	84064000	347000000	19800000	59380	RNA-binding protein 39 OS=Homo sapiens OX=9606 GN=RBM39 PE=1 SV=2
O00567	51	30	30	Carbamidomethylation	4001700	20455000	59168000	113460000	438000000	54600000	66050	Nucleolar protein 56 OS=Homo sapiens OX=9606 GN=NOP56 PE=1 SV=4
Q8IY81	37	20	20	Oxidation (M)	3798300	12558000	71449000	111390000	260000000	19000000	96558	pre-rRNA 2'-O-ribose RNA methyltransferase FTSJ3 OS=Homo sapiens OX=9606 GN=FTSJ3 PE=1 SV=2
Q14566	42	32	32	Carbamidomethylation; Acetylation (Protein N-term)	23390000	39611000	96848000	183580000	433000000	55800000	92889	DNA replication licensing factor MCM6 OS=Homo sapiens OX=9606 GN=MCM6 PE=1 SV=1
Q9NVP1	45	20	20		159150000	569820000	39970000	65035000	317000000	15600000	75407	ATP-dependent RNA helicase DDX18 OS=Homo sapiens OX=9606 GN=DDX18 PE=1 SV=2
Q13200	41	26	26	Carbamidomethylation; Oxidation (M); Acetylation (Protein N-term)	4138700	19015000	27950000	53745000	380000000	39700000	100200	26S proteasome non-ATPase regulatory subunit 2 OS=Homo sapiens OX=9606 GN=PSMD2 PE=1 SV=3
O75694	24	24	24	Carbamidomethylation	10893000	7407400	68349000	84970000	237000000	43900000	155199	Nuclear pore complex protein Nup155 OS=Homo sapiens OX=9606 GN=NUP155 PE=1 SV=1
P29692	60	17	17	Acetylation (Protein N-term)	28396000	53274000	96101000	173880000	947000000	66000000	31122	Elongation factor 1-delta OS=Homo sapiens OX=9606 GN=EEF1D PE=1 SV=5
P22695	48	13	13		5153000	8224200	17104000	34442000	47700000	8330000	48443	Cytochrome b-c1 complex subunit 2 mitochondrial OS=Homo sapiens OX=9606 GN=UQCRC2 PE=1 SV=3
Q14103	46	25	23	Carbamidomethylation	11387000	37767000	70036000	138920000	554000000	30300000	38434	Heterogeneous nuclear ribonucleoprotein D0 OS=Homo sapiens OX=9606 GN=HNRNPD PE=1 SV=1
Q14157	35	21	21		21983000	52215000	79103000	125980000	278000000	31200000	114534	Ubiquitin-associated protein 2-like OS=Homo sapiens OX=9606 GN=UBAP2L PE=1 SV=2
P34897	49	19	18		6466100	7327800	36922000	65409000	282000000	35100000	55993	Serine hydroxymethyltransferase mitochondrial OS=Homo sapiens OX=9606 GN=SHMT2 PE=1 SV=3
P31946	70	31	21	Acetylation (Protein N-term)	35723000	92503000	253490000	364620000	783000000	59500000	28082	14-3-3 protein beta/alpha OS=Homo sapiens OX=9606 GN=YWHAB PE=1 SV=3
P52292	48	23	23	Carbamidomethylation; Acetylation (Protein N-term)	22385000	30892000	92804000	137600000	298000000	14600000	57862	Importin subunit alpha-1 OS=Homo sapiens OX=9606 GN=KPNA2 PE=1 SV=1
Q7Z2W4	34	26	26	Carbamidomethylation	25307000	48073000	110710000	85102000	201000000	19000000	101431	Zinc finger CCCH-type antiviral protein 1 OS=Homo sapiens OX=9606 GN=ZC3HAV1 PE=1 SV=3
Q12931	33	15	15		4546200	18360000	47838000	38573000	190000000	8130000	80110	Heat shock protein 75 kDa mitochondrial OS=Homo sapiens OX=9606 GN=TRAP1 PE=1 SV=3
P08133	51	27	27		6039300	10074000	44635000	59640000	144000000	61800000	75873	Annexin A6 OS=Homo sapiens OX=9606 GN=ANXA6 PE=1 SV=3
Q15424	23	20	11	Carbamidomethylation; Acetylation (Protein N-term)	4717500	9842100	22903000	38666000	125000000	3330000	102642	Scaffold attachment factor B1 OS=Homo sapiens OX=9606 GN=SAFB PE=1 SV=4
Q01105	48	23	23		11776000	73995000	178160000	333320000	2160000000	161000000	33489	Protein SET OS=Homo sapiens OX=9606 GN=SET PE=1 SV=3
Q99459	50	26	26	Carbamidomethylation	12198000	14129000	43887000	55404000	346000000	17900000	92251	Cell division cycle 5-like protein OS=Homo sapiens OX=9606 GN=CDC5L PE=1 SV=2
P32969	63	19	19	Carbamidomethylation; Oxidation (M)	3284000	8548000	49274000	36070000	583000000	18900000	21863	60S ribosomal protein L9 OS=Homo sapiens OX=9606 GN=RPL9 PE=1 SV=1
P13645	46	29	23	Carbamidomethylation; Oxidation (M)	7575100	25238000	57551000	71461000	371000000	593000000	58827	Keratin type I cytoskeletal 10 OS=Homo sapiens OX=9606 GN=KRT10 PE=1 SV=6
P18754	57	16	16	Carbamidomethylation; Oxidation (M)	1324700	10753000	57899000	81681000	262000000	75100000	44969	Regulator of chromosome condensation OS=Homo sapiens OX=9606 GN=RCC1 PE=1 SV=1
Q09028	57	19	12	Carbamidomethylation; Acetylation (Protein N-term)	9446300	32327000	70450000	108200000	158000000	11700000	47656	Histone-binding protein RBBP4 OS=Homo sapiens OX=9606 GN=RBBP4 PE=1 SV=3
Q99714	87	19	19	Carbamidomethylation; Oxidation (M)	19806000	12982000	59768000	74917000	104000000	7870000	26923	3-hydroxyacyl-CoA dehydrogenase type-2 OS=Homo sapiens OX=9606 GN=HSD17B10 PE=1 SV=3
P11498	38	27	27		5377300	24349000	30627000	66439000	181000000	80000000	129634	Pyruvate carboxylase mitochondrial OS=Homo sapiens OX=9606 GN=PC PE=1 SV=2
Q9Y230	62	25	25	Oxidation (M); Acetylation (Protein N-term)	28451000	38765000	64613000	97237000	776000000	75400000	51157	RuvB-like 2 OS=Homo sapiens OX=9606 GN=RUVBL2 PE=1 SV=3
P20700	61	39	37	Acetylation (Protein N-term)	46344000	62022000	127430000	204350000	655000000	45800000	66408	Lamin-B1 OS=Homo sapiens OX=9606 GN=LMNB1 PE=1 SV=2
P62328	98	17	17	Oxidation (M); Acetylation (Protein N-term)	1653700000	1180700000	2051000000	1881300000	1330000000	78100000	5053	Thymosin beta-4 OS=Homo sapiens OX=9606 GN=TMSB4X PE=1 SV=2
Q92841	53	41	32	Carbamidomethylation; Oxidation (M)	8853600	17951000	138220000	190380000	460000000	182000000	80273	Probable ATP-dependent RNA helicase DDX17 OS=Homo sapiens OX=9606 GN=DDX17 PE=1 SV=2
P49588	40	33	33	Carbamidomethylation; Oxidation (M); Acetylation (Protein N-term)	5635300	5453600	66884000	128340000	349000000	68800000	106810	Alanine--tRNA ligase cytoplasmic OS=Homo sapiens OX=9606 GN=AARS1 PE=1 SV=2
Q9P2J5	29	24	24		738730	8514000	39442000	58297000	333000000	45200000	134466	Leucine--tRNA ligase cytoplasmic OS=Homo sapiens OX=9606 GN=LARS1 PE=1 SV=2
Q8WYP5	18	24	24	Carbamidomethylation	3128800	8113100	29481000	52322000	95500000	5980000	252496	Protein ELYS OS=Homo sapiens OX=9606 GN=AHCTF1 PE=1 SV=3
Q14126	34	17	17	Carbamidomethylation; Oxidation (M)	2069200	2845700	17722000	24741000	63500000	1690000	122294	Desmoglein-2 OS=Homo sapiens OX=9606 GN=DSG2 PE=1 SV=2
P41250	42	23	23		2850200	17454000	35816000	51737000	392000000	18500000	83166	Glycine--tRNA ligase OS=Homo sapiens OX=9606 GN=GARS1 PE=1 SV=3
Q9NTJ3	32	28	28		58560000	223880000	43526000	79736000	175000000	27700000	147182	Structural maintenance of chromosomes protein 4 OS=Homo sapiens OX=9606 GN=SMC4 PE=1 SV=2
Q96TA1	45	21	21	Carbamidomethylation	4440000	9983600	56779000	74869000	326000000	8990000	84138	Protein Niban 2 OS=Homo sapiens OX=9606 GN=NIBAN2 PE=1 SV=3
P62917	57	25	25	Carbamidomethylation; Oxidation (M)	45009000	113000000	200950000	309670000	2100000000	68600000	28025	60S ribosomal protein L8 OS=Homo sapiens OX=9606 GN=RPL8 PE=1 SV=2
P35637	26	14	12	Carbamidomethylation; Oxidation (M)	21169000	11353000	64168000	93400000	420000000	21700000	53426	RNA-binding protein FUS OS=Homo sapiens OX=9606 GN=FUS PE=1 SV=1
Q08945	38	23	23	Carbamidomethylation; Acetylation (Protein N-term)	14108000	6014100	87732000	108860000	233000000	22000000	81075	FACT complex subunit SSRP1 OS=Homo sapiens OX=9606 GN=SSRP1 PE=1 SV=1
Q9Y265	62	24	24	Carbamidomethylation	6843700	7450600	94310000	162600000	409000000	110000000	50228	RuvB-like 1 OS=Homo sapiens OX=9606 GN=RUVBL1 PE=1 SV=1
P62753	43	24	24	Carbamidomethylation; Oxidation (M)	33972000	83192000	218520000	270350000	792000000	35700000	28681	40S ribosomal protein S6 OS=Homo sapiens OX=9606 GN=RPS6 PE=1 SV=1
O60264	38	33	33	Acetylation (Protein N-term)	5272100	20131000	39512000	67025000	179000000	6030000	121905	SWI/SNF-related matrix-associated actin-dependent regulator of chromatin subfamily A member 5 OS=Homo sapiens OX=9606 GN=SMARCA5 PE=1 SV=1
P12277	56	19	19	Carbamidomethylation	941690	3910300	120070000	161010000	1490000000	72800000	42644	Creatine kinase B-type OS=Homo sapiens OX=9606 GN=CKB PE=1 SV=1
Q99536	52	14	14	Oxidation (M); Acetylation (Protein N-term)	1634000	10374000	17154000	22418000	293000000	10300000	41920	Synaptic vesicle membrane protein VAT-1 homolog OS=Homo sapiens OX=9606 GN=VAT1 PE=1 SV=2
P49748	48	24	24	Acetylation (Protein N-term)	4478500	10915000	50725000	68399000	274000000	18400000	70390	Very long-chain specific acyl-CoA dehydrogenase mitochondrial OS=Homo sapiens OX=9606 GN=ACADVL PE=1 SV=1
P05198	63	22	22	Carbamidomethylation	859810	20913000	240290000	157390000	635000000	97200000	36112	Eukaryotic translation initiation factor 2 subunit 1 OS=Homo sapiens OX=9606 GN=EIF2S1 PE=1 SV=3
P55209	35	16	15	Acetylation (Protein N-term)	6540500	12890000	92384000	143220000	760000000	62000000	45374	Nucleosome assembly protein 1-like 1 OS=Homo sapiens OX=9606 GN=NAP1L1 PE=1 SV=1
P00966	53	28	28	Carbamidomethylation	5237400	30429000	214800000	286490000	3220000000	157000000	46530	Argininosuccinate synthase OS=Homo sapiens OX=9606 GN=ASS1 PE=1 SV=2
P16152	68	20	15	Carbamidomethylation; Acetylation (Protein N-term)	5629300	10504000	101080000	150730000	510000000	19200000	30375	Carbonyl reductase [NADPH] 1 OS=Homo sapiens OX=9606 GN=CBR1 PE=1 SV=3
Q9BYG3	61	16	16	Carbamidomethylation; Acetylation (Protein N-term)	8016200	7776100	89968000	34993000	683000000	78500000	34222	MKI67 FHA domain-interacting nucleolar phosphoprotein OS=Homo sapiens OX=9606 GN=NIFK PE=1 SV=1
O75534	30	21	21	Acetylation (Protein N-term)	2429200	18639000	74801000	122330000	374000000	109000000	88885	Cold shock domain-containing protein E1 OS=Homo sapiens OX=9606 GN=CSDE1 PE=1 SV=2
Q15020	25	16	16	Acetylation (Protein N-term)	3882800	10179000	43952000	70559000	90800000	2630000	109935	Squamous cell carcinoma antigen recognized by T-cells 3 OS=Homo sapiens OX=9606 GN=SART3 PE=1 SV=1
A1L0T0	44	15	15	Carbamidomethylation; Oxidation (M)	1643200	1073000	12561000	19543000	112000000	36300000	67868	2-hydroxyacyl-CoA lyase 2 OS=Homo sapiens OX=9606 GN=ILVBL PE=1 SV=2
O14975	39	15	15		262810	4648800	234460000	36000000	35100000	7780000	70312	Very long-chain acyl-CoA synthetase OS=Homo sapiens OX=9606 GN=SLC27A2 PE=1 SV=2
P09661	60	20	20		5407100	27995000	65969000	76937000	263000000	16300000	28416	U2 small nuclear ribonucleoprotein A' OS=Homo sapiens OX=9606 GN=SNRPA1 PE=1 SV=2
P22087	61	19	19	Carbamidomethylation	3720600	24183000	76604000	119370000	505000000	746000000	33784	rRNA 2'-O-methyltransferase fibrillarin OS=Homo sapiens OX=9606 GN=FBL PE=1 SV=2
Q15459	34	22	22		10217000	13216000	65378000	107720000	186000000	63200000	88886	Splicing factor 3A subunit 1 OS=Homo sapiens OX=9606 GN=SF3A1 PE=1 SV=1
P26641	53	25	25	Carbamidomethylation; Oxidation (M); Acetylation (Protein N-term)	45666000	67111000	266200000	427760000	1390000000	103000000	50119	Elongation factor 1-gamma OS=Homo sapiens OX=9606 GN=EEF1G PE=1 SV=3
Q15366	59	23	15	Carbamidomethylation; Oxidation (M)	9903700	9900400	81747000	119590000	744000000	37000000	38580	Poly(rC)-binding protein 2 OS=Homo sapiens OX=9606 GN=PCBP2 PE=1 SV=1
Q7L014	28	24	24	Carbamidomethylation	13599000	18694000	60454000	72588000	149000000	42800000	117362	Probable ATP-dependent RNA helicase DDX46 OS=Homo sapiens OX=9606 GN=DDX46 PE=1 SV=2
Q9NQC3	14	10	10	Oxidation (M); Acetylation (Protein N-term)	7625300	12395000	85479000	111090000	518000000	39400000	129931	Reticulon-4 OS=Homo sapiens OX=9606 GN=RTN4 PE=1 SV=2
P55809	43	17	17		5539900	7850900	26435000	33353000	71000000	109000000	56158	Succinyl-CoA:3-ketoacid coenzyme A transferase 1 mitochondrial OS=Homo sapiens OX=9606 GN=OXCT1 PE=1 SV=1
Q13895	47	18	18		699760	5968500	8958900	27325000	88400000	3490000	49601	Bystin OS=Homo sapiens OX=9606 GN=BYSL PE=1 SV=3
P12814	57	39	23	Carbamidomethylation; Acetylation (Protein N-term)	6774300	5252800	54356000	97658000	429000000	24400000	103058	Alpha-actinin-1 OS=Homo sapiens OX=9606 GN=ACTN1 PE=1 SV=2
Q8TEX9	25	18	18	Acetylation (Protein N-term)	468200	2914300	15920000	34847000	119000000	18500000	118715	Importin-4 OS=Homo sapiens OX=9606 GN=IPO4 PE=1 SV=2
P50454	55	20	20		4688100	7267100	43047000	74297000	143000000	3930000	46441	Serpin H1 OS=Homo sapiens OX=9606 GN=SERPINH1 PE=1 SV=2
Q14151	25	19	10	Carbamidomethylation; Acetylation (Protein N-term)	3943500	3166000	15667000	16090000	55600000	7880000	107474	Scaffold attachment factor B2 OS=Homo sapiens OX=9606 GN=SAFB2 PE=1 SV=1
P11413	39	24	24	Carbamidomethylation; Acetylation (Protein N-term)	20931000	23841000	109590000	152470000	120000000	6270000	59257	Glucose-6-phosphate 1-dehydrogenase OS=Homo sapiens OX=9606 GN=G6PD PE=1 SV=4
P62191	49	20	19		3026700	7763800	57345000	88988000	198000000	5740000	49185	26S proteasome regulatory subunit 4 OS=Homo sapiens OX=9606 GN=PSMC1 PE=1 SV=1
P53999	61	14	14		8432400	19988000	60267000	86891000	772000000	66800000	14395	Activated RNA polymerase II transcriptional coactivator p15 OS=Homo sapiens OX=9606 GN=SUB1 PE=1 SV=3
Q9Y3I0	54	22	22	Carbamidomethylation	10514000	18314000	69746000	71060000	335000000	20900000	55210	RNA-splicing ligase RtcB homolog OS=Homo sapiens OX=9606 GN=RTCB PE=1 SV=1
P62829	71	19	19	Carbamidomethylation; Oxidation (M)	13107000	41198000	107110000	166770000	708000000	71900000	14865	60S ribosomal protein L23 OS=Homo sapiens OX=9606 GN=RPL23 PE=1 SV=1
P31942	56	16	15	Carbamidomethylation; Oxidation (M)	2838100	7885200	29591000	36418000	370000000	91300000	36926	Heterogeneous nuclear ribonucleoprotein H3 OS=Homo sapiens OX=9606 GN=HNRNPH3 PE=1 SV=2
Q02790	58	24	24	Oxidation (M)	1521600	25780000	39972000	83979000	612000000	122000000	51805	Peptidyl-prolyl cis-trans isomerase FKBP4 OS=Homo sapiens OX=9606 GN=FKBP4 PE=1 SV=3
O43143	38	26	26	Carbamidomethylation; Oxidation (M)	48758000	21899000	56228000	402940000	1250000000	27600000	90933	Pre-mRNA-splicing factor ATP-dependent RNA helicase DHX15 OS=Homo sapiens OX=9606 GN=DHX15 PE=1 SV=2
P15311	58	37	23	Oxidation (M)	13084000	19111000	57143000	116210000	476000000	41200000	69413	Ezrin OS=Homo sapiens OX=9606 GN=EZR PE=1 SV=4
Q92922	23	18	16	Carbamidomethylation; Oxidation (M); Acetylation (Protein N-term)	767320	4823900	35168000	38517000	43700000	23500000	122867	SWI/SNF complex subunit SMARCC1 OS=Homo sapiens OX=9606 GN=SMARCC1 PE=1 SV=3
Q92598	46	27	26	Carbamidomethylation	8864300	3474100	25231000	74190000	439000000	13600000	96865	Heat shock protein 105 kDa OS=Homo sapiens OX=9606 GN=HSPH1 PE=1 SV=1
P62805	62	28	28	Oxidation (M)	932920	27505000	116750000	320170000	14800000000	546000000	11367	Histone H4 OS=Homo sapiens OX=9606 GN=H4C1 PE=1 SV=2
P13804	69	16	16	Carbamidomethylation	1054500	3851800	25149000	51283000	185000000	6010000	35080	Electron transfer flavoprotein subunit alpha mitochondrial OS=Homo sapiens OX=9606 GN=ETFA PE=1 SV=1
P50395	56	19	13	Carbamidomethylation	1856000	3416700	20219000	33840000	562000000	26700000	50663	Rab GDP dissociation inhibitor beta OS=Homo sapiens OX=9606 GN=GDI2 PE=1 SV=2
Q96I24	51	18	17	Carbamidomethylation; Oxidation (M); Acetylation (Protein N-term)	13957000	11162000	78831000	154160000	225000000	34200000	61640	Far upstream element-binding protein 3 OS=Homo sapiens OX=9606 GN=FUBP3 PE=1 SV=2
O76094	40	17	17	Acetylation (Protein N-term)	5647600	12149000	28483000	182060000	245000000	22800000	74606	Signal recognition particle subunit SRP72 OS=Homo sapiens OX=9606 GN=SRP72 PE=1 SV=3
P55795	39	15	7	Carbamidomethylation; Acetylation (Protein N-term)	0	0	5470800	9407500	105000000	16400000	49264	Heterogeneous nuclear ribonucleoprotein H2 OS=Homo sapiens OX=9606 GN=HNRNPH2 PE=1 SV=1
P00338	58	23	23	Acetylation (Protein N-term)	6842300	11105000	53358000	67485000	4310000000	375000000	36689	L-lactate dehydrogenase A chain OS=Homo sapiens OX=9606 GN=LDHA PE=1 SV=2
P26368	39	14	14	Carbamidomethylation; Oxidation (M)	2750700	14016000	22071000	23051000	402000000	41500000	53501	Splicing factor U2AF 65 kDa subunit OS=Homo sapiens OX=9606 GN=U2AF2 PE=1 SV=4
Q9BVP2	44	20	20	Carbamidomethylation	2311100	8102500	50851000	65890000	332000000	16800000	61993	Guanine nucleotide-binding protein-like 3 OS=Homo sapiens OX=9606 GN=GNL3 PE=1 SV=2
P06493	63	22	21	Oxidation (M); Acetylation (Protein N-term)	10901000	30625000	90639000	137800000	423000000	25400000	34095	Cyclin-dependent kinase 1 OS=Homo sapiens OX=9606 GN=CDK1 PE=1 SV=3
Q07021	46	17	17	Carbamidomethylation; Oxidation (M)	797680	2071600	95485000	105550000	299000000	39200000	31362	Complement component 1 Q subcomponent-binding protein mitochondrial OS=Homo sapiens OX=9606 GN=C1QBP PE=1 SV=1
P48634	20	22	20		5386100	11711000	23411000	39883000	61500000	3170000	228861	Protein PRRC2A OS=Homo sapiens OX=9606 GN=PRRC2A PE=1 SV=3
Q14978	41	27	27		11826000	26805000	54481000	567230000	186000000	9980000	73603	Nucleolar and coiled-body phosphoprotein 1 OS=Homo sapiens OX=9606 GN=NOLC1 PE=1 SV=2
Q8TDD1	34	19	18	Carbamidomethylation	209810	5442900	29787000	62272000	59600000	22000000	98595	ATP-dependent RNA helicase DDX54 OS=Homo sapiens OX=9606 GN=DDX54 PE=1 SV=2
O96008	64	15	15		6372000	26219000	12195000	25054000	193000000	35600000	37893	Mitochondrial import receptor subunit TOM40 homolog OS=Homo sapiens OX=9606 GN=TOMM40 PE=1 SV=1
P17812	53	25	22	Carbamidomethylation	1494800	0	43492000	92836000	181000000	26200000	66690	CTP synthase 1 OS=Homo sapiens OX=9606 GN=CTPS1 PE=1 SV=2
P51858	76	19	18	Carbamidomethylation	47041000	14052000	328810000	419330000	942000000	29700000	26788	Hepatoma-derived growth factor OS=Homo sapiens OX=9606 GN=HDGF PE=1 SV=1
Q86U42	64	16	16	Oxidation (M); Acetylation (Protein N-term)	58929000	28236000	79027000	73170000	116000000	4410000	32749	Polyadenylate-binding protein 2 OS=Homo sapiens OX=9606 GN=PABPN1 PE=1 SV=3
Q13151	52	17	17	Carbamidomethylation	17672000	25373000	55310000	107320000	137000000	208000000	30841	Heterogeneous nuclear ribonucleoprotein A0 OS=Homo sapiens OX=9606 GN=HNRNPA0 PE=1 SV=1
Q15637	33	16	16	Oxidation (M); Acetylation (Protein N-term)	16118000	17484000	46900000	55567000	144000000	7900000	68330	Splicing factor 1 OS=Homo sapiens OX=9606 GN=SF1 PE=1 SV=4
P35232	64	19	19		21257000	42320000	22889000	34232000	972000000	28300000	29804	Prohibitin OS=Homo sapiens OX=9606 GN=PHB PE=1 SV=1
O00299	71	21	20	Carbamidomethylation; Acetylation (Protein N-term)	23380000	61814000	234260000	256350000	1310000000	365000000	26923	Chloride intracellular channel protein 1 OS=Homo sapiens OX=9606 GN=CLIC1 PE=1 SV=4
Q9UIG0	28	31	31		5395900	27634000	93832000	151580000	275000000	9260000	170902	Tyrosine-protein kinase BAZ1B OS=Homo sapiens OX=9606 GN=BAZ1B PE=1 SV=2
Q8N163	38	19	19		3130200	14584000	35431000	52486000	123000000	7160000	102902	Cell cycle and apoptosis regulator protein 2 OS=Homo sapiens OX=9606 GN=CCAR2 PE=1 SV=2
P62826	73	24	24	Carbamidomethylation; Oxidation (M); Acetylation (Protein N-term)	29397000	102220000	276100000	479000000	2350000000	152000000	24423	GTP-binding nuclear protein Ran OS=Homo sapiens OX=9606 GN=RAN PE=1 SV=3
Q16543	49	20	20	Carbamidomethylation; Acetylation (Protein N-term)	27978000	66291000	104450000	119760000	719000000	73100000	44468	Hsp90 co-chaperone Cdc37 OS=Homo sapiens OX=9606 GN=CDC37 PE=1 SV=1
Q9BWF3	41	11	6		0	619670	10381000	11391000	102000000	1320000	40314	RNA-binding protein 4 OS=Homo sapiens OX=9606 GN=RBM4 PE=1 SV=1
P30153	40	21	17	Carbamidomethylation	391170	1021800	52803000	101740000	393000000	110000000	65309	Serine/threonine-protein phosphatase 2A 65 kDa regulatory subunit A alpha isoform OS=Homo sapiens OX=9606 GN=PPP2R1A PE=1 SV=4
P27695	54	15	15	Carbamidomethylation	5501200	27825000	73935000	154010000	451000000	108000000	35555	DNA-(apurinic or apyrimidinic site) endonuclease OS=Homo sapiens OX=9606 GN=APEX1 PE=1 SV=2
P09429	40	19	16		5864400	39848000	189700000	315330000	830000000	37400000	24894	High mobility group protein B1 OS=Homo sapiens OX=9606 GN=HMGB1 PE=1 SV=3
Q14692	31	26	26		3300100	13499000	16130000	21360000	295000000	10500000	145807	Ribosome biogenesis protein BMS1 homolog OS=Homo sapiens OX=9606 GN=BMS1 PE=1 SV=1
P18206	34	28	28		6984300	4977600	122160000	170980000	1680000000	132000000	123799	Vinculin OS=Homo sapiens OX=9606 GN=VCL PE=1 SV=4
Q16658	47	19	19	Carbamidomethylation	7896100	9017300	21101000	33043000	1430000000	61700000	54530	Fascin OS=Homo sapiens OX=9606 GN=FSCN1 PE=1 SV=3
Q9UHB6	30	17	17		2572000	7935000	22268000	35244000	41200000	3740000	85226	LIM domain and actin-binding protein 1 OS=Homo sapiens OX=9606 GN=LIMA1 PE=1 SV=1
P35998	57	27	27	Carbamidomethylation	2313400	5906100	33368000	60178000	248000000	26900000	48634	26S proteasome regulatory subunit 7 OS=Homo sapiens OX=9606 GN=PSMC2 PE=1 SV=3
Q9BSJ8	32	22	22		4237300	819390	33792000	69290000	144000000	41300000	122856	Extended synaptotagmin-1 OS=Homo sapiens OX=9606 GN=ESYT1 PE=1 SV=1
P26373	56	20	20	Oxidation (M)	17871000	75947000	216660000	295030000	701000000	436000000	24261	60S ribosomal protein L13 OS=Homo sapiens OX=9606 GN=RPL13 PE=1 SV=4
P55084	57	25	25		12073000	16594000	138130000	412580000	270000000	20000000	51294	Trifunctional enzyme subunit beta mitochondrial OS=Homo sapiens OX=9606 GN=HADHB PE=1 SV=3
Q9Y285	49	16	16	Acetylation (Protein N-term)	1899800	5745300	16213000	24803000	174000000	14100000	57564	Phenylalanine--tRNA ligase alpha subunit OS=Homo sapiens OX=9606 GN=FARSA PE=1 SV=3
Q96DI7	36	9	9		369870	3520500	16694000	17280000	76700000	21400000	39311	U5 small nuclear ribonucleoprotein 40 kDa protein OS=Homo sapiens OX=9606 GN=SNRNP40 PE=1 SV=1
P63104	68	24	17	Carbamidomethylation; Oxidation (M); Acetylation (Protein N-term)	3606900	20273000	193640000	354700000	1770000000	69200000	27745	14-3-3 protein zeta/delta OS=Homo sapiens OX=9606 GN=YWHAZ PE=1 SV=1
P53396	35	28	28	Carbamidomethylation; Oxidation (M)	10947000	25361000	70582000	133180000	750000000	95500000	120839	ATP-citrate synthase OS=Homo sapiens OX=9606 GN=ACLY PE=1 SV=3
P06744	49	17	17	Acetylation (Protein N-term)	6097100	2595700	16672000	18681000	238000000	16300000	63147	Glucose-6-phosphate isomerase OS=Homo sapiens OX=9606 GN=GPI PE=1 SV=4
Q02880	25	32	18	Carbamidomethylation	4646800	3279700	46870000	91994000	188000000	14200000	183266	DNA topoisomerase 2-beta OS=Homo sapiens OX=9606 GN=TOP2B PE=1 SV=3
Q9NSE4	23	16	16		0	5347000	47140000	71571000	207000000	10100000	113791	Isoleucine--tRNA ligase mitochondrial OS=Homo sapiens OX=9606 GN=IARS2 PE=1 SV=2
P41091	45	14	14	Carbamidomethylation; Acetylation (Protein N-term)	4115600	12276000	61970000	124330000	590000000	29400000	51110	Eukaryotic translation initiation factor 2 subunit 3 OS=Homo sapiens OX=9606 GN=EIF2S3 PE=1 SV=3
O00425	45	24	17	Carbamidomethylation	10428000	9075200	260350000	40214000	243000000	287000000	63705	Insulin-like growth factor 2 mRNA-binding protein 3 OS=Homo sapiens OX=9606 GN=IGF2BP3 PE=1 SV=2
P38159	47	27	6	Acetylation (Protein N-term)	0	0	23403000	57619000	568000000	41100000	42332	RNA-binding motif protein X chromosome OS=Homo sapiens OX=9606 GN=RBMX PE=1 SV=3
O00159	25	18	17		1653900	3509100	18879000	44760000	149000000	4080000	121682	Unconventional myosin-Ic OS=Homo sapiens OX=9606 GN=MYO1C PE=1 SV=4
P17980	59	23	23	Acetylation (Protein N-term)	167270000	458720000	193530000	183830000	380000000	31200000	49204	26S proteasome regulatory subunit 6A OS=Homo sapiens OX=9606 GN=PSMC3 PE=1 SV=3
P28331	34	19	19		1249700	3609400	27588000	68212000	156000000	13900000	79468	NADH-ubiquinone oxidoreductase 75 kDa subunit mitochondrial OS=Homo sapiens OX=9606 GN=NDUFS1 PE=1 SV=3
O00410	27	22	19	Acetylation (Protein N-term)	635700	2768400	15698000	20092000	305000000	13100000	123630	Importin-5 OS=Homo sapiens OX=9606 GN=IPO5 PE=1 SV=4
Q7L2E3	28	21	21	Carbamidomethylation	10908000	6289300	46570000	120070000	978000000	62300000	133938	ATP-dependent RNA helicase DHX30 OS=Homo sapiens OX=9606 GN=DHX30 PE=1 SV=1
P38606	36	16	16	Carbamidomethylation	1627500	8748900	26281000	41253000	159000000	9300000	68304	V-type proton ATPase catalytic subunit A OS=Homo sapiens OX=9606 GN=ATP6V1A PE=1 SV=2
P46783	64	13	12		101740000	38837000	44644000	86312000	421000000	23100000	18898	40S ribosomal protein S10 OS=Homo sapiens OX=9606 GN=RPS10 PE=1 SV=1
P25398	77	16	16	Carbamidomethylation; Oxidation (M); Acetylation (Protein N-term)	35147000	18834000	76737000	140280000	311000000	61700000	14515	40S ribosomal protein S12 OS=Homo sapiens OX=9606 GN=RPS12 PE=1 SV=3
Q9BXP5	25	18	18	Carbamidomethylation	9609300	4702500	27964000	86999000	219000000	24000000	100667	Serrate RNA effector molecule homolog OS=Homo sapiens OX=9606 GN=SRRT PE=1 SV=1
P24752	51	16	16	Carbamidomethylation	43697000	7756600	20335000	38125000	109000000	5590000	45200	Acetyl-CoA acetyltransferase mitochondrial OS=Homo sapiens OX=9606 GN=ACAT1 PE=1 SV=1
Q13501	51	11	11	Carbamidomethylation	356710	6705400	27325000	39029000	80500000	6450000	47687	Sequestosome-1 OS=Homo sapiens OX=9606 GN=SQSTM1 PE=1 SV=1
Q99623	57	16	16		626440	8028200	66513000	165150000	900000000	66600000	33296	Prohibitin-2 OS=Homo sapiens OX=9606 GN=PHB2 PE=1 SV=2
Q9UHX1	50	16	16	Carbamidomethylation; Oxidation (M); Acetylation (Protein N-term)	4314600	12523000	41482000	57593000	257000000	33300000	59876	Poly(U)-binding-splicing factor PUF60 OS=Homo sapiens OX=9606 GN=PUF60 PE=1 SV=1
P62241	54	28	28	Carbamidomethylation	86407000	161180000	291920000	444290000	1130000000	64500000	24205	40S ribosomal protein S8 OS=Homo sapiens OX=9606 GN=RPS8 PE=1 SV=2
P27105	65	17	17	Oxidation (M)	16696000	22650000	44821000	48937000	121000000	7390000	31731	Stomatin OS=Homo sapiens OX=9606 GN=STOM PE=1 SV=3
Q14683	35	34	34	Carbamidomethylation	27690000	32866000	82569000	138050000	163000000	24100000	143233	Structural maintenance of chromosomes protein 1A OS=Homo sapiens OX=9606 GN=SMC1A PE=1 SV=2
O95782	22	15	12		743100	9691000	35725000	67997000	82000000	8710000	107546	AP-2 complex subunit alpha-1 OS=Homo sapiens OX=9606 GN=AP2A1 PE=1 SV=3
Q13123	36	14	14	Carbamidomethylation	117190	5533500	11689000	20287000	22400000	2960000	65602	Protein Red OS=Homo sapiens OX=9606 GN=IK PE=1 SV=3
Q9UJS0	37	16	13		14281000	34739000	71650000	6018200	338000000	46900000	74176	Calcium-binding mitochondrial carrier protein Aralar2 OS=Homo sapiens OX=9606 GN=SLC25A13 PE=1 SV=2
Q9NVI7	33	15	8		0	0	7375500	12028000	54800000	9350000	71369	ATPase family AAA domain-containing protein 3A OS=Homo sapiens OX=9606 GN=ATAD3A PE=1 SV=2
O00116	45	21	21		29302000	99627000	52370000	1708400000	276000000	220000000	72912	Alkyldihydroxyacetonephosphate synthase peroxisomal OS=Homo sapiens OX=9606 GN=AGPS PE=1 SV=1
Q86XP3	35	16	16	Carbamidomethylation	8424600	10138000	22687000	32871000	68900000	110000000	102975	ATP-dependent RNA helicase DDX42 OS=Homo sapiens OX=9606 GN=DDX42 PE=1 SV=1
O43399	70	14	14	Oxidation (M); Acetylation (Protein N-term)	13882000	18892000	59175000	79714000	165000000	11700000	22238	Tumor protein D54 OS=Homo sapiens OX=9606 GN=TPD52L2 PE=1 SV=2
P50402	73	15	15	Carbamidomethylation; Acetylation (Protein N-term)	25570	2579300	24857000	29854000	105000000	20400000	28994	Emerin OS=Homo sapiens OX=9606 GN=EMD PE=1 SV=1
Q16555	37	17	13	Carbamidomethylation	9804300	8089100	37740000	69424000	388000000	26800000	62294	Dihydropyrimidinase-related protein 2 OS=Homo sapiens OX=9606 GN=DPYSL2 PE=1 SV=1
Q14137	29	12	12	Carbamidomethylation	784420	4132200	12038000	20632000	131000000	6750000	83630	Ribosome biogenesis protein BOP1 OS=Homo sapiens OX=9606 GN=BOP1 PE=1 SV=2
P11387	37	29	29	Carbamidomethylation; Acetylation (Protein N-term)	2717900	12209000	53034000	132520000	303000000	21900000	90726	DNA topoisomerase 1 OS=Homo sapiens OX=9606 GN=TOP1 PE=1 SV=2
Q9BY44	39	16	16		8580600	24540000	30756000	48632000	266000000	25200000	64990	Eukaryotic translation initiation factor 2A OS=Homo sapiens OX=9606 GN=EIF2A PE=1 SV=3
P40926	53	14	14	Carbamidomethylation	4901100	6165200	14758000	26597000	470000000	63000000	35503	Malate dehydrogenase mitochondrial OS=Homo sapiens OX=9606 GN=MDH2 PE=1 SV=3
P07737	79	19	19	Carbamidomethylation	5496500	24074000	242130000	668500000	3790000000	231000000	15054	Profilin-1 OS=Homo sapiens OX=9606 GN=PFN1 PE=1 SV=2
P61163	47	13	7	Carbamidomethylation; Acetylation (Protein N-term)	1957000	0	37168000	70036000	72100000	1730000	42614	Alpha-centractin OS=Homo sapiens OX=9606 GN=ACTR1A PE=1 SV=1
P06753	43	20	7	Oxidation (M)	48194000	81025000	71459000	95903000	287000000	24500000	32950	Tropomyosin alpha-3 chain OS=Homo sapiens OX=9606 GN=TPM3 PE=1 SV=2
P30048	49	14	13	Carbamidomethylation	380710	20589000	56352000	75488000	126000000	30700000	27693	Thioredoxin-dependent peroxide reductase mitochondrial OS=Homo sapiens OX=9606 GN=PRDX3 PE=1 SV=3
Q96KR1	34	20	20		1531700	1097300	23900000	38653000	164000000	7920000	117012	Zinc finger RNA-binding protein OS=Homo sapiens OX=9606 GN=ZFR PE=1 SV=2
O60313	25	18	18		10065000	6084200	76765000	99326000	592000000	88200000	111630	Dynamin-like 120 kDa protein mitochondrial OS=Homo sapiens OX=9606 GN=OPA1 PE=1 SV=3
P54886	39	24	24		3909900	15175000	27235000	102490000	160000000	15400000	87302	Delta-1-pyrroline-5-carboxylate synthase OS=Homo sapiens OX=9606 GN=ALDH18A1 PE=1 SV=2
P05141	50	20	6	Carbamidomethylation; Acetylation (Protein N-term)	129930	2146800	9045400	14470000	105000000	5170000	32852	ADP/ATP translocase 2 OS=Homo sapiens OX=9606 GN=SLC25A5 PE=1 SV=7
Q13838	40	25	14	Carbamidomethylation; Acetylation (Protein N-term)	18691000	2381600	58175000	57206000	298000000	9780000	48991	Spliceosome RNA helicase DDX39B OS=Homo sapiens OX=9606 GN=DDX39B PE=1 SV=1
O60568	45	22	22	Oxidation (M)	1635200	2124000	41246000	84358000	65100000	12000000	84785	Multifunctional procollagen lysine hydroxylase and glycosyltransferase LH3 OS=Homo sapiens OX=9606 GN=PLOD3 PE=1 SV=1
Q13442	40	12	12		12869000	16172000	65636000	36591000	172000000	10200000	20630	28 kDa heat- and acid-stable phosphoprotein OS=Homo sapiens OX=9606 GN=PDAP1 PE=1 SV=1
P05114	68	12	12	Acetylation (Protein N-term)	2600000	6462600	41378000	62819000	47700000	2570000	10659	Non-histone chromosomal protein HMG-14 OS=Homo sapiens OX=9606 GN=HMGN1 PE=1 SV=3
Q9HB71	58	16	16	Oxidation (M); Acetylation (Protein N-term)	8905700	17316000	82091000	123660000	755000000	21600000	26210	Calcyclin-binding protein OS=Homo sapiens OX=9606 GN=CACYBP PE=1 SV=2
Q13011	50	13	13		0	1674800	63509000	31673000	156000000	6420000	35816	Delta(3 5)-Delta(2 4)-dienoyl-CoA isomerase mitochondrial OS=Homo sapiens OX=9606 GN=ECH1 PE=1 SV=2
Q92797	20	12	12		27733	2356200	20190000	18392000	52100000	4930000	141148	Symplekin OS=Homo sapiens OX=9606 GN=SYMPK PE=1 SV=2
Q9BWD1	51	16	16	Carbamidomethylation; Oxidation (M); Acetylation (Protein N-term)	4380400	4383300	44913000	42557000	55000000	431000000	41351	Acetyl-CoA acetyltransferase cytosolic OS=Homo sapiens OX=9606 GN=ACAT2 PE=1 SV=2
Q92973	28	19	19	Carbamidomethylation; Acetylation (Protein N-term)	55189	2538800	22964000	39031000	293000000	6000000	102355	Transportin-1 OS=Homo sapiens OX=9606 GN=TNPO1 PE=1 SV=2
Q9Y224	59	13	13		274900	16008000	15779000	31459000	124000000	9160000	28068	RNA transcription translation and transport factor protein OS=Homo sapiens OX=9606 GN=RTRAF PE=1 SV=1
Q15021	19	18	18	Carbamidomethylation	5295600	3541200	28475000	25047000	192000000	58800000	157182	Condensin complex subunit 1 OS=Homo sapiens OX=9606 GN=NCAPD2 PE=1 SV=3
Q9UN86	35	16	13	Acetylation (Protein N-term)	1357100	10170000	16626000	47348000	109000000	7780000	54121	Ras GTPase-activating protein-binding protein 2 OS=Homo sapiens OX=9606 GN=G3BP2 PE=1 SV=2
O75955	56	18	18		999210	11254000	131100000	283670000	404000000	33100000	47355	Flotillin-1 OS=Homo sapiens OX=9606 GN=FLOT1 PE=1 SV=3
P09012	42	10	9	Oxidation (M); Acetylation (Protein N-term)	19204000	9022400	67220000	56024000	264000000	7280000	31280	U1 small nuclear ribonucleoprotein A OS=Homo sapiens OX=9606 GN=SNRPA PE=1 SV=3
P62258	75	25	23	Carbamidomethylation; Oxidation (M); Acetylation (Protein N-term)	10630000	17122000	225010000	371780000	1600000000	112000000	29174	14-3-3 protein epsilon OS=Homo sapiens OX=9606 GN=YWHAE PE=1 SV=1
P26196	44	12	12		1273200	1241100	20506000	38980000	103000000	15600000	54417	Probable ATP-dependent RNA helicase DDX6 OS=Homo sapiens OX=9606 GN=DDX6 PE=1 SV=2
Q7L2J0	28	10	10	Carbamidomethylation	1030600	502120	4915000	12054000	61100000	2360000	74355	7SK snRNA methylphosphate capping enzyme OS=Homo sapiens OX=9606 GN=MEPCE PE=1 SV=1
P61106	65	15	12		5984000	5312300	26513000	67535000	677000000	68300000	23897	Ras-related protein Rab-14 OS=Homo sapiens OX=9606 GN=RAB14 PE=1 SV=4
Q9Y262	33	15	15	Carbamidomethylation	42413	7894300	50221000	57848000	231000000	11800000	66727	Eukaryotic translation initiation factor 3 subunit L OS=Homo sapiens OX=9606 GN=EIF3L PE=1 SV=1
P04908	58	27	5		607660	3769200	44223000	110880000	26500000	1190000	14135	Histone H2A type 1-B/E OS=Homo sapiens OX=9606 GN=H2AC4 PE=1 SV=2
Q7L7L0	58	27	5		607660	3769200	44223000	110880000	26500000	1190000	14121	Histone H2A type 3 OS=Homo sapiens OX=9606 GN=H2AW PE=1 SV=3
Q93077	58	27	5		607660	3769200	44223000	110880000	26500000	1190000	14105	Histone H2A type 1-C OS=Homo sapiens OX=9606 GN=H2AC6 PE=1 SV=3
P42330	43	12	4	Carbamidomethylation; Oxidation (M)	264490	26518	36402000	30995000	460000000	12300000	36853	Aldo-keto reductase family 1 member C3 OS=Homo sapiens OX=9606 GN=AKR1C3 PE=1 SV=4
P35241	47	26	12	Oxidation (M)	12039000	10646000	37890000	53245000	178000000	50100000	68564	Radixin OS=Homo sapiens OX=9606 GN=RDX PE=1 SV=1
P23381	52	17	17	Carbamidomethylation	918890	7634500	45989000	66051000	151000000	5460000	53165	Tryptophan--tRNA ligase cytoplasmic OS=Homo sapiens OX=9606 GN=WARS1 PE=1 SV=2
P61204	64	13	8		4664100	12229000	23226000	54471000	458000000	19700000	20601	ADP-ribosylation factor 3 OS=Homo sapiens OX=9606 GN=ARF3 PE=1 SV=2
P84077	64	13	8		4664100	12229000	23226000	54471000	458000000	19700000	20697	ADP-ribosylation factor 1 OS=Homo sapiens OX=9606 GN=ARF1 PE=1 SV=2
P43121	32	16	16	Carbamidomethylation	2405700	14151000	29146000	37140000	82400000	3710000	71608	Cell surface glycoprotein MUC18 OS=Homo sapiens OX=9606 GN=MCAM PE=1 SV=2
P23588	33	21	21	Carbamidomethylation	12400000	32442000	62750000	93557000	240000000	12700000	69151	Eukaryotic translation initiation factor 4B OS=Homo sapiens OX=9606 GN=EIF4B PE=1 SV=2
P47897	25	15	15		3443200	12702000	23736000	57175000	286000000	17600000	87799	Glutamine--tRNA ligase OS=Homo sapiens OX=9606 GN=QARS1 PE=1 SV=1
P27348	72	23	13	Carbamidomethylation	833190	18344000	148940000	224070000	764000000	37300000	27764	14-3-3 protein theta OS=Homo sapiens OX=9606 GN=YWHAQ PE=1 SV=1
Q8N766	30	17	17		2532800	13855000	48577000	32516000	103000000	4210000	111759	ER membrane protein complex subunit 1 OS=Homo sapiens OX=9606 GN=EMC1 PE=1 SV=1
Q8TDN6	59	14	14	Carbamidomethylation	18078000	10270000	59547000	47796000	236000000	41700000	41401	Ribosome biogenesis protein BRX1 homolog OS=Homo sapiens OX=9606 GN=BRIX1 PE=1 SV=2
O95831	34	15	15		2378700	9124600	31862000	80594000	212000000	51100000	66901	Apoptosis-inducing factor 1 mitochondrial OS=Homo sapiens OX=9606 GN=AIFM1 PE=1 SV=1
Q9NYF8	32	25	24	Carbamidomethylation	3217600	14481000	49092000	90159000	95400000	19700000	106122	Bcl-2-associated transcription factor 1 OS=Homo sapiens OX=9606 GN=BCLAF1 PE=1 SV=2
Q07666	30	14	14		24133000	19674000	129660000	207500000	233000000	11300000	48227	KH domain-containing RNA-binding signal transduction-associated protein 1 OS=Homo sapiens OX=9606 GN=KHDRBS1 PE=1 SV=1
P63220	58	11	11	Oxidation (M); Acetylation (Protein N-term)	37413000	18282000	82896000	145300000	457000000	16800000	9111	40S ribosomal protein S21 OS=Homo sapiens OX=9606 GN=RPS21 PE=1 SV=1
Q8TCS8	31	19	19		3881900	867510	19284000	23818000	85800000	2160000	85951	Polyribonucleotide nucleotidyltransferase 1 mitochondrial OS=Homo sapiens OX=9606 GN=PNPT1 PE=1 SV=2
Q9NTK5	54	16	16	Carbamidomethylation	1218500	10585000	67384000	57710000	194000000	16700000	44744	Obg-like ATPase 1 OS=Homo sapiens OX=9606 GN=OLA1 PE=1 SV=2
P18124	56	34	34	Carbamidomethylation; Acetylation (Protein N-term)	40198000	148310000	245380000	446020000	1090000000	68200000	29226	60S ribosomal protein L7 OS=Homo sapiens OX=9606 GN=RPL7 PE=1 SV=1
Q13423	28	17	17		18721000	7850600	60483000	53313000	177000000	53200000	113895	NAD(P) transhydrogenase mitochondrial OS=Homo sapiens OX=9606 GN=NNT PE=1 SV=3
P06454	46	11	11	Acetylation (Protein N-term)	431220000	239120000	622670000	443560000	1560000000	34300000	12203	Prothymosin alpha OS=Homo sapiens OX=9606 GN=PTMA PE=1 SV=2
Q9UKS6	41	16	16	Carbamidomethylation	6442000	21114000	49784000	66332000	143000000	3340000	48487	Protein kinase C and casein kinase substrate in neurons protein 3 OS=Homo sapiens OX=9606 GN=PACSIN3 PE=1 SV=2
P09960	31	14	14		5827800	7854800	76331000	181310000	176000000	97000000	69285	Leukotriene A-4 hydrolase OS=Homo sapiens OX=9606 GN=LTA4H PE=1 SV=2
Q07020	43	20	20	Carbamidomethylation	26575000	59155000	168930000	290960000	1020000000	74200000	21634	60S ribosomal protein L18 OS=Homo sapiens OX=9606 GN=RPL18 PE=1 SV=2
Q8IVF2	5	16	16		232940	6187500	39652000	70632000	99900000	5460000	616641	Protein AHNAK2 OS=Homo sapiens OX=9606 GN=AHNAK2 PE=1 SV=2
P10321	33	11	4	Carbamidomethylation	2449800	3597300	6466400	7944200	9680000	301000	40649	HLA class I histocompatibility antigen C alpha chain OS=Homo sapiens OX=9606 GN=HLA-C PE=1 SV=3
P39748	47	19	19	Carbamidomethylation; Oxidation (M)	15744000	9746600	74673000	96942000	385000000	24500000	42593	Flap endonuclease 1 OS=Homo sapiens OX=9606 GN=FEN1 PE=1 SV=1
P35613	23	7	7	Carbamidomethylation	1201500	12275000	35616000	69630000	596000000	44900000	42200	Basigin OS=Homo sapiens OX=9606 GN=BSG PE=1 SV=2
O75683	34	9	9	Carbamidomethylation; Acetylation (Protein N-term)	15552000	20005000	56340000	124340000	29400000	1860000	41450	Surfeit locus protein 6 OS=Homo sapiens OX=9606 GN=SURF6 PE=1 SV=3
P19784	43	12	12		12031000	52765000	71452000	104890000	45400000	522000	41213	Casein kinase II subunit alpha' OS=Homo sapiens OX=9606 GN=CSNK2A2 PE=1 SV=1
Q15691	66	15	15	Carbamidomethylation; Oxidation (M); Acetylation (Protein N-term)	15081000	11624000	72168000	133500000	289000000	18300000	29999	Microtubule-associated protein RP/EB family member 1 OS=Homo sapiens OX=9606 GN=MAPRE1 PE=1 SV=3
P14868	48	17	17	Carbamidomethylation	8507700	6084300	85088000	138860000	341000000	10300000	57136	Aspartate--tRNA ligase cytoplasmic OS=Homo sapiens OX=9606 GN=DARS1 PE=1 SV=2
P12004	64	16	16	Carbamidomethylation	112160	8421000	94898000	221910000	555000000	10300000	28769	Proliferating cell nuclear antigen OS=Homo sapiens OX=9606 GN=PCNA PE=1 SV=1
Q99733	42	13	12	Oxidation (M); Acetylation (Protein N-term)	23279000	21933000	53633000	70045000	133000000	5760000	42823	Nucleosome assembly protein 1-like 4 OS=Homo sapiens OX=9606 GN=NAP1L4 PE=1 SV=1
Q5QJE6	30	17	17	Carbamidomethylation	15249000	7009100	14196000	21632000	177000000	22000000	84469	Deoxynucleotidyltransferase terminal-interacting protein 2 OS=Homo sapiens OX=9606 GN=DNTTIP2 PE=1 SV=2
P78344	32	19	19	Acetylation (Protein N-term)	6723500	5532100	19634000	42358000	130000000	7660000	102362	Eukaryotic translation initiation factor 4 gamma 2 OS=Homo sapiens OX=9606 GN=EIF4G2 PE=1 SV=1
P61313	43	14	14		1068100	22306000	110210000	230250000	671000000	23600000	24146	60S ribosomal protein L15 OS=Homo sapiens OX=9606 GN=RPL15 PE=1 SV=2
Q5VYK3	17	18	18	Carbamidomethylation; Acetylation (Protein N-term)	5494300	1977100	11754000	24798000	66900000	11100000	204289	Proteasome adapter and scaffold protein ECM29 OS=Homo sapiens OX=9606 GN=ECPAS PE=1 SV=2
P35606	29	18	18	Carbamidomethylation	0	1755000	14090000	28672000	338000000	19000000	102487	Coatomer subunit beta' OS=Homo sapiens OX=9606 GN=COPB2 PE=1 SV=2
P46777	30	19	19	Oxidation (M)	4674800	18344000	136670000	230310000	1160000000	59400000	34363	60S ribosomal protein L5 OS=Homo sapiens OX=9606 GN=RPL5 PE=1 SV=3
P12236	46	20	3	Carbamidomethylation; Oxidation (M); Acetylation (Protein N-term)	226280	2370400	23092000	32595000	92700000	3560000	32866	ADP/ATP translocase 3 OS=Homo sapiens OX=9606 GN=SLC25A6 PE=1 SV=4
Q15293	60	14	14		11708000	5826000	8131700	12925000	374000000	9170000	38890	Reticulocalbin-1 OS=Homo sapiens OX=9606 GN=RCN1 PE=1 SV=1
P51148	62	15	9		2042000	5149500	8911100	15575000	63200000	4010000	23483	Ras-related protein Rab-5C OS=Homo sapiens OX=9606 GN=RAB5C PE=1 SV=2
P60228	37	16	16	Oxidation (M)	12238000	10945000	36518000	77045000	181000000	21700000	52221	Eukaryotic translation initiation factor 3 subunit E OS=Homo sapiens OX=9606 GN=EIF3E PE=1 SV=1
P15880	61	22	22	Carbamidomethylation; Acetylation (Protein N-term)	97765000	34953000	130760000	243020000	1080000000	156000000	31324	40S ribosomal protein S2 OS=Homo sapiens OX=9606 GN=RPS2 PE=1 SV=2
O76070	82	13	13		7961000	27717000	65164000	87321000	0	3220000	13331	Gamma-synuclein OS=Homo sapiens OX=9606 GN=SNCG PE=1 SV=2
O43684	45	11	11	Carbamidomethylation	14017000	3109000	30779000	165390000	168000000	12900000	37155	Mitotic checkpoint protein BUB3 OS=Homo sapiens OX=9606 GN=BUB3 PE=1 SV=1
Q01518	47	18	18	Carbamidomethylation; Acetylation (Protein N-term)	2278700	6889300	28387000	35845000	373000000	39700000	51902	Adenylyl cyclase-associated protein 1 OS=Homo sapiens OX=9606 GN=CAP1 PE=1 SV=5
P08621	43	20	20		9533100	25888000	72593000	145110000	253000000	9600000	51557	U1 small nuclear ribonucleoprotein 70 kDa OS=Homo sapiens OX=9606 GN=SNRNP70 PE=1 SV=2
Q9H6F5	35	8	8	Carbamidomethylation	6779700	2101700	68338000	24164000	33800000	3880000	40236	Coiled-coil domain-containing protein 86 OS=Homo sapiens OX=9606 GN=CCDC86 PE=1 SV=1
P51149	69	14	13		1393400	4480300	31040000	60108000	581000000	70900000	23490	Ras-related protein Rab-7a OS=Homo sapiens OX=9606 GN=RAB7A PE=1 SV=1
P16070	11	11	11		10371000	19731000	42572000	64688000	620000000	30100000	81538	CD44 antigen OS=Homo sapiens OX=9606 GN=CD44 PE=1 SV=3
P08708	61	12	12	Carbamidomethylation; Oxidation (M)	9238600	14731000	69578000	65956000	540000000	37700000	15550	40S ribosomal protein S17 OS=Homo sapiens OX=9606 GN=RPS17 PE=1 SV=2
Q96S52	42	12	12		7249400	4302700	18269000	34814000	66000000	1100000	61656	GPI transamidase component PIG-S OS=Homo sapiens OX=9606 GN=PIGS PE=1 SV=3
Q9Y3F4	57	18	18	Carbamidomethylation	7260000	21475000	59789000	110120000	361000000	19200000	38438	Serine-threonine kinase receptor-associated protein OS=Homo sapiens OX=9606 GN=STRAP PE=1 SV=1
P84103	41	13	11		13219000	97866000	69548000	110410000	219000000	11800000	19330	Serine/arginine-rich splicing factor 3 OS=Homo sapiens OX=9606 GN=SRSF3 PE=1 SV=1
Q9H0U4	69	13	5	Oxidation (M); Acetylation (Protein N-term)	0	3867200	12084000	20334000	114000000	10700000	22171	Ras-related protein Rab-1B OS=Homo sapiens OX=9606 GN=RAB1B PE=1 SV=1
P49419	38	14	14	Carbamidomethylation	3353900	11641000	24211000	37926000	37000000	2020000	58487	Alpha-aminoadipic semialdehyde dehydrogenase OS=Homo sapiens OX=9606 GN=ALDH7A1 PE=1 SV=5
P49591	44	17	17	Carbamidomethylation	0	1516800	28000000	52851000	231000000	81400000	58777	Serine--tRNA ligase cytoplasmic OS=Homo sapiens OX=9606 GN=SARS1 PE=1 SV=3
P18621	51	16	16	Carbamidomethylation; Oxidation (M)	21690000	33926000	135670000	219810000	1290000000	130000000	21397	60S ribosomal protein L17 OS=Homo sapiens OX=9606 GN=RPL17 PE=1 SV=3
Q15050	45	21	21	Carbamidomethylation; Oxidation (M); Acetylation (Protein N-term)	5322800	18062000	18389000	43293000	213000000	50900000	41193	Ribosome biogenesis regulatory protein homolog OS=Homo sapiens OX=9606 GN=RRS1 PE=1 SV=2
P27635	41	19	19	Carbamidomethylation; Oxidation (M)	72156000	39168000	133390000	186410000	499000000	22700000	24604	60S ribosomal protein L10 OS=Homo sapiens OX=9606 GN=RPL10 PE=1 SV=4
Q96SI9	22	13	8		780420	6854800	16793000	54844000	235000000	12700000	73653	Spermatid perinuclear RNA-binding protein OS=Homo sapiens OX=9606 GN=STRBP PE=1 SV=1
P37802	77	19	19	Carbamidomethylation; Oxidation (M); Acetylation (Protein N-term)	38059000	39484000	149280000	193250000	1750000000	96800000	22391	Transgelin-2 OS=Homo sapiens OX=9606 GN=TAGLN2 PE=1 SV=3
Q86V81	49	15	15	Oxidation (M); Acetylation (Protein N-term)	2026600	1964800	71133000	81771000	296000000	8340000	26888	THO complex subunit 4 OS=Homo sapiens OX=9606 GN=ALYREF PE=1 SV=3
P52907	66	15	13	Carbamidomethylation; Acetylation (Protein N-term)	8848600	3484600	24215000	59117000	397000000	14900000	32923	F-actin-capping protein subunit alpha-1 OS=Homo sapiens OX=9606 GN=CAPZA1 PE=1 SV=3
Q9UKY7	78	10	10	Acetylation (Protein N-term)	34771000	7274900	83495000	101830000	228000000	5490000	27335	Protein CDV3 homolog OS=Homo sapiens OX=9606 GN=CDV3 PE=1 SV=1
O15371	29	10	10	Carbamidomethylation	4428600	5331600	17601000	19745000	199000000	44700000	63973	Eukaryotic translation initiation factor 3 subunit D OS=Homo sapiens OX=9606 GN=EIF3D PE=1 SV=1
Q03252	42	19	17		25496000	19133000	42049000	147970000	271000000	17600000	69948	Lamin-B2 OS=Homo sapiens OX=9606 GN=LMNB2 PE=1 SV=4
O95163	25	16	16		582470	826700	9262800	11923000	31200000	2740000	150254	Elongator complex protein 1 OS=Homo sapiens OX=9606 GN=ELP1 PE=1 SV=3
Q96T88	31	17	17		272550	2008000	25325000	39581000	74400000	23300000	89814	E3 ubiquitin-protein ligase UHRF1 OS=Homo sapiens OX=9606 GN=UHRF1 PE=1 SV=1
O95202	30	16	16		103580	7569200	55054000	74504000	347000000	22000000	83354	Mitochondrial proton/calcium exchanger protein OS=Homo sapiens OX=9606 GN=LETM1 PE=1 SV=1
O94874	30	17	17		2495600	7270500	45914000	69343000	249000000	4200000	89595	E3 UFM1-protein ligase 1 OS=Homo sapiens OX=9606 GN=UFL1 PE=1 SV=2
P62244	62	13	13	Carbamidomethylation; Oxidation (M)	4180900	2354100	29943000	65159000	804000000	62400000	14840	40S ribosomal protein S15a OS=Homo sapiens OX=9606 GN=RPS15A PE=1 SV=2
O75874	36	14	14		10530000	13203000	73091000	106040000	71000000	2850000	46659	Isocitrate dehydrogenase [NADP] cytoplasmic OS=Homo sapiens OX=9606 GN=IDH1 PE=1 SV=2
P11177	45	14	14	Carbamidomethylation	14821000	16013000	20802000	37908000	108000000	5100000	39233	Pyruvate dehydrogenase E1 component subunit beta mitochondrial OS=Homo sapiens OX=9606 GN=PDHB PE=1 SV=3
P62277	48	21	21		1905000	21512000	142150000	191780000	605000000	20800000	17222	40S ribosomal protein S13 OS=Homo sapiens OX=9606 GN=RPS13 PE=1 SV=2
Q96HY6	52	11	11		989900	3758100	34596000	15760000	63400000	9080000	35611	DDRGK domain-containing protein 1 OS=Homo sapiens OX=9606 GN=DDRGK1 PE=1 SV=2
Q13155	39	8	8	Carbamidomethylation	4457300	6705900	12750000	20527000	93100000	2820000	35349	Aminoacyl tRNA synthase complex-interacting multifunctional protein 2 OS=Homo sapiens OX=9606 GN=AIMP2 PE=1 SV=2
O00264	40	7	7		865190	2353200	6238600	14298000	31000000	6940000	21671	Membrane-associated progesterone receptor component 1 OS=Homo sapiens OX=9606 GN=PGRMC1 PE=1 SV=3
P53992	20	13	13	Carbamidomethylation	3876900	9485400	40091000	17316000	142000000	5140000	118325	Protein transport protein Sec24C OS=Homo sapiens OX=9606 GN=SEC24C PE=1 SV=3
Q12907	48	11	11		1769200	2449800	238490000	69232000	83000000	14100000	40229	Vesicular integral-membrane protein VIP36 OS=Homo sapiens OX=9606 GN=LMAN2 PE=1 SV=1
Q06210	34	15	15	Carbamidomethylation	91671	1386900	5508500	19293000	289000000	14700000	78806	Glutamine--fructose-6-phosphate aminotransferase [isomerizing] 1 OS=Homo sapiens OX=9606 GN=GFPT1 PE=1 SV=3
Q12797	32	18	18		77082000	144360000	20836000	28222000	143000000	4670000	85863	Aspartyl/asparaginyl beta-hydroxylase OS=Homo sapiens OX=9606 GN=ASPH PE=1 SV=3
Q8WTT2	19	14	14		107010	51790	3361900	5405200	72100000	32100000	92548	Nucleolar complex protein 3 homolog OS=Homo sapiens OX=9606 GN=NOC3L PE=1 SV=1
P15170	44	15	7	Carbamidomethylation	0	1114300	16830000	15978000	187000000	4680000	55756	Eukaryotic peptide chain release factor GTP-binding subunit ERF3A OS=Homo sapiens OX=9606 GN=GSPT1 PE=1 SV=1
Q15165	52	9	9		617110	0	3293900	53774000	87800000	5070000	39381	Serum paraoxonase/arylesterase 2 OS=Homo sapiens OX=9606 GN=PON2 PE=1 SV=4
P05556	20	16	16		5062600	14058000	72509000	85222000	543000000	44100000	88415	Integrin beta-1 OS=Homo sapiens OX=9606 GN=ITGB1 PE=1 SV=2
Q8TED0	29	9	9	Acetylation (Protein N-term)	0	43056	13560000	25250000	37400000	4940000	58415	U3 small nucleolar RNA-associated protein 15 homolog OS=Homo sapiens OX=9606 GN=UTP15 PE=1 SV=3
O14745	47	12	12	Carbamidomethylation; Acetylation (Protein N-term)	9070600	23782000	40904000	71720000	182000000	6650000	38868	Na(+)/H(+) exchange regulatory cofactor NHE-RF1 OS=Homo sapiens OX=9606 GN=SLC9A3R1 PE=1 SV=4
O95433	51	10	10	Carbamidomethylation	101680	2616200	19792000	26994000	226000000	50700000	38274	Activator of 90 kDa heat shock protein ATPase homolog 1 OS=Homo sapiens OX=9606 GN=AHSA1 PE=1 SV=1
P43487	68	13	13	Carbamidomethylation; Acetylation (Protein N-term)	20944000	41200000	201700000	288960000	698000000	50500000	23310	Ran-specific GTPase-activating protein OS=Homo sapiens OX=9606 GN=RANBP1 PE=1 SV=1
P54578	34	13	13	Carbamidomethylation	460180	2896100	17769000	37994000	157000000	12500000	56069	Ubiquitin carboxyl-terminal hydrolase 14 OS=Homo sapiens OX=9606 GN=USP14 PE=1 SV=3
Q01780	33	17	17	Carbamidomethylation	3044700	1176200	16226000	27937000	22000000	834000	100831	Exosome component 10 OS=Homo sapiens OX=9606 GN=EXOSC10 PE=1 SV=2
P61289	67	11	11	Carbamidomethylation; Acetylation (Protein N-term)	1584600	6354300	20541000	35223000	190000000	16600000	29506	Proteasome activator complex subunit 3 OS=Homo sapiens OX=9606 GN=PSME3 PE=1 SV=1
P50416	23	11	11	Acetylation (Protein N-term)	1201400	4772500	29096000	23709000	43800000	2560000	88368	Carnitine O-palmitoyltransferase 1 liver isoform OS=Homo sapiens OX=9606 GN=CPT1A PE=1 SV=2
P62750	54	24	24		32835000	68708000	161580000	255790000	739000000	81600000	17695	60S ribosomal protein L23a OS=Homo sapiens OX=9606 GN=RPL23A PE=1 SV=1
Q9H307	24	16	16		4858100	19679000	37437000	78694000	267000000	5190000	81628	Pinin OS=Homo sapiens OX=9606 GN=PNN PE=1 SV=5
P04439	31	13	7	Carbamidomethylation	4347600	3800000	15811000	33050000	83400000	6470000	40841	HLA class I histocompatibility antigen A alpha chain OS=Homo sapiens OX=9606 GN=HLA-A PE=1 SV=2
P13797	39	20	18	Carbamidomethylation; Acetylation (Protein N-term)	1613900	9281000	46296000	81421000	1140000000	34300000	70811	Plastin-3 OS=Homo sapiens OX=9606 GN=PLS3 PE=1 SV=4
Q32MZ4	23	11	11	Carbamidomethylation	164560000	51738000	22390000	20455000	75900000	325000000	89253	Leucine-rich repeat flightless-interacting protein 1 OS=Homo sapiens OX=9606 GN=LRRFIP1 PE=1 SV=2
P04818	41	10	10		3029300	10768000	43654000	50754000	49100000	68100000	35716	Thymidylate synthase OS=Homo sapiens OX=9606 GN=TYMS PE=1 SV=3
Q9NW13	22	15	15		1531500	11336000	43161000	78088000	176000000	11500000	85738	RNA-binding protein 28 OS=Homo sapiens OX=9606 GN=RBM28 PE=1 SV=3
Q9UI10	35	12	12	Carbamidomethylation	1266200	3271300	13240000	21606000	34900000	3850000	57557	Translation initiation factor eIF-2B subunit delta OS=Homo sapiens OX=9606 GN=EIF2B4 PE=1 SV=2
Q13148	24	8	8		4186900	6705400	19313000	35071000	128000000	7280000	44740	TAR DNA-binding protein 43 OS=Homo sapiens OX=9606 GN=TARDBP PE=1 SV=1
O75083	35	11	11		0	0	19349000	56242000	390000000	16300000	66194	WD repeat-containing protein 1 OS=Homo sapiens OX=9606 GN=WDR1 PE=1 SV=4
P32119	59	15	12	Carbamidomethylation	264440	12819000	94554000	79678000	288000000	13200000	21892	Peroxiredoxin-2 OS=Homo sapiens OX=9606 GN=PRDX2 PE=1 SV=5
P63313	95	11	11	Oxidation (M); Acetylation (Protein N-term)	866410000	890600000	1572100000	1363700000	1300000000	114000000	5026	Thymosin beta-10 OS=Homo sapiens OX=9606 GN=TMSB10 PE=1 SV=2
O75821	48	13	13	Carbamidomethylation	9487800	25517000	67720000	68231000	115000000	5060000	35611	Eukaryotic translation initiation factor 3 subunit G OS=Homo sapiens OX=9606 GN=EIF3G PE=1 SV=2
Q9H1E3	37	12	12		8765900	1360200	24637000	32468000	78600000	32700000	27296	Nuclear ubiquitous casein and cyclin-dependent kinase substrate 1 OS=Homo sapiens OX=9606 GN=NUCKS1 PE=1 SV=1
P0DP24	61	15	15	Acetylation (Protein N-term)	7308100	39824000	210180000	341830000	1490000000	75200000	16838	Calmodulin-2 OS=Homo sapiens OX=9606 GN=CALM2 PE=1 SV=1
P0DP23	61	15	15	Acetylation (Protein N-term)	7308100	39824000	210180000	341830000	1490000000	75200000	16838	Calmodulin-1 OS=Homo sapiens OX=9606 GN=CALM1 PE=1 SV=1
P0DP25	61	15	15	Acetylation (Protein N-term)	7308100	39824000	210180000	341830000	1490000000	75200000	16838	Calmodulin-3 OS=Homo sapiens OX=9606 GN=CALM3 PE=1 SV=1
P62140	41	13	6	Acetylation (Protein N-term)	926530	582920	6425800	19566000	61800000	2720000	37187	Serine/threonine-protein phosphatase PP1-beta catalytic subunit OS=Homo sapiens OX=9606 GN=PPP1CB PE=1 SV=3
Q99848	38	17	17		4096500	16004000	39388000	70112000	116000000	24900000	34852	Probable rRNA-processing protein EBP2 OS=Homo sapiens OX=9606 GN=EBNA1BP2 PE=1 SV=2
O00151	62	14	14	Acetylation (Protein N-term)	12187000	27528000	68315000	84332000	106000000	3270000	36072	PDZ and LIM domain protein 1 OS=Homo sapiens OX=9606 GN=PDLIM1 PE=1 SV=4
O75340	63	11	11	Acetylation (Protein N-term)	6708300	11452000	23535000	41937000	233000000	16600000	21868	Programmed cell death protein 6 OS=Homo sapiens OX=9606 GN=PDCD6 PE=1 SV=1
Q5SSJ5	25	16	16	Acetylation (Protein N-term)	17309000	12079000	41270000	40709000	93100000	5100000	61207	Heterochromatin protein 1-binding protein 3 OS=Homo sapiens OX=9606 GN=HP1BP3 PE=1 SV=1
O43809	55	9	9	Acetylation (Protein N-term)	6695700	16860000	15297000	32444000	94300000	4490000	26227	Cleavage and polyadenylation specificity factor subunit 5 OS=Homo sapiens OX=9606 GN=NUDT21 PE=1 SV=1
Q9HDC9	37	10	10		9420500	47877000	37817000	18917000	108000000	29500000	46480	Adipocyte plasma membrane-associated protein OS=Homo sapiens OX=9606 GN=APMAP PE=1 SV=2
O14828	37	10	10		11327000	3791700	17627000	41069000	72800000	2670000	38287	Secretory carrier-associated membrane protein 3 OS=Homo sapiens OX=9606 GN=SCAMP3 PE=1 SV=3
O43776	28	14	14	Carbamidomethylation	36285000	5606600	15522000	62829000	265000000	99700000	62943	Asparagine--tRNA ligase cytoplasmic OS=Homo sapiens OX=9606 GN=NARS1 PE=1 SV=1
P54727	46	7	7		222890	0	35674000	57085000	333000000	8630000	43171	UV excision repair protein RAD23 homolog B OS=Homo sapiens OX=9606 GN=RAD23B PE=1 SV=1
P07195	32	10	10		2069100	4663700	74736000	120290000	2500000000	216000000	36639	L-lactate dehydrogenase B chain OS=Homo sapiens OX=9606 GN=LDHB PE=1 SV=2
P46778	41	16	16	Oxidation (M)	50369000	63667000	163820000	224590000	419000000	9090000	18565	60S ribosomal protein L21 OS=Homo sapiens OX=9606 GN=RPL21 PE=1 SV=2
Q9Y281	56	14	5	Acetylation (Protein N-term)	159510	738050	18487000	29486000	45200000	9330000	18737	Cofilin-2 OS=Homo sapiens OX=9606 GN=CFL2 PE=1 SV=1
P62913	48	15	15	Acetylation (Protein N-term)	48812000	115740000	181080000	286480000	556000000	140000000	20252	60S ribosomal protein L11 OS=Homo sapiens OX=9606 GN=RPL11 PE=1 SV=2
Q9UK76	74	9	9	Acetylation (Protein N-term)	49317000	14270000	83344000	96867000	244000000	18300000	16015	Jupiter microtubule associated homolog 1 OS=Homo sapiens OX=9606 GN=JPT1 PE=1 SV=3
Q9NS69	77	10	10	Oxidation (M); Acetylation (Protein N-term)	2915100	1076600	29092000	49564000	190000000	14900000	15522	Mitochondrial import receptor subunit TOM22 homolog OS=Homo sapiens OX=9606 GN=TOMM22 PE=1 SV=3
P22392	68	10	6	Oxidation (M)	3489600	12328000	219170000	414290000	1140000000	337000000	17298	Nucleoside diphosphate kinase B OS=Homo sapiens OX=9606 GN=NME2 PE=1 SV=1
P62899	54	14	14	Oxidation (M)	10362000	50995000	137510000	183150000	403000000	32000000	14463	60S ribosomal protein L31 OS=Homo sapiens OX=9606 GN=RPL31 PE=1 SV=1
Q96EY1	25	10	10		2748400	23593000	49108000	35781000	172000000	10800000	52489	DnaJ homolog subfamily A member 3 mitochondrial OS=Homo sapiens OX=9606 GN=DNAJA3 PE=1 SV=2
Q15436	25	12	10	Carbamidomethylation	854450	4461900	3853000	9921500	78400000	9240000	86161	Protein transport protein Sec23A OS=Homo sapiens OX=9606 GN=SEC23A PE=1 SV=2
Q86Y56	22	10	10	Acetylation (Protein N-term)	6006700	3895200	16650000	15156000	66800000	1150000	93521	Dynein axonemal assembly factor 5 OS=Homo sapiens OX=9606 GN=DNAAF5 PE=1 SV=4
P30043	49	10	10		828850	2459000	27169000	55804000	430000000	26800000	22119	Flavin reductase (NADPH) OS=Homo sapiens OX=9606 GN=BLVRB PE=1 SV=3
Q12873	11	14	4		35130	632010	8810300	8967700	12300000	1130000	226590	Chromodomain-helicase-DNA-binding protein 3 OS=Homo sapiens OX=9606 GN=CHD3 PE=1 SV=3
P54577	49	22	22	Carbamidomethylation; Acetylation (Protein N-term)	18672000	11085000	63791000	127350000	258000000	14200000	59144	Tyrosine--tRNA ligase cytoplasmic OS=Homo sapiens OX=9606 GN=YARS1 PE=1 SV=4
O00231	43	17	17	Acetylation (Protein N-term)	37973000	64376000	36201000	65483000	393000000	22800000	47464	26S proteasome non-ATPase regulatory subunit 11 OS=Homo sapiens OX=9606 GN=PSMD11 PE=1 SV=3
P04040	43	15	15	Acetylation (Protein N-term)	6296200	4679500	30804000	65216000	57000000	5450000	59756	Catalase OS=Homo sapiens OX=9606 GN=CAT PE=1 SV=3
Q13347	52	13	13	Carbamidomethylation	2200000	1316400	27374000	34212000	240000000	9520000	36502	Eukaryotic translation initiation factor 3 subunit I OS=Homo sapiens OX=9606 GN=EIF3I PE=1 SV=1
P08648	16	9	9		1256600	9701300	33574000	15058000	49300000	2480000	114536	Integrin alpha-5 OS=Homo sapiens OX=9606 GN=ITGA5 PE=1 SV=2
P98082	29	15	15		2882800	2790900	22965000	41672000	39900000	8200000	82448	Disabled homolog 2 OS=Homo sapiens OX=9606 GN=DAB2 PE=1 SV=3
Q92804	31	10	8	Carbamidomethylation	0	0	10236000	40431000	54700000	768000	61830	TATA-binding protein-associated factor 2N OS=Homo sapiens OX=9606 GN=TAF15 PE=1 SV=1
Q01628	49	6	5	Acetylation (Protein N-term)	1435200	0	17414000	20501000	20400000	3830000	14632	Interferon-induced transmembrane protein 3 OS=Homo sapiens OX=9606 GN=IFITM3 PE=1 SV=2
Q01844	15	8	8		2959900	6584600	100640000	165430000	143000000	3380000	68478	RNA-binding protein EWS OS=Homo sapiens OX=9606 GN=EWSR1 PE=1 SV=1
P31153	43	15	15	Carbamidomethylation	3504000	11930000	52802000	60305000	409000000	31100000	43661	S-adenosylmethionine synthase isoform type-2 OS=Homo sapiens OX=9606 GN=MAT2A PE=1 SV=1
P30084	51	14	14	Carbamidomethylation	18462000	12438000	50952000	208790000	189000000	140000000	31387	Enoyl-CoA hydratase mitochondrial OS=Homo sapiens OX=9606 GN=ECHS1 PE=1 SV=4
Q06787	26	13	11		896980	14003000	28051000	31444000	133000000	4090000	71175	Synaptic functional regulator FMR1 OS=Homo sapiens OX=9606 GN=FMR1 PE=1 SV=1
O94906	30	21	21		1669900	8376900	19606000	32087000	149000000	17500000	106925	Pre-mRNA-processing factor 6 OS=Homo sapiens OX=9606 GN=PRPF6 PE=1 SV=1
Q14203	15	12	12	Oxidation (M)	4261600	72327000	16003000	24392000	42000000	18800000	141694	Dynactin subunit 1 OS=Homo sapiens OX=9606 GN=DCTN1 PE=1 SV=3
P20290	60	13	13		27141000	2139800	77893000	88865000	502000000	4020000	22168	Transcription factor BTF3 OS=Homo sapiens OX=9606 GN=BTF3 PE=1 SV=1
Q96A72	72	8	8	Acetylation (Protein N-term)	14780000	1561900	33275000	66086000	175000000	6680000	17276	Protein mago nashi homolog 2 OS=Homo sapiens OX=9606 GN=MAGOHB PE=1 SV=1
Q14914	37	10	10		1004700	5947300	30751000	53261000	145000000	6470000	35870	Prostaglandin reductase 1 OS=Homo sapiens OX=9606 GN=PTGR1 PE=1 SV=2
Q07955	55	18	17	Carbamidomethylation; Acetylation (Protein N-term)	2544600	31396000	147770000	271900000	863000000	152000000	27745	Serine/arginine-rich splicing factor 1 OS=Homo sapiens OX=9606 GN=SRSF1 PE=1 SV=2
P05455	46	20	20		4782200	31812000	93492000	150040000	264000000	46600000	46837	Lupus La protein OS=Homo sapiens OX=9606 GN=SSB PE=1 SV=2
Q96KA5	25	8	8		2892300	6534500	27554000	36454000	42000000	1160000	62229	Cleft lip and palate transmembrane protein 1-like protein OS=Homo sapiens OX=9606 GN=CLPTM1L PE=1 SV=1
P61160	34	12	12	Carbamidomethylation	2170100	4890000	26579000	48567000	239000000	18300000	44761	Actin-related protein 2 OS=Homo sapiens OX=9606 GN=ACTR2 PE=1 SV=1
P30520	39	15	15	Carbamidomethylation; Acetylation (Protein N-term)	34852000	11393000	51892000	45627000	124000000	13300000	50097	Adenylosuccinate synthetase isozyme 2 OS=Homo sapiens OX=9606 GN=ADSS2 PE=1 SV=3
P21964	44	15	15	Carbamidomethylation	1155200	12431000	43580000	84688000	44100000	4790000	30037	Catechol O-methyltransferase OS=Homo sapiens OX=9606 GN=COMT PE=1 SV=2
P30050	55	9	9	Carbamidomethylation	6038700	15033000	84819000	140670000	971000000	43600000	17819	60S ribosomal protein L12 OS=Homo sapiens OX=9606 GN=RPL12 PE=1 SV=1
Q14671	12	7	6		1733300	0	3544000	6887000	10800000	1060000	126473	Pumilio homolog 1 OS=Homo sapiens OX=9606 GN=PUM1 PE=1 SV=3
P60174	62	14	14	Carbamidomethylation	2440100	15963000	27899000	37705000	259000000	23000000	26669	Triosephosphate isomerase OS=Homo sapiens OX=9606 GN=TPI1 PE=1 SV=4
O43242	36	15	15		4231500	4429000	37240000	48058000	112000000	6570000	60978	26S proteasome non-ATPase regulatory subunit 3 OS=Homo sapiens OX=9606 GN=PSMD3 PE=1 SV=2
P52948	15	15	15		88550	1053500	8561500	10206000	65600000	4560000	197578	Nuclear pore complex protein Nup98-Nup96 OS=Homo sapiens OX=9606 GN=NUP98 PE=1 SV=4
Q9BY77	39	10	10		4338500	7303800	28016000	32598000	41400000	5580000	46089	Polymerase delta-interacting protein 3 OS=Homo sapiens OX=9606 GN=POLDIP3 PE=1 SV=2
P14314	29	9	9	Carbamidomethylation	969410	2585200	60140000	20130000	174000000	14600000	59426	Glucosidase 2 subunit beta OS=Homo sapiens OX=9606 GN=PRKCSH PE=1 SV=2
Q1KMD3	34	21	21	Carbamidomethylation	9798600	3014700	39224000	52621000	66200000	4760000	85105	Heterogeneous nuclear ribonucleoprotein U-like protein 2 OS=Homo sapiens OX=9606 GN=HNRNPUL2 PE=1 SV=1
O00566	24	13	13		2264300	5897600	17431000	11656000	548000000	43000000	78864	U3 small nucleolar ribonucleoprotein protein MPP10 OS=Homo sapiens OX=9606 GN=MPHOSPH10 PE=1 SV=2
Q12849	41	9	9		0	192490	10970000	17061000	32300000	2140000	53126	G-rich sequence factor 1 OS=Homo sapiens OX=9606 GN=GRSF1 PE=1 SV=3
Q96A33	32	12	12		3953500	6225100	11596000	26027000	58600000	7990000	55874	PAT complex subunit CCDC47 OS=Homo sapiens OX=9606 GN=CCDC47 PE=1 SV=1
Q16513	22	12	12	Acetylation (Protein N-term)	748970	623410	6135600	9573500	41100000	975000	112035	Serine/threonine-protein kinase N2 OS=Homo sapiens OX=9606 GN=PKN2 PE=1 SV=1
P09382	60	10	10	Carbamidomethylation; Oxidation (M); Acetylation (Protein N-term)	3931200	9877700	50459000	71065000	1190000000	58900000	14716	Galectin-1 OS=Homo sapiens OX=9606 GN=LGALS1 PE=1 SV=2
P23526	39	16	15	Carbamidomethylation; Acetylation (Protein N-term)	1370500	16831000	55006000	65807000	427000000	18100000	47716	Adenosylhomocysteinase OS=Homo sapiens OX=9606 GN=AHCY PE=1 SV=4
P46782	59	16	16	Carbamidomethylation; Oxidation (M); Acetylation (Protein N-term)	18087000	17277000	109320000	140380000	838000000	50800000	22876	40S ribosomal protein S5 OS=Homo sapiens OX=9606 GN=RPS5 PE=1 SV=4
O43660	32	9	9		122040	793610	9848700	7903700	16100000	0	57194	Pleiotropic regulator 1 OS=Homo sapiens OX=9606 GN=PLRG1 PE=1 SV=1
P10515	25	10	10		298340	329920	10039000	20211000	162000000	48100000	68997	Dihydrolipoyllysine-residue acetyltransferase component of pyruvate dehydrogenase complex mitochondrial OS=Homo sapiens OX=9606 GN=DLAT PE=1 SV=3
P04080	77	7	7	Carbamidomethylation; Oxidation (M); Acetylation (Protein N-term)	11088000	4200800	45392000	75465000	57000000	11900000	11140	Cystatin-B OS=Homo sapiens OX=9606 GN=CSTB PE=1 SV=2
P62888	58	11	11	Carbamidomethylation	2669500	14359000	75929000	162760000	401000000	28800000	12784	60S ribosomal protein L30 OS=Homo sapiens OX=9606 GN=RPL30 PE=1 SV=2
Q9NQZ2	27	10	10		0	2471100	11381000	29173000	65400000	5390000	54558	Something about silencing protein 10 OS=Homo sapiens OX=9606 GN=UTP3 PE=1 SV=1
Q15427	21	9	9	Oxidation (M); Acetylation (Protein N-term)	0	0	10445000	12483000	160000000	185000000	44386	Splicing factor 3B subunit 4 OS=Homo sapiens OX=9606 GN=SF3B4 PE=1 SV=1
P24534	66	12	12	Carbamidomethylation; Oxidation (M)	878240	4284400	69791000	147580000	525000000	16800000	24764	Elongation factor 1-beta OS=Homo sapiens OX=9606 GN=EEF1B2 PE=1 SV=3
P11310	29	11	11	Carbamidomethylation; Oxidation (M)	13629000	52742000	50636000	92006000	191000000	4080000	46588	Medium-chain specific acyl-CoA dehydrogenase mitochondrial OS=Homo sapiens OX=9606 GN=ACADM PE=1 SV=1
P43897	34	5	5		5326500	9567200	36251000	66217000	53100000	2470000	35391	Elongation factor Ts mitochondrial OS=Homo sapiens OX=9606 GN=TSFM PE=1 SV=2
P60866	26	9	9	Acetylation (Protein N-term)	100330000	133240000	120260000	224060000	608000000	25100000	13373	40S ribosomal protein S20 OS=Homo sapiens OX=9606 GN=RPS20 PE=1 SV=1
P62906	35	15	15		5550400	2224900	21707000	34926000	723000000	44300000	24831	60S ribosomal protein L10a OS=Homo sapiens OX=9606 GN=RPL10A PE=1 SV=2
P68400	55	11	11		1518500	1854500	21663000	156750000	220000000	15000000	45144	Casein kinase II subunit alpha OS=Homo sapiens OX=9606 GN=CSNK2A1 PE=1 SV=1
P62820	66	13	5	Oxidation (M); Acetylation (Protein N-term)	2079900	2253600	3501700	8936200	125000000	42000000	22678	Ras-related protein Rab-1A OS=Homo sapiens OX=9606 GN=RAB1A PE=1 SV=3
Q9BUP3	44	12	12		0	5349800	37991000	76313000	170000000	4710000	27049	Oxidoreductase HTATIP2 OS=Homo sapiens OX=9606 GN=HTATIP2 PE=1 SV=2
Q5BKZ1	24	10	10	Carbamidomethylation; Acetylation (Protein N-term)	2564700	3175400	20620000	38273000	205000000	8490000	65654	DBIRD complex subunit ZNF326 OS=Homo sapiens OX=9606 GN=ZNF326 PE=1 SV=2
Q99873	45	17	17	Carbamidomethylation; Oxidation (M)	7101900	3320800	67078000	123780000	131000000	80400000	42462	Protein arginine N-methyltransferase 1 OS=Homo sapiens OX=9606 GN=PRMT1 PE=1 SV=3
P61254	46	14	2		0	2810100	5351300	6962200	131000000	6090000	17258	60S ribosomal protein L26 OS=Homo sapiens OX=9606 GN=RPL26 PE=1 SV=1
Q8IY17	10	7	7		925530	1496400	5006800	10502000	27400000	12600000	150953	Patatin-like phospholipase domain-containing protein 6 OS=Homo sapiens OX=9606 GN=PNPLA6 PE=1 SV=3
Q92769	23	9	7		0	1367300	6146000	17128000	31800000	4170000	55364	Histone deacetylase 2 OS=Homo sapiens OX=9606 GN=HDAC2 PE=1 SV=2
P62910	36	13	13	Carbamidomethylation	2475400	18986000	111780000	130510000	186000000	24700000	15860	60S ribosomal protein L32 OS=Homo sapiens OX=9606 GN=RPL32 PE=1 SV=2
Q9Y266	50	16	16		1598400	8787700	39444000	81977000	530000000	22800000	38243	Nuclear migration protein nudC OS=Homo sapiens OX=9606 GN=NUDC PE=1 SV=1
P62333	44	14	14	Carbamidomethylation	296220	3553000	19526000	38489000	195000000	6090000	44173	26S proteasome regulatory subunit 10B OS=Homo sapiens OX=9606 GN=PSMC6 PE=1 SV=1
Q09161	25	14	14	Carbamidomethylation	0	730050	15098000	39128000	103000000	4060000	91839	Nuclear cap-binding protein subunit 1 OS=Homo sapiens OX=9606 GN=NCBP1 PE=1 SV=1
O75396	52	11	11		12114000	12396000	22912000	61742000	239000000	15300000	24593	Vesicle-trafficking protein SEC22b OS=Homo sapiens OX=9606 GN=SEC22B PE=1 SV=4
Q96G21	37	7	7		1631100	6123100	21553000	26493000	43800000	5690000	33757	U3 small nucleolar ribonucleoprotein protein IMP4 OS=Homo sapiens OX=9606 GN=IMP4 PE=1 SV=1
O15213	25	9	9	Carbamidomethylation; Acetylation (Protein N-term)	4708500	12801000	44731000	78687000	105000000	56200000	68071	WD repeat-containing protein 46 OS=Homo sapiens OX=9606 GN=WDR46 PE=1 SV=3
Q9NZI8	26	13	11		4385900	3288100	21001000	34907000	73500000	18300000	63481	Insulin-like growth factor 2 mRNA-binding protein 1 OS=Homo sapiens OX=9606 GN=IGF2BP1 PE=1 SV=2
P53985	15	7	7	Carbamidomethylation	4058200	2299600	7655600	30284000	64400000	3190000	53944	Monocarboxylate transporter 1 OS=Homo sapiens OX=9606 GN=SLC16A1 PE=1 SV=3
P52209	33	13	13	Carbamidomethylation	2037200	15864000	27413000	52488000	500000000	23900000	53140	6-phosphogluconate dehydrogenase decarboxylating OS=Homo sapiens OX=9606 GN=PGD PE=1 SV=3
P48047	55	9	9	Carbamidomethylation	3032400	1179500	161370000	80909000	294000000	9210000	23277	ATP synthase subunit O mitochondrial OS=Homo sapiens OX=9606 GN=ATP5PO PE=1 SV=1
P35659	47	19	19	Acetylation (Protein N-term)	6543700	10142000	61780000	99825000	199000000	32500000	42674	Protein DEK OS=Homo sapiens OX=9606 GN=DEK PE=1 SV=1
Q9H910	59	9	9	Carbamidomethylation; Acetylation (Protein N-term)	9805100	10243000	37757000	50625000	33800000	5720000	20063	Jupiter microtubule associated homolog 2 OS=Homo sapiens OX=9606 GN=JPT2 PE=1 SV=1
P61981	43	16	7		623900	6544200	20716000	45905000	598000000	25800000	28303	14-3-3 protein gamma OS=Homo sapiens OX=9606 GN=YWHAG PE=1 SV=2
P84098	28	10	10		27724000	19168000	108860000	158820000	761000000	38200000	23466	60S ribosomal protein L19 OS=Homo sapiens OX=9606 GN=RPL19 PE=1 SV=1
O95373	13	11	11	Acetylation (Protein N-term)	532580	1094200	16370000	35516000	567000000	26600000	119516	Importin-7 OS=Homo sapiens OX=9606 GN=IPO7 PE=1 SV=1
P46779	36	10	10	Acetylation (Protein N-term)	25472000	20478000	39312000	85238000	308000000	19300000	15747	60S ribosomal protein L28 OS=Homo sapiens OX=9606 GN=RPL28 PE=1 SV=3
P08559	40	14	14		5677400	61315000	17252000	19717000	356000000	34200000	43296	Pyruvate dehydrogenase E1 component subunit alpha somatic form mitochondrial OS=Homo sapiens OX=9606 GN=PDHA1 PE=1 SV=3
O94776	36	16	15		3829000	3817300	31356000	44177000	64400000	13400000	75023	Metastasis-associated protein MTA2 OS=Homo sapiens OX=9606 GN=MTA2 PE=1 SV=1
O15143	21	6	6	Carbamidomethylation; Acetylation (Protein N-term)	931090	6303200	37447000	39407000	95100000	3130000	40950	Actin-related protein 2/3 complex subunit 1B OS=Homo sapiens OX=9606 GN=ARPC1B PE=1 SV=3
O75347	56	9	9		8348200	53685000	115720000	113350000	273000000	16500000	12855	Tubulin-specific chaperone A OS=Homo sapiens OX=9606 GN=TBCA PE=1 SV=3
Q9Y5M8	34	8	8	Acetylation (Protein N-term)	9661100	4290100	15641000	30539000	87100000	5120000	29702	Signal recognition particle receptor subunit beta OS=Homo sapiens OX=9606 GN=SRPRB PE=1 SV=3
Q15003	21	9	9	Carbamidomethylation	309280	5204200	17033000	26458000	42900000	2090000	82563	Condensin complex subunit 2 OS=Homo sapiens OX=9606 GN=NCAPH PE=1 SV=3
Q9BUQ8	34	20	20	Carbamidomethylation	2347700	10887000	31126000	43170000	147000000	5420000	95583	Probable ATP-dependent RNA helicase DDX23 OS=Homo sapiens OX=9606 GN=DDX23 PE=1 SV=3
Q99700	13	8	8	Carbamidomethylation	17602000	45392000	15838000	33734000	265000000	28400000	140283	Ataxin-2 OS=Homo sapiens OX=9606 GN=ATXN2 PE=1 SV=2
P30086	63	8	8	Carbamidomethylation	125440	673170	52681000	41104000	712000000	16100000	21057	Phosphatidylethanolamine-binding protein 1 OS=Homo sapiens OX=9606 GN=PEBP1 PE=1 SV=3
Q9UBT2	20	8	8	Carbamidomethylation	271760	3011900	10273000	14202000	73100000	12700000	71224	SUMO-activating enzyme subunit 2 OS=Homo sapiens OX=9606 GN=UBA2 PE=1 SV=2
Q9BVK6	34	6	6		0	635040	11898000	18624000	13200000	1090000	27277	Transmembrane emp24 domain-containing protein 9 OS=Homo sapiens OX=9606 GN=TMED9 PE=1 SV=2
Q96AG4	38	14	14	Carbamidomethylation	1673400	5903800	28496000	61219000	403000000	27000000	34930	Leucine-rich repeat-containing protein 59 OS=Homo sapiens OX=9606 GN=LRRC59 PE=1 SV=1
Q9BRJ6	36	6	6		1706000	4382800	42737000	19634000	27100000	14900000	22083	Uncharacterized protein C7orf50 OS=Homo sapiens OX=9606 GN=C7orf50 PE=1 SV=1
Q9NZM5	35	8	8		0	0	27422000	9841000	65900000	1160000	54389	Ribosome biogenesis protein NOP53 OS=Homo sapiens OX=9606 GN=NOP53 PE=1 SV=2
O43852	52	9	9		703100	298840	50824000	79336000	353000000	110000000	37107	Calumenin OS=Homo sapiens OX=9606 GN=CALU PE=1 SV=2
P54709	41	10	10		6771200	15807000	25192000	47417000	209000000	16100000	31513	Sodium/potassium-transporting ATPase subunit beta-3 OS=Homo sapiens OX=9606 GN=ATP1B3 PE=1 SV=1
P11908	42	12	4	Carbamidomethylation	14540000	4605900	16783000	24081000	59500000	16300000	34769	Ribose-phosphate pyrophosphokinase 2 OS=Homo sapiens OX=9606 GN=PRPS2 PE=1 SV=2
Q16666	24	11	11		779170	652580	12167000	28044000	238000000	2120000	88256	Gamma-interferon-inducible protein 16 OS=Homo sapiens OX=9606 GN=IFI16 PE=1 SV=3
P61353	49	15	15		2815100	12186000	141620000	212200000	570000000	25100000	15798	60S ribosomal protein L27 OS=Homo sapiens OX=9606 GN=RPL27 PE=1 SV=2
Q8IYD1	20	9	2	Carbamidomethylation	136350	0	6620700	5356200	116000000	5950000	68883	Eukaryotic peptide chain release factor GTP-binding subunit ERF3B OS=Homo sapiens OX=9606 GN=GSPT2 PE=1 SV=2
Q9NQ55	29	8	8		2366700	4573600	20743000	27549000	151000000	34300000	53194	Suppressor of SWI4 1 homolog OS=Homo sapiens OX=9606 GN=PPAN PE=2 SV=1
P62841	43	9	9	Oxidation (M)	1448800	52209000	78705000	133180000	597000000	39800000	17040	40S ribosomal protein S15 OS=Homo sapiens OX=9606 GN=RPS15 PE=1 SV=2
P35249	29	10	10	Carbamidomethylation	218110	17281000	19386000	41834000	83500000	25300000	39682	Replication factor C subunit 4 OS=Homo sapiens OX=9606 GN=RFC4 PE=1 SV=2
Q96SB4	25	12	10	Carbamidomethylation	122440	5395100	33696000	74706000	50200000	42700000	74325	SRSF protein kinase 1 OS=Homo sapiens OX=9606 GN=SRPK1 PE=1 SV=2
P84085	57	10	5		1066200	12334000	44236000	15722000	30000000	1130000	20530	ADP-ribosylation factor 5 OS=Homo sapiens OX=9606 GN=ARF5 PE=1 SV=2
P28066	44	8	8	Carbamidomethylation	2213100	8334600	66348000	71803000	150000000	1790000	26411	Proteasome subunit alpha type-5 OS=Homo sapiens OX=9606 GN=PSMA5 PE=1 SV=3
P61158	42	11	11	Carbamidomethylation; Acetylation (Protein N-term)	189440	1280600	15459000	45288000	161000000	12400000	47371	Actin-related protein 3 OS=Homo sapiens OX=9606 GN=ACTR3 PE=1 SV=3
Q13247	22	9	6		19665000	38089000	69916000	122640000	89200000	6800000	39587	Serine/arginine-rich splicing factor 6 OS=Homo sapiens OX=9606 GN=SRSF6 PE=1 SV=2
O75934	57	8	8	Carbamidomethylation; Acetylation (Protein N-term)	0	3372600	9440600	14000000	21100000	3300000	26131	Pre-mRNA-splicing factor SPF27 OS=Homo sapiens OX=9606 GN=BCAS2 PE=1 SV=1
Q15785	28	7	7		2309200	3863900	18760000	32128000	23000000	2980000	34559	Mitochondrial import receptor subunit TOM34 OS=Homo sapiens OX=9606 GN=TOMM34 PE=1 SV=2
Q15056	52	14	14	Acetylation (Protein N-term)	34908000	40531000	125250000	159490000	314000000	26600000	27385	Eukaryotic translation initiation factor 4H OS=Homo sapiens OX=9606 GN=EIF4H PE=1 SV=5
P45880	32	9	9		0	2637200	9689100	21024000	315000000	19000000	31567	Voltage-dependent anion-selective channel protein 2 OS=Homo sapiens OX=9606 GN=VDAC2 PE=1 SV=2
Q9Y3E5	42	7	7		539270	428020	11477000	16465000	13800000	0	19194	Peptidyl-tRNA hydrolase 2 mitochondrial OS=Homo sapiens OX=9606 GN=PTRH2 PE=1 SV=1
Q13206	13	8	8		1947500	3682100	6895700	12545000	85400000	399000	100888	Probable ATP-dependent RNA helicase DDX10 OS=Homo sapiens OX=9606 GN=DDX10 PE=1 SV=2
Q12792	27	9	9	Acetylation (Protein N-term)	3399500	7405400	13807000	16666000	59200000	3430000	40283	Twinfilin-1 OS=Homo sapiens OX=9606 GN=TWF1 PE=1 SV=3
O43795	14	13	12		2674000	14496000	31996000	43401000	170000000	27200000	131985	Unconventional myosin-Ib OS=Homo sapiens OX=9606 GN=MYO1B PE=1 SV=3
Q12904	44	7	7		0	528220	24933000	39989000	208000000	7860000	34353	Aminoacyl tRNA synthase complex-interacting multifunctional protein 1 OS=Homo sapiens OX=9606 GN=AIMP1 PE=1 SV=2
P82979	60	9	9	Acetylation (Protein N-term)	6098800	13559000	27420000	44711000	236000000	6180000	23671	SAP domain-containing ribonucleoprotein OS=Homo sapiens OX=9606 GN=SARNP PE=1 SV=3
P83916	39	8	7	Oxidation (M)	208530	11813000	23855000	19753000	32700000	9250000	21418	Chromobox protein homolog 1 OS=Homo sapiens OX=9606 GN=CBX1 PE=1 SV=1
Q15738	37	9	9	Acetylation (Protein N-term)	5879600	4873300	13089000	14488000	37000000	212000000	41900	Sterol-4-alpha-carboxylate 3-dehydrogenase decarboxylating OS=Homo sapiens OX=9606 GN=NSDHL PE=1 SV=2
Q16629	32	12	10		1384900	5581300	16267000	46409000	221000000	6150000	27367	Serine/arginine-rich splicing factor 7 OS=Homo sapiens OX=9606 GN=SRSF7 PE=1 SV=1
Q01130	24	8	6	Oxidation (M); Acetylation (Protein N-term)	925380	5326400	100200000	127840000	443000000	18900000	25476	Serine/arginine-rich splicing factor 2 OS=Homo sapiens OX=9606 GN=SRSF2 PE=1 SV=4
Q5JTV8	27	12	12		10360000	21759000	39475000	69812000	212000000	9320000	66248	Torsin-1A-interacting protein 1 OS=Homo sapiens OX=9606 GN=TOR1AIP1 PE=1 SV=2
P61019	65	11	11		100370	2461500	39416000	51816000	180000000	11700000	23546	Ras-related protein Rab-2A OS=Homo sapiens OX=9606 GN=RAB2A PE=1 SV=1
P17096	41	9	9		50961000	130820000	152920000	209560000	295000000	18100000	11676	High mobility group protein HMG-I/HMG-Y OS=Homo sapiens OX=9606 GN=HMGA1 PE=1 SV=3
Q969V3	28	11	11		54790000	73152000	26758000	145640000	94400000	4630000000	62974	Nicalin OS=Homo sapiens OX=9606 GN=NCLN PE=1 SV=2
Q10713	25	9	9		1731200	4808700	33056000	68699000	67900000	5370000	58253	Mitochondrial-processing peptidase subunit alpha OS=Homo sapiens OX=9606 GN=PMPCA PE=1 SV=2
P31948	24	9	9	Carbamidomethylation; Acetylation (Protein N-term)	1298700	2659800	47481000	56435000	800000000	28600000	62639	Stress-induced-phosphoprotein 1 OS=Homo sapiens OX=9606 GN=STIP1 PE=1 SV=1
P05386	88	5	4	Carbamidomethylation; Oxidation (M)	749190	773740	48823000	54194000	670000000	16900000	11514	60S acidic ribosomal protein P1 OS=Homo sapiens OX=9606 GN=RPLP1 PE=1 SV=1
Q00796	26	6	6	Acetylation (Protein N-term)	1813300	4275900	19475000	42174000	76300000	32200000	38325	Sorbitol dehydrogenase OS=Homo sapiens OX=9606 GN=SORD PE=1 SV=4
O60828	38	6	6		1640600	1060600	18096000	22486000	94900000	18900000	30472	Polyglutamine-binding protein 1 OS=Homo sapiens OX=9606 GN=PQBP1 PE=1 SV=1
Q9Y3T9	18	14	14		830100	6793700	23381000	45532000	144000000	22500000	84919	Nucleolar complex protein 2 homolog OS=Homo sapiens OX=9606 GN=NOC2L PE=1 SV=4
P62269	64	18	18	Acetylation (Protein N-term)	13719000	77936000	129940000	257440000	843000000	51900000	17719	40S ribosomal protein S18 OS=Homo sapiens OX=9606 GN=RPS18 PE=1 SV=3
P55036	22	6	6		7070700	8039300	17234000	32018000	95800000	9520000	40737	26S proteasome non-ATPase regulatory subunit 4 OS=Homo sapiens OX=9606 GN=PSMD4 PE=1 SV=1
Q9Y5A9	23	9	7	Acetylation (Protein N-term)	5737500	6133700	9048400	18728000	67400000	15300000	62334	YTH domain-containing family protein 2 OS=Homo sapiens OX=9606 GN=YTHDF2 PE=1 SV=2
P61586	61	13	5	Carbamidomethylation	0	0	27997000	43165000	42800000	2890000	21768	Transforming protein RhoA OS=Homo sapiens OX=9606 GN=RHOA PE=1 SV=1
P26639	23	14	14	Acetylation (Protein N-term)	17692000	11409000	22128000	38527000	485000000	33900000	83435	Threonine--tRNA ligase 1 cytoplasmic OS=Homo sapiens OX=9606 GN=TARS1 PE=1 SV=3
O75844	21	7	7		0	11126000	15298000	12041000	46600000	2430000	54813	CAAX prenyl protease 1 homolog OS=Homo sapiens OX=9606 GN=ZMPSTE24 PE=1 SV=2
P62979	62	13	13	Carbamidomethylation	9739300	7658900	65559000	76865000	1530000	628000	17965	Ubiquitin-40S ribosomal protein S27a OS=Homo sapiens OX=9606 GN=RPS27A PE=1 SV=2
P05204	51	7	6		62474000	119180000	86289000	109450000	13200000	200000	9393	Non-histone chromosomal protein HMG-17 OS=Homo sapiens OX=9606 GN=HMGN2 PE=1 SV=3
Q9Y2L1	21	11	11		1644800	27965000	40150000	12469000	19100000	859000	109003	Exosome complex exonuclease RRP44 OS=Homo sapiens OX=9606 GN=DIS3 PE=1 SV=2
Q96G23	20	6	6		1166100	60252	30949000	58717000	94800000	13800000	44876	Ceramide synthase 2 OS=Homo sapiens OX=9606 GN=CERS2 PE=1 SV=1
P52789	19	12	11	Carbamidomethylation	1898700	994970	8515200	12631000	44000000	3480000	102380	Hexokinase-2 OS=Homo sapiens OX=9606 GN=HK2 PE=1 SV=2
Q9UKD2	44	10	10	Carbamidomethylation	1565200	0	5556100	11498000	80600000	6790000	27560	mRNA turnover protein 4 homolog OS=Homo sapiens OX=9606 GN=MRTO4 PE=1 SV=2
P39019	55	12	12	Oxidation (M)	96890000	89517000	106110000	137710000	973000000	40600000	16060	40S ribosomal protein S19 OS=Homo sapiens OX=9606 GN=RPS19 PE=1 SV=2
Q92522	38	12	12	Oxidation (M); Acetylation (Protein N-term)	21749000	20831000	62353000	132470000	404000000	22900000	22487	Histone H1.10 OS=Homo sapiens OX=9606 GN=H1-10 PE=1 SV=1
P10644	37	9	9	Carbamidomethylation; Acetylation (Protein N-term)	1433700	3193000	11650000	16108000	19300000	2480000	42982	cAMP-dependent protein kinase type I-alpha regulatory subunit OS=Homo sapiens OX=9606 GN=PRKAR1A PE=1 SV=1
Q9P287	37	8	8	Carbamidomethylation	9228900	7403800	24247000	21780000	42700000	208000	35979	BRCA2 and CDKN1A-interacting protein OS=Homo sapiens OX=9606 GN=BCCIP PE=1 SV=1
P30040	57	12	12	Carbamidomethylation	0	1501700	15197000	38697000	95300000	2410000	28993	Endoplasmic reticulum resident protein 29 OS=Homo sapiens OX=9606 GN=ERP29 PE=1 SV=4
Q92688	29	8	5	Carbamidomethylation	867420	18756000	51494000	85803000	2940000000	42800000	28788	Acidic leucine-rich nuclear phosphoprotein 32 family member B OS=Homo sapiens OX=9606 GN=ANP32B PE=1 SV=1
P62249	49	12	12		82663000	112700000	161940000	238380000	635000000	26100000	16445	40S ribosomal protein S16 OS=Homo sapiens OX=9606 GN=RPS16 PE=1 SV=2
P99999	50	8	8		1569500	3262800	8967800	21252000	92900000	8590000	11749	Cytochrome c OS=Homo sapiens OX=9606 GN=CYCS PE=1 SV=2
P61006	46	11	4		0	0	0	4033500	25500000	1960000	23668	Ras-related protein Rab-8A OS=Homo sapiens OX=9606 GN=RAB8A PE=1 SV=1
P40121	43	9	9	Oxidation (M); Acetylation (Protein N-term)	4805600	6331400	34969000	31745000	260000000	9230000	38499	Macrophage-capping protein OS=Homo sapiens OX=9606 GN=CAPG PE=1 SV=2
Q8N183	49	7	7		0	82211	12864000	29095000	61400000	1270000	19856	NADH dehydrogenase [ubiquinone] 1 alpha subcomplex assembly factor 2 OS=Homo sapiens OX=9606 GN=NDUFAF2 PE=1 SV=1
Q01650	10	8	8		0	8240400	27596000	44219000	61200000	2970000	55010	Large neutral amino acids transporter small subunit 1 OS=Homo sapiens OX=9606 GN=SLC7A5 PE=1 SV=2
P37108	61	8	8		57078000	53391000	92964000	108890000	198000000	10700000	14570	Signal recognition particle 14 kDa protein OS=Homo sapiens OX=9606 GN=SRP14 PE=1 SV=2
P31947	52	11	9	Carbamidomethylation	2488500	48798000	112430000	168540000	366000000	24600000	27774	14-3-3 protein sigma OS=Homo sapiens OX=9606 GN=SFN PE=1 SV=1
E9PAV3	5	8	8	Oxidation (M)	438960	5218000	43509000	97791000	795000000	60800000	205419	Nascent polypeptide-associated complex subunit alpha muscle-specific form OS=Homo sapiens OX=9606 GN=NACA PE=1 SV=1
Q9BQ39	17	10	5		0	0	2101700	465470	42900000	2180000	82565	ATP-dependent RNA helicase DDX50 OS=Homo sapiens OX=9606 GN=DDX50 PE=1 SV=1
P47985	42	8	8		2140500	2674100	139670000	27814000	154000000	172000000	29668	Cytochrome b-c1 complex subunit Rieske mitochondrial OS=Homo sapiens OX=9606 GN=UQCRFS1 PE=1 SV=2
Q969S3	33	10	10		4306100	1551800	11877000	30143000	37800000	6240000	54272	Zinc finger protein 622 OS=Homo sapiens OX=9606 GN=ZNF622 PE=1 SV=1
Q15061	23	8	8	Carbamidomethylation	4664100	11459000	23191000	32103000	46300000	1400000	74891	WD repeat-containing protein 43 OS=Homo sapiens OX=9606 GN=WDR43 PE=1 SV=3
P16949	45	12	12	Acetylation (Protein N-term)	45056000	73694000	116840000	300570000	192000000	54500000	17302	Stathmin OS=Homo sapiens OX=9606 GN=STMN1 PE=1 SV=3
Q96TA2	16	8	8		5259000	7780100	21650000	63241000	111000000	5730000	86455	ATP-dependent zinc metalloprotease YME1L1 OS=Homo sapiens OX=9606 GN=YME1L1 PE=1 SV=2
Q00325	32	14	14		8104600	9062400	26909000	53150000	99400000	13400000	40095	Phosphate carrier protein mitochondrial OS=Homo sapiens OX=9606 GN=SLC25A3 PE=1 SV=2
O94905	31	8	6		1010500	633670	15511000	27694000	31200000	2180000	37840	Erlin-2 OS=Homo sapiens OX=9606 GN=ERLIN2 PE=1 SV=1
P61011	23	8	8		58705	212530	18324000	32157000	77600000	19600000	55705	Signal recognition particle 54 kDa protein OS=Homo sapiens OX=9606 GN=SRP54 PE=1 SV=1
O00592	22	13	13	Carbamidomethylation	4750600	16625000	54230000	62505000	106000000	7330000	58635	Podocalyxin OS=Homo sapiens OX=9606 GN=PODXL PE=1 SV=2
Q8NI27	8	10	10	Acetylation (Protein N-term)	201720	3973500	5622900	25997000	27300000	495000	182774	THO complex subunit 2 OS=Homo sapiens OX=9606 GN=THOC2 PE=1 SV=2
P21291	46	7	7	Carbamidomethylation	5271000	3576900	32152000	51227000	537000000	14000000	20567	Cysteine and glycine-rich protein 1 OS=Homo sapiens OX=9606 GN=CSRP1 PE=1 SV=3
P52565	48	7	7	Acetylation (Protein N-term)	190090000	78658000	320520000	325900000	629000000	27000000	23207	Rho GDP-dissociation inhibitor 1 OS=Homo sapiens OX=9606 GN=ARHGDIA PE=1 SV=3
P28074	27	6	6		7594500	14095000	46987000	63682000	183000000	13100000	28480	Proteasome subunit beta type-5 OS=Homo sapiens OX=9606 GN=PSMB5 PE=1 SV=3
Q14258	22	13	13		356360	4438100	23976000	37659000	76500000	3740000	70974	E3 ubiquitin/ISG15 ligase TRIM25 OS=Homo sapiens OX=9606 GN=TRIM25 PE=1 SV=2
Q9UKM9	48	11	11		2207200	3917000	26756000	34675000	150000000	9960000	32463	RNA-binding protein Raly OS=Homo sapiens OX=9606 GN=RALY PE=1 SV=1
P62995	38	13	10	Acetylation (Protein N-term)	830280	0	9000900	57307000	105000000	3250000	33666	Transformer-2 protein homolog beta OS=Homo sapiens OX=9606 GN=TRA2B PE=1 SV=1
P60903	52	8	8	Oxidation (M)	245480	1026000	134300000	217530000	905000000	27000000	11203	Protein S100-A10 OS=Homo sapiens OX=9606 GN=S100A10 PE=1 SV=2
P62266	42	10	10		6774500	22294000	41476000	73459000	211000000	20200000	15808	40S ribosomal protein S23 OS=Homo sapiens OX=9606 GN=RPS23 PE=1 SV=3
Q9BTV4	39	8	8		7963100	3567900	21062000	19184000	21800000	4100000	44876	Transmembrane protein 43 OS=Homo sapiens OX=9606 GN=TMEM43 PE=1 SV=1
Q9Y383	24	10	7		0	129220	20142000	33335000	197000000	9500000	46514	Putative RNA-binding protein Luc7-like 2 OS=Homo sapiens OX=9606 GN=LUC7L2 PE=1 SV=2
P14324	28	10	10		10503000	9151800	50435000	101870000	237000000	11600000	48276	Farnesyl pyrophosphate synthase OS=Homo sapiens OX=9606 GN=FDPS PE=1 SV=4
Q04837	64	9	9		6960400	7006900	19228000	38958000	155000000	9620000	17260	Single-stranded DNA-binding protein mitochondrial OS=Homo sapiens OX=9606 GN=SSBP1 PE=1 SV=1
Q9BQA1	39	7	7		2147300	6903400	21829000	30339000	128000000	17600000	36724	Methylosome protein 50 OS=Homo sapiens OX=9606 GN=WDR77 PE=1 SV=1
Q8WYA6	9	3	3	Acetylation (Protein N-term)	0	0	4119700	6556400	9760000	83600	65173	Beta-catenin-like protein 1 OS=Homo sapiens OX=9606 GN=CTNNBL1 PE=1 SV=1
P49773	68	8	8	Acetylation (Protein N-term)	15285000	15682000	62189000	70782000	329000000	10900000	13802	Histidine triad nucleotide-binding protein 1 OS=Homo sapiens OX=9606 GN=HINT1 PE=1 SV=2
P15927	72	9	9	Carbamidomethylation; Acetylation (Protein N-term)	2231900	1823900	14169000	17044000	72900000	7520000	29247	Replication protein A 32 kDa subunit OS=Homo sapiens OX=9606 GN=RPA2 PE=1 SV=1
P82673	35	6	6		541700	2971700	4275400	4681600	20200000	10700	36844	28S ribosomal protein S35 mitochondrial OS=Homo sapiens OX=9606 GN=MRPS35 PE=1 SV=1
P04181	29	7	7		50651	1338100	3023200	5078000	40700000	345000	48535	Ornithine aminotransferase mitochondrial OS=Homo sapiens OX=9606 GN=OAT PE=1 SV=1
Q3ZCQ8	21	7	7		0	0	3502500	8421000	380000000	13400000	39646	Mitochondrial import inner membrane translocase subunit TIM50 OS=Homo sapiens OX=9606 GN=TIMM50 PE=1 SV=2
P47756	41	8	8	Carbamidomethylation; Acetylation (Protein N-term)	0	1353400	24531000	54713000	168000000	7340000	31350	F-actin-capping protein subunit beta OS=Homo sapiens OX=9606 GN=CAPZB PE=1 SV=4
P0C0S5	43	13	11		30507000	9528200	45406000	181440000	367000000	34800000	13553	Histone H2A.Z OS=Homo sapiens OX=9606 GN=H2AZ1 PE=1 SV=2
Q71UI9	43	13	11		30507000	9528200	45406000	181440000	367000000	34800000	13509	Histone H2A.V OS=Homo sapiens OX=9606 GN=H2AZ2 PE=1 SV=3
Q13823	24	12	12		214710	1427500	24956000	35240000	84900000	2940000	83655	Nucleolar GTP-binding protein 2 OS=Homo sapiens OX=9606 GN=GNL2 PE=1 SV=1
Q96HE7	19	7	7		25527	0	6763100	9329600	56300000	733000	54393	ERO1-like protein alpha OS=Homo sapiens OX=9606 GN=ERO1A PE=1 SV=2
P62316	42	7	7		7225100	1329200	149520000	65326000	196000000	12600000	13527	Small nuclear ribonucleoprotein Sm D2 OS=Homo sapiens OX=9606 GN=SNRPD2 PE=1 SV=1
O00193	28	5	5	Oxidation (M)	725840	102900	21957000	29336000	28400000	1450000	20333	Small acidic protein OS=Homo sapiens OX=9606 GN=SMAP PE=1 SV=1
P50502	43	12	12	Carbamidomethylation	5008900	24612000	65099000	248590000	313000000	39800000	41332	Hsc70-interacting protein OS=Homo sapiens OX=9606 GN=ST13 PE=1 SV=2
P26583	32	9	8	Carbamidomethylation	2095300	14932000	29445000	76945000	70900000	2630000	24034	High mobility group protein B2 OS=Homo sapiens OX=9606 GN=HMGB2 PE=1 SV=2
Q8NBJ4	18	5	5		5309100	26943000	97521000	177690000	260000000	2570000	45333	Golgi membrane protein 1 OS=Homo sapiens OX=9606 GN=GOLM1 PE=1 SV=1
Q9H3N1	28	7	7		1597500	4758200	11754000	29508000	118000000	7100000	31791	Thioredoxin-related transmembrane protein 1 OS=Homo sapiens OX=9606 GN=TMX1 PE=1 SV=1
P00491	32	6	6	Acetylation (Protein N-term)	0	0	2827000	4751700	226000000	6060000	32118	Purine nucleoside phosphorylase OS=Homo sapiens OX=9606 GN=PNP PE=1 SV=2
P78417	38	10	10	Carbamidomethylation	833190	14593000	32297000	60429000	132000000	8080000	27566	Glutathione S-transferase omega-1 OS=Homo sapiens OX=9606 GN=GSTO1 PE=1 SV=2
Q5SY16	24	10	10		141130	1454400	6990000	12202000	31000000	5210000	79323	Polynucleotide 5'-hydroxyl-kinase NOL9 OS=Homo sapiens OX=9606 GN=NOL9 PE=1 SV=1
Q9Y3C1	44	8	8		4818000	3055900	14832000	37480000	84700000	49000000	21188	Nucleolar protein 16 OS=Homo sapiens OX=9606 GN=NOP16 PE=1 SV=2
Q8IWA0	16	10	10		0	195730	12145000	22389000	54100000	4930000	94499	WD repeat-containing protein 75 OS=Homo sapiens OX=9606 GN=WDR75 PE=1 SV=1
P62280	51	16	16	Carbamidomethylation; Acetylation (Protein N-term)	33429000	77026000	132280000	222460000	368000000	40400000	18431	40S ribosomal protein S11 OS=Homo sapiens OX=9606 GN=RPS11 PE=1 SV=3
P01111	46	9	4		7370800	13001000	8274600	1258000	31300000	0	21229	GTPase NRas OS=Homo sapiens OX=9606 GN=NRAS PE=1 SV=1
Q9UBU9	28	13	13		7204600	12506000	18593000	62095000	118000000	5580000	70182	Nuclear RNA export factor 1 OS=Homo sapiens OX=9606 GN=NXF1 PE=1 SV=1
Q02978	35	7	7	Acetylation (Protein N-term)	1281800	946260	6034400	12701000	18000000	12600000	34062	Mitochondrial 2-oxoglutarate/malate carrier protein OS=Homo sapiens OX=9606 GN=SLC25A11 PE=1 SV=3
P15531	53	7	3	Oxidation (M)	189240	1500300	9172400	21973000	374000000	15800000	17149	Nucleoside diphosphate kinase A OS=Homo sapiens OX=9606 GN=NME1 PE=1 SV=1
Q9UHG3	23	7	7		2735200	6234400	30098000	60369000	32100000	29200000	56640	Prenylcysteine oxidase 1 OS=Homo sapiens OX=9606 GN=PCYOX1 PE=1 SV=3
O75915	25	5	5	Acetylation (Protein N-term)	388310	2827900	38212000	73139000	77900000	2630000	21615	PRA1 family protein 3 OS=Homo sapiens OX=9606 GN=ARL6IP5 PE=1 SV=1
P30044	52	10	10	Carbamidomethylation	3481300	3411300	24047000	34242000	528000000	38400000	22086	Peroxiredoxin-5 mitochondrial OS=Homo sapiens OX=9606 GN=PRDX5 PE=1 SV=4
Q13185	36	9	8	Carbamidomethylation; Oxidation (M)	2803500	20077000	74595000	138640000	245000000	11000000	20811	Chromobox protein homolog 3 OS=Homo sapiens OX=9606 GN=CBX3 PE=1 SV=4
P56537	37	5	5	Carbamidomethylation	0	2740500	21238000	34992000	279000000	7140000	26599	Eukaryotic translation initiation factor 6 OS=Homo sapiens OX=9606 GN=EIF6 PE=1 SV=1
Q9Y277	36	6	6		1135900	2287500	23262000	40503000	111000000	696000	30659	Voltage-dependent anion-selective channel protein 3 OS=Homo sapiens OX=9606 GN=VDAC3 PE=1 SV=1
Q9Y2B0	47	7	7	Carbamidomethylation	1876300	7340500	10484000	14722000	146000000	27600000	20652	Protein canopy homolog 2 OS=Homo sapiens OX=9606 GN=CNPY2 PE=1 SV=1
P24666	46	6	6	Carbamidomethylation	1184100	5344900	31261000	38483000	127000000	5960000	18042	Low molecular weight phosphotyrosine protein phosphatase OS=Homo sapiens OX=9606 GN=ACP1 PE=1 SV=3
Q8N3C0	8	11	11		73801000	70670000	74442000	4912200	30900000	1310000	251458	Activating signal cointegrator 1 complex subunit 3 OS=Homo sapiens OX=9606 GN=ASCC3 PE=1 SV=3
P0CL82	84	7	2	Carbamidomethylation	0	0	59777000	50414000	0	0	12978	G antigen 12I OS=Homo sapiens OX=9606 GN=GAGE12I PE=1 SV=1
P0CL80	84	7	2	Carbamidomethylation	0	0	59777000	50414000	0	0	12978	G antigen 12F OS=Homo sapiens OX=9606 GN=GAGE12F PE=3 SV=1
P0CL81	84	7	2	Carbamidomethylation	0	0	59777000	50414000	0	0	12978	G antigen 12G OS=Homo sapiens OX=9606 GN=GAGE12G PE=3 SV=1
O76087	84	7	2	Carbamidomethylation	0	0	59777000	50414000	0	0	12978	G antigen 7 OS=Homo sapiens OX=9606 GN=GAGE7 PE=2 SV=1
Q9Y3B7	52	9	9		138500	2532400	12711000	23629000	122000000	28300000	20683	39S ribosomal protein L11 mitochondrial OS=Homo sapiens OX=9606 GN=MRPL11 PE=1 SV=1
Q8WXX5	40	10	10		4634400	3398900	14677000	38866000	134000000	12700000	29910	DnaJ homolog subfamily C member 9 OS=Homo sapiens OX=9606 GN=DNAJC9 PE=1 SV=1
O15160	32	8	8	Acetylation (Protein N-term)	934200	2229200	9061000	10737000	22000000	5150000	39250	DNA-directed RNA polymerases I and III subunit RPAC1 OS=Homo sapiens OX=9606 GN=POLR1C PE=1 SV=1
P62491	39	9	8	Acetylation (Protein N-term)	1937800	6952400	21760000	40992000	254000000	23100000	24394	Ras-related protein Rab-11A OS=Homo sapiens OX=9606 GN=RAB11A PE=1 SV=3
Q15907	39	9	8	Acetylation (Protein N-term)	1937800	6952400	21760000	40992000	254000000	23100000	24488	Ras-related protein Rab-11B OS=Homo sapiens OX=9606 GN=RAB11B PE=1 SV=4
Q96KB5	20	9	9	Carbamidomethylation; Acetylation (Protein N-term)	7895000	6332200	26061000	38417000	20400000	30600000	36085	Lymphokine-activated killer T-cell-originated protein kinase OS=Homo sapiens OX=9606 GN=PBK PE=1 SV=3
Q16822	22	10	10		30120	0	8051500	11828000	88200000	5630000	70699	Phosphoenolpyruvate carboxykinase [GTP] mitochondrial OS=Homo sapiens OX=9606 GN=PCK2 PE=1 SV=4
P18031	18	6	6	Acetylation (Protein N-term)	4841500	8695000	16216000	25753000	39200000	15700000	49967	Tyrosine-protein phosphatase non-receptor type 1 OS=Homo sapiens OX=9606 GN=PTPN1 PE=1 SV=1
Q6IAA8	65	7	7		579660	1414600	10830000	23174000	141000000	7520000	17745	Ragulator complex protein LAMTOR1 OS=Homo sapiens OX=9606 GN=LAMTOR1 PE=1 SV=2
Q9BZZ5	19	7	7		280710	1436600	22603000	27047000	85900000	2540000	59005	Apoptosis inhibitor 5 OS=Homo sapiens OX=9606 GN=API5 PE=1 SV=3
O00505	15	6	3	Acetylation (Protein N-term)	0	0	20890000	14611000	1640000	0	57811	Importin subunit alpha-4 OS=Homo sapiens OX=9606 GN=KPNA3 PE=1 SV=2
Q9NV31	53	7	7		5741600	31194000	53124000	106300000	157000000	14700000	21850	U3 small nucleolar ribonucleoprotein protein IMP3 OS=Homo sapiens OX=9606 GN=IMP3 PE=1 SV=1
P18085	52	8	4		0	0	3802000	20097000	200000000	3060000	20511	ADP-ribosylation factor 4 OS=Homo sapiens OX=9606 GN=ARF4 PE=1 SV=3
O14929	21	6	6	Carbamidomethylation	0	0	5796800	11036000	58300000	22800000	49513	Histone acetyltransferase type B catalytic subunit OS=Homo sapiens OX=9606 GN=HAT1 PE=1 SV=1
Q99615	20	6	6	Carbamidomethylation; Acetylation (Protein N-term)	75537	172750	7991100	9371200	54300000	7420000	56441	DnaJ homolog subfamily C member 7 OS=Homo sapiens OX=9606 GN=DNAJC7 PE=1 SV=2
Q15269	10	8	8		5086900	463980	10599000	6188700	30200000	287000	102452	Periodic tryptophan protein 2 homolog OS=Homo sapiens OX=9606 GN=PWP2 PE=2 SV=2
Q7L2H7	30	6	6	Carbamidomethylation; Acetylation (Protein N-term)	4449800	114750	8440400	14180000	149000000	2920000	42503	Eukaryotic translation initiation factor 3 subunit M OS=Homo sapiens OX=9606 GN=EIF3M PE=1 SV=1
Q15287	20	4	4		122690	774090	15149000	17536000	79400000	2700000	34208	RNA-binding protein with serine-rich domain 1 OS=Homo sapiens OX=9606 GN=RNPS1 PE=1 SV=1
P39687	43	14	7	Carbamidomethylation	8878600	17964000	23796000	42694000	207000000	63300000	28585	Acidic leucine-rich nuclear phosphoprotein 32 family member A OS=Homo sapiens OX=9606 GN=ANP32A PE=1 SV=1
P12429	45	10	10		756310	8011300	46070000	74207000	180000000	8400000	36375	Annexin A3 OS=Homo sapiens OX=9606 GN=ANXA3 PE=1 SV=3
O75400	15	11	11		1328800	591120	15241000	77105000	75000000	34700000	108805	Pre-mRNA-processing factor 40 homolog A OS=Homo sapiens OX=9606 GN=PRPF40A PE=1 SV=2
Q8NBJ7	29	7	7		1359900	34226000	43037000	68325000	38000000	140000	33843	Inactive C-alpha-formylglycine-generating enzyme 2 OS=Homo sapiens OX=9606 GN=SUMF2 PE=1 SV=2
P20340	39	8	8	Acetylation (Protein N-term)	4351700	4715300	9395100	14552000	97000000	15800000	23593	Ras-related protein Rab-6A OS=Homo sapiens OX=9606 GN=RAB6A PE=1 SV=3
P21399	14	7	7	Acetylation (Protein N-term)	0	2963700	5751100	5919400	81600000	12200000	98399	Cytoplasmic aconitate hydratase OS=Homo sapiens OX=9606 GN=ACO1 PE=1 SV=3
P31949	66	9	9	Carbamidomethylation	238550	33904000	155380000	257420000	873000000	46500000	11740	Protein S100-A11 OS=Homo sapiens OX=9606 GN=S100A11 PE=1 SV=2
Q8WW12	31	4	4		575130	4789200	12886000	25865000	96800000	3300000	18925	PEST proteolytic signal-containing nuclear protein OS=Homo sapiens OX=9606 GN=PCNP PE=1 SV=2
P62857	64	10	10	Acetylation (Protein N-term)	75614000	8101500	42592000	109350000	328000000	16900000	7841	40S ribosomal protein S28 OS=Homo sapiens OX=9606 GN=RPS28 PE=1 SV=1
O75832	48	7	7	Carbamidomethylation	2771300	2180600	6611400	15074000	51000000	2770000	24428	26S proteasome non-ATPase regulatory subunit 10 OS=Homo sapiens OX=9606 GN=PSMD10 PE=1 SV=1
Q92979	51	8	8	Acetylation (Protein N-term)	3208000	11008000	58446000	71308000	434000000	22900000	26720	Ribosomal RNA small subunit methyltransferase NEP1 OS=Homo sapiens OX=9606 GN=EMG1 PE=1 SV=4
Q9P035	29	7	7	Acetylation (Protein N-term)	4376100	7862900	17644000	14743000	51600000	905000000	43160	Very-long-chain (3R)-3-hydroxyacyl-CoA dehydratase 3 OS=Homo sapiens OX=9606 GN=HACD3 PE=1 SV=2
P23229	13	8	8		1682000	4199400	39874000	25874000	72100000	6850000	126605	Integrin alpha-6 OS=Homo sapiens OX=9606 GN=ITGA6 PE=1 SV=5
P43490	37	10	10	Acetylation (Protein N-term)	1238100	488750	2888700	13522000	123000000	685000000	55521	Nicotinamide phosphoribosyltransferase OS=Homo sapiens OX=9606 GN=NAMPT PE=1 SV=1
O00422	63	8	8	Carbamidomethylation	23528000	3519200	11588000	24791000	60300000	4270000	17561	Histone deacetylase complex subunit SAP18 OS=Homo sapiens OX=9606 GN=SAP18 PE=1 SV=1
Q9Y2R9	43	9	9		0	4765800	17327000	21562000	83700000	15500000	28134	28S ribosomal protein S7 mitochondrial OS=Homo sapiens OX=9606 GN=MRPS7 PE=1 SV=2
Q9H3U1	6	4	4		11344000	772280	10031000	3222600	13600000	171000000	103077	Protein unc-45 homolog A OS=Homo sapiens OX=9606 GN=UNC45A PE=1 SV=1
Q9UBB4	25	8	8	Carbamidomethylation	5680500	1513600	8945200	15361000	100000000	4070000	53489	Ataxin-10 OS=Homo sapiens OX=9606 GN=ATXN10 PE=1 SV=1
O14950	39	5	5		481700	584580	20802000	32211000	107000000	6470000	19779	Myosin regulatory light chain 12B OS=Homo sapiens OX=9606 GN=MYL12B PE=1 SV=2
P19105	39	5	5		481700	584580	20802000	32211000	0	0	19794	Myosin regulatory light chain 12A OS=Homo sapiens OX=9606 GN=MYL12A PE=1 SV=2
P37837	31	13	13	Carbamidomethylation; Acetylation (Protein N-term)	1843100	11376000	25459000	75534000	460000000	28100000	37540	Transaldolase OS=Homo sapiens OX=9606 GN=TALDO1 PE=1 SV=2
P22061	41	4	4		0	0	5443200	1316000	48900000	600000	24636	Protein-L-isoaspartate(D-aspartate) O-methyltransferase OS=Homo sapiens OX=9606 GN=PCMT1 PE=1 SV=4
P51571	32	6	6		329050	891100	8146600	17814000	329000000	33400000	18999	Translocon-associated protein subunit delta OS=Homo sapiens OX=9606 GN=SSR4 PE=1 SV=1
Q6UN15	21	8	8		161470	1332300	11209000	6170000	16400000	343000	66526	Pre-mRNA 3'-end-processing factor FIP1 OS=Homo sapiens OX=9606 GN=FIP1L1 PE=1 SV=1
Q96E11	37	7	7		6983900	0	9664100	17362000	101000000	81100000	29277	Ribosome-recycling factor mitochondrial OS=Homo sapiens OX=9606 GN=MRRF PE=1 SV=1
Q9Y5K5	50	10	10	Carbamidomethylation	14002000	36242000	11558000	15032000	29000000	5050000	37607	Ubiquitin carboxyl-terminal hydrolase isozyme L5 OS=Homo sapiens OX=9606 GN=UCHL5 PE=1 SV=3
P20073	22	8	8	Carbamidomethylation	3169000	18597000	95310000	93980000	253000000	3150000	52739	Annexin A7 OS=Homo sapiens OX=9606 GN=ANXA7 PE=1 SV=3
Q14134	27	10	10		66206	2421700	13354000	35807000	75200000	5630000	65835	Tripartite motif-containing protein 29 OS=Homo sapiens OX=9606 GN=TRIM29 PE=1 SV=2
Q9H8H0	16	7	7	Acetylation (Protein N-term)	658490	5163300	15586000	21167000	28300000	4510000	81124	Nucleolar protein 11 OS=Homo sapiens OX=9606 GN=NOL11 PE=1 SV=1
O75431	29	5	5		0	1213200	11247000	18999000	78300000	5270000	29763	Metaxin-2 OS=Homo sapiens OX=9606 GN=MTX2 PE=1 SV=1
Q9H3K6	80	6	6	Carbamidomethylation; Acetylation (Protein N-term)	7852200	13376000	58421000	78692000	71200000	3490000	10117	BolA-like protein 2 OS=Homo sapiens OX=9606 GN=BOLA2 PE=1 SV=1
P61020	42	9	4		1491000	5451600	9899500	17205000	36900000	1230000	23707	Ras-related protein Rab-5B OS=Homo sapiens OX=9606 GN=RAB5B PE=1 SV=1
O43681	34	9	9	Carbamidomethylation	920540	34100	17099000	30892000	53200000	20300000	38793	ATPase GET3 OS=Homo sapiens OX=9606 GN=GET3 PE=1 SV=2
P33316	31	7	7	Carbamidomethylation	1986100	3475500	24089000	30551000	177000000	2660000	26563	Deoxyuridine 5'-triphosphate nucleotidohydrolase mitochondrial OS=Homo sapiens OX=9606 GN=DUT PE=1 SV=4
P62495	22	7	7	Oxidation (M); Acetylation (Protein N-term)	3955600	6155200	28541000	36392000	182000000	28400000	49031	Eukaryotic peptide chain release factor subunit 1 OS=Homo sapiens OX=9606 GN=ETF1 PE=1 SV=3
P82650	26	7	7		0	22373	14688000	28122000	63200000	8940000	41280	28S ribosomal protein S22 mitochondrial OS=Homo sapiens OX=9606 GN=MRPS22 PE=1 SV=1
Q14019	46	7	7	Carbamidomethylation	2211100	1322000	31749000	40502000	211000000	8140000	15945	Coactosin-like protein OS=Homo sapiens OX=9606 GN=COTL1 PE=1 SV=3
Q9HCU5	16	4	4		0	2423800	12713000	18321000	86300000	2540000	45468	Prolactin regulatory element-binding protein OS=Homo sapiens OX=9606 GN=PREB PE=1 SV=2
Q96QR8	41	5	5		0	0	4101100	5365000	37400000	2320000	33241	Transcriptional activator protein Pur-beta OS=Homo sapiens OX=9606 GN=PURB PE=1 SV=3
P40938	32	7	7	Carbamidomethylation	0	3401000	7148900	6815500	13700000	567000	40556	Replication factor C subunit 3 OS=Homo sapiens OX=9606 GN=RFC3 PE=1 SV=2
P35268	40	9	9		9029400	37742000	108180000	182500000	548000000	37300000	14787	60S ribosomal protein L22 OS=Homo sapiens OX=9606 GN=RPL22 PE=1 SV=2
Q8WUA4	14	7	7		0	0	9028600	15673000	46600000	845000	100680	General transcription factor 3C polypeptide 2 OS=Homo sapiens OX=9606 GN=GTF3C2 PE=1 SV=2
Q16850	16	6	6		0	11385000	23508000	4760900	31100000	15000000	56806	Lanosterol 14-alpha demethylase OS=Homo sapiens OX=9606 GN=CYP51A1 PE=1 SV=3
P63151	32	12	12		842680	3051900	18486000	23621000	74000000	416000000	51692	Serine/threonine-protein phosphatase 2A 55 kDa regulatory subunit B alpha isoform OS=Homo sapiens OX=9606 GN=PPP2R2A PE=1 SV=1
P55786	18	9	9		0	3210700	16308000	11348000	29700000	2780000	103276	Puromycin-sensitive aminopeptidase OS=Homo sapiens OX=9606 GN=NPEPPS PE=1 SV=2
P07108	78	4	4	Acetylation (Protein N-term)	4649800	2977000	14445000	15904000	436000000	21300000	10044	Acyl-CoA-binding protein OS=Homo sapiens OX=9606 GN=DBI PE=1 SV=2
P17931	34	7	7		2057100	7051200	19832000	49681000	137000000	2640000	26152	Galectin-3 OS=Homo sapiens OX=9606 GN=LGALS3 PE=1 SV=5
P26447	76	14	14	Carbamidomethylation	27035000	48213000	157460000	360130000	1210000000	54500000	11729	Protein S100-A4 OS=Homo sapiens OX=9606 GN=S100A4 PE=1 SV=1
P25815	39	7	7		854660	3845200	33121000	92990000	81600000	4500000	10400	Protein S100-P OS=Homo sapiens OX=9606 GN=S100P PE=1 SV=2
Q86XZ4	14	5	5		0	1196800	9519700	13541000	18700000	1380000	59545	Spermatogenesis-associated serine-rich protein 2 OS=Homo sapiens OX=9606 GN=SPATS2 PE=1 SV=1
P63000	31	7	6	Carbamidomethylation	0	774110	14782000	32185000	136000000	19200000	21450	Ras-related C3 botulinum toxin substrate 1 OS=Homo sapiens OX=9606 GN=RAC1 PE=1 SV=1
Q14165	46	8	8		3531200	4941400	23041000	101550000	56200000	1590000	32234	Malectin OS=Homo sapiens OX=9606 GN=MLEC PE=1 SV=1
O15381	15	8	8	Carbamidomethylation	0	453660	11538000	22384000	43000000	2230000	95051	Nuclear valosin-containing protein-like OS=Homo sapiens OX=9606 GN=NVL PE=1 SV=1
P14927	43	5	5		2869000	12608000	61563000	49092000	75300000	15400000	13530	Cytochrome b-c1 complex subunit 7 OS=Homo sapiens OX=9606 GN=UQCRB PE=1 SV=2
Q9Y6M9	49	6	6	Acetylation (Protein N-term)	6932800	1236400	5087000	7922900	160000000	8900000	21831	NADH dehydrogenase [ubiquinone] 1 beta subcomplex subunit 9 OS=Homo sapiens OX=9606 GN=NDUFB9 PE=1 SV=3
Q8WU90	26	9	9		1361300	11318000	46517000	91900000	51200000	4110000	48603	Zinc finger CCCH domain-containing protein 15 OS=Homo sapiens OX=9606 GN=ZC3H15 PE=1 SV=1
P50995	27	12	11	Carbamidomethylation	1340400	3888000	14169000	25711000	116000000	20700000	54390	Annexin A11 OS=Homo sapiens OX=9606 GN=ANXA11 PE=1 SV=1
Q16630	11	6	6		319510	2869400	6741900	14269000	123000000	10100000	59210	Cleavage and polyadenylation specificity factor subunit 6 OS=Homo sapiens OX=9606 GN=CPSF6 PE=1 SV=2
O95478	28	6	6		3458800	4169600	106100000	140910000	453000000	4510000	30065	Ribosome biogenesis protein NSA2 homolog OS=Homo sapiens OX=9606 GN=NSA2 PE=1 SV=1
P19387	21	3	3		0	0	402270	10867000	6960000	137000	31441	DNA-directed RNA polymerase II subunit RPB3 OS=Homo sapiens OX=9606 GN=POLR2C PE=1 SV=2
Q9NZL9	22	4	4		0	0	1661700	4531700	50900000	3040000	37552	Methionine adenosyltransferase 2 subunit beta OS=Homo sapiens OX=9606 GN=MAT2B PE=1 SV=1
Q9UJA5	21	6	6		0	97996	4600500	5688600	121000000	3620000	55799	tRNA (adenine(58)-N(1))-methyltransferase non-catalytic subunit TRM6 OS=Homo sapiens OX=9606 GN=TRMT6 PE=1 SV=1
Q9NX63	22	5	5		0	3738000	15906000	11097000	127000000	9600000	26152	MICOS complex subunit MIC19 OS=Homo sapiens OX=9606 GN=CHCHD3 PE=1 SV=1
Q93008	3	5	5		656770	829370	4874600	8602300	19800000	539000	290461	Probable ubiquitin carboxyl-terminal hydrolase FAF-X OS=Homo sapiens OX=9606 GN=USP9X PE=1 SV=4
Q9BW27	14	6	6	Acetylation (Protein N-term)	1601700	4286700	22490000	41751000	39000000	2350000	75019	Nuclear pore complex protein Nup85 OS=Homo sapiens OX=9606 GN=NUP85 PE=1 SV=1
P13489	23	7	7	Carbamidomethylation	2562900	1748200	16434000	39471000	377000000	51200000	49974	Ribonuclease inhibitor OS=Homo sapiens OX=9606 GN=RNH1 PE=1 SV=2
Q15758	15	8	8		1965400	6482700	43872000	87390000	573000000	8230000	56598	Neutral amino acid transporter B(0) OS=Homo sapiens OX=9606 GN=SLC1A5 PE=1 SV=2
Q8TC12	23	6	6		573200	6368300	18548000	29032000	10400000	0	35386	Retinol dehydrogenase 11 OS=Homo sapiens OX=9606 GN=RDH11 PE=1 SV=2
Q9H3P2	23	5	5		4109600	5815300	9996900	14961000	3890000	0	57277	Negative elongation factor A OS=Homo sapiens OX=9606 GN=NELFA PE=1 SV=3
Q15369	46	5	5		0	9708900	20302000	29215000	95200000	3190000	12473	Elongin-C OS=Homo sapiens OX=9606 GN=ELOC PE=1 SV=1
Q92576	6	6	6		0	0	2312600	8718600	16300000	0	229479	PHD finger protein 3 OS=Homo sapiens OX=9606 GN=PHF3 PE=1 SV=3
Q9BWM7	24	6	6		0	2387400	10039000	8983100	44700000	2430000	35503	Sideroflexin-3 OS=Homo sapiens OX=9606 GN=SFXN3 PE=1 SV=3
Q9H7B2	32	9	9		1136800	9443300	53099000	46227000	50500000	4650000	35583	Ribosome production factor 2 homolog OS=Homo sapiens OX=9606 GN=RPF2 PE=1 SV=2
O94842	15	5	5		0	3896900	14605000	26480000	9850000	364000	66195	TOX high mobility group box family member 4 OS=Homo sapiens OX=9606 GN=TOX4 PE=1 SV=1
Q9HC35	12	6	6	Carbamidomethylation	2204300	1738100	14349000	11483000	3860000	8840000	108916	Echinoderm microtubule-associated protein-like 4 OS=Homo sapiens OX=9606 GN=EML4 PE=1 SV=3
O14818	52	11	11		2982800	5850900	16779000	26365000	54600000	4400000	27887	Proteasome subunit alpha type-7 OS=Homo sapiens OX=9606 GN=PSMA7 PE=1 SV=1
P67775	32	6	6	Carbamidomethylation	67374	0	14747000	27515000	139000000	367000	35594	Serine/threonine-protein phosphatase 2A catalytic subunit alpha isoform OS=Homo sapiens OX=9606 GN=PPP2CA PE=1 SV=1
Q96HS1	36	8	8		0	9630100	11063000	35002000	64000000	3590000	32004	Serine/threonine-protein phosphatase PGAM5 mitochondrial OS=Homo sapiens OX=9606 GN=PGAM5 PE=1 SV=2
P02768	6	6	6	Carbamidomethylation	37934000	65602000	280070000	215550000	352000000	71500000	69367	Albumin OS=Homo sapiens OX=9606 GN=ALB PE=1 SV=2
P45973	40	8	8		1225000	2423000	28164000	22261000	44700000	1640000	22225	Chromobox protein homolog 5 OS=Homo sapiens OX=9606 GN=CBX5 PE=1 SV=1
P56545	32	6	4		0	216990	11060000	4462100	20600000	549000	48945	C-terminal-binding protein 2 OS=Homo sapiens OX=9606 GN=CTBP2 PE=1 SV=1
Q96CW1	20	6	6	Carbamidomethylation	0	1944800	21975000	55533000	48300000	937000	49655	AP-2 complex subunit mu OS=Homo sapiens OX=9606 GN=AP2M1 PE=1 SV=2
Q02543	39	11	11	Carbamidomethylation	22386000	10202000	42811000	36294000	440000000	12500000	20762	60S ribosomal protein L18a OS=Homo sapiens OX=9606 GN=RPL18A PE=1 SV=2
P11166	13	6	6		28128000	70706000	41665000	92552000	31000000	5840000	54084	Solute carrier family 2 facilitated glucose transporter member 1 OS=Homo sapiens OX=9606 GN=SLC2A1 PE=1 SV=2
O75717	10	7	7	Carbamidomethylation	589920	0	3226800	4814900	8580000	28300	125967	WD repeat and HMG-box DNA-binding protein 1 OS=Homo sapiens OX=9606 GN=WDHD1 PE=1 SV=1
Q05048	23	6	6		3339000	6436600	10468000	16080000	52200000	2120000	48358	Cleavage stimulation factor subunit 1 OS=Homo sapiens OX=9606 GN=CSTF1 PE=1 SV=1
Q16401	29	11	11	Acetylation (Protein N-term)	268360	4564000	34907000	42185000	164000000	8420000	56196	26S proteasome non-ATPase regulatory subunit 5 OS=Homo sapiens OX=9606 GN=PSMD5 PE=1 SV=3
P78406	30	6	6		10387000	11931000	18214000	21279000	87700000	2940000	40968	mRNA export factor OS=Homo sapiens OX=9606 GN=RAE1 PE=1 SV=1
P61604	66	9	9		0	2061700	11281000	16454000	70200000	14900000	10932	10 kDa heat shock protein mitochondrial OS=Homo sapiens OX=9606 GN=HSPE1 PE=1 SV=2
P40261	25	5	5	Acetylation (Protein N-term)	1224500	1362100	11535000	23768000	12200000	5910000	29574	Nicotinamide N-methyltransferase OS=Homo sapiens OX=9606 GN=NNMT PE=1 SV=1
O43396	29	5	5		8842300	11067000	20097000	24669000	153000000	7450000	32251	Thioredoxin-like protein 1 OS=Homo sapiens OX=9606 GN=TXNL1 PE=1 SV=3
P62847	44	9	9	Oxidation (M); Acetylation (Protein N-term)	20217000	35805000	91092000	129800000	487000000	19400000	15423	40S ribosomal protein S24 OS=Homo sapiens OX=9606 GN=RPS24 PE=1 SV=1
Q86TC9	7	4	4	Carbamidomethylation	0	0	5507300	5228500	984000	0	145257	Myopalladin OS=Homo sapiens OX=9606 GN=MYPN PE=1 SV=2
P09543	24	7	7		1746500	1036800	4040900	8779700	34800000	1110000	47579	2' 3'-cyclic-nucleotide 3'-phosphodiesterase OS=Homo sapiens OX=9606 GN=CNP PE=1 SV=2
O00629	28	9	6	Carbamidomethylation; Acetylation (Protein N-term)	1020900	9175500	14961000	31144000	52900000	2110000	57887	Importin subunit alpha-3 OS=Homo sapiens OX=9606 GN=KPNA4 PE=1 SV=1
Q96FQ6	57	7	7		2639100	17565000	38230000	69826000	96200000	7000000	11801	Protein S100-A16 OS=Homo sapiens OX=9606 GN=S100A16 PE=1 SV=1
P60981	32	4	4	Carbamidomethylation; Acetylation (Protein N-term)	0	3187800	12469000	32105000	382000000	11900000	18506	Destrin OS=Homo sapiens OX=9606 GN=DSTN PE=1 SV=3
P07741	59	9	9	Carbamidomethylation; Acetylation (Protein N-term)	6456400	15132000	31581000	48044000	244000000	13000000	19608	Adenine phosphoribosyltransferase OS=Homo sapiens OX=9606 GN=APRT PE=1 SV=2
Q13243	28	6	5	Carbamidomethylation	1361300	330420	1944900	9675800	61200000	12400000	31264	Serine/arginine-rich splicing factor 5 OS=Homo sapiens OX=9606 GN=SRSF5 PE=1 SV=1
O00487	25	4	4		0	975430	13226000	14697000	31300000	2310000	34577	26S proteasome non-ATPase regulatory subunit 14 OS=Homo sapiens OX=9606 GN=PSMD14 PE=1 SV=1
Q9NZ01	25	10	10	Carbamidomethylation	30077000	56177000	7625200	24424000	284000000	21400000	36034	Very-long-chain enoyl-CoA reductase OS=Homo sapiens OX=9606 GN=TECR PE=1 SV=1
Q8ND56	25	7	7	Carbamidomethylation	0	0	8383500	28265000	5690000	6320000	50530	Protein LSM14 homolog A OS=Homo sapiens OX=9606 GN=LSM14A PE=1 SV=3
P41236	63	6	6	Carbamidomethylation; Acetylation (Protein N-term)	2927000	11110000	8936000	20935000	54500000	1840000	23015	Protein phosphatase inhibitor 2 OS=Homo sapiens OX=9606 GN=PPP1R2 PE=1 SV=2
P58546	39	4	4	Carbamidomethylation; Acetylation (Protein N-term)	0	2278600	18827000	16057000	215000000	8270000	12895	Myotrophin OS=Homo sapiens OX=9606 GN=MTPN PE=1 SV=2
Q08380	15	6	6		0	196520	9361600	24483000	5730000	86300	65331	Galectin-3-binding protein OS=Homo sapiens OX=9606 GN=LGALS3BP PE=1 SV=1
Q8WUX1	15	6	6		0	21487000	74822000	90773000	44000000	714000	51457	Sodium-coupled neutral amino acid transporter 5 OS=Homo sapiens OX=9606 GN=SLC38A5 PE=1 SV=1
Q8NBS9	25	11	11		5663600	15176000	71888000	103160000	554000000	26500000	47629	Thioredoxin domain-containing protein 5 OS=Homo sapiens OX=9606 GN=TXNDC5 PE=1 SV=2
Q15651	42	6	5		14337000	0	12237000	27492000	1530000	103000	10666	High mobility group nucleosome-binding domain-containing protein 3 OS=Homo sapiens OX=9606 GN=HMGN3 PE=1 SV=2
Q8NHM4	24	10	4	Carbamidomethylation	29291000	1150900	27222000	63705000	2580000	0	26537	Putative trypsin-6 OS=Homo sapiens OX=9606 GN=PRSS3P2 PE=5 SV=2
P20618	35	6	6		615410	200620	7607700	7717100	24200000	157000	26489	Proteasome subunit beta type-1 OS=Homo sapiens OX=9606 GN=PSMB1 PE=1 SV=2
O00273	25	5	5	Carbamidomethylation; Acetylation (Protein N-term)	596920	1189500	6832300	11584000	9540000	572000	36522	DNA fragmentation factor subunit alpha OS=Homo sapiens OX=9606 GN=DFFA PE=1 SV=1
P62851	34	9	9		1714600	20093000	57696000	128120000	497000000	25200000	13742	40S ribosomal protein S25 OS=Homo sapiens OX=9606 GN=RPS25 PE=1 SV=1
Q13630	29	7	7		6335000	6003400	12837000	19828000	35100000	3770000	35893	GDP-L-fucose synthase OS=Homo sapiens OX=9606 GN=GFUS PE=1 SV=1
P42766	30	5	5		16211000	90566000	49641000	73901000	193000000	16000000	14551	60S ribosomal protein L35 OS=Homo sapiens OX=9606 GN=RPL35 PE=1 SV=2
Q9Y5S9	51	4	4	Acetylation (Protein N-term)	2975100	8126700	23287000	37493000	98200000	4340000	19889	RNA-binding protein 8A OS=Homo sapiens OX=9606 GN=RBM8A PE=1 SV=1
Q02818	28	9	8		2774500	60852000	44552000	127680000	85700000	10300000	53879	Nucleobindin-1 OS=Homo sapiens OX=9606 GN=NUCB1 PE=1 SV=4
O60701	18	6	6		165240	3228300	12816000	19984000	1390000000	65500000	55024	UDP-glucose 6-dehydrogenase OS=Homo sapiens OX=9606 GN=UGDH PE=1 SV=1
P30260	18	5	5		470180	0	1685800	4490300	0	441000	91867	Cell division cycle protein 27 homolog OS=Homo sapiens OX=9606 GN=CDC27 PE=1 SV=2
Q13619	18	10	7	Acetylation (Protein N-term)	2049200	1130800	6620800	18449000	40900000	10900000	87680	Cullin-4A OS=Homo sapiens OX=9606 GN=CUL4A PE=1 SV=3
Q53GS7	13	5	5		583770	3902600	22862000	20934000	16700000	2110000	79836	Nucleoporin GLE1 OS=Homo sapiens OX=9606 GN=GLE1 PE=1 SV=2
Q9UMY4	30	5	5		2557200	3926100	9914300	22623000	11900000	298000	18885	Sorting nexin-12 OS=Homo sapiens OX=9606 GN=SNX12 PE=1 SV=4
Q01085	14	4	4		2825600	12148000	2983000	4806800	40600000	1330000	41591	Nucleolysin TIAR OS=Homo sapiens OX=9606 GN=TIAL1 PE=1 SV=1
Q71UM5	32	7	2		0	0	13149000	16419000	39600000	1970000	9477	40S ribosomal protein S27-like OS=Homo sapiens OX=9606 GN=RPS27L PE=1 SV=3
P46459	14	8	8		6069400	27339000	18172000	28442000	14200000	1150000	82594	Vesicle-fusing ATPase OS=Homo sapiens OX=9606 GN=NSF PE=1 SV=3
Q00059	34	8	8		14659000	13192000	55964000	108370000	176000000	8210000	29097	Transcription factor A mitochondrial OS=Homo sapiens OX=9606 GN=TFAM PE=1 SV=1
Q10570	10	8	8		590250	3051900	9518100	13432000	14100000	621000	160883	Cleavage and polyadenylation specificity factor subunit 1 OS=Homo sapiens OX=9606 GN=CPSF1 PE=1 SV=2
Q9UNH7	14	6	6	Oxidation (M); Acetylation (Protein N-term)	113450	0	1836800	228310000	389000000	7710000	46649	Sorting nexin-6 OS=Homo sapiens OX=9606 GN=SNX6 PE=1 SV=1
P42677	32	9	4		2066000	13075000	31018000	59013000	143000000	8700000	9461	40S ribosomal protein S27 OS=Homo sapiens OX=9606 GN=RPS27 PE=1 SV=3
P61964	28	7	7	Acetylation (Protein N-term)	0	1862100	17160000	31983000	25700000	477000	36589	WD repeat-containing protein 5 OS=Homo sapiens OX=9606 GN=WDR5 PE=1 SV=1
P83731	28	8	8	Oxidation (M)	3242800	10102000	41583000	62169000	286000000	25900000	17779	60S ribosomal protein L24 OS=Homo sapiens OX=9606 GN=RPL24 PE=1 SV=1
Q92878	8	6	6		0	0	1999800	3194000	17900000	8300000	153892	DNA repair protein RAD50 OS=Homo sapiens OX=9606 GN=RAD50 PE=1 SV=1
P35610	13	7	7	Carbamidomethylation	867530	612410	8341800	16257000	35200000	12600000	64735	Sterol O-acyltransferase 1 OS=Homo sapiens OX=9606 GN=SOAT1 PE=1 SV=3
Q99471	46	5	5	Acetylation (Protein N-term)	173780	871250	10401000	19581000	91400000	3660000	17328	Prefoldin subunit 5 OS=Homo sapiens OX=9606 GN=PFDN5 PE=1 SV=2
P52815	41	7	7	Oxidation (M)	74585	563380	5016000	4753300	98800000	4020000	21348	39S ribosomal protein L12 mitochondrial OS=Homo sapiens OX=9606 GN=MRPL12 PE=1 SV=2
Q9NP97	88	6	6	Acetylation (Protein N-term)	5189600	9444200	19710000	32705000	71200000	348000	10922	Dynein light chain roadblock-type 1 OS=Homo sapiens OX=9606 GN=DYNLRB1 PE=1 SV=3
P46776	32	6	6	Carbamidomethylation	10186000	43780000	107020000	174770000	424000000	30000000	16561	60S ribosomal protein L27a OS=Homo sapiens OX=9606 GN=RPL27A PE=1 SV=2
Q9Y4P3	14	4	4		0	1846900	4898900	8423700	41900000	1320000	49798	Transducin beta-like protein 2 OS=Homo sapiens OX=9606 GN=TBL2 PE=1 SV=1
Q15006	17	4	4		3392800	21285000	37812000	70163000	19600000	4450000	34833	ER membrane protein complex subunit 2 OS=Homo sapiens OX=9606 GN=EMC2 PE=1 SV=1
O00233	52	5	5	Carbamidomethylation	0	0	2381600	12772000	7280000	328000	24682	26S proteasome non-ATPase regulatory subunit 9 OS=Homo sapiens OX=9606 GN=PSMD9 PE=1 SV=3
Q13595	24	8	5		2677800	22410000	48270000	66411000	29800000	18600000	32689	Transformer-2 protein homolog alpha OS=Homo sapiens OX=9606 GN=TRA2A PE=1 SV=1
P46781	41	11	11		563570	5596200	65508000	146680000	668000000	29000000	22591	40S ribosomal protein S9 OS=Homo sapiens OX=9606 GN=RPS9 PE=1 SV=3
Q9H089	13	6	6	Carbamidomethylation	697940	7975100	17259000	32468000	53000000	2030000	75225	Large subunit GTPase 1 homolog OS=Homo sapiens OX=9606 GN=LSG1 PE=1 SV=2
O15427	14	6	6		8164100	298040	38568000	76442000	73300000	2660000	49469	Monocarboxylate transporter 4 OS=Homo sapiens OX=9606 GN=SLC16A3 PE=1 SV=1
P09496	24	8	8		1484600	16040000	73482000	135690000	137000000	6810000	27077	Clathrin light chain A OS=Homo sapiens OX=9606 GN=CLTA PE=1 SV=1
Q9H3S7	7	5	5		122440	113120	2029300	2725400	624000	835000	178972	Tyrosine-protein phosphatase non-receptor type 23 OS=Homo sapiens OX=9606 GN=PTPN23 PE=1 SV=1
Q9BTT0	24	6	6		0	0	36528000	41079000	188000000	4340000	30692	Acidic leucine-rich nuclear phosphoprotein 32 family member E OS=Homo sapiens OX=9606 GN=ANP32E PE=1 SV=1
P63173	56	6	6		1650100	76504	12221000	23954000	254000000	3480000	8218	60S ribosomal protein L38 OS=Homo sapiens OX=9606 GN=RPL38 PE=1 SV=2
Q6GMV3	38	5	5	Acetylation (Protein N-term)	0	641830	18614000	14235000	0	4660000	15805	Putative peptidyl-tRNA hydrolase PTRHD1 OS=Homo sapiens OX=9606 GN=PTRHD1 PE=1 SV=1
P50213	28	7	7		60168	5006100	10689000	4470100	57100000	2090000	39592	Isocitrate dehydrogenase [NAD] subunit alpha mitochondrial OS=Homo sapiens OX=9606 GN=IDH3A PE=1 SV=1
Q15382	34	5	5		5909500	8159700	35252000	9561400	71700000	2590000	20497	GTP-binding protein Rheb OS=Homo sapiens OX=9606 GN=RHEB PE=1 SV=1
Q15428	20	6	6	Acetylation (Protein N-term)	3896400	6045000	17979000	24540000	58100000	443000	49256	Splicing factor 3A subunit 2 OS=Homo sapiens OX=9606 GN=SF3A2 PE=1 SV=2
P62879	18	6	3	Carbamidomethylation; Acetylation (Protein N-term)	0	0	5170100	7728200	27700000	12800000	37331	Guanine nucleotide-binding protein G(I)/G(S)/G(T) subunit beta-2 OS=Homo sapiens OX=9606 GN=GNB2 PE=1 SV=3
Q6DKI1	28	6	6		3521400	3320400	4198100	12173000	69100000	1780000	29669	60S ribosomal protein L7-like 1 OS=Homo sapiens OX=9606 GN=RPL7L1 PE=1 SV=2
P62314	29	2	2		58639	252480	9333200	9137100	85900000	907000	13282	Small nuclear ribonucleoprotein Sm D1 OS=Homo sapiens OX=9606 GN=SNRPD1 PE=1 SV=1
Q14011	38	5	5		0	8790000	4733200	5816800	38000000	1550000	18648	Cold-inducible RNA-binding protein OS=Homo sapiens OX=9606 GN=CIRBP PE=1 SV=1
P47914	21	4	4		27877000	72177000	80752000	154830000	400000000	19800000	17752	60S ribosomal protein L29 OS=Homo sapiens OX=9606 GN=RPL29 PE=1 SV=2
P68402	26	4	4	Acetylation (Protein N-term)	2165600	0	10177000	21773000	104000000	2630000	25569	Platelet-activating factor acetylhydrolase IB subunit alpha2 OS=Homo sapiens OX=9606 GN=PAFAH1B2 PE=1 SV=1
P50914	27	11	10	Carbamidomethylation	8381700	44579000	74183000	116410000	256000000	12100000	23432	60S ribosomal protein L14 OS=Homo sapiens OX=9606 GN=RPL14 PE=1 SV=4
Q6IBS0	10	2	2		0	0	6634600	13766000	55200000	13600000	39548	Twinfilin-2 OS=Homo sapiens OX=9606 GN=TWF2 PE=1 SV=2
P13073	51	9	9		11797000	2753100	29840000	38086000	185000000	16200000	19577	Cytochrome c oxidase subunit 4 isoform 1 mitochondrial OS=Homo sapiens OX=9606 GN=COX4I1 PE=1 SV=1
Q9P0J0	37	5	5		2191400	12762000	13416000	24955000	14600000	556000	16698	NADH dehydrogenase [ubiquinone] 1 alpha subcomplex subunit 13 OS=Homo sapiens OX=9606 GN=NDUFA13 PE=1 SV=3
Q9NZ45	26	2	2		437580	2293900	30040000	41811000	50200000	3210000	12199	CDGSH iron-sulfur domain-containing protein 1 OS=Homo sapiens OX=9606 GN=CISD1 PE=1 SV=1
O75976	7	5	5		0	133900	8805100	3579800	1750000	1940000	152931	Carboxypeptidase D OS=Homo sapiens OX=9606 GN=CPD PE=1 SV=2
Q9GZT3	57	7	7		2214000	6251700	32391000	53485000	261000000	20400000	12349	SRA stem-loop-interacting RNA-binding protein mitochondrial OS=Homo sapiens OX=9606 GN=SLIRP PE=1 SV=1
Q5RKV6	22	4	4		5261500	1716700	5410500	11505000	8660000	3500000	28235	Exosome complex component MTR3 OS=Homo sapiens OX=9606 GN=EXOSC6 PE=1 SV=1
P07305	23	6	6	Acetylation (Protein N-term)	4462600	8647000	12014000	24776000	99700000	5870000	20863	Histone H1.0 OS=Homo sapiens OX=9606 GN=H1-0 PE=1 SV=3
O95197	5	3	3	Carbamidomethylation; Acetylation (Protein N-term)	13088000	11493000	39024000	54139000	39300000	32900	112611	Reticulon-3 OS=Homo sapiens OX=9606 GN=RTN3 PE=1 SV=2
Q9Y3U8	21	4	4		5060600	7007400	10198000	19791000	251000000	9920000	12254	60S ribosomal protein L36 OS=Homo sapiens OX=9606 GN=RPL36 PE=1 SV=3
Q8TCT9	15	4	4		1360600	3376300	1966000	2922300	54300000	1780000	41488	Minor histocompatibility antigen H13 OS=Homo sapiens OX=9606 GN=HM13 PE=1 SV=1
Q13596	15	6	5		190760	442470	4581600	6966500	13000000	1730000	59070	Sorting nexin-1 OS=Homo sapiens OX=9606 GN=SNX1 PE=1 SV=3
P24539	30	6	6		2118200	4452000	12769000	21498000	106000000	5110000	28909	ATP synthase F(0) complex subunit B1 mitochondrial OS=Homo sapiens OX=9606 GN=ATP5PB PE=1 SV=2
O75531	43	3	3		0	174760	17740000	20516000	153000000	5560000	10059	Barrier-to-autointegration factor OS=Homo sapiens OX=9606 GN=BANF1 PE=1 SV=1
O14562	20	3	3		3088400	31840000	98980000	7994400	26500000	4030000	33382	Ubiquitin domain-containing protein UBFD1 OS=Homo sapiens OX=9606 GN=UBFD1 PE=1 SV=2
Q07866	16	7	4		820030	17091000	2742300	5284900	9560000	1290000	65310	Kinesin light chain 1 OS=Homo sapiens OX=9606 GN=KLC1 PE=1 SV=2
Q96N66	13	5	5		18366000	1219700	6411800	12122000	26900000	1100000	52765	Lysophospholipid acyltransferase 7 OS=Homo sapiens OX=9606 GN=MBOAT7 PE=1 SV=2
P61960	59	3	3		0	0	2727200	5959100	63100000	0	9118	Ubiquitin-fold modifier 1 OS=Homo sapiens OX=9606 GN=UFM1 PE=1 SV=1
P53384	15	5	5	Carbamidomethylation; Acetylation (Protein N-term)	6037400	1092400	7963700	9179500	0	11200000	34535	Cytosolic Fe-S cluster assembly factor NUBP1 OS=Homo sapiens OX=9606 GN=NUBP1 PE=1 SV=2
O43504	48	3	3	Acetylation (Protein N-term)	136190	777880	1699200	4121100	30500000	273000	9614	Ragulator complex protein LAMTOR5 OS=Homo sapiens OX=9606 GN=LAMTOR5 PE=1 SV=1
O15126	22	3	3	Acetylation (Protein N-term)	421070	0	9186900	9638600	24900000	288000	37920	Secretory carrier-associated membrane protein 1 OS=Homo sapiens OX=9606 GN=SCAMP1 PE=1 SV=2
Q9NRX4	47	3	3	Acetylation (Protein N-term)	0	0	11430000	8560200	14000000	34800000	13833	14 kDa phosphohistidine phosphatase OS=Homo sapiens OX=9606 GN=PHPT1 PE=1 SV=1
O43324	40	6	6	Acetylation (Protein N-term)	83908	1913000	23935000	19303000	21000000	1070000	19811	Eukaryotic translation elongation factor 1 epsilon-1 OS=Homo sapiens OX=9606 GN=EEF1E1 PE=1 SV=1
P63162	12	3	3		0	1069000	9864700	19955000	0	0	24614	Small nuclear ribonucleoprotein-associated protein N OS=Homo sapiens OX=9606 GN=SNRPN PE=1 SV=1
P14678	12	3	3		0	1069000	9864700	19955000	80200000	14200000	24610	Small nuclear ribonucleoprotein-associated proteins B and B' OS=Homo sapiens OX=9606 GN=SNRPB PE=1 SV=2
P84090	54	6	6	Carbamidomethylation; Acetylation (Protein N-term)	137540	2083600	33871000	90017000	242000000	13100000	12259	Enhancer of rudimentary homolog OS=Homo sapiens OX=9606 GN=ERH PE=1 SV=1
Q15185	32	5	5	Carbamidomethylation	0	8444700	47374000	108200000	299000000	4420000	18697	Prostaglandin E synthase 3 OS=Homo sapiens OX=9606 GN=PTGES3 PE=1 SV=1
Q96IU4	23	3	3		535990	860570	10827000	23188000	17800000	23800000	22346	Protein ABHD14B OS=Homo sapiens OX=9606 GN=ABHD14B PE=1 SV=1
P84095	40	5	4	Carbamidomethylation	99207	988780	2458700	3656100	13700000	1260000	21308	Rho-related GTP-binding protein RhoG OS=Homo sapiens OX=9606 GN=RHOG PE=1 SV=1
P40429	31	11	11	Acetylation (Protein N-term)	6087900	41201000	54488000	82068000	562000000	49900000	23577	60S ribosomal protein L13a OS=Homo sapiens OX=9606 GN=RPL13A PE=1 SV=2
Q92888	7	4	4		7127100	5781200	1045900	3428800	3990000	2400000	102435	Rho guanine nucleotide exchange factor 1 OS=Homo sapiens OX=9606 GN=ARHGEF1 PE=1 SV=2
Q9UHQ9	21	6	6		0	2248900	57438000	66541000	22000000	1490000	34095	NADH-cytochrome b5 reductase 1 OS=Homo sapiens OX=9606 GN=CYB5R1 PE=1 SV=1
Q06323	28	5	5	Carbamidomethylation	1367800	597790	27675000	37781000	73000000	7910000	28723	Proteasome activator complex subunit 1 OS=Homo sapiens OX=9606 GN=PSME1 PE=1 SV=1
Q5VZK9	6	4	4		0	1492100	3085200	3779100	723000	0	151556	F-actin-uncapping protein LRRC16A OS=Homo sapiens OX=9606 GN=CARMIL1 PE=1 SV=1
Q12996	18	6	6	Acetylation (Protein N-term)	0	488950	8509700	11428000	12600000	3390000	82922	Cleavage stimulation factor subunit 3 OS=Homo sapiens OX=9606 GN=CSTF3 PE=1 SV=1
A5YKK6	4	5	5		12858000	0	10349000	20242000	10000000	59100000	266937	CCR4-NOT transcription complex subunit 1 OS=Homo sapiens OX=9606 GN=CNOT1 PE=1 SV=2
Q9BYD2	25	5	5		321990	1932500	14616000	10911000	60900000	4660000	30243	39S ribosomal protein L9 mitochondrial OS=Homo sapiens OX=9606 GN=MRPL9 PE=1 SV=2
Q14008	7	10	10	Carbamidomethylation	538310	6901300	1918200	51140000	41800000	8030000	225493	Cytoskeleton-associated protein 5 OS=Homo sapiens OX=9606 GN=CKAP5 PE=1 SV=3
Q9NRF9	33	4	4	Acetylation (Protein N-term)	4014200	6401800	17941000	21256000	20300000	1250000	16860	DNA polymerase epsilon subunit 3 OS=Homo sapiens OX=9606 GN=POLE3 PE=1 SV=1
Q8WVM7	8	6	6		0	0	7310900	2514100	6240000	726000	144427	Cohesin subunit SA-1 OS=Homo sapiens OX=9606 GN=STAG1 PE=1 SV=3
P09234	41	5	5	Carbamidomethylation	0	12831000	10609000	15189000	51500000	5340000	17394	U1 small nuclear ribonucleoprotein C OS=Homo sapiens OX=9606 GN=SNRPC PE=1 SV=1
Q4G0N4	17	5	5		99960	0	3410100	4189600	27900000	55200	49433	NAD kinase 2 mitochondrial OS=Homo sapiens OX=9606 GN=NADK2 PE=1 SV=2
O60256	17	4	3		0	0	2668100	3979000	8840000	0	40926	Phosphoribosyl pyrophosphate synthase-associated protein 2 OS=Homo sapiens OX=9606 GN=PRPSAP2 PE=1 SV=1
P48506	16	6	6	Carbamidomethylation	0	0	5069800	6487200	4960000	784000	72766	Glutamate--cysteine ligase catalytic subunit OS=Homo sapiens OX=9606 GN=GCLC PE=1 SV=2
P15328	14	5	5	Carbamidomethylation	2462600	2772500	20212000	11772000	0	443000	29819	Folate receptor alpha OS=Homo sapiens OX=9606 GN=FOLR1 PE=1 SV=3
P15374	22	4	4		98350	0	6880500	10734000	38400000	570000	26183	Ubiquitin carboxyl-terminal hydrolase isozyme L3 OS=Homo sapiens OX=9606 GN=UCHL3 PE=1 SV=1
Q9BYD1	35	5	5		0	5141000	17371000	23070000	241000000	4430000	20692	39S ribosomal protein L13 mitochondrial OS=Homo sapiens OX=9606 GN=MRPL13 PE=1 SV=1
P49406	36	8	8		164530	1756400	6651600	2993800	17800000	543000	33535	39S ribosomal protein L19 mitochondrial OS=Homo sapiens OX=9606 GN=MRPL19 PE=1 SV=2
Q9UBQ7	17	3	3		0	0	3530400	3426800	48600000	1180000	35668	Glyoxylate reductase/hydroxypyruvate reductase OS=Homo sapiens OX=9606 GN=GRHPR PE=1 SV=1
P36405	35	4	4	Carbamidomethylation	0	821380	10043000	12572000	49500000	961000	20456	ADP-ribosylation factor-like protein 3 OS=Homo sapiens OX=9606 GN=ARL3 PE=1 SV=2
Q9UM00	15	3	3		43521	0	5928000	10043000	35300000	2210000	27079	Calcium load-activated calcium channel OS=Homo sapiens OX=9606 GN=TMCO1 PE=1 SV=2
P08047	9	3	3	Carbamidomethylation; Acetylation (Protein N-term)	1526800	836780	10970000	13708000	9220000	247000	80693	Transcription factor Sp1 OS=Homo sapiens OX=9606 GN=SP1 PE=1 SV=3
P10599	44	8	8		3529000	14792000	47363000	91990000	880000000	49800000	11737	Thioredoxin OS=Homo sapiens OX=9606 GN=TXN PE=1 SV=3
O95400	23	6	6		5983200	2375900	75068000	9017000	29900000	4390000	37646	CD2 antigen cytoplasmic tail-binding protein 2 OS=Homo sapiens OX=9606 GN=CD2BP2 PE=1 SV=1
Q96JM3	9	4	4		0	0	3347300	10352000	64600000	0	89099	Chromosome alignment-maintaining phosphoprotein 1 OS=Homo sapiens OX=9606 GN=CHAMP1 PE=1 SV=2
P61769	19	3	3		32406000	8927700	1827800	11077000	38000000	3560000	13715	Beta-2-microglobulin OS=Homo sapiens OX=9606 GN=B2M PE=1 SV=1
O14776	8	7	6	Acetylation (Protein N-term)	773420	3130600	10553000	17692000	18000000	4510000	123901	Transcription elongation regulator 1 OS=Homo sapiens OX=9606 GN=TCERG1 PE=1 SV=2
P61956	63	4	4		0	5216300	46907000	104640000	42600000	3960000	10871	Small ubiquitin-related modifier 2 OS=Homo sapiens OX=9606 GN=SUMO2 PE=1 SV=3
Q08379	4	3	3		0	885770	1490500	2097500	39500000	6020000	113086	Golgin subfamily A member 2 OS=Homo sapiens OX=9606 GN=GOLGA2 PE=1 SV=3
P62310	42	4	4	Acetylation (Protein N-term)	1786600	3398900	10497000	18709000	32700000	196000	11845	U6 snRNA-associated Sm-like protein LSm3 OS=Homo sapiens OX=9606 GN=LSM3 PE=1 SV=2
Q9HCC0	13	4	4		356020	23262	856490	972410	0	0	61333	Methylcrotonoyl-CoA carboxylase beta chain mitochondrial OS=Homo sapiens OX=9606 GN=MCCC2 PE=1 SV=1
P61923	27	4	4	Acetylation (Protein N-term)	0	1874400	21300000	32688000	73600000	5220000	20198	Coatomer subunit zeta-1 OS=Homo sapiens OX=9606 GN=COPZ1 PE=1 SV=1
P14209	57	6	6		0	0	46971000	38780000	44000000	3040000	18848	CD99 antigen OS=Homo sapiens OX=9606 GN=CD99 PE=1 SV=1
Q9P013	21	4	4	Acetylation (Protein N-term)	0	0	6652300	4910400	18300000	601000	26624	Spliceosome-associated protein CWC15 homolog OS=Homo sapiens OX=9606 GN=CWC15 PE=1 SV=2
P81605	44	4	4	Carbamidomethylation	11447000	18247000	10245000	8827600	10500000	724000	11284	Dermcidin OS=Homo sapiens OX=9606 GN=DCD PE=1 SV=2
Q9NR09	2	4	4		0	0	1255900	2393200	435000	346000	530260	Baculoviral IAP repeat-containing protein 6 OS=Homo sapiens OX=9606 GN=BIRC6 PE=1 SV=2
P62854	26	3	3		21417000	23129000	100050000	113390000	499000000	26500000	13015	40S ribosomal protein S26 OS=Homo sapiens OX=9606 GN=RPS26 PE=1 SV=3
P55769	47	7	7	Carbamidomethylation	0	3319400	19767000	32139000	126000000	1490000	14174	NHP2-like protein 1 OS=Homo sapiens OX=9606 GN=SNU13 PE=1 SV=3
Q8IZ73	9	3	3		0	0	759400	2127800	4170000	291000	61312	RNA pseudouridylate synthase domain-containing protein 2 OS=Homo sapiens OX=9606 GN=RPUSD2 PE=1 SV=2
P35030	11	9	3	Carbamidomethylation	10179000	37521000	479330000	637830000	28000000000	1490000000	32529	Trypsin-3 OS=Homo sapiens OX=9606 GN=PRSS3 PE=1 SV=2
Q70UQ0	23	6	6		0	0	1657400	5146200	18800000	1390000	39309	Inhibitor of nuclear factor kappa-B kinase-interacting protein OS=Homo sapiens OX=9606 GN=IKBIP PE=1 SV=1
Q9Y333	40	2	2		13484000	43263	8223100	15372000	14400000	551000	10835	U6 snRNA-associated Sm-like protein LSm2 OS=Homo sapiens OX=9606 GN=LSM2 PE=1 SV=1
Q02750	11	2	1		0	0	7254800	10590000	54700000	1170000	43439	Dual specificity mitogen-activated protein kinase kinase 1 OS=Homo sapiens OX=9606 GN=MAP2K1 PE=1 SV=2
Q96AY3	8	3	3	Carbamidomethylation	269190	0	11169000	30251000	25000000	7710000	64245	Peptidyl-prolyl cis-trans isomerase FKBP10 OS=Homo sapiens OX=9606 GN=FKBP10 PE=1 SV=1
Q10589	13	2	2		0	2452200	9449400	19307000	52100000	1600000	19769	Bone marrow stromal antigen 2 OS=Homo sapiens OX=9606 GN=BST2 PE=1 SV=1
Q8NFH3	8	2	2		0	0	2473600	7004100	32300000	0	42151	Nucleoporin Nup43 OS=Homo sapiens OX=9606 GN=NUP43 PE=1 SV=1
P06730	34	5	5	Acetylation (Protein N-term)	0	0	21812000	32276000	8510000	279000	25097	Eukaryotic translation initiation factor 4E OS=Homo sapiens OX=9606 GN=EIF4E PE=1 SV=2
O75607	17	2	2	Acetylation (Protein N-term)	1386700	2122600	10298000	18361000	42000000	1570000	19344	Nucleoplasmin-3 OS=Homo sapiens OX=9606 GN=NPM3 PE=1 SV=3
O60930	19	4	4		20767000	14522000	17007000	23648000	15700000	226000	32064	Ribonuclease H1 OS=Homo sapiens OX=9606 GN=RNASEH1 PE=1 SV=2
Q6RW13	25	2	2		554930	529340	5977700	8060300	22300000	39900000	17419	Type-1 angiotensin II receptor-associated protein OS=Homo sapiens OX=9606 GN=AGTRAP PE=1 SV=1
P56556	34	3	3		0	0	9665200	14630000	134000000	11400000	15137	NADH dehydrogenase [ubiquinone] 1 alpha subcomplex subunit 6 OS=Homo sapiens OX=9606 GN=NDUFA6 PE=1 SV=4
Q9NXG2	16	3	3	Acetylation (Protein N-term)	2641600	7435000	18409000	19058000	11600000	557000	39315	THUMP domain-containing protein 1 OS=Homo sapiens OX=9606 GN=THUMPD1 PE=1 SV=2
P56211	60	4	3	Acetylation (Protein N-term)	545760	382270	23032000	30448000	7000000	390000	12323	cAMP-regulated phosphoprotein 19 OS=Homo sapiens OX=9606 GN=ARPP19 PE=1 SV=2
Q969H8	16	2	2		0	3524100	12686000	19804000	21400000	826000	18795	Myeloid-derived growth factor OS=Homo sapiens OX=9606 GN=MYDGF PE=1 SV=1
O60493	17	4	4		467590	2583700	6327100	14773000	9690000	946000	18762	Sorting nexin-3 OS=Homo sapiens OX=9606 GN=SNX3 PE=1 SV=3
Q86W42	18	3	3	Carbamidomethylation	0	0	1877100	3332000	0	0	37535	THO complex subunit 6 homolog OS=Homo sapiens OX=9606 GN=THOC6 PE=1 SV=1
Q9Y3A4	24	4	4	Carbamidomethylation	0	3231400	6881200	11879000	272000000	20100000	32334	Ribosomal RNA-processing protein 7 homolog A OS=Homo sapiens OX=9606 GN=RRP7A PE=1 SV=2
P29372	10	3	3		0	0	682380	1867700	22200000	418000	32869	DNA-3-methyladenine glycosylase OS=Homo sapiens OX=9606 GN=MPG PE=1 SV=3
P61024	47	2	2		0	0	13016000	16105000	22000000	0	9660	Cyclin-dependent kinases regulatory subunit 1 OS=Homo sapiens OX=9606 GN=CKS1B PE=1 SV=1
Q9BXV9	65	3	3	Carbamidomethylation; Acetylation (Protein N-term)	0	0	3328100	4756300	1580000	0	10859	EKC/KEOPS complex subunit GON7 OS=Homo sapiens OX=9606 GN=GON7 PE=1 SV=2
P51970	39	4	4		34703	0	1741900	2439900	6950000	255000	20105	NADH dehydrogenase [ubiquinone] 1 alpha subcomplex subunit 8 OS=Homo sapiens OX=9606 GN=NDUFA8 PE=1 SV=3
Q9NP79	11	2	2	Acetylation (Protein N-term)	334780	0	4810100	11420000	23000000	267000000	33879	Vacuolar protein sorting-associated protein VTA1 homolog OS=Homo sapiens OX=9606 GN=VTA1 PE=1 SV=1
P50238	36	3	3	Carbamidomethylation	0	0	3805300	24367000	508000	571000	8533	Cysteine-rich protein 1 OS=Homo sapiens OX=9606 GN=CRIP1 PE=1 SV=3
Q92541	13	7	7		0	1345700	7894100	10438000	8390000	1130000	80314	RNA polymerase-associated protein RTF1 homolog OS=Homo sapiens OX=9606 GN=RTF1 PE=1 SV=4
P62942	30	3	3		4891200	24462000	82339000	121820000	112000000	4640000	11951	Peptidyl-prolyl cis-trans isomerase FKBP1A OS=Homo sapiens OX=9606 GN=FKBP1A PE=1 SV=2
P62861	20	5	5		880590	2457600	17279000	33534000	221000000	11400000	6648	40S ribosomal protein S30 OS=Homo sapiens OX=9606 GN=FAU PE=1 SV=1
P43307	14	2	2		0	0	3074000	0	49500000	921000	32235	Translocon-associated protein subunit alpha OS=Homo sapiens OX=9606 GN=SSR1 PE=1 SV=3
Q9Y2U8	6	3	3	Acetylation (Protein N-term)	248190	672440	2292000	2205600	5710000	384000	99997	Inner nuclear membrane protein Man1 OS=Homo sapiens OX=9606 GN=LEMD3 PE=1 SV=2
O95297	16	4	4		7474800	24657000	18714000	12766000	114000000	6930000	29082	Myelin protein zero-like protein 1 OS=Homo sapiens OX=9606 GN=MPZL1 PE=1 SV=1
Q96GC5	17	3	3		0	2491200	14834000	21472000	65400000	623000	23935	39S ribosomal protein L48 mitochondrial OS=Homo sapiens OX=9606 GN=MRPL48 PE=1 SV=2
P50897	14	3	3		0	1339300	9089800	11951000	37700000	0	34193	Palmitoyl-protein thioesterase 1 OS=Homo sapiens OX=9606 GN=PPT1 PE=1 SV=1
O43709	17	3	3		0	0	2340300	5895700	7160000	1170000	31880	Probable 18S rRNA (guanine-N(7))-methyltransferase OS=Homo sapiens OX=9606 GN=BUD23 PE=1 SV=2
Q9Y617	12	4	4		0	280440	3691700	5547400	73300000	2610000	40423	Phosphoserine aminotransferase OS=Homo sapiens OX=9606 GN=PSAT1 PE=1 SV=2
P60468	38	3	3		2488000	5958000	8264500	16762000	76700000	4930000	9974	Protein transport protein Sec61 subunit beta OS=Homo sapiens OX=9606 GN=SEC61B PE=1 SV=2
Q96CT7	29	5	5		713880	25849000	65651000	16011000	34300000	2190000	25835	Coiled-coil domain-containing protein 124 OS=Homo sapiens OX=9606 GN=CCDC124 PE=1 SV=1
Q9UNK0	14	2	2		0	0	2493200	8094600	87400000	0	26907	Syntaxin-8 OS=Homo sapiens OX=9606 GN=STX8 PE=1 SV=2
Q9UNN5	5	3	3		0	1859400	4930600	14612000	16300000	1080000	73954	FAS-associated factor 1 OS=Homo sapiens OX=9606 GN=FAF1 PE=1 SV=2
P13987	27	5	5	Carbamidomethylation	241240	450610	6155200	12158000	69800000	94700	14177	CD59 glycoprotein OS=Homo sapiens OX=9606 GN=CD59 PE=1 SV=1
Q9BQ75	16	4	4		0	2329800	5281400	11762000	39400000	2270000	31884	Protein CMSS1 OS=Homo sapiens OX=9606 GN=CMSS1 PE=1 SV=2
P15151	7	2	2		83894000	37862000	2174600	3664900	1330000	0	45303	Poliovirus receptor OS=Homo sapiens OX=9606 GN=PVR PE=1 SV=2
Q96P16	14	3	3		0	0	1402000	3200600	5470000	157000	35720	Regulation of nuclear pre-mRNA domain-containing protein 1A OS=Homo sapiens OX=9606 GN=RPRD1A PE=1 SV=1
Q15070	11	3	3		663790	4925400	13583000	19272000	53800000	1310000	48548	Mitochondrial inner membrane protein OXA1L OS=Homo sapiens OX=9606 GN=OXA1L PE=1 SV=3
O14561	21	5	5		14785000	72463000	16713000	18094000	103000000	2720000	17417	Acyl carrier protein mitochondrial OS=Homo sapiens OX=9606 GN=NDUFAB1 PE=1 SV=3
P09669	40	3	3		260470	253450	676820	2678200	17400000	552000	8781	Cytochrome c oxidase subunit 6C OS=Homo sapiens OX=9606 GN=COX6C PE=1 SV=2
Q9UHX3	5	3	2		1008800	2474900	4126200	5017800	16900000	2930000	90472	Adhesion G protein-coupled receptor E2 OS=Homo sapiens OX=9606 GN=ADGRE2 PE=1 SV=2
Q13572	14	3	3	Carbamidomethylation	881790	1723600	1770000	2344700	4380000	403000	45621	Inositol-tetrakisphosphate 1-kinase OS=Homo sapiens OX=9606 GN=ITPK1 PE=1 SV=2
Q96HR9	16	3	3		0	2081800	17525000	32356000	14900000	655000	23418	Receptor expression-enhancing protein 6 OS=Homo sapiens OX=9606 GN=REEP6 PE=1 SV=2
P06703	37	3	3		849410	8357400	14370000	25026000	13500000	4460000	10180	Protein S100-A6 OS=Homo sapiens OX=9606 GN=S100A6 PE=1 SV=1
O00461	9	4	4		199780	1860800	6538300	13164000	1500000	264000	81880	Golgi integral membrane protein 4 OS=Homo sapiens OX=9606 GN=GOLIM4 PE=1 SV=1
Q9Y508	15	2	2	Carbamidomethylation	1346100	35139	1744800	2982600	0	47900	25694	E3 ubiquitin-protein ligase RNF114 OS=Homo sapiens OX=9606 GN=RNF114 PE=1 SV=1
P18077	26	4	4		4352300	34040000	57183000	91470000	272000000	1410000	12538	60S ribosomal protein L35a OS=Homo sapiens OX=9606 GN=RPL35A PE=1 SV=2
O95139	45	5	5	Acetylation (Protein N-term)	0	0	6434200	15633000	5250000	0	15489	NADH dehydrogenase [ubiquinone] 1 beta subcomplex subunit 6 OS=Homo sapiens OX=9606 GN=NDUFB6 PE=1 SV=3
P61803	28	3	3	Acetylation (Protein N-term)	0	0	22169000	51290000	109000000	1540000	12497	Dolichyl-diphosphooligosaccharide--protein glycosyltransferase subunit DAD1 OS=Homo sapiens OX=9606 GN=DAD1 PE=1 SV=3
P80217	13	2	2	Carbamidomethylation; Acetylation (Protein N-term)	135600	0	5576500	4993100	0	424000	31546	Interferon-induced 35 kDa protein OS=Homo sapiens OX=9606 GN=IFI35 PE=1 SV=5
O95456	10	3	3	Carbamidomethylation; Acetylation (Protein N-term)	174470	372970	3651500	6433200	20000000	512000	32854	Proteasome assembly chaperone 1 OS=Homo sapiens OX=9606 GN=PSMG1 PE=1 SV=1
P02765	4	2	2	Carbamidomethylation	7382700	6244500	6008200	11091000	21000000	1970000	39341	Alpha-2-HS-glycoprotein OS=Homo sapiens OX=9606 GN=AHSG PE=1 SV=2
P63218	32	3	3	Acetylation (Protein N-term)	673450	28654000	22412000	31227000	16800000	846000	7318	Guanine nucleotide-binding protein G(I)/G(S)/G(O) subunit gamma-5 OS=Homo sapiens OX=9606 GN=GNG5 PE=1 SV=3
Q14331	10	3	3		0	1463900	10522000	23432000	26700000	0	29172	Protein FRG1 OS=Homo sapiens OX=9606 GN=FRG1 PE=1 SV=1
O95302	9	4	4		0	1051000	20743000	28060000	17400000	146000	63084	Peptidyl-prolyl cis-trans isomerase FKBP9 OS=Homo sapiens OX=9606 GN=FKBP9 PE=1 SV=2
P62306	40	2	2	Oxidation (M); Acetylation (Protein N-term)	0	0	4590100	6299300	20300000	1050000	9725	Small nuclear ribonucleoprotein F OS=Homo sapiens OX=9606 GN=SNRPF PE=1 SV=1
Q9Y2R5	36	3	3	Carbamidomethylation	579880	1549000	4511500	6313900	39100000	2810000	14502	28S ribosomal protein S17 mitochondrial OS=Homo sapiens OX=9606 GN=MRPS17 PE=1 SV=1
Q7Z5G4	19	2	2		320420	1096000	4864200	8747700	818000	0	15824	Golgin subfamily A member 7 OS=Homo sapiens OX=9606 GN=GOLGA7 PE=1 SV=2
Q96B36	12	2	2	Acetylation (Protein N-term)	0	0	1368800	1239500	11600000	679000	27383	Proline-rich AKT1 substrate 1 OS=Homo sapiens OX=9606 GN=AKT1S1 PE=1 SV=1
Q9Y4Y9	26	2	2	Carbamidomethylation; Acetylation (Protein N-term)	1049000	423880	6597000	7680300	4830000	29300	9937	U6 snRNA-associated Sm-like protein LSm5 OS=Homo sapiens OX=9606 GN=LSM5 PE=1 SV=3
Q9Y2S6	31	2	2		0	0	10838000	9868700	22300000	1010000	7066	Translation machinery-associated protein 7 OS=Homo sapiens OX=9606 GN=TMA7 PE=1 SV=1
Q9H0U3	6	2	2		0	5297200	5419500	4803500	11300000	713000	38037	Magnesium transporter protein 1 OS=Homo sapiens OX=9606 GN=MAGT1 PE=1 SV=1
P62273	34	2	2		600750	5673400	20477000	35891000	13100000	841000	6677	40S ribosomal protein S29 OS=Homo sapiens OX=9606 GN=RPS29 PE=1 SV=2
Q9Y5J1	50	17	17	Carbamidomethylation	4387800	3739100	15929000	63154000	247000000	7570000	62004	U3 small nucleolar RNA-associated protein 18 homolog OS=Homo sapiens OX=9606 GN=UTP18 PE=1 SV=3
Q15599	35	7	7	Carbamidomethylation	0	2506200	7057100	16945000	20100000	1230000	37414	Na(+)/H(+) exchange regulatory cofactor NHE-RF2 OS=Homo sapiens OX=9606 GN=SLC9A3R2 PE=1 SV=2
Q9BSC4	16	9	9		0	831290	4777400	13926000	84400000	29500000	80302	Nucleolar protein 10 OS=Homo sapiens OX=9606 GN=NOL10 PE=1 SV=1
Q8IXM3	53	4	4		0	0	6458400	4337500	2290000	0	15383	39S ribosomal protein L41 mitochondrial OS=Homo sapiens OX=9606 GN=MRPL41 PE=1 SV=1
Q9UHD1	23	5	5	Carbamidomethylation	698730	112080	22179000	42313000	249000000	6720000	37490	Cysteine and histidine-rich domain-containing protein 1 OS=Homo sapiens OX=9606 GN=CHORDC1 PE=1 SV=2
O15121	16	3	3		308110	0	1027500	2806800	12300000	1970000	37866	Sphingolipid delta(4)-desaturase DES1 OS=Homo sapiens OX=9606 GN=DEGS1 PE=1 SV=1
Q9GZY8	40	6	6		246900	0	7795400	6062500	47300000	688000	38465	Mitochondrial fission factor OS=Homo sapiens OX=9606 GN=MFF PE=1 SV=1
Q9BU89	19	3	3	Oxidation (M); Acetylation (Protein N-term)	83032	76261	948190	540350	7110000	7490000	32904	Deoxyhypusine hydroxylase OS=Homo sapiens OX=9606 GN=DOHH PE=1 SV=1
Q9NR33	56	3	3	Acetylation (Protein N-term)	737550	0	1181600	4144900	11000000	1440000	12209	DNA polymerase epsilon subunit 4 OS=Homo sapiens OX=9606 GN=POLE4 PE=1 SV=2
Q86UP2	43	51	51		32800000	40960000	127140000	171630000	421000000	14900000	156275	Kinectin OS=Homo sapiens OX=9606 GN=KTN1 PE=1 SV=1
O15027	27	30	30	Carbamidomethylation; Oxidation (M); Acetylation (Protein N-term)	4876800	8454900	65994000	100710000	48000000	5750000	251891	Protein transport protein Sec16A OS=Homo sapiens OX=9606 GN=SEC16A PE=1 SV=4
P53621	33	26	26	Carbamidomethylation	1573200	8742300	35371000	88751000	633000000	23500000	138345	Coatomer subunit alpha OS=Homo sapiens OX=9606 GN=COPA PE=1 SV=2
O60832	41	17	17	Acetylation (Protein N-term)	20151000	11398000	47750000	74713000	218000000	28600000	57674	H/ACA ribonucleoprotein complex subunit DKC1 OS=Homo sapiens OX=9606 GN=DKC1 PE=1 SV=3
P17858	21	11	8	Carbamidomethylation	10353000	17323000	38181000	46645000	34800000	40400000	85018	ATP-dependent 6-phosphofructokinase liver type OS=Homo sapiens OX=9606 GN=PFKL PE=1 SV=6
O75367	43	17	11		593910	3124000	21056000	38588000	473000000	17800000	39617	Core histone macro-H2A.1 OS=Homo sapiens OX=9606 GN=MACROH2A1 PE=1 SV=4
Q9UMX0	37	13	8	Acetylation (Protein N-term)	2035400	3558900	11619000	10752000	109000000	15700000	62519	Ubiquilin-1 OS=Homo sapiens OX=9606 GN=UBQLN1 PE=1 SV=2
Q9UG63	41	22	22		266140	7113400	49016000	69654000	256000000	6490000	71290	ATP-binding cassette sub-family F member 2 OS=Homo sapiens OX=9606 GN=ABCF2 PE=1 SV=2
Q8IY67	38	11	11	Acetylation (Protein N-term)	928130	110800	13110000	12684000	47600000	775000	63877	Ribonucleoprotein PTB-binding 1 OS=Homo sapiens OX=9606 GN=RAVER1 PE=1 SV=1
P12081	23	9	5	Acetylation (Protein N-term)	384560	9171600	6780600	13814000	104000000	23800000	57411	Histidine--tRNA ligase cytoplasmic OS=Homo sapiens OX=9606 GN=HARS1 PE=1 SV=2
Q14C86	14	11	11	Carbamidomethylation; Oxidation (M)	1125800	2304500	14858000	25861000	18600000	5700000	164979	GTPase-activating protein and VPS9 domain-containing protein 1 OS=Homo sapiens OX=9606 GN=GAPVD1 PE=1 SV=2
P54136	37	18	18	Carbamidomethylation; Acetylation (Protein N-term)	2502500	3561100	28667000	78360000	260000000	17000000	75379	Arginine--tRNA ligase cytoplasmic OS=Homo sapiens OX=9606 GN=RARS1 PE=1 SV=2
Q9Y6E2	27	11	11		444520	2394300	12864000	26026000	133000000	22100000	48162	Basic leucine zipper and W2 domain-containing protein 2 OS=Homo sapiens OX=9606 GN=BZW2 PE=1 SV=1
Q9Y295	40	11	11	Carbamidomethylation	39991	2792900	14934000	34867000	192000000	4590000	40542	Developmentally-regulated GTP-binding protein 1 OS=Homo sapiens OX=9606 GN=DRG1 PE=1 SV=1
Q9UBS4	30	7	7		960100	4428700	20590000	23650000	75900000	1330000	40514	DnaJ homolog subfamily B member 11 OS=Homo sapiens OX=9606 GN=DNAJB11 PE=1 SV=1
P38117	53	15	15	Carbamidomethylation	15074000	16829000	48487000	54314000	52500000	2940000	27844	Electron transfer flavoprotein subunit beta OS=Homo sapiens OX=9606 GN=ETFB PE=1 SV=3
Q9H4I3	21	4	4	Acetylation (Protein N-term)	2503000	0	12743000	39368000	23000000	345000	42321	TraB domain-containing protein OS=Homo sapiens OX=9606 GN=TRABD PE=1 SV=1
O75477	28	6	4		0	0	1001300	3281200	5680000	852000	39171	Erlin-1 OS=Homo sapiens OX=9606 GN=ERLIN1 PE=1 SV=2
Q8WVC0	14	6	6		1304300	1970800	4891300	18776000	17000000	1650000	75404	RNA polymerase-associated protein LEO1 OS=Homo sapiens OX=9606 GN=LEO1 PE=1 SV=1
P42695	6	6	6	Carbamidomethylation	1284000	0	1486300	2219100	6670000	334000	168890	Condensin-2 complex subunit D3 OS=Homo sapiens OX=9606 GN=NCAPD3 PE=1 SV=2
Q68CQ4	12	6	6		80348	1280200	5396200	13700000	35700000	2700000	87055	U3 small nucleolar RNA-associated protein 25 homolog OS=Homo sapiens OX=9606 GN=UTP25 PE=1 SV=2
Q15843	23	2	2		735870	7139600	19817000	26043000	9630000	1990000	9072	NEDD8 OS=Homo sapiens OX=9606 GN=NEDD8 PE=1 SV=1
P42166	44	26	12	Carbamidomethylation	1647800	4009100	14747000	27077000	126000000	24800000	75492	Lamina-associated polypeptide 2 isoform alpha OS=Homo sapiens OX=9606 GN=TMPO PE=1 SV=2
O43290	39	22	22	Oxidation (M)	320390	2048900	20737000	32305000	159000000	12200000	90255	U4/U6.U5 tri-snRNP-associated protein 1 OS=Homo sapiens OX=9606 GN=SART1 PE=1 SV=1
Q00341	27	21	21	Acetylation (Protein N-term)	1163900	3387700	22240000	23289000	309000000	44100000	141455	Vigilin OS=Homo sapiens OX=9606 GN=HDLBP PE=1 SV=2
Q15397	30	16	16		624600	1731500	15851000	47881000	145000000	4240000	73584	Pumilio homolog 3 OS=Homo sapiens OX=9606 GN=PUM3 PE=1 SV=3
Q16718	47	5	5		0	574400	1386600	2363300	21200000	100000	13459	NADH dehydrogenase [ubiquinone] 1 alpha subcomplex subunit 5 OS=Homo sapiens OX=9606 GN=NDUFA5 PE=1 SV=3
Q9Y3Y2	30	6	6	Oxidation (M)	2276900	7739400	13644000	29800000	48600000	1670000	26397	Chromatin target of PRMT1 protein OS=Homo sapiens OX=9606 GN=CHTOP PE=1 SV=2
Q10471	33	15	15		3247600	13222000	35722000	37079000	107000000	16400000	64733	Polypeptide N-acetylgalactosaminyltransferase 2 OS=Homo sapiens OX=9606 GN=GALNT2 PE=1 SV=1
Q8N684	22	9	9		1042500	2958900	15479000	27939000	34300000	11100000	52050	Cleavage and polyadenylation specificity factor subunit 7 OS=Homo sapiens OX=9606 GN=CPSF7 PE=1 SV=1
O14602	38	7	7		2037300	2024900	23308000	31584000	0	0	16442	Eukaryotic translation initiation factor 1A Y-chromosomal OS=Homo sapiens OX=9606 GN=EIF1AY PE=1 SV=4
P47813	38	7	7		2037300	2024900	23308000	31584000	110000000	8860000	16460	Eukaryotic translation initiation factor 1A X-chromosomal OS=Homo sapiens OX=9606 GN=EIF1AX PE=1 SV=2
Q9Y570	22	4	4		0	306470	5995700	22832000	6150000	188000	42315	Protein phosphatase methylesterase 1 OS=Homo sapiens OX=9606 GN=PPME1 PE=1 SV=3
Q96HA7	3	3	3		181950	4246100	4781100	5822800	3270000	455000	150928	Tonsoku-like protein OS=Homo sapiens OX=9606 GN=TONSL PE=1 SV=2
P40925	27	6	6	Carbamidomethylation	372590	1983900	4488700	13222000	442000000	14600000	36426	Malate dehydrogenase cytoplasmic OS=Homo sapiens OX=9606 GN=MDH1 PE=1 SV=4
O15118	5	4	4		0	0	9210000	13532000	34600000	1850000	142166	NPC intracellular cholesterol transporter 1 OS=Homo sapiens OX=9606 GN=NPC1 PE=1 SV=2
O60341	28	12	12	Carbamidomethylation	1853400	17543000	14277000	33845000	36300000	11000000	92903	Lysine-specific histone demethylase 1A OS=Homo sapiens OX=9606 GN=KDM1A PE=1 SV=2
Q9UNF1	26	8	8		1000900	2049500	9203500	12904000	101000000	3230000	64954	Melanoma-associated antigen D2 OS=Homo sapiens OX=9606 GN=MAGED2 PE=1 SV=2
Q9UKN8	18	6	6		1203500	1516000	8365100	18077000	1380000	484000	91982	General transcription factor 3C polypeptide 4 OS=Homo sapiens OX=9606 GN=GTF3C4 PE=1 SV=2
Q9H0S4	48	15	15	Acetylation (Protein N-term)	0	73702	7955900	15032000	70900000	9740000	50647	Probable ATP-dependent RNA helicase DDX47 OS=Homo sapiens OX=9606 GN=DDX47 PE=1 SV=1
P09972	39	13	9	Carbamidomethylation	2859500	4418700	10855000	23588000	227000000	7550000	39456	Fructose-bisphosphate aldolase C OS=Homo sapiens OX=9606 GN=ALDOC PE=1 SV=2
Q9BUJ2	19	11	11		989170	4556800	27965000	28794000	201000000	4560000	95739	Heterogeneous nuclear ribonucleoprotein U-like protein 1 OS=Homo sapiens OX=9606 GN=HNRNPUL1 PE=1 SV=2
Q13561	46	14	14	Acetylation (Protein N-term)	4595600	3761000	24477000	40603000	58200000	3570000	44231	Dynactin subunit 2 OS=Homo sapiens OX=9606 GN=DCTN2 PE=1 SV=4
P14384	22	8	8		741840	226190	8635800	13435000	178000000	3560000	50514	Carboxypeptidase M OS=Homo sapiens OX=9606 GN=CPM PE=1 SV=2
Q5UIP0	9	12	12		146180	814610	9153300	9257300	23100000	971000	274464	Telomere-associated protein RIF1 OS=Homo sapiens OX=9606 GN=RIF1 PE=1 SV=2
Q9NVX2	23	7	7		324870	1981300	9414000	14947000	92100000	5490000	53320	Notchless protein homolog 1 OS=Homo sapiens OX=9606 GN=NLE1 PE=1 SV=4
O43768	83	13	12	Oxidation (M); Acetylation (Protein N-term)	4964300	1901500	14400000	21729000	82100000	5060000	13389	Alpha-endosulfine OS=Homo sapiens OX=9606 GN=ENSA PE=1 SV=1
Q9BRZ2	11	5	5		2847300	16472000	20347000	24252000	9180000	2460000	81488	E3 ubiquitin-protein ligase TRIM56 OS=Homo sapiens OX=9606 GN=TRIM56 PE=1 SV=3
Q9HCD5	36	7	7	Oxidation (M)	25519000	1038500	8823300	8509300	14000000	411000	65536	Nuclear receptor coactivator 5 OS=Homo sapiens OX=9606 GN=NCOA5 PE=1 SV=2
Q9NRZ9	12	7	7		37031	286920	3448600	9186500	4620000	450000	97074	Lymphoid-specific helicase OS=Homo sapiens OX=9606 GN=HELLS PE=1 SV=1
Q99417	46	4	4		0	3255400	8172700	19587000	120000000	13600000	11967	c-Myc-binding protein OS=Homo sapiens OX=9606 GN=MYCBP PE=1 SV=3
P63167	39	3	3	Carbamidomethylation	0	71086	7925400	10983000	148000000	2350000	10366	Dynein light chain 1 cytoplasmic OS=Homo sapiens OX=9606 GN=DYNLL1 PE=1 SV=1
Q01813	34	21	18	Carbamidomethylation	28448000	30805000	51088000	74352000	489000000	13800000	85596	ATP-dependent 6-phosphofructokinase platelet type OS=Homo sapiens OX=9606 GN=PFKP PE=1 SV=2
P48444	26	9	9		68618	890660	16632000	16987000	175000000	29300000	57210	Coatomer subunit delta OS=Homo sapiens OX=9606 GN=ARCN1 PE=1 SV=1
Q13242	58	15	14	Carbamidomethylation; Acetylation (Protein N-term)	9419100	1879100	16638000	34667000	88500000	25400000	25542	Serine/arginine-rich splicing factor 9 OS=Homo sapiens OX=9606 GN=SRSF9 PE=1 SV=1
Q9Y6H1	40	4	4	Carbamidomethylation; Oxidation (M)	2883100	12664000	14702000	20266000	57500000	4060000	15513	Coiled-coil-helix-coiled-coil-helix domain-containing protein 2 OS=Homo sapiens OX=9606 GN=CHCHD2 PE=1 SV=1
Q5T1J5	40	4	4	Carbamidomethylation; Oxidation (M)	2883100	12664000	14702000	20266000	57500000	4060000	15490	Putative coiled-coil-helix-coiled-coil-helix domain-containing protein CHCHD2P9 mitochondrial OS=Homo sapiens OX=9606 GN=CHCHD2P9 PE=5 SV=1
P07339	23	7	7		2214800	9284800	5538100	13534000	55500000	16700000	44552	Cathepsin D OS=Homo sapiens OX=9606 GN=CTSD PE=1 SV=1
Q969N2	18	6	6		379850	1614600	9466300	22952000	17600000	93500	65700	GPI transamidase component PIG-T OS=Homo sapiens OX=9606 GN=PIGT PE=1 SV=1
Q9BV40	47	6	6	Acetylation (Protein N-term)	5102700	4893500	2925200	9710700	2700000	3300000	11438	Vesicle-associated membrane protein 8 OS=Homo sapiens OX=9606 GN=VAMP8 PE=1 SV=1
P07948	25	9	8		64861000	2571100	10502000	18375000	41100000	3820000	58574	Tyrosine-protein kinase Lyn OS=Homo sapiens OX=9606 GN=LYN PE=1 SV=3
Q8N6R0	10	3	3		0	0	1362400	433180	2550000	318000	78768	eEF1A lysine and N-terminal methyltransferase OS=Homo sapiens OX=9606 GN=EEF1AKNMT PE=1 SV=1
Q00688	45	13	13		664980	1950600	7636900	27121000	51000000	4860000	25177	Peptidyl-prolyl cis-trans isomerase FKBP3 OS=Homo sapiens OX=9606 GN=FKBP3 PE=1 SV=1
P50750	29	7	7		496910	6365800	23909000	5793400	14500000	3530000	42778	Cyclin-dependent kinase 9 OS=Homo sapiens OX=9606 GN=CDK9 PE=1 SV=3
Q9Y3A5	36	8	8	Carbamidomethylation	1771400	1249400	13113000	31377000	104000000	6110000	28764	Ribosome maturation protein SBDS OS=Homo sapiens OX=9606 GN=SBDS PE=1 SV=4
P27694	46	19	19	Carbamidomethylation; Acetylation (Protein N-term)	4618600	12436000	39744000	65516000	179000000	14100000	68138	Replication protein A 70 kDa DNA-binding subunit OS=Homo sapiens OX=9606 GN=RPA1 PE=1 SV=2
Q96B97	19	6	6	Oxidation (M)	569580	1041500	4659700	11045000	0	30100000	73126	SH3 domain-containing kinase-binding protein 1 OS=Homo sapiens OX=9606 GN=SH3KBP1 PE=1 SV=2
Q9Y2Q3	51	8	8		4090500	1049600	14945000	7277300	27800000	15900000	25497	Glutathione S-transferase kappa 1 OS=Homo sapiens OX=9606 GN=GSTK1 PE=1 SV=3
P26006	14	11	11	Carbamidomethylation	1181800	937720	14979000	42905000	79700000	680000000	116612	Integrin alpha-3 OS=Homo sapiens OX=9606 GN=ITGA3 PE=1 SV=5
Q49A26	25	9	9		7063800	2952400	3375100	7024600	23000000	0	60547	Putative oxidoreductase GLYR1 OS=Homo sapiens OX=9606 GN=GLYR1 PE=1 SV=4
P17612	30	10	4		80440	1277600	19870000	23099000	41200000	9020000	40590	cAMP-dependent protein kinase catalytic subunit alpha OS=Homo sapiens OX=9606 GN=PRKACA PE=1 SV=2
O15155	25	2	2		0	0	1309400	5046400	30600000	192000	13289	BET1 homolog OS=Homo sapiens OX=9606 GN=BET1 PE=1 SV=1
Q12874	33	14	14		7083300	10994000	56814000	42936000	89800000	23300000	58849	Splicing factor 3A subunit 3 OS=Homo sapiens OX=9606 GN=SF3A3 PE=1 SV=1
Q9H773	45	6	6	Carbamidomethylation; Acetylation (Protein N-term)	14055000	15102000	58827000	26128000	17500000	1360000	18681	dCTP pyrophosphatase 1 OS=Homo sapiens OX=9606 GN=DCTPP1 PE=1 SV=1
O14737	46	6	6	Acetylation (Protein N-term)	6498500	17655000	35784000	46740000	84600000	4060000	14285	Programmed cell death protein 5 OS=Homo sapiens OX=9606 GN=PDCD5 PE=1 SV=3
P05187	61	23	19	Oxidation (M)	2688400	9680400	41595000	38740000	320000000	42500000	57954	Alkaline phosphatase placental type OS=Homo sapiens OX=9606 GN=ALPP PE=1 SV=2
P54819	77	18	18	Carbamidomethylation	10980000	18343000	66868000	88046000	264000000	95100000	26478	Adenylate kinase 2 mitochondrial OS=Homo sapiens OX=9606 GN=AK2 PE=1 SV=2
Q99729	24	11	11		501240000	5174100	27929000	44408000	84000000	668000000	36225	Heterogeneous nuclear ribonucleoprotein A/B OS=Homo sapiens OX=9606 GN=HNRNPAB PE=1 SV=2
Q9UI30	32	3	3		0	826790	4811400	9549800	51300000	11700000	14199	Multifunctional methyltransferase subunit TRM112-like protein OS=Homo sapiens OX=9606 GN=TRMT112 PE=1 SV=1
Q96A26	30	4	4		0	1529300	2105400	3847200	13400000	307000	17342	Protein FAM162A OS=Homo sapiens OX=9606 GN=FAM162A PE=1 SV=2
Q9P0L0	45	12	11	Acetylation (Protein N-term)	462830	6350600	32807000	60183000	172000000	20900000	27893	Vesicle-associated membrane protein-associated protein A OS=Homo sapiens OX=9606 GN=VAPA PE=1 SV=3
P55010	32	13	13	Carbamidomethylation	870780	3181800	17748000	32772000	75200000	8330000	49223	Eukaryotic translation initiation factor 5 OS=Homo sapiens OX=9606 GN=EIF5 PE=1 SV=2
Q16204	16	6	6		51572	480170	5416100	5838900	18600000	3200000	53291	Coiled-coil domain-containing protein 6 OS=Homo sapiens OX=9606 GN=CCDC6 PE=1 SV=2
Q15910	8	3	3		1905600	127270	3383900	9205200	181000000	6510000	85363	Histone-lysine N-methyltransferase EZH2 OS=Homo sapiens OX=9606 GN=EZH2 PE=1 SV=2
Q9BX68	29	3	3		0	1294300	8303800	13968000	12100000	3680000	17162	Histidine triad nucleotide-binding protein 2 mitochondrial OS=Homo sapiens OX=9606 GN=HINT2 PE=1 SV=1
P23634	22	21	12		125420	2864100	20105000	31793000	53200000	6690000	137920	Plasma membrane calcium-transporting ATPase 4 OS=Homo sapiens OX=9606 GN=ATP2B4 PE=1 SV=2
O75306	38	11	11		1258900	9726400	20353000	40987000	182000000	11600000	52546	NADH dehydrogenase [ubiquinone] iron-sulfur protein 2 mitochondrial OS=Homo sapiens OX=9606 GN=NDUFS2 PE=1 SV=2
O75390	50	16	16		8361300	22597000	52425000	70541000	250000000	11900000	51712	Citrate synthase mitochondrial OS=Homo sapiens OX=9606 GN=CS PE=1 SV=2
O76071	18	3	3	Carbamidomethylation	24822	0	2537800	4106000	16100000	11400000	37840	Probable cytosolic iron-sulfur protein assembly protein CIAO1 OS=Homo sapiens OX=9606 GN=CIAO1 PE=1 SV=1
Q03701	31	26	25	Acetylation (Protein N-term)	11096000	10522000	37532000	64806000	181000000	6940000	120974	CCAAT/enhancer-binding protein zeta OS=Homo sapiens OX=9606 GN=CEBPZ PE=1 SV=3
P51114	47	21	20		7175500	8596400	25303000	29517000	179000000	12800000	69721	Fragile X mental retardation syndrome-related protein 1 OS=Homo sapiens OX=9606 GN=FXR1 PE=1 SV=3
P45974	27	15	15	Acetylation (Protein N-term)	5174900	5460300	34631000	61649000	129000000	3930000	95786	Ubiquitin carboxyl-terminal hydrolase 5 OS=Homo sapiens OX=9606 GN=USP5 PE=1 SV=2
Q9NVN8	16	6	6		0	9649500	8234100	31583000	41600000	1130000	65573	Guanine nucleotide-binding protein-like 3-like protein OS=Homo sapiens OX=9606 GN=GNL3L PE=1 SV=1
Q8N1G4	35	12	12	Carbamidomethylation; Acetylation (Protein N-term)	0	267250	5252900	13930000	71500000	6530000	63473	Leucine-rich repeat-containing protein 47 OS=Homo sapiens OX=9606 GN=LRRC47 PE=1 SV=1
O95071	6	9	9		466820	2335400	3186600	9250800	26800000	85300	309352	E3 ubiquitin-protein ligase UBR5 OS=Homo sapiens OX=9606 GN=UBR5 PE=1 SV=2
Q12965	29	27	27		4818700	5591700	71933000	105400000	167000000	27300000	127062	Unconventional myosin-Ie OS=Homo sapiens OX=9606 GN=MYO1E PE=1 SV=2
P23921	39	22	22	Carbamidomethylation	876590	2119100	57371000	62962000	179000000	18100000	90070	Ribonucleoside-diphosphate reductase large subunit OS=Homo sapiens OX=9606 GN=RRM1 PE=1 SV=1
O43823	17	6	6	Carbamidomethylation	714300	469780	8566600	32982000	80700000	11000000	76108	A-kinase anchor protein 8 OS=Homo sapiens OX=9606 GN=AKAP8 PE=1 SV=1
Q9UHV9	45	6	6		2798500	1664000	20081000	35503000	91500000	7240000	16648	Prefoldin subunit 2 OS=Homo sapiens OX=9606 GN=PFDN2 PE=1 SV=1
Q9Y679	30	10	10	Acetylation (Protein N-term)	552780	7385400	17652000	23545000	118000000	6120000	45787	Lipid droplet-regulating VLDL assembly factor AUP1 OS=Homo sapiens OX=9606 GN=AUP1 PE=1 SV=2
P07954	58	18	18	Acetylation (Protein N-term)	23536000	29185000	72066000	32790000	501000000	51000000	54637	Fumarate hydratase mitochondrial OS=Homo sapiens OX=9606 GN=FH PE=1 SV=3
P37235	38	5	5		540050	2674900	6824100	13399000	22900000	404000	22313	Hippocalcin-like protein 1 OS=Homo sapiens OX=9606 GN=HPCAL1 PE=1 SV=3
Q16181	35	11	10	Carbamidomethylation	4544800	7289500	77396000	26222000	332000000	9110000	50680	Septin-7 OS=Homo sapiens OX=9606 GN=SEPTIN7 PE=1 SV=2
O15372	47	11	11		384560	3461500	30112000	62507000	212000000	4540000	39930	Eukaryotic translation initiation factor 3 subunit H OS=Homo sapiens OX=9606 GN=EIF3H PE=1 SV=1
P23193	30	8	8	Carbamidomethylation; Acetylation (Protein N-term)	1585900	6728300	16126000	22621000	30200000	3270000	33970	Transcription elongation factor A protein 1 OS=Homo sapiens OX=9606 GN=TCEA1 PE=1 SV=2
P51648	28	9	8		2435700	1628100	6979600	22779000	236000000	19900000	54848	Aldehyde dehydrogenase family 3 member A2 OS=Homo sapiens OX=9606 GN=ALDH3A2 PE=1 SV=1
O00571	65	48	17	Carbamidomethylation; Acetylation (Protein N-term)	5010000	14017000	64247000	59223000	171000000	47400000	73244	ATP-dependent RNA helicase DDX3X OS=Homo sapiens OX=9606 GN=DDX3X PE=1 SV=3
Q9NV06	18	5	5		5047000	831290	980790	2599400	12600000	599000	51402	DDB1- and CUL4-associated factor 13 OS=Homo sapiens OX=9606 GN=DCAF13 PE=1 SV=2
Q9BTD8	26	7	7	Carbamidomethylation; Acetylation (Protein N-term)	1526100	1731700	6412300	10507000	33500000	2850000	50414	RNA-binding protein 42 OS=Homo sapiens OX=9606 GN=RBM42 PE=1 SV=1
P15559	23	5	5		6839400	2180500	66930000	105110000	311000000	6830000	30868	NAD(P)H dehydrogenase [quinone] 1 OS=Homo sapiens OX=9606 GN=NQO1 PE=1 SV=1
P00367	46	20	10	Carbamidomethylation	73861000	28435000	27308000	50974000	106000000	7400000	61398	Glutamate dehydrogenase 1 mitochondrial OS=Homo sapiens OX=9606 GN=GLUD1 PE=1 SV=2
O43172	38	16	16	Carbamidomethylation	0	2977100	17266000	22627000	150000000	17400000	58449	U4/U6 small nuclear ribonucleoprotein Prp4 OS=Homo sapiens OX=9606 GN=PRPF4 PE=1 SV=2
Q9Y2Z4	20	6	6		216300	2045700	4284600	10509000	36200000	1230000	53199	Tyrosine--tRNA ligase mitochondrial OS=Homo sapiens OX=9606 GN=YARS2 PE=1 SV=2
Q14739	18	8	8		2790700	2009700	31436000	45361000	180000000	11100000	70703	Delta(14)-sterol reductase LBR OS=Homo sapiens OX=9606 GN=LBR PE=1 SV=2
P22307	15	8	8		1080800	2906300	17804000	16608000	38300000	3030000	58994	Sterol carrier protein 2 OS=Homo sapiens OX=9606 GN=SCP2 PE=1 SV=2
O14965	16	4	4		0	0	1958900	7720700	9580000	401000	45809	Aurora kinase A OS=Homo sapiens OX=9606 GN=AURKA PE=1 SV=2
P35579	48	100	94	Carbamidomethylation; Oxidation (M); Acetylation (Protein N-term)	24687000	79222000	297000000	471870000	3560000000	396000000	226530	Myosin-9 OS=Homo sapiens OX=9606 GN=MYH9 PE=1 SV=4
Q13573	43	18	18	Acetylation (Protein N-term)	8338800	3283400	17899000	37817000	77000000	2720000	61495	SNW domain-containing protein 1 OS=Homo sapiens OX=9606 GN=SNW1 PE=1 SV=1
P30049	58	5	5		0	2333500	7773900	16531000	51300000	2470000	17490	ATP synthase subunit delta mitochondrial OS=Homo sapiens OX=9606 GN=ATP5F1D PE=1 SV=2
Q7Z3B4	15	5	5		3047700	2070700	4111500	4660700	4310000	1950000	55436	Nucleoporin p54 OS=Homo sapiens OX=9606 GN=NUP54 PE=1 SV=2
P35250	54	12	12	Carbamidomethylation; Acetylation (Protein N-term)	1986700	7372100	11475000	11262000	79500000	10100000	39157	Replication factor C subunit 2 OS=Homo sapiens OX=9606 GN=RFC2 PE=1 SV=3
Q9Y2A7	4	3	3		35279	0	4875700	8635900	37200000	664000	128790	Nck-associated protein 1 OS=Homo sapiens OX=9606 GN=NCKAP1 PE=1 SV=1
P49916	8	6	6		2398000	6434700	8402000	12954000	92300000	31000	112907	DNA ligase 3 OS=Homo sapiens OX=9606 GN=LIG3 PE=1 SV=2
Q9NQS7	7	4	4		0	0	7568800	10393000	44900000	8990000	105429	Inner centromere protein OS=Homo sapiens OX=9606 GN=INCENP PE=1 SV=3
P28288	21	10	10		797210	1146300	4828100	6796600	69900000	1120000	75476	ATP-binding cassette sub-family D member 3 OS=Homo sapiens OX=9606 GN=ABCD3 PE=1 SV=1
Q5JWF2	10	8	6		1269400	2120900	15379000	20750000	64500000	3320000	111024	Guanine nucleotide-binding protein G(s) subunit alpha isoforms XLas OS=Homo sapiens OX=9606 GN=GNAS PE=1 SV=2
P63092	27	8	6		1269400	2120900	15379000	20750000	64500000	3320000	45665	Guanine nucleotide-binding protein G(s) subunit alpha isoforms short OS=Homo sapiens OX=9606 GN=GNAS PE=1 SV=1
P40222	31	9	9	Carbamidomethylation	567440	1596100	6235900	19930000	42100000	2400000	61891	Alpha-taxilin OS=Homo sapiens OX=9606 GN=TXLNA PE=1 SV=3
P05362	29	12	12	Carbamidomethylation	480530	10161000	15292000	16420000	29100000	1160000	57825	Intercellular adhesion molecule 1 OS=Homo sapiens OX=9606 GN=ICAM1 PE=1 SV=2
P30837	19	6	6		0	0	5151600	14009000	80600000	1040000	57206	Aldehyde dehydrogenase X mitochondrial OS=Homo sapiens OX=9606 GN=ALDH1B1 PE=1 SV=3
O60936	57	6	6	Carbamidomethylation	2453700	0	5524000	11293000	12200000	749000	22629	Nucleolar protein 3 OS=Homo sapiens OX=9606 GN=NOL3 PE=1 SV=2
Q92974	24	14	14		1672900	541680	4791100	11768000	47300000	542000	111543	Rho guanine nucleotide exchange factor 2 OS=Homo sapiens OX=9606 GN=ARHGEF2 PE=1 SV=4
Q3LXA3	23	8	8	Carbamidomethylation	96201	0	4817400	6982400	56800000	1030000	58947	Triokinase/FMN cyclase OS=Homo sapiens OX=9606 GN=TKFC PE=1 SV=2
P04844	51	23	23		970170	770610	22160000	33035000	259000000	24300000	69284	Dolichyl-diphosphooligosaccharide--protein glycosyltransferase subunit 2 OS=Homo sapiens OX=9606 GN=RPN2 PE=1 SV=3
Q9NQG5	24	4	4		0	3542200	4155100	8051400	22300000	700000	36900	Regulation of nuclear pre-mRNA domain-containing protein 1B OS=Homo sapiens OX=9606 GN=RPRD1B PE=1 SV=1
Q16740	26	4	4		2099700	103390	2854500	5630400	2680000	5510000	30180	ATP-dependent Clp protease proteolytic subunit mitochondrial OS=Homo sapiens OX=9606 GN=CLPP PE=1 SV=1
P25787	45	8	8		2678500	2253900	13296000	22864000	117000000	9550000	25899	Proteasome subunit alpha type-2 OS=Homo sapiens OX=9606 GN=PSMA2 PE=1 SV=2
Q8IY37	14	10	10		10294000	3543100	24604000	42521000	74300000	3380000	129545	Probable ATP-dependent RNA helicase DHX37 OS=Homo sapiens OX=9606 GN=DHX37 PE=1 SV=1
P62070	32	5	3		2691900	17629000	1389000	66920000	21400000	4470000	23400	Ras-related protein R-Ras2 OS=Homo sapiens OX=9606 GN=RRAS2 PE=1 SV=1
P49755	39	9	9	Oxidation (M)	2982900	897220	3707300	10116000	34800000	13600000	24976	Transmembrane emp24 domain-containing protein 10 OS=Homo sapiens OX=9606 GN=TMED10 PE=1 SV=2
P17813	12	7	7	Carbamidomethylation	310360	3652300	17437000	22680000	79500000	2500000	70578	Endoglin OS=Homo sapiens OX=9606 GN=ENG PE=1 SV=2
P49585	32	7	7		327120	866050	3867900	6413900	34100000	3770000	41731	Choline-phosphate cytidylyltransferase A OS=Homo sapiens OX=9606 GN=PCYT1A PE=1 SV=2
Q9UL46	49	9	9		1201900	0	43293000	74674000	38500000	2690000	27402	Proteasome activator complex subunit 2 OS=Homo sapiens OX=9606 GN=PSME2 PE=1 SV=4
P20962	64	5	5	Acetylation (Protein N-term)	18216000	8731700	76196000	22736000	253000000	21100000	11530	Parathymosin OS=Homo sapiens OX=9606 GN=PTMS PE=1 SV=2
Q6ZXV5	12	7	7		117750	154830	108590000	247940000	771000	0	104009	Protein O-mannosyl-transferase TMTC3 OS=Homo sapiens OX=9606 GN=TMTC3 PE=1 SV=2
P61619	10	3	3		294250	4051400	10716000	17798000	53400000	32900000	52265	Protein transport protein Sec61 subunit alpha isoform 1 OS=Homo sapiens OX=9606 GN=SEC61A1 PE=1 SV=2
Q9Y5B6	12	6	6		258910	393670	3171100	4010800	8460000	5820000	104804	PAX3- and PAX7-binding protein 1 OS=Homo sapiens OX=9606 GN=PAXBP1 PE=1 SV=2
Q8WTV0	16	6	6		0	0	1280800	3622600	89600000	1360000	60878	Scavenger receptor class B member 1 OS=Homo sapiens OX=9606 GN=SCARB1 PE=1 SV=1
Q2TAY7	28	11	11		61459000	9088100	33834000	47410000	68600000	1910000	57544	WD40 repeat-containing protein SMU1 OS=Homo sapiens OX=9606 GN=SMU1 PE=1 SV=2
Q16762	25	4	4		75802	1420700	4256800	8671900	11700000	814000	33429	Thiosulfate sulfurtransferase OS=Homo sapiens OX=9606 GN=TST PE=1 SV=4
O14964	6	3	3		1201200	3081000	3866600	2747600	985000	5810000	86192	Hepatocyte growth factor-regulated tyrosine kinase substrate OS=Homo sapiens OX=9606 GN=HGS PE=1 SV=1
Q96C19	45	9	9	Carbamidomethylation; Acetylation (Protein N-term)	8902100	704540	10393000	13506000	28200000	4090000	26697	EF-hand domain-containing protein D2 OS=Homo sapiens OX=9606 GN=EFHD2 PE=1 SV=1
O00303	36	11	11		45316	1222700	22021000	45002000	304000000	11500000	37564	Eukaryotic translation initiation factor 3 subunit F OS=Homo sapiens OX=9606 GN=EIF3F PE=1 SV=1
A0FGR8	22	14	14		429060	10194000	38841000	54813000	97800000	18800000	102357	Extended synaptotagmin-2 OS=Homo sapiens OX=9606 GN=ESYT2 PE=1 SV=1
Q9NYL9	32	7	6	Carbamidomethylation	1724500	2014400	18641000	32335000	82600000	3950000	39595	Tropomodulin-3 OS=Homo sapiens OX=9606 GN=TMOD3 PE=1 SV=1
Q9Y2Q5	52	3	3		0	1590700	16144000	30694000	21900000	436000	13508	Ragulator complex protein LAMTOR2 OS=Homo sapiens OX=9606 GN=LAMTOR2 PE=1 SV=1
Q14318	28	8	8	Carbamidomethylation	0	691350	5666100	13065000	75900000	362000	44562	Peptidyl-prolyl cis-trans isomerase FKBP8 OS=Homo sapiens OX=9606 GN=FKBP8 PE=1 SV=2
P20674	63	11	11		104740	543580	9052000	47284000	68300000	6010000	16762	Cytochrome c oxidase subunit 5A mitochondrial OS=Homo sapiens OX=9606 GN=COX5A PE=1 SV=2
O14646	7	6	5		218310	1026800	11246000	22579000	10100000	99600	196687	Chromodomain-helicase-DNA-binding protein 1 OS=Homo sapiens OX=9606 GN=CHD1 PE=1 SV=2
Q9UBC2	15	8	8	Acetylation (Protein N-term)	266980	199530	10857000	4742100	6550000	2070000	94255	Epidermal growth factor receptor substrate 15-like 1 OS=Homo sapiens OX=9606 GN=EPS15L1 PE=1 SV=1
P63208	37	8	8		0	0	6948200	13188000	208000000	27400000	18658	S-phase kinase-associated protein 1 OS=Homo sapiens OX=9606 GN=SKP1 PE=1 SV=2
Q7Z7K6	48	10	10	Acetylation (Protein N-term)	430630	860310	17301000	65529000	54500000	6300000	29946	Centromere protein V OS=Homo sapiens OX=9606 GN=CENPV PE=1 SV=1
O95292	46	10	9		1379100	8619300	17346000	13363000	97600000	20200000	27228	Vesicle-associated membrane protein-associated protein B/C OS=Homo sapiens OX=9606 GN=VAPB PE=1 SV=3
P10606	52	9	9		672830	1121000	27495000	156230000	438000000	16100000	13696	Cytochrome c oxidase subunit 5B mitochondrial OS=Homo sapiens OX=9606 GN=COX5B PE=1 SV=2
Q92552	30	9	9		2211100	8644800	21219000	18557000	74400000	2690000	47611	28S ribosomal protein S27 mitochondrial OS=Homo sapiens OX=9606 GN=MRPS27 PE=1 SV=3
Q01082	25	36	35		28809000	47724000	49234000	98254000	687000000	2970000000	274608	Spectrin beta chain non-erythrocytic 1 OS=Homo sapiens OX=9606 GN=SPTBN1 PE=1 SV=2
O75940	38	6	6	Carbamidomethylation	0	241680	6236700	13122000	32100000	12900000	26711	Survival of motor neuron-related-splicing factor 30 OS=Homo sapiens OX=9606 GN=SMNDC1 PE=1 SV=1
Q96T37	19	10	10		2596700	1964900	6860400	7086600	30200000	2360000	107188	RNA-binding protein 15 OS=Homo sapiens OX=9606 GN=RBM15 PE=1 SV=2
Q7LBC6	5	4	4		2010600	0	353770	1442900	0	3200000	191580	Lysine-specific demethylase 3B OS=Homo sapiens OX=9606 GN=KDM3B PE=1 SV=2
O60216	21	8	8		152910	435480	5214800	10118000	33300000	929000	71690	Double-strand-break repair protein rad21 homolog OS=Homo sapiens OX=9606 GN=RAD21 PE=1 SV=2
Q9BRX8	24	6	6		90445	617510	8438300	12294000	51500000	2180000	25764	Peroxiredoxin-like 2A OS=Homo sapiens OX=9606 GN=PRXL2A PE=1 SV=3
Q7KZF4	47	39	39	Acetylation (Protein N-term)	7144500	28664000	140580000	208300000	1170000000	45100000	101997	Staphylococcal nuclease domain-containing protein 1 OS=Homo sapiens OX=9606 GN=SND1 PE=1 SV=1
Q7L592	20	5	5		31413	443420	4003900	1743500	18500000	135000	49238	Protein arginine methyltransferase NDUFAF7 mitochondrial OS=Homo sapiens OX=9606 GN=NDUFAF7 PE=1 SV=1
O14744	32	14	14	Acetylation (Protein N-term)	0	2623900	6564300	25339000	137000000	921000000	72684	Protein arginine N-methyltransferase 5 OS=Homo sapiens OX=9606 GN=PRMT5 PE=1 SV=4
Q9UMS4	63	20	20	Carbamidomethylation; Acetylation (Protein N-term)	9783100	4769300	62156000	110700000	664000000	44900000	55181	Pre-mRNA-processing factor 19 OS=Homo sapiens OX=9606 GN=PRPF19 PE=1 SV=1
P11586	54	44	44	Carbamidomethylation; Acetylation (Protein N-term)	34641000	61110000	141770000	208930000	1980000000	72400000	101531	C-1-tetrahydrofolate synthase cytoplasmic OS=Homo sapiens OX=9606 GN=MTHFD1 PE=1 SV=4
Q9BTX1	17	7	7		8601800	2322100	8801000	23288000	48600000	1680000	76305	Nucleoporin NDC1 OS=Homo sapiens OX=9606 GN=NDC1 PE=1 SV=2
P42765	58	14	14	Carbamidomethylation	3647800	2137900	27780000	34023000	50100000	12800000	41924	3-ketoacyl-CoA thiolase mitochondrial OS=Homo sapiens OX=9606 GN=ACAA2 PE=1 SV=2
Q9NNW7	16	4	4		0	0	1376100	5201200	5320000	486000	56507	Thioredoxin reductase 2 mitochondrial OS=Homo sapiens OX=9606 GN=TXNRD2 PE=1 SV=3
P00387	69	17	17	Carbamidomethylation	948600	5522100	192270000	131500000	460000000	37400000	34235	NADH-cytochrome b5 reductase 3 OS=Homo sapiens OX=9606 GN=CYB5R3 PE=1 SV=3
P35244	55	4	4		43742	506780	1718100	9477800	41600000	1510000	13569	Replication protein A 14 kDa subunit OS=Homo sapiens OX=9606 GN=RPA3 PE=1 SV=1
Q9NT62	11	3	3	Acetylation (Protein N-term)	0	1197300	3830900	5422200	4610000	219000	35864	Ubiquitin-like-conjugating enzyme ATG3 OS=Homo sapiens OX=9606 GN=ATG3 PE=1 SV=1
P41227	43	6	6		0	0	13612000	20465000	61800000	899000	26458	N-alpha-acetyltransferase 10 OS=Homo sapiens OX=9606 GN=NAA10 PE=1 SV=1
Q9BV38	20	6	6		420210	6490300	10254000	17360000	56800000	1840000	47405	WD repeat-containing protein 18 OS=Homo sapiens OX=9606 GN=WDR18 PE=1 SV=2
Q96TC7	22	6	6		3489600	5111700	3185500	11371000	12900000	1130000	52118	Regulator of microtubule dynamics protein 3 OS=Homo sapiens OX=9606 GN=RMDN3 PE=1 SV=2
O15269	21	6	6		108270	0	4153900	1697100	23500000	3180000	52744	Serine palmitoyltransferase 1 OS=Homo sapiens OX=9606 GN=SPTLC1 PE=1 SV=1
Q9H2U1	26	21	21	Carbamidomethylation	134490	351700	8631900	14909000	43100000	12400000	114760	ATP-dependent DNA/RNA helicase DHX36 OS=Homo sapiens OX=9606 GN=DHX36 PE=1 SV=2
Q9NX40	52	6	6		5083600	7484700	5589800	7825600	22800000	703000	27626	OCIA domain-containing protein 1 OS=Homo sapiens OX=9606 GN=OCIAD1 PE=1 SV=1
P49770	26	6	6		338000	753760	4484200	8832300	15700000	842000	38990	Translation initiation factor eIF-2B subunit beta OS=Homo sapiens OX=9606 GN=EIF2B2 PE=1 SV=3
Q969X6	24	9	9		0	0	3963600	6084100	22700000	3320000	76890	U3 small nucleolar RNA-associated protein 4 homolog OS=Homo sapiens OX=9606 GN=UTP4 PE=1 SV=1
P11172	22	7	7		0	661900	6156900	12277000	43400000	2530000	52222	Uridine 5'-monophosphate synthase OS=Homo sapiens OX=9606 GN=UMPS PE=1 SV=1
P00492	44	9	9	Carbamidomethylation	35130	632010	8454200	20151000	68800000	4870000	24579	Hypoxanthine-guanine phosphoribosyltransferase OS=Homo sapiens OX=9606 GN=HPRT1 PE=1 SV=2
Q14847	50	11	11		1312100000	35003000	115490000	155920000	392000000	20400000	29717	LIM and SH3 domain protein 1 OS=Homo sapiens OX=9606 GN=LASP1 PE=1 SV=2
Q9NYU2	17	15	15		1220700	6772800	33329000	45339000	104000000	17700000	177189	UDP-glucose:glycoprotein glucosyltransferase 1 OS=Homo sapiens OX=9606 GN=UGGT1 PE=1 SV=3
O15173	24	5	5		0	4610900	9191800	14369000	88400000	11000000	23818	Membrane-associated progesterone receptor component 2 OS=Homo sapiens OX=9606 GN=PGRMC2 PE=1 SV=1
P49720	40	5	5	Acetylation (Protein N-term)	0	0	1280900	2232100	34900000	24700000	22949	Proteasome subunit beta type-3 OS=Homo sapiens OX=9606 GN=PSMB3 PE=1 SV=2
P19404	28	6	6		231250	6545800	3829000	7523000	18800000	422000	27392	NADH dehydrogenase [ubiquinone] flavoprotein 2 mitochondrial OS=Homo sapiens OX=9606 GN=NDUFV2 PE=1 SV=2
P00533	18	15	15		2091200	2550600	55653000	19332000	250000000	7570000	134277	Epidermal growth factor receptor OS=Homo sapiens OX=9606 GN=EGFR PE=1 SV=2
Q9GZL7	25	5	5		0	0	2547300	1799700	36000000	450000	47708	Ribosome biogenesis protein WDR12 OS=Homo sapiens OX=9606 GN=WDR12 PE=1 SV=2
P46063	17	7	7		1948300	1157000	9321200	21302000	123000000	28700000	73457	ATP-dependent DNA helicase Q1 OS=Homo sapiens OX=9606 GN=RECQL PE=1 SV=3
P54289	6	4	4		10790000	12764000	16027000	24868000	21700000	16400000	124568	Voltage-dependent calcium channel subunit alpha-2/delta-1 OS=Homo sapiens OX=9606 GN=CACNA2D1 PE=1 SV=3
O43159	29	8	8	Acetylation (Protein N-term)	0	113990	3542500	11709000	22700000	299000	50715	Ribosomal RNA-processing protein 8 OS=Homo sapiens OX=9606 GN=RRP8 PE=1 SV=2
O75691	12	24	24		5128000	2834300	22066000	38075000	76900000	3820000	318385	Small subunit processome component 20 homolog OS=Homo sapiens OX=9606 GN=UTP20 PE=1 SV=3
O95347	24	21	21		4551800	45497000	36030000	53358000	103000000	62500000	135656	Structural maintenance of chromosomes protein 2 OS=Homo sapiens OX=9606 GN=SMC2 PE=1 SV=2
Q99986	21	6	6		0	61733	3532400	8438200	0	573000	45476	Serine/threonine-protein kinase VRK1 OS=Homo sapiens OX=9606 GN=VRK1 PE=1 SV=1
Q5T3I0	36	10	10	Acetylation (Protein N-term)	128370	925820	9263500	41287000	60500000	33400000	50381	G patch domain-containing protein 4 OS=Homo sapiens OX=9606 GN=GPATCH4 PE=1 SV=2
P08195	51	36	36	Oxidation (M); Acetylation (Protein N-term)	20390000	16727000	72298000	108470000	854000000	58400000	67994	4F2 cell-surface antigen heavy chain OS=Homo sapiens OX=9606 GN=SLC3A2 PE=1 SV=3
Q9UKV3	38	36	36	Carbamidomethylation	8013200	62534000	87588000	136070000	117000000	23700000	151861	Apoptotic chromatin condensation inducer in the nucleus OS=Homo sapiens OX=9606 GN=ACIN1 PE=1 SV=2
P30519	55	13	13	Acetylation (Protein N-term)	171890	1454200	12589000	19848000	105000000	11900000	36033	Heme oxygenase 2 OS=Homo sapiens OX=9606 GN=HMOX2 PE=1 SV=2
P21127	11	8	8		0	6943300	10013000	17090000	20200000	2060000	92620	Cyclin-dependent kinase 11B OS=Homo sapiens OX=9606 GN=CDK11B PE=1 SV=4
P78310	24	5	5		0	990020	6291700	15119000	117000000	6040000	40030	Coxsackievirus and adenovirus receptor OS=Homo sapiens OX=9606 GN=CXADR PE=1 SV=1
P00403	31	6	6	Oxidation (M)	0	120090	3485900	9695400	15700000	10700000	25565	Cytochrome c oxidase subunit 2 OS=Homo sapiens OX=9606 GN=MT-CO2 PE=1 SV=1
P12268	42	23	21	Carbamidomethylation	18097000	13488000	58475000	105150000	332000000	72000000	55805	Inosine-5'-monophosphate dehydrogenase 2 OS=Homo sapiens OX=9606 GN=IMPDH2 PE=1 SV=2
Q03518	26	10	9		4475600	6858000	11320000	16166000	16900000	2580000	87218	Antigen peptide transporter 1 OS=Homo sapiens OX=9606 GN=TAP1 PE=1 SV=2
Q9BQE3	83	116	8	Carbamidomethylation; Oxidation (M)	4655800	2266900	68554000	72604000	257000000	6620000	49895	Tubulin alpha-1C chain OS=Homo sapiens OX=9606 GN=TUBA1C PE=1 SV=1
Q9Y676	34	5	5		37586000	41234000	167200000	77980000	0	0	29396	28S ribosomal protein S18b mitochondrial OS=Homo sapiens OX=9606 GN=MRPS18B PE=1 SV=1
Q8IYB8	6	4	4		183970	2360900	4443600	4669700	20300000	4110000	87991	ATP-dependent RNA helicase SUPV3L1 mitochondrial OS=Homo sapiens OX=9606 GN=SUPV3L1 PE=1 SV=1
O94826	38	16	16	Carbamidomethylation; Acetylation (Protein N-term)	4484400	17801000	41344000	30613000	183000000	16100000	67455	Mitochondrial import receptor subunit TOM70 OS=Homo sapiens OX=9606 GN=TOMM70 PE=1 SV=1
P19388	32	4	4		429260	11483000	2092200	5188200	25200000	866000	24551	DNA-directed RNA polymerases I II and III subunit RPABC1 OS=Homo sapiens OX=9606 GN=POLR2E PE=1 SV=4
P51532	15	18	13		550960	3043700	10951000	18881000	47500000	821000	184644	Transcription activator BRG1 OS=Homo sapiens OX=9606 GN=SMARCA4 PE=1 SV=2
P41567	65	7	7	Carbamidomethylation; Acetylation (Protein N-term)	0	542810	10266000	24349000	125000000	3950000	12732	Eukaryotic translation initiation factor 1 OS=Homo sapiens OX=9606 GN=EIF1 PE=1 SV=1
Q9Y450	16	5	5		0	669080	1636400	3371300	1620000	2350000	75473	HBS1-like protein OS=Homo sapiens OX=9606 GN=HBS1L PE=1 SV=1
P18859	49	6	6		0	0	1045100	6344000	17000000	13500000	12588	ATP synthase-coupling factor 6 mitochondrial OS=Homo sapiens OX=9606 GN=ATP5PF PE=1 SV=1
P07711	15	3	3		1056800	749670	6501000	8776500	1590000	2050000	37564	Procathepsin L OS=Homo sapiens OX=9606 GN=CTSL PE=1 SV=2
O75489	47	13	13		780700	1585400	18434000	29236000	498000000	45500000	30242	NADH dehydrogenase [ubiquinone] iron-sulfur protein 3 mitochondrial OS=Homo sapiens OX=9606 GN=NDUFS3 PE=1 SV=1
Q9BQG0	47	55	55	Carbamidomethylation; Acetylation (Protein N-term)	10774000	22420000	38814000	98943000	374000000	38100000	148854	Myb-binding protein 1A OS=Homo sapiens OX=9606 GN=MYBBP1A PE=1 SV=2
Q9NRX1	34	5	5	Carbamidomethylation	6875600	17271000	3123200	1946900	35600000	2170000	27924	RNA-binding protein PNO1 OS=Homo sapiens OX=9606 GN=PNO1 PE=1 SV=1
O60287	10	14	14	Acetylation (Protein N-term)	214870	433980	15181000	20238000	36000000	600000	254386	Nucleolar pre-ribosomal-associated protein 1 OS=Homo sapiens OX=9606 GN=URB1 PE=1 SV=4
Q8NDX5	10	4	3		0	181180	2625600	3989800	302000	7130000	106161	Polyhomeotic-like protein 3 OS=Homo sapiens OX=9606 GN=PHC3 PE=1 SV=1
P30876	25	21	21		4278700	12249000	27955000	48782000	111000000	378000000	133896	DNA-directed RNA polymerase II subunit RPB2 OS=Homo sapiens OX=9606 GN=POLR2B PE=1 SV=1
Q96PU8	18	4	4		116130	521720	3484400	5509100	0	560000	37671	Protein quaking OS=Homo sapiens OX=9606 GN=QKI PE=1 SV=1
Q8NFH5	58	10	10	Carbamidomethylation; Acetylation (Protein N-term)	3540500	888660	9146000	15881000	37000000	1880000	34774	Nucleoporin NUP35 OS=Homo sapiens OX=9606 GN=NUP35 PE=1 SV=1
O96000	31	4	4		499850	1953600	3303500	9459500	6790000	567000	20777	NADH dehydrogenase [ubiquinone] 1 beta subcomplex subunit 10 OS=Homo sapiens OX=9606 GN=NDUFB10 PE=1 SV=3
Q9BWJ5	59	4	4	Carbamidomethylation; Acetylation (Protein N-term)	606140	306310	3285300	4527500	26100000	861000	10135	Splicing factor 3B subunit 5 OS=Homo sapiens OX=9606 GN=SF3B5 PE=1 SV=1
Q92917	53	16	16	Carbamidomethylation; Acetylation (Protein N-term)	4261100	650050	18973000	25706000	23800000	114000000	52229	G-patch domain and KOW motifs-containing protein OS=Homo sapiens OX=9606 GN=GPKOW PE=1 SV=2
Q8WXI9	27	8	7	Oxidation (M)	887930	1459400	6436100	106240000	33100000	1160000	65261	Transcriptional repressor p66-beta OS=Homo sapiens OX=9606 GN=GATAD2B PE=1 SV=1
Q13636	37	6	5		5149500	1232400	743130	2682100	85700000	101000	21569	Ras-related protein Rab-31 OS=Homo sapiens OX=9606 GN=RAB31 PE=1 SV=1
O75947	67	9	9		602780	3217000	16419000	27627000	126000000	18000000	18491	ATP synthase subunit d mitochondrial OS=Homo sapiens OX=9606 GN=ATP5PD PE=1 SV=3
Q96EY7	18	8	8		0	433980	9262000	8960100	89700000	4040000	78550	Pentatricopeptide repeat domain-containing protein 3 mitochondrial OS=Homo sapiens OX=9606 GN=PTCD3 PE=1 SV=3
Q9NPD8	29	4	4	Carbamidomethylation	145260	165720	9953300	11570000	26000000	1350000	22521	Ubiquitin-conjugating enzyme E2 T OS=Homo sapiens OX=9606 GN=UBE2T PE=1 SV=1
Q9P258	54	21	21	Carbamidomethylation; Oxidation (M)	675030	29057000	65846000	130740000	293000000	23000000	56085	Protein RCC2 OS=Homo sapiens OX=9606 GN=RCC2 PE=1 SV=2
Q9NQ29	17	6	3		3710700	3318100	20592000	7285500	5750000	47100000	43728	Putative RNA-binding protein Luc7-like 1 OS=Homo sapiens OX=9606 GN=LUC7L PE=1 SV=1
Q96IR7	49	10	10		919010	6798700	29651000	52306000	205000000	10900000	39386	4-hydroxyphenylpyruvate dioxygenase-like protein OS=Homo sapiens OX=9606 GN=HPDL PE=1 SV=1
Q12788	30	14	14	Carbamidomethylation	2502500	899560	11030000	20382000	98500000	26600000	89035	Transducin beta-like protein 3 OS=Homo sapiens OX=9606 GN=TBL3 PE=1 SV=2
Q9NZB2	30	20	20	Carbamidomethylation; Oxidation (M)	111710000	29066000	24805000	33055000	87200000	31300000	121888	Constitutive coactivator of PPAR-gamma-like protein 1 OS=Homo sapiens OX=9606 GN=FAM120A PE=1 SV=2
Q8TEQ6	12	10	10	Carbamidomethylation	855790	242970	6103400	14722000	58900000	4100000	168589	Gem-associated protein 5 OS=Homo sapiens OX=9606 GN=GEMIN5 PE=1 SV=3
Q13177	44	13	13	Carbamidomethylation; Acetylation (Protein N-term)	23609000	15728000	23387000	54932000	125000000	4010000	58043	Serine/threonine-protein kinase PAK 2 OS=Homo sapiens OX=9606 GN=PAK2 PE=1 SV=3
Q9UJU6	30	10	10	Carbamidomethylation	3301400	4049100	17844000	27786000	43100000	3100000	48207	Drebrin-like protein OS=Homo sapiens OX=9606 GN=DBNL PE=1 SV=1
Q04323	31	4	4		2248700	10122000	6986600	19190000	47500000	8620000	33325	UBX domain-containing protein 1 OS=Homo sapiens OX=9606 GN=UBXN1 PE=1 SV=2
Q86VP6	18	16	16	Acetylation (Protein N-term)	5039200	6541800	20667000	50659000	318000000	606000000	136375	Cullin-associated NEDD8-dissociated protein 1 OS=Homo sapiens OX=9606 GN=CAND1 PE=1 SV=2
Q9NSD9	16	7	7		0	72582	8403700	13429000	129000000	2280000	66116	Phenylalanine--tRNA ligase beta subunit OS=Homo sapiens OX=9606 GN=FARSB PE=1 SV=3
Q9BW92	12	6	6		503370	1193200	5130800	17968000	46600000	2020000	81036	Threonine--tRNA ligase mitochondrial OS=Homo sapiens OX=9606 GN=TARS2 PE=1 SV=1
Q96D46	19	5	5		0	569320	2648000	4414900	21200000	1080000	57603	60S ribosomal export protein NMD3 OS=Homo sapiens OX=9606 GN=NMD3 PE=1 SV=1
Q9UBI6	26	3	3		137030	0	24233000	34832000	87300000	10700000	8006	Guanine nucleotide-binding protein G(I)/G(S)/G(O) subunit gamma-12 OS=Homo sapiens OX=9606 GN=GNG12 PE=1 SV=3
Q9Y446	14	6	6		584390	1804200	1762000	4819200	42400000	1650000	87082	Plakophilin-3 OS=Homo sapiens OX=9606 GN=PKP3 PE=1 SV=1
O00232	17	5	5	Carbamidomethylation	0	4322200	5899200	9753800	104000000	2260000	52904	26S proteasome non-ATPase regulatory subunit 12 OS=Homo sapiens OX=9606 GN=PSMD12 PE=1 SV=3
Q9BQ67	31	10	10	Carbamidomethylation	4100700	311370	10988000	16750000	73800000	12100000	49419	Glutamate-rich WD repeat-containing protein 1 OS=Homo sapiens OX=9606 GN=GRWD1 PE=1 SV=1
Q8NI36	25	15	15		624030	6182000	30175000	28110000	103000000	9010000	105322	WD repeat-containing protein 36 OS=Homo sapiens OX=9606 GN=WDR36 PE=1 SV=1
Q14432	9	5	5	Carbamidomethylation	958130	2176100	2623500	8182100	13200000	2210000	124979	cGMP-inhibited 3' 5'-cyclic phosphodiesterase A OS=Homo sapiens OX=9606 GN=PDE3A PE=1 SV=3
Q99470	25	3	3		784390	860570	9345300	12826000	19100000	967000	23026	Stromal cell-derived factor 2 OS=Homo sapiens OX=9606 GN=SDF2 PE=1 SV=2
Q8NBJ5	33	15	15		3934700	7131500	66657000	67855000	164000000	18500000	71636	Procollagen galactosyltransferase 1 OS=Homo sapiens OX=9606 GN=COLGALT1 PE=1 SV=1
P04843	57	27	27	Carbamidomethylation	3983800	330170	50120000	76911000	749000000	28400000	68569	Dolichyl-diphosphooligosaccharide--protein glycosyltransferase subunit 1 OS=Homo sapiens OX=9606 GN=RPN1 PE=1 SV=1
O43670	14	4	4		0	1739900	11477000	12880000	57700000	2420000	50751	BUB3-interacting and GLEBS motif-containing protein ZNF207 OS=Homo sapiens OX=9606 GN=ZNF207 PE=1 SV=1
Q16540	31	3	3		612920	2287300	3178100	4171100	22300000	4960000	17781	39S ribosomal protein L23 mitochondrial OS=Homo sapiens OX=9606 GN=MRPL23 PE=1 SV=1
Q9BXS6	19	6	6	Carbamidomethylation	999350	3262100	9233900	15095000	21400000	60900000	49452	Nucleolar and spindle-associated protein 1 OS=Homo sapiens OX=9606 GN=NUSAP1 PE=1 SV=1
Q13425	10	3	3		0	0	984770	1412000	1560000	221000	57950	Beta-2-syntrophin OS=Homo sapiens OX=9606 GN=SNTB2 PE=1 SV=1
Q2NL82	38	26	26	Acetylation (Protein N-term)	1254800	3121400	30820000	76820000	515000000	37600000	91810	Pre-rRNA-processing protein TSR1 homolog OS=Homo sapiens OX=9606 GN=TSR1 PE=1 SV=1
Q13601	18	5	5		222400	0	3168500	1971000	40900000	5950000	43665	KRR1 small subunit processome component homolog OS=Homo sapiens OX=9606 GN=KRR1 PE=1 SV=4
O75643	44	79	79	Carbamidomethylation; Oxidation (M)	98370000	128030000	248820000	341410000	759000000	294000000	244505	U5 small nuclear ribonucleoprotein 200 kDa helicase OS=Homo sapiens OX=9606 GN=SNRNP200 PE=1 SV=2
Q9UPN7	8	2	2		56369	0	1565300	1380100	830000	2160000	96724	Serine/threonine-protein phosphatase 6 regulatory subunit 1 OS=Homo sapiens OX=9606 GN=PPP6R1 PE=1 SV=5
O43264	8	4	4	Acetylation (Protein N-term)	13657000	71362	4255300	7163200	13700000	5330000	88830	Centromere/kinetochore protein zw10 homolog OS=Homo sapiens OX=9606 GN=ZW10 PE=1 SV=3
Q9Y221	54	7	7		1215200	135330	5548200	10824000	101000000	24100000	20463	60S ribosome subunit biogenesis protein NIP7 homolog OS=Homo sapiens OX=9606 GN=NIP7 PE=1 SV=1
Q9H444	36	6	6	Acetylation (Protein N-term)	1126000	1726200	3968100	4669000	61800000	2890000	24950	Charged multivesicular body protein 4b OS=Homo sapiens OX=9606 GN=CHMP4B PE=1 SV=1
O43815	18	7	7		102650	146730	3652000	8166900	54300000	9550000	86132	Striatin OS=Homo sapiens OX=9606 GN=STRN PE=1 SV=4
P31689	55	15	15	Carbamidomethylation	0	1045300	5946000	9943500	242000000	13100000	44868	DnaJ homolog subfamily A member 1 OS=Homo sapiens OX=9606 GN=DNAJA1 PE=1 SV=2
P30154	23	10	6		0	59464	3472500	6665300	34700000	428000	66214	Serine/threonine-protein phosphatase 2A 65 kDa regulatory subunit A beta isoform OS=Homo sapiens OX=9606 GN=PPP2R1B PE=1 SV=3
P11279	11	5	5		1019900	65401	959630	1658600	36800000	1750000	44882	Lysosome-associated membrane glycoprotein 1 OS=Homo sapiens OX=9606 GN=LAMP1 PE=1 SV=3
Q6PIU2	21	6	6		0	0	4949700	12534000	105000000	1240000	45808	Neutral cholesterol ester hydrolase 1 OS=Homo sapiens OX=9606 GN=NCEH1 PE=1 SV=3
Q14694	37	16	16	Carbamidomethylation; Acetylation (Protein N-term)	17343000	1087900	24607000	33997000	61900000	23600000	87134	Ubiquitin carboxyl-terminal hydrolase 10 OS=Homo sapiens OX=9606 GN=USP10 PE=1 SV=2
Q15181	74	19	19	Carbamidomethylation; Acetylation (Protein N-term)	8554700	12832000	123540000	70706000	736000000	55600000	32660	Inorganic pyrophosphatase OS=Homo sapiens OX=9606 GN=PPA1 PE=1 SV=2
O15258	22	3	3	Acetylation (Protein N-term)	9540700	3560000	3460600	3445500	17400000	1400000	22958	Protein RER1 OS=Homo sapiens OX=9606 GN=RER1 PE=1 SV=1
P0DMN0	30	8	8	Oxidation (M); Acetylation (Protein N-term)	1412300	806690	29836000	43528000	0	3070000	34196	Sulfotransferase 1A4 OS=Homo sapiens OX=9606 GN=SULT1A4 PE=1 SV=1
P0DMM9	30	8	8	Oxidation (M); Acetylation (Protein N-term)	1412300	806690	29836000	43528000	0	3070000	34196	Sulfotransferase 1A3 OS=Homo sapiens OX=9606 GN=SULT1A3 PE=1 SV=1
Q96CS3	24	7	7	Acetylation (Protein N-term)	0	2298700	12312000	22282000	59200000	2640000	52624	FAS-associated factor 2 OS=Homo sapiens OX=9606 GN=FAF2 PE=1 SV=2
Q9H6R4	23	17	17		16053000	10682000	19558000	20732000	41100000	111000000	127593	Nucleolar protein 6 OS=Homo sapiens OX=9606 GN=NOL6 PE=1 SV=2
P53582	25	5	5		3031800	4407800	9946300	22194000	145000000	24500000	43215	Methionine aminopeptidase 1 OS=Homo sapiens OX=9606 GN=METAP1 PE=1 SV=2
O60869	38	5	5	Acetylation (Protein N-term)	2231900	18597000	25288000	30462000	165000000	9070000	16369	Endothelial differentiation-related factor 1 OS=Homo sapiens OX=9606 GN=EDF1 PE=1 SV=1
P62195	49	18	18	Carbamidomethylation; Oxidation (M); Acetylation (Protein N-term)	4854100	16460000	30408000	30636000	206000000	12800000	45626	26S proteasome regulatory subunit 8 OS=Homo sapiens OX=9606 GN=PSMC5 PE=1 SV=1
P35052	11	4	4		58289	9609500	10754000	17196000	7680000	4620000	61680	Glypican-1 OS=Homo sapiens OX=9606 GN=GPC1 PE=1 SV=2
P16435	44	25	25	Oxidation (M)	9060200	9198900	35361000	49820000	286000000	31800000	76690	NADPH--cytochrome P450 reductase OS=Homo sapiens OX=9606 GN=POR PE=1 SV=2
Q9HC52	19	4	4		15681000	1740200	8059100	10921000	70800000	140000000	43396	Chromobox protein homolog 8 OS=Homo sapiens OX=9606 GN=CBX8 PE=1 SV=3
P40763	34	16	16	Acetylation (Protein N-term)	0	3679400	11963000	16403000	171000000	2370000	88068	Signal transducer and activator of transcription 3 OS=Homo sapiens OX=9606 GN=STAT3 PE=1 SV=2
Q9BRT6	33	6	6		341650	226190	10569000	23546000	158000000	27400000	15225	Protein LLP homolog OS=Homo sapiens OX=9606 GN=LLPH PE=1 SV=1
Q53GS9	26	11	11		1414200	3549900	40213000	46892000	73200000	5790000	65381	U4/U6.U5 tri-snRNP-associated protein 2 OS=Homo sapiens OX=9606 GN=USP39 PE=1 SV=2
Q5BJF6	4	4	4		1461000	0	126230	192530	0	0	95401	Outer dense fiber protein 2 OS=Homo sapiens OX=9606 GN=ODF2 PE=1 SV=1
P16455	39	5	5	Carbamidomethylation	497030	645980	4360600	5006200	5170000	164000	21646	Methylated-DNA--protein-cysteine methyltransferase OS=Homo sapiens OX=9606 GN=MGMT PE=1 SV=1
Q8NE71	52	36	36	Carbamidomethylation; Oxidation (M)	29665000	57315000	49481000	105770000	205000000	50800000	95926	ATP-binding cassette sub-family F member 1 OS=Homo sapiens OX=9606 GN=ABCF1 PE=1 SV=2
P14635	18	4	4		414310	1444700	5459900	5102300	0	0	48337	G2/mitotic-specific cyclin-B1 OS=Homo sapiens OX=9606 GN=CCNB1 PE=1 SV=1
Q6NW34	8	3	3		0	290570	2122500	4474100	3140000	0	64552	Nucleolus and neural progenitor protein OS=Homo sapiens OX=9606 GN=NEPRO PE=1 SV=3
P0DN76	19	5	5	Acetylation (Protein N-term)	4904200	91200	7395600	25257000	102000000	5500000	27872	Splicing factor U2AF 35 kDa subunit-like protein OS=Homo sapiens OX=9606 GN=U2AF1L5 PE=1 SV=1
Q01081	19	5	5	Acetylation (Protein N-term)	4904200	91200	7395600	25257000	102000000	5500000	27872	Splicing factor U2AF 35 kDa subunit OS=Homo sapiens OX=9606 GN=U2AF1 PE=1 SV=3
P31350	13	3	3		3284000	2944900	10827000	19419000	5200000	755000	44878	Ribonucleoside-diphosphate reductase subunit M2 OS=Homo sapiens OX=9606 GN=RRM2 PE=1 SV=1
Q9Y4L1	37	26	26		7566100	6722600	29057000	46042000	327000000	23400000	111335	Hypoxia up-regulated protein 1 OS=Homo sapiens OX=9606 GN=HYOU1 PE=1 SV=1
P53990	18	3	3		0	4338200	10601000	12358000	18000000	1140000	39751	IST1 homolog OS=Homo sapiens OX=9606 GN=IST1 PE=1 SV=1
P35221	25	14	12	Carbamidomethylation; Acetylation (Protein N-term)	15684000	16117000	25574000	20426000	83300000	5210000	100071	Catenin alpha-1 OS=Homo sapiens OX=9606 GN=CTNNA1 PE=1 SV=1
O00170	24	5	5		887460	7612200	7547700	10427000	34600000	2550000	37636	AH receptor-interacting protein OS=Homo sapiens OX=9606 GN=AIP PE=1 SV=2
O95881	45	4	4		0	0	2885800	8611700	27600000	7220000	19206	Thioredoxin domain-containing protein 12 OS=Homo sapiens OX=9606 GN=TXNDC12 PE=1 SV=1
Q9Y3C6	10	2	2		1257500	11896000	14412000	23047000	15800000	642000	18237	Peptidyl-prolyl cis-trans isomerase-like 1 OS=Homo sapiens OX=9606 GN=PPIL1 PE=1 SV=1
P63279	34	5	5	Carbamidomethylation	9404200	5877000	8659400	8214100	113000000	2430000	18007	SUMO-conjugating enzyme UBC9 OS=Homo sapiens OX=9606 GN=UBE2I PE=1 SV=1
P48960	13	8	7		1275800	0	4934500	7499400	46100000	23100000	91869	Adhesion G protein-coupled receptor E5 OS=Homo sapiens OX=9606 GN=ADGRE5 PE=1 SV=4
Q13057	32	12	12		598730	429440	23101000	31669000	114000000	3700000	62329	Bifunctional coenzyme A synthase OS=Homo sapiens OX=9606 GN=COASY PE=1 SV=4
Q02127	28	7	7		0	7132500	20100000	27159000	70300000	2810000	42867	Dihydroorotate dehydrogenase (quinone) mitochondrial OS=Homo sapiens OX=9606 GN=DHODH PE=1 SV=3
Q13084	46	10	10		0	0	3349900	1672400	7700000	475000	30157	39S ribosomal protein L28 mitochondrial OS=Homo sapiens OX=9606 GN=MRPL28 PE=1 SV=4
P20645	26	5	5		273730	5088800	16470000	34027000	32100000	5270000	30993	Cation-dependent mannose-6-phosphate receptor OS=Homo sapiens OX=9606 GN=M6PR PE=1 SV=1
Q5T280	26	6	6		164150	0	1909000	2686100	10800000	747000	42009	Putative methyltransferase C9orf114 OS=Homo sapiens OX=9606 GN=SPOUT1 PE=1 SV=3
Q8IYB3	15	9	9		0	477500	8807600	25056000	81200000	5050000	102335	Serine/arginine repetitive matrix protein 1 OS=Homo sapiens OX=9606 GN=SRRM1 PE=1 SV=2
Q9NY27	29	7	7	Carbamidomethylation	0	1050800	6681200	10153000	9530000	8790000	46898	Serine/threonine-protein phosphatase 4 regulatory subunit 2 OS=Homo sapiens OX=9606 GN=PPP4R2 PE=1 SV=3
Q92905	18	4	4		0	0	3585700	6689200	33100000	1200000	37579	COP9 signalosome complex subunit 5 OS=Homo sapiens OX=9606 GN=COPS5 PE=1 SV=4
Q13526	66	7	7	Carbamidomethylation; Oxidation (M); Acetylation (Protein N-term)	4226100	626890	23741000	32487000	10200000	988000	18243	Peptidyl-prolyl cis-trans isomerase NIMA-interacting 1 OS=Homo sapiens OX=9606 GN=PIN1 PE=1 SV=1
P51398	46	12	12		189070	1417600	43419000	21664000	194000000	16400000	45566	28S ribosomal protein S29 mitochondrial OS=Homo sapiens OX=9606 GN=DAP3 PE=1 SV=1
Q9NR45	22	5	5		0	153410	11264000	18423000	139000000	7180000	40308	Sialic acid synthase OS=Homo sapiens OX=9606 GN=NANS PE=1 SV=2
P63010	23	15	9		9376100	5985500	15623000	26158000	82100000	2140000	104553	AP-2 complex subunit beta OS=Homo sapiens OX=9606 GN=AP2B1 PE=1 SV=1
Q9H2G2	4	3	3		14017000	459100	3652800	5685900	25600000	130000000	142695	STE20-like serine/threonine-protein kinase OS=Homo sapiens OX=9606 GN=SLK PE=1 SV=1
Q5T8P6	7	5	4	Oxidation (M)	0	3322700	3628200	9203700	3910000	53800	113597	RNA-binding protein 26 OS=Homo sapiens OX=9606 GN=RBM26 PE=1 SV=3
Q96QK1	24	16	16	Carbamidomethylation	1540800	3150200	39996000	70098000	257000000	11600000	91707	Vacuolar protein sorting-associated protein 35 OS=Homo sapiens OX=9606 GN=VPS35 PE=1 SV=2
Q16611	28	2	2	Carbamidomethylation	0	0	990470	1639300	0	0	23409	Bcl-2 homologous antagonist/killer OS=Homo sapiens OX=9606 GN=BAK1 PE=1 SV=1
Q16637	19	3	3	Acetylation (Protein N-term)	2080300	82771	8309600	9131800	24400000	2590000	31849	Survival motor neuron protein OS=Homo sapiens OX=9606 GN=SMN1 PE=1 SV=1
O95757	19	11	8		3443200	2685500	9271200	11624000	72300000	2040000	94512	Heat shock 70 kDa protein 4L OS=Homo sapiens OX=9606 GN=HSPA4L PE=1 SV=3
P49959	14	6	6		209810	0	2755100	3197700	9110000	216000	80593	Double-strand break repair protein MRE11 OS=Homo sapiens OX=9606 GN=MRE11 PE=1 SV=3
Q9NZZ3	32	4	4		98350	0	14486000	7303000	2660000	1130000	24571	Charged multivesicular body protein 5 OS=Homo sapiens OX=9606 GN=CHMP5 PE=1 SV=1
Q13427	8	4	4	Carbamidomethylation	0	290570	2482100	3746000	4790000	30000	88617	Peptidyl-prolyl cis-trans isomerase G OS=Homo sapiens OX=9606 GN=PPIG PE=1 SV=2
P08579	39	7	6	Acetylation (Protein N-term)	228100	1526800	8820500	8026500	54500000	6780000	25486	U2 small nuclear ribonucleoprotein B'' OS=Homo sapiens OX=9606 GN=SNRPB2 PE=1 SV=1
P04899	34	9	4	Carbamidomethylation	0	0	374890	2445900	38200000	1460000	40451	Guanine nucleotide-binding protein G(i) subunit alpha-2 OS=Homo sapiens OX=9606 GN=GNAI2 PE=1 SV=3
Q8NAV1	31	6	6		0	162570	626160	5828600	42700000	3090000	37477	Pre-mRNA-splicing factor 38A OS=Homo sapiens OX=9606 GN=PRPF38A PE=1 SV=1
P62873	19	6	3	Carbamidomethylation; Acetylation (Protein N-term)	288080	58065	2802000	2668300	10300000	5680000	37377	Guanine nucleotide-binding protein G(I)/G(S)/G(T) subunit beta-1 OS=Homo sapiens OX=9606 GN=GNB1 PE=1 SV=3
Q92734	24	6	6		0	77187	13377000	23825000	113000000	81000000	43448	Protein TFG OS=Homo sapiens OX=9606 GN=TFG PE=1 SV=2
P43246	24	14	14		67000	3661300	7608000	14511000	48100000	2920000	104743	DNA mismatch repair protein Msh2 OS=Homo sapiens OX=9606 GN=MSH2 PE=1 SV=1
Q16719	47	19	19	Oxidation (M); Acetylation (Protein N-term)	14509000	16234000	102530000	83981000	171000000	75100000	52352	Kynureninase OS=Homo sapiens OX=9606 GN=KYNU PE=1 SV=1
Q9Y3D0	40	4	4	Acetylation (Protein N-term)	0	1450400	2961300	4245800	5430000	2800000	17663	Cytosolic iron-sulfur assembly component 2B OS=Homo sapiens OX=9606 GN=CIAO2B PE=1 SV=1
Q9NXV6	19	6	6	Carbamidomethylation; Acetylation (Protein N-term)	0	250200	9356300	3070000	4510000	449000	61125	CDKN2A-interacting protein OS=Homo sapiens OX=9606 GN=CDKN2AIP PE=1 SV=3
Q9Y2W2	26	10	10		4106800	3131100	17956000	20749000	81800000	5700000	69998	WW domain-binding protein 11 OS=Homo sapiens OX=9606 GN=WBP11 PE=1 SV=1
P53618	33	20	20		6501100	11930000	39694000	71126000	441000000	25800000	107142	Coatomer subunit beta OS=Homo sapiens OX=9606 GN=COPB1 PE=1 SV=3
Q9H8Y8	32	6	6		0	715410	3135100	4984400	20600000	4800000	47145	Golgi reassembly-stacking protein 2 OS=Homo sapiens OX=9606 GN=GORASP2 PE=1 SV=3
O00154	27	9	9		1947900	6562600	25967000	40143000	21500000	1830000	41796	Cytosolic acyl coenzyme A thioester hydrolase OS=Homo sapiens OX=9606 GN=ACOT7 PE=1 SV=3
Q9BRK5	45	7	7		0	386160	5477700	13178000	13100000	153000	41807	45 kDa calcium-binding protein OS=Homo sapiens OX=9606 GN=SDF4 PE=1 SV=1
O60684	19	8	6	Acetylation (Protein N-term)	43024	494180	5280400	12043000	35000000	988000	60030	Importin subunit alpha-7 OS=Homo sapiens OX=9606 GN=KPNA6 PE=1 SV=1
O95777	36	2	2		0	0	4573700	6525500	3040000	72900	10403	U6 snRNA-associated Sm-like protein LSm8 OS=Homo sapiens OX=9606 GN=LSM8 PE=1 SV=3
P62993	17	3	3		0	0	2098500	2855100	43900000	1330000	25206	Growth factor receptor-bound protein 2 OS=Homo sapiens OX=9606 GN=GRB2 PE=1 SV=1
P46087	42	32	32	Carbamidomethylation; Oxidation (M)	12620000	53838000	72415000	107660000	482000000	28800000	89302	Probable 28S rRNA (cytosine(4447)-C(5))-methyltransferase OS=Homo sapiens OX=9606 GN=NOP2 PE=1 SV=2
P61758	16	4	4		0	0	627800	4993200	57600000	2110000	22626	Prefoldin subunit 3 OS=Homo sapiens OX=9606 GN=VBP1 PE=1 SV=4
O75323	16	3	3		0	276850	5124000	23888000	20900000	8660000	33743	Protein NipSnap homolog 2 OS=Homo sapiens OX=9606 GN=NIPSNAP2 PE=1 SV=1
P51812	18	9	7	Carbamidomethylation	1531400	704810	5104400	13452000	24000000	3120000	83736	Ribosomal protein S6 kinase alpha-3 OS=Homo sapiens OX=9606 GN=RPS6KA3 PE=1 SV=1
O60925	27	3	3	Acetylation (Protein N-term)	0	2151700	5222200	8657000	10400000	4140000	14210	Prefoldin subunit 1 OS=Homo sapiens OX=9606 GN=PFDN1 PE=1 SV=2
P35251	7	8	8		226760	0	465180	1877900	6080000	4810000	128254	Replication factor C subunit 1 OS=Homo sapiens OX=9606 GN=RFC1 PE=1 SV=4
P67936	72	34	18	Carbamidomethylation; Oxidation (M); Acetylation (Protein N-term)	12761000	12430000	46138000	86805000	314000000	12500000	28522	Tropomyosin alpha-4 chain OS=Homo sapiens OX=9606 GN=TPM4 PE=1 SV=3
Q9C0J8	11	8	8		0	1833000	19420000	45483000	13200000	10700000	145891	pre-mRNA 3' end processing protein WDR33 OS=Homo sapiens OX=9606 GN=WDR33 PE=1 SV=2
Q5SW79	15	14	14	Acetylation (Protein N-term)	1665600	16174000	84680000	7235700	17700000	1540000	175292	Centrosomal protein of 170 kDa OS=Homo sapiens OX=9606 GN=CEP170 PE=1 SV=1
P36957	32	9	9		1514400	2594400	11036000	10278000	26400000	796000	48755	Dihydrolipoyllysine-residue succinyltransferase component of 2-oxoglutarate dehydrogenase complex mitochondrial OS=Homo sapiens OX=9606 GN=DLST PE=1 SV=4
P13995	45	9	9	Carbamidomethylation	0	1183700	12408000	21170000	3770000	11100000	37895	Bifunctional methylenetetrahydrofolate dehydrogenase/cyclohydrolase mitochondrial OS=Homo sapiens OX=9606 GN=MTHFD2 PE=1 SV=2
Q13610	31	9	9		694090	0	5387500	12683000	13700000	1260000	55828	Periodic tryptophan protein 1 homolog OS=Homo sapiens OX=9606 GN=PWP1 PE=1 SV=1
Q9UNM6	21	5	5		779170	652580	8423800	12193000	161000000	84200000	42946	26S proteasome non-ATPase regulatory subunit 13 OS=Homo sapiens OX=9606 GN=PSMD13 PE=1 SV=2
Q9NUQ9	37	10	10	Carbamidomethylation	3450700	6523100	19868000	29433000	52000000	7640000	36748	CYFIP-related Rac1 interactor B OS=Homo sapiens OX=9606 GN=CYRIB PE=1 SV=1
P35270	30	7	7		116380	90756	2343100	4433200	16100000	742000	28048	Sepiapterin reductase OS=Homo sapiens OX=9606 GN=SPR PE=1 SV=1
P43003	13	4	4		88199	89122	7006500	8403600	10700000	0	59572	Excitatory amino acid transporter 1 OS=Homo sapiens OX=9606 GN=SLC1A3 PE=1 SV=1
Q92597	40	11	11	Carbamidomethylation; Oxidation (M)	1133400	854930	22542000	54389000	340000000	45500000	42835	Protein NDRG1 OS=Homo sapiens OX=9606 GN=NDRG1 PE=1 SV=1
O96019	43	12	12	Acetylation (Protein N-term)	6496100	27380000	20461000	55895000	172000000	3050000	47461	Actin-like protein 6A OS=Homo sapiens OX=9606 GN=ACTL6A PE=1 SV=1
Q12846	34	6	6		7263200	20943000	37492000	63732000	55900000	4100000	34180	Syntaxin-4 OS=Homo sapiens OX=9606 GN=STX4 PE=1 SV=2
Q9Y2V2	61	8	8	Acetylation (Protein N-term)	46095000	37232000	66373000	85497000	268000000	14600000	15892	Calcium-regulated heat-stable protein 1 OS=Homo sapiens OX=9606 GN=CARHSP1 PE=1 SV=2
Q7Z739	26	8	5		125150	678640	2801600	28698000	28200000	826000	63861	YTH domain-containing family protein 3 OS=Homo sapiens OX=9606 GN=YTHDF3 PE=1 SV=1
P22059	11	5	5	Carbamidomethylation	0	520760	4032600	7738200	16500000	4880000	89421	Oxysterol-binding protein 1 OS=Homo sapiens OX=9606 GN=OSBP PE=1 SV=1
Q9BZK7	22	7	5		62049	1987000	28833000	26263000	36200000	0	55595	F-box-like/WD repeat-containing protein TBL1XR1 OS=Homo sapiens OX=9606 GN=TBL1XR1 PE=1 SV=1
P54920	43	8	8	Acetylation (Protein N-term)	0	0	5046100	8130600	18400000	530000	33233	Alpha-soluble NSF attachment protein OS=Homo sapiens OX=9606 GN=NAPA PE=1 SV=3
P60953	38	7	6	Carbamidomethylation	0	1691700	15283000	24646000	256000000	22800000	21259	Cell division control protein 42 homolog OS=Homo sapiens OX=9606 GN=CDC42 PE=1 SV=2
O00267	22	14	14		1637600	273010	9730300	9630600	68200000	2260000	121000	Transcription elongation factor SPT5 OS=Homo sapiens OX=9606 GN=SUPT5H PE=1 SV=1
Q14527	31	19	19	Carbamidomethylation	27927	4446400	13264000	28921000	60000000	20000000	113928	Helicase-like transcription factor OS=Homo sapiens OX=9606 GN=HLTF PE=1 SV=2
O95299	26	5	5		0	1749700	3502900	10378000	43200000	817000	40751	NADH dehydrogenase [ubiquinone] 1 alpha subcomplex subunit 10 mitochondrial OS=Homo sapiens OX=9606 GN=NDUFA10 PE=1 SV=1
Q96K17	63	3	3		810740	0	18242000	11450000	29800000	0	17271	Transcription factor BTF3 homolog 4 OS=Homo sapiens OX=9606 GN=BTF3L4 PE=1 SV=1
P55327	50	7	7		1795300	67884	13104000	14500000	109000000	5770000	24327	Tumor protein D52 OS=Homo sapiens OX=9606 GN=TPD52 PE=1 SV=2
Q14738	22	9	8	Oxidation (M)	1208400	2344300	11497000	15070000	17100000	728000	69992	Serine/threonine-protein phosphatase 2A 56 kDa regulatory subunit delta isoform OS=Homo sapiens OX=9606 GN=PPP2R5D PE=1 SV=1
Q9NXW2	22	5	5	Acetylation (Protein N-term)	0	0	12706000	19536000	9230000	74500	41860	DnaJ homolog subfamily B member 12 OS=Homo sapiens OX=9606 GN=DNAJB12 PE=1 SV=5
P42285	25	24	24	Oxidation (M); Acetylation (Protein N-term)	11532000	15658000	18291000	29071000	98700000	8860000	117805	Exosome RNA helicase MTR4 OS=Homo sapiens OX=9606 GN=MTREX PE=1 SV=3
Q93009	20	12	12		1380000	6516700	35110000	5893600	63500000	3420000	128302	Ubiquitin carboxyl-terminal hydrolase 7 OS=Homo sapiens OX=9606 GN=USP7 PE=1 SV=2
P53004	25	5	5		0	1692600	9535600	18708000	15500000	10700000	33428	Biliverdin reductase A OS=Homo sapiens OX=9606 GN=BLVRA PE=1 SV=2
P50579	40	14	14	Carbamidomethylation; Acetylation (Protein N-term)	490400	4647100	40471000	53156000	67100000	3870000	52892	Methionine aminopeptidase 2 OS=Homo sapiens OX=9606 GN=METAP2 PE=1 SV=1
Q96AQ6	8	4	4		0	273660	1198300	5570500	45100000	560000	80643	Pre-B-cell leukemia transcription factor-interacting protein 1 OS=Homo sapiens OX=9606 GN=PBXIP1 PE=1 SV=1
Q9UHD8	44	22	21	Carbamidomethylation	13009000	17204000	55633000	76058000	294000000	26000000	65402	Septin-9 OS=Homo sapiens OX=9606 GN=SEPTIN9 PE=1 SV=2
Q8NCA5	30	8	6		0	0	8519900	14037000	152000000	3080000	55272	Protein FAM98A OS=Homo sapiens OX=9606 GN=FAM98A PE=1 SV=2
Q9BZG1	21	4	4		238050	347370	1436500	3485500	23900000	4680000	29044	Ras-related protein Rab-34 OS=Homo sapiens OX=9606 GN=RAB34 PE=1 SV=1
P00441	42	4	4	Carbamidomethylation	1176500	1399600	3980700	12188000	57700000	6800000	15936	Superoxide dismutase [Cu-Zn] OS=Homo sapiens OX=9606 GN=SOD1 PE=1 SV=2
P57740	20	11	11		676730	1314400	10880000	12818000	38900000	2210000	106374	Nuclear pore complex protein Nup107 OS=Homo sapiens OX=9606 GN=NUP107 PE=1 SV=1
P11766	22	6	6		0	0	18985000	27588000	10500000	730000	39724	Alcohol dehydrogenase class-3 OS=Homo sapiens OX=9606 GN=ADH5 PE=1 SV=4
P00505	43	17	17		15938000	4400900	29670000	52144000	238000000	16000000	47518	Aspartate aminotransferase mitochondrial OS=Homo sapiens OX=9606 GN=GOT2 PE=1 SV=3
Q9NVU7	17	9	9		273160	3171400	17743000	31878000	63200000	3590000	79871	Protein SDA1 homolog OS=Homo sapiens OX=9606 GN=SDAD1 PE=1 SV=3
P11802	32	5	5		105280	2070100	12194000	21687000	81300000	2810000	33730	Cyclin-dependent kinase 4 OS=Homo sapiens OX=9606 GN=CDK4 PE=1 SV=2
Q5M775	20	10	10	Carbamidomethylation	3024200	864500	8644500	16889000	32400000	5650000	118585	Cytospin-B OS=Homo sapiens OX=9606 GN=SPECC1 PE=1 SV=1
P58107	27	103	95	Carbamidomethylation; Acetylation (Protein N-term)	22798000	43081000	224230000	314590000	725000000	146000000	555666	Epiplakin OS=Homo sapiens OX=9606 GN=EPPK1 PE=1 SV=3
Q9Y5L4	59	5	5	Carbamidomethylation; Acetylation (Protein N-term)	105480	231970	6140100	8373200	12100000	1960000	10500	Mitochondrial import inner membrane translocase subunit Tim13 OS=Homo sapiens OX=9606 GN=TIMM13 PE=1 SV=1
Q6YHK3	12	12	12		267480	449490	7635200	9324800	60600000	5650000	161688	CD109 antigen OS=Homo sapiens OX=9606 GN=CD109 PE=1 SV=2
Q96JB5	18	6	6	Acetylation (Protein N-term)	0	255400	2057200	7173900	52100000	2220000	56921	CDK5 regulatory subunit-associated protein 3 OS=Homo sapiens OX=9606 GN=CDK5RAP3 PE=1 SV=2
Q99584	40	7	7		1729900	7810100	14434000	19069000	74700000	7890000	11471	Protein S100-A13 OS=Homo sapiens OX=9606 GN=S100A13 PE=1 SV=1
Q9H6T3	11	5	5		37394	1082600	1853400	3168900	16100000	1470000	75719	RNA polymerase II-associated protein 3 OS=Homo sapiens OX=9606 GN=RPAP3 PE=1 SV=2
Q07065	47	22	22		84973000	71630000	136710000	240570000	289000000	33900000	66023	Cytoskeleton-associated protein 4 OS=Homo sapiens OX=9606 GN=CKAP4 PE=1 SV=2
P48556	18	3	3		0	0	7756600	1942200	42300000	17200000	39612	26S proteasome non-ATPase regulatory subunit 8 OS=Homo sapiens OX=9606 GN=PSMD8 PE=1 SV=2
Q9P015	34	8	8		60763	279660	7770900	12404000	88900000	4270000	33420	39S ribosomal protein L15 mitochondrial OS=Homo sapiens OX=9606 GN=MRPL15 PE=1 SV=1
O15042	31	21	21		16644000	20083000	36972000	66234000	378000000	12700000	118292	U2 snRNP-associated SURP motif-containing protein OS=Homo sapiens OX=9606 GN=U2SURP PE=1 SV=2
O43719	30	13	13	Carbamidomethylation; Acetylation (Protein N-term)	1786400	909210	17540000	22542000	53200000	3570000	85853	HIV Tat-specific factor 1 OS=Homo sapiens OX=9606 GN=HTATSF1 PE=1 SV=1
Q6PK04	27	6	6		97579	0	8898500	14983000	25900000	773000	33231	Coiled-coil domain-containing protein 137 OS=Homo sapiens OX=9606 GN=CCDC137 PE=1 SV=1
Q9BRA2	30	3	3	Carbamidomethylation	0	1501500	3328100	4731200	102000000	8090000	13941	Thioredoxin domain-containing protein 17 OS=Homo sapiens OX=9606 GN=TXNDC17 PE=1 SV=1
Q08257	16	3	3		111960	0	2244400	6219600	46100000	2050000	35207	Quinone oxidoreductase OS=Homo sapiens OX=9606 GN=CRYZ PE=1 SV=1
P17480	23	15	15	Carbamidomethylation; Acetylation (Protein N-term)	31892000	9352800	41000000	84432000	63700000	16300000	89406	Nucleolar transcription factor 1 OS=Homo sapiens OX=9606 GN=UBTF PE=1 SV=1
O75251	15	2	2		6243500	9771300	16300000	19871000	26700000	19800000	23564	NADH dehydrogenase [ubiquinone] iron-sulfur protein 7 mitochondrial OS=Homo sapiens OX=9606 GN=NDUFS7 PE=1 SV=3
Q99439	21	4	4	Carbamidomethylation; Acetylation (Protein N-term)	1594400	15577000	1510000	5423600	13100000	1900000	33697	Calponin-2 OS=Homo sapiens OX=9606 GN=CNN2 PE=1 SV=4
Q9UNF0	12	5	5		25713000	15150000	14072000	36779000	36300000	42300000	55739	Protein kinase C and casein kinase substrate in neurons protein 2 OS=Homo sapiens OX=9606 GN=PACSIN2 PE=1 SV=2
P23284	59	16	16	Carbamidomethylation	26089000	30517000	59478000	67651000	520000000	35500000	23743	Peptidyl-prolyl cis-trans isomerase B OS=Homo sapiens OX=9606 GN=PPIB PE=1 SV=2
P26358	14	20	20	Carbamidomethylation	5535600	6429700	17225000	30084000	67500000	10300000	183164	DNA (cytosine-5)-methyltransferase 1 OS=Homo sapiens OX=9606 GN=DNMT1 PE=1 SV=2
O15145	37	5	5		0	0	3233600	6061400	43200000	3400000	20547	Actin-related protein 2/3 complex subunit 3 OS=Homo sapiens OX=9606 GN=ARPC3 PE=1 SV=3
P09110	28	7	7		0	1058500	3853900	6379300	4720000	24100	44292	3-ketoacyl-CoA thiolase peroxisomal OS=Homo sapiens OX=9606 GN=ACAA1 PE=1 SV=2
Q53F19	11	3	3		0	2308100	1902800	6580200	1570000	15100000	70593	Nuclear cap-binding protein subunit 3 OS=Homo sapiens OX=9606 GN=NCBP3 PE=1 SV=2
Q96FX7	18	3	3		0	0	1842900	4401600	6030000	0	31382	tRNA (adenine(58)-N(1))-methyltransferase catalytic subunit TRMT61A OS=Homo sapiens OX=9606 GN=TRMT61A PE=1 SV=1
Q32P28	19	6	6		765520	172450	903980	1724200	13900000	1460000	83394	Prolyl 3-hydroxylase 1 OS=Homo sapiens OX=9606 GN=P3H1 PE=1 SV=2
Q86X55	8	2	2	Carbamidomethylation; Acetylation (Protein N-term)	259800	527180	3829600	3555900	0	185000	65854	Histone-arginine methyltransferase CARM1 OS=Homo sapiens OX=9606 GN=CARM1 PE=1 SV=3
O75439	26	9	9		129590	613910	9039800	15899000	160000000	4150000	54366	Mitochondrial-processing peptidase subunit beta OS=Homo sapiens OX=9606 GN=PMPCB PE=1 SV=2
Q9C0C2	8	7	7	Carbamidomethylation	0	4263600	5568000	5075000	17200000	779000	181795	182 kDa tankyrase-1-binding protein OS=Homo sapiens OX=9606 GN=TNKS1BP1 PE=1 SV=4
P09525	36	10	10		986680	5958600	36503000	74504000	138000000	88400000	35883	Annexin A4 OS=Homo sapiens OX=9606 GN=ANXA4 PE=1 SV=4
Q6NZI2	36	7	7	Acetylation (Protein N-term)	321830	549510	1213000	5582300	196000000	5420000	43476	Caveolae-associated protein 1 OS=Homo sapiens OX=9606 GN=CAVIN1 PE=1 SV=1
Q5VV42	8	3	3		0	122020	3173900	8451500	20200000	0	65112	Threonylcarbamoyladenosine tRNA methylthiotransferase OS=Homo sapiens OX=9606 GN=CDKAL1 PE=1 SV=1
Q9Y6G9	24	8	8		1364700	2109400	8954700	12167000	8940000	363000	56579	Cytoplasmic dynein 1 light intermediate chain 1 OS=Homo sapiens OX=9606 GN=DYNC1LI1 PE=1 SV=3
Q06265	13	5	5	Carbamidomethylation	0	424820	10611000	24272000	70600000	4180000	48949	Exosome complex component RRP45 OS=Homo sapiens OX=9606 GN=EXOSC9 PE=1 SV=3
Q9NPD3	22	4	4	Acetylation (Protein N-term)	0	138160	1932300	4156000	11600000	420000	26383	Exosome complex component RRP41 OS=Homo sapiens OX=9606 GN=EXOSC4 PE=1 SV=3
Q15005	29	5	5	Acetylation (Protein N-term)	68418	977970	8938700	17306000	43100000	3690000	25003	Signal peptidase complex subunit 2 OS=Homo sapiens OX=9606 GN=SPCS2 PE=1 SV=3
Q14197	17	3	3		0	1323800	6525900	13691000	42900000	4530000	23630	Peptidyl-tRNA hydrolase ICT1 mitochondrial OS=Homo sapiens OX=9606 GN=MRPL58 PE=1 SV=1
Q9BXW7	36	9	9		1398300	0	4776800	8107700	74900000	15100000	46321	Haloacid dehalogenase-like hydrolase domain-containing 5 OS=Homo sapiens OX=9606 GN=HDHD5 PE=1 SV=1
Q9BYN8	23	4	4		947090	1679300	2277300	4348500	31300000	665000	24212	28S ribosomal protein S26 mitochondrial OS=Homo sapiens OX=9606 GN=MRPS26 PE=1 SV=1
O15460	13	5	5		241240	5095800	17780000	11695000	22100000	1010000	60902	Prolyl 4-hydroxylase subunit alpha-2 OS=Homo sapiens OX=9606 GN=P4HA2 PE=1 SV=1
O76031	22	9	9		0	0	9925000	9932700	32200000	2170000	69224	ATP-dependent Clp protease ATP-binding subunit clpX-like mitochondrial OS=Homo sapiens OX=9606 GN=CLPX PE=1 SV=2
P52788	34	7	7	Carbamidomethylation	3946900	11037000	46389000	83353000	64200000	322000000	41268	Spermine synthase OS=Homo sapiens OX=9606 GN=SMS PE=1 SV=2
P05026	23	6	6		6266500	9625800	2535300	21144000	54700000	6140000	35061	Sodium/potassium-transporting ATPase subunit beta-1 OS=Homo sapiens OX=9606 GN=ATP1B1 PE=1 SV=1
P35580	8	11	5	Carbamidomethylation	0	40991	4748800	4048600	0	279000	228997	Myosin-10 OS=Homo sapiens OX=9606 GN=MYH10 PE=1 SV=3
P51570	15	5	5	Acetylation (Protein N-term)	668680	790880	4996200	10055000	65800000	407000000	42272	Galactokinase OS=Homo sapiens OX=9606 GN=GALK1 PE=1 SV=1
P21266	38	9	9	Carbamidomethylation	165300	2694400	10905000	25749000	344000000	24300000	26560	Glutathione S-transferase Mu 3 OS=Homo sapiens OX=9606 GN=GSTM3 PE=1 SV=3
Q7L1Q6	40	14	13		13587000	21710000	30566000	38938000	171000000	27200000	48043	Basic leucine zipper and W2 domain-containing protein 1 OS=Homo sapiens OX=9606 GN=BZW1 PE=1 SV=1
P09417	25	4	4		0	0	4869800	8853900	19800000	29300	25790	Dihydropteridine reductase OS=Homo sapiens OX=9606 GN=QDPR PE=1 SV=2
P43034	21	7	7		374350	16447000	2052400	9197800	34900000	1670000	46638	Platelet-activating factor acetylhydrolase IB subunit beta OS=Homo sapiens OX=9606 GN=PAFAH1B1 PE=1 SV=2
Q9UBK8	7	3	3		147260	695730	4231300	2046500	7350000	709000	77674	Methionine synthase reductase OS=Homo sapiens OX=9606 GN=MTRR PE=1 SV=4
O00429	21	9	9	Acetylation (Protein N-term)	260660	835530	4862700	6959300	19300000	1550000000	81877	Dynamin-1-like protein OS=Homo sapiens OX=9606 GN=DNM1L PE=1 SV=2
Q9ULW0	21	10	10	Carbamidomethylation	450360	2701600	14155000	21254000	5970000	1800000	85653	Targeting protein for Xklp2 OS=Homo sapiens OX=9606 GN=TPX2 PE=1 SV=2
P47712	7	3	3		0	1054800	20310000	1604700	15600000	393000	85239	Cytosolic phospholipase A2 OS=Homo sapiens OX=9606 GN=PLA2G4A PE=1 SV=2
P42224	19	11	11	Acetylation (Protein N-term)	9548700	2885800	11207000	16426000	41200000	3140000	87335	Signal transducer and activator of transcription 1-alpha/beta OS=Homo sapiens OX=9606 GN=STAT1 PE=1 SV=2
P82909	45	3	3		465000	156830	3497800	6229500	28200000	4940000	11466	28S ribosomal protein S36 mitochondrial OS=Homo sapiens OX=9606 GN=MRPS36 PE=1 SV=2
P08243	17	8	8		7859800	1329000	9695000	13581000	129000000	3460000	64370	Asparagine synthetase [glutamine-hydrolyzing] OS=Homo sapiens OX=9606 GN=ASNS PE=1 SV=4
Q5JTH9	30	24	24		174130000	76774000	36772000	66728000	320000000	27400000	143702	RRP12-like protein OS=Homo sapiens OX=9606 GN=RRP12 PE=1 SV=2
Q15631	19	2	2		0	229760	1741500	3469800	5950000	435000	26183	Translin OS=Homo sapiens OX=9606 GN=TSN PE=1 SV=1
Q9Y263	10	4	4		0	300770	2116000	5874400	13700000	608000	87157	Phospholipase A-2-activating protein OS=Homo sapiens OX=9606 GN=PLAA PE=1 SV=2
Q92575	23	5	5	Carbamidomethylation	1321200	2656000	6181900	14312000	13200000	20700000	56778	UBX domain-containing protein 4 OS=Homo sapiens OX=9606 GN=UBXN4 PE=1 SV=2
Q9H9Y2	30	6	6		0	69643	3905900	10510000	39300000	0	40111	Ribosome production factor 1 OS=Homo sapiens OX=9606 GN=RPF1 PE=1 SV=2
Q99720	29	3	3		55795	83549	451760	1628500	65700000	1170000	25128	Sigma non-opioid intracellular receptor 1 OS=Homo sapiens OX=9606 GN=SIGMAR1 PE=1 SV=1
O75521	29	7	7		52249	2655500	17007000	19457000	91500000	3840000	43585	Enoyl-CoA delta isomerase 2 OS=Homo sapiens OX=9606 GN=ECI2 PE=1 SV=4
Q8TEM1	18	23	23		12449000	7984500	45772000	67667000	202000000	20900000	205109	Nuclear pore membrane glycoprotein 210 OS=Homo sapiens OX=9606 GN=NUP210 PE=1 SV=3
Q9UIA9	7	5	5	Carbamidomethylation; Acetylation (Protein N-term)	41047	46187	1767800	2773900	33800000	4030000	123907	Exportin-7 OS=Homo sapiens OX=9606 GN=XPO7 PE=1 SV=3
Q99627	35	4	4		480810	2074400	9927000	19060000	16100000	619000	23226	COP9 signalosome complex subunit 8 OS=Homo sapiens OX=9606 GN=COPS8 PE=1 SV=1
Q6PJT7	20	7	7		468050	1473400	3529900	7159300	23400000	1470000	82876	Zinc finger CCCH domain-containing protein 14 OS=Homo sapiens OX=9606 GN=ZC3H14 PE=1 SV=1
P11233	49	8	4		397290	0	1738400	1727100	43300000	1970000	23567	Ras-related protein Ral-A OS=Homo sapiens OX=9606 GN=RALA PE=1 SV=1
Q9BPX5	37	2	2		0	0	13667000	19850000	43100000	1490000	16941	Actin-related protein 2/3 complex subunit 5-like protein OS=Homo sapiens OX=9606 GN=ARPC5L PE=1 SV=1
O75475	39	15	14	Carbamidomethylation	137140	4614800	10202000	29401000	17000000	280000	60103	PC4 and SFRS1-interacting protein OS=Homo sapiens OX=9606 GN=PSIP1 PE=1 SV=1
P51572	41	10	10	Oxidation (M)	17444000	8916100	24738000	43376000	173000000	8930000	27992	B-cell receptor-associated protein 31 OS=Homo sapiens OX=9606 GN=BCAP31 PE=1 SV=3
Q14146	4	4	4		2640500	927140	1176300	3659200	41200000	1650000	170543	Unhealthy ribosome biogenesis protein 2 homolog OS=Homo sapiens OX=9606 GN=URB2 PE=1 SV=2
O14925	38	3	3		5882300	412960	3211700	2086300	15000000	9150000	21943	Mitochondrial import inner membrane translocase subunit Tim23 OS=Homo sapiens OX=9606 GN=TIMM23 PE=1 SV=1
O00148	34	17	6	Carbamidomethylation; Acetylation (Protein N-term)	3668800	0	12617000	4320900	39200000	1650000	49130	ATP-dependent RNA helicase DDX39A OS=Homo sapiens OX=9606 GN=DDX39A PE=1 SV=2
P08754	40	13	8	Carbamidomethylation	3155900	142860	4167000	10512000	56300000	1880000	40532	Guanine nucleotide-binding protein G(i) subunit alpha-3 OS=Homo sapiens OX=9606 GN=GNAI3 PE=1 SV=3
P25440	17	6	5	Acetylation (Protein N-term)	0	252510	6315900	8746300	746000	127000	88061	Bromodomain-containing protein 2 OS=Homo sapiens OX=9606 GN=BRD2 PE=1 SV=2
P04183	26	3	3	Carbamidomethylation; Acetylation (Protein N-term)	0	506100	4029100	9190100	8540000	365000	25469	Thymidine kinase cytosolic OS=Homo sapiens OX=9606 GN=TK1 PE=1 SV=2
Q9NQT4	29	5	5	Carbamidomethylation	0	863940	2392600	6953700	3240000	30700000	25249	Exosome complex component RRP46 OS=Homo sapiens OX=9606 GN=EXOSC5 PE=1 SV=1
Q8NEJ9	28	5	5		0	432800	1850300	2960200	12000000	322000	35894	Neuroguidin OS=Homo sapiens OX=9606 GN=NGDN PE=1 SV=1
P14550	25	6	5	Carbamidomethylation; Acetylation (Protein N-term)	0	1558000	10872000	13167000	115000000	7200000	36573	Aldo-keto reductase family 1 member A1 OS=Homo sapiens OX=9606 GN=AKR1A1 PE=1 SV=3
Q9NZJ7	28	5	5	Acetylation (Protein N-term)	0	666860	4163000	9297600	25200000	316000	41544	Mitochondrial carrier homolog 1 OS=Homo sapiens OX=9606 GN=MTCH1 PE=1 SV=1
Q14980	37	52	52	Carbamidomethylation	13605000	36073000	88656000	108620000	273000000	38300000	238257	Nuclear mitotic apparatus protein 1 OS=Homo sapiens OX=9606 GN=NUMA1 PE=1 SV=2
O95817	60	17	17	Carbamidomethylation; Acetylation (Protein N-term)	689980	7139000	27248000	41579000	31700000	20300000	61595	BAG family molecular chaperone regulator 3 OS=Homo sapiens OX=9606 GN=BAG3 PE=1 SV=3
Q9UHB9	33	15	15	Carbamidomethylation	1224200	2021200	4329600	8919200	119000000	5190000	70730	Signal recognition particle subunit SRP68 OS=Homo sapiens OX=9606 GN=SRP68 PE=1 SV=2
Q9BZI7	13	4	4		4185800	1906200	69010000	3767200	93000000	40800000	57762	Regulator of nonsense transcripts 3B OS=Homo sapiens OX=9606 GN=UPF3B PE=1 SV=1
P61221	18	8	8		203360	4709200	16355000	23585000	158000000	10000000	67314	ATP-binding cassette sub-family E member 1 OS=Homo sapiens OX=9606 GN=ABCE1 PE=1 SV=1
Q7Z5K2	6	4	4		160020	390610	914690	2087800	2000000	664000	132945	Wings apart-like protein homolog OS=Homo sapiens OX=9606 GN=WAPL PE=1 SV=1
Q05519	24	6	6	Acetylation (Protein N-term)	41583000	44299000	23143000	58549000	36700000	6760000	53542	Serine/arginine-rich splicing factor 11 OS=Homo sapiens OX=9606 GN=SRSF11 PE=1 SV=1
Q8TAQ2	13	8	6		381300	1890200	3957500	7818400	57900000	3480000	132879	SWI/SNF complex subunit SMARCC2 OS=Homo sapiens OX=9606 GN=SMARCC2 PE=1 SV=1
Q96EP5	26	6	6	Carbamidomethylation; Acetylation (Protein N-term)	0	2476700	6461200	15046000	50300000	2140000	43383	DAZ-associated protein 1 OS=Homo sapiens OX=9606 GN=DAZAP1 PE=1 SV=1
Q9Y5L0	15	8	8	Carbamidomethylation; Acetylation (Protein N-term)	9708600	5900800	5186700	2945200	596000000	86300000	104203	Transportin-3 OS=Homo sapiens OX=9606 GN=TNPO3 PE=1 SV=3
Q13547	32	9	7		1828100	57072	13010000	16685000	58600000	1430000	55103	Histone deacetylase 1 OS=Homo sapiens OX=9606 GN=HDAC1 PE=1 SV=1
Q9NQ88	39	6	6	Carbamidomethylation	3914400	9619000	14670000	21483000	55100000	2410000	30063	Fructose-2 6-bisphosphatase TIGAR OS=Homo sapiens OX=9606 GN=TIGAR PE=1 SV=1
Q99829	17	8	8		11431000	5498200	21789000	21399000	79600000	3350000	59059	Copine-1 OS=Homo sapiens OX=9606 GN=CPNE1 PE=1 SV=1
Q6NUK1	45	18	18		139400	1292200	10137000	26380000	165000000	16800000	53354	Calcium-binding mitochondrial carrier protein SCaMC-1 OS=Homo sapiens OX=9606 GN=SLC25A24 PE=1 SV=2
Q86SX6	32	3	3	Carbamidomethylation	0	0	1756400	3212000	0	3960000	16628	Glutaredoxin-related protein 5 mitochondrial OS=Homo sapiens OX=9606 GN=GLRX5 PE=1 SV=2
P11717	2	4	4		0	3316400	2365700	2897300	55400000	817000	274373	Cation-independent mannose-6-phosphate receptor OS=Homo sapiens OX=9606 GN=IGF2R PE=1 SV=3
Q5TDH0	15	3	3		150700	1591500	1425500	2412100	0	8960000	44523	Protein DDI1 homolog 2 OS=Homo sapiens OX=9606 GN=DDI2 PE=1 SV=1
P31937	37	8	8		282370	95908	8629700	15045000	55900000	7440000	35329	3-hydroxyisobutyrate dehydrogenase mitochondrial OS=Homo sapiens OX=9606 GN=HIBADH PE=1 SV=2
O95391	12	3	3	Acetylation (Protein N-term)	0	214600	2044800	125510000	0	0	68387	Pre-mRNA-splicing factor SLU7 OS=Homo sapiens OX=9606 GN=SLU7 PE=1 SV=2
Q96T23	4	3	3		0	0	65248	861190	907000	0	163820	Remodeling and spacing factor 1 OS=Homo sapiens OX=9606 GN=RSF1 PE=1 SV=2
O15144	13	3	3		127400	699550	11950000	11382000	80700000	7390000	34333	Actin-related protein 2/3 complex subunit 2 OS=Homo sapiens OX=9606 GN=ARPC2 PE=1 SV=1
P40939	42	25	25		1905400	4736300	40292000	74774000	214000000	25200000	83000	Trifunctional enzyme subunit alpha mitochondrial OS=Homo sapiens OX=9606 GN=HADHA PE=1 SV=2
Q9NTZ6	5	3	3		0	215000	4405000	14463000	11600000	1330000	97396	RNA-binding protein 12 OS=Homo sapiens OX=9606 GN=RBM12 PE=1 SV=1
P82933	32	11	11		0	3448800	6504700	9764500	71400000	8540000	45835	28S ribosomal protein S9 mitochondrial OS=Homo sapiens OX=9606 GN=MRPS9 PE=1 SV=2
Q96QC0	20	12	11		324950	5208700	5969400	20200000	25500000	3250000	99058	Serine/threonine-protein phosphatase 1 regulatory subunit 10 OS=Homo sapiens OX=9606 GN=PPP1R10 PE=1 SV=1
O14979	39	20	19	Carbamidomethylation	826670	6305100	34589000	48172000	195000000	44500000	46438	Heterogeneous nuclear ribonucleoprotein D-like OS=Homo sapiens OX=9606 GN=HNRNPDL PE=1 SV=3
Q14166	36	16	16	Carbamidomethylation	3021500	3869700	30958000	42549000	151000000	7580000	74404	Tubulin--tyrosine ligase-like protein 12 OS=Homo sapiens OX=9606 GN=TTLL12 PE=1 SV=2
P0DPB6	19	3	3		0	1443700	4918900	5961000	30300000	427000	15237	DNA-directed RNA polymerases I and III subunit RPAC2 OS=Homo sapiens OX=9606 GN=POLR1D PE=1 SV=1
Q92882	18	3	3		3536400	0	5741000	9002300	1540000	16200	23787	Osteoclast-stimulating factor 1 OS=Homo sapiens OX=9606 GN=OSTF1 PE=1 SV=2
Q13409	33	14	14	Acetylation (Protein N-term)	9681300	4901500	37468000	49595000	77200000	4780000	71457	Cytoplasmic dynein 1 intermediate chain 2 OS=Homo sapiens OX=9606 GN=DYNC1I2 PE=1 SV=3
Q96I99	16	5	5		393200	0	1416600	2238700	34100000	1280000	46511	Succinate--CoA ligase [GDP-forming] subunit beta mitochondrial OS=Homo sapiens OX=9606 GN=SUCLG2 PE=1 SV=2
P51153	24	4	3		0	1040700	855660	2209600	27000000	3370000	22774	Ras-related protein Rab-13 OS=Homo sapiens OX=9606 GN=RAB13 PE=1 SV=1
P14923	23	12	12	Carbamidomethylation	6762500	2696300	38251000	78856000	171000000	77000000	81745	Junction plakoglobin OS=Homo sapiens OX=9606 GN=JUP PE=1 SV=3
Q15904	13	4	4		0	1478700	8373300	10162000	21700000	436000	52026	V-type proton ATPase subunit S1 OS=Homo sapiens OX=9606 GN=ATP6AP1 PE=1 SV=2
Q8TAT6	18	5	5		0	0	1417100	3471200	29900000	1720000	68120	Nuclear protein localization protein 4 homolog OS=Homo sapiens OX=9606 GN=NPLOC4 PE=1 SV=3
P07947	24	7	6	Carbamidomethylation	2197300	7784400	14982000	29496000	61000000	1580000	60801	Tyrosine-protein kinase Yes OS=Homo sapiens OX=9606 GN=YES1 PE=1 SV=3
P27361	9	2	2	Acetylation (Protein N-term)	2042000	1689300	3704600	8885700	5290000	1590000	43136	Mitogen-activated protein kinase 3 OS=Homo sapiens OX=9606 GN=MAPK3 PE=1 SV=4
Q9UJV9	17	7	7		5568000	4945300	12353000	9081100	9830000	3020000	69838	Probable ATP-dependent RNA helicase DDX41 OS=Homo sapiens OX=9606 GN=DDX41 PE=1 SV=2
B0I1T2	29	18	18	Carbamidomethylation	61933000	8664900	25245000	50068000	54900000	5260000	116442	Unconventional myosin-Ig OS=Homo sapiens OX=9606 GN=MYO1G PE=1 SV=2
O60488	23	12	9		509700	0	10399000	13975000	53400000	1850000	79188	Long-chain-fatty-acid--CoA ligase 4 OS=Homo sapiens OX=9606 GN=ACSL4 PE=1 SV=2
Q9H4A4	12	5	5		0	1181700	8110200	5016900	85400000	3650000	72596	Aminopeptidase B OS=Homo sapiens OX=9606 GN=RNPEP PE=1 SV=2
O95251	8	3	3		0	2992600	3207300	3277500	0	0	70642	Histone acetyltransferase KAT7 OS=Homo sapiens OX=9606 GN=KAT7 PE=1 SV=1
Q5J8M3	22	3	3		539200	2289600	33032000	47813000	3710000	480000	20087	ER membrane protein complex subunit 4 OS=Homo sapiens OX=9606 GN=EMC4 PE=1 SV=2
Q9H9F9	10	3	3		0	143750	524120	897780	0	0	68298	Actin-related protein 5 OS=Homo sapiens OX=9606 GN=ACTR5 PE=1 SV=2
P20839	26	9	7		0	2468700	7362400	11637000	23000000	2070000	55406	Inosine-5'-monophosphate dehydrogenase 1 OS=Homo sapiens OX=9606 GN=IMPDH1 PE=1 SV=2
Q9ULX3	16	5	5	Carbamidomethylation	0	1178300	4423300	6980400	27200000	12300000	46675	RNA-binding protein NOB1 OS=Homo sapiens OX=9606 GN=NOB1 PE=1 SV=1
P51116	35	12	10		1064000	2289600	39487000	70295000	178000000	15900000	74223	Fragile X mental retardation syndrome-related protein 2 OS=Homo sapiens OX=9606 GN=FXR2 PE=1 SV=2
O60422	10	3	3		1619300	302620	1397700	1008200	0	0	50037	One cut domain family member 3 OS=Homo sapiens OX=9606 GN=ONECUT3 PE=1 SV=2
P00374	25	5	5	Carbamidomethylation	1051600	2658700	15166000	29408000	22600000	3630000	21453	Dihydrofolate reductase OS=Homo sapiens OX=9606 GN=DHFR PE=1 SV=2
Q9Y3D9	32	3	3		365650	0	10272000	2141200	58000000	4100000	21771	28S ribosomal protein S23 mitochondrial OS=Homo sapiens OX=9606 GN=MRPS23 PE=1 SV=2
Q96EN8	16	7	7	Carbamidomethylation	0	400280	4803700	4779900	43400	22400000	98120	Molybdenum cofactor sulfurase OS=Homo sapiens OX=9606 GN=MOCOS PE=1 SV=2
Q15418	15	6	4	Carbamidomethylation	0	0	8753800	14993000	131000000	2560000	82723	Ribosomal protein S6 kinase alpha-1 OS=Homo sapiens OX=9606 GN=RPS6KA1 PE=1 SV=2
O95573	31	17	14	Acetylation (Protein N-term)	346470	2116500	20434000	17613000	65300000	1870000	80420	Long-chain-fatty-acid--CoA ligase 3 OS=Homo sapiens OX=9606 GN=ACSL3 PE=1 SV=3
P36507	25	5	4		0	1292300	11473000	15213000	10700000	13000000	44424	Dual specificity mitogen-activated protein kinase kinase 2 OS=Homo sapiens OX=9606 GN=MAP2K2 PE=1 SV=1
P49589	14	7	7		811470	36346	8766100	8978000	77800000	4030000	85473	Cysteine--tRNA ligase cytoplasmic OS=Homo sapiens OX=9606 GN=CARS1 PE=1 SV=3
Q15833	20	7	7		33499000	66144000	17609000	39370000	17200000	16600	66453	Syntaxin-binding protein 2 OS=Homo sapiens OX=9606 GN=STXBP2 PE=1 SV=2
Q96EE3	25	6	6		1471800	0	10448000	16575000	90700000	3840000	39649	Nucleoporin SEH1 OS=Homo sapiens OX=9606 GN=SEH1L PE=1 SV=3
P51553	16	3	3		1458600	64950	3795500	7276600	58500000	2490000	42794	Isocitrate dehydrogenase [NAD] subunit gamma mitochondrial OS=Homo sapiens OX=9606 GN=IDH3G PE=1 SV=1
Q9BT78	21	5	5		0	580390	713860	3628300	96300000	3110000	46269	COP9 signalosome complex subunit 4 OS=Homo sapiens OX=9606 GN=COPS4 PE=1 SV=1
Q8WVM8	41	16	16	Acetylation (Protein N-term)	1799900	4167300	8680500	15443000	72100000	8750000	72380	Sec1 family domain-containing protein 1 OS=Homo sapiens OX=9606 GN=SCFD1 PE=1 SV=4
P55957	29	5	5		498300	1685500	1612000	2789300	25500000	1010000	21995	BH3-interacting domain death agonist OS=Homo sapiens OX=9606 GN=BID PE=1 SV=1
Q9BVJ6	32	17	17	Carbamidomethylation	1990400	7624600	32728000	31522000	90600000	8980000	87978	U3 small nucleolar RNA-associated protein 14 homolog A OS=Homo sapiens OX=9606 GN=UTP14A PE=1 SV=1
O76003	22	7	7	Carbamidomethylation	0	0	11886000	23409000	89700000	5720000	37432	Glutaredoxin-3 OS=Homo sapiens OX=9606 GN=GLRX3 PE=1 SV=2
P49753	27	7	7		680450	1894300	13140000	16876000	48800000	979000	53219	Acyl-coenzyme A thioesterase 2 mitochondrial OS=Homo sapiens OX=9606 GN=ACOT2 PE=1 SV=6
Q14320	17	4	4		3290500	6214900	6018500	9807700	127000000	5290000	40242	Protein FAM50A OS=Homo sapiens OX=9606 GN=FAM50A PE=1 SV=2
Q13418	12	5	5		0	882880	3534000	8833000	21200000	2720000	51419	Integrin-linked protein kinase OS=Homo sapiens OX=9606 GN=ILK PE=1 SV=2
P42696	27	7	7		325500	3026000	6337800	14222000	64700000	6670000	48565	RNA-binding protein 34 OS=Homo sapiens OX=9606 GN=RBM34 PE=1 SV=2
O00479	36	3	3		0	0	2348100	4185300	5160000	971000	9539	High mobility group nucleosome-binding domain-containing protein 4 OS=Homo sapiens OX=9606 GN=HMGN4 PE=1 SV=3
O94966	8	4	4		631570	0	1401100	1903800	0	0	145650	Ubiquitin carboxyl-terminal hydrolase 19 OS=Homo sapiens OX=9606 GN=USP19 PE=1 SV=2
O43169	62	8	8	Acetylation (Protein N-term)	0	1435500	7379600	9532400	288000000	10200000	16695	Cytochrome b5 type B OS=Homo sapiens OX=9606 GN=CYB5B PE=1 SV=3
Q13451	16	5	5		436300	275560	13677000	7496700	15400000	13700000	51212	Peptidyl-prolyl cis-trans isomerase FKBP5 OS=Homo sapiens OX=9606 GN=FKBP5 PE=1 SV=2
O60716	16	9	9	Carbamidomethylation	0	16420	5110800	8192200	55900000	6360000	108170	Catenin delta-1 OS=Homo sapiens OX=9606 GN=CTNND1 PE=1 SV=1
P00568	56	9	9	Carbamidomethylation	1421300	3911200	25311000	40017000	197000000	14000000	21635	Adenylate kinase isoenzyme 1 OS=Homo sapiens OX=9606 GN=AK1 PE=1 SV=3
O95232	26	7	7		0	126570	1674000	11095000	43000000	2470000	51466	Luc7-like protein 3 OS=Homo sapiens OX=9606 GN=LUC7L3 PE=1 SV=2
Q96PZ0	21	10	10		106930	2690900	6771600	11806000	70200000	2210000	75035	Pseudouridylate synthase 7 homolog OS=Homo sapiens OX=9606 GN=PUS7 PE=1 SV=2
Q8WUY1	26	3	3		67404	1924400	696240	5827700	22700000	2130000	23865	Protein THEM6 OS=Homo sapiens OX=9606 GN=THEM6 PE=1 SV=2
P39656	48	13	13		12937000	13179000	21300000	35229000	236000000	9190000	50801	Dolichyl-diphosphooligosaccharide--protein glycosyltransferase 48 kDa subunit OS=Homo sapiens OX=9606 GN=DDOST PE=1 SV=4
O75787	15	3	3		0	0	4028700	856980	31400000	0	39008	Renin receptor OS=Homo sapiens OX=9606 GN=ATP6AP2 PE=1 SV=2
O94992	21	3	3	Carbamidomethylation	0	0	5017700	6294900	26900000	1470000	40623	Protein HEXIM1 OS=Homo sapiens OX=9606 GN=HEXIM1 PE=1 SV=1
Q9C005	45	2	2	Acetylation (Protein N-term)	0	0	12254000	7706700	20000000	839000	11250	Protein dpy-30 homolog OS=Homo sapiens OX=9606 GN=DPY30 PE=1 SV=1
Q9GZR2	23	6	6		2485200	2863400	57327000	13130000	381000000	27300000	46672	RNA exonuclease 4 OS=Homo sapiens OX=9606 GN=REXO4 PE=1 SV=2
Q15836	53	4	2	Acetylation (Protein N-term)	0	765620	2764500	9341900	38500000	2280000	11309	Vesicle-associated membrane protein 3 OS=Homo sapiens OX=9606 GN=VAMP3 PE=1 SV=3
P62304	25	2	2		0	32350	713370	3911000	6440000	0	10804	Small nuclear ribonucleoprotein E OS=Homo sapiens OX=9606 GN=SNRPE PE=1 SV=1
Q96ST3	7	4	4	Carbamidomethylation	0	0	779520	1345400	1750000	12500000	145175	Paired amphipathic helix protein Sin3a OS=Homo sapiens OX=9606 GN=SIN3A PE=1 SV=2
Q96CP2	64	8	8	Carbamidomethylation	13103000	9171300	21521000	30857000	35600000	2710000	14564	FLYWCH family member 2 OS=Homo sapiens OX=9606 GN=FLYWCH2 PE=1 SV=1
P16144	7	6	6		0	0	6680500	7250000	34100000	1870000	202166	Integrin beta-4 OS=Homo sapiens OX=9606 GN=ITGB4 PE=1 SV=5
P68036	59	6	6	Carbamidomethylation	0	0	4349500	16442000	305000000	7240000	17862	Ubiquitin-conjugating enzyme E2 L3 OS=Homo sapiens OX=9606 GN=UBE2L3 PE=1 SV=1
Q92614	5	7	7		161470	1825800	3192300	12468000	6300000	14800000	233113	Unconventional myosin-XVIIIa OS=Homo sapiens OX=9606 GN=MYO18A PE=1 SV=3
Q9H3G5	9	3	3		103960	139630	3523500	4171900	20400000	1060000	54164	Probable serine carboxypeptidase CPVL OS=Homo sapiens OX=9606 GN=CPVL PE=1 SV=2
Q9NY61	34	11	11	Acetylation (Protein N-term)	775340	0	5787000	15128000	201000000	9220000	63133	Protein AATF OS=Homo sapiens OX=9606 GN=AATF PE=1 SV=1
Q9NXE4	8	4	4		56423	0	746190	3384400	1860000	2590	97810	Sphingomyelin phosphodiesterase 4 OS=Homo sapiens OX=9606 GN=SMPD4 PE=1 SV=3
Q6PI48	21	7	7		6119600	2330100	12896000	9231100	97400000	5390000	73563	Aspartate--tRNA ligase mitochondrial OS=Homo sapiens OX=9606 GN=DARS2 PE=1 SV=1
P48449	10	5	5		96934	480210	8134600	19724000	50800000	10900000	83309	Lanosterol synthase OS=Homo sapiens OX=9606 GN=LSS PE=1 SV=1
Q99808	10	3	3		0	704700	4034000	1794800	5500000	0	50219	Equilibrative nucleoside transporter 1 OS=Homo sapiens OX=9606 GN=SLC29A1 PE=1 SV=3
Q8IU81	11	3	3		0	0	10771000	1457200	1190000	109000000	61688	Interferon regulatory factor 2-binding protein 1 OS=Homo sapiens OX=9606 GN=IRF2BP1 PE=1 SV=1
O60547	9	2	2	Carbamidomethylation	0	0	7021200	9131800	2880000	305000	41950	GDP-mannose 4 6 dehydratase OS=Homo sapiens OX=9606 GN=GMDS PE=1 SV=1
Q9H098	24	2	2	Acetylation (Protein N-term)	377990	895020	2378100	3305300	11900000	15300000	15558	Protein FAM107B OS=Homo sapiens OX=9606 GN=FAM107B PE=1 SV=1
P57081	11	2	2		722130	351240	1622200	3379900	1800000	14600000	45490	tRNA (guanine-N(7)-)-methyltransferase non-catalytic subunit WDR4 OS=Homo sapiens OX=9606 GN=WDR4 PE=1 SV=2
Q8N1F7	28	16	16	Carbamidomethylation; Oxidation (M)	6553600	8377800	19040000	29348000	184000000	6600000	93488	Nuclear pore complex protein Nup93 OS=Homo sapiens OX=9606 GN=NUP93 PE=1 SV=2
Q5JTZ9	10	5	5		0	5992800	11023000	19165000	6890000	1710000	107340	Alanine--tRNA ligase mitochondrial OS=Homo sapiens OX=9606 GN=AARS2 PE=1 SV=1
Q16881	33	11	11		732050	2279700	2079800	4362000	59300000	4310000	70906	Thioredoxin reductase 1 cytoplasmic OS=Homo sapiens OX=9606 GN=TXNRD1 PE=1 SV=3
Q9NX46	12	3	3	Acetylation (Protein N-term)	333150	156510	2388800	4514600	3730000	549000	38947	ADP-ribose glycohydrolase ARH3 OS=Homo sapiens OX=9606 GN=ADPRS PE=1 SV=1
Q9Y237	41	5	5		337460	2599000	17917000	11826000	1890000	2070000	13810	Peptidyl-prolyl cis-trans isomerase NIMA-interacting 4 OS=Homo sapiens OX=9606 GN=PIN4 PE=1 SV=1
Q9GZS3	39	6	6		62860	0	11393000	10583000	33500000	4560000	33581	WD repeat-containing protein 61 OS=Homo sapiens OX=9606 GN=WDR61 PE=1 SV=1
Q9NX55	51	5	5	Acetylation (Protein N-term)	0	0	7892600	6219600	108000000	49700000	14665	Huntingtin-interacting protein K OS=Homo sapiens OX=9606 GN=HYPK PE=1 SV=2
Q9UBQ5	13	3	3		833160	1633600	1553700	3016900	83300000	4070000	25060	Eukaryotic translation initiation factor 3 subunit K OS=Homo sapiens OX=9606 GN=EIF3K PE=1 SV=1
Q86TU7	11	5	5		1189600	0	2246000	4502600	3120000	948000	67257	Actin-histidine N-methyltransferase OS=Homo sapiens OX=9606 GN=SETD3 PE=1 SV=1
Q6PKG0	43	28	28	Carbamidomethylation; Acetylation (Protein N-term)	71602000	10472000	70104000	107450000	276000000	184000000	123510	La-related protein 1 OS=Homo sapiens OX=9606 GN=LARP1 PE=1 SV=2
Q9UGP8	21	10	10		699680	0	13006000	10206000	129000000	11700000	87997	Translocation protein SEC63 homolog OS=Homo sapiens OX=9606 GN=SEC63 PE=1 SV=2
Q9BZE1	22	7	7		0	0	10857000	6227200	30700000	143000	48118	39S ribosomal protein L37 mitochondrial OS=Homo sapiens OX=9606 GN=MRPL37 PE=1 SV=2
Q96IX5	28	2	2		949750	1362000	5825300	7734000	12200000	1780000	6458	ATP synthase membrane subunit K mitochondrial OS=Homo sapiens OX=9606 GN=ATP5MK PE=1 SV=1
Q9P0I2	29	5	5		0	5130200	7921000	1685700	5810000	113000	29952	ER membrane protein complex subunit 3 OS=Homo sapiens OX=9606 GN=EMC3 PE=1 SV=3
Q14684	48	21	21	Carbamidomethylation	729640	2188200	12789000	26224000	120000000	10800000	84428	Ribosomal RNA processing protein 1 homolog B OS=Homo sapiens OX=9606 GN=RRP1B PE=1 SV=3
P28838	23	8	8	Carbamidomethylation	466230	3899500	16235000	8849000	4140000	705000	56166	Cytosol aminopeptidase OS=Homo sapiens OX=9606 GN=LAP3 PE=1 SV=3
P49674	16	5	5		873690	1384100	3349000	9744600	8840000	433000	47315	Casein kinase I isoform epsilon OS=Homo sapiens OX=9606 GN=CSNK1E PE=1 SV=1
Q14966	4	4	4		0	1205300	1835100	3921400	56900000	4070000	220623	Zinc finger protein 638 OS=Homo sapiens OX=9606 GN=ZNF638 PE=1 SV=2
Q9BQ52	24	12	12	Oxidation (M)	168010	103920	9589700	10961000	212000000	11300000	92219	Zinc phosphodiesterase ELAC protein 2 OS=Homo sapiens OX=9606 GN=ELAC2 PE=1 SV=2
P46937	33	8	8		4578500	1859900	9732900	13721000	33700000	336000	54462	Transcriptional coactivator YAP1 OS=Homo sapiens OX=9606 GN=YAP1 PE=1 SV=2
O14907	31	2	2		345740	450740	11406000	16610000	32300000	5360000	13735	Tax1-binding protein 3 OS=Homo sapiens OX=9606 GN=TAX1BP3 PE=1 SV=2
Q9BX40	21	3	3		1581200	6393400	1825600	6058200	1130000	38700	42071	Protein LSM14 homolog B OS=Homo sapiens OX=9606 GN=LSM14B PE=1 SV=1
Q96SK2	15	4	4		162170	484130	2952000	1973400	42500000	2850000	62922	Transmembrane protein 209 OS=Homo sapiens OX=9606 GN=TMEM209 PE=1 SV=2
Q96F86	12	4	4		811570	562970	1106000	6880600	6030000	427000	56078	Enhancer of mRNA-decapping protein 3 OS=Homo sapiens OX=9606 GN=EDC3 PE=1 SV=1
O75131	19	9	8	Carbamidomethylation	8389800	12003000	14068000	19113000	138000000	57600000	60131	Copine-3 OS=Homo sapiens OX=9606 GN=CPNE3 PE=1 SV=1
Q99961	25	7	7	Carbamidomethylation	1193600	2164800	6814100	15038000	42900000	62100000	41490	Endophilin-A2 OS=Homo sapiens OX=9606 GN=SH3GL1 PE=1 SV=1
O00541	27	11	11	Carbamidomethylation	0	3111800	10334000	19764000	178000000	11200000	68003	Pescadillo homolog OS=Homo sapiens OX=9606 GN=PES1 PE=1 SV=1
O95295	45	3	3	Acetylation (Protein N-term)	0	558150	1951900	4696800	9770000	137000	14874	SNARE-associated protein Snapin OS=Homo sapiens OX=9606 GN=SNAPIN PE=1 SV=1
P18858	18	10	10		7151800	13649000	8476500	10695000	0	1520000	101736	DNA ligase 1 OS=Homo sapiens OX=9606 GN=LIG1 PE=1 SV=1
P43686	43	13	13	Carbamidomethylation; Acetylation (Protein N-term)	3856300	3041800	8880200	19109000	160000000	6330000	47366	26S proteasome regulatory subunit 6B OS=Homo sapiens OX=9606 GN=PSMC4 PE=1 SV=2
Q9H9B4	52	12	12	Acetylation (Protein N-term)	1155200	1969000	12226000	23455000	130000000	5670000	35619	Sideroflexin-1 OS=Homo sapiens OX=9606 GN=SFXN1 PE=1 SV=4
Q12972	20	4	4		73518000	2814600	2883800	3653400	4470000	2770000	38479	Nuclear inhibitor of protein phosphatase 1 OS=Homo sapiens OX=9606 GN=PPP1R8 PE=1 SV=2
O95336	37	7	7		75235000	2076800	10785000	7514900	79300000	3630000	27547	6-phosphogluconolactonase OS=Homo sapiens OX=9606 GN=PGLS PE=1 SV=2
Q5VT79	8	3	3		0	954590	1544700	2537900	5610000	497000	36879	Annexin A8-like protein 1 OS=Homo sapiens OX=9606 GN=ANXA8L1 PE=2 SV=2
Q13162	49	15	11	Carbamidomethylation	0	5308600	4159200	9652500	69700000	175000000	30540	Peroxiredoxin-4 OS=Homo sapiens OX=9606 GN=PRDX4 PE=1 SV=1
P98179	55	7	7	Oxidation (M)	1565700	1577000	36088000	28350000	128000000	1820000	17170	RNA-binding protein 3 OS=Homo sapiens OX=9606 GN=RBM3 PE=1 SV=1
O95453	12	4	4	Carbamidomethylation	0	0	1541100	3243100	5100000	3040000	73451	Poly(A)-specific ribonuclease PARN OS=Homo sapiens OX=9606 GN=PARN PE=1 SV=1
Q16698	20	4	4		400980	2293300	907060	3762400	62600000	2100000	36068	2 4-dienoyl-CoA reductase [(3E)-enoyl-CoA-producing] mitochondrial OS=Homo sapiens OX=9606 GN=DECR1 PE=1 SV=1
P25685	15	5	5	Carbamidomethylation	894620	2025200	4767700	7920800	33300000	6140000	38044	DnaJ homolog subfamily B member 1 OS=Homo sapiens OX=9606 GN=DNAJB1 PE=1 SV=4
Q9BQC6	31	2	2		140200	1544700	12837000	25434000	65500000	0	12266	Ribosomal protein 63 mitochondrial OS=Homo sapiens OX=9606 GN=MRPL57 PE=1 SV=1
P28070	37	6	6		0	58699	6278100	4661700	44700000	1480000	29204	Proteasome subunit beta type-4 OS=Homo sapiens OX=9606 GN=PSMB4 PE=1 SV=4
Q92667	15	8	8	Carbamidomethylation	4948700	16905000	14825000	22501000	7800000	225000	97342	A-kinase anchor protein 1 mitochondrial OS=Homo sapiens OX=9606 GN=AKAP1 PE=1 SV=1
Q15125	12	2	2	Acetylation (Protein N-term)	98448	378200	2392700	4332800	29800000	2380000	26353	3-beta-hydroxysteroid-Delta(8) Delta(7)-isomerase OS=Homo sapiens OX=9606 GN=EBP PE=1 SV=3
Q9NYK5	14	4	4		258770	825850	3291200	6793000	36700000	4960000	38712	39S ribosomal protein L39 mitochondrial OS=Homo sapiens OX=9606 GN=MRPL39 PE=1 SV=3
Q9NTI5	13	12	12		736700	1256000	4669600	10538000	14100000	741000	164666	Sister chromatid cohesion protein PDS5 homolog B OS=Homo sapiens OX=9606 GN=PDS5B PE=1 SV=1
Q01581	12	3	3		7106700	8746200	15952000	13396000	33900000	986000	57294	Hydroxymethylglutaryl-CoA synthase cytoplasmic OS=Homo sapiens OX=9606 GN=HMGCS1 PE=1 SV=2
Q9Y3B9	5	1	1		0	0	2310800	4352000	953000	0	31484	RRP15-like protein OS=Homo sapiens OX=9606 GN=RRP15 PE=1 SV=2
P51151	29	4	3		0	0	783890	2416100	8570000	104000	22838	Ras-related protein Rab-9A OS=Homo sapiens OX=9606 GN=RAB9A PE=1 SV=1
Q8WXF1	13	3	3		0	0	1439300	1611300	18800000	671000	58744	Paraspeckle component 1 OS=Homo sapiens OX=9606 GN=PSPC1 PE=1 SV=1
Q9HCS7	13	7	7		1041500	16764000	28799000	4048400	12800000	2090000	100010	Pre-mRNA-splicing factor SYF1 OS=Homo sapiens OX=9606 GN=XAB2 PE=1 SV=2
O00244	50	3	3	Carbamidomethylation	0	0	4628900	6603000	0	0	7402	Copper transport protein ATOX1 OS=Homo sapiens OX=9606 GN=ATOX1 PE=1 SV=1
Q6YN16	34	11	11		184950	125370	2659300	3472300	41000000	1440000	45395	Hydroxysteroid dehydrogenase-like protein 2 OS=Homo sapiens OX=9606 GN=HSDL2 PE=1 SV=1
Q96DH6	20	5	5		17490	313000	4340100	8113400	51200000	5340000	35197	RNA-binding protein Musashi homolog 2 OS=Homo sapiens OX=9606 GN=MSI2 PE=1 SV=1
Q9H9T3	21	8	8		214710	1939600	4074300	6954100	10400000	603000	62259	Elongator complex protein 3 OS=Homo sapiens OX=9606 GN=ELP3 PE=1 SV=2
Q8N5A5	10	4	4		0	3285800	6440200	14999000	11500000	312000	57359	Zinc finger CCCH-type with G patch domain-containing protein OS=Homo sapiens OX=9606 GN=ZGPAT PE=1 SV=3
Q9NR31	53	8	5		0	711980	6647600	13032000	94000000	1180000	22367	GTP-binding protein SAR1a OS=Homo sapiens OX=9606 GN=SAR1A PE=1 SV=1
O94979	9	7	7	Carbamidomethylation	0	374650	5071600	6847700	132000000	4500000	133015	Protein transport protein Sec31A OS=Homo sapiens OX=9606 GN=SEC31A PE=1 SV=3
Q9H3K2	6	2	2		8133300	3500400	9999600	23441000	32600000	667000	37205	Growth hormone-inducible transmembrane protein OS=Homo sapiens OX=9606 GN=GHITM PE=1 SV=2
Q92621	14	23	23	Acetylation (Protein N-term)	320520	1978600	21468000	20649000	126000000	5540000	227919	Nuclear pore complex protein Nup205 OS=Homo sapiens OX=9606 GN=NUP205 PE=1 SV=3
Q9NRG9	45	14	14	Carbamidomethylation; Acetylation (Protein N-term)	151850000	58774000	79904000	111550000	72500000	36200000	59574	Aladin OS=Homo sapiens OX=9606 GN=AAAS PE=1 SV=1
Q8NFH4	21	5	5		0	0	2846400	5177500	36500000	2200000	36708	Nucleoporin Nup37 OS=Homo sapiens OX=9606 GN=NUP37 PE=1 SV=1
Q9NX05	4	3	3		0	0	751320	931620	3600000	0	120588	Constitutive coactivator of PPAR-gamma-like protein 2 OS=Homo sapiens OX=9606 GN=FAM120C PE=1 SV=3
Q9UJZ1	50	13	13		625690	337560	12871000	32158000	164000000	9340000	38534	Stomatin-like protein 2 mitochondrial OS=Homo sapiens OX=9606 GN=STOML2 PE=1 SV=1
O15446	29	6	6		2498300	490950	2888200	5496300	14100000	661000	54986	DNA-directed RNA polymerase I subunit RPA34 OS=Homo sapiens OX=9606 GN=POLR1G PE=1 SV=1
P25325	21	4	4		282640	4178000	2052200	1372400	9180000	5790000	33178	3-mercaptopyruvate sulfurtransferase OS=Homo sapiens OX=9606 GN=MPST PE=1 SV=3
Q13445	21	3	3		0	1052000	1097700	3769500	40700000	3200000	25206	Transmembrane emp24 domain-containing protein 1 OS=Homo sapiens OX=9606 GN=TMED1 PE=1 SV=1
Q15942	24	9	9	Carbamidomethylation; Acetylation (Protein N-term)	12346000	8034300	23397000	37542000	230000000	34600000	61277	Zyxin OS=Homo sapiens OX=9606 GN=ZYX PE=1 SV=1
Q13085	12	17	17	Carbamidomethylation; Acetylation (Protein N-term)	3205400	4501300	33323000	19153000	23300000	7150000	265551	Acetyl-CoA carboxylase 1 OS=Homo sapiens OX=9606 GN=ACACA PE=1 SV=2
P46379	18	10	10		835870	1066300	4734600	9415400	36100000	1680000	119409	Large proline-rich protein BAG6 OS=Homo sapiens OX=9606 GN=BAG6 PE=1 SV=2
Q9UL25	29	5	4		0	1001600	10406000	26457000	101000000	5200000	24348	Ras-related protein Rab-21 OS=Homo sapiens OX=9606 GN=RAB21 PE=1 SV=3
Q14376	10	2	2		0	0	1495100	5395700	70500000	2570000	38282	UDP-glucose 4-epimerase OS=Homo sapiens OX=9606 GN=GALE PE=1 SV=2
Q96EY4	23	4	4		814060	347210	5488600	11027000	41200000	8510000	23864	Translation machinery-associated protein 16 OS=Homo sapiens OX=9606 GN=TMA16 PE=1 SV=2
Q9UNQ2	23	5	5		1594200	225110	658150	4999500	18500000	75900	35236	Probable dimethyladenosine transferase OS=Homo sapiens OX=9606 GN=DIMT1 PE=1 SV=1
P54105	38	5	5		2216400	4194600	18017000	11172000	334000000	9210000	26215	Methylosome subunit pICln OS=Homo sapiens OX=9606 GN=CLNS1A PE=1 SV=1
P61513	21	3	3		1228900	427390	29068000	31635000	161000000	9960000	10275	60S ribosomal protein L37a OS=Homo sapiens OX=9606 GN=RPL37A PE=1 SV=2
O95926	28	4	4	Oxidation (M); Acetylation (Protein N-term)	0	0	2093000	3504800	125000	152000	28722	Pre-mRNA-splicing factor SYF2 OS=Homo sapiens OX=9606 GN=SYF2 PE=1 SV=1
Q6FI81	40	9	9	Carbamidomethylation	561790	2458500	8597700	17676000	47400000	3360000	33582	Anamorsin OS=Homo sapiens OX=9606 GN=CIAPIN1 PE=1 SV=2
Q14558	35	8	7	Carbamidomethylation	10691000	2047900	5715900	5765000	32400000	1060000	39394	Phosphoribosyl pyrophosphate synthase-associated protein 1 OS=Homo sapiens OX=9606 GN=PRPSAP1 PE=1 SV=2
Q4G176	17	5	5		0	0	765910	1034600	124000	4370	64130	Malonate--CoA ligase ACSF3 mitochondrial OS=Homo sapiens OX=9606 GN=ACSF3 PE=1 SV=3
Q9NUQ8	10	5	5		126710	757060	6691500	19504000	3910000	4070000	79745	ATP-binding cassette sub-family F member 3 OS=Homo sapiens OX=9606 GN=ABCF3 PE=1 SV=2
O15511	23	2	2		0	0	4624800	4423100	7070000	296000	16320	Actin-related protein 2/3 complex subunit 5 OS=Homo sapiens OX=9606 GN=ARPC5 PE=1 SV=3
Q93050	8	5	5		377340	937100	6753700	10967000	19300000	11300000	96413	V-type proton ATPase 116 kDa subunit a1 OS=Homo sapiens OX=9606 GN=ATP6V0A1 PE=1 SV=3
Q9Y6M7	7	4	4		0	0	470540	0	6480000	34900	136044	Sodium bicarbonate cotransporter 3 OS=Homo sapiens OX=9606 GN=SLC4A7 PE=1 SV=2
O95372	26	3	3	Carbamidomethylation; Acetylation (Protein N-term)	482350	59577	3210200	5377000	31900000	517000	24737	Acyl-protein thioesterase 2 OS=Homo sapiens OX=9606 GN=LYPLA2 PE=1 SV=1
P07099	16	4	4		25110	0	222970	0	17000000	3040000	52949	Epoxide hydrolase 1 OS=Homo sapiens OX=9606 GN=EPHX1 PE=1 SV=1
Q9NP66	19	3	3		0	34039	622470	488080	7780000	772000	40144	High mobility group protein 20A OS=Homo sapiens OX=9606 GN=HMG20A PE=1 SV=1
Q9Y4C8	10	6	6		240440	1438700	19522000	15373000	18900000	27800	107332	Probable RNA-binding protein 19 OS=Homo sapiens OX=9606 GN=RBM19 PE=1 SV=3
P08574	26	6	6		0	388590	1893800	6038200	23800000	807000	35422	Cytochrome c1 heme protein mitochondrial OS=Homo sapiens OX=9606 GN=CYC1 PE=1 SV=3
P17568	20	3	3		659200	1701700	11842000	11631000	3420000	484000	16402	NADH dehydrogenase [ubiquinone] 1 beta subcomplex subunit 7 OS=Homo sapiens OX=9606 GN=NDUFB7 PE=1 SV=4
Q9P0M9	28	3	3		0	2172000	4159400	5526700	15300000	511000	16073	39S ribosomal protein L27 mitochondrial OS=Homo sapiens OX=9606 GN=MRPL27 PE=1 SV=1
Q15024	15	3	3		0	0	1890800	4100700	12100000	1850000	31821	Exosome complex component RRP42 OS=Homo sapiens OX=9606 GN=EXOSC7 PE=1 SV=3
O75909	10	3	3		311170	3781200	7676600	9139400	9930000	613000	64240	Cyclin-K OS=Homo sapiens OX=9606 GN=CCNK PE=1 SV=2
Q9BYJ9	24	6	4		0	2610900	949630	3878500	8010000	384000	60874	YTH domain-containing family protein 1 OS=Homo sapiens OX=9606 GN=YTHDF1 PE=1 SV=1
P13807	9	5	5		99562	0	607470	1615300	15700000	2530000	83786	Glycogen [starch] synthase muscle OS=Homo sapiens OX=9606 GN=GYS1 PE=1 SV=2
P49327	54	112	112	Carbamidomethylation; Oxidation (M); Acetylation (Protein N-term)	56456000	109940000	455420000	787240000	3860000000	659000000	273424	Fatty acid synthase OS=Homo sapiens OX=9606 GN=FASN PE=1 SV=3
P62136	38	11	3	Acetylation (Protein N-term)	838520	2719200	9851500	12486000	48500000	2690000	37512	Serine/threonine-protein phosphatase PP1-alpha catalytic subunit OS=Homo sapiens OX=9606 GN=PPP1CA PE=1 SV=1
Q6PL18	15	11	11		255460	645310	4855300	7626700	33400000	9730000	158554	ATPase family AAA domain-containing protein 2 OS=Homo sapiens OX=9606 GN=ATAD2 PE=1 SV=1
P33176	30	18	18	Carbamidomethylation	4000900	3317700	31826000	22188000	137000000	25300000	109685	Kinesin-1 heavy chain OS=Homo sapiens OX=9606 GN=KIF5B PE=1 SV=1
Q9UH65	7	2	2		0	0	2984700	4412800	3100000	262000	68998	Switch-associated protein 70 OS=Homo sapiens OX=9606 GN=SWAP70 PE=1 SV=1
Q6NUM9	13	5	5		0	179620	5865800	12019000	1620000	167000	66820	All-trans-retinol 13 14-reductase OS=Homo sapiens OX=9606 GN=RETSAT PE=1 SV=2
Q14254	39	12	12		3599600	15421000	52470000	62281000	234000000	2050000	47064	Flotillin-2 OS=Homo sapiens OX=9606 GN=FLOT2 PE=1 SV=2
Q8N7H5	33	11	11	Oxidation (M)	42198	94070	945820	8988600	39100000	2910000	59976	RNA polymerase II-associated factor 1 homolog OS=Homo sapiens OX=9606 GN=PAF1 PE=1 SV=2
Q02809	40	19	19		38172	2843400	14283000	40588000	93300000	7070000	83550	Procollagen-lysine 2-oxoglutarate 5-dioxygenase 1 OS=Homo sapiens OX=9606 GN=PLOD1 PE=1 SV=2
Q9Y696	59	11	10	Carbamidomethylation; Acetylation (Protein N-term)	3473900	2321900	11054000	14660000	35200000	820000	28772	Chloride intracellular channel protein 4 OS=Homo sapiens OX=9606 GN=CLIC4 PE=1 SV=4
Q9NQW6	7	4	4	Carbamidomethylation	78849	2209300	501310	2406600	14700000	347000	124199	Anillin OS=Homo sapiens OX=9606 GN=ANLN PE=1 SV=2
Q99653	23	3	3		0	0	419280	1479400	28000000	834000	22456	Calcineurin B homologous protein 1 OS=Homo sapiens OX=9606 GN=CHP1 PE=1 SV=3
P52434	39	5	5	Acetylation (Protein N-term)	1227200	0	2370500	8279500	38500000	6740000	17143	DNA-directed RNA polymerases I II and III subunit RPABC3 OS=Homo sapiens OX=9606 GN=POLR2H PE=1 SV=4
Q15019	58	18	17	Carbamidomethylation; Acetylation (Protein N-term)	94126000	127490000	100210000	78549000	272000000	27500000	41487	Septin-2 OS=Homo sapiens OX=9606 GN=SEPTIN2 PE=1 SV=1
Q9NQ50	37	5	5		0	0	1753000	4469800	36500000	417000	24490	39S ribosomal protein L40 mitochondrial OS=Homo sapiens OX=9606 GN=MRPL40 PE=1 SV=1
P06756	11	7	7		416440	209200	2748400	4828500	20100000	109000	116038	Integrin alpha-V OS=Homo sapiens OX=9606 GN=ITGAV PE=1 SV=2
Q13564	19	6	6		0	761820	4765600	9787400	55900000	1120000	60246	NEDD8-activating enzyme E1 regulatory subunit OS=Homo sapiens OX=9606 GN=NAE1 PE=1 SV=1
Q9P265	5	5	5		50043	762470	1719300	3280900	24400000	21700000	171491	Disco-interacting protein 2 homolog B OS=Homo sapiens OX=9606 GN=DIP2B PE=1 SV=3
Q9BSD7	42	5	5	Carbamidomethylation	177210	495800	15558000	5077000	9260000	1830000	20713	Cancer-related nucleoside-triphosphatase OS=Homo sapiens OX=9606 GN=NTPCR PE=1 SV=1
O60884	44	11	11	Carbamidomethylation	0	111430	5303000	15281000	78600000	3750000	45746	DnaJ homolog subfamily A member 2 OS=Homo sapiens OX=9606 GN=DNAJA2 PE=1 SV=1
Q9Y4W6	14	6	6		0	0	2089400	3250400	1790000	252000	88584	AFG3-like protein 2 OS=Homo sapiens OX=9606 GN=AFG3L2 PE=1 SV=2
Q04206	11	4	4		1270000	2387500	2909800	3803800	8990000	638000	60219	Transcription factor p65 OS=Homo sapiens OX=9606 GN=RELA PE=1 SV=2
Q99956	36	9	9	Carbamidomethylation	20385	0	13974000	8732500	808000	0	41868	Dual specificity protein phosphatase 9 OS=Homo sapiens OX=9606 GN=DUSP9 PE=1 SV=1
Q7Z7H5	26	3	3		0	43234	6221300	6504900	7950000	219000	25943	Transmembrane emp24 domain-containing protein 4 OS=Homo sapiens OX=9606 GN=TMED4 PE=1 SV=1
Q9Y2P8	10	3	3		2981100	2336600	6675400	5885100	14300000	274000	40843	RNA 3'-terminal phosphate cyclase-like protein OS=Homo sapiens OX=9606 GN=RCL1 PE=1 SV=3
Q9BY43	14	2	2		0	0	2472100	7448600	21300000	1130000	25098	Charged multivesicular body protein 4a OS=Homo sapiens OX=9606 GN=CHMP4A PE=1 SV=3
Q13126	31	5	5		47393	33193	10037000	8905600	62200000	19200000	31236	S-methyl-5'-thioadenosine phosphorylase OS=Homo sapiens OX=9606 GN=MTAP PE=1 SV=2
P49756	29	17	17	Carbamidomethylation	1716800	2617000	16218000	50816000	110000000	6750000	100186	RNA-binding protein 25 OS=Homo sapiens OX=9606 GN=RBM25 PE=1 SV=3
P21912	32	8	8		0	3213400	28689000	57800000	81600000	9630000	31630	Succinate dehydrogenase [ubiquinone] iron-sulfur subunit mitochondrial OS=Homo sapiens OX=9606 GN=SDHB PE=1 SV=3
Q9UKK9	19	5	5	Acetylation (Protein N-term)	2358000	1210200	8987400	24241000	8720000	794000	24328	ADP-sugar pyrophosphatase OS=Homo sapiens OX=9606 GN=NUDT5 PE=1 SV=1
P34896	17	5	4		0	47580	11976000	2932800	13000000	1850000	53083	Serine hydroxymethyltransferase cytosolic OS=Homo sapiens OX=9606 GN=SHMT1 PE=1 SV=1
P51809	32	5	5		183910	3234200	10906000	12427000	23800000	1930000	24935	Vesicle-associated membrane protein 7 OS=Homo sapiens OX=9606 GN=VAMP7 PE=1 SV=3
P19623	23	6	6	Acetylation (Protein N-term)	764160	3991700	7963500	18659000	101000000	20400000	33825	Spermidine synthase OS=Homo sapiens OX=9606 GN=SRM PE=1 SV=1
Q9BUR5	26	3	3		0	93163	2338400	4021400	17000000	2310000	22285	MICOS complex subunit MIC26 OS=Homo sapiens OX=9606 GN=APOO PE=1 SV=1
Q9Y2Q9	53	8	8		1950800	6784000	2664800	7323500	29500000	803000	20843	28S ribosomal protein S28 mitochondrial OS=Homo sapiens OX=9606 GN=MRPS28 PE=1 SV=1
Q9C0C9	19	10	10	Carbamidomethylation; Acetylation (Protein N-term)	6325900	449610	3459400	9641100	3640000	204000	141293	(E3-independent) E2 ubiquitin-conjugating enzyme OS=Homo sapiens OX=9606 GN=UBE2O PE=1 SV=3
Q9P0V9	10	3	3		38819	155690	1275300	2785900	56000000	3750000	52593	Septin-10 OS=Homo sapiens OX=9606 GN=SEPTIN10 PE=1 SV=2
Q8TCJ2	15	9	9		659680	1667400	11991000	6319900	49600000	49600000	93674	Dolichyl-diphosphooligosaccharide--protein glycosyltransferase subunit STT3B OS=Homo sapiens OX=9606 GN=STT3B PE=1 SV=1
Q8N884	15	5	5		0	0	2801100	7716800	4230000	431000	58815	Cyclic GMP-AMP synthase OS=Homo sapiens OX=9606 GN=CGAS PE=1 SV=2
Q9NWT1	12	3	3		0	4912500	32557000	9189400	6890000	611000	43964	p21-activated protein kinase-interacting protein 1 OS=Homo sapiens OX=9606 GN=PAK1IP1 PE=1 SV=2
Q13724	36	19	19		1573600	4660200	25090000	33807000	117000000	14900000	91918	Mannosyl-oligosaccharide glucosidase OS=Homo sapiens OX=9606 GN=MOGS PE=1 SV=5
O14908	22	4	4		0	16881000	5850500	8053700	19300000	724000	36049	PDZ domain-containing protein GIPC1 OS=Homo sapiens OX=9606 GN=GIPC1 PE=1 SV=2
P49750	9	9	9		1359000	3029900	4561400	12012000	19900000	335000	241643	YLP motif-containing protein 1 OS=Homo sapiens OX=9606 GN=YLPM1 PE=1 SV=4
O60610	16	15	15	Carbamidomethylation	97768	376820	9537300	18884000	60300000	2300000	141347	Protein diaphanous homolog 1 OS=Homo sapiens OX=9606 GN=DIAPH1 PE=1 SV=2
P30566	32	11	11	Acetylation (Protein N-term)	0	42658	30003000	22536000	93700000	1800000	54889	Adenylosuccinate lyase OS=Homo sapiens OX=9606 GN=ADSL PE=1 SV=2
Q9Y639	7	2	2		0	379190	16390000	6275500	19700000	732000	44387	Neuroplastin OS=Homo sapiens OX=9606 GN=NPTN PE=1 SV=2
P15291	27	6	6		0	632440	9085500	16738000	89600000	1210000	43920	Beta-1 4-galactosyltransferase 1 OS=Homo sapiens OX=9606 GN=B4GALT1 PE=1 SV=5
Q8WUD4	27	2	2		56640	0	2078100	3437700	821000	193000	19181	Coiled-coil domain-containing protein 12 OS=Homo sapiens OX=9606 GN=CCDC12 PE=1 SV=1
O95104	7	4	3		0	764500	3348800	6202600	6990000	0	125869	SR-related and CTD-associated factor 4 OS=Homo sapiens OX=9606 GN=SCAF4 PE=1 SV=3
P11234	43	6	2		0	0	254340	2297300	11000000	1140000	23409	Ras-related protein Ral-B OS=Homo sapiens OX=9606 GN=RALB PE=1 SV=1
O94925	32	13	13		130490	652300	21743000	30795000	75300000	1110000	73461	Glutaminase kidney isoform mitochondrial OS=Homo sapiens OX=9606 GN=GLS PE=1 SV=1
O95168	18	2	2		314190	1332300	2825300	6347900	2640000	307000	15209	NADH dehydrogenase [ubiquinone] 1 beta subcomplex subunit 4 OS=Homo sapiens OX=9606 GN=NDUFB4 PE=1 SV=3
Q6WKZ4	11	8	8		0	937240	6918400	7844200	13000000	23200000	137167	Rab11 family-interacting protein 1 OS=Homo sapiens OX=9606 GN=RAB11FIP1 PE=1 SV=3
Q8IVS2	26	6	6		0	0	1466500	3379100	20700000	297000	42962	Malonyl-CoA-acyl carrier protein transacylase mitochondrial OS=Homo sapiens OX=9606 GN=MCAT PE=1 SV=2
Q9H7Z7	42	10	10		591030	1756100	13412000	21615000	91300000	2330000	41943	Prostaglandin E synthase 2 OS=Homo sapiens OX=9606 GN=PTGES2 PE=1 SV=1
P04632	50	8	8	Oxidation (M)	1227100	4288400	4162800	8621200	206000000	30500000	28316	Calpain small subunit 1 OS=Homo sapiens OX=9606 GN=CAPNS1 PE=1 SV=1
Q15363	31	5	5	Oxidation (M)	0	0	271150	4033800	64400000	2470000	22761	Transmembrane emp24 domain-containing protein 2 OS=Homo sapiens OX=9606 GN=TMED2 PE=1 SV=1
P35269	22	10	10	Acetylation (Protein N-term)	1177100	1430200	2691100	4406300	30500000	6820000	58241	General transcription factor IIF subunit 1 OS=Homo sapiens OX=9606 GN=GTF2F1 PE=1 SV=2
Q68EM7	19	7	7	Carbamidomethylation	8278400	2582600	3229600	12875000	19600000	5910000	95437	Rho GTPase-activating protein 17 OS=Homo sapiens OX=9606 GN=ARHGAP17 PE=1 SV=1
Q8NEB9	6	3	3		0	0	1177700	1259600	0	0	101549	Phosphatidylinositol 3-kinase catalytic subunit type 3 OS=Homo sapiens OX=9606 GN=PIK3C3 PE=1 SV=1
P13674	44	14	14		876810	27167000	21427000	22475000	77600000	3810000	61049	Prolyl 4-hydroxylase subunit alpha-1 OS=Homo sapiens OX=9606 GN=P4HA1 PE=1 SV=2
Q96P70	16	11	11	Carbamidomethylation; Acetylation (Protein N-term)	1865700	1465100	20207000	27027000	105000000	134000000	115963	Importin-9 OS=Homo sapiens OX=9606 GN=IPO9 PE=1 SV=3
P47755	35	6	4	Acetylation (Protein N-term)	0	0	4706100	5721200	69100000	4910000	32949	F-actin-capping protein subunit alpha-2 OS=Homo sapiens OX=9606 GN=CAPZA2 PE=1 SV=3
Q16836	55	9	9		1808100	0	2161400	11582000	115000000	56300000	34294	Hydroxyacyl-coenzyme A dehydrogenase mitochondrial OS=Homo sapiens OX=9606 GN=HADH PE=1 SV=3
Q16531	15	10	10		150420	620420	9207900	12417000	155000000	11800000	126968	DNA damage-binding protein 1 OS=Homo sapiens OX=9606 GN=DDB1 PE=1 SV=1
P04920	20	14	14		1369300	1741300	11033000	30757000	58100000	7830000	137009	Anion exchange protein 2 OS=Homo sapiens OX=9606 GN=SLC4A2 PE=1 SV=4
Q8WUM0	22	16	16		148070	621380	49880000	46978000	56500000	12400000	128979	Nuclear pore complex protein Nup133 OS=Homo sapiens OX=9606 GN=NUP133 PE=1 SV=2
P12694	22	5	5		0	361380	12287000	8344400	18800000	1590000	50471	2-oxoisovalerate dehydrogenase subunit alpha mitochondrial OS=Homo sapiens OX=9606 GN=BCKDHA PE=1 SV=2
Q6P1J9	18	7	7		15762000	66668000	917630	4600000	26200000	566000	60577	Parafibromin OS=Homo sapiens OX=9606 GN=CDC73 PE=1 SV=1
Q9BTC0	13	13	13	Carbamidomethylation	3681700	1689900	4610200	9128400	16000000	21600000	243870	Death-inducer obliterator 1 OS=Homo sapiens OX=9606 GN=DIDO1 PE=1 SV=5
Q7L576	5	6	6		25688	2029000	3694100	3978900	45200000	1910000	145182	Cytoplasmic FMR1-interacting protein 1 OS=Homo sapiens OX=9606 GN=CYFIP1 PE=1 SV=1
P23786	16	7	7		0	1750200	3382100	4132800	48900000	4400000	73777	Carnitine O-palmitoyltransferase 2 mitochondrial OS=Homo sapiens OX=9606 GN=CPT2 PE=1 SV=2
P61764	13	5	5		0	9408200	12813000	5095000	10900000	191000000	67569	Syntaxin-binding protein 1 OS=Homo sapiens OX=9606 GN=STXBP1 PE=1 SV=1
P42771	62	7	7	Carbamidomethylation; Acetylation (Protein N-term)	2382100	3483000	17367000	28316000	149000000	6290000	16533	Cyclin-dependent kinase inhibitor 2A OS=Homo sapiens OX=9606 GN=CDKN2A PE=1 SV=2
Q92947	21	5	5		845110	617860	1444900	3352800	5800000	149000	48127	Glutaryl-CoA dehydrogenase mitochondrial OS=Homo sapiens OX=9606 GN=GCDH PE=1 SV=1
Q8NBQ5	16	3	3		0	0	81318	768570	98700	0	32936	Estradiol 17-beta-dehydrogenase 11 OS=Homo sapiens OX=9606 GN=HSD17B11 PE=1 SV=3
Q7Z2K6	14	8	8		23383	2029300	10132000	7112200	49800000	28900000	100231	Endoplasmic reticulum metallopeptidase 1 OS=Homo sapiens OX=9606 GN=ERMP1 PE=1 SV=2
O43491	8	4	4		350280	0	3824500	6891500	11400000	252000	112588	Band 4.1-like protein 2 OS=Homo sapiens OX=9606 GN=EPB41L2 PE=1 SV=1
Q9Y3I1	6	2	2		0	0	1059700	1978400	1440000	0	58503	F-box only protein 7 OS=Homo sapiens OX=9606 GN=FBXO7 PE=1 SV=1
Q9ULC4	35	4	4		1193800	0	3186400	3331900	87300000	12100000	20555	Malignant T-cell-amplified sequence 1 OS=Homo sapiens OX=9606 GN=MCTS1 PE=1 SV=1
Q9Y6I3	19	4	4		227670	182270	2867400	3126300	935000	127000	60293	Epsin-1 OS=Homo sapiens OX=9606 GN=EPN1 PE=1 SV=2
Q9H4A6	35	8	8		1197800	433150	17352000	7712900	49100000	2050000	33811	Golgi phosphoprotein 3 OS=Homo sapiens OX=9606 GN=GOLPH3 PE=1 SV=1
Q9BTU6	18	4	4		0	0	12198000	8377200	4120000	60600	54022	Phosphatidylinositol 4-kinase type 2-alpha OS=Homo sapiens OX=9606 GN=PI4K2A PE=1 SV=1
P06396	9	4	4		3088400	405200	6200900	6928800	49100000	5730000	85697	Gelsolin OS=Homo sapiens OX=9606 GN=GSN PE=1 SV=1
Q86TS9	42	3	3		1825100	0	955820	159320	33600000	3370000	13664	39S ribosomal protein L52 mitochondrial OS=Homo sapiens OX=9606 GN=MRPL52 PE=1 SV=2
O00560	39	7	7	Acetylation (Protein N-term)	0	26060	2709100	6257200	22900000	2600000	32444	Syntenin-1 OS=Homo sapiens OX=9606 GN=SDCBP PE=1 SV=1
P40616	17	2	2		0	0	1083300	2758700	41900000	30000000	20418	ADP-ribosylation factor-like protein 1 OS=Homo sapiens OX=9606 GN=ARL1 PE=1 SV=1
Q9BZX2	35	5	5	Acetylation (Protein N-term)	0	463660	3010900	5488900	46600000	28900000	29299	Uridine-cytidine kinase 2 OS=Homo sapiens OX=9606 GN=UCK2 PE=1 SV=1
O60934	12	4	4		0	1495600	5531300	2396000	0	223000	84959	Nibrin OS=Homo sapiens OX=9606 GN=NBN PE=1 SV=1
Q9BPX3	11	5	5	Carbamidomethylation	0	93397	2604300	5918800	26700000	1510000	114334	Condensin complex subunit 3 OS=Homo sapiens OX=9606 GN=NCAPG PE=1 SV=1
Q9Y697	36	10	10		0	951500	6332300	13043000	29300000	4150000	50196	Cysteine desulfurase mitochondrial OS=Homo sapiens OX=9606 GN=NFS1 PE=1 SV=3
Q9Y3D3	28	3	3		152140	0	412660	2109800	0	0	15345	28S ribosomal protein S16 mitochondrial OS=Homo sapiens OX=9606 GN=MRPS16 PE=1 SV=1
Q9BXJ9	17	13	13		586810	1670800	3514400	10574000	134000000	197000000	101272	N-alpha-acetyltransferase 15 NatA auxiliary subunit OS=Homo sapiens OX=9606 GN=NAA15 PE=1 SV=1
O14579	44	7	7	Oxidation (M)	77643	0	2530400	7388100	118000000	6510000	34482	Coatomer subunit epsilon OS=Homo sapiens OX=9606 GN=COPE PE=1 SV=3
Q9NPI6	19	5	5		0	0	986470	1723900	1980000	5670000	63279	mRNA-decapping enzyme 1A OS=Homo sapiens OX=9606 GN=DCP1A PE=1 SV=3
Q14573	8	11	11		5484400	0	11190000	9931100	17800000	3260000	304105	Inositol 1 4 5-trisphosphate receptor type 3 OS=Homo sapiens OX=9606 GN=ITPR3 PE=1 SV=2
Q9NTJ5	13	6	6		50228	406360	3019900	9835800	17600000	0	66967	Phosphatidylinositol-3-phosphatase SAC1 OS=Homo sapiens OX=9606 GN=SACM1L PE=1 SV=2
Q9UI12	12	3	3		150670	1386700	2839700	2864600	7390000	456000	55883	V-type proton ATPase subunit H OS=Homo sapiens OX=9606 GN=ATP6V1H PE=1 SV=1
P17655	25	9	9	Carbamidomethylation	0	70293	2755200	8271600	208000000	12700000	79995	Calpain-2 catalytic subunit OS=Homo sapiens OX=9606 GN=CAPN2 PE=1 SV=6
Q96S66	26	9	9		1254300	1590700	5185900	6512100	6280000	119000	62023	Chloride channel CLIC-like protein 1 OS=Homo sapiens OX=9606 GN=CLCC1 PE=1 SV=1
P48163	14	5	5	Carbamidomethylation	514740	133960	1464300	4663400	14200000	796000	64150	NADP-dependent malic enzyme OS=Homo sapiens OX=9606 GN=ME1 PE=1 SV=1
Q9H9L3	16	4	4	Acetylation (Protein N-term)	29636	27962	3950000	7697300	34900000	560000	39154	Interferon-stimulated 20 kDa exonuclease-like 2 OS=Homo sapiens OX=9606 GN=ISG20L2 PE=1 SV=1
P46060	44	20	20	Acetylation (Protein N-term)	5056400	4104200	29061000	45652000	149000000	11900000	63542	Ran GTPase-activating protein 1 OS=Homo sapiens OX=9606 GN=RANGAP1 PE=1 SV=1
Q9Y3D7	25	2	2		0	0	2306900	3977100	1090000	0	13825	Mitochondrial import inner membrane translocase subunit TIM16 OS=Homo sapiens OX=9606 GN=PAM16 PE=1 SV=2
O15226	14	6	6		0	188920	6042900	9527500	58500000	3400000	77673	NF-kappa-B-repressing factor OS=Homo sapiens OX=9606 GN=NKRF PE=1 SV=2
O00469	18	9	9		135720000	143120	3476200	9893700	174000000	315000000	84686	Procollagen-lysine 2-oxoglutarate 5-dioxygenase 2 OS=Homo sapiens OX=9606 GN=PLOD2 PE=1 SV=2
P15586	13	5	5		0	1148400	7426200	7915200	32000000	7040000	62082	N-acetylglucosamine-6-sulfatase OS=Homo sapiens OX=9606 GN=GNS PE=1 SV=3
Q99575	18	12	12	Carbamidomethylation	1294900	4289500	15108000	47649000	264000000	17300000	114709	Ribonucleases P/MRP protein subunit POP1 OS=Homo sapiens OX=9606 GN=POP1 PE=1 SV=2
Q8NBN7	29	6	6		10960000	0	40418000	5118300	41800000	3100000	35932	Retinol dehydrogenase 13 OS=Homo sapiens OX=9606 GN=RDH13 PE=1 SV=2
O96028	4	4	4		131310	0	5207800	7515500	12000000	679000	152258	Histone-lysine N-methyltransferase NSD2 OS=Homo sapiens OX=9606 GN=NSD2 PE=1 SV=1
P30533	13	4	4		591090	805170	5210600	4590900	26600000	0	41466	Alpha-2-macroglobulin receptor-associated protein OS=Homo sapiens OX=9606 GN=LRPAP1 PE=1 SV=1
P53367	15	3	3		686540	102900	1892300	2155300	996000	2250000	41738	Arfaptin-1 OS=Homo sapiens OX=9606 GN=ARFIP1 PE=1 SV=2
P38432	12	5	5		4474200	23983000	21197000	43874000	33900000	2850000	62608	Coilin OS=Homo sapiens OX=9606 GN=COIL PE=1 SV=1
Q04917	34	9	3		0	1402000	8211800	13025000	58500000	3790000	28219	14-3-3 protein eta OS=Homo sapiens OX=9606 GN=YWHAH PE=1 SV=4
P56182	29	10	10		9028700	6043600	12711000	19247000	69800000	11200000	52839	Ribosomal RNA processing protein 1 homolog A OS=Homo sapiens OX=9606 GN=RRP1 PE=1 SV=1
Q13541	58	7	7	Oxidation (M)	11407000	959350	34940000	61237000	22400000	4550000	12580	Eukaryotic translation initiation factor 4E-binding protein 1 OS=Homo sapiens OX=9606 GN=EIF4EBP1 PE=1 SV=3
Q9H7E9	24	3	3	Carbamidomethylation; Acetylation (Protein N-term)	5326700	3533400	7558200	12805000	5210000	187000	24992	UPF0488 protein C8orf33 OS=Homo sapiens OX=9606 GN=C8orf33 PE=1 SV=1
Q13330	11	6	5		0	0	1244400	2679900	8350000	313000	80786	Metastasis-associated protein MTA1 OS=Homo sapiens OX=9606 GN=MTA1 PE=1 SV=2
Q8N4V1	43	3	3		0	0	623680	906550	6440000	0	14686	ER membrane protein complex subunit 5 OS=Homo sapiens OX=9606 GN=MMGT1 PE=1 SV=1
O75436	24	5	5		0	0	1234300	2349400	46600000	3690000	38170	Vacuolar protein sorting-associated protein 26A OS=Homo sapiens OX=9606 GN=VPS26A PE=1 SV=2
P57088	23	5	5	Acetylation (Protein N-term)	1324900	0	921590	9563200	35100000	0	27978	Transmembrane protein 33 OS=Homo sapiens OX=9606 GN=TMEM33 PE=1 SV=2
Q9Y448	16	3	3		562760	67128	1279500	1742500	2970000	210000	35438	Small kinetochore-associated protein OS=Homo sapiens OX=9606 GN=KNSTRN PE=1 SV=2
Q9H9J2	21	7	7		0	0	2280300	4826800	52000000	872000	37535	39S ribosomal protein L44 mitochondrial OS=Homo sapiens OX=9606 GN=MRPL44 PE=1 SV=1
Q9Y678	15	8	7		0	756050	9404900	11124000	152000000	3870000	97718	Coatomer subunit gamma-1 OS=Homo sapiens OX=9606 GN=COPG1 PE=1 SV=1
Q6UVK1	15	18	18	Carbamidomethylation	1968800	3126500	23333000	23120000	38400000	7270000	250534	Chondroitin sulfate proteoglycan 4 OS=Homo sapiens OX=9606 GN=CSPG4 PE=1 SV=2
Q6L8Q7	10	3	3		0	0	1589500	3959200	25400000	1720000	67352	2' 5'-phosphodiesterase 12 OS=Homo sapiens OX=9606 GN=PDE12 PE=1 SV=2
Q53HL2	23	5	5		937410	4032600	3295800	2796800	30400000	394000	31323	Borealin OS=Homo sapiens OX=9606 GN=CDCA8 PE=1 SV=2
Q6P6C2	14	3	3		215340	538540	2094500	3976700	5080000	5450000	44256	RNA demethylase ALKBH5 OS=Homo sapiens OX=9606 GN=ALKBH5 PE=1 SV=2
P60660	59	8	7	Carbamidomethylation; Acetylation (Protein N-term)	50549000	12578000	45866000	126850000	585000000	34200000	16930	Myosin light polypeptide 6 OS=Homo sapiens OX=9606 GN=MYL6 PE=1 SV=2
Q15646	19	6	6	Acetylation (Protein N-term)	52005	5372900	2633800	8480800	909000	305000	59226	2'-5'-oligoadenylate synthase-like protein OS=Homo sapiens OX=9606 GN=OASL PE=1 SV=2
Q9H1I8	5	3	3		0	0	710920	1450300	17000000	46900	86360	Activating signal cointegrator 1 complex subunit 2 OS=Homo sapiens OX=9606 GN=ASCC2 PE=1 SV=3
O95793	17	6	6		0	268120	0	1368200	6770000	1130000	63182	Double-stranded RNA-binding protein Staufen homolog 1 OS=Homo sapiens OX=9606 GN=STAU1 PE=1 SV=2
Q969Z0	35	13	13		554780	1168600	4416700	9081900	36700000	1130000	70738	FAST kinase domain-containing protein 4 OS=Homo sapiens OX=9606 GN=TBRG4 PE=1 SV=1
Q01469	33	4	4	Carbamidomethylation; Acetylation (Protein N-term)	2630800	27707000	6388700	15666000	12700000	1890000	15164	Fatty acid-binding protein 5 OS=Homo sapiens OX=9606 GN=FABP5 PE=1 SV=3
P09622	24	9	9		346470	4709300	10256000	25377000	154000000	4240000	54177	Dihydrolipoyl dehydrogenase mitochondrial OS=Homo sapiens OX=9606 GN=DLD PE=1 SV=2
Q14232	25	5	5	Acetylation (Protein N-term)	335830	292300	3623100	8681400	25500000	577000	33712	Translation initiation factor eIF-2B subunit alpha OS=Homo sapiens OX=9606 GN=EIF2B1 PE=1 SV=1
P67870	27	3	3	Carbamidomethylation	48163	253160	2803200	4403800	40600000	3400000	24942	Casein kinase II subunit beta OS=Homo sapiens OX=9606 GN=CSNK2B PE=1 SV=1
P18615	37	9	9		3486100	1873400	4493500	9638600	31300000	910000	43240	Negative elongation factor E OS=Homo sapiens OX=9606 GN=NELFE PE=1 SV=3
Q13868	33	7	7	Oxidation (M)	216990	1471300	11608000	6785000	76400000	926000	32789	Exosome complex component RRP4 OS=Homo sapiens OX=9606 GN=EXOSC2 PE=1 SV=2
O95785	5	4	4		36594	2546000	2642000	2973900	11100000	3230000	178673	Protein Wiz OS=Homo sapiens OX=9606 GN=WIZ PE=1 SV=2
Q29RF7	21	17	17	Carbamidomethylation	3425900	5899300	5324000	19003000	58900000	8670000	150830	Sister chromatid cohesion protein PDS5 homolog A OS=Homo sapiens OX=9606 GN=PDS5A PE=1 SV=1
Q4KMP7	20	7	7	Acetylation (Protein N-term)	0	0	2311600	6583100	970000	447000	87199	TBC1 domain family member 10B OS=Homo sapiens OX=9606 GN=TBC1D10B PE=1 SV=3
Q8NF37	16	5	5		189240	1500300	1237900	1771000	146000000	4240000	59151	Lysophosphatidylcholine acyltransferase 1 OS=Homo sapiens OX=9606 GN=LPCAT1 PE=1 SV=2
Q9NYV4	7	5	4		0	0	1338200	712000	0	170000	164154	Cyclin-dependent kinase 12 OS=Homo sapiens OX=9606 GN=CDK12 PE=1 SV=2
Q9NRF8	18	7	4		446330	126370	3197800	7840500	1240000	3940000	65678	CTP synthase 2 OS=Homo sapiens OX=9606 GN=CTPS2 PE=1 SV=1
P13984	33	4	4	Acetylation (Protein N-term)	0	251300	4869400	4516100	7850000	0	28380	General transcription factor IIF subunit 2 OS=Homo sapiens OX=9606 GN=GTF2F2 PE=1 SV=2
P53350	16	5	5	Carbamidomethylation	686630	342660	1783600	2193400	9000000	721000	68255	Serine/threonine-protein kinase PLK1 OS=Homo sapiens OX=9606 GN=PLK1 PE=1 SV=1
Q00577	27	4	4		44243000	4734300	4891400	11821000	74500000	15700000	34911	Transcriptional activator protein Pur-alpha OS=Homo sapiens OX=9606 GN=PURA PE=1 SV=2
Q99460	26	14	14	Carbamidomethylation	0	128100	14769000	20528000	269000000	12200000	105836	26S proteasome non-ATPase regulatory subunit 1 OS=Homo sapiens OX=9606 GN=PSMD1 PE=1 SV=2
Q14789	2	3	3		0	2401600	309340	4961000	12600000	1150000	376019	Golgin subfamily B member 1 OS=Homo sapiens OX=9606 GN=GOLGB1 PE=1 SV=2
Q9BRX5	26	4	4		10545000	24202000	725620	5657500	996000	324000	24535	DNA replication complex GINS protein PSF3 OS=Homo sapiens OX=9606 GN=GINS3 PE=1 SV=1
Q9Y2H6	6	4	4	Carbamidomethylation	2082300	1626700	13747000	8675300	11800000	22000000	131852	Fibronectin type-III domain-containing protein 3A OS=Homo sapiens OX=9606 GN=FNDC3A PE=1 SV=4
P08758	62	19	19	Acetylation (Protein N-term)	5040800	6078700	17783000	34718000	335000000	79400000	35937	Annexin A5 OS=Homo sapiens OX=9606 GN=ANXA5 PE=1 SV=2
Q9UBM7	6	2	2		12026000	2612800	12631000	32903000	114000000	1390000	54489	7-dehydrocholesterol reductase OS=Homo sapiens OX=9606 GN=DHCR7 PE=1 SV=1
Q9NVP2	24	3	3		6771200	15807000	3064200	4230800	12000000	52200	22434	Histone chaperone ASF1B OS=Homo sapiens OX=9606 GN=ASF1B PE=1 SV=1
O43493	10	3	3		2009500	4726100	1467700	7781200	9320000	1660000	45880	Trans-Golgi network integral membrane protein 2 OS=Homo sapiens OX=9606 GN=TGOLN2 PE=1 SV=4
O14773	13	4	4		0	1635800	242540	2083200	31200000	237000	61248	Tripeptidyl-peptidase 1 OS=Homo sapiens OX=9606 GN=TPP1 PE=1 SV=2
Q15392	14	6	6		800600	603160	7027200	19068000	39900000	609000	60101	Delta(24)-sterol reductase OS=Homo sapiens OX=9606 GN=DHCR24 PE=1 SV=2
Q687X5	13	3	3		296480	0	641980	1649800	1090000	4520000	51981	Metalloreductase STEAP4 OS=Homo sapiens OX=9606 GN=STEAP4 PE=1 SV=1
Q15008	18	5	5		166140	508910	3594800	6366200	91500000	4130000	45531	26S proteasome non-ATPase regulatory subunit 6 OS=Homo sapiens OX=9606 GN=PSMD6 PE=1 SV=1
Q04760	26	3	3		565050	0	0	5443600	69800000	2840000	20778	Lactoylglutathione lyase OS=Homo sapiens OX=9606 GN=GLO1 PE=1 SV=4
P06737	17	9	8		988520	1925100	5174100	5729900	10500000	244000	97149	Glycogen phosphorylase liver form OS=Homo sapiens OX=9606 GN=PYGL PE=1 SV=4
Q14141	21	9	8		721280	12225000	13105000	20498000	6110000	67000000	49717	Septin-6 OS=Homo sapiens OX=9606 GN=SEPTIN6 PE=1 SV=4
Q9Y305	20	7	7		3107200	1506800	2794800	7885700	33800000	2130000	49902	Acyl-coenzyme A thioesterase 9 mitochondrial OS=Homo sapiens OX=9606 GN=ACOT9 PE=1 SV=2
Q9NX14	35	3	3		0	889580	789240	1925300	13000000	1170000	17317	NADH dehydrogenase [ubiquinone] 1 beta subcomplex subunit 11 mitochondrial OS=Homo sapiens OX=9606 GN=NDUFB11 PE=1 SV=1
P49257	33	8	8	Oxidation (M)	2414100	0	4401400	28281000	50400000	5950000	57549	Protein ERGIC-53 OS=Homo sapiens OX=9606 GN=LMAN1 PE=1 SV=2
Q92615	14	6	6		0	0	455390	5160300	17200000	656000	80552	La-related protein 4B OS=Homo sapiens OX=9606 GN=LARP4B PE=1 SV=3
Q96ER9	27	6	6		0	0	1299900	11071000	7400000	1000000	45811	Mitochondrial potassium channel OS=Homo sapiens OX=9606 GN=CCDC51 PE=1 SV=2
P09601	28	5	5	Acetylation (Protein N-term)	1245800	39410	12131000	14621000	84300000	16500000	32819	Heme oxygenase 1 OS=Homo sapiens OX=9606 GN=HMOX1 PE=1 SV=1
Q68E01	6	9	9	Acetylation (Protein N-term)	110750	5170400	4302500	6442100	267000000	24000000	118070	Integrator complex subunit 3 OS=Homo sapiens OX=9606 GN=INTS3 PE=1 SV=1
Q9H0V9	18	3	3		0	0	3432700	5249600	48000000	0	39711	VIP36-like protein OS=Homo sapiens OX=9606 GN=LMAN2L PE=1 SV=1
P40937	34	8	8	Carbamidomethylation; Acetylation (Protein N-term)	3042400	0	4028700	3995700	40800000	5770000	38497	Replication factor C subunit 5 OS=Homo sapiens OX=9606 GN=RFC5 PE=1 SV=1
P53701	44	8	8	Carbamidomethylation	172920	1351200	9916500	15951000	36300000	4340000	30602	Holocytochrome c-type synthase OS=Homo sapiens OX=9606 GN=HCCS PE=1 SV=1
Q4G0J3	21	8	8		665030	1849400	2125500	17396000	13800000	5780000	66899	La-related protein 7 OS=Homo sapiens OX=9606 GN=LARP7 PE=1 SV=1
L0R6Q1	41	3	3	Acetylation (Protein N-term)	0	0	1661800	3202400	20900000	9800000	11133	SLC35A4 upstream open reading frame protein OS=Homo sapiens OX=9606 GN=SLC35A4 PE=3 SV=1
Q8NHQ9	30	9	9	Acetylation (Protein N-term)	124940	58857	17649000	21210000	139000000	810000	68547	ATP-dependent RNA helicase DDX55 OS=Homo sapiens OX=9606 GN=DDX55 PE=1 SV=3
P11169	10	3	3		611860	130610	5073900	987860	29900000	0	53924	Solute carrier family 2 facilitated glucose transporter member 3 OS=Homo sapiens OX=9606 GN=SLC2A3 PE=1 SV=1
O43583	27	3	3	Carbamidomethylation; Acetylation (Protein N-term)	1029000	752850	1410600	6615700	33800000	20100000	22092	Density-regulated protein OS=Homo sapiens OX=9606 GN=DENR PE=1 SV=2
Q9Y314	27	6	6		38022	0	6214500	3334800	10500000	1570000	33172	Nitric oxide synthase-interacting protein OS=Homo sapiens OX=9606 GN=NOSIP PE=1 SV=1
O43598	20	2	2		620200	317180	8218800	14190000	24900000	1330000	19108	2'-deoxynucleoside 5'-phosphate N-hydrolase 1 OS=Homo sapiens OX=9606 GN=DNPH1 PE=1 SV=1
Q14257	27	4	4		80371	0	11169000	15076000	937000	255000	36876	Reticulocalbin-2 OS=Homo sapiens OX=9606 GN=RCN2 PE=1 SV=1
P42566	6	3	3		0	0	0	1750600	0	0	98656	Epidermal growth factor receptor substrate 15 OS=Homo sapiens OX=9606 GN=EPS15 PE=1 SV=2
Q9Y399	23	4	4		0	0	2456400	3025000	1550000	0	33249	28S ribosomal protein S2 mitochondrial OS=Homo sapiens OX=9606 GN=MRPS2 PE=1 SV=1
Q9UBV2	7	3	3		0	0	157800	2400000	15200000	785000	88755	Protein sel-1 homolog 1 OS=Homo sapiens OX=9606 GN=SEL1L PE=1 SV=3
O95983	21	6	6		635000	0	950280	1083900	7750000	82400	32844	Methyl-CpG-binding domain protein 3 OS=Homo sapiens OX=9606 GN=MBD3 PE=1 SV=1
O60749	10	4	3		101030	110800	1769100	2413800	14000000	511000	58471	Sorting nexin-2 OS=Homo sapiens OX=9606 GN=SNX2 PE=1 SV=2
Q7L0Y3	36	9	9	Carbamidomethylation	421360	1106600	8627200	11375000	48800000	2170000	47347	tRNA methyltransferase 10 homolog C OS=Homo sapiens OX=9606 GN=TRMT10C PE=1 SV=2
Q96ST2	7	4	4		1655600	1030600	2584300	702280	14300000	115000	91955	Protein IWS1 homolog OS=Homo sapiens OX=9606 GN=IWS1 PE=1 SV=2
O95602	12	10	10		2291300	70995	6924400	12613000	72600000	2520000	194810	DNA-directed RNA polymerase I subunit RPA1 OS=Homo sapiens OX=9606 GN=POLR1A PE=1 SV=2
Q9UBE0	23	5	5	Carbamidomethylation	70804	1664000	10092000	15226000	43300000	9580000	38450	SUMO-activating enzyme subunit 1 OS=Homo sapiens OX=9606 GN=SAE1 PE=1 SV=1
Q0VDF9	19	5	5		1425300	401590	1688100	1651600	15700000	30300	54795	Heat shock 70 kDa protein 14 OS=Homo sapiens OX=9606 GN=HSPA14 PE=1 SV=1
Q9NRX2	32	5	5		99133	305720	3221700	11520000	17100000	0	20050	39S ribosomal protein L17 mitochondrial OS=Homo sapiens OX=9606 GN=MRPL17 PE=1 SV=1
Q9BRP8	70	10	10	Acetylation (Protein N-term)	416540	3908000	13523000	14864000	174000000	24400000	22656	Partner of Y14 and mago OS=Homo sapiens OX=9606 GN=PYM1 PE=1 SV=1
P82970	29	9	9	Oxidation (M)	8168200	16113000	45559000	65732000	2400000	8710000	31525	High mobility group nucleosome-binding domain-containing protein 5 OS=Homo sapiens OX=9606 GN=HMGN5 PE=1 SV=1
O75964	39	4	4		0	0	56054	2150800	11300000	598000	11428	ATP synthase subunit g mitochondrial OS=Homo sapiens OX=9606 GN=ATP5MG PE=1 SV=3
Q9H0A0	35	31	31		28368000	64787000	108670000	124640000	339000000	14000000	115730	RNA cytidine acetyltransferase OS=Homo sapiens OX=9606 GN=NAT10 PE=1 SV=2
Q9UHI6	15	6	6	Acetylation (Protein N-term)	282830	2166700	6192800	3641400	9980000	1330000	92241	Probable ATP-dependent RNA helicase DDX20 OS=Homo sapiens OX=9606 GN=DDX20 PE=1 SV=2
Q99567	25	10	10	Carbamidomethylation; Acetylation (Protein N-term)	210560	1477100	6064100	14010000	21800000	1560000	83542	Nuclear pore complex protein Nup88 OS=Homo sapiens OX=9606 GN=NUP88 PE=1 SV=2
O15260	16	3	3		0	0	0	520890	25200000	584000	30394	Surfeit locus protein 4 OS=Homo sapiens OX=9606 GN=SURF4 PE=1 SV=3
Q8WY22	17	3	3		0	64129	2777500	6182700	13900000	226000	27836	BRI3-binding protein OS=Homo sapiens OX=9606 GN=BRI3BP PE=1 SV=1
Q9H2W6	35	7	7		0	0	4428300	2006100	32700000	9380000	31705	39S ribosomal protein L46 mitochondrial OS=Homo sapiens OX=9606 GN=MRPL46 PE=1 SV=1
O75494	24	7	7		208680	1495300	14602000	53332000	464000000	15100000	31301	Serine/arginine-rich splicing factor 10 OS=Homo sapiens OX=9606 GN=SRSF10 PE=1 SV=1
Q07157	5	5	5		0	0	242530	2204600	467000	1120	195457	Tight junction protein ZO-1 OS=Homo sapiens OX=9606 GN=TJP1 PE=1 SV=3
P07951	36	18	4	Oxidation (M)	2361900	3939900	4245600	9374100	17400000	627000	32851	Tropomyosin beta chain OS=Homo sapiens OX=9606 GN=TPM2 PE=1 SV=1
P13693	47	4	4		62827	2879300	4531800	15523000	511000000	18100000	19595	Translationally-controlled tumor protein OS=Homo sapiens OX=9606 GN=TPT1 PE=1 SV=1
P50552	11	3	3		0	0	0	4319100	49200000	3740000	39830	Vasodilator-stimulated phosphoprotein OS=Homo sapiens OX=9606 GN=VASP PE=1 SV=3
Q96CW5	9	5	5		189590	42193	1136900	2423200	17700000	1000000	103571	Gamma-tubulin complex component 3 OS=Homo sapiens OX=9606 GN=TUBGCP3 PE=1 SV=2
P08237	24	16	14	Carbamidomethylation	1396800	3326500	23497000	40768000	253000000	10800000	85183	ATP-dependent 6-phosphofructokinase muscle type OS=Homo sapiens OX=9606 GN=PFKM PE=1 SV=2
O60271	12	8	8		6541700	23062000	8126100	7911500	17000000	3460000	146205	C-Jun-amino-terminal kinase-interacting protein 4 OS=Homo sapiens OX=9606 GN=SPAG9 PE=1 SV=4
P10412	42	40	10	Acetylation (Protein N-term)	718190000	643610000	348090000	391920000	478000000	30200000	21865	Histone H1.4 OS=Homo sapiens OX=9606 GN=H1-4 PE=1 SV=2
Q8NHH9	17	6	6	Carbamidomethylation	0	0	570910	1842100	56000000	243000	66229	Atlastin-2 OS=Homo sapiens OX=9606 GN=ATL2 PE=1 SV=2
Q14344	21	7	7		1488300	1590000	4826300	11875000	32700000	2430000	44050	Guanine nucleotide-binding protein subunit alpha-13 OS=Homo sapiens OX=9606 GN=GNA13 PE=1 SV=2
O00178	19	6	6		0	173030	158730	1258800	24000000	0	72454	GTP-binding protein 1 OS=Homo sapiens OX=9606 GN=GTPBP1 PE=1 SV=3
Q9H4L4	9	3	3		0	0	1582800	3632900	1950000	5430000	65010	Sentrin-specific protease 3 OS=Homo sapiens OX=9606 GN=SENP3 PE=1 SV=2
Q5SRE5	5	6	6		322270	426010	933230	6736700	18500000	781000	196041	Nucleoporin NUP188 OS=Homo sapiens OX=9606 GN=NUP188 PE=1 SV=1
O60763	25	14	14	Carbamidomethylation	1637300	1765500	13517000	19871000	113000000	5650000	107895	General vesicular transport factor p115 OS=Homo sapiens OX=9606 GN=USO1 PE=1 SV=2
Q96A35	23	3	3		0	0	1116600	56356000	1310000	0	24915	39S ribosomal protein L24 mitochondrial OS=Homo sapiens OX=9606 GN=MRPL24 PE=1 SV=1
Q03468	6	5	5	Carbamidomethylation	0	187110	11970000	7401300	7210000	1140000	168415	DNA excision repair protein ERCC-6 OS=Homo sapiens OX=9606 GN=ERCC6 PE=1 SV=1
O15164	8	3	3		0	0	2960600	2891900	6130000	0	116831	Transcription intermediary factor 1-alpha OS=Homo sapiens OX=9606 GN=TRIM24 PE=1 SV=3
P46977	10	7	7		4106800	4890000	2090700	1600300	12900000	1010000	80530	Dolichyl-diphosphooligosaccharide--protein glycosyltransferase subunit STT3A OS=Homo sapiens OX=9606 GN=STT3A PE=1 SV=2
Q14562	13	9	9	Acetylation (Protein N-term)	1272900	1104200	6306700	12347000	45900000	2640000	139314	ATP-dependent RNA helicase DHX8 OS=Homo sapiens OX=9606 GN=DHX8 PE=1 SV=1
Q8IZ83	15	6	6		0	0	6200800	8538300	1820000	16100000	85127	Aldehyde dehydrogenase family 16 member A1 OS=Homo sapiens OX=9606 GN=ALDH16A1 PE=1 SV=2
Q9UKX7	39	11	11	Carbamidomethylation	5176200	17296000	18378000	25265000	46200000	258000000	50144	Nuclear pore complex protein Nup50 OS=Homo sapiens OX=9606 GN=NUP50 PE=1 SV=2
Q9Y6M5	27	9	9	Carbamidomethylation	2957900	4795500	26088000	31417000	9380000	3120000	55300	Zinc transporter 1 OS=Homo sapiens OX=9606 GN=SLC30A1 PE=1 SV=3
Q15067	22	9	9		183460	0	10044000	4582000	78600000	9150000	74424	Peroxisomal acyl-coenzyme A oxidase 1 OS=Homo sapiens OX=9606 GN=ACOX1 PE=1 SV=3
Q96HC4	16	5	5	Carbamidomethylation; Acetylation (Protein N-term)	0	1501600	3838600	7586500	49600000	2230000	63945	PDZ and LIM domain protein 5 OS=Homo sapiens OX=9606 GN=PDLIM5 PE=1 SV=5
O75616	17	5	5		542700	0	3681200	6807700	42000000	854000	48350	GTPase Era mitochondrial OS=Homo sapiens OX=9606 GN=ERAL1 PE=1 SV=2
Q96QD8	8	3	3		26932	0	2147100	2515900	14900000	16200000	56026	Sodium-coupled neutral amino acid transporter 2 OS=Homo sapiens OX=9606 GN=SLC38A2 PE=1 SV=2
Q6DD88	41	16	16	Acetylation (Protein N-term)	2183100	17091000	47201000	33601000	150000000	7550000	60542	Atlastin-3 OS=Homo sapiens OX=9606 GN=ATL3 PE=1 SV=1
Q8N3U4	13	9	8		0	0	727270	4145300	6190000	350000	141326	Cohesin subunit SA-2 OS=Homo sapiens OX=9606 GN=STAG2 PE=1 SV=3
Q13523	13	12	12	Carbamidomethylation	687710	1367800	8424400	16070000	43700000	10100000	116987	Serine/threonine-protein kinase PRP4 homolog OS=Homo sapiens OX=9606 GN=PRPF4B PE=1 SV=3
O60927	52	3	3	Acetylation (Protein N-term)	6406800	2266100	7384100	16875000	9090000	280000	13952	E3 ubiquitin-protein ligase PPP1R11 OS=Homo sapiens OX=9606 GN=PPP1R11 PE=1 SV=1
Q1ED39	32	11	11		10180000	35195000	10193000	63061000	97100000	6130000	51589	Lysine-rich nucleolar protein 1 OS=Homo sapiens OX=9606 GN=KNOP1 PE=1 SV=1
P52943	25	3	3		986780	558980	10945000	12420000	50900000	410000	22493	Cysteine-rich protein 2 OS=Homo sapiens OX=9606 GN=CRIP2 PE=1 SV=1
Q9HA77	15	5	5		0	256060	9394400	18538000	70800000	3850000	62224	Probable cysteine--tRNA ligase mitochondrial OS=Homo sapiens OX=9606 GN=CARS2 PE=1 SV=1
Q9H8H2	15	9	9		0	264190	740060	3983500	122000000	4250000	94087	Probable ATP-dependent RNA helicase DDX31 OS=Homo sapiens OX=9606 GN=DDX31 PE=1 SV=2
Q96JJ7	14	3	3		0	0	8238200	6700600	123000000	8110000	51872	Protein disulfide-isomerase TMX3 OS=Homo sapiens OX=9606 GN=TMX3 PE=1 SV=2
Q9Y320	14	2	2		0	0	440120	857310	0	0	34038	Thioredoxin-related transmembrane protein 2 OS=Homo sapiens OX=9606 GN=TMX2 PE=1 SV=1
O43837	21	4	4		0	0	14991000	4308900	6580000	0	42184	Isocitrate dehydrogenase [NAD] subunit beta mitochondrial OS=Homo sapiens OX=9606 GN=IDH3B PE=1 SV=2
Q13405	30	4	4		0	0	975100	3649000	5930000	206000	19198	39S ribosomal protein L49 mitochondrial OS=Homo sapiens OX=9606 GN=MRPL49 PE=1 SV=1
Q9Y2T2	20	4	4		146090	0	727350	1934900	19400000	639000	46939	AP-3 complex subunit mu-1 OS=Homo sapiens OX=9606 GN=AP3M1 PE=1 SV=1
Q9NP72	28	5	4	Acetylation (Protein N-term)	1265900	2344400	5048000	9670700	18800000	115000	22977	Ras-related protein Rab-18 OS=Homo sapiens OX=9606 GN=RAB18 PE=1 SV=1
P33240	30	9	5	Acetylation (Protein N-term)	2053700	2337300	14358000	19441000	14400000	845000	60959	Cleavage stimulation factor subunit 2 OS=Homo sapiens OX=9606 GN=CSTF2 PE=1 SV=1
O75569	23	5	5		71787	0	1686000	5817300	18000000	652000	34404	Interferon-inducible double-stranded RNA-dependent protein kinase activator A OS=Homo sapiens OX=9606 GN=PRKRA PE=1 SV=1
Q14108	23	6	6		0	0	1759100	5059800	69900000	5160000	54290	Lysosome membrane protein 2 OS=Homo sapiens OX=9606 GN=SCARB2 PE=1 SV=2
P49005	13	4	4		20767000	725430	2898200	5889600	2350000	71700	51290	DNA polymerase delta subunit 2 OS=Homo sapiens OX=9606 GN=POLD2 PE=1 SV=1
Q9NSI2	21	4	4		28485	99478	1469400	1676000	0	371000	25456	Protein FAM207A OS=Homo sapiens OX=9606 GN=FAM207A PE=1 SV=2
Q9UBQ0	20	2	2		0	0	2437900	4087600	61700000	1550000	20506	Vacuolar protein sorting-associated protein 29 OS=Homo sapiens OX=9606 GN=VPS29 PE=1 SV=1
Q10567	13	10	4		1047200	1208200	1550300	4175800	36200000	1780000	104637	AP-1 complex subunit beta-1 OS=Homo sapiens OX=9606 GN=AP1B1 PE=1 SV=2
O60508	13	4	4		139200	1113900	5511800	8354500	1510000	0	65521	Pre-mRNA-processing factor 17 OS=Homo sapiens OX=9606 GN=CDC40 PE=1 SV=1
P10253	9	4	4		0	0	1589400	3823800	4700000	0	105324	Lysosomal alpha-glucosidase OS=Homo sapiens OX=9606 GN=GAA PE=1 SV=4
Q9HD45	12	3	3		0	0	2408100	0	2280000	0	67888	Transmembrane 9 superfamily member 3 OS=Homo sapiens OX=9606 GN=TM9SF3 PE=1 SV=2
Q5JSH3	8	4	4		5194200	3781900	3933000	5590900	26000000	1610000	101366	WD repeat-containing protein 44 OS=Homo sapiens OX=9606 GN=WDR44 PE=1 SV=1
P49006	32	3	3		4050100	489190	804370	5298500	35500000	1480000	19529	MARCKS-related protein OS=Homo sapiens OX=9606 GN=MARCKSL1 PE=1 SV=2
Q9UL03	6	3	3		0	570340	418520	10025000	4120000	0	100390	Integrator complex subunit 6 OS=Homo sapiens OX=9606 GN=INTS6 PE=1 SV=1
O15533	17	4	4		0	535340	1647500	4417800	27400000	2560000	47626	Tapasin OS=Homo sapiens OX=9606 GN=TAPBP PE=1 SV=1
O00165	29	3	3		371300	98301	841670	1987200	1380000	86800	31621	HCLS1-associated protein X-1 OS=Homo sapiens OX=9606 GN=HAX1 PE=1 SV=2
O60885	8	6	5		0	449160	1145300	3154400	3490000	20300	152218	Bromodomain-containing protein 4 OS=Homo sapiens OX=9606 GN=BRD4 PE=1 SV=2
P33527	5	4	4		0	0	1161900	2072500	16600000	278000	171590	Multidrug resistance-associated protein 1 OS=Homo sapiens OX=9606 GN=ABCC1 PE=1 SV=3
Q6UXN9	11	3	3		0	0	2608900	7041600	13200000	3510000	35079	WD repeat-containing protein 82 OS=Homo sapiens OX=9606 GN=WDR82 PE=1 SV=1
[truncated: 1,827 more rows]

## Sheet: 1000cells-peptide(ratio)
Peptide	Avg. ppm	Avg. Area	Sample 1	Sample 2	Sample 3	Sample 4	Sample 5	Sample 6	Max Ratio	#Vector	Accession
IGGIGTVPVGR	1.2	955640000	1614900000	1044100000	721240000	83610000	1616300000	117630000	19.31	1	P68104
VAPEEHPVLLTEAPLNPK	2.2	4025200000	6871400000	4420500000	2937400000	580940000	353340000	769350000	11.83	3	P60709
ASGPPVSELITK	1.3	639970000	672150000	373480000	287670000	84024000	12233000000	84421000	21.21	1	P10412
AGFAGDDAPR	0.9	393670000	319250000	178370000	138760000	50633000	5975900	73720000	25.31	1	P60709
SYELPDGQVITIGNER	1.3	1803900000	3040900000	2163200000	263300000	163670000	14312000	320310000	20.7	2	P60709
SGWNGDNMLEPSANMPWFK	1	5328500	4265800	22377000	0	0	78826000	0	64	2	P68104
S(+42.01)DKPDMAEIEKFDK	1	709750000	1156000000	1269500000	563170000	154650000	3410600000	0	8.21	2	P62328
S(+42.01)ETAPAAPAAAPPAEKAPVK	1	215450000	147560000	239670000	243520000	73476000	302840000	0	5.08	2	P16403
IGYNPDTVAFVPISG	0.7	12208000	31671000	9949900	16173000	3246200	3182700000	186050	64	1	P68104
APIIAVTR	1.2	102100000	207280000	127280000	72140000	9413700	1845600000	26218000	22.02	1	P14618
GQLEALQVDGGRLEAELR	6.6	451280000	1073800000	690170000	379720000	79705000	1991500000	0	32.5	1	P08729
DSYVGDEAQSKR	1	201220000	291490000	198480000	162450000	24490000	81131000	336250	13.44	2	P60709
QTVAVGVIK	1	129720000	153160000	92820000	29156000	9655000	22938000	259560	37.68	1	P68104
GGNFGFGDSR	1	157580000	71843000	47711000	45136000	20515000	25343000	11868000	29.38	1	P22626
SQYEVMAEQNR	6.2	79355000	160910000	103660000	92462000	13050000	128830000	460030	12.33	1	P08727
A(+42.01)DKPDMGEIASFDK	0.5	598600000	1247500000	1208700000	196050000	52069000	6336900000	112470000	23.96	2	P63313
EITALAPSTMK	1.4	491130000	539610000	256610000	58582000	7038500	1748500000	223820000	64	1	P60709
KASGPPVSELITK	0.9	814510000	521760000	468630000	272540000	79737000	140810000	0	34.24	2	P10412
NFGIGQDIQPK	0.8	164410000	86485000	64252000	52952000	28401000	8096700	13722000	20.77	1	P62424
DGQVINETSQHHDDLE	1.1	170170000	154880000	99275000	97562000	41433000	253190000	29229000	11.05	2	P08670
M(+42.01)NDTVTIR	1.2	31690000	33930000	36077000	27530000	19392000	67381000	4577700	2.14	1	P62847
ALAAAGYDVEKNNSR	0.8	214670000	33025000	99500000	220830000	53851000	24410000	0	20.17	2	P10412
A(+42.01)SGVAVSDGVIK	1.1	111070000	226020000	155270000	32443000	8166100	20715000	41637000	27.68	1	P23528
DGNASGTTLLEAL	0.4	4547500	1732900	16285000	2936900	1782600	862020000	0	64	1	P68104
ISSSSFSR	1.3	98712000	3009400	5158600	0	0	3354900	6758800	64	1	P05787
AVTEQGHELSNEER	1.1	38120000	80600000	46718000	24456000	0	390130000	8481400	64	2	P31946
VTILELFR	4.2	45786000	77034000	31011000	69414000	27736000	250760000	0	3.25	1	P11166
QVHPDTGISSK	1.4	1591000000	978410000	138220000	20528000	0	15364000	173470000	64	2	Q99879
TNQELQEINR	1.2	129460000	21196000	7614600	41808000	25224000	21726000	37936000	64	1	P07355
SEC(+57.02)LNNIGDSSPLIR	0.3	1627000	5912500	2222500	0	0	20463000	0	64	1	Q92973
LSLEGDHSTPPSAYGSVK	1.3	314030000	227630000	184720000	89852000	19093000	27108000	25233000	54.93	2	P07355
VITIMQNPR	7	102170000	57067000	39268000	34961000	5799600	380680000	6585000	64	1	P62269
TPVSITEHPK	1.5	7587400	6978800	5951000	8109000	11947000	140410000	868480	2.41	1	Q14204
S(+42.01)DAAVDTSSEITTK	0.8	243500000	309930000	470260000	189060000	119370000	107110000	105880	3.94	1	P06454
LATQSNEITIPVTFESR	1	109410000	63826000	40412000	8948300	10454000	1161800000	7184400	47.32	2	P04792
LVLVGDGGTGK	1.1	34381000	24467000	13786000	9021600	14562000	10077000	9201100	12.2	1	P62826
AQGPAASAEEPKPVEAPAANSDQTVTVKE	0.6	283370000	187930000	165840000	110580000	77503000	1826700000	0	11.29	2	P80723
VGIDIFTGK	0.7	31273000	89355000	53600000	11505000	1906400	150030000	0	64	1	P63241
IIIFVPVPQLK	0.3	1302700	4073400	2303500	136390	0	147120000	0	64	1	P62081
YEELQSLAGK	1.1	283230000	172080000	83731000	13455000	0	173790000	0	64	1	P05787
IEEELGSK	6.5	52678000	60737000	45029000	20531000	31692000	14142000	37348000	5.13	1	P06733
SSASAPDVDDPEAFPALA	1.2	43236000	72241000	39848000	11303000	6832400	55466000	2470100	12.58	1	Q8NC51
VNVTTEVK	1.3	26419000	75568000	25446000	22140000	2783800	740550000	5372600	27.15	1	P68104
KKEAGGGGVGGPGAK	0.8	77576000	47090000	35704000	23457000	22417000	9116000	0	11.56	1	Q8NC51
TIGISVDPR	1.5	79554000	37488000	24322000	14209000	6066000	7922100	828960	52.04	1	P26373
AVDSQILPK	1.4	87505000	68290000	37135000	22329000	33814000	42044000	0	12.36	1	Q02878
IMNTFSVVPSPK	1.4	413640000	156070000	95159000	31840000	3088400	283430000	2660300	64	1	P07437
YDGIILPGK	1.1	100190000	79668000	61128000	17705000	9757400	37552000	11553000	34.1	1	P62913
ILLAELEQLKGQGK	1.1	180410000	120030000	84892000	37488000	20199000	8236700	0	31.66	2	P08670
SVGGSGGGSFGDNLVTR	1	36058000	30063000	26347000	23233000	19797000	73946000	10484000	4.08	1	P02545
LVSESSDVLPK	0.9	302720000	135120000	80766000	34592000	12580000	168880000	15799000	64	1	P05787
ETPAATEAPSSTPK	1.1	109290000	66606000	36963000	17565000	2639100	30938000	11139000	64	1	P80723
S(+42.01)TVHEILC(+57.02)K	2.2	74386000	145340000	84709000	71711000	55380000	332140000	1210700	9.83	1	P07355
NMGGPYGGGNYGP	0.5	9297600	15356000	9287600	10885000	10960000	15317000	0	64	1	P22626
SLTSWTNDQGAR	5.6	25313000	35460000	33442000	26236000	14139000	896150000	3868000	2.51	1	Q7Z2W4
TKVENGEGTIPVESSDIVPTWDGIR	1.5	8532000	8711300	6649900	0	0	27969000	0	64	1	P55265
GLYDGPVC(+57.02)EVSVTPK	0.5	6228500	13347000	10259000	4401300	3135100	13482000	232490	64	1	Q16555
AVFPSIVGR	2.3	31937000	48033000	9162100	0	0	8195100	97843000	64	1	P60709
KADIDLTK	1	38373000	67712000	28027000	9044900	0	87013000	3454900	64	1	P62269
NGFVVLK	1.1	49166000	94721000	64513000	22286000	4864000	25242000	12692000	19.47	1	P63241
QLIVGVNK	1	169910000	384690000	157510000	47283000	47274000	222460000	25692000	8.14	1	P68104
EQVANSAFVER	0.7	86874000	181330000	102230000	11700000	0	180400000	9355500	64	1	P08238
KLEKEEEEGISQESSEEEQ	0.9	45576000	23563000	20439000	20094000	26835000	31755000	78888	6.82	2	P17096
TIEKFEK	4.6	31261000	28080000	54276000	57436000	10279000	148960000	465430	9.22	1	P68104
T(+42.01)ENSTSAPAAKPK	0.8	9822500	8032700	3781400	3022400	1531900	119130000	19178	21.38	1	P07305
S(+42.01)DKPDMAEIEK	0.9	67740000	175050000	92479000	26620000	6712000	37093000	72626000	26.08	1	P62328
TATESFASDPILYRPVAVALDTKGPEIR	1.5	104230000	38420000	217560000	19283000	31314000	34863000	0	11.28	2	P14618
SSGPTSLFAVTVAPPGAR	1.1	220040000	165040000	88408000	34054000	28083000	287220000	10034000	27.94	2	Q00839
ELGTVMR	5.9	49448000	81085000	68638000	21211000	0	1307600000	0	64	1	P0DP24
PAPPKAEAK	0.6	3518800	2116200	1154500	1587600	0	11663000	231400	64	1	P62750
HPQPFLR	0.6	30924000	28080000	54276000	57436000	10279000	94790000	873500	12.62	1	P07814
EAPAPPKAEAK	0.7	37568000	16962000	13435000	19614000	16719000	99914000	2110000	9.01	2	P62750
AVFPSIVGRPR	1.4	575640000	485340000	398000000	214470000	79156000	26884000	1133500	21.49	2	P60709
SESVPPVTDWAWYK	1.3	97644000	12509000	4030300	0	0	105920000	5688300	64	1	P35613
QEYDESGPSIVHR	1	322360000	958630000	247270000	47520000	14255000	27176000	248010000	64	2	P60709
GGGVTNLLWSPDGSK	5.4	71198000	82777000	64406000	51270000	140290000	24939000	0	8.13	1	Q9NRG9
STTTGHLIYK	1.2	248350000	351630000	216480000	119090000	21803000	9969100	43898000	24.44	2	P68104
GSGTAEVELKK	1.1	75014000	161050000	92210000	58954000	1812100	12236000	892310	64	2	P14618
SPSLLQSGAK	1.2	11157000	7770000	6639700	13348000	2093700	71821000	11529000	12.39	1	Q9BQG0
S(+42.01)ETAPAAPAAAPPAEKAPVKK	0.9	130790000	64781000	108850000	204330000	207170000	122230000	0	3.2	2	P16403
GMGTVEGGDQSNPK	2.6	12358000	2420500	25258000	21357000	3183800	6196400	584280	10.44	1	Q13428
EVSTYIKK	1.2	38160000	30096000	16165000	5857100	0	325850000	477420	64	1	P68104
ALTQTGGPHVK	4.1	15439000	16962000	13435000	19614000	16719000	4493100000	2485500	1.87	2	P21333
SASPEVSEGHENQHGQESEAK	5.9	13695000	17390000	15554000	14507000	20712000	114410000	78888	64	1	O60930
VAAPDVVVPTLDTVR	1.3	6146800	6933800	3990500	0	0	521440000	389740	64	1	Q14204
TVIEPMASEGLR	4.4	43113000	58402000	59591000	54985000	23197000	5545000	3335000	3.07	1	P20020
GAVEKGEELSC(+57.02)EER	1	14616000	28554000	24444000	20084000	0	66033000	129740	64	2	P31947
GYSFTTTAER	1.2	278910000	106120000	33790000	14143000	0	24806000	79499000	64	1	P60709
FANYIDK	2.9	23624000	4954000	5158600	0	0	1715800	6758800	64	1	P08670
A(+42.01)AQGEPQVQFK	3	59817000	138990000	71543000	47558000	8549700	47550000	26965000	16.26	1	P62826
DEILPTTPISEQK	1.5	87827000	159730000	111470000	13411000	1542600	339810000	24030000	64	1	P23396
GDLGIEIPAEK	1.6	173560000	389160000	264210000	95363000	6112100	92230000	41473000	63.67	1	P14618
A(+42.01)TAEVLNIGKK	1.4	62434000	63936000	69779000	69463000	73375000	14864000	2930600	2.06	1	P22234
AASITSEVFNK	0.8	53100000	131470000	73125000	12758000	3053200	7629900	2531700	43.06	1	Q9Y5B9
GPSSVEDIK	1.4	247190000	133770000	70852000	12813000	0	11259000	33241000	64	1	P06748
HQGVMVGMGQK	1.3	331350000	405290000	234390000	126080000	13731000	358570000	129370000	63.89	2	P60709
VINGNPITIFQER	0.9	7886400	29976000	9455600	0	0	6432900	9281600	64	1	P04406
ALEEVPIHIEDPPFPSLR	0.5	316270	1122100	459230	0	0	72790000	0	64	1	Q5VZK9
MPSLEISAPK	0.6	37236000	65669000	66084000	37897000	6590200	130980000	925550	10.03	1	Q09666
VFIGNLNTLVVK	1.5	135670000	15070000	5290100	0	0	39670000	2135100	64	1	P07910
PEPSKSAPAPK	4.7	6830600	6978800	5951000	8109000	11947000	233810000	828660	10.24	1
IGHPAPNFK	1.4	133570000	252070000	165930000	124310000	15525000	5920800	16600000	16.24	2	Q06830
YPIEHGIITNWDDMEK	1.1	1264900000	2471500000	1559000000	690570	0	65342000	397730000	64	2	P68032
VGINYQPPTVVPGGDLAK	1.2	775880000	878410000	452560000	139370000	18923000	178760000	161480000	64	2	Q9BQE3
MVGDVTGAQAYASTAK	2.5	24737000	44231000	52430000	7341700	3762800	966660000	428940	13.93	1	Q01628
LLEGEEER	1.2	30957000	29248000	13977000	6168100	0	897150000	10448000	64	1	P02545
FAAATGATPIAGR	1.1	75674000	74093000	44451000	24656000	2747100	29426000	16695000	64	1	P08865
GADFLVTEVENGGSLGSK	0.7	150390000	454150000	193520000	19285000	12545000	21512000	45504000	36.2	2	P14618
SGDAAIVDMVPGKPM	0.6	74448000	86769000	67641000	53746000	147230000	209430000	28957000	8.73	2	P68104
VYNVTQHAVGIVVNK	1.1	163150000	115440000	92566000	35520000	6234800	24854000	0	64	2	P46778
FESPEVAER	3.6	46860000	127940000	35823000	0	0	1147200	5698600	64	1	P52272
M(+42.01)MC(+57.02)GAPSATQPATAETQHIADQVR	0.8	15638000	46371000	25780000	0	6040900	24467000	0	64	2	P04080
VLEQLTGQTPVFSK	1.3	168200000	130030000	74315000	40322000	11645000	600570000	17571000	50.21	2	P62913
AMAAVPQDVVR	4.5	31968000	24608000	10277000	64426000	53560000	71186000	130590	9.25	1	Q969V3
QASPNIVIALAGNK	1.5	16684000	9846200	4237400	0	0	18033000	97989	64	1	P51148
YGVSGYPTLK	2	30536000	13168000	9980700	4925400	46446000	19108000	1008100	15.87	1	P30101
EVQTNDLKEVVNK	1.1	94955000	15083000	27348000	48580000	14710000	154640000	0	25.09	2	P61247
PAAPAAAPPAEKAPVK	0.9	12051000	9962300	18312000	20894000	5906700	31943000	0	4.03	1	P16403
IASPEGQDYLK	13.1	17339000	16797000	16093000	12754000	9727800	187850000	5871200	3.22	1	Q9Y3I0
KVPQVSTPTLVEVSR	0.7	98620000	177160000	229980000	50138000	27531000	49598000	28132000	27.74	2	P02768
VKAFLADPSAFVAAAPVAAATTAAPAAAAAPAKVEAK	0.4	587820	971070	1968000	0	0	3576100	0	64	1	P05388
HPEQLITGK	0.3	30541000	103960000	42228000	6517900	0	842420000	432740	64	1	Q9BQE3
DSYVGDEAQSK	1.1	206500000	82787000	25836000	11108000	800720	16944000	100340000	64	1	P60709
TLDNDIMLIK	7.7	112720000	330810000	143630000	4694600	3489600	273250000	74488000	64	1	P35030
AGNLGGGVVTIER	1.2	153900000	96672000	59779000	28698000	2403400	228060000	15241000	64	1	P35268
AAVPSGASTGIYEALELR	1.2	66888000	35745000	26992000	0	0	325480000	150770000	64	2	P06733
AGLQFPVGR	1.4	2577800000	620500000	145810000	18533000	1647100	580800000	95278000	64	1	Q16777
GGKPEPPAMPQPVPTA	4.5	168050000	137760000	129030000	55891000	14460000	51217000	28301000	34.79	2	P23396
ASYDVSDSGQLEHVQPWSV	3.6	10026000	2733900	1504700	19619000	20817000	9760900	419380	13.83	1	Q01813
S(+42.01)ETAPAAPAAPAPAEKTPVKK	0.5	57916000	13326000	33674000	111420000	131160000	103770000	0	64	2	P10412
SFVLNLGK	1.4	31529000	1477100	16726000	6690700	0	20069000	8667200	64	1	P09382
A(+42.01)SNVTNKTDPR	1	18308000	1901900	7614600	41808000	25224000	42445000	91118	21.98	1	P07910
IRDEMVATEQER	9.8	12828000	11269000	14247000	11126000	0	22824000	1979700	64	2	P16615
VSESSDVLPK	6.8	31530000	62442000	45577000	30796000	14622000	5819000	1071100	14.82	1	P05787
AQAAAPASVPAQAPK	5.4	157570000	116130000	62907000	54639000	24358000	149730000	12925000	21.75	2	P47914
IGVITNR	1.4	64198000	49880000	35200000	24199000	3456800	28435000	6184900	60.25	1	P62701
LPLQDVYK	1	117840000	23584000	6501100	17705000	9757400	171690000	106900000	64	1	P68104
QTFSPFGQIMEIR	5.5	6237900	1361600	1145200	394110	565960	5294900	0	64	1	Q01085
DIPGLTDTTVPR	1.2	90792000	112100000	74009000	16599000	2987000	1273600000	15843000	64	1	P62753
ITVNDLPVGR	0.9	62367000	122490000	101680000	66668000	15762000	71821000	2293100	23.41	1	Q06830
EGMNIVEAMER	1.7	47830000	21465000	3463100	0	0	19832000	76355000	64	1	P62937
LAPITSDPTEATAVGAVEASFK	1.3	146790000	288030000	294040000	7523900	16638000	125150000	83158000	39.08	2	P14618
KPYGVLYK	7.1	14406000	30096000	16165000	5857100	0	4573200	25637	64	1	Q9H7B2
VEEATVEER	10.8	16240000	2292300	10377000	40786000	21257000	142150000	1188800	17.79	1	Q14244
DVNAAIATIK	0.6	223870000	293720000	201880000	101380000	14562000	1814600	44406000	34.87	2	Q9BQE3
M(+42.01)DDREDLVYQAK	1.1	85101000	114570000	62571000	7732000	5947800	28672000	71800	39.46	1	P62258
ISLGLPVGAVINC(+57.02)ADNTGAK	1.8	24437000	68292000	40366000	4539100	2975900	7676700	307180	22.95	2	P62829
ELEVQHPAAK	1	5585500	14317000	6651000	1969400	0	60487000	2039600	64	1	P50990
ITIGQAPTEK	3.6	18454000	22459000	22078000	27920000	12515000	5269300	966290	3.83	1	P11586
APVNVTTEVK	3.6	18454000	22459000	22078000	27920000	12515000	23646000	966290	3.83	1	P68104
VSYARPSSEVIK	7.9	22366000	80249000	20972000	0	0	74398000	227360	64	1	Q15717
A(+42.01)DAEVIILPK	1.4	5276500	3325400	2386800	1580200	1195400	12967000	0	14.97	1	O60832
GTAEVELKK	0.4	5305600	12182000	7108500	3985000	0	200670000	0	64	1	P14618
GAPLVKPLPVNPTDPAVTGPDIFAK	1	1531600	2216700	1259800	0	0	84596000	0	64	1	Q9H3S7
VLGTEELYGYLK	0.6	38685000	79884000	57746000	39902000	11718000	390490000	0	19.13	1	P19784
ALQALEELR	6.6	15734000	30011000	12144000	6510300	3401700	92355000	637430	8.82	1	Q15149
GPPVSELITK	3.9	116570000	278980000	143150000	114980000	42153000	1306500000	363140	64	1	P10412
GLTPSQIGVILR	1.3	32802000	41108000	21874000	9077900	1506400	21155000	4357900	60.04	1	P62277
A(+42.01)DKMDMSLDDIIK	1.9	43904000	14628000	10628000	0	0	18935000	0	64	1	Q86V81
EAENPEGEEKEAATLEVERPLPMEVEK	1.4	64336000	92244000	85661000	0	0	22675000	0	64	2	P51858
A(+42.01)GTVVLDDVELR	0.8	12869000	25930000	12638000	2833600	597540	32158000	0	43.4	1	P25205
ISGWNGDNMLEPSANMPWFK	0.5	7587300	6856200	31080000	0	0	5975900	0	64	2	P68104
AEAESMYQIK	1.5	53386000	14275000	3968300	0	0	38385000	11068000	64	1	P05787
AAYEAELGDAR	0.8	18775000	4930300	13156000	9743600	4987600	143720000	10752000	12.38	1	P02545
DNDIMLIK	2.2	92782000	173560000	238940000	26788000	5916200	17616000	0	40.39	1	P35030
FGYVDFESAEDLEK	1.6	76664000	14079000	6086000	0	0	6980400	18689000	64	1	P19338
A(+42.01)AGTLYTYPENWR	1.2	53015000	111340000	56500000	994810	9890300	6237600	13261000	64	1	P26641
AIEENNNFSK	0.7	12404000	24339000	13156000	9743600	4987600	205270000	2665400	4.88	1	P16949
EVILIDPFHK	0.5	17391000	51774000	28050000	7130400	0	21010000	0	64	2	P61313
SLAGSSGPGASSGTSGDHGELVVR	1	43020000	45229000	35007000	27853000	13615000	831610	14017000	6.86	2	P29692
S(+42.01)ETAPAAPAAPAPAEKTPVK	0.7	106950000	45664000	106080000	221670000	113840000	8478100	545660	4.85	2	P10412
SAINEVVTR	1	89106000	52361000	28722000	18502000	867420	17518000	7407700	64	1	P62899
TAAENEFVVLK	0.5	23818000	42981000	28977000	16234000	5941600	25605000	977840	7.23	1	P08729
SGPSIVHR	3.1	1285600	3782300	0	0	0	9240800	0	64	1	P60709
IGIVGLPNVGK	1.8	7428000	17201000	7030400	0	0	131350000	0	64	1	Q9NTK5
SMMSAYER	11.2	7384100	17579000	4535200	0	0	34807000	0	64	1	P18583
FGQGGAGPVGGQGPR	0.9	60236000	26403000	17623000	12108000	8283800	22036000	5851700	28.58	1	P23246
AMVEYEIDLQK	11.7	18616000	31927000	24757000	0	0	15871000	2189700	64	1	P09874
SQPAILLLTAAR	1.2	20288000	41108000	21874000	9077900	1506400	40846000	4357900	27.29	1	Q5JTV8
EIAQDFK	2	366250000	16228000	2963100	0	0	7210500	20214000	64	1	Q71DI3
VDEFPLC(+57.02)GH	0.2	4222600	8561700	2502700	6362800	3685500	3250900000	98662	64	1	P27635
EAGEQGDIEPR	0.9	17012000	13737000	7440900	4149400	0	795360000	1889500	64	1	Q13283
NDLAVVDVR	7	63873000	47132000	14468000	3870300	6111100	12220000	7815500	64	1	P19338
AGNFYVPAEPK	1.1	44516000	36334000	21094000	14084000	0	72256000	3174900	64	1	P18124
IKDEPPPLSPAPLTPATPSSLDPFFSR	2.3	664400	2488300	833750	0	0	267870000	299050	64	1	Q7Z6Z7
YQPPTVVPGGDLAK	1	10827000	9130000	8770100	20025000	11344000	97507000	503920	4.12	1	Q9BQE3
VNITPAEVGVLVGK	0.9	1319500	4597500	2000200	0	0	3219000	97989	64	1	P07737
ILGATIENSR	2	18994000	8079200	2656300	0	0	6701700	8139900	64	1	P08727
IDDVVNTR	6.8	8261300	14819000	4898200	12813000	0	1383400000	3069800	64	1	P50991
VQSDGQIVLVDDWIK	4.8	30490000	1450700	75189000	28026000	22787000	42547000	2500800	51.83	1	Q08211
TPALIVYGDQDPMGQTSFEHLK	2	5812800	16462000	8371500	0	0	79771000	22984000	64	1	Q96IU4
VKGQVSEMAVLLIDPEPQIAALAK	2.3	1784100	4081600	1898700	0	0	9592800	0	64	1	Q15021
LSDSKVKSMTSAHGSASVNSR	0.7	1017000	292550	1902200	643660	1384800	69663000	0	6.5	1	Q5SW79
LAQEGSEVNVIGIGTSVVTC(+57.02)PQQPSLGGVYK	1	394320	537780	1433800	0	0	47166000	0	64	1	Q6XQN6
TATQLAVNK	6.6	10837000	17796000	10752000	7488800	1371500	201800000	2581800	12.98	1	Q99832
EKLAPVPFFSL	0.5	312730	421480	866920	0	275220	27205000	0	64	1	P07741
M(+42.01)DGIVPDIAVGTK	1.5	13101000	16662000	11248000	774490	1887700	10205000	0	45.1	1	P26599
LLGWIQNK	1.3	11950000	18366000	9231200	5257300	2017700	53859000	25047	12.33	1	O75369
KGDIVDIK	0.9	48123000	15666000	8330400	4031600	0	43365000	4885200	64	1	P46778
ELNHMLSDTGNR	7.4	27310000	66606000	36963000	17565000	2639100	851220000	648740	25.24	1	Q96FQ6
TAENATSGETLEENEAGD	1.2	20891000	20314000	13830000	12967000	8677300	134440000	4326500	5.61	1	Q9UQ80
EAIEGTYIDKK	0.8	98974000	64823000	44215000	36196000	8739000	20912000	8479500	39.01	2	P62280
NLQYYDISAK	0.7	37621000	50413000	29228000	10514000	0	40898000	20884000	64	1	P62826
ADGYVLEGK	1.2	43865000	36281000	21960000	12630000	0	92765000	4693900	64	1	P62241
FLENGSQEDLLHGNPGSTYLASNSTSAPNWK	1.8	4808500	5087900	5304300	0	0	19688000	0	64	1	Q7Z2W4
GDLGIEIPAEKVF	0.3	799030	0	0	269140	3726000	20069000	0	64	1	P14618
GNFQTIGLSAAAR	5.3	28531000	20867000	26690000	8005500	1500700	12308000	519640	57.04	1	P05187
S(+42.01)DAAVDTSSEITTKDLK	0.5	30636000	5482200	26825000	13847000	107030000	2679000	145760	64	2	P06454
SSNPMMVLQLPER	7.2	12398000	16350000	7624300	10445000	8832400	9002200	2207400	2.46	1	P78406
WQLSVATEQPELEGPR	3.2	30793000	23898000	13455000	6254200	4542600	13198000	3378000	23.29	1	Q9NR30
TNGKEPELLEPIP	8.3	8756500	14579000	7565100	8859100	8793400	1485900	0	3.66	1	P46778
FLSSAAAVSK	3.6	49040000	104270000	66799000	54085000	6647000	93708000	3296300	15.69	1	P27708
TFEVTPIR	1.5	5380100	6817600	2170900	0	0	26946000	583230	64	1	Q14739
AIPTVNHSGTFSPQAPVPTTVPVVDVR	0.4	1411600	4560000	2497900	0	0	31424000	0	64	1	Q16513
ADGYEPPVQESV	1	69548000	43193000	31636000	21526000	8271200	6097100	7200400	29.39	1	P61247
IIAPPER	1.1	50217000	36836000	13888000	5174900	0	7702900	117400000	64	1	P60709
IVDVIDQNR	1.3	28250000	57067000	39268000	34961000	5799600	21065000	0	13.74	1	P50914
DAGTIAGLNVMR	15.6	66415000	18850000	7533000	866850	6209900	54829000	13749000	64	1	P11021
NLQEAEEWYK	0.8	96595000	40324000	14900000	2485700	0	1631400	20192000	64	1	P08670
YIDQEELNK	1.3	90296000	113760000	47939000	9609500	0	29042000	51884000	64	1	P08238
AGGIETIANEYSDR	0.6	13505000	25126000	20181000	11032000	2342500	3744700	4693100	10.73	1	P34932
LC(+57.02)QIGQFTVPLGGQQVPLR	1.1	424530	1229500	893090	0	0	5009400	0	64	1	P80217
SFLGMESC(+57.02)GIHETTFNSIMK	0.7	8395100	23239000	18736000	0	0	42009000	0	64	2	P60709
DPGVLDR	1.7	53961000	105340000	56459000	7383400	0	14289000	12736000	64	1	P31949
A(+42.01)TDTSQGELVHPK	0.7	12978000	11633000	8887600	8462400	10274000	6421500	495220	3.03	1	Q5SSJ5
TNEGVIEFR	0.7	44663000	88620000	35276000	11689000	6557600	5188900	2258600	13.51	1	Q13247
DTIVLLC(+57.02)KPEPELNAAIPSANPAK	0.4	2180200	7430300	3470700	0	0	2430200	0	64	1	Q8WUM4
VANVSLLALYK	2.7	54575000	565170	0	0	0	15172000	3790000	64	1	P62266
GAVDGGLSIPHSTK	1.1	85601000	76056000	50105000	9275700	0	107280000	6171600	64	2	P46777
IDEPLEGSEDR	2.2	37039000	97670000	39181000	0	0	60231000	17123000	64	1	P61978
VGVNGFGR	1.7	50438000	81085000	68638000	21211000	0	40846000	20077000	64	1	P04406
YGPSLMPGGNK	9.6	6776900	9938300	6251800	11055000	2037200	138000000	1486800	5.43	1	P52209
S(+42.01)IHFSSPVFTSR	1.2	74880000	14671000	15040000	1496400	925530	46849000	70981000	64	1	P08729
ASPATQPPPLLPPSATGPDATVGGPAPTPLLPPSATASVK	1.5	59847000	83525000	51192000	1513600	16633000	22482000	1755900	64	2	Q07666
SPAVKPAAAPK	1.3	11289000	15809000	8201800	0	0	19589000	693930	64	2	Q14978
ITVTSEVPFSK	3.5	68266000	47450000	15749000	2385600	6151800	9525800	16249000	64	1	P35268
A(+42.01)DKEAAFDDAVEER	1.1	28535000	31545000	27335000	22030000	8680300	20952000	266710	6.12	2	Q09028
ALDKLDGTEINGR	0.9	24249000	26014000	18502000	19315000	13107000	373300000	795380	3.38	2	Q13247
VSAPGVQGDVK	6.5	8560800	13166000	10694000	9110200	0	49102000	683190	64	1	Q09666
PSIVGRPR	1.6	55636000	57719000	47542000	26099000	5596200	28622000	9984500	25.24	1	P60709
VSGGLEVLAEK	9.7	25884000	32601000	18758000	17615000	8878600	16033000	6967500	5.81	1	P39687
IVFVPGC(+57.02)SIPLTIVK	0.1	391260	1516800	439440	0	0	21058000	0	64	1	P54136
MGESDDSILR	10.8	26962000	21655000	3939200	5029700	8253300	2132300	2484300	24.35	1	P63220
WRPVDLAQVK	5.3	99153000	230280000	127910000	59316000	18900000	4877100	76973000	12.18	2	P32004
ALEDAFLAIDAK	1.3	3301300	7947400	1879200	0	0	58281000	1898200	64	1	O15355
VIISAPSADAPMFVMGVNHEK	1.7	189130000	141420000	102040000	0	0	20235000	211590000	64	2	P04406
PMEKPEVVK	3.1	8365600	13166000	10694000	9110200	0	30914000	2027600	64	1	P62841
NSNPALNDNLEK	1.8	23370000	53653000	33297000	12631000	1475600	15751000	14002000	36.36	1	O00299
IIITVVEEQEQK	7.4	16771000	26199000	14257000	10931000	3853400	59653000	4510800	7.43	1	Q15149
AAIISAEGDSK	7.2	27504000	2274800	10377000	40786000	21257000	7667900	1489800	27.62	1	P35232
YVMTTTTLER	1	25108000	50413000	29228000	10514000	0	429870000	20884000	64	1	P05198
AIDDNMSLDEIEK	1.9	25998000	8238200	3773500	0	0	12238000	2432600	64	1	P31327
IVKPNGEKPDEFESGISQ	0.7	4160600	3863800	2360400	9259300	5319600	24844000	4297600	64	1	P62081
GVQVETISPGDGR	5.4	48692000	119650000	80565000	24188000	4310600	12236000	317200	27.76	1	P62942
GALQNIIPASTGAAK	1	364900000	265090000	258070000	62696000	5784100	33157000	128570000	64	2	P04406
GFSVVADTPELQR	1.2	9085300	16741000	10005000	3615500	3255600	17370000	4820600	5.14	1	Q14847
IMGTSPLQIDR	2.9	42746000	26965000	18115000	5046300	9590100	1633200000	5228300	30.52	1	P31327
GSAITGPVAK	0.5	32520000	16941000	9397800	5212700	0	5345600000	4952500	64	1	P62829
GIMNSFVNDIFER	1.7	3969100	4804300	2231600	0	0	21703000	5222000	64	1	Q99879
ISSLLEEQFQQGK	1.3	204070000	99362000	76244000	34004000	13648000	36877000	20549000	58.4	2	P62241
VGDEAQSKR	6.6	3123100	6320200	4631900	3590400	0	34295000	401800	64	1	P60709
PEEHPVLLTEAPLNPK	1.1	142890000	245780000	152940000	102640000	17635000	121690000	21349000	13.94	2	P60709
IGLFGGAGVGK	7	27128000	3645000	2591600	17705000	9757400	4059000	2594900	39.33	1	P06576
YVASYLLAALGGNSSPSAK	1.8	204330000	29362000	15679000	0	0	18203000	5638600	64	2	P05387
SAEKEISLWFKPEELVDYK	8.6	54104000	72838000	66458000	0	0	113670000	293370000	64	2	P22392
A(+42.01)EPSAATQSHSISSSSFGAEPSAPGGGGSPGAC(+57.02)PALGTK	0.5	14224000	28881000	23951000	5201100	13088000	15198000	0	64	2	O95197
SKKVEEAEPEEFVVEK	0.7	18310000	22092000	21227000	15003000	2222900	7998600	0	13.95	1	Q13185
DAITQALFLR	5.2	2199100	879080	582190	0	0	14892000	0	64	1	Q9UNX4
QITVNDLPVGR	3.5	132010000	230280000	127910000	59316000	18900000	44520000	76973000	12.18	2	Q06830
TNSTFNQVVLKR	1.1	63329000	24839000	24769000	13683000	0	2515100	751860	64	2	Q07020
LITLEEEMTK	3.4	31230000	36417000	29406000	10960000	0	13290000	6585000	64	1	P07237
GIDIFTGK	7.3	22368000	22423000	15807000	4551100	0	29466000	0	64	1	P63241
TVTELVTK	2.2	4810900	6774400	3278900	0	0	4936600	1555400	64	1	Q8IY81
AEDGENYDIKK	1.4	1659500	4806000	2227600	0	0	877430000	1763000	64	1	O75347
VVLIGGKPDR	1.7	40230000	52859000	15744000	0	0	166230000	8708700	64	2	P61978
INLIAPPR	1.6	7292000	7300500	3863000	0	0	22258000	1802500	64	1	P05198
PSQMEHAMETMMFTFHK	2.1	167060000	21070000	25705000	0	0	34773000	162660	64	3	P60903
SIYYITGESK	1.1	53159000	76391000	39055000	4191600	0	178570000	18728000	64	1	P08238
AVFVDLEPTVIDEVR	1.3	548790000	88935000	74094000	4383000	1850600	1093500000	133660000	64	2	Q9BQE3
QRPPQTPLR	8.2	26865000	1413700	8103700	18952000	103840000	49587000	387380	64	1	Q9NZB2
NDENEHQLSLR	4.5	85041000	989020	103660000	92462000	13050000	49587000	86610	64	1	P06748
TTGIVMDSGDGVTHTVPIYEGYALPHAILR	1.7	1341800000	317550000	1611900000	1558000	4963600	11083000	0	64	3	P60709
DNFVFGQSGAGNNWAK	1.3	40944000	109170000	61067000	10287000	24201000	7883200	214490	64	2	P07437
DFSDITKK	1.2	7478900	4674000	1921300	0	0	2888800	536910	64	1	Q9NR30
IGPLGLSPK	6.4	106020000	35203000	22195000	7863900	5596200	61207000	10645000	64	1	P30050
HRPELIEYDK	6.9	10127000	29450000	10554000	0	0	37447000	8484000	64	1	O43707
AEDKEWMPVTK	1.4	128310000	90524000	57656000	13717000	0	176740000	2683000	64	2	P15880
VGINYQPPTVVP	2.4	13894000	33384000	15154000	10523000	6524600	25733000	0	8.59	1	Q9BQE3
MEPGNGSLDLGGDSAGR	0.2	6315600	3300600	2018500	14973000	11286000	34807000	71079	64	1	Q00839
GFGDGYNGYGGGPGGGNFGGSPGYGGGR	0.8	57774000	61256000	54573000	13841000	15997000	271870000	8121000	10.35	2	P22626
ALTVPELTQQVFDAK	1.6	604120000	608850000	359340000	35937000	56606000	40913000	71740000	54.54	2	P07437
HGYIGEFEIIDDHR	1.9	57411000	33868000	13712000	0	0	45370000	20467000	64	2	P62244
S(+42.01)ETAPAAPAAPAPAEKTPVKKK	0.6	134090000	6972300	23708000	211970000	427800000	8325800	0	64	3	P10412
DGIVMPTNPK	1	43897000	82206000	74734000	40388000	14102000	43505000	9144600	10.21	1	Q9Y624
EVDEQMLNVQNK	1.2	247880000	263400000	111010000	13646000	4209000	539800000	75922000	64	1	P07437
GPSSVEDIKAK	1.1	36084000	6482800	12699000	61701000	9711300	264230000	7030700	13.86	2	P06748
YHTSQSGDEMTSLSEYVSR	1.5	160970000	262590000	222050000	102320	3904800	933030000	49740000	64	2	P08238
GYGGSSSSSSYGSGR	0.7	1103800	1403800	1046900	2393600	674740	356900000	69747	64	1	P09651
ASLENSLR	4.5	119600000	13346000	8896500	9407500	4363200	13324000	5087900	64	1	P05783
ARSDEGQLSPATR	0.7	5609000	11414000	6312900	3945300	0	4489000	127000	64	1	Q15149
GVVDSEDLPLNISR	4.9	398900000	845970000	398410000	55715000	1377900	91096000	151740000	64	2	P08238
WGMPPQDAFTTQWLVR	7.4	4500200	8046600	8465400	0	0	6001400	0	64	1	Q12873
TALIHDGLAR	2.6	32339000	27639000	13440000	4619200	0	36448000	2363200	64	2	P25398
NHMWIFVNALIENPTFDSQTK	3.9	2042900	0	518860	0	0	24727000	640910	64	1	P11388
GELAIKDANAK	1	23933000	19971000	8830400	0	0	8709400	178870	64	2	P05787
LTPEEEEILNK	2.8	191850000	123950000	83976000	24489000	4310600	39564000	20047000	64	2	P62241
LEALDANSR	4	37768000	89402000	49112000	16024000	1145100	46391000	819440	64	1	P09496
GFAFVYFENVDDAK	5	16781000	46218000	6273300	0	0	43266000	0	64	1	P62995
VVSIEDPFDQDDWGAWQK	0.5	236870	375710	808640	0	0	15874000	0	64	1	P06733
TAEILELAGNAAR	0.3	9666100	39416000	4553300	4361000	0	31305000	341030	64	1	Q16777
SFKPDFGAESIYGGFLLGVR	3.2	1857000	1580400	1734600	0	0	6267900	3941100	64	1	P35606
IQTQPGYANTLR	12.6	78087000	48083000	21659000	0	0	51229000	6596000	64	1	Q00325
M(+42.01)QDPNADTEWNDILR	0.2	409810	1008900	1040100	0	0	54166000	0	64	1	Q9H2J4
IGAEVYHNLK	4.1	48797000	43077000	19871000	968830	0	6793200	100820000	64	2	P06733
STESLQANVQR	9.2	81893000	11495000	19748000	11667000	0	20560000	7571000	64	1	P26373
EESGKPGAHVTVK	0.8	44434000	145200000	67078000	4709400	0	24423000	16748000	64	3	P22626
NAEQNGPVDGQGDNPGPQAAEQGTDTAVPSDSDKKLPEMDID	1	3755100	7021000	11754000	0	0	12211000	0	64	1	P34932
DLEEDHAC(+57.02)IPIKK	1.2	24991000	76755000	40241000	7958800	0	29131000	399250	64	2	P13639
S(+42.01)SEAETQQPPAAPPAAPALSAADTKPGTTGSGAGSGGPGGLTSAAPAGGDKK	1.2	198620000	218640000	168350000	33450000	0	4850900	2052400	64	3	P67809
ELISNASDALDK	1	27915000	32076000	7690700	0	0	226130000	49740000	64	1	P08238
ILATPPQEDAPSVDIANIR	0.8	52396000	35116000	24452000	7172300	8481100	79329000	41086000	26.04	2	P29401
GGIVDEGALLR	1.1	12253000	28437000	14823000	6199000	2229300	4051600	3498600	12.76	1	O43175
LLEGEESR	1	86561000	71426000	24771000	5077900	0	11611000	34313000	64	1	P05787
VELQELNDR	1.8	15658000	40803000	10476000	0	0	425170000	10894000	64	1	P08670
LITEDVQGK	5.9	66402000	19639000	8465000	4357100	1512600	12692000	10069000	64	1	P61247
VDALNDEINFLR	1.5	47210000	2955000	2449000	0	0	99215000	1855200	64	1	P08729
ALANVNIGSLIC(+57.02)NVGAGGPAPAAGAAPAGGPAPSTAAAPAEEK	0.8	12606000	32476000	29033000	773740	749190	37691000	0	64	3	P05386
VDLMAHMASKE	1.9	9131700	4472600	4346400	8507900	9816200	3418600	405990	4.26	1	P04406
DAVTYTEHAK	1.5	1591200000	37351000	7807200	0	0	98479000	65273000	64	2	P62805
ELLPVLISAMK	2.1	2519600	5962600	1543000	0	0	80252000	0	64	1	P18206
TGHLIYK	9.6	15100000	37249000	17881000	14903000	0	35851000	1269800	64	1	P68104
VDLEPTVIDEVR	0.4	39781000	81956000	59630000	41426000	11718000	35516000	180120	19.62	2	Q9BQE3
LQALKDTANR	6.1	8185600	19971000	8830400	0	0	9911700	178870	64	2	P29401
C(+57.02)VESFSDYPPLGR	4.8	51042000	75519000	47740000	58962000	69771000	78199000	0	23.47	2	P68104
ALEQFATVVEAK	0.8	19329000	20867000	26690000	8005500	1500700	113020000	4568000	26.38	1	P49748
HITIFSPEGR	3.6	31931000	24608000	10277000	64426000	53560000	6377200	130590	9.49	1	P60900
TLETVPLER	1.5	37994000	21299000	14671000	10553000	3758400	8529500	5849700	37.17	1	P22626
HEAGEALGAIGDPEVLEILK	0.5	223810	366390	752680	0	0	57038000	0	64	1	Q9BU89
A(+42.01)AAAAAAAAAGAAGGR	0.8	22636000	23491000	18658000	17436000	10250000	7100900	389490	4.23	1	Q86U42
GALPLDTVTFYK	1.4	23679000	2899000	1772000	0	0	19479000	0	64	1	P30040
LYDKIDPEK	13.5	22121000	10183000	5382000	68559000	12682000	33356000	2719800	12.74	1	O14561
IMVVGSTINDVLAVNTPK	0.6	346190	722340	1008600	0	0	47986000	861580	64	1	O14562
KDGNASGTTLLEALDC(+57.02)ILPPTRPTDKPLR	0.4	25236000	61530000	64264000	0	0	11221000	763980	64	3	P68104
VPEWVDTVK	1	47973000	65669000	66084000	37897000	6590200	15227000	13957000	10.03	1	P39019
EVPAVPETLKK	1.4	48428000	34682000	21820000	21094000	8329900	72520000	0	18.75	2	P18124
AQPSVSLGAPYR	2	14211000	12718000	9153700	8695000	4841500	1441200000	743180	7.36	1	Q96PK6
AQFEQLKDGK	5.4	6011700	11949000	5019200	3037500	0	54309000	1726600	64	1	Q15149
FATHAAALSVR	6.3	48122000	43077000	19871000	0	0	39464000	52513000	64	2	P23246
VFPSIVGRPR	3	20235000	32309000	37130000	18197000	5311800	10586000	197210	6.99	1	P60709
EFTLEFSR	6.5	5842700	8602100	3936800	0	0	29102000	3100700	64	1	P16615
SLVSVTK	7.7	25089000	75648000	41087000	7401100	0	97887000	0	64	1	P08238
KPAAGLSAAPVPTAPAAGAPLMDFGNDFVPPAPR	1.1	75419000	44455000	43188000	0	0	2281600	7646400	64	3	Q9NQC3
ANTVLSGGTTMYPGIADR	4.8	24459000	24897000	21582000	14520000	42339000	30279000	8393500	2.92	2	P60709
VYQWDDPDPR	4.1	27815000	43193000	31636000	21526000	8271200	811680000	7200400	5.22	1	P49327
GLANPEPAPEPK	4.7	4451600	9508000	5063600	3487500	1288000	15720000	68912	7.38	1	O15027
FDQLFDDESDPFEVLK	2.3	13641000	6799200	5566000	0	0	11351000	9294400	64	1	Q8NC51
SWYDNEFGYSNR	0.3	5523400	13167000	14450000	0	0	88800000	678110	64	1	P04406
RFDEILEASDGIMVAR	1.6	46621000	23341000	29276000	0	0	2252200000	0	64	2	P14618
TDITYPAGFMDVISIDK	1.3	78693000	15878000	20964000	0	0	7291300	11117000	64	2	P62701
GHPAPNFK	1.2	15715000	32349000	20895000	15226000	0	29777000	1563100	64	1	Q06830
TGAAPIIDVVR	1.2	165760000	136060000	71710000	19698000	6349800	22388000	14515000	64	1	P46776
GPLMVNSNYYAMDLLYILPTHIQAAR	10.6	5045000	4904500	15131000	0	0	8299900	24326	64	1	P50416
LSELLPEEVEAEVK	1	13058000	3861400	2189900	0	0	22991000	1740600	64	1	Q9Y2X3
LDEC(+57.02)EEAFQGTK	0.7	3262000	7302700	3735800	3959200	1312300	6253800	510460	64	1	P61289
NTDEMVELR	1.4	29742000	48729000	13950000	4095600	0	136020000	12791000	64	1	P61978
TVEAEAAHGTVTR	7.3	59217000	26977000	16426000	4095900	8283800	66243000	1157700	58.67	2	O75874
ISQMPVILTPLHFDRDPLQK	0.7	12355000	25490000	17756000	0	0	6378400	0	64	2	P49915
SHFEQWGTLTDC(+57.02)VVMRDPNTKR	7.8	23439000	4152200	5836300	11904000	24555000	148950000	27146000	17.04	1	P09651
LIATFPDTLTYSAYR	10.7	14413000	14169000	36617000	3668400	696180	2071000	961010	52.6	1	P23229
VKEGMNIVEAMER	5.1	153920000	87696000	37983000	2011200	0	11501000	0	64	2	P62937
PMKSGGGGGGGGSSWGGR	1.2	3132400	4248000	2889100	3144600	5380400	52017000	0	64	1	Q13151
VLATVTKPVGGDK	0.9	119330000	123150000	65527000	13182000	0	5270500	9545400	64	2	Q02878
A(+42.01)DQLTEEQIAEFK	1.6	50420000	73236000	41778000	1804200	584390	7406600	22140000	64	1	P0DP24
QHYIDLK	11.5	6318200	4081100	7981500	7633700	0	25316000	6474000	64	1	P22392
QEYDESGPSIVH	2.4	14939000	21340000	17080000	23699000	11538000	7765100	1242800	22.81	1	P60709
QSSATSSFGGLGGGSVR	0.9	35507000	10029000	6654900	5154800	3876300	90068000	286110	39.17	1	P08727
AGGPTTPLSPTR	1.2	30781000	57656000	44422000	5641700	0	218660000	1839800	64	1	P20700
LESGMQNMSIHTK	1.1	167130000	156920000	84766000	9878400	0	39946000	451660	64	2	P05787
ATAVMPDGQFK	1.7	86501000	209320000	125750000	18354000	370230	12310000	23922000	64	1	Q06830
RVAQDWLK	6.7	12027000	24467000	13786000	9021600	0	14220000	1562700	64	1	Q16891
D(+42.01)DDIAALVVDNGSGMC(+57.02)K	0.8	182620000	568180000	300260000	16344000	25552000	851970000	0	64	2	P60709
KTEAPAAPAAQETK	1.3	72999000	52787000	23377000	0	0	508540000	7739000	64	2	P80723
IEDVTPIPSDSTR	3.6	91813000	74859000	43516000	18724000	9131300	4169600	15585000	34.26	2	P62263
GLVLDHGAR	6.6	5700800	4737700	1716900	6532100	3403400	1488100	1374300	7.06	1	P40227
QPPSQFEPLDMK	0.7	9915700	11382000	9290300	6251700	1392500	42572000	150710	15.27	1	P33993
LAVDEEENADNNTK	0.9	39749000	19853000	7904900	0	0	124940000	1708300	64	1	P02786
KQLELRQEEER	3.5	6975400	7211900	2752500	0	0	192170000	382940	64	2	Q15233
AGIVTSLQAR	6.4	30981000	503920	13786000	101380000	14562000	177450000	9131600	64	1	P49736
LDQPGNLPGSNRR	8.1	11251000	24320000	14097000	9938200	3394700	98434000	0	7.16	1	P46013
VWLDPNETNEIANANSR	1.2	142600000	133140000	85695000	6535000	19371000	167750000	14033000	64	2	P84098
GFAGDDAPR	6.9	27737000	70310000	30810000	26236000	4190300	12829000	8132500	16.78	1	P60709
SGDAAIVDMVPGKP	0.3	7128600	11392000	9624100	8030000	6597100	11907000	975510	64	1	P68104
ELSPAALEK	6	17581000	37488000	24322000	14209000	6066000	26455000	828960	6.44	1	O75683
LSVGVTEPR	6	17581000	37488000	24322000	14209000	6066000	634370000	0	6.44	1	O43464
ETNLDSLPLVDTHSKR	1.8	109010000	51982000	64409000	103950000	30566000	4301100	0	9.62	3	P08670
ISGLGLTPEQK	1	9283800	6952600	4168200	3930000	194780	368030000	1081600	64	1	O95831
A(+42.01)DMQNLVER	0.7	7098000	12408000	8426700	5732200	2278700	54430000	1035200	5.45	1	Q01518
TLTSGGHAEHEGKPY	0	1591100	4150200	3805300	0	0	331010000	482850	64	1	P50238
GHLENNPALEK	5.7	68631000	44391000	17766000	0	0	15123000	8067100	64	2	P05388
VYVGNLGNNGNKTELER	1.1	37863000	30019000	29595000	20037000	2222900	142930000	0	48.33	2	P84103
GGIGTVPVGR	1.6	36678000	23527000	12822000	12581000	2324500	12027000	879890	56.84	1	P68104
LAYIAHPK	1.6	36678000	23527000	12822000	12581000	2324500	1250700000	3564200	56.84	1	P47914
GHYTEGAELVDSVL	4.2	45104000	119200000	83085000	8740400	8431400	33506000	3565000	19.65	1	P07437
TKTEISEMNR	1.5	137990000	38290000	5449700	0	0	33902000	1168500	64	2	P05787
ELTAVVQK	1.2	11217000	15666000	8330400	4031600	0	206030000	6768000	64	1	P23396
A(+42.01)DKPDMGEIASFDKAK	6	271720000	36051000	173600000	427500000	712520000	5086700	280080	64	2	P63313
KVENEDMNKDQILLEK	7.3	65711000	17506000	49066000	123130000	75600000	5813600	545660	7.03	2	Q15019
VDIEGPDVNIEGPEGK	1.8	8305100	10162000	4568700	0	0	963210000	404400	64	1	Q09666
A(+42.01)AAAAAAAGAAGGRGSGPGRR	1.1	6821000	4686000	4103300	3253000	3943000	1707300	0	5.57	1	Q86U42
ATMEAYSR	9.1	4318400	8702900	4536300	0	0	17941000	0	64	1	P20073
LAEFATGNDRK	6.4	4454000	14205000	4825000	0	0	343400000	3026300	64	1	P62258
T(+42.01)GYTPDEKLR	6.4	4454000	14205000	4825000	0	0	33494000	0	64	1	O95139
VILHLKEDQTEYLEER	1.4	105330000	50890000	31812000	0	0	5532500	57645	64	3	P08238
EADDIVNWLK	1.2	20024000	8907400	7398300	0	0	229870000	0	64	1	P07237
VLEVDPNIQAVR	1.3	11155000	11620000	9488900	15113000	13190000	384950000	4918800	2.37	1	P05787
IVSAQSLAEDDVE	4.9	8529200	10306000	8301800	6836700	5038900	15162000	0	2.41	1	Q15388
DSTLIMQLLR	2.2	7179100	9014500	1172200	0	0	10712000	31891000	64	1	P31946
YRPGTVALR	1.5	1682900000	776640000	278690000	26729000	0	58907000	103400000	64	2	Q71DI3
NDEELNKLLGK	1	856950000	461020000	133380000	10763000	0	3436200	272650	64	2	Q16777
KKPTPIQLNPAPDGSAVNGTSSAETNLEALQK	1.4	3569000	10590000	7254800	0	0	9739000	0	64	2	Q02750
IANPVEGSSGR	1.1	24453000	31099000	17300000	16994000	2487700	16161000	4121300	21.86	1	Q15365
LNEQQSVLQR	14.8	8577700	10522000	9989600	5727500	8567800	30503000	0	1.84	1	Q14683
GNWEQPQNQNQTQHK	8	33835000	64609000	43494000	43327000	17124000	5946100	14790000	64	1	Q14157
EDSQRPGAHLTVK	1.4	117910000	178280000	76161000	1471400	0	116640000	14457000	64	3	P09651
DLKDYFSK	1.1	15582000	14797000	6967400	0	0	242490000	779880	64	2	Q14103
LSAIYGGTYMLNKPIEEIIVQNGK	1.4	1815500	593820	2684000	0	0	95128000	1510200	64	1	P50395
PYGGGYGSGGGSGGYGSR	5.4	2131300	4169700	3202100	0	0	144900000	126120	64	1	P51991
GFGFVTFDDHDPVDKIVLQK	1.7	371580000	29339000	109960000	3153600	3176900	25464000	106740	64	3	P22626
VISSIEQK	1.1	22454000	67712000	28027000	9044900	0	22362000	3454900	64	1	P31946
DLQQYQSQAK	5.3	8419000	20167000	0	0	0	15874000	1104300	64	1	O75396
GPGNPVPGPLAPLPDYMSEEKLQEK	0.9	9797700	5750900	4167600	0	0	56237000	0	64	1	Q6P2Q9
PGPTPSGTNVGSSGR	0.9	15973000	11384000	6621900	5958000	2488000	250160000	3247000	21.47	1	P60468
FPSIVGRPR	1.4	80926000	1805600	60669000	33951000	11598000	301390000	0	64	1	P60709
TDKSSASAPDVDDPEAFPALA	1.1	33123000	5023100	15373000	34307000	34768000	18932000	553210	15.16	2	Q8NC51
LYTLVTYVPVTTFK	8.2	84911000	19365000	8513400	2572900	3315900	31122000	13852000	64	2	P62899
VVSPWNSEDAK	16.1	12266000	10489000	5699400	8507900	9816200	3930200	1542800	4.71	1	P11177
C(+57.02)SGAIIVLTK	2.6	15296000	22309000	15779000	23155000	13816000	3324600000	85826	16.32	1	P14618
AAAAAAAAAPAAAATAPTTAATTAATAAQ	3.5	88742000	89472000	81719000	49626000	52318000	2237100	4914600	3.44	3	P37108
DLSTIEPLK	9.2	26263000	9807800	3540400	101380000	14562000	527510000	6236800	50.05	1	P39687
VIHLSNLPHSGYSDSAVLK	1	90622000	25624000	18245000	91222000	98337000	189690000	0	12.04	3	P43243
TGNFQVTELGR	4.8	14927000	8682400	4768000	31764000	5970100	99630000	1057700	6.66	1	O75643
A(+42.01)ASTASHRPIK	1	6250600	12920000	5885400	5297700	2927000	913750	404620	4.41	2	P41236
FLDASGAK	3.5	15307000	16375000	17685000	16728000	13587000	14046000	0	1.45	1	Q7L1Q6
PVSSAASVYAGAGGSGSR	1.1	199810000	143110000	82459000	15114000	2696200	18292000	18743000	64	2	P05783
YTPSGQAGAAASESLFVSNHAY	1.9	57263000	82320000	42420000	0	0	29727000	37155000	64	2	P04075
M(+42.01)EMEKEFEQIDK	1.7	3192400	2133000	1667800	0	0	20128000	0	64	1	P18031
EYGGLDVLVNNAGIAFK	2.8	2008100	773930	1745300	0	0	17249000	2109500	64	1	P16152
SQEAQSLQQQR	6.4	1166300	2010300	1305500	885770	0	252130000	115240	64	1	Q08379
QGANINEIR	1.2	16277000	22226000	12319000	7729200	1175600	815910000	3103400	32.27	1	Q15365
ATNESEDEIPQLVPIGK	0.9	36297000	30440000	17199000	8335500	5729100	77328	3378000	20.91	2	O76021
ILVTGGSGLVGK	0.5	3206600	7257300	5458100	2947300	370070	50127000	0	64	1	Q13630
TIAPQNAPR	8.3	14194000	30096000	16165000	5857100	0	8685300	2095500	64	1	Q9NYF8
VETGVLKPGMVVTFAP	4.9	145540000	245370000	89096000	2572900	3315900	89125000	13852000	64	2	P68104
PEFLEDPSVLTK	1.1	34077000	39696000	24679000	6090100	399570	5393100	74749000	64	1	P42167
VVTDTDETELAR	1.4	18962000	21723000	11599000	3896900	0	10386000	0	64	1	P05198
EVPAVPETLK	2.1	37464000	43400000	25317000	20477000	3714100	16944000	10952000	25.42	1	P18124
AEPVEVVAPR	0.6	14010000	16959000	9535600	4619200	0	341600000	2363200	64	1	P09874
ILDAVVAQEPLHR	0.8	42386000	6629400	139440000	31684000	3048400	33701000	1576500	45.74	2	Q15029
GDGESQPQFPAVPLEPLPTTEGTPGLPLQQAEER	3.7	256520	728560	554030	0	0	8610300	0	64	1	Q9C0C2
YLQDNPASGEK	9.6	7800100	2234100	21782000	11307000	0	5412800	13652000	64	1	Q16850
QLFHPEQLITGKEDAANNYAR	1.7	532180000	299080000	413460000	26606000	14080000	1685900	0	64	3	Q9BQE3
NMGGPYGGGNYGPGGSGGSGGYGGR	1	188430000	53280000	68347000	26338000	8061400	9987100	0	64	2	P22626
GDLPFVVPR	0.4	4800400	11018000	6654600	4199800	2130000	156190000	0	64	1	P35579
EANNFLWPFK	1.4	43135000	7052900	2769900	0	0	156190000	2585200	64	1	P18124
EVFEDAAEIR	5.5	39887000	90399000	28305000	4201300	5909500	5384000	12363000	21.52	1	P19338
SLPVSVPVWGFK	1.8	670670	1033000	766880	0	0	1349000000	136310	64	1	Q96B36
HYILDLLR	1	12876000	30011000	12144000	6510300	3401700	37968000	0	8.82	1	O75153
SSILLDVKPWDDETDMAK	1.7	10968000	14784000	12977000	0	0	58220000	0	64	2	P24534
EVGSIIGK	1.1	19285000	28024000	13718000	10570000	15194000	112020000	4191700	2.74	1	Q15365
TSTILAAAR	5.9	7398300	17130000	10015000	6615300	0	76878000	1106900	64	1	P35249
EAPPMEKPEVVK	0.6	104870000	100070000	60005000	41691000	1448800	42009000	19790000	64	2	P62841
SYC(+57.02)AEIAHNVSSK	1.2	12315000	36245000	17340000	6845100	0	228870000	279680	64	2	P62910
GGMGSGGLATGIAGGLAGMGGIQNEKETMQSLNDR	1.6	443590000	20460000	123570000	0	0	39682000	0	64	2	P05783
YVRPLPPAAIESPAVAAPAYSR	0.4	4563200	9863200	7224800	2807500	2920600	20139000	0	64	1	P04792
ATFIKVPQNQNGK	1.1	26311000	30424000	39635000	37183000	0	18650000	0	64	2	P19338
EGAFSNFPISEETIK	1.5	63118000	45110000	17365000	1001700	0	240810000	6489500	64	1	Q9NR30
LTIAEER	16.9	55092000	37249000	13093000	4952900	0	16687000	4142300	64	1	P62701
LQAEIEGLKGQR	1.3	147230000	46174000	26579000	2153200	0	32251000	192310	64	2	P05787
DNQLSEVANK	5.4	11454000	12358000	5069200	1779700	0	1278300000	2209800	64	1	Q14978
SPEEGAETPVYLALLPPDAEGPHGQFVSEK	1.5	21694000	51014000	37881000	0	21293	66795000	3130100	64	2	P16152
DYGNSPLHR	1.5	23177000	34764000	10862000	0	0	6848500000	2693600	64	2	P26599
DSAQNSVIIVDK	7.1	28559000	61363000	42516000	8625000	0	188450000	5095700	64	1	P02786
EALPDGVNISK	6.7	4780600	5239900	8991200	2740500	0	10540000	586180	64	1	Q9NRF9
SGVSLAALKK	1.1	434110000	42839000	24705000	16398000	0	17323000	0	64	2	P10412
EAMEDGEIDGNKVTLDWAKPK	3.1	111030000	89845000	81327000	0	0	143070000	0	64	3	P19338
IGYNPDTVAFVP	0.5	8766500	29994000	9618200	1935700	0	124130000	0	64	1	P68104
STQAPLIIRPDSGNPLDTVLK	1.3	3293300	4140700	1269800	0	0	1152900000	797360	64	1	P43490
FIEEHATK	7.8	10932000	29248000	13977000	6168100	0	256320000	1485700	64	1	P13667
IGGPILPSER	1.2	7859400	8783600	5490300	4993300	0	18301000	283510	64	1	P49419
QLFHPEQLITGK	1.1	132970000	288480000	113520000	4232800	0	7079400	110770000	64	2	Q9BQE3
AQYEDIANR	1.2	188670000	12408000	4272400	1656100	0	14852000	15268000	64	1	P05787
VKLAADEDDDDDDEEDDDEDDDDDDFDDEEAEEKAPVKK	0.2	27561000	38275000	51442000	0	48089000	252310000	0	64	2	P06748
NVYDLTSIPVR	4.9	2402500	7947400	1879200	0	0	6729100	806470	64	1	Q9UNN5
GLEFFDQPAVPLAR	0.4	99505	329030	168500	0	0	66111000	0	64	1	P29372
ADSAVSQEQLRK	5.7	5718700	12608000	7289300	6651500	1810000	260700000	12748	53.84	1	Q9UKS6
ALDVMVSTFHK	4	210880000	66939000	25866000	2886600	394730	262220	12844000	64	2	P26447
VTIAQGGVLPNIQAVLLPK	1.7	7817600000	1350800000	530470000	8500400	1404100	293880000	206030000	64	2	Q16777
MGGEEKPIGAGEEK	0.7	8945100	19851000	12548000	2695800	0	105230000	1676300	64	2	P26639
A(+42.01)AAAELSLLEK	1.1	2473500	8282600	3600000	484750	0	225820000	0	64	1	O43324
T(+42.01)MDKSELVQK	2.5	7938300	9887700	10517000	12754000	3129700	872170000	351960	4.08	1	P31946
ALPILEELLR	1.5	71861000	246600000	108210000	0	0	89162000	0	64	1	Q6ZXV5
VAFSVAR	9.4	29828000	24047000	8311100	0	0	11170000	5407200	64	1	P39023
KPEDWDERPK	12.3	12923000	30789000	17437000	0	0	519620000	2275500	64	2	P27824
QLFHPEQLITGKEDAA	0.8	1024400	1890100	1597400	1547000	87621	23370000	760600	64	1	Q9BQE3
GAPAAATAPAPTAHK	0.9	21631000	21058000	12065000	10652000	2827000	267240000	1581000	21.77	2	Q92522
KQGGLGPMNIPLVSDPKR	1.5	145790000	182290000	320290000	60164000	53087000	42329000	0	6.03	3	Q06830
GTGIVSAPVPK	5.5	92415000	17283000	6758100	2747600	83610000	3187600	122420000	64	1	P15880
C(+57.02)(+42.01)DKEFMWALK	0.2	1093100	2916200	2549500	0	0	173800000	0	64	1	P58546
DIDSPPITAR	1.6	67416000	100100000	98128000	87759000	46446000	90867000	245610	21.55	1	P14618
IDIIPNPQER	1.2	78334000	110270000	68201000	17713000	2805800	191320000	52654000	64	1	P08238
GTDLWLGVDALGLNIYEKDDKLTPK	2.6	5064000	14866000	3699900	0	0	2012300	46692	64	2	P15311
AQNVTLEAILQNATSDNPVVQLSAVQAAR	5.4	7864600	13154000	20890000	0	0	2282600	0	64	1	O00505
SNIFVIGK	1.5	11024000	31095000	16726000	6690700	0	44332000	758630	64	1	P62701
EGIPALDNFL	0.6	876490	2892600	1489900	0	0	155610000	0	64	1	P13639
AALQELLSK	1	92495000	29927000	17446000	4875900	356590	117170000	7443900	64	1	P62851
MGLIQTADQLR	0.8	7684400	12718000	9153700	8695000	4841500	236220000	480240	4.22	1	P18031
TGIIC(+57.02)TIGPASR	0.8	7684400	12718000	9153700	8695000	4841500	65643000	743180	4.22	1	P14618
DLQMVNISLR	3.9	57076000	142230000	55222000	4829000	0	12323000	46843000	64	1	Q99623
ITLPVDFVTADKFDENAK	1.8	65382000	22046000	12942000	0	0	294740000	17056000	64	2	P00558
TADDPSLSLIK	5.5	16758000	8216600	7451700	9347600	9659900	34861000	1972400	6.59	1	P39656
ATAPQTQHVSPMR	5.4	18025000	34020000	18387000	13841000	3394700	106320000	1764700	10.02	2	P29692
LQIEDFEAR	0.9	10807000	17999000	12319000	11055000	2037200	37079000	0	8.84	1	Q9P0J0
LLAELEQLKGQGK	0.8	7230400	10147000	13204000	12801000	0	147540000	68376	64	2	P08670
NLDDGIDDER	1.9	9464300	10766000	3587200	0	0	10656000	2483900	64	1	P11940
VGSTSENITQK	0.9	13994000	11949000	5019200	3037500	0	17556000	1726600	64	1	O00571
FFLSSGLIDKVDNFK	5.6	8075200	3054300	11131000	1083100	7963100	6309300	0	15.83	1	Q9BTV4
ALLQSSASR	3.2	22831000	21420000	15467000	6829600	0	14072000	2221100	64	1	Q9UQ80
SEDFGVNEDLADSDAR	0.8	16291000	14613000	11637000	598840	0	905570000	27829000	64	1	P04083
MLDEEGDTQTEETQPSETKEVEPEPTEDKDLEADEEDTR	1.1	5406100	14686000	12344000	0	0	119720000	0	64	1	P20042
A(+42.01)APSDGFKPR	1.3	11217000	6282200	5429400	3709400	2768000	7208400	723760	13.69	1	Q92979
SPILVATAVAAR	1.7	33322000	11507000	4058900	0	0	508130	0	64	1	O00571
HIADLAGNSEVILPVPAFNVINGGSHAGNK	1.3	99548000	26076000	118770000	0	0	6147400	257720000	64	2	P06733
NGDNMLEPSANMPWFK	0.6	1738100	4461200	4229400	0	0	16824000	4326600	64	1	P68104
TVSQIISLQTLKK	1.9	32873000	14813000	7880400	0	0	33619000	0	64	2	O76021
GFGFVDFNSEEDAK	2.4	162070000	44448000	7946800	0	0	12213000	5754500	64	1	P19338
IYEDGDDDMKR	1	9561700	11135000	7229500	5707800	5022200	47115000	510730	3.73	2	Q9HB71
VC(+57.02)ENIPIVL	0.6	2887900	10387000	3944300	108180	0	30049000	0	64	1	P62826
TIVEEVQDGK	1.3	18609000	31734000	10502000	4338200	0	14883000	4297900	64	1	Q04695
LREMSPLWEMVQDGIDLK	13.2	1279400	1580400	1734600	0	0	16322000	3941100	64	1	Q9Y697
GYYYEIPSIGAIR	3.2	8970900	16350000	7624300	10445000	8832400	335800000	0	10.2	1	P54289
GIFPVLC(+57.02)KDPVQE	3.2	8970900	16350000	7624300	10445000	8832400	23110000	0	10.2	1	P14618
EMFEDTVEER	1	14023000	17631000	10412000	3209800	0	13921000	0	64	1	Q16576
RLNMATLR	2.1	7582900	12182000	7108500	3985000	0	61637000	419830	64	1	Q08211
VNGRPLEMIEPR	0.9	63569000	75536000	51836000	15889000	0	10014000	83300	64	2	P62249
DNTQLLINQLWQLPTER	6.3	9995100	1347200	2241700	0	0	283530000	64111	64	2	Q15050
GYAFIEFASFEDAK	8.7	28027000	16171000	13103000	0	0	11008000	21851000	64	1	P19338
QEFMILPVGAANFR	1.8	6414200	19044000	9842100	0	41047	6781200	301670	64	2	P06733
TFNPGAGLPTDK	0.9	9701500	11828000	3951200	6572100	0	18999000	845120	64	1	P09661
VMVQPINLIFR	19.9	31633000	1622400	0	0	0	10814000	0	64	1	P62304
S(+42.01)ETAPAAPAAAPPAEK	2.7	278390000	267290000	127540000	59785000	13869000	9206000	11882000	64	2	P16403
GFEVVYMTEPIDEYC(+57.02)VQQLK	0.8	1951200	4798300	4957900	0	0	10879000	114130	64	2	P08238
ITGASLADIMAK	3.4	14408000	34702000	20467000	5350100	2716800	57457000	0	12.77	1	P83731
VVNVSSIMSVR	3.4	14408000	34702000	20467000	5350100	2716800	36397000	246050	12.77	1	P16152
ELQELVQYPVEHPDK	7.9	32279000	56947000	28634000	14520000	42339000	914320	3901400	3.92	2	P55072
DVTYEEAK	6.6	4542000	11440000	4872700	0	0	29794000	0	64	1	P61106
YFPTQALNFAFK	1.8	139080000	1802700	1761400	679920	253650	2594600	0	64	1	P05141
VGQDPVLR	1.1	18581000	15413000	9029700	5805100	0	14305000	696640	64	1	Q04837
QLPLVKPYLR	1.2	13956000	13785000	9051500	0	0	5851700	0	64	2	Q00610
A(+42.01)EQEPTAEQLAQIAAENEEDEHSVNYKPPAQK	1.1	130080000	204780000	198590000	8407500	173210000	15480000	8710800	24.36	2	P52565
ADEGISFR	1.2	76913000	172070000	100150000	25512000	2785700	7447700	17989000	61.77	1	Q06830
LDIDSPPITAR	4.4	196470000	374010000	246870000	141740000	44835000	8116000	43115000	8.34	2	P14618
MSVQPTVSLGGFEITPPVVLR	2	780060000	6307100	24276000	0	0	21377000	0	64	2	P06748
IPWTAASSQLK	0.9	11202000	29906000	13519000	5314600	1836600	187450000	2763800	16.28	1	Q9GZT3
GTIEILSDVQLIK	1.7	60968000	838260	939620	0	0	171650000	11617000	64	1	P05388
ALSADQGSYR	1.8	7340500	9711800	7059700	12660000	4567700	2736700	66080	4.68	1	Q9P2B2
TC(+57.02)TTVAFTQVNSEDKGALAK	0.8	35030000	92838000	62108000	11938000	0	154610000	31720	64	2	P62424
VSDTVVEPYNATLSVH	0.7	30155000	63048000	23669000	48522000	14108000	137550000	18556000	44.15	2	P07437
ENQTAVDVFR	5.6	9702300	2093600	28305000	5569100	5909500	15486000	1019200	13.52	1	Q15382
A(+42.01)SGVQVADEVC(+57.02)R	2.4	6159500	16107000	8020600	2982900	0	15486000	227010	64	1	P60981
NILSSADYVER	7.2	24348000	61771000	32697000	18581000	3392800	416250000	1295500	18.21	1	Q12846
SYYQSSVQYLYR	0.4	2906600	2348500	4855700	1858000	3419200	11823000	0	2.61	1	Q86Y56
ESQAVVDPPQAASTGAPQSSAVAAAAATTTATTTTTSSGGHPLEFLR	1.3	8367200	25598000	16238000	0	0	45344000	0	64	2	P54727
LMELHGEGSSSGK	1.2	101040000	39043000	19528000	7976100	0	168880000	10976000	64	2	P61247
A(+42.01)ASAAAASAAAASAASGSPGPGEGSAGGEKR	0.7	54446000	52966000	58174000	43201000	57018000	15219000	823920	1.41	3	Q13263
VAPAPAVVKK	0.9	3210500	3954000	2789400	3061700	0	30063000	0	64	1	P62424
IDSIPHLNNSTPLVDPSVYGYGVQK	1.9	9836600	9769000	5696200	0	0	16236000	11344000	64	1	Q96I24
FLEQQNQVLQTK	1.5	25965000	16942000	25144000	0	0	18164000	92821000	64	1	P04264
ESSETPDQFMTADETR	0.8	20922000	15362000	8050900	3603200	0	9214500	4021400	64	1	P16070
LSAMLVPVTPEVKPK	0.8	13132000	24859000	17488000	6494600	8168200	85993000	0	3.83	2	P82970
FGGNPGGFGNQGGFGNSR	1	12856000	11206000	8910600	6608300	4186900	35022000	0	7.97	1	Q13148
VFGNEIK	2.2	38185000	31067000	10317000	0	0	411420000	843840	64	1	P19338
LLMSEDYFTQAMEVK	7.4	7740100	509370	1062400	0	0	36843000	0	64	1	P42704
ELISNASDALEK	11.8	14964000	15510000	28133000	12441000	281300	6055400	183390	64	1	Q12931
MGGGGAMNMGDPYGSGGQK	1.3	27613000	19694000	8053700	0	0	11544000	0	64	1	P23246
GASQAGMTGYGMPR	1	27951000	36598000	40052000	14508000	10960000	5694200	477910	3.65	1	P37802
IEFVVVGPEAPLAAGIVGNLR	3.9	481760	513150	1044300	0	0	8365300	210880	64	1	P22102
EAVLLLK	1.2	27117000	21641000	9702500	4025800	1227800	424300000	2532100	64	1	P36578
PVIVEPLEQLDDEDGLPEK	1.5	19268000	21679000	5055800	0	0	17154000	0	64	2	P23246
SVPHLQK	1.3	4013100	11124000	8205200	0	0	7520500	0	64	1	P07355
VALRGEDVPLTEQTVSQVLQSAK	2.2	5685600	5733100	5822800	0	0	151320000	982930	64	1	P61923
VETGVLKPGMVVT	3	13601000	12454000	14515000	19049000	17789000	221090000	1256900	4.54	1	P68104
EVMLVGIGDKIR	3	13601000	12454000	14515000	19049000	17789000	59975000	1256900	4.54	1	P36542
NLQNLLILTAIK	2.8	7435700	976830	0	0	0	130900000	910790	64	1	Q00610
A(+42.01)DDPSAADRNVEIWK	0.9	9703200	7603300	11063000	5715100	3550500	25740000	299590	5.8	1	P62495
EVQDGIAPR	5.1	2342100	2296400	4663100	1518500	2507400	54417000	115100	6.43	1	P45974
DVQEIFR	1	12688000	30988000	5710900	1490400	0	1630700000	4437500	64	1	Q13838
GYISPYFINTSK	6.2	150540000	6518300	4400100	1295000	3558500	4015900	3064500	64	1	P10809
QVTQPTVGMNFK	5.3	104280000	3672200	6628100	2293800	1820200	11820000	1167500	64	1	P08708
QGGLGPMNIPLVSDPKR	0.8	67178000	114360000	95667000	16882000	20957000	174620000	0	6.77	2	Q06830
QQYESVAAK	2.3	28266000	5463000	2061500	0	0	31499000	7193200	64	1	P08670
LEQDEYALR	4.6	17450000	2507400	31781000	8833400	10744000	2534400	1151500	13.31	1	P55084
GLEGERPAR	4.8	5059700	2296400	4663100	10471000	5321400	2288100	0	4.56	1	P46783
DLRPVDNR	4.8	5059700	2296400	4663100	10471000	5321400	64502000	0	4.56	1	P42285
LPIPRPGEVLGLVGTNGIGK	0.6	668160	1368500	1972300	0	0	3261200	0	64	1	P61221
VERADGYEPPVQESV	1	12544000	2578400	6226600	10282000	4195100	19364000	0	15.3	1	P61247
TIAPALVSK	1.1	42492000	99821000	80471000	24409000	2976500	154390000	102170000	33.54	1	P06733
SAMPFTASPASSTTAR	1	4739100	6745800	6381800	3985500	2581300	4744200	0	2.61	1	O00151
S(+42.01)FDPNLLHNNGHNGYPNGTSAALR	9.3	11346000	10708000	5720500	0	0	27455000	0	64	1	O75534
GNPTVEVDLFTSK	2.9	58495000	32617000	36413000	1473600	925530	1305500	70981000	64	1	P06733
SGGGGGGGLGSGGSIR	1.4	10866000	11495000	19748000	11667000	0	6097100	25924000	64	1	P35527
LLEDGEDFNLGDALDSSNSMQTIQK	1.6	223880000	41352000	56726000	0	0	7617500	45784000	64	2	P05783
VETGVLKPGMVVTFAPVNVTTEVK	1.2	905140000	294150000	815110000	2169400	3197300	13243000	233480000	64	3	P68104
TTGIVMDSGDGVTHTVP	2.2	18128000	41843000	21767000	15620000	6771200	13198000	659570	9.02	1	P60709
QVEVELLSR	4.1	10186000	14724000	10915000	0	0	27017000	2705200	64	1	Q96G23
DGKLVSESSDVLPK	1.1	91656000	6192000	44311000	143210000	186570000	58766000	4480800	30.13	2	P05787
LDTDDLDEIEK	0.7	5028500	12151000	7299100	0	0	31057000	1510800	64	1	Q9NUU7
EGVHGGLINK	1	7754200	28151000	4867600	0	0	234660000	12468000	64	2	P07737
AQHEDQVEQYKK	1	9327900	29917000	9852600	2229500	0	27083000	324630	64	3	P02545
QIMENAEINNIIK	1.1	10650000	4647600	2036300	13186000	3951200	10776000	0	14.45	1	P11388
STVALTAAR	4.5	26291000	75568000	25446000	22140000	2783800	205560000	0	27.15	1	Q9H0A0
S(+42.01)ETAPAAPAAAPPAEKAPVKKK	0.6	128580000	8526100	19401000	238790000	376200000	184370000	0	64	3	P16403
QGGLGPMNIPLVS	1	302830	403970	963400	0	146800	142420000	0	64	1	Q06830
TTGIVMDSGDGVTHTVPIYEGYALP	4	1977500	4041500	4299500	0	0	8065600	699130	64	1	P60709
FVDLEPTVIDEVR	2.4	40236000	147730000	8152700	27906000	15544000	26386000	559350	64	2	Q9BQE3
VPTLAVPAISLPDDVR	1.3	1414700	1943600	838900	0	0	3405600	0	64	1	P26358
STAGDTHLGGEDFDNR	1.5	81970000	44055000	16528000	4590700	0	6890700	51262000	64	2	P11142
S(+42.01)ETAPAAPAAPAPAEK	3	318440000	294050000	157700000	59785000	13869000	14425000	27193000	64	2	P10412
LPEDPLLSGLLDSPALK	1.8	18140000	6586100	4615800	0	0	8176800	0	64	2	P49327
VATIQQC(+57.02)QSPTNYLQGLDGKPIIAAPVFTK	0.7	766680	1747600	2085800	0	0	24743000	0	64	1	Q86TC9
IEPPGLFR	1.1	9637100	6943700	2667100	0	0	252170000	0	64	1	P11387
VGDAIPAVEVFEGEPGNKVNLAELFK	2.3	10275000	0	8680200	0	0	169780000	0	64	1	P30044
QEPLGSDSEGVNC(+57.02)LAYDEAIMAQQDR	1.1	1428800	3639600	3504600	0	0	413020000	0	64	1	Q96FW1
ELPSFLGK	1.2	136980000	213940000	61503000	10025000	1293100	268930000	4516000	64	1	P26447
YLNIFGESQPNPK	8.5	27847000	748800	68449000	31090000	12698000	287510000	17117000	64	1	Q9UJS0
TEWLDGK	1.4	58489000	78289000	32501000	2559600	0	29343000	66787000	64	1	P62937
LQDEIQNMKEEMAR	1.3	171050000	141770000	71184000	3521500	0	3189100	0	64	2	P08670
GLALALFGGEPK	2	12623000	5000200	2032700	0	0	14644000	0	64	1	P49736
SLGSSFGSGAGSSSFSR	0.9	22497000	28509000	18529000	33039000	29089000	120750000	1562800	9.96	2	P05787
ENSTHFSQPNSTK	4.4	7910900	11269000	14247000	11126000	0	11668000	990410	64	2	Q06787
YSQKEDKYEEEIK	4.3	46487000	32196000	12210000	52518000	20518000	259850000	288270	9.42	3	P06753
HTGPGILSMANAGPNTNGSQFFIC(+57.02)TAK	0.7	73526000	213830000	148530000	391210	243100	134350000	0	64	3	P62937
NSNLVGAAHEELQQSR	1.3	96750000	114260000	70749000	48385000	1832200	2068600	9405000	64	2	P02545
TTLVIMER	1.9	4825300	6817600	2170900	0	0	13083000	1079700	64	1	Q14974
TNQIGTVNDR	13.6	5963000	12358000	10502000	4338200	0	30570000	891890	64	1	P53990
VAPEEHPVLLT	5	12950000	16415000	11200000	13890000	19660000	31181000	0	5.49	1	P60709
AVNTAQGLFQR	5	12950000	16415000	11200000	13890000	19660000	8908000	780720	5.49	1	O43752
VSSAEGAAKEEPK	0.6	3886900	4491700	3367300	2120700	0	222740000	400550	64	2	P05114
FVIKPIDKK	1.6	14071000	33408000	13637000	0	0	653710000	0	64	1	P26038
NGSEADIDEGLYSR	1.2	14257000	25627000	19034000	13888000	7807000	122240000	895780	5.2	1	P22314
EINPDHPIVETLR	4.7	10864000	14540000	12896000	11315000	8347700	122240000	1792400	2.01	2	P08238
VLAQNSGFDLQETLVK	1.1	17973000	19806000	9769500	0	0	1080200000	8318200	64	2	P40227
LASVPAGGAVAVSAAPGSAAPAAGSAPAAAEEK	1.4	139220000	105710000	66261000	3174700	320620	1687700	54496000	64	3	P05387
SLPLPNFSSLNLR	1	7778600	25716000	10948000	716340	64924	27113000	0	64	2	P08670
LAEVEAALEK	7.2	40379000	65669000	66084000	37897000	6590200	6134800	1512000	10.03	1	Q15149
LIEVDDERK	5.2	7362200	9953900	4366600	0	0	26029000	795100	64	1	P62753
EYTINIHK	2.2	20637000	13930000	4657500	0	0	3231200	1478000	64	1	P62899
VIISAPSADAPMFVMGVNHEKYDNSLK	2.3	115120000	62461000	164720000	0	0	50691000	0	64	2	P04406
AVSEEQQPALK	0.7	7306100	6570400	2920500	0	0	142350000	968830	64	1	Q8NE71
GDEAQSKR	4	3050600	5550400	3867500	3024100	0	61529000	415250	64	1	P60709
TFAPVNVTTEVK	6.7	11844000	20867000	26690000	8005500	1500700	16690000	4568000	17.79	1	P68104
IEDFLER	1.2	39657000	19270000	2806900	0	0	105850000	0	64	1	P46781
QDAQSLHGDIPQK	1.2	15759000	25174000	8479300	0	0	574610000	4900100	64	2	Q9NR30
A(+42.01)ERPEDLNLPNAVITR	1	10321000	15910000	8455300	3560000	4014200	24328000	666570	5.52	2	Q9NRF9
VSELKEELKK	1	17214000	34222000	16566000	12796000	0	23341000	75311	64	2	Q00839
TTSGYAGGLSSAYGGLTSPGLS	5.7	10498000	17616000	7695400	3319500	15830000	247390000	0	5.31	2	P05787
GLAPDLPEDLYHLIKK	2	71839000	14244000	21871000	27137	0	375540000	0	64	3	P62277
QLVEQVEQIQK	5	14544000	17938000	10719000	635040	0	26195000	1087100	64	1	Q9BVK6
DLYANTVLSGGTTMYPGIADR	4.8	453210000	166830000	257080000	0	67135	2186000000	274650000	64	2	P60709
SLGSVQAPSYGARPVSSAASVYAGAGGSGSR	0.9	282570000	9886300	53255000	5983700	63985000	43721000	184920	64	2	P05783
DAGVIAGLNVLR	1.3	37414000	3139000	0	0	0	32319000	10875000	64	1	P0DMV8
GGAAPEGPNEAEVTSGKPEQEVPDAEEEKSVSGTDVQEEC(+57.02)R	0.8	1465900	4072500	3257200	0	0	90036000	0	64	1	P49321
AVFVDLEPTVIDE	1.6	1123700	1802700	1761400	679920	1277200	22930000	0	18.52	1	Q9BQE3
LEVQATDREENK	9.6	13200000	19851000	12548000	2695800	0	11919000	734970	64	2	P11387
MTLDTLSIYETPSMGLLDKK	0.2	3723700	2004200	3920700	0	0	164420000	0	64	1	P55884
KATVNLLGEEK	7.1	3996100	7020500	2138600	0	0	42181000	4660800	64	1	Q00765
SSSSQVVGPVQEEEYVAEKLPSR	1.9	3747500	6015800	2347900	0	0	6335300	0	64	1	Q92667
AELEQLKGQGK	1	2439400	1580400	2488100	3532000	554950	2104600	0	7.28	1	P08670
IRDWYQR	0.7	6899200	10638000	4923100	0	0	5967900	0	64	1	Q04695
LAQEGIYTLYPFINSR	6.5	14978000	20487000	16239000	0	0	1094700	652020	64	2	Q08J23
GAEIEYAMAYSK	4.2	7323800	16107000	8020600	2982900	0	2163200	177700	64	1	Q969H8
IILDLISESPIK	1.3	59523000	6901700	985390	0	0	2146200000	20232000	64	1	P61978
MQQQLDEYQELLDIK	1.8	62078000	34805000	8710400	0	0	352970000	15797000	64	2	P02545
LALDMEIHAYR	6.3	30964000	14261000	11095000	41004000	26836000	43305000	3990600	5.55	2	P02545
QGQGQSEPGEYEQR	15.1	3942300	4169700	3202100	9054900	0	4291500	126120	64	1	P43121
V(+42.01)EADRPGK	1.4	24501000	22079000	10834000	0	0	12482000	2894500	64	1	P38159
ADDGRPFPQVIK	0.7	82581000	187610000	117560000	11368000	0	10839000	12762000	64	2	P04075
GISLNPEQWSQLK	1.8	21409000	15224000	6178800	0	0	48127000	2146900	64	1	P53999
KDDEVQVVR	6.9	24563000	25236000	10473000	3709400	2768000	4849800	4332100	29.13	2	P61254
EAMEDGEIDGNK	2.1	8696200	7021600	0	0	0	1156500000	6586000	64	1	P19338
HLEINPDHPIVETLR	0.7	349600000	591430000	466280000	229910000	199650000	6563400	100180000	2.96	3	P08238
LDPSIFESLQK	2	8174900	7947400	1879200	0	0	57287000	1898200	64	1	Q9Y265
DIDIHEVR	1.5	69844000	83055000	43755000	11830000	0	11388000	5825200	64	2	Q00839
A(+42.01)SSDIQVKELEKRASGQAFELILSPR	19.6	26931000	129680000	4968700	0	0	155860000	356100	64	1	P16949
NTGIIC(+57.02)TIGPASR	7.1	138020000	291090000	162110000	140260000	74314000	8974200	0	13.04	2	P14618
VSSDVIDQK	1.1	5748000	5213000	12298000	4957800	0	37920000	1033500	64	1	Q9Y262
MEEGEVYAIETFGSTGK	11.2	3950400	5429500	3444300	0	0	10521000	0	64	1	P50579
GLLEFEHQR	1.1	76675000	145340000	84709000	71711000	55380000	14104000	404410	5.54	2	Q14697
VEALC(+57.02)AEHQINLIK	0.4	8286900	24287000	14851000	2296600	0	7504600	0	64	2	P25398
YFFTSVSRPGR	8.7	8576400	20703000	6832000	1604500	4027700	15728000	3203100	12.9	1	P04439
WEVADLQPQLK	2.4	12956000	24452000	13936000	7465300	5070600	20279000	0	4.82	1	P22695
TVLSGGTTMYPGIADR	0.8	6749600	11055000	7889800	2690500	7122900	70995000	87103000	4.11	1	P60709
SIQEELQQLR	3.4	18069000	36611000	12889000	5571600	2516800	27810000	832070	14.55	1	Q15149
NLEPEWAAAASEVK	2.1	19525000	10059000	2738400	0	0	17273000	0	64	1	Q15084
QPYAVSELAGHQTSAESWGTGR	1.3	119890000	83911000	56835000	0	897870	89927000	10614000	64	2	P36578
HTDDELNWLDHGR	1	2048000	3936400	3252000	2253800	797880	8050200	90438	64	1	Q9Y490
VNSKFDTIYQILLK	7.6	2255700	4286100	2837900	0	0	31770000	0	64	1	Q14258
MAIQTQQSK	5.3	9421300	5422200	1917300	24281000	5389100	3511800	2779800	12.66	1	O96008
A(+42.01)QQAADKYLYVDK	0.7	2378200	6084600	2377500	0	0	10635000	953590	64	1	P35579
TEADAEKTFEEK	1.3	35981000	33112000	22286000	398470	0	72116000	844120	64	2	P19338
AALNPESNTAGLDIFAK	4.9	6492000	14169000	11829000	3668400	0	114540000	8302300	64	1	O00299
INVYYNEATGGK	1.9	118420000	45438000	27916000	12631000	1475600	7932700	14002000	64	1	P68371
AAFTAFEEAQLPR	10.9	7816400	5332700	2323100	0	0	150190000	0	64	1	Q96CT7
YVGDEAQSKR	1.3	3728500	6369800	4852500	3188700	0	45959000	1433100	64	1	P60709
SLLQPLNVEIDPEIQK	0.6	689780	1557200	1335200	556550	0	192090000	0	64	1	P04264
AAAPAPEEEMDEC(+57.02)EQALAAEPK	0.8	18799000	44505000	31539000	10666000	7287400	77305000	0	64	2	P26641
AGLAMPGPPLGPVLGQR	14.1	4705600	1028100	0	0	0	2252800	2315800	64	1	Q9Y3B7
NQKDPGVLDR	1.2	60131000	24261000	27993000	13911000	238550	10899000	295420	64	2	P31949
VSLGGFEITPPVVLR	0.8	289690	242350	824310	0	381800	16207000	0	64	1	P06748
ALAAAGYDVEK	1.1	437660000	24412000	15868000	3171400	0	497040000	27861000	64	1	P10412
ALADDDFLTVTGK	1.2	10994000	13895000	6751300	1763100	0	35822000	0	64	1	P33991
SPISVPGGSALISNLGK	0.9	3027700	6520300	3936800	1291700	459570	20064000	0	14.19	1	P51610
SPAGLQVLNDYLADK	1.9	34061000	74853000	31914000	0	0	15241000	15091000	64	1	P24534
EHYLEDILAK	5	12777000	26965000	18115000	5046300	9590100	17075000	1365800	6.47	1	Q7L2E3
IGGGIDVPVPR	2	9204300	13724000	11062000	6686500	2219900	9673100	2316100	6.18	1	Q92945
QEDKDDLDVTELTNEDLLDQLVK	1.9	10852000	369360	1152100	0	0	2559700	0	64	1	P42167
A(+42.01)TTATMATSGSAR	1	24438000	19480000	15237000	5194600	1794400	390550000	1558300	44.85	1	P38919
SLQSVAEER	3.7	61894000	21288000	8892100	3631000	589880	35528000	5569400	64	1	P61313
GQILTMANPIIGNGGAPDTTALDELGLSK	1.6	17643000	635180	3425300	0	0	5198000	1213200	64	1	P31327
GFVEPDHYVVVGAQR	7.3	45701000	18248000	19167000	7673800	20436000	44678000	226770	21.24	2	P02786
SAQAFTHLK	8.6	8263000	19639000	9321800	4357100	1512600	56101000	0	12.98	1	Q9UBU9
QMVIDVLHPGK	1.3	36374000	28836000	24901000	3828500	0	11005000	8578800	64	2	P62847
IYAPQGLLLTDPIER	6.6	3934300	8747700	4864200	1096000	320420	40305000	0	27.3	2	Q7Z5G4
VSFELFADKVPK	1.6	250710000	115730000	39114000	1690700	0	144710000	243850	64	2	P62937
AAYFGIYDTAK	1	12104000	3616500	1795300	0	0	8078100	2339300	64	1	P05141
MQQENMKPQEQLTLEPYER	1	22777000	22439000	17665000	0	0	36085000	0	64	2	P22087
ESYVETELIFALAK	12.4	22819000	52530000	38807000	0	0	9305000	1724200	64	1	Q00610
QRVEHFLEQR	9.6	5855000	14435000	9215900	2081800	0	9786500	0	64	1	Q96HR9
LLFPAVDDNLLK	9.9	2604300	2267600	2087400	0	0	10286000	0	64	1	Q02880
GALALIYNEALKG	0.5	1191100	1302500	3932300	0	720700	14249000	0	64	1	P06703
PHSHTKPYVR	9.7	1750900	6715900	1418800	0	0	3534000	80660	64	1	Q07020
EIDGGLETLR	6	13668000	11751000	13251000	14255000	10247000	1724400	0	1.84	1	P38117
SLLVIPNTLAVNAAQDSTDLVAK	1.8	13063000	9140000	15439000	0	0	19074000	0	64	2	P17987
DISEASVFDAYVLPK	0.9	71680000	24739000	17279000	310350	36658	30938000	9597000	64	2	P62854
VNFLPEIITLSK	1.9	2177900	2811100	1048100	0	0	63699000	438420	64	1	Q14204
VQTPEVDVK	14.5	10467000	22226000	12319000	7729200	2268500	19808000	3103400	9.8	1	Q09666
AQQELEEQTR	1.2	2423600	6490800	1684100	0	0	68173000	4268400	64	1	P26038
AQPAQPADEPAEKADEPMEH	0.8	19591000	25186000	22245000	19049000	17411000	2484200	318220	1.79	2	P25786
ATEGKWEVLIGSSHILTPTR	4.4	6682800	14345000	10001000	1880300	5266600	58389000	0	7.63	1	Q15833
TKDGVVEITGK	2	16475000	26253000	11306000	476470	0	37340000	1775500	64	2	P04792
A(+42.01)DGQVAELLLR	1	4513800	4204000	1495400	304230	63968	3742600	269160	64	1	Q9Y285
IDESSLTGESDHVKK	1.8	20431000	44189000	31562000	10516000	3673800	17813000	174470	12.03	1	P23634
DRPFFPGLVK	5.1	118130000	335340000	144520000	4694600	3489600	14988000	22368000	64	2	P22392
VGQLSEGAIAAIMQK	14.6	3748400	4410200	3235300	0	0	15861000	0	64	1	P27694
IAQLEEELEEEQGNTELINDR	0.6	6528500	17623000	11608000	0	0	50615000	0	64	2	P35579
GAFIDQSQSLNIHIAEPNYGK	5.8	2304400	2169500	3404300	0	0	248320	166830	64	1	P23921
QLQAETEPIVK	1.1	6836300	13049000	7011100	4711900	0	91907000	495830	64	1	P60228
YGINTTDIFQTVDLWEGK	8.7	11947000	3425700	2872300	0	0	178490000	107860	64	2	P37802
M(+42.01)DKNELVQK	1.3	40934000	80559000	40708000	12334000	1066200	77752000	3807200	64	1	P63104
DLYEDELVPLFEK	2.7	27449000	1468900	1325600	0	0	26152000	4344000	64	1	O43390
VAEIEHAEKEK	0.7	1694900	3188000	2219000	2180500	0	23328000	8608.6	64	1	P78371
T(+42.01)EWETAAPAVAETPDIKLFGK	1	493000	364130	1504000	95832	501060	75038000	1141700	64	2	P46782
YSQLVVETIR	4.5	33179000	47450000	15749000	5635100	6151800	538340000	16249000	16.13	1	Q92522
ASGNYATVISHNPETK	1	109970000	92531000	55635000	37542000	9937700	73931000	16661000	35.64	2	P62917
ISLGMPVGPNAHK	1.2	7370600	9758700	4946100	1235000	0	117170000	2018800	64	2	Q13435
NQGGYGGSSSSSSYGSGR	1	88983000	21670000	8231800	5611200	1584400	6217000	9569600	64	1	P09651
YNFPVEVEVPMER	9.6	12844000	35859000	3964900	0	0	6217000	9368700	64	1	P78527
A(+42.01)DDLDFETGDAGASATFPMQC(+57.02)SALR	1.2	6970500	8818000	26035000	0	0	26485000	0	64	2	P63241
QGGGGGGGSVPGIER	0.5	31002000	17445000	11715000	11753000	8696000	51424000	2576800	12.12	1	P52272
LVPLLDTGDIIIDGGNSEYR	1.9	2424400	3002200	2907500	0	0	9831800	5877400	64	2	P52209
AEPPKAPEQEQAAPGPAAGGEAPK	1.2	216110000	164690000	104820000	24856000	5141000	37340000	869110	64	2	P80723
VAPEEHPVLLTEAPLNPKANR	1.1	59275000	0	7271900	101300000	187800000	354640000	0	64	3	P60709
EVVEEAENGR	2.2	44858000	90459000	44611000	5655600	0	20278000	21278000	64	2	P06454
TGTLQPWNSDSTLNSR	11.7	6658600	10689000	8179400	6234100	4988500	22776000	1105800	3.34	1	Q9H0H5
QLDFNSSK	1.2	2617200	4392500	2551200	1479600	0	22408000	0	64	1	P53621
IYPEEMIQTGISAIDGMNSIAR	10.4	1340700	0	412630	0	550130	583220000	17988000	64	1	P21281
DKTIIMWK	7.4	17717000	18570000	14831000	2204900	2302400	239580	4968300	22.98	1	P63244
TKPIWTR	6.3	55747000	83532000	43833000	0	0	10784000	12155000	64	2	P08238
NFDEILR	1.2	11722000	30988000	11507000	1490400	0	544310000	0	64	1	P30041
TVINFTMPNTIK	1.4	5644200	2280200	737780	0	0	35851000	1737800	64	1	Q96GQ7
ILPQYIFNSRDPIVMGVTVEAGQVK	9	6747200	13024000	3371400	0	0	45626000	46692	64	1	O60841
DGQAMLWDLNEGK	1.7	54080000	44717000	18454000	0	0	9666600	15222000	64	1	P63244
MIQDGKGDVTITNDGATILK	1.4	20073000	23369000	27469000	0	0	22035000	0	64	2	P50991
PIEHGIITNWDDMEK	4.9	167190000	117860000	78089000	0	0	4336800	3730700	64	2	P68032
GTDVNVFNTILTTR	1	29236000	20353000	12881000	527180	0	4277400	20339000	64	1	P04083
GVAINMVTEEDKR	1.9	24977000	46246000	26963000	6247900	7843300	319420000	8221600	7.4	2	P60842
FPVAPLIPYPLITK	2	685290	1139300	982000	0	0	17365000	150710	64	1	P49756
VGEIFSAAGAAFTK	1.4	852150	1165600	400980	0	0	4176500	0	64	1	Q8IXM2
QVSDLISVLR	1.3	20146000	12270000	5016000	1440600	0	45885000	0	64	1	P17844
FMLVLASNQPEQFDWAINDR	0.6	1686100	1915800	2924300	0	0	23167000	0	64	1	Q9NVI7
DGQILPVPNVVVR	0.6	5534900	5526300	1851600	0	0	2250800	0	64	1	Q9P258
YDPEAASAPGSGNPC(+57.02)HEASAAQKENAGEDPGLAR	0.3	6750900	0	5176400	17131000	11447000	5541900	0	64	2	P81605
VREEEIEVDSR	3.2	22422000	22390000	11832000	8807100	3232000	553410000	1636200	20.37	2	Q14978
EAFQSVVLPAFEK	3.4	1815200	2110300	822110	0	0	384950000	202360	64	1	Q6P2E9
[truncated: 27,678 more rows]

## Sheet: 100cells-PG(ratio and time)
Accession	Coverage (%)	#Peptides	#Unique	PTM	sample-2h	sample-4h	sample-8h	sample-12h	sample- 1:1	sample-1：10	sample-5：1	sample-10：1	Avg. Mass	Description
[truncated: 2,984 more rows]

[truncated: 3 more sheets: 100cells-peptide(ratio and time, 10cells-PG(ratio), 10cells-peptide（(ratio)）]
