# Supplementary material for: An angled-shape tip-based strategy for highly sensitive proteomic profiling of a low number of cells
Source: Royal Society of Chemistry journal article supplement (doi:10.1039/d2ay01884e), 2023-01-01
Supplement: d2ay01884e3.xlsx [file d2ay01884e3.xlsx]

## Sheet: BSA-angled-tip-1000cells-PG
Accession	Coverage (%)	#Peptides	#Unique	PTM	Sample 1 Area	Sample 2 Area	Sample 3 Area	Avg. Mass	Description
P31943	50	28	19	Oxidation (M); Acetylation (Protein N-term)	341750000	231740000	398750000	49229	Heterogeneous nuclear ribonucleoprotein H OS=Homo sapiens OX=9606 GN=HNRNPH1 PE=1 SV=4
P61803	28	3	3	Acetylation (Protein N-term)	38748000	166110000	8563300	12497	Dolichyl-diphosphooligosaccharide--protein glycosyltransferase subunit DAD1 OS=Homo sapiens OX=9606 GN=DAD1 PE=1 SV=3
Q9BTC0	16	22	22	Acetylation (Protein N-term)	24971000	34120000	232150000	243870	Death-inducer obliterator 1 OS=Homo sapiens OX=9606 GN=DIDO1 PE=1 SV=5
Q9ULX6	12	6	6		19414000	74447000	11785000	71640	A-kinase anchor protein 8-like OS=Homo sapiens OX=9606 GN=AKAP8L PE=1 SV=4
Q7Z460	10	11	10		9161600	80273000	10709000	169450	CLIP-associating protein 1 OS=Homo sapiens OX=9606 GN=CLASP1 PE=1 SV=1
P07099	18	8	8		38745000	29305000	12669000	52949	Epoxide hydrolase 1 OS=Homo sapiens OX=9606 GN=EPHX1 PE=1 SV=1
Q6P996	25	13	13		77709000	38890000	128260000	86707	Pyridoxal-dependent decarboxylase domain-containing protein 1 OS=Homo sapiens OX=9606 GN=PDXDC1 PE=1 SV=2
O75531	52	5	5	Oxidation (M)	195260000	93758000	303500000	10059	Barrier-to-autointegration factor OS=Homo sapiens OX=9606 GN=BANF1 PE=1 SV=1
O15020	10	16	10		12979000	8413500	47883000	271323	Spectrin beta chain non-erythrocytic 2 OS=Homo sapiens OX=9606 GN=SPTBN2 PE=1 SV=3
Q99459	53	30	30		99394000	343350000	208160000	92251	Cell division cycle 5-like protein OS=Homo sapiens OX=9606 GN=CDC5L PE=1 SV=2
Q9H1I8	7	3	3		3965400	1580500	43052000	86360	Activating signal cointegrator 1 complex subunit 2 OS=Homo sapiens OX=9606 GN=ASCC2 PE=1 SV=3
Q9BYD3	50	9	9		48254000	58905000	12322000	34919	39S ribosomal protein L4 mitochondrial OS=Homo sapiens OX=9606 GN=MRPL4 PE=1 SV=1
Q6NUM9	9	4	4		2125600	351990	3263400	66820	All-trans-retinol 13 14-reductase OS=Homo sapiens OX=9606 GN=RETSAT PE=1 SV=2
Q13868	40	8	8	Oxidation (M)	23715000	36590000	126320000	32789	Exosome complex component RRP4 OS=Homo sapiens OX=9606 GN=EXOSC2 PE=1 SV=2
O00461	12	6	6		27849000	62073000	6598100	81880	Golgi integral membrane protein 4 OS=Homo sapiens OX=9606 GN=GOLIM4 PE=1 SV=1
Q9Y547	28	3	3		25825000	843760	9214300	16297	Intraflagellar transport protein 25 homolog OS=Homo sapiens OX=9606 GN=HSPB11 PE=1 SV=1
Q92576	7	7	7		11413000	5306900	30287000	229479	PHD finger protein 3 OS=Homo sapiens OX=9606 GN=PHF3 PE=1 SV=3
Q9UNK0	11	2	2		12343000	3662900	18317000	26907	Syntaxin-8 OS=Homo sapiens OX=9606 GN=STX8 PE=1 SV=2
P82675	11	3	3		3090800	170290	4556500	48007	28S ribosomal protein S5 mitochondrial OS=Homo sapiens OX=9606 GN=MRPS5 PE=1 SV=2
Q9BXS5	30	9	9	Acetylation (Protein N-term)	13149000	11782000	18606000	48587	AP-1 complex subunit mu-1 OS=Homo sapiens OX=9606 GN=AP1M1 PE=1 SV=3
Q96T23	7	7	7		2480400	5384100	19303000	163820	Remodeling and spacing factor 1 OS=Homo sapiens OX=9606 GN=RSF1 PE=1 SV=2
P51659	40	23	23		52033000	73446000	56593000	79686	Peroxisomal multifunctional enzyme type 2 OS=Homo sapiens OX=9606 GN=HSD17B4 PE=1 SV=3
Q9Y6M7	3	2	2		897920	0	263340	136044	Sodium bicarbonate cotransporter 3 OS=Homo sapiens OX=9606 GN=SLC4A7 PE=1 SV=2
O95602	13	11	11		9867100	7697300	23687000	194810	DNA-directed RNA polymerase I subunit RPA1 OS=Homo sapiens OX=9606 GN=POLR1A PE=1 SV=2
Q9NTX5	25	5	5		6432900	10820000	2923400	33698	Ethylmalonyl-CoA decarboxylase OS=Homo sapiens OX=9606 GN=ECHDC1 PE=1 SV=2
P07919	29	2	2		21941000	1089000	6564700	10739	Cytochrome b-c1 complex subunit 6 mitochondrial OS=Homo sapiens OX=9606 GN=UQCRH PE=1 SV=2
A0A096LP55	29	2	2		21941000	1089000	6564700	10752	Cytochrome b-c1 complex subunit 6-like mitochondrial OS=Homo sapiens OX=9606 GN=UQCRHL PE=3 SV=1
Q14676	15	14	14		21629000	21450000	44209000	226664	Mediator of DNA damage checkpoint protein 1 OS=Homo sapiens OX=9606 GN=MDC1 PE=1 SV=3
P43003	9	3	3		5146100	1697500	8212600	59572	Excitatory amino acid transporter 1 OS=Homo sapiens OX=9606 GN=SLC1A3 PE=1 SV=1
Q9BU89	17	3	3	Oxidation (M); Acetylation (Protein N-term)	2907100	676290	3745900	32904	Deoxyhypusine hydroxylase OS=Homo sapiens OX=9606 GN=DOHH PE=1 SV=1
Q9Y490	44	81	81		1200900000	708030000	501040000	269765	Talin-1 OS=Homo sapiens OX=9606 GN=TLN1 PE=1 SV=3
P78346	39	6	6		5611600	7188600	18262000	29321	Ribonuclease P protein subunit p30 OS=Homo sapiens OX=9606 GN=RPP30 PE=1 SV=1
P78347	42	40	40	Acetylation (Protein N-term)	281680000	483310000	275590000	112416	General transcription factor II-I OS=Homo sapiens OX=9606 GN=GTF2I PE=1 SV=2
O60508	11	4	4		1357200	437240	2956600	65521	Pre-mRNA-processing factor 17 OS=Homo sapiens OX=9606 GN=CDC40 PE=1 SV=1
P62328	89	11	10	Oxidation (M); Acetylation (Protein N-term)	1366000000	2370700000	2077000000	5053	Thymosin beta-4 OS=Homo sapiens OX=9606 GN=TMSB4X PE=1 SV=2
P00966	59	45	45		403650000	4876700000	4136400000	46530	Argininosuccinate synthase OS=Homo sapiens OX=9606 GN=ASS1 PE=1 SV=2
P02768	4	6	6		26634000	1191400000	1354200000	69367	Albumin OS=Homo sapiens OX=9606 GN=ALB PE=1 SV=2
Q8NFF5	13	4	4		45890	0	88381	65266	FAD synthase OS=Homo sapiens OX=9606 GN=FLAD1 PE=1 SV=1
O60826	12	4	4		2286400	3352900	14095000	70756	Coiled-coil domain-containing protein 22 OS=Homo sapiens OX=9606 GN=CCDC22 PE=1 SV=1
P05556	20	15	15		165690000	798870000	872430000	88415	Integrin beta-1 OS=Homo sapiens OX=9606 GN=ITGB1 PE=1 SV=2
Q9ULU4	5	3	3		330850	31447	0	131692	Protein kinase C-binding protein 1 OS=Homo sapiens OX=9606 GN=ZMYND8 PE=1 SV=2
P62805	62	42	42	Oxidation (M)	27720000000	5364700000	6295900000	11367	Histone H4 OS=Homo sapiens OX=9606 GN=H4C1 PE=1 SV=2
Q14241	15	8	8		14524000	10183000	3372800	89909	Elongin-A OS=Homo sapiens OX=9606 GN=ELOA PE=1 SV=2
P40616	34	4	4		216020000	3819700	13809000	20418	ADP-ribosylation factor-like protein 1 OS=Homo sapiens OX=9606 GN=ARL1 PE=1 SV=1
Q9Y697	28	9	9		23631000	25759000	83355000	50196	Cysteine desulfurase mitochondrial OS=Homo sapiens OX=9606 GN=NFS1 PE=1 SV=3
Q08380	18	7	7		9570100	69903000	183040000	65331	Galectin-3-binding protein OS=Homo sapiens OX=9606 GN=LGALS3BP PE=1 SV=1
Q5SW79	13	13	13	Acetylation (Protein N-term)	9561400	38617000	14034000	175292	Centrosomal protein of 170 kDa OS=Homo sapiens OX=9606 GN=CEP170 PE=1 SV=1
Q9BYD2	25	5	5		53194000	11917000	84502000	30243	39S ribosomal protein L9 mitochondrial OS=Homo sapiens OX=9606 GN=MRPL9 PE=1 SV=2
P55209	35	20	17	Oxidation (M); Acetylation (Protein N-term)	237890000	256950000	416870000	45374	Nucleosome assembly protein 1-like 1 OS=Homo sapiens OX=9606 GN=NAP1L1 PE=1 SV=1
Q14139	6	4	4		3922100	4761500	16384000	122560	Ubiquitin conjugation factor E4 A OS=Homo sapiens OX=9606 GN=UBE4A PE=1 SV=2
P61604	88	19	19		796790000	105100000	85240000	10932	10 kDa heat shock protein mitochondrial OS=Homo sapiens OX=9606 GN=HSPE1 PE=1 SV=2
P60174	64	21	21	Oxidation (M)	2076700000	212880000	640010000	26669	Triosephosphate isomerase OS=Homo sapiens OX=9606 GN=TPI1 PE=1 SV=4
Q96KQ7	4	2	2	Acetylation (Protein N-term)	2187400	531610	2296700	132370	Histone-lysine N-methyltransferase EHMT2 OS=Homo sapiens OX=9606 GN=EHMT2 PE=1 SV=3
Q9Y3A4	21	5	5		233360000	49442000	18062000	32334	Ribosomal RNA-processing protein 7 homolog A OS=Homo sapiens OX=9606 GN=RRP7A PE=1 SV=2
P12277	57	21	21	Oxidation (M)	327250000	1066900000	1627400000	42644	Creatine kinase B-type OS=Homo sapiens OX=9606 GN=CKB PE=1 SV=1
Q02818	31	11	10		111050000	38277000	198150000	53879	Nucleobindin-1 OS=Homo sapiens OX=9606 GN=NUCB1 PE=1 SV=4
Q13576	12	15	13		34189000	145570000	137170000	180577	Ras GTPase-activating-like protein IQGAP2 OS=Homo sapiens OX=9606 GN=IQGAP2 PE=1 SV=4
Q8IZ21	4	2	2		838270	35059000	32008000	78211	Phosphatase and actin regulator 4 OS=Homo sapiens OX=9606 GN=PHACTR4 PE=1 SV=1
Q01469	20	3	3	Acetylation (Protein N-term)	111170000	9136300	3129600	15164	Fatty acid-binding protein 5 OS=Homo sapiens OX=9606 GN=FABP5 PE=1 SV=3
Q99878	50	28	3		35387000	409540000	290970000	13936	Histone H2A type 1-J OS=Homo sapiens OX=9606 GN=H2AC14 PE=1 SV=3
Q96KK5	50	28	3		35387000	409540000	290970000	13906	Histone H2A type 1-H OS=Homo sapiens OX=9606 GN=H2AC12 PE=1 SV=3
Q9BTM1	50	28	3		35387000	409540000	290970000	14019	Histone H2A.J OS=Homo sapiens OX=9606 GN=H2AJ PE=1 SV=1
P20671	49	28	3		35387000	409540000	290970000	14107	Histone H2A type 1-D OS=Homo sapiens OX=9606 GN=H2AC7 PE=1 SV=2
P0C0S8	49	28	3		35387000	409540000	290970000	14091	Histone H2A type 1 OS=Homo sapiens OX=9606 GN=H2AC11 PE=1 SV=2
Q16777	50	28	3		35387000	409540000	290970000	13988	Histone H2A type 2-C OS=Homo sapiens OX=9606 GN=H2AC20 PE=1 SV=4
Q6FI13	49	28	3		35387000	409540000	290970000	14095	Histone H2A type 2-A OS=Homo sapiens OX=9606 GN=H2AC18 PE=1 SV=3
Q9NZB2	27	21	21	Oxidation (M)	62174000	1384100000	156640000	121888	Constitutive coactivator of PPAR-gamma-like protein 1 OS=Homo sapiens OX=9606 GN=FAM120A PE=1 SV=2
Q14847	60	20	20		260120000	700430000	668050000	29717	LIM and SH3 domain protein 1 OS=Homo sapiens OX=9606 GN=LASP1 PE=1 SV=2
Q92804	27	11	8		26042000	131020000	105170000	61830	TATA-binding protein-associated factor 2N OS=Homo sapiens OX=9606 GN=TAF15 PE=1 SV=1
Q9Y5J1	47	17	17		33369000	74666000	141180000	62004	U3 small nucleolar RNA-associated protein 18 homolog OS=Homo sapiens OX=9606 GN=UTP18 PE=1 SV=3
Q6P1M0	9	4	4		9545900	52749000	83386000	72064	Long-chain fatty acid transport protein 4 OS=Homo sapiens OX=9606 GN=SLC27A4 PE=1 SV=1
Q9Y2R4	32	12	12	Acetylation (Protein N-term)	34239000	16880000	95691000	67498	Probable ATP-dependent RNA helicase DDX52 OS=Homo sapiens OX=9606 GN=DDX52 PE=1 SV=3
Q7L2E3	33	28	28		79915000	230200000	203690000	133938	ATP-dependent RNA helicase DHX30 OS=Homo sapiens OX=9606 GN=DHX30 PE=1 SV=1
P27824	54	45	45	Oxidation (M)	465520000	1429200000	940890000	67568	Calnexin OS=Homo sapiens OX=9606 GN=CANX PE=1 SV=2
Q9UGR2	6	3	3		254620	284870	16227000	109858	Zinc finger CCCH domain-containing protein 7B OS=Homo sapiens OX=9606 GN=ZC3H7B PE=1 SV=2
O95376	7	2	2		3842100	292810	2627300	57819	E3 ubiquitin-protein ligase ARIH2 OS=Homo sapiens OX=9606 GN=ARIH2 PE=1 SV=1
Q9NY61	33	11	11	Acetylation (Protein N-term)	7185400	46621000	51910000	63133	Protein AATF OS=Homo sapiens OX=9606 GN=AATF PE=1 SV=1
Q8NCA5	36	10	7		23347000	113590000	132180000	55272	Protein FAM98A OS=Homo sapiens OX=9606 GN=FAM98A PE=1 SV=2
Q99956	18	4	4		113390000	7341400	9724100	41868	Dual specificity protein phosphatase 9 OS=Homo sapiens OX=9606 GN=DUSP9 PE=1 SV=1
P11182	15	5	5		1179500	17352	254740	53487	Lipoamide acyltransferase component of branched-chain alpha-keto acid dehydrogenase complex mitochondrial OS=Homo sapiens OX=9606 GN=DBT PE=1 SV=3
Q8IXM3	53	5	5	Oxidation (M)	5729700	30990000	43095000	15383	39S ribosomal protein L41 mitochondrial OS=Homo sapiens OX=9606 GN=MRPL41 PE=1 SV=1
O43795	16	15	14		29810000	99616000	77547000	131985	Unconventional myosin-Ib OS=Homo sapiens OX=9606 GN=MYO1B PE=1 SV=3
Q8WTT2	20	15	15		86106000	19733000	44980000	92548	Nucleolar complex protein 3 homolog OS=Homo sapiens OX=9606 GN=NOC3L PE=1 SV=1
P48729	38	10	10		23378000	89699000	74036000	38915	Casein kinase I isoform alpha OS=Homo sapiens OX=9606 GN=CSNK1A1 PE=1 SV=2
Q9BV86	23	5	5	Acetylation (Protein N-term)	3787900	32589000	27253000	25387	N-terminal Xaa-Pro-Lys N-methyltransferase 1 OS=Homo sapiens OX=9606 GN=NTMT1 PE=1 SV=3
P05204	46	5	4		6067700	68577000	25080000	9393	Non-histone chromosomal protein HMG-17 OS=Homo sapiens OX=9606 GN=HMGN2 PE=1 SV=3
Q9H6S3	10	5	5		3245700	30614000	40831000	80621	Epidermal growth factor receptor kinase substrate 8-like protein 2 OS=Homo sapiens OX=9606 GN=EPS8L2 PE=1 SV=2
Q6PL18	16	12	12		13436000	18011000	6059500	158554	ATPase family AAA domain-containing protein 2 OS=Homo sapiens OX=9606 GN=ATAD2 PE=1 SV=1
P16144	5	5	5		3354000	22478000	33541000	202166	Integrin beta-4 OS=Homo sapiens OX=9606 GN=ITGB4 PE=1 SV=5
Q9GZR2	25	7	7		188820000	12281000	47067000	46672	RNA exonuclease 4 OS=Homo sapiens OX=9606 GN=REXO4 PE=1 SV=2
Q13601	11	4	4		8052400	11293000	33060000	43665	KRR1 small subunit processome component homolog OS=Homo sapiens OX=9606 GN=KRR1 PE=1 SV=4
O15234	11	4	4		891100	22558000	15946000	76278	Protein CASC3 OS=Homo sapiens OX=9606 GN=CASC3 PE=1 SV=2
Q14683	41	49	49	Oxidation (M)	184950000	490970000	285000000	143233	Structural maintenance of chromosomes protein 1A OS=Homo sapiens OX=9606 GN=SMC1A PE=1 SV=2
O60701	40	26	26		168900000	591000000	608410000	55024	UDP-glucose 6-dehydrogenase OS=Homo sapiens OX=9606 GN=UGDH PE=1 SV=1
Q07812	44	6	6		17388000	69217000	87144000	21184	Apoptosis regulator BAX OS=Homo sapiens OX=9606 GN=BAX PE=1 SV=1
P55084	55	26	26		121510000	513220000	407690000	51294	Trifunctional enzyme subunit beta mitochondrial OS=Homo sapiens OX=9606 GN=HADHB PE=1 SV=3
A3KN83	3	3	3		1417700	759860	2996000	154312	Protein strawberry notch homolog 1 OS=Homo sapiens OX=9606 GN=SBNO1 PE=1 SV=1
Q9Y5B9	43	46	45	Acetylation (Protein N-term)	534580000	792110000	848760000	119914	FACT complex subunit SPT16 OS=Homo sapiens OX=9606 GN=SUPT16H PE=1 SV=1
P37268	13	4	4		5271600	10029000	13366000	48115	Squalene synthase OS=Homo sapiens OX=9606 GN=FDFT1 PE=1 SV=1
O14561	21	5	5		41872000	82703000	32897000	17417	Acyl carrier protein mitochondrial OS=Homo sapiens OX=9606 GN=NDUFAB1 PE=1 SV=3
P11021	66	71	64	Oxidation (M)	1117600000	3433000000	2855900000	72333	Endoplasmic reticulum chaperone BiP OS=Homo sapiens OX=9606 GN=HSPA5 PE=1 SV=2
Q14160	18	17	17		18671000	37346000	78949000	174884	Protein scribble homolog OS=Homo sapiens OX=9606 GN=SCRIB PE=1 SV=4
Q969Z0	38	15	15		27557000	47801000	80439000	70738	FAST kinase domain-containing protein 4 OS=Homo sapiens OX=9606 GN=TBRG4 PE=1 SV=1
O95816	54	13	13		227220000	246330000	102150000	23772	BAG family molecular chaperone regulator 2 OS=Homo sapiens OX=9606 GN=BAG2 PE=1 SV=1
P17568	20	3	3		15805000	77856000	143550000	16402	NADH dehydrogenase [ubiquinone] 1 beta subcomplex subunit 7 OS=Homo sapiens OX=9606 GN=NDUFB7 PE=1 SV=4
P51648	28	14	12	Oxidation (M)	54110000	172440000	199950000	54848	Aldehyde dehydrogenase family 3 member A2 OS=Homo sapiens OX=9606 GN=ALDH3A2 PE=1 SV=1
P14625	62	63	59		448290000	1176400000	1139800000	92469	Endoplasmin OS=Homo sapiens OX=9606 GN=HSP90B1 PE=1 SV=1
Q5JTH9	31	28	28		227720000	180240000	399130000	143702	RRP12-like protein OS=Homo sapiens OX=9606 GN=RRP12 PE=1 SV=2
Q14739	19	10	10		53968000	155350000	224290000	70703	Delta(14)-sterol reductase LBR OS=Homo sapiens OX=9606 GN=LBR PE=1 SV=2
Q9Y277	36	7	7		112300000	26349000	12740000	30659	Voltage-dependent anion-selective channel protein 3 OS=Homo sapiens OX=9606 GN=VDAC3 PE=1 SV=1
P18206	56	53	53		694710000	1311400000	1231700000	123799	Vinculin OS=Homo sapiens OX=9606 GN=VCL PE=1 SV=4
Q9NP58	16	7	7		7746200	3349900	8428400	93886	ATP-binding cassette sub-family B member 6 OS=Homo sapiens OX=9606 GN=ABCB6 PE=1 SV=1
Q99543	12	6	6	Acetylation (Protein N-term)	1374700	7322800	8381000	71996	DnaJ homolog subfamily C member 2 OS=Homo sapiens OX=9606 GN=DNAJC2 PE=1 SV=4
Q13823	26	15	15		45491000	170430000	105830000	83655	Nucleolar GTP-binding protein 2 OS=Homo sapiens OX=9606 GN=GNL2 PE=1 SV=1
Q15293	64	21	21		155290000	406590000	317220000	38890	Reticulocalbin-1 OS=Homo sapiens OX=9606 GN=RCN1 PE=1 SV=1
P68032	60	75	7	Oxidation (M)	4128500000	3169600000	5630000000	42019	Actin alpha cardiac muscle 1 OS=Homo sapiens OX=9606 GN=ACTC1 PE=1 SV=1
P16455	17	2	2		1141100	151950	664930	21646	Methylated-DNA--protein-cysteine methyltransferase OS=Homo sapiens OX=9606 GN=MGMT PE=1 SV=1
P08648	15	9	9		37548000	471230000	319910000	114536	Integrin alpha-5 OS=Homo sapiens OX=9606 GN=ITGA5 PE=1 SV=2
Q9Y295	43	13	12		49294000	87595000	120390000	40542	Developmentally-regulated GTP-binding protein 1 OS=Homo sapiens OX=9606 GN=DRG1 PE=1 SV=1
Q9HCG8	3	3	3		22304000	637480	588040	105466	Pre-mRNA-splicing factor CWC22 homolog OS=Homo sapiens OX=9606 GN=CWC22 PE=1 SV=3
Q969X5	19	4	4		3272300	603300	593760	32592	Endoplasmic reticulum-Golgi intermediate compartment protein 1 OS=Homo sapiens OX=9606 GN=ERGIC1 PE=1 SV=1
P04908	49	29	4		14683000	73268000	50190000	14135	Histone H2A type 1-B/E OS=Homo sapiens OX=9606 GN=H2AC4 PE=1 SV=2
Q7L7L0	49	29	4		14683000	73268000	50190000	14121	Histone H2A type 3 OS=Homo sapiens OX=9606 GN=H2AW PE=1 SV=3
Q93077	49	29	4		14683000	73268000	50190000	14105	Histone H2A type 1-C OS=Homo sapiens OX=9606 GN=H2AC6 PE=1 SV=3
Q9BUF5	66	50	10	Oxidation (M)	192920000	25295000	30924000	49857	Tubulin beta-6 chain OS=Homo sapiens OX=9606 GN=TUBB6 PE=1 SV=1
Q14151	29	25	13	Acetylation (Protein N-term)	36888000	67595000	106020000	107474	Scaffold attachment factor B2 OS=Homo sapiens OX=9606 GN=SAFB2 PE=1 SV=1
Q6R327	3	3	3		5459200	3450600	589560	192216	Rapamycin-insensitive companion of mTOR OS=Homo sapiens OX=9606 GN=RICTOR PE=1 SV=1
Q15181	64	25	24	Carbamidomethylation	215700000	557910000	620390000	32660	Inorganic pyrophosphatase OS=Homo sapiens OX=9606 GN=PPA1 PE=1 SV=2
Q86TS9	42	3	3		3137500	0	0	13664	39S ribosomal protein L52 mitochondrial OS=Homo sapiens OX=9606 GN=MRPL52 PE=1 SV=2
Q92544	8	3	3		5204600	67880000	88217000	74519	Transmembrane 9 superfamily member 4 OS=Homo sapiens OX=9606 GN=TM9SF4 PE=1 SV=2
Q86UE4	51	27	27		89272000	207290000	148600000	63837	Protein LYRIC OS=Homo sapiens OX=9606 GN=MTDH PE=1 SV=2
Q92542	11	5	5		18673000	2093800	3054900	78411	Nicastrin OS=Homo sapiens OX=9606 GN=NCSTN PE=1 SV=2
Q8IXB1	6	3	3		2272000	0	0	91080	DnaJ homolog subfamily C member 10 OS=Homo sapiens OX=9606 GN=DNAJC10 PE=1 SV=2
Q96EU6	23	3	3		2870100	414340	371380	29823	Ribosomal RNA processing protein 36 homolog OS=Homo sapiens OX=9606 GN=RRP36 PE=1 SV=1
P26368	37	15	15	Oxidation (M)	171890000	46607000	91705000	53501	Splicing factor U2AF 65 kDa subunit OS=Homo sapiens OX=9606 GN=U2AF2 PE=1 SV=4
Q12907	48	11	11		49607000	474870000	97537000	40229	Vesicular integral-membrane protein VIP36 OS=Homo sapiens OX=9606 GN=LMAN2 PE=1 SV=1
Q92614	4	7	6		1767800	17951000	12095000	233113	Unconventional myosin-XVIIIa OS=Homo sapiens OX=9606 GN=MYO18A PE=1 SV=3
Q1KMD3	27	21	21		174770000	183160000	362800000	85105	Heterogeneous nuclear ribonucleoprotein U-like protein 2 OS=Homo sapiens OX=9606 GN=HNRNPUL2 PE=1 SV=1
Q9NXR1	12	3	3		1567800	5879500	16037000	37721	Nuclear distribution protein nudE homolog 1 OS=Homo sapiens OX=9606 GN=NDE1 PE=1 SV=3
P35237	34	10	10		33943000	98565000	69688000	42622	Serpin B6 OS=Homo sapiens OX=9606 GN=SERPINB6 PE=1 SV=3
Q53LP3	11	3	3	Acetylation (Protein N-term)	26113	1349200	2393000	55672	Ankyrin repeat domain-containing protein SOWAHC OS=Homo sapiens OX=9606 GN=SOWAHC PE=1 SV=1
Q02127	25	7	7		10925000	91860000	33113000	42867	Dihydroorotate dehydrogenase (quinone) mitochondrial OS=Homo sapiens OX=9606 GN=DHODH PE=1 SV=3
Q7Z417	37	18	18		41699000	107260000	162010000	76121	Nuclear fragile X mental retardation-interacting protein 2 OS=Homo sapiens OX=9606 GN=NUFIP2 PE=1 SV=1
Q02539	40	15	4	Acetylation (Protein N-term)	42531000	9176200	2331600	21842	Histone H1.1 OS=Homo sapiens OX=9606 GN=H1-1 PE=1 SV=3
P21291	33	5	5		270440000	1027300000	1290600000	20567	Cysteine and glycine-rich protein 1 OS=Homo sapiens OX=9606 GN=CSRP1 PE=1 SV=3
P50454	65	28	28		239780000	224950000	277240000	46441	Serpin H1 OS=Homo sapiens OX=9606 GN=SERPINH1 PE=1 SV=2
O14497	4	4	4	Acetylation (Protein N-term)	1282600	7466400	5117500	242042	AT-rich interactive domain-containing protein 1A OS=Homo sapiens OX=9606 GN=ARID1A PE=1 SV=3
O43837	25	5	5		13746000	2210400	1905000	42184	Isocitrate dehydrogenase [NAD] subunit beta mitochondrial OS=Homo sapiens OX=9606 GN=IDH3B PE=1 SV=2
Q71RC2	22	11	11		22630000	113270000	93197000	80596	La-related protein 4 OS=Homo sapiens OX=9606 GN=LARP4 PE=1 SV=3
Q9NUQ8	6	4	4		3040300	18973000	19037000	79745	ATP-binding cassette sub-family F member 3 OS=Homo sapiens OX=9606 GN=ABCF3 PE=1 SV=2
Q9NPA0	18	3	3		9879900	67063000	47218000	26471	ER membrane protein complex subunit 7 OS=Homo sapiens OX=9606 GN=EMC7 PE=1 SV=1
Q9UJS0	42	21	18		36335000	56495000	177140000	74176	Calcium-binding mitochondrial carrier protein Aralar2 OS=Homo sapiens OX=9606 GN=SLC25A13 PE=1 SV=2
Q96S59	6	3	3		1339500	8308600	10015000	77847	Ran-binding protein 9 OS=Homo sapiens OX=9606 GN=RANBP9 PE=1 SV=1
Q96L91	1	2	2		12000000	2433600	1783900	343487	E1A-binding protein p400 OS=Homo sapiens OX=9606 GN=EP400 PE=1 SV=4
Q15646	12	4	4	Acetylation (Protein N-term)	1880600	773360	2339300	59226	2'-5'-oligoadenylate synthase-like protein OS=Homo sapiens OX=9606 GN=OASL PE=1 SV=2
P82909	46	4	4		44075000	14788000	4898700	11466	28S ribosomal protein S36 mitochondrial OS=Homo sapiens OX=9606 GN=MRPS36 PE=1 SV=2
P15924	29	61	61		249690000	364430000	278210000	331774	Desmoplakin OS=Homo sapiens OX=9606 GN=DSP PE=1 SV=3
Q9UHD2	7	3	3		173540	3512100	1571900	83642	Serine/threonine-protein kinase TBK1 OS=Homo sapiens OX=9606 GN=TBK1 PE=1 SV=1
Q9Y333	40	3	3		54231000	15926000	38767000	10835	U6 snRNA-associated Sm-like protein LSm2 OS=Homo sapiens OX=9606 GN=LSM2 PE=1 SV=1
P00558	78	47	47	Oxidation (M); Acetylation (Protein N-term)	3164800000	3332500000	4742500000	44615	Phosphoglycerate kinase 1 OS=Homo sapiens OX=9606 GN=PGK1 PE=1 SV=3
P13489	12	7	7		36058000	165410000	149240000	49974	Ribonuclease inhibitor OS=Homo sapiens OX=9606 GN=RNH1 PE=1 SV=2
P68871	13	3	3		4357700	14820000	19636000	15998	Hemoglobin subunit beta OS=Homo sapiens OX=9606 GN=HBB PE=1 SV=2
P02042	13	3	3		4357700	14820000	19636000	16055	Hemoglobin subunit delta OS=Homo sapiens OX=9606 GN=HBD PE=1 SV=2
Q8N8S7	25	8	8		8971900	28121000	24030000	66510	Protein enabled homolog OS=Homo sapiens OX=9606 GN=ENAH PE=1 SV=2
Q02880	28	41	23		52766000	214430000	157300000	183266	DNA topoisomerase 2-beta OS=Homo sapiens OX=9606 GN=TOP2B PE=1 SV=3
O75663	27	5	5		4843600	40392000	16201000	31444	TIP41-like protein OS=Homo sapiens OX=9606 GN=TIPRL PE=1 SV=2
Q9H3P7	41	14	14		26494000	105100000	111540000	60593	Golgi resident protein GCP60 OS=Homo sapiens OX=9606 GN=ACBD3 PE=1 SV=4
Q9UKG1	7	3	3		6496500	9618500	3286700	79664	DCC-interacting protein 13-alpha OS=Homo sapiens OX=9606 GN=APPL1 PE=1 SV=1
Q92504	3	1	1		6327100	16763000	5990600	50118	Zinc transporter SLC39A7 OS=Homo sapiens OX=9606 GN=SLC39A7 PE=1 SV=2
Q14CX7	15	8	8		2448200	14984000	11474000	112292	N-alpha-acetyltransferase 25 NatB auxiliary subunit OS=Homo sapiens OX=9606 GN=NAA25 PE=1 SV=1
Q14165	35	7	7		48683000	80033000	33368000	32234	Malectin OS=Homo sapiens OX=9606 GN=MLEC PE=1 SV=1
Q13564	27	9	9		37123000	47146000	146980000	60246	NEDD8-activating enzyme E1 regulatory subunit OS=Homo sapiens OX=9606 GN=NAE1 PE=1 SV=1
P42892	27	12	12		20467000	5732800	15959000	87164	Endothelin-converting enzyme 1 OS=Homo sapiens OX=9606 GN=ECE1 PE=1 SV=2
O94905	34	9	6		32362000	23577000	58505000	37840	Erlin-2 OS=Homo sapiens OX=9606 GN=ERLIN2 PE=1 SV=1
Q9Y3B9	24	8	8		10511000	39604000	23197000	31484	RRP15-like protein OS=Homo sapiens OX=9606 GN=RRP15 PE=1 SV=2
O95470	11	4	4		24348000	1363300	3600700	63524	Sphingosine-1-phosphate lyase 1 OS=Homo sapiens OX=9606 GN=SGPL1 PE=1 SV=3
O43172	34	13	13		38012000	170580000	96396000	58449	U4/U6 small nuclear ribonucleoprotein Prp4 OS=Homo sapiens OX=9606 GN=PRPF4 PE=1 SV=2
Q6NW34	8	3	3		782380	7813900	10514000	64552	Nucleolus and neural progenitor protein OS=Homo sapiens OX=9606 GN=NEPRO PE=1 SV=3
P50579	33	13	13	Acetylation (Protein N-term)	33649000	114190000	118450000	52892	Methionine aminopeptidase 2 OS=Homo sapiens OX=9606 GN=METAP2 PE=1 SV=1
Q92575	10	3	3		5942400	35283000	35601000	56778	UBX domain-containing protein 4 OS=Homo sapiens OX=9606 GN=UBXN4 PE=1 SV=2
Q9NP72	39	7	7	Acetylation (Protein N-term)	17826000	90001000	76286000	22977	Ras-related protein Rab-18 OS=Homo sapiens OX=9606 GN=RAB18 PE=1 SV=1
Q03135	30	5	5		21679000	32248000	9876100	20472	Caveolin-1 OS=Homo sapiens OX=9606 GN=CAV1 PE=1 SV=4
O75955	56	18	18		245500000	398530000	447640000	47355	Flotillin-1 OS=Homo sapiens OX=9606 GN=FLOT1 PE=1 SV=3
Q9GZL7	35	9	9		38595000	20504000	52487000	47708	Ribosome biogenesis protein WDR12 OS=Homo sapiens OX=9606 GN=WDR12 PE=1 SV=2
P52948	23	28	28		97228000	79389000	138620000	197578	Nuclear pore complex protein Nup98-Nup96 OS=Homo sapiens OX=9606 GN=NUP98 PE=1 SV=4
P24534	62	17	16	Oxidation (M)	1205300000	403630000	700650000	24764	Elongation factor 1-beta OS=Homo sapiens OX=9606 GN=EEF1B2 PE=1 SV=3
Q16666	22	12	12		75065000	73083000	225540000	88256	Gamma-interferon-inducible protein 16 OS=Homo sapiens OX=9606 GN=IFI16 PE=1 SV=3
P31937	37	8	8		8488900	17253000	35151000	35329	3-hydroxyisobutyrate dehydrogenase mitochondrial OS=Homo sapiens OX=9606 GN=HIBADH PE=1 SV=2
P00403	26	5	5	Oxidation (M)	71666000	30503000	65216000	25565	Cytochrome c oxidase subunit 2 OS=Homo sapiens OX=9606 GN=MT-CO2 PE=1 SV=1
Q12904	58	14	14		87739000	200920000	246600000	34353	Aminoacyl tRNA synthase complex-interacting multifunctional protein 1 OS=Homo sapiens OX=9606 GN=AIMP1 PE=1 SV=2
Q9Y2W2	30	15	15		62787000	48755000	41690000	69998	WW domain-binding protein 11 OS=Homo sapiens OX=9606 GN=WBP11 PE=1 SV=1
P49748	50	26	25		194390000	734990000	242070000	70390	Very long-chain specific acyl-CoA dehydrogenase mitochondrial OS=Homo sapiens OX=9606 GN=ACADVL PE=1 SV=1
Q92665	41	13	13		9781000	33713000	27517000	45319	28S ribosomal protein S31 mitochondrial OS=Homo sapiens OX=9606 GN=MRPS31 PE=1 SV=3
A5YKK6	7	13	13		19744000	29545000	45304000	266937	CCR4-NOT transcription complex subunit 1 OS=Homo sapiens OX=9606 GN=CNOT1 PE=1 SV=2
Q9NVH1	20	7	7	Acetylation (Protein N-term)	21276000	10434000	28098000	63278	DnaJ homolog subfamily C member 11 OS=Homo sapiens OX=9606 GN=DNAJC11 PE=1 SV=2
Q9Y399	29	6	6		9506300	102010000	29374000	33249	28S ribosomal protein S2 mitochondrial OS=Homo sapiens OX=9606 GN=MRPS2 PE=1 SV=1
P50336	17	4	4		0	22111	81566	50765	Protoporphyrinogen oxidase OS=Homo sapiens OX=9606 GN=PPOX PE=1 SV=1
P25815	39	6	6		126060000	121860000	95652000	10400	Protein S100-P OS=Homo sapiens OX=9606 GN=S100P PE=1 SV=2
O00411	10	7	7		77272	100400	350050	138620	DNA-directed RNA polymerase mitochondrial OS=Homo sapiens OX=9606 GN=POLRMT PE=1 SV=2
Q9ULW0	17	8	8		11451000	35020000	17059000	85653	Targeting protein for Xklp2 OS=Homo sapiens OX=9606 GN=TPX2 PE=1 SV=2
P25685	29	11	11		62296000	90088000	40481000	38044	DnaJ homolog subfamily B member 1 OS=Homo sapiens OX=9606 GN=DNAJB1 PE=1 SV=4
O00767	17	3	3		6694700	285840	3437700	41523	Stearoyl-CoA desaturase OS=Homo sapiens OX=9606 GN=SCD PE=1 SV=2
Q14839	32	55	39		207700000	142390000	198100000	218003	Chromodomain-helicase-DNA-binding protein 4 OS=Homo sapiens OX=9606 GN=CHD4 PE=1 SV=2
O00231	53	21	21	Oxidation (M); Acetylation (Protein N-term)	333720000	468560000	341180000	47464	26S proteasome non-ATPase regulatory subunit 11 OS=Homo sapiens OX=9606 GN=PSMD11 PE=1 SV=3
Q99417	65	5	5		22339000	32550000	114610000	11967	c-Myc-binding protein OS=Homo sapiens OX=9606 GN=MYCBP PE=1 SV=3
P11717	2	3	3		4148200	9784100	26892000	274373	Cation-independent mannose-6-phosphate receptor OS=Homo sapiens OX=9606 GN=IGF2R PE=1 SV=3
P30040	62	16	16	Carbamidomethylation	95674000	230070000	214660000	28993	Endoplasmic reticulum resident protein 29 OS=Homo sapiens OX=9606 GN=ERP29 PE=1 SV=4
Q9BQG0	50	60	60	Carbamidomethylation; Acetylation (Protein N-term)	313890000	544260000	412130000	148854	Myb-binding protein 1A OS=Homo sapiens OX=9606 GN=MYBBP1A PE=1 SV=2
P05114	60	13	13		74821000	109220000	81423000	10659	Non-histone chromosomal protein HMG-14 OS=Homo sapiens OX=9606 GN=HMGN1 PE=1 SV=3
O75964	52	6	6		76405000	15196000	14973000	11428	ATP synthase subunit g mitochondrial OS=Homo sapiens OX=9606 GN=ATP5MG PE=1 SV=3
Q16836	55	10	10		35614000	133980000	55136000	34294	Hydroxyacyl-coenzyme A dehydrogenase mitochondrial OS=Homo sapiens OX=9606 GN=HADH PE=1 SV=3
O43143	41	35	35	Oxidation (M)	1087500000	581230000	1484800000	90933	Pre-mRNA-splicing factor ATP-dependent RNA helicase DHX15 OS=Homo sapiens OX=9606 GN=DHX15 PE=1 SV=2
Q9H4I3	21	4	4	Acetylation (Protein N-term)	3766300	20662000	21265000	42321	TraB domain-containing protein OS=Homo sapiens OX=9606 GN=TRABD PE=1 SV=1
Q9UIG0	29	39	39		197460000	379290000	280320000	170902	Tyrosine-protein kinase BAZ1B OS=Homo sapiens OX=9606 GN=BAZ1B PE=1 SV=2
Q15651	42	5	4		4147900	15942000	4475000	10666	High mobility group nucleosome-binding domain-containing protein 3 OS=Homo sapiens OX=9606 GN=HMGN3 PE=1 SV=2
Q9NZT2	24	10	10		19001000	61525000	19242000	73325	Opioid growth factor receptor OS=Homo sapiens OX=9606 GN=OGFR PE=1 SV=3
Q99439	14	3	2		3946700	0	5626800	33697	Calponin-2 OS=Homo sapiens OX=9606 GN=CNN2 PE=1 SV=4
P17858	18	9	7	Oxidation (M)	37340000	39857000	190690000	85018	ATP-dependent 6-phosphofructokinase liver type OS=Homo sapiens OX=9606 GN=PFKL PE=1 SV=6
Q02543	43	14	14	Carbamidomethylation	288870000	459850000	231170000	20762	60S ribosomal protein L18a OS=Homo sapiens OX=9606 GN=RPL18A PE=1 SV=2
P11169	10	3	3		10491000	1336200	1036800	53924	Solute carrier family 2 facilitated glucose transporter member 3 OS=Homo sapiens OX=9606 GN=SLC2A3 PE=1 SV=1
P06744	65	41	41	Oxidation (M); Acetylation (Protein N-term)	1524400000	378710000	378520000	63147	Glucose-6-phosphate isomerase OS=Homo sapiens OX=9606 GN=GPI PE=1 SV=4
P40763	43	21	21	Acetylation (Protein N-term)	55799000	80840000	88900000	88068	Signal transducer and activator of transcription 3 OS=Homo sapiens OX=9606 GN=STAT3 PE=1 SV=2
P14209	13	2	2		15120000	1163200	44272000	18848	CD99 antigen OS=Homo sapiens OX=9606 GN=CD99 PE=1 SV=1
O00422	54	8	8		78947000	113240000	74169000	17561	Histone deacetylase complex subunit SAP18 OS=Homo sapiens OX=9606 GN=SAP18 PE=1 SV=1
O94826	38	17	17	Acetylation (Protein N-term)	64524000	122790000	131570000	67455	Mitochondrial import receptor subunit TOM70 OS=Homo sapiens OX=9606 GN=TOMM70 PE=1 SV=1
A6NJ78	14	3	3		2397800	34334000	30936000	46121	12S rRNA N4-methylcytidine (m4C) methyltransferase OS=Homo sapiens OX=9606 GN=METTL15 PE=1 SV=1
Q9HCN8	39	4	4		20209000	5033000	4550700	23598	Stromal cell-derived factor 2-like protein 1 OS=Homo sapiens OX=9606 GN=SDF2L1 PE=1 SV=2
Q6PJG2	6	3	3		251560	0	1592800	114989	Mitotic deacetylase-associated SANT domain protein OS=Homo sapiens OX=9606 GN=MIDEAS PE=1 SV=2
Q9UGV2	22	5	5	Acetylation (Protein N-term)	1883500	13879000	14470000	41409	Protein NDRG3 OS=Homo sapiens OX=9606 GN=NDRG3 PE=1 SV=2
Q9Y5B6	9	5	5		625900	10200000	12083000	104804	PAX3- and PAX7-binding protein 1 OS=Homo sapiens OX=9606 GN=PAXBP1 PE=1 SV=2
O00470	6	2	2		1675100	62835	454280	43016	Homeobox protein Meis1 OS=Homo sapiens OX=9606 GN=MEIS1 PE=1 SV=1
P23229	16	11	11		17461000	60923000	67043000	126605	Integrin alpha-6 OS=Homo sapiens OX=9606 GN=ITGA6 PE=1 SV=5
Q99623	65	21	21		680830000	726700000	254120000	33296	Prohibitin-2 OS=Homo sapiens OX=9606 GN=PHB2 PE=1 SV=2
Q86YZ3	1	1	1		257600	3647200	0	282389	Hornerin OS=Homo sapiens OX=9606 GN=HRNR PE=1 SV=2
Q15813	7	3	3		881560	2801400	883910	59346	Tubulin-specific chaperone E OS=Homo sapiens OX=9606 GN=TBCE PE=1 SV=1
P52435	28	3	3	Acetylation (Protein N-term)	797900	405850	1291200	13293	DNA-directed RNA polymerase II subunit RPB11-a OS=Homo sapiens OX=9606 GN=POLR2J PE=1 SV=1
P15291	27	6	6		31835000	8475900	29700000	43920	Beta-1 4-galactosyltransferase 1 OS=Homo sapiens OX=9606 GN=B4GALT1 PE=1 SV=5
Q9BVK6	38	7	7		11522000	83029000	71595000	27277	Transmembrane emp24 domain-containing protein 9 OS=Homo sapiens OX=9606 GN=TMED9 PE=1 SV=2
Q9NUL3	7	3	3		20746000	2791900	10036000	62609	Double-stranded RNA-binding protein Staufen homolog 2 OS=Homo sapiens OX=9606 GN=STAU2 PE=1 SV=2
O60287	9	12	12		27647000	170200000	28678000	254386	Nucleolar pre-ribosomal-associated protein 1 OS=Homo sapiens OX=9606 GN=URB1 PE=1 SV=4
P37198	21	8	8	Acetylation (Protein N-term)	6648500	16620000	32833000	53255	Nuclear pore glycoprotein p62 OS=Homo sapiens OX=9606 GN=NUP62 PE=1 SV=3
Q9H089	12	7	7		25624000	113360000	45808000	75225	Large subunit GTPase 1 homolog OS=Homo sapiens OX=9606 GN=LSG1 PE=1 SV=2
Q9HC52	14	3	3		211840	9137400	7985900	43396	Chromobox protein homolog 8 OS=Homo sapiens OX=9606 GN=CBX8 PE=1 SV=3
Q14118	6	3	3		6195300	824050	1463400	97441	Dystroglycan OS=Homo sapiens OX=9606 GN=DAG1 PE=1 SV=2
Q96DI7	46	12	12		55980000	54075000	72209000	39311	U5 small nuclear ribonucleoprotein 40 kDa protein OS=Homo sapiens OX=9606 GN=SNRNP40 PE=1 SV=1
Q9H8V3	7	4	4		1439400	148090	234120	103505	Protein ECT2 OS=Homo sapiens OX=9606 GN=ECT2 PE=1 SV=4
O75976	6	4	4		3392200	20551000	9110900	152931	Carboxypeptidase D OS=Homo sapiens OX=9606 GN=CPD PE=1 SV=2
P25490	8	5	5		9624900	13310000	26156000	44713	Transcriptional repressor protein YY1 OS=Homo sapiens OX=9606 GN=YY1 PE=1 SV=2
Q9BVT8	17	3	3		1545900	15860000	12670000	26261	Transmembrane and ubiquitin-like domain-containing protein 1 OS=Homo sapiens OX=9606 GN=TMUB1 PE=1 SV=1
Q9UL25	32	6	6	Acetylation (Protein N-term)	112390000	32158000	80815000	24348	Ras-related protein Rab-21 OS=Homo sapiens OX=9606 GN=RAB21 PE=1 SV=3
P49588	43	32	32	Acetylation (Protein N-term)	174700000	418270000	342570000	106810	Alanine--tRNA ligase cytoplasmic OS=Homo sapiens OX=9606 GN=AARS1 PE=1 SV=2
Q93052	21	7	7		21624000	66400000	79843000	65746	Lipoma-preferred partner OS=Homo sapiens OX=9606 GN=LPP PE=1 SV=1
Q92538	10	13	12		18791000	25612000	18429000	206444	Golgi-specific brefeldin A-resistance guanine nucleotide exchange factor 1 OS=Homo sapiens OX=9606 GN=GBF1 PE=1 SV=2
P49023	11	4	4		3782600	14332000	6189700	64505	Paxillin OS=Homo sapiens OX=9606 GN=PXN PE=1 SV=3
O15118	5	4	4		26293000	29245000	65005000	142166	NPC intracellular cholesterol transporter 1 OS=Homo sapiens OX=9606 GN=NPC1 PE=1 SV=2
Q9Y3Y2	32	6	6	Oxidation (M)	29307000	67450000	32833000	26397	Chromatin target of PRMT1 protein OS=Homo sapiens OX=9606 GN=CHTOP PE=1 SV=2
Q13885	72	74	4	Carbamidomethylation; Oxidation (M)	37544000	5432400	27506000	49907	Tubulin beta-2A chain OS=Homo sapiens OX=9606 GN=TUBB2A PE=1 SV=1
P25786	55	14	14		201690000	269520000	159330000	29556	Proteasome subunit alpha type-1 OS=Homo sapiens OX=9606 GN=PSMA1 PE=1 SV=1
Q9ULK4	3	3	3		3977500	363360	1157100	156473	Mediator of RNA polymerase II transcription subunit 23 OS=Homo sapiens OX=9606 GN=MED23 PE=1 SV=2
Q9Y6G9	37	14	14		37863000	90640000	108230000	56579	Cytoplasmic dynein 1 light intermediate chain 1 OS=Homo sapiens OX=9606 GN=DYNC1LI1 PE=1 SV=3
P69905	28	3	3		11286000	62682000	55943000	15258	Hemoglobin subunit alpha OS=Homo sapiens OX=9606 GN=HBA1 PE=1 SV=2
Q6RW13	25	2	2		4910300	22190000	26866000	17419	Type-1 angiotensin II receptor-associated protein OS=Homo sapiens OX=9606 GN=AGTRAP PE=1 SV=1
P51858	69	24	21	Oxidation (M)	417450000	989280000	1273100000	26788	Hepatoma-derived growth factor OS=Homo sapiens OX=9606 GN=HDGF PE=1 SV=1
Q96QC0	19	12	11		5906400	23370000	10946000	99058	Serine/threonine-protein phosphatase 1 regulatory subunit 10 OS=Homo sapiens OX=9606 GN=PPP1R10 PE=1 SV=1
Q9Y383	28	13	10		107140000	226540000	119620000	46514	Putative RNA-binding protein Luc7-like 2 OS=Homo sapiens OX=9606 GN=LUC7L2 PE=1 SV=2
Q99470	25	3	3		536490	19191000	20143000	23026	Stromal cell-derived factor 2 OS=Homo sapiens OX=9606 GN=SDF2 PE=1 SV=2
Q9BV57	34	5	5		12886000	46624000	42391000	21498	1 2-dihydroxy-3-keto-5-methylthiopentene dioxygenase OS=Homo sapiens OX=9606 GN=ADI1 PE=1 SV=1
Q13405	30	4	4		3248000	26704000	18758000	19198	39S ribosomal protein L49 mitochondrial OS=Homo sapiens OX=9606 GN=MRPL49 PE=1 SV=1
Q96KB5	17	5	5	Acetylation (Protein N-term)	16508000	68291000	72297000	36085	Lymphokine-activated killer T-cell-originated protein kinase OS=Homo sapiens OX=9606 GN=PBK PE=1 SV=3
P08174	12	4	4		5168300	27985000	25906000	41400	Complement decay-accelerating factor OS=Homo sapiens OX=9606 GN=CD55 PE=1 SV=4
Q9H4A3	5	7	7		10625000	28323000	24528000	250791	Serine/threonine-protein kinase WNK1 OS=Homo sapiens OX=9606 GN=WNK1 PE=1 SV=2
O15027	24	27	27	Acetylation (Protein N-term)	36433000	80939000	116510000	251891	Protein transport protein Sec16A OS=Homo sapiens OX=9606 GN=SEC16A PE=1 SV=4
Q00403	17	3	3		2018400	20355000	26396000	34833	Transcription initiation factor IIB OS=Homo sapiens OX=9606 GN=GTF2B PE=1 SV=1
Q12769	17	17	17		26847000	56632000	59029000	162121	Nuclear pore complex protein Nup160 OS=Homo sapiens OX=9606 GN=NUP160 PE=1 SV=3
Q14137	32	17	17		51098000	44407000	65025000	83630	Ribosome biogenesis protein BOP1 OS=Homo sapiens OX=9606 GN=BOP1 PE=1 SV=2
Q14244	24	18	17	Acetylation (Protein N-term)	117280000	203600000	2917200000	84052	Ensconsin OS=Homo sapiens OX=9606 GN=MAP7 PE=1 SV=1
Q9NQW6	8	7	7		5833300	12423000	18936000	124199	Anillin OS=Homo sapiens OX=9606 GN=ANLN PE=1 SV=2
P39656	50	14	14		63019000	98965000	76092000	50801	Dolichyl-diphosphooligosaccharide--protein glycosyltransferase 48 kDa subunit OS=Homo sapiens OX=9606 GN=DDOST PE=1 SV=4
O94906	36	32	32		181440000	387350000	268310000	106925	Pre-mRNA-processing factor 6 OS=Homo sapiens OX=9606 GN=PRPF6 PE=1 SV=1
Q8TCS8	34	22	22		42728000	138210000	56696000	85951	Polyribonucleotide nucleotidyltransferase 1 mitochondrial OS=Homo sapiens OX=9606 GN=PNPT1 PE=1 SV=2
O14579	39	10	10		52563000	36241000	61433000	34482	Coatomer subunit epsilon OS=Homo sapiens OX=9606 GN=COPE PE=1 SV=3
P52294	17	8	5		12268000	41344000	61695000	60222	Importin subunit alpha-5 OS=Homo sapiens OX=9606 GN=KPNA1 PE=1 SV=3
Q92896	4	4	4		3206500	19490000	12651000	134552	Golgi apparatus protein 1 OS=Homo sapiens OX=9606 GN=GLG1 PE=1 SV=2
Q92841	51	41	29	Carbamidomethylation; Oxidation (M)	621180000	480580000	693710000	80273	Probable ATP-dependent RNA helicase DDX17 OS=Homo sapiens OX=9606 GN=DDX17 PE=1 SV=2
Q9C005	57	4	4	Acetylation (Protein N-term)	37360000	9392600	21051000	11250	Protein dpy-30 homolog OS=Homo sapiens OX=9606 GN=DPY30 PE=1 SV=1
P11279	11	5	5		76317000	18286000	15037000	44882	Lysosome-associated membrane glycoprotein 1 OS=Homo sapiens OX=9606 GN=LAMP1 PE=1 SV=3
Q3KQU3	15	10	9		33118000	19799000	33356000	92820	MAP7 domain-containing protein 1 OS=Homo sapiens OX=9606 GN=MAP7D1 PE=1 SV=1
Q14157	41	25	25	Oxidation (M)	125260000	246900000	247890000	114534	Ubiquitin-associated protein 2-like OS=Homo sapiens OX=9606 GN=UBAP2L PE=1 SV=2
P27144	43	6	6		16230000	1673500	3720000	25268	Adenylate kinase 4 mitochondrial OS=Homo sapiens OX=9606 GN=AK4 PE=1 SV=1
Q92616	42	98	98	Acetylation (Protein N-term)	323260000	571700000	480990000	292756	eIF-2-alpha kinase activator GCN1 OS=Homo sapiens OX=9606 GN=GCN1 PE=1 SV=6
Q15437	15	7	5	Oxidation (M); Acetylation (Protein N-term)	3105500	5993300	16176000	86479	Protein transport protein Sec23B OS=Homo sapiens OX=9606 GN=SEC23B PE=1 SV=2
P22307	15	8	8		42816000	116920000	95518000	58994	Sterol carrier protein 2 OS=Homo sapiens OX=9606 GN=SCP2 PE=1 SV=2
Q13362	7	2	2		2093400	87590	2336000	61061	Serine/threonine-protein phosphatase 2A 56 kDa regulatory subunit gamma isoform OS=Homo sapiens OX=9606 GN=PPP2R5C PE=1 SV=3
Q7Z4H8	7	3	3		535140	72653	56042	58573	Protein O-glucosyltransferase 3 OS=Homo sapiens OX=9606 GN=POGLUT3 PE=1 SV=2
P04406	86	105	103	Oxidation (M)	18147000000	24152000000	26400000000	36053	Glyceraldehyde-3-phosphate dehydrogenase OS=Homo sapiens OX=9606 GN=GAPDH PE=1 SV=3
Q9NY93	52	20	20	Acetylation (Protein N-term)	94710000	232150000	179900000	61590	Probable ATP-dependent RNA helicase DDX56 OS=Homo sapiens OX=9606 GN=DDX56 PE=1 SV=1
P62942	39	4	4		78733000	173750000	58823000	11951	Peptidyl-prolyl cis-trans isomerase FKBP1A OS=Homo sapiens OX=9606 GN=FKBP1A PE=1 SV=2
Q9BYT8	8	4	3		2043000	318950	461720	80652	Neurolysin mitochondrial OS=Homo sapiens OX=9606 GN=NLN PE=1 SV=1
P43304	41	21	21		87081000	67838000	85665000	80853	Glycerol-3-phosphate dehydrogenase mitochondrial OS=Homo sapiens OX=9606 GN=GPD2 PE=1 SV=3
Q9P2N5	14	9	8		9809700	19065000	25570000	118718	RNA-binding protein 27 OS=Homo sapiens OX=9606 GN=RBM27 PE=1 SV=2
P57740	25	18	18		79940000	108050000	61949000	106374	Nuclear pore complex protein Nup107 OS=Homo sapiens OX=9606 GN=NUP107 PE=1 SV=1
P20290	60	16	15		246660000	259020000	269830000	22168	Transcription factor BTF3 OS=Homo sapiens OX=9606 GN=BTF3 PE=1 SV=1
Q6IAN0	9	2	2		1394000	0	647830	35119	Dehydrogenase/reductase SDR family member 7B OS=Homo sapiens OX=9606 GN=DHRS7B PE=1 SV=2
Q05048	27	7	7		28326000	79519000	60618000	48358	Cleavage stimulation factor subunit 1 OS=Homo sapiens OX=9606 GN=CSTF1 PE=1 SV=1
P53041	10	3	3		8422400	1881500	5098900	56879	Serine/threonine-protein phosphatase 5 OS=Homo sapiens OX=9606 GN=PPP5C PE=1 SV=1
P49916	8	6	6		12923000	13160000	4438800	112907	DNA ligase 3 OS=Homo sapiens OX=9606 GN=LIG3 PE=1 SV=2
Q9NRW7	9	4	4		3440500	676450	2900500	65077	Vacuolar protein sorting-associated protein 45 OS=Homo sapiens OX=9606 GN=VPS45 PE=1 SV=1
Q969G3	43	11	11		46987000	54599000	22942000	46649	SWI/SNF-related matrix-associated actin-dependent regulator of chromatin subfamily E member 1 OS=Homo sapiens OX=9606 GN=SMARCE1 PE=1 SV=2
P11387	40	35	35	Acetylation (Protein N-term)	312380000	1027100000	753350000	90726	DNA topoisomerase 1 OS=Homo sapiens OX=9606 GN=TOP1 PE=1 SV=2
P49721	34	6	6	Acetylation (Protein N-term)	59067000	15590000	14706000	22836	Proteasome subunit beta type-2 OS=Homo sapiens OX=9606 GN=PSMB2 PE=1 SV=1
P62314	38	4	4		103120000	32867000	34489000	13282	Small nuclear ribonucleoprotein Sm D1 OS=Homo sapiens OX=9606 GN=SNRPD1 PE=1 SV=1
Q16513	15	9	9		26556000	25054000	15559000	112035	Serine/threonine-protein kinase N2 OS=Homo sapiens OX=9606 GN=PKN2 PE=1 SV=1
Q9ULV4	21	7	7		44085000	126890000	62142000	53249	Coronin-1C OS=Homo sapiens OX=9606 GN=CORO1C PE=1 SV=1
Q86V48	5	4	4		7471200	59471000	3627400	120275	Leucine zipper protein 1 OS=Homo sapiens OX=9606 GN=LUZP1 PE=1 SV=2
Q9H299	47	4	4		30743000	55123000	87165000	10438	SH3 domain-binding glutamic acid-rich-like protein 3 OS=Homo sapiens OX=9606 GN=SH3BGRL3 PE=1 SV=1
P0DMN0	35	8	5	Oxidation (M); Acetylation (Protein N-term)	4811200	14410000	26953000	34196	Sulfotransferase 1A4 OS=Homo sapiens OX=9606 GN=SULT1A4 PE=1 SV=1
P0DMM9	35	8	5	Oxidation (M); Acetylation (Protein N-term)	4811200	14410000	26953000	34196	Sulfotransferase 1A3 OS=Homo sapiens OX=9606 GN=SULT1A3 PE=1 SV=1
Q9NQ88	24	4	4		7627800	36433000	13774000	30063	Fructose-2 6-bisphosphatase TIGAR OS=Homo sapiens OX=9606 GN=TIGAR PE=1 SV=1
Q9NX62	16	2	2		8110000	336870	3991300	38681	Golgi-resident adenosine 3' 5'-bisphosphate 3'-phosphatase OS=Homo sapiens OX=9606 GN=BPNT2 PE=1 SV=1
Q15942	37	14	14		118980000	195540000	341020000	61277	Zyxin OS=Homo sapiens OX=9606 GN=ZYX PE=1 SV=1
P02786	52	43	43	Oxidation (M)	18771000000	5001900000	1053800000	84871	Transferrin receptor protein 1 OS=Homo sapiens OX=9606 GN=TFRC PE=1 SV=2
Q96CP2	32	3	3		16417000	80179000	57712000	14564	FLYWCH family member 2 OS=Homo sapiens OX=9606 GN=FLYWCH2 PE=1 SV=1
Q01581	25	9	9		27060000	111300000	101730000	57294	Hydroxymethylglutaryl-CoA synthase cytoplasmic OS=Homo sapiens OX=9606 GN=HMGCS1 PE=1 SV=2
P53597	18	5	5		15885000	71298000	34935000	36250	Succinate--CoA ligase [ADP/GDP-forming] subunit alpha mitochondrial OS=Homo sapiens OX=9606 GN=SUCLG1 PE=1 SV=4
Q96S66	27	10	10		3245900	18327000	8720700	62023	Chloride channel CLIC-like protein 1 OS=Homo sapiens OX=9606 GN=CLCC1 PE=1 SV=1
Q5T653	15	2	2		2037300	732590	5311000	33301	39S ribosomal protein L2 mitochondrial OS=Homo sapiens OX=9606 GN=MRPL2 PE=1 SV=2
O94973	16	10	5		988880	3358800	4654600	103960	AP-2 complex subunit alpha-2 OS=Homo sapiens OX=9606 GN=AP2A2 PE=1 SV=2
Q99797	5	2	2		760720	0	380640	80641	Mitochondrial intermediate peptidase OS=Homo sapiens OX=9606 GN=MIPEP PE=1 SV=2
Q9Y2U8	6	3	3	Acetylation (Protein N-term)	6527400	1118000	3386100	99997	Inner nuclear membrane protein Man1 OS=Homo sapiens OX=9606 GN=LEMD3 PE=1 SV=2
Q16658	54	31	31		424250000	1458300000	1301500000	54530	Fascin OS=Homo sapiens OX=9606 GN=FSCN1 PE=1 SV=3
P50897	14	3	3		10845000	41446000	58495000	34193	Palmitoyl-protein thioesterase 1 OS=Homo sapiens OX=9606 GN=PPT1 PE=1 SV=1
O00151	64	16	16	Acetylation (Protein N-term)	108540000	256330000	273670000	36072	PDZ and LIM domain protein 1 OS=Homo sapiens OX=9606 GN=PDLIM1 PE=1 SV=4
P52895	32	12	2	Oxidation (M)	43139000	36266000	60694000	36735	Aldo-keto reductase family 1 member C2 OS=Homo sapiens OX=9606 GN=AKR1C2 PE=1 SV=3
Q32P28	22	8	8		14549000	11354000	20301000	83394	Prolyl 3-hydroxylase 1 OS=Homo sapiens OX=9606 GN=P3H1 PE=1 SV=2
Q9Y394	10	2	2		1865900	26755	806410	38299	Dehydrogenase/reductase SDR family member 7 OS=Homo sapiens OX=9606 GN=DHRS7 PE=1 SV=1
P61586	44	9	6	Oxidation (M)	42699000	288490000	198260000	21768	Transforming protein RhoA OS=Homo sapiens OX=9606 GN=RHOA PE=1 SV=1
Q15738	47	11	11	Acetylation (Protein N-term)	43733000	31995000	44046000	41900	Sterol-4-alpha-carboxylate 3-dehydrogenase decarboxylating OS=Homo sapiens OX=9606 GN=NSDHL PE=1 SV=2
Q5SSJ5	40	20	20	Acetylation (Protein N-term)	151550000	156290000	139100000	61207	Heterochromatin protein 1-binding protein 3 OS=Homo sapiens OX=9606 GN=HP1BP3 PE=1 SV=1
P29353	20	7	7		6637100	24009000	28426000	62822	SHC-transforming protein 1 OS=Homo sapiens OX=9606 GN=SHC1 PE=1 SV=4
Q9NYY8	4	2	2		0	269580	0	81463	FAST kinase domain-containing protein 2 mitochondrial OS=Homo sapiens OX=9606 GN=FASTKD2 PE=1 SV=1
P63244	52	30	30	Oxidation (M); Acetylation (Protein N-term)	829580000	1740000000	1682500000	35077	Receptor of activated protein C kinase 1 OS=Homo sapiens OX=9606 GN=RACK1 PE=1 SV=3
Q06203	22	9	9		40970000	63746000	39639000	57399	Amidophosphoribosyltransferase OS=Homo sapiens OX=9606 GN=PPAT PE=1 SV=1
P41214	18	7	7		3789100	7944400	12579000	64707	Eukaryotic translation initiation factor 2D OS=Homo sapiens OX=9606 GN=EIF2D PE=1 SV=3
Q15654	27	6	6	Acetylation (Protein N-term)	25163000	133130000	122630000	50288	Thyroid receptor-interacting protein 6 OS=Homo sapiens OX=9606 GN=TRIP6 PE=1 SV=3
P78345	14	3	3		6300700	45190000	56400000	31834	Ribonuclease P protein subunit p38 OS=Homo sapiens OX=9606 GN=RPP38 PE=1 SV=2
Q86WB0	10	3	3		1987400	10414000	5993300	55262	Nuclear-interacting partner of ALK OS=Homo sapiens OX=9606 GN=ZC3HC1 PE=1 SV=1
Q8IVF2	9	36	33		145540000	235710000	590880000	616641	Protein AHNAK2 OS=Homo sapiens OX=9606 GN=AHNAK2 PE=1 SV=2
O60828	37	7	7		35315000	29030000	63360000	30472	Polyglutamine-binding protein 1 OS=Homo sapiens OX=9606 GN=PQBP1 PE=1 SV=1
P0DP24	61	17	17	Oxidation (M); Acetylation (Protein N-term)	919080000	1994600000	1829800000	16838	Calmodulin-2 OS=Homo sapiens OX=9606 GN=CALM2 PE=1 SV=1
P0DP23	61	17	17	Oxidation (M); Acetylation (Protein N-term)	919080000	1994600000	1829800000	16838	Calmodulin-1 OS=Homo sapiens OX=9606 GN=CALM1 PE=1 SV=1
P0DP25	61	17	17	Oxidation (M); Acetylation (Protein N-term)	919080000	1994600000	1829800000	16838	Calmodulin-3 OS=Homo sapiens OX=9606 GN=CALM3 PE=1 SV=1
Q13177	45	17	17	Oxidation (M); Acetylation (Protein N-term)	75170000	188210000	184940000	58043	Serine/threonine-protein kinase PAK 2 OS=Homo sapiens OX=9606 GN=PAK2 PE=1 SV=3
Q9Y446	20	11	11		41178000	15100000	19655000	87082	Plakophilin-3 OS=Homo sapiens OX=9606 GN=PKP3 PE=1 SV=1
Q9BVC6	9	3	3		17661000	80615000	66215000	26210	Transmembrane protein 109 OS=Homo sapiens OX=9606 GN=TMEM109 PE=1 SV=1
Q96T58	2	4	4		582630	4695300	2824900	402251	Msx2-interacting protein OS=Homo sapiens OX=9606 GN=SPEN PE=1 SV=1
Q16644	14	3	3	Acetylation (Protein N-term)	57917000	4429600	4487400	42987	MAP kinase-activated protein kinase 3 OS=Homo sapiens OX=9606 GN=MAPKAPK3 PE=1 SV=1
P53350	10	3	3		10742000	4322700	2326500	68255	Serine/threonine-protein kinase PLK1 OS=Homo sapiens OX=9606 GN=PLK1 PE=1 SV=1
Q5QJE6	33	19	19		45578000	91976000	172720000	84469	Deoxynucleotidyltransferase terminal-interacting protein 2 OS=Homo sapiens OX=9606 GN=DNTTIP2 PE=1 SV=2
Q96JJ3	2	1	1		1025000	35306	706330	82615	Engulfment and cell motility protein 2 OS=Homo sapiens OX=9606 GN=ELMO2 PE=1 SV=2
O94992	14	3	3		5201800	34212000	33402000	40623	Protein HEXIM1 OS=Homo sapiens OX=9606 GN=HEXIM1 PE=1 SV=1
Q9NUQ9	47	15	15		62474000	92600000	171040000	36748	CYFIP-related Rac1 interactor B OS=Homo sapiens OX=9606 GN=CYRIB PE=1 SV=1
Q14376	17	4	4		3981200	15739000	17036000	38282	UDP-glucose 4-epimerase OS=Homo sapiens OX=9606 GN=GALE PE=1 SV=2
P30154	17	8	4		4717000	9640400	23031000	66214	Serine/threonine-protein phosphatase 2A 65 kDa regulatory subunit A beta isoform OS=Homo sapiens OX=9606 GN=PPP2R1B PE=1 SV=3
O15116	44	4	4	Acetylation (Protein N-term)	4868600	7435200	32974000	15179	U6 snRNA-associated Sm-like protein LSm1 OS=Homo sapiens OX=9606 GN=LSM1 PE=1 SV=1
Q6KC79	4	8	8		3318900	6766600	4836600	316051	Nipped-B-like protein OS=Homo sapiens OX=9606 GN=NIPBL PE=1 SV=2
Q05D32	12	4	4		6440000	17060000	5408700	52999	CTD small phosphatase-like protein 2 OS=Homo sapiens OX=9606 GN=CTDSPL2 PE=1 SV=2
P42166	47	27	14		68303000	205060000	174530000	75492	Lamina-associated polypeptide 2 isoform alpha OS=Homo sapiens OX=9606 GN=TMPO PE=1 SV=2
Q08752	12	3	3	Acetylation (Protein N-term)	6675100	44330000	45356000	40764	Peptidyl-prolyl cis-trans isomerase D OS=Homo sapiens OX=9606 GN=PPID PE=1 SV=3
Q9BQ61	15	3	3		27011000	10109000	18169000	18419	Telomerase RNA component interacting RNase OS=Homo sapiens OX=9606 GN=TRIR PE=1 SV=1
P53396	52	56	56	Oxidation (M)	1194700000	938250000	1150400000	120839	ATP-citrate synthase OS=Homo sapiens OX=9606 GN=ACLY PE=1 SV=3
Q96EL3	29	2	2		1015400	10070000	6715400	12107	39S ribosomal protein L53 mitochondrial OS=Homo sapiens OX=9606 GN=MRPL53 PE=1 SV=1
Q96GK7	14	3	3		594390	4222900	2901700	34596	Fumarylacetoacetate hydrolase domain-containing protein 2A OS=Homo sapiens OX=9606 GN=FAHD2A PE=1 SV=1
P49591	40	16	16		56514000	89379000	125770000	58777	Serine--tRNA ligase cytoplasmic OS=Homo sapiens OX=9606 GN=SARS1 PE=1 SV=3
Q9Y639	10	3	3		27276000	115140000	109500000	44387	Neuroplastin OS=Homo sapiens OX=9606 GN=NPTN PE=1 SV=2
Q08257	25	7	7		21097000	64376000	44828000	35207	Quinone oxidoreductase OS=Homo sapiens OX=9606 GN=CRYZ PE=1 SV=1
Q16543	45	16	16	Oxidation (M); Acetylation (Protein N-term)	1549600000	377150000	269540000	44468	Hsp90 co-chaperone Cdc37 OS=Homo sapiens OX=9606 GN=CDC37 PE=1 SV=1
Q96SB4	22	11	9		86318000	42516000	85046000	74325	SRSF protein kinase 1 OS=Homo sapiens OX=9606 GN=SRPK1 PE=1 SV=2
Q92900	39	34	34		75052000	171640000	191860000	124345	Regulator of nonsense transcripts 1 OS=Homo sapiens OX=9606 GN=UPF1 PE=1 SV=2
Q15477	9	8	8		7006000	12323000	11538000	137755	Helicase SKI2W OS=Homo sapiens OX=9606 GN=SKIV2L PE=1 SV=3
O43818	12	4	4		5576400	18212000	4473500	51841	U3 small nucleolar RNA-interacting protein 2 OS=Homo sapiens OX=9606 GN=RRP9 PE=1 SV=1
Q9NPF4	12	3	3		8028300	27050000	10089000	36427	Probable tRNA N6-adenosine threonylcarbamoyltransferase OS=Homo sapiens OX=9606 GN=OSGEP PE=1 SV=1
Q93009	25	20	20		30308000	84693000	68541000	128302	Ubiquitin carboxyl-terminal hydrolase 7 OS=Homo sapiens OX=9606 GN=USP7 PE=1 SV=2
Q9UMR2	41	16	3	Acetylation (Protein N-term)	4409500	635190	2930100	53927	ATP-dependent RNA helicase DDX19B OS=Homo sapiens OX=9606 GN=DDX19B PE=1 SV=1
Q9H4A4	32	19	19	Acetylation (Protein N-term)	52875000	158740000	158230000	72596	Aminopeptidase B OS=Homo sapiens OX=9606 GN=RNPEP PE=1 SV=2
Q96K76	14	13	13		9907500	31239000	26600000	157311	Ubiquitin carboxyl-terminal hydrolase 47 OS=Homo sapiens OX=9606 GN=USP47 PE=1 SV=3
O94842	9	3	3		3768800	12256000	23812000	66195	TOX high mobility group box family member 4 OS=Homo sapiens OX=9606 GN=TOX4 PE=1 SV=1
O75369	56	138	119		2182700000	1293200000	1487800000	278162	Filamin-B OS=Homo sapiens OX=9606 GN=FLNB PE=1 SV=2
Q9BY44	48	21	21		131790000	312050000	314810000	64990	Eukaryotic translation initiation factor 2A OS=Homo sapiens OX=9606 GN=EIF2A PE=1 SV=3
P46977	14	11	11		19601000	36853000	22793000	80530	Dolichyl-diphosphooligosaccharide--protein glycosyltransferase subunit STT3A OS=Homo sapiens OX=9606 GN=STT3A PE=1 SV=2
Q5VT79	30	7	7		57975000	12052000	28031000	36879	Annexin A8-like protein 1 OS=Homo sapiens OX=9606 GN=ANXA8L1 PE=2 SV=2
Q6YHK3	13	14	14		13193000	52065000	54533000	161688	CD109 antigen OS=Homo sapiens OX=9606 GN=CD109 PE=1 SV=2
Q14789	8	18	18		12110000	19997000	29905000	376019	Golgin subfamily B member 1 OS=Homo sapiens OX=9606 GN=GOLGB1 PE=1 SV=2
Q13671	3	2	2		71597	730240	12450000	84099	Ras and Rab interactor 1 OS=Homo sapiens OX=9606 GN=RIN1 PE=1 SV=4
Q9P015	34	8	8		7101600	35094000	37340000	33420	39S ribosomal protein L15 mitochondrial OS=Homo sapiens OX=9606 GN=MRPL15 PE=1 SV=1
P62995	37	14	12	Acetylation (Protein N-term)	48497000	127940000	59291000	33666	Transformer-2 protein homolog beta OS=Homo sapiens OX=9606 GN=TRA2B PE=1 SV=1
O95486	6	4	4		3945800	6875900	12572000	119749	Protein transport protein Sec24A OS=Homo sapiens OX=9606 GN=SEC24A PE=1 SV=2
Q4G176	14	4	4		931700	128040	246420	64130	Malonate--CoA ligase ACSF3 mitochondrial OS=Homo sapiens OX=9606 GN=ACSF3 PE=1 SV=3
O75368	77	7	7		94848000	15018000	31864000	12774	SH3 domain-binding glutamic acid-rich-like protein OS=Homo sapiens OX=9606 GN=SH3BGRL PE=1 SV=1
P30043	54	13	13		102710000	264510000	304390000	22119	Flavin reductase (NADPH) OS=Homo sapiens OX=9606 GN=BLVRB PE=1 SV=3
P41236	57	8	8	Acetylation (Protein N-term)	18207000	78606000	55375000	23015	Protein phosphatase inhibitor 2 OS=Homo sapiens OX=9606 GN=PPP1R2 PE=1 SV=2
Q9UK76	65	6	6		96939000	190720000	262850000	16015	Jupiter microtubule associated homolog 1 OS=Homo sapiens OX=9606 GN=JPT1 PE=1 SV=3
P01889	26	8	2		117120000	21592000	29928000	40460	HLA class I histocompatibility antigen B alpha chain OS=Homo sapiens OX=9606 GN=HLA-B PE=1 SV=3
P13639	54	82	81	Oxidation (M)	3234200000	6788400000	6155200000	95338	Elongation factor 2 OS=Homo sapiens OX=9606 GN=EEF2 PE=1 SV=4
Q9BTX1	20	10	10		49954000	114350000	49024000	76305	Nucleoporin NDC1 OS=Homo sapiens OX=9606 GN=NDC1 PE=1 SV=2
Q9H6R4	24	20	20		121490000	80872000	161440000	127593	Nucleolar protein 6 OS=Homo sapiens OX=9606 GN=NOL6 PE=1 SV=2
Q93074	2	3	3		205000	875830	1386300	243079	Mediator of RNA polymerase II transcription subunit 12 OS=Homo sapiens OX=9606 GN=MED12 PE=1 SV=4
Q13509	62	57	7	Carbamidomethylation; Oxidation (M)	29317000	21646000	38242000	50433	Tubulin beta-3 chain OS=Homo sapiens OX=9606 GN=TUBB3 PE=1 SV=2
O95251	10	4	4		5987400	16614000	7414600	70642	Histone acetyltransferase KAT7 OS=Homo sapiens OX=9606 GN=KAT7 PE=1 SV=1
P53999	68	17	17	Oxidation (M)	930130000	1152800000	756710000	14395	Activated RNA polymerase II transcriptional coactivator p15 OS=Homo sapiens OX=9606 GN=SUB1 PE=1 SV=3
Q6P1L8	23	2	2		2131200	58020000	35247000	15948	39S ribosomal protein L14 mitochondrial OS=Homo sapiens OX=9606 GN=MRPL14 PE=1 SV=1
P18124	59	39	39	Carbamidomethylation	955900000	1563500000	1274300000	29226	60S ribosomal protein L7 OS=Homo sapiens OX=9606 GN=RPL7 PE=1 SV=1
P25325	30	5	5		4429500	32610000	7159400	33178	3-mercaptopyruvate sulfurtransferase OS=Homo sapiens OX=9606 GN=MPST PE=1 SV=3
O15031	21	22	22		27515000	61274000	78127000	205126	Plexin-B2 OS=Homo sapiens OX=9606 GN=PLXNB2 PE=1 SV=3
Q8WVC0	10	5	5		9156300	25588000	101790000	75404	RNA polymerase-associated protein LEO1 OS=Homo sapiens OX=9606 GN=LEO1 PE=1 SV=1
Q9UHB6	27	18	18		34623000	211750000	156020000	85226	LIM domain and actin-binding protein 1 OS=Homo sapiens OX=9606 GN=LIMA1 PE=1 SV=1
Q9UH65	16	7	7		13743000	33102000	57476000	68998	Switch-associated protein 70 OS=Homo sapiens OX=9606 GN=SWAP70 PE=1 SV=1
P60903	45	9	9	Oxidation (M)	475460000	677370000	843680000	11203	Protein S100-A10 OS=Homo sapiens OX=9606 GN=S100A10 PE=1 SV=2
P42330	46	19	10	Oxidation (M)	166120000	69423000	102970000	36853	Aldo-keto reductase family 1 member C3 OS=Homo sapiens OX=9606 GN=AKR1C3 PE=1 SV=4
Q8TAE8	40	6	6	Acetylation (Protein N-term)	23713000	19692000	37529000	25384	Growth arrest and DNA damage-inducible proteins-interacting protein 1 OS=Homo sapiens OX=9606 GN=GADD45GIP1 PE=1 SV=1
P06703	49	9	8	Oxidation (M)	1756200000	1125600000	695990000	10180	Protein S100-A6 OS=Homo sapiens OX=9606 GN=S100A6 PE=1 SV=1
P56134	26	2	2		17810000	1105800	1384700	10918	ATP synthase subunit f mitochondrial OS=Homo sapiens OX=9606 GN=ATP5MF PE=1 SV=3
Q9GZS1	9	3	3	Acetylation (Protein N-term)	2782300	2625800	7496800	47260	DNA-directed RNA polymerase I subunit RPA49 OS=Homo sapiens OX=9606 GN=POLR1E PE=1 SV=3
P06454	55	12	12	Acetylation (Protein N-term)	1746500000	2041200000	1904200000	12203	Prothymosin alpha OS=Homo sapiens OX=9606 GN=PTMA PE=1 SV=2
Q7KZ85	28	34	34		168030000	168390000	318560000	199071	Transcription elongation factor SPT6 OS=Homo sapiens OX=9606 GN=SUPT6H PE=1 SV=2
Q9NQ29	17	6	3		9726000	44886000	51092000	43728	Putative RNA-binding protein Luc7-like 1 OS=Homo sapiens OX=9606 GN=LUC7L PE=1 SV=1
Q9Y2R9	38	10	10		47657000	29289000	75071000	28134	28S ribosomal protein S7 mitochondrial OS=Homo sapiens OX=9606 GN=MRPS7 PE=1 SV=2
Q15014	37	9	8		22907000	31454000	15513000	32308	Mortality factor 4-like protein 2 OS=Homo sapiens OX=9606 GN=MORF4L2 PE=1 SV=1
Q9HCS7	12	7	7		16753000	12978000	18269000	100010	Pre-mRNA-splicing factor SYF1 OS=Homo sapiens OX=9606 GN=XAB2 PE=1 SV=2
Q9Y3Z3	7	3	3		7565700	30355000	5724900	72201	Deoxynucleoside triphosphate triphosphohydrolase SAMHD1 OS=Homo sapiens OX=9606 GN=SAMHD1 PE=1 SV=2
Q96AG4	33	14	14		197720000	293880000	225040000	34930	Leucine-rich repeat-containing protein 59 OS=Homo sapiens OX=9606 GN=LRRC59 PE=1 SV=1
P23528	60	23	11	Acetylation (Protein N-term)	1509500000	1612100000	1814500000	18502	Cofilin-1 OS=Homo sapiens OX=9606 GN=CFL1 PE=1 SV=3
Q9H2W6	35	7	7		6470800	45227000	38029000	31705	39S ribosomal protein L46 mitochondrial OS=Homo sapiens OX=9606 GN=MRPL46 PE=1 SV=1
Q9BRT6	33	5	5		37976000	16198000	23938000	15225	Protein LLP homolog OS=Homo sapiens OX=9606 GN=LLPH PE=1 SV=1
Q1ED39	34	12	12		51207000	124480000	83580000	51589	Lysine-rich nucleolar protein 1 OS=Homo sapiens OX=9606 GN=KNOP1 PE=1 SV=1
O60488	28	14	11		23352000	89850000	76043000	79188	Long-chain-fatty-acid--CoA ligase 4 OS=Homo sapiens OX=9606 GN=ACSL4 PE=1 SV=2
P20338	19	5	3		2316500	10177000	14674000	24390	Ras-related protein Rab-4A OS=Homo sapiens OX=9606 GN=RAB4A PE=1 SV=3
Q9H6T3	15	7	7		5352000	29787000	26363000	75719	RNA polymerase II-associated protein 3 OS=Homo sapiens OX=9606 GN=RPAP3 PE=1 SV=2
P67812	7	2	2		528180	226180	831990	20625	Signal peptidase complex catalytic subunit SEC11A OS=Homo sapiens OX=9606 GN=SEC11A PE=1 SV=1
P61964	36	8	8	Acetylation (Protein N-term)	21424000	88319000	113510000	36589	WD repeat-containing protein 5 OS=Homo sapiens OX=9606 GN=WDR5 PE=1 SV=1
P13674	42	13	13		49143000	50500000	34823000	61049	Prolyl 4-hydroxylase subunit alpha-1 OS=Homo sapiens OX=9606 GN=P4HA1 PE=1 SV=2
P82914	7	2	2		2407500	15320000	9833500	29842	28S ribosomal protein S15 mitochondrial OS=Homo sapiens OX=9606 GN=MRPS15 PE=1 SV=1
Q8IYB8	8	5	5		6091800	18459000	21039000	87991	ATP-dependent RNA helicase SUPV3L1 mitochondrial OS=Homo sapiens OX=9606 GN=SUPV3L1 PE=1 SV=1
P36957	31	12	12		40374000	88176000	66034000	48755	Dihydrolipoyllysine-residue succinyltransferase component of 2-oxoglutarate dehydrogenase complex mitochondrial OS=Homo sapiens OX=9606 GN=DLST PE=1 SV=4
Q8N726	20	2	2		7124000	0	0	13903	Tumor suppressor ARF OS=Homo sapiens OX=9606 GN=CDKN2A PE=1 SV=2
P28074	41	12	11		153590000	292910000	239130000	28480	Proteasome subunit beta type-5 OS=Homo sapiens OX=9606 GN=PSMB5 PE=1 SV=3
Q9NVM9	5	3	3		3893200	7299000	1863900	80225	Integrator complex subunit 13 OS=Homo sapiens OX=9606 GN=INTS13 PE=1 SV=2
P19022	10	5	5		10754000	7694400	2532600	99809	Cadherin-2 OS=Homo sapiens OX=9606 GN=CDH2 PE=1 SV=4
Q5VW32	24	6	6		11454000	45519000	38454000	46476	BRO1 domain-containing protein BROX OS=Homo sapiens OX=9606 GN=BROX PE=1 SV=1
P24752	48	17	17		81806000	233070000	220040000	45200	Acetyl-CoA acetyltransferase mitochondrial OS=Homo sapiens OX=9606 GN=ACAT1 PE=1 SV=1
O95239	11	11	11		16329000	29614000	43226000	139881	Chromosome-associated kinesin KIF4A OS=Homo sapiens OX=9606 GN=KIF4A PE=1 SV=3
Q9P031	9	2	2		2745800	41748000	43810000	28670	Thyroid transcription factor 1-associated protein 26 OS=Homo sapiens OX=9606 GN=CCDC59 PE=1 SV=2
Q06265	10	4	4		22642000	76731000	76156000	48949	Exosome complex component RRP45 OS=Homo sapiens OX=9606 GN=EXOSC9 PE=1 SV=3
Q9NTZ6	13	10	10		33109000	87590000	82828000	97396	RNA-binding protein 12 OS=Homo sapiens OX=9606 GN=RBM12 PE=1 SV=1
Q00577	20	4	4		23043000	10239000	21353000	34911	Transcriptional activator protein Pur-alpha OS=Homo sapiens OX=9606 GN=PURA PE=1 SV=2
Q6PKG0	49	37	34	Acetylation (Protein N-term)	193960000	224050000	128150000	123510	La-related protein 1 OS=Homo sapiens OX=9606 GN=LARP1 PE=1 SV=2
P49821	16	5	5		3794300	17955000	18846000	50817	NADH dehydrogenase [ubiquinone] flavoprotein 1 mitochondrial OS=Homo sapiens OX=9606 GN=NDUFV1 PE=1 SV=4
Q96JY6	6	1	1		0	4896300	4841900	37459	PDZ and LIM domain protein 2 OS=Homo sapiens OX=9606 GN=PDLIM2 PE=1 SV=1
O95249	23	4	4	Acetylation (Protein N-term)	2921400	17778000	6674200	28613	Golgi SNAP receptor complex member 1 OS=Homo sapiens OX=9606 GN=GOSR1 PE=1 SV=1
Q9UNL2	8	2	2		18030000	39422000	63714000	21080	Translocon-associated protein subunit gamma OS=Homo sapiens OX=9606 GN=SSR3 PE=1 SV=1
Q7Z3B4	14	5	5		4550400	13362000	17337000	55436	Nucleoporin p54 OS=Homo sapiens OX=9606 GN=NUP54 PE=1 SV=2
P56937	6	2	2		1560900	16819000	2667200	38206	3-keto-steroid reductase/17-beta-hydroxysteroid dehydrogenase 7 OS=Homo sapiens OX=9606 GN=HSD17B7 PE=1 SV=1
P09211	65	27	27	Oxidation (M)	1340400000	1116800000	1828900000	23356	Glutathione S-transferase P OS=Homo sapiens OX=9606 GN=GSTP1 PE=1 SV=2
P52272	74	63	62	Carbamidomethylation; Oxidation (M); Acetylation (Protein N-term)	1180400000	1517500000	1477900000	77516	Heterogeneous nuclear ribonucleoprotein M OS=Homo sapiens OX=9606 GN=HNRNPM PE=1 SV=3
Q9NQP4	37	4	4		22215000	138610000	37457000	15314	Prefoldin subunit 4 OS=Homo sapiens OX=9606 GN=PFDN4 PE=1 SV=1
P01111	46	9	4		4993700	20353000	21624000	21229	GTPase NRas OS=Homo sapiens OX=9606 GN=NRAS PE=1 SV=1
P35030	10	10	3		1217100000	471290000	797910000	32529	Trypsin-3 OS=Homo sapiens OX=9606 GN=PRSS3 PE=1 SV=2
P14866	49	31	31	Oxidation (M)	781520000	1167600000	1302200000	64133	Heterogeneous nuclear ribonucleoprotein L OS=Homo sapiens OX=9606 GN=HNRNPL PE=1 SV=2
O43815	11	5	5		11225000	7098400	15689000	86132	Striatin OS=Homo sapiens OX=9606 GN=STRN PE=1 SV=4
P14406	30	3	3		8984100	21066000	26128000	9396	Cytochrome c oxidase subunit 7A2 mitochondrial OS=Homo sapiens OX=9606 GN=COX7A2 PE=1 SV=1
P24928	19	23	23		26490000	42818000	44773000	217174	DNA-directed RNA polymerase II subunit RPB1 OS=Homo sapiens OX=9606 GN=POLR2A PE=1 SV=2
Q9Y3U8	33	6	6	Carbamidomethylation	102080000	212500000	199060000	12254	60S ribosomal protein L36 OS=Homo sapiens OX=9606 GN=RPL36 PE=1 SV=3
P98175	29	17	17		132620000	186650000	63288000	103533	RNA-binding protein 10 OS=Homo sapiens OX=9606 GN=RBM10 PE=1 SV=3
P49411	58	30	30		329850000	374350000	354750000	49542	Elongation factor Tu mitochondrial OS=Homo sapiens OX=9606 GN=TUFM PE=1 SV=2
Q9H3M7	7	2	2		10624000	79092	586460	43661	Thioredoxin-interacting protein OS=Homo sapiens OX=9606 GN=TXNIP PE=1 SV=1
P46782	44	12	12	Carbamidomethylation; Oxidation (M); Acetylation (Protein N-term)	358040000	357510000	466390000	22876	40S ribosomal protein S5 OS=Homo sapiens OX=9606 GN=RPS5 PE=1 SV=4
P39023	54	40	40	Oxidation (M)	811030000	882120000	775560000	46109	60S ribosomal protein L3 OS=Homo sapiens OX=9606 GN=RPL3 PE=1 SV=2
Q5VWQ0	3	2	2		962310	7694900	3197000	90072	Lysine-specific demethylase 9 OS=Homo sapiens OX=9606 GN=RSBN1 PE=1 SV=2
Q12802	2	4	4		4443500000	1936800	2029400000	307550	A-kinase anchor protein 13 OS=Homo sapiens OX=9606 GN=AKAP13 PE=1 SV=2
P04843	61	34	34		245410000	558050000	448670000	68569	Dolichyl-diphosphooligosaccharide--protein glycosyltransferase subunit 1 OS=Homo sapiens OX=9606 GN=RPN1 PE=1 SV=1
O75794	11	3	3		8837600	23285000	9615300	39135	Cell division cycle protein 123 homolog OS=Homo sapiens OX=9606 GN=CDC123 PE=1 SV=1
O43493	10	3	3		6532600	52864000	37601000	45880	Trans-Golgi network integral membrane protein 2 OS=Homo sapiens OX=9606 GN=TGOLN2 PE=1 SV=4
Q9H3S7	6	5	5		4765300	10835000	16208000	178972	Tyrosine-protein phosphatase non-receptor type 23 OS=Homo sapiens OX=9606 GN=PTPN23 PE=1 SV=1
Q9UNZ2	34	11	11		28995000	100570000	86059000	40573	NSFL1 cofactor p47 OS=Homo sapiens OX=9606 GN=NSFL1C PE=1 SV=2
Q7Z3T8	1	1	1		406420	264020	1411000	168903	Zinc finger FYVE domain-containing protein 16 OS=Homo sapiens OX=9606 GN=ZFYVE16 PE=1 SV=3
Q14134	29	14	14		63937000	175660000	151230000	65835	Tripartite motif-containing protein 29 OS=Homo sapiens OX=9606 GN=TRIM29 PE=1 SV=2
P13498	5	1	1		48676000	11047000	6712500	21013	Cytochrome b-245 light chain OS=Homo sapiens OX=9606 GN=CYBA PE=1 SV=3
P62273	34	3	3		25850000	73700000	96231000	6677	40S ribosomal protein S29 OS=Homo sapiens OX=9606 GN=RPS29 PE=1 SV=2
Q16637	22	4	4	Acetylation (Protein N-term)	8265400	20289000	28760000	31849	Survival motor neuron protein OS=Homo sapiens OX=9606 GN=SMN1 PE=1 SV=1
Q9Y3D7	18	1	1		2707300	94789	0	13825	Mitochondrial import inner membrane translocase subunit TIM16 OS=Homo sapiens OX=9606 GN=PAM16 PE=1 SV=2
P35579	53	130	109	Oxidation (M); Acetylation (Protein N-term)	3186600000	2130200000	2250500000	226530	Myosin-9 OS=Homo sapiens OX=9606 GN=MYH9 PE=1 SV=4
Q6GMV3	38	6	6	Acetylation (Protein N-term)	22528000	18107000	35180000	15805	Putative peptidyl-tRNA hydrolase PTRHD1 OS=Homo sapiens OX=9606 GN=PTRHD1 PE=1 SV=1
Q8WWY3	33	10	10		25956000	40551000	24286000	55456	U4/U6 small nuclear ribonucleoprotein Prp31 OS=Homo sapiens OX=9606 GN=PRPF31 PE=1 SV=2
Q6P3X3	3	2	2		7021200	2169000	918560	96632	Tetratricopeptide repeat protein 27 OS=Homo sapiens OX=9606 GN=TTC27 PE=1 SV=1
Q8NBJ4	20	6	6		43689000	512160000	409140000	45333	Golgi membrane protein 1 OS=Homo sapiens OX=9606 GN=GOLM1 PE=1 SV=1
Q9BRP1	13	3	3		772120	2093500	883940	39417	Programmed cell death protein 2-like OS=Homo sapiens OX=9606 GN=PDCD2L PE=1 SV=1
Q9Y2V2	59	7	7	Acetylation (Protein N-term)	50018000	145950000	161910000	15892	Calcium-regulated heat-stable protein 1 OS=Homo sapiens OX=9606 GN=CARHSP1 PE=1 SV=2
Q14919	22	3	3		11713000	2918300	2977900	22350	Dr1-associated corepressor OS=Homo sapiens OX=9606 GN=DRAP1 PE=1 SV=3
Q9UJX4	5	2	2		4527800	0	1137900	85077	Anaphase-promoting complex subunit 5 OS=Homo sapiens OX=9606 GN=ANAPC5 PE=1 SV=2
Q9UM00	20	5	5		14000000	59334000	45920000	27079	Calcium load-activated calcium channel OS=Homo sapiens OX=9606 GN=TMCO1 PE=1 SV=2
Q8NE86	11	3	3		11064000	41992000	41360000	39867	Calcium uniporter protein mitochondrial OS=Homo sapiens OX=9606 GN=MCU PE=1 SV=1
Q96EK5	15	4	4		41554000	26773000	22075000	71814	KIF-binding protein OS=Homo sapiens OX=9606 GN=KIFBP PE=1 SV=1
Q8N4Q1	17	2	2		6306900	16016000	5416000	15996	Mitochondrial intermembrane space import and assembly protein 40 OS=Homo sapiens OX=9606 GN=CHCHD4 PE=1 SV=1
Q9H2P9	7	2	2		190280	7251800	5619200	31651	Diphthine methyl ester synthase OS=Homo sapiens OX=9606 GN=DPH5 PE=1 SV=2
O75909	10	3	3		5871400	22576000	32903000	64240	Cyclin-K OS=Homo sapiens OX=9606 GN=CCNK PE=1 SV=2
O76024	6	2	2		0	230190	1530100	100291	Wolframin OS=Homo sapiens OX=9606 GN=WFS1 PE=1 SV=2
Q02218	31	20	20		26401000	17391000	17902000	115935	2-oxoglutarate dehydrogenase mitochondrial OS=Homo sapiens OX=9606 GN=OGDH PE=1 SV=3
P62277	56	23	21		422640000	515010000	564350000	17222	40S ribosomal protein S13 OS=Homo sapiens OX=9606 GN=RPS13 PE=1 SV=2
Q9NYB0	16	3	3		1790900	5677200	8273700	44260	Telomeric repeat-binding factor 2-interacting protein 1 OS=Homo sapiens OX=9606 GN=TERF2IP PE=1 SV=1
O94913	2	2	2		0	836520	1552500	173050	Pre-mRNA cleavage complex 2 protein Pcf11 OS=Homo sapiens OX=9606 GN=PCF11 PE=1 SV=3
O94875	3	2	2		2168600	1389200	23023000	124107	Sorbin and SH3 domain-containing protein 2 OS=Homo sapiens OX=9606 GN=SORBS2 PE=1 SV=3
Q9H9H4	13	2	2		1341500	741420	0	31307	Vacuolar protein sorting-associated protein 37B OS=Homo sapiens OX=9606 GN=VPS37B PE=1 SV=1
P10809	82	81	81	Oxidation (M)	2483100000	1503200000	1050500000	61055	60 kDa heat shock protein mitochondrial OS=Homo sapiens OX=9606 GN=HSPD1 PE=1 SV=2
Q9Y3P9	8	6	6		5051400	21301000	15065000	121737	Rab GTPase-activating protein 1 OS=Homo sapiens OX=9606 GN=RABGAP1 PE=1 SV=3
Q96P48	3	3	3	Acetylation (Protein N-term)	17633000	705740	771790	162191	Arf-GAP with Rho-GAP domain ANK repeat and PH domain-containing protein 1 OS=Homo sapiens OX=9606 GN=ARAP1 PE=1 SV=3
P05386	77	7	6	Oxidation (M)	115450000	49268000	95972000	11514	60S acidic ribosomal protein P1 OS=Homo sapiens OX=9606 GN=RPLP1 PE=1 SV=1
Q15050	43	20	20	Oxidation (M); Acetylation (Protein N-term)	101680000	264560000	226690000	41193	Ribosome biogenesis regulatory protein homolog OS=Homo sapiens OX=9606 GN=RRS1 PE=1 SV=2
P61024	66	5	5		29632000	36020000	81684000	9660	Cyclin-dependent kinases regulatory subunit 1 OS=Homo sapiens OX=9606 GN=CKS1B PE=1 SV=1
Q9UK22	8	2	2		170010	1527100	4447000	33328	F-box only protein 2 OS=Homo sapiens OX=9606 GN=FBXO2 PE=1 SV=2
P08238	69	108	63	Oxidation (M)	4059800000	10096000000	9556300000	83264	Heat shock protein HSP 90-beta OS=Homo sapiens OX=9606 GN=HSP90AB1 PE=1 SV=4
Q9UEY8	4	2	2		5647100	523920	286300	79155	Gamma-adducin OS=Homo sapiens OX=9606 GN=ADD3 PE=1 SV=1
P06748	53	32	32	Oxidation (M)	1255800000	2483100000	2172400000	32575	Nucleophosmin OS=Homo sapiens OX=9606 GN=NPM1 PE=1 SV=2
P49005	14	5	5	Acetylation (Protein N-term)	8112800	15239000	8357300	51290	DNA polymerase delta subunit 2 OS=Homo sapiens OX=9606 GN=POLD2 PE=1 SV=1
Q5JTV8	31	11	11		34752000	31321000	73971000	66248	Torsin-1A-interacting protein 1 OS=Homo sapiens OX=9606 GN=TOR1AIP1 PE=1 SV=2
P31327	56	98	94	Oxidation (M)	936770000	1788300000	1605000000	164939	Carbamoyl-phosphate synthase [ammonia] mitochondrial OS=Homo sapiens OX=9606 GN=CPS1 PE=1 SV=2
P06733	74	79	72	Oxidation (M); Acetylation (Protein N-term)	12497000000	6094100000	5135100000	47169	Alpha-enolase OS=Homo sapiens OX=9606 GN=ENO1 PE=1 SV=2
Q9Y4L1	47	40	40		194420000	370460000	273800000	111335	Hypoxia up-regulated protein 1 OS=Homo sapiens OX=9606 GN=HYOU1 PE=1 SV=1
P32969	69	20	20	Carbamidomethylation	152320000	305010000	286980000	21863	60S ribosomal protein L9 OS=Homo sapiens OX=9606 GN=RPL9 PE=1 SV=1
Q00169	9	1	1		2442800	0	724530	31806	Phosphatidylinositol transfer protein alpha isoform OS=Homo sapiens OX=9606 GN=PITPNA PE=1 SV=2
Q13595	20	8	6	Acetylation (Protein N-term)	126920000	43389000	40676000	32689	Transformer-2 protein homolog alpha OS=Homo sapiens OX=9606 GN=TRA2A PE=1 SV=1
O96007	22	3	3		1366600	2449200	824640	20944	Molybdopterin synthase catalytic subunit OS=Homo sapiens OX=9606 GN=MOCS2 PE=1 SV=1
Q04721	1	2	2	Oxidation (M)	701940	84670	0	265403	Neurogenic locus notch homolog protein 2 OS=Homo sapiens OX=9606 GN=NOTCH2 PE=1 SV=3
Q8NBX0	17	6	6		29536000	103790000	85867000	47151	Saccharopine dehydrogenase-like oxidoreductase OS=Homo sapiens OX=9606 GN=SCCPDH PE=1 SV=1
Q8NBN7	29	6	6		13107000	21228000	33894000	35932	Retinol dehydrogenase 13 OS=Homo sapiens OX=9606 GN=RDH13 PE=1 SV=2
Q01650	11	10	10		55765000	142510000	115390000	55010	Large neutral amino acids transporter small subunit 1 OS=Homo sapiens OX=9606 GN=SLC7A5 PE=1 SV=2
O95834	9	4	4		4307300	18172000	13620000	70679	Echinoderm microtubule-associated protein-like 2 OS=Homo sapiens OX=9606 GN=EML2 PE=1 SV=1
P53007	17	5	5		32152000	25803000	54394000	34013	Tricarboxylate transport protein mitochondrial OS=Homo sapiens OX=9606 GN=SLC25A1 PE=1 SV=2
P37837	38	13	13	Acetylation (Protein N-term)	274560000	648090000	580670000	37540	Transaldolase OS=Homo sapiens OX=9606 GN=TALDO1 PE=1 SV=2
P22670	6	2	2		0	1906600	1356500	104758	MHC class II regulatory factor RFX1 OS=Homo sapiens OX=9606 GN=RFX1 PE=1 SV=2
Q9H9L3	20	5	5	Acetylation (Protein N-term)	14566000	53981000	47498000	39154	Interferon-stimulated 20 kDa exonuclease-like 2 OS=Homo sapiens OX=9606 GN=ISG20L2 PE=1 SV=1
Q8IYL3	7	1	1		804470	0	0	25977	UPF0688 protein C1orf174 OS=Homo sapiens OX=9606 GN=C1orf174 PE=1 SV=2
P16401	26	11	9	Acetylation (Protein N-term)	909900000	643000000	479790000	22580	Histone H1.5 OS=Homo sapiens OX=9606 GN=H1-5 PE=1 SV=3
P98082	41	23	23	Acetylation (Protein N-term)	155340000	127160000	158320000	82448	Disabled homolog 2 OS=Homo sapiens OX=9606 GN=DAB2 PE=1 SV=3
Q96HR8	3	1	1		1760600	0	71990	53717	H/ACA ribonucleoprotein complex non-core subunit NAF1 OS=Homo sapiens OX=9606 GN=NAF1 PE=1 SV=2
Q9UPT8	11	7	7		9091000	19320000	13815000	140256	Zinc finger CCCH domain-containing protein 4 OS=Homo sapiens OX=9606 GN=ZC3H4 PE=1 SV=3
P30048	37	14	13		201610000	170830000	177390000	27693	Thioredoxin-dependent peroxide reductase mitochondrial OS=Homo sapiens OX=9606 GN=PRDX3 PE=1 SV=3
P51572	48	14	14	Oxidation (M)	136560000	230580000	177650000	27992	B-cell receptor-associated protein 31 OS=Homo sapiens OX=9606 GN=BCAP31 PE=1 SV=3
Q92917	37	10	10		12403000	32684000	19752000	52229	G-patch domain and KOW motifs-containing protein OS=Homo sapiens OX=9606 GN=GPKOW PE=1 SV=2
A6NHX0	10	2	2		155300	2045600	3105800	36056	Cytosolic arginine sensor for mTORC1 subunit 2 OS=Homo sapiens OX=9606 GN=CASTOR2 PE=1 SV=3
Q92597	40	10	10	Oxidation (M)	22736000	121430000	128370000	42835	Protein NDRG1 OS=Homo sapiens OX=9606 GN=NDRG1 PE=1 SV=1
P22234	34	18	18	Oxidation (M); Acetylation (Protein N-term)	604330000	620830000	577700000	47079	Multifunctional protein ADE2 OS=Homo sapiens OX=9606 GN=PAICS PE=1 SV=3
P35613	24	9	9	Oxidation (M)	240310000	310490000	328250000	42200	Basigin OS=Homo sapiens OX=9606 GN=BSG PE=1 SV=2
P55957	34	4	4		4248400	17088000	14629000	21995	BH3-interacting domain death agonist OS=Homo sapiens OX=9606 GN=BID PE=1 SV=1
Q96EY7	18	8	8		10295000	10691000	7622600	78550	Pentatricopeptide repeat domain-containing protein 3 mitochondrial OS=Homo sapiens OX=9606 GN=PTCD3 PE=1 SV=3
Q00059	40	10	10		127750000	419070000	352820000	29097	Transcription factor A mitochondrial OS=Homo sapiens OX=9606 GN=TFAM PE=1 SV=1
Q6XZF7	1	1	1		623970	0	0	177346	Dynamin-binding protein OS=Homo sapiens OX=9606 GN=DNMBP PE=1 SV=1
O75874	45	19	19		172620000	253100000	237260000	46659	Isocitrate dehydrogenase [NADP] cytoplasmic OS=Homo sapiens OX=9606 GN=IDH1 PE=1 SV=2
Q9NUU7	38	16	3	Acetylation (Protein N-term)	7451700	2954300	13491000	53975	ATP-dependent RNA helicase DDX19A OS=Homo sapiens OX=9606 GN=DDX19A PE=1 SV=1
Q16698	25	6	6		33810000	111330000	74416000	36068	2 4-dienoyl-CoA reductase [(3E)-enoyl-CoA-producing] mitochondrial OS=Homo sapiens OX=9606 GN=DECR1 PE=1 SV=1
P58546	38	5	5		146310000	358670000	357710000	12895	Myotrophin OS=Homo sapiens OX=9606 GN=MTPN PE=1 SV=2
P30044	43	14	14		397700000	371190000	413130000	22086	Peroxiredoxin-5 mitochondrial OS=Homo sapiens OX=9606 GN=PRDX5 PE=1 SV=4
P43246	26	19	19		47209000	112760000	101750000	104743	DNA mismatch repair protein Msh2 OS=Homo sapiens OX=9606 GN=MSH2 PE=1 SV=1
Q9UNM6	51	16	16		105450000	128140000	160830000	42946	26S proteasome non-ATPase regulatory subunit 13 OS=Homo sapiens OX=9606 GN=PSMD13 PE=1 SV=2
Q4G0N4	20	6	6		20456000	58578000	71362000	49433	NAD kinase 2 mitochondrial OS=Homo sapiens OX=9606 GN=NADK2 PE=1 SV=2
Q96GQ7	35	29	27		239390000	971950000	328060000	89835	Probable ATP-dependent RNA helicase DDX27 OS=Homo sapiens OX=9606 GN=DDX27 PE=1 SV=2
Q12965	34	32	32		109130000	190530000	227780000	127062	Unconventional myosin-Ie OS=Homo sapiens OX=9606 GN=MYO1E PE=1 SV=2
P43487	43	8	8		334470000	764530000	862820000	23310	Ran-specific GTPase-activating protein OS=Homo sapiens OX=9606 GN=RANBP1 PE=1 SV=1
Q96IJ6	16	4	4		5452200	11086000	5619300	46291	Mannose-1-phosphate guanyltransferase alpha OS=Homo sapiens OX=9606 GN=GMPPA PE=1 SV=1
P82933	32	11	11		56488000	90283000	20405000	45835	28S ribosomal protein S9 mitochondrial OS=Homo sapiens OX=9606 GN=MRPS9 PE=1 SV=2
P39019	68	19	19	Oxidation (M)	630110000	999880000	906070000	16060	40S ribosomal protein S19 OS=Homo sapiens OX=9606 GN=RPS19 PE=1 SV=2
P42696	29	8	8		18484000	72916000	61896000	48565	RNA-binding protein 34 OS=Homo sapiens OX=9606 GN=RBM34 PE=1 SV=2
P48556	28	7	7	Oxidation (M)	53990000	35398000	48420000	39612	26S proteasome non-ATPase regulatory subunit 8 OS=Homo sapiens OX=9606 GN=PSMD8 PE=1 SV=2
P46013	46	117	117		524950000	689410000	510090000	358695	Proliferation marker protein Ki-67 OS=Homo sapiens OX=9606 GN=MKI67 PE=1 SV=2
Q16822	17	8	8		49962000	56497000	91836000	70699	Phosphoenolpyruvate carboxykinase [GTP] mitochondrial OS=Homo sapiens OX=9606 GN=PCK2 PE=1 SV=4
P30041	74	25	25	Oxidation (M)	845560000	1058200000	1237900000	25035	Peroxiredoxin-6 OS=Homo sapiens OX=9606 GN=PRDX6 PE=1 SV=3
P08708	51	15	15	Oxidation (M)	180810000	234980000	230890000	15550	40S ribosomal protein S17 OS=Homo sapiens OX=9606 GN=RPS17 PE=1 SV=2
P18669	63	28	28	Oxidation (M)	1140900000	2429200000	2990700000	28804	Phosphoglycerate mutase 1 OS=Homo sapiens OX=9606 GN=PGAM1 PE=1 SV=2
O75390	56	19	19		143280000	262530000	220370000	51712	Citrate synthase mitochondrial OS=Homo sapiens OX=9606 GN=CS PE=1 SV=2
Q16718	54	6	6		9333600	9741900	11453000	13459	NADH dehydrogenase [ubiquinone] 1 alpha subcomplex subunit 5 OS=Homo sapiens OX=9606 GN=NDUFA5 PE=1 SV=3
P60981	36	11	10		160150000	167580000	182030000	18506	Destrin OS=Homo sapiens OX=9606 GN=DSTN PE=1 SV=3
P31946	63	32	16	Oxidation (M); Acetylation (Protein N-term)	517570000	1103000000	914280000	28082	14-3-3 protein beta/alpha OS=Homo sapiens OX=9606 GN=YWHAB PE=1 SV=3
P29966	48	11	11		395260000	193220000	143490000	31555	Myristoylated alanine-rich C-kinase substrate OS=Homo sapiens OX=9606 GN=MARCKS PE=1 SV=4
Q99426	20	5	5		125780000	69439000	43219000	27326	Tubulin-folding cofactor B OS=Homo sapiens OX=9606 GN=TBCB PE=1 SV=2
Q9Y4W6	13	7	7		9039900	22437000	30874000	88584	AFG3-like protein 2 OS=Homo sapiens OX=9606 GN=AFG3L2 PE=1 SV=2
Q15185	22	5	5		163710000	209900000	150030000	18697	Prostaglandin E synthase 3 OS=Homo sapiens OX=9606 GN=PTGES3 PE=1 SV=1
P45974	42	32	32	Acetylation (Protein N-term)	212230000	300480000	327510000	95786	Ubiquitin carboxyl-terminal hydrolase 5 OS=Homo sapiens OX=9606 GN=USP5 PE=1 SV=2
Q15386	4	2	2		646570	0	440190	123923	Ubiquitin-protein ligase E3C OS=Homo sapiens OX=9606 GN=UBE3C PE=1 SV=3
O75607	17	2	2	Acetylation (Protein N-term)	17632000	46655000	58184000	19344	Nucleoplasmin-3 OS=Homo sapiens OX=9606 GN=NPM3 PE=1 SV=3
Q10713	28	11	11		36146000	121390000	45239000	58253	Mitochondrial-processing peptidase subunit alpha OS=Homo sapiens OX=9606 GN=PMPCA PE=1 SV=2
P29084	18	3	3		809010	526690	1479500	33044	Transcription initiation factor IIE subunit beta OS=Homo sapiens OX=9606 GN=GTF2E2 PE=1 SV=1
Q6PJT7	13	6	6		4629600	18989000	15312000	82876	Zinc finger CCCH domain-containing protein 14 OS=Homo sapiens OX=9606 GN=ZC3H14 PE=1 SV=1
P31948	51	41	40	Acetylation (Protein N-term)	826590000	1262400000	1085800000	62639	Stress-induced-phosphoprotein 1 OS=Homo sapiens OX=9606 GN=STIP1 PE=1 SV=1
P23258	38	10	10		8516500	16975000	29456000	51170	Tubulin gamma-1 chain OS=Homo sapiens OX=9606 GN=TUBG1 PE=1 SV=2
Q8NBN3	4	2	2		8705700	772180	2508300	63430	Transmembrane protein 87A OS=Homo sapiens OX=9606 GN=TMEM87A PE=1 SV=3
Q00325	35	17	17		137280000	88664000	149700000	40095	Phosphate carrier protein mitochondrial OS=Homo sapiens OX=9606 GN=SLC25A3 PE=1 SV=2
Q9Y6M9	49	6	6	Acetylation (Protein N-term)	35365000	116620000	92707000	21831	NADH dehydrogenase [ubiquinone] 1 beta subcomplex subunit 9 OS=Homo sapiens OX=9606 GN=NDUFB9 PE=1 SV=3
P31930	41	16	15		61853000	188140000	141800000	52646	Cytochrome b-c1 complex subunit 1 mitochondrial OS=Homo sapiens OX=9606 GN=UQCRC1 PE=1 SV=3
P19105	51	11	4	Oxidation (M)	120260000	89520000	95392000	19794	Myosin regulatory light chain 12A OS=Homo sapiens OX=9606 GN=MYL12A PE=1 SV=2
O14950	51	11	4	Oxidation (M)	120260000	89520000	95392000	19779	Myosin regulatory light chain 12B OS=Homo sapiens OX=9606 GN=MYL12B PE=1 SV=2
P08195	52	42	42	Oxidation (M); Acetylation (Protein N-term)	757620000	247850000	286090000	67994	4F2 cell-surface antigen heavy chain OS=Homo sapiens OX=9606 GN=SLC3A2 PE=1 SV=3
Q9NNW7	10	3	3		2321000	8521400	9070900	56507	Thioredoxin reductase 2 mitochondrial OS=Homo sapiens OX=9606 GN=TXNRD2 PE=1 SV=3
Q9Y296	10	2	2		395320	4707100	4072800	24340	Trafficking protein particle complex subunit 4 OS=Homo sapiens OX=9606 GN=TRAPPC4 PE=1 SV=1
P05783	89	80	77	Oxidation (M)	2919100000	3822400000	4155300000	48058	Keratin type I cytoskeletal 18 OS=Homo sapiens OX=9606 GN=KRT18 PE=1 SV=2
Q9P206	6	2	2		457530	187220	471760	107095	Uncharacterized protein KIAA1522 OS=Homo sapiens OX=9606 GN=KIAA1522 PE=1 SV=2
O75821	48	13	13		125060000	136740000	140680000	35611	Eukaryotic translation initiation factor 3 subunit G OS=Homo sapiens OX=9606 GN=EIF3G PE=1 SV=2
P34932	57	44	39	Oxidation (M)	457680000	906210000	857790000	94331	Heat shock 70 kDa protein 4 OS=Homo sapiens OX=9606 GN=HSPA4 PE=1 SV=4
P27797	72	37	37		441110000	1089800000	983960000	48142	Calreticulin OS=Homo sapiens OX=9606 GN=CALR PE=1 SV=1
Q8IZ69	3	1	1		481960	0	118700	68726	tRNA (uracil-5-)-methyltransferase homolog A OS=Homo sapiens OX=9606 GN=TRMT2A PE=1 SV=2
Q15233	69	50	46	Oxidation (M)	1336900000	1904600000	1709100000	54232	Non-POU domain-containing octamer-binding protein OS=Homo sapiens OX=9606 GN=NONO PE=1 SV=4
Q96QR8	41	5	5		12400000	45813000	32477000	33241	Transcriptional activator protein Pur-beta OS=Homo sapiens OX=9606 GN=PURB PE=1 SV=3
Q9NRG9	42	13	13		1046500000	286660000	663690000	59574	Aladin OS=Homo sapiens OX=9606 GN=AAAS PE=1 SV=1
O43396	42	10	10		56924000	94699000	82499000	32251	Thioredoxin-like protein 1 OS=Homo sapiens OX=9606 GN=TXNL1 PE=1 SV=3
Q9H2M9	4	4	4		3565600	10354000	19768000	155984	Rab3 GTPase-activating protein non-catalytic subunit OS=Homo sapiens OX=9606 GN=RAB3GAP2 PE=1 SV=1
Q8NCG7	12	6	6		2469000	1843300	5149300	73732	Diacylglycerol lipase-beta OS=Homo sapiens OX=9606 GN=DAGLB PE=1 SV=2
Q9NTK5	58	21	21		150770000	417660000	262410000	44744	Obg-like ATPase 1 OS=Homo sapiens OX=9606 GN=OLA1 PE=1 SV=2
O95758	34	10	7		11623000	139660000	16765000	59690	Polypyrimidine tract-binding protein 3 OS=Homo sapiens OX=9606 GN=PTBP3 PE=1 SV=2
P21796	72	20	18	Acetylation (Protein N-term)	86125000	224820000	189650000	30773	Voltage-dependent anion-selective channel protein 1 OS=Homo sapiens OX=9606 GN=VDAC1 PE=1 SV=2
P50851	2	3	3		4954300	4555000	4740200	319107	Lipopolysaccharide-responsive and beige-like anchor protein OS=Homo sapiens OX=9606 GN=LRBA PE=1 SV=4
Q9Y2A7	9	8	8		24540000	23777000	25209000	128790	Nck-associated protein 1 OS=Homo sapiens OX=9606 GN=NCKAP1 PE=1 SV=1
Q99590	7	9	9		13985000	14688000	17899000	164651	Protein SCAF11 OS=Homo sapiens OX=9606 GN=SCAF11 PE=1 SV=2
O00499	17	7	7		19567000	33881000	44307000	64699	Myc box-dependent-interacting protein 1 OS=Homo sapiens OX=9606 GN=BIN1 PE=1 SV=1
Q96PC5	5	5	5		5394800	2470000	7480600	159835	Melanoma inhibitory activity protein 2 OS=Homo sapiens OX=9606 GN=MIA2 PE=1 SV=4
P50914	30	12	12		152200000	399300000	232690000	23432	60S ribosomal protein L14 OS=Homo sapiens OX=9606 GN=RPL14 PE=1 SV=4
Q5T4S7	9	29	28		40186000	48598000	64842000	573849	E3 ubiquitin-protein ligase UBR4 OS=Homo sapiens OX=9606 GN=UBR4 PE=1 SV=1
P51570	18	5	5		12101000	32240000	31457000	42272	Galactokinase OS=Homo sapiens OX=9606 GN=GALK1 PE=1 SV=1
Q8IWC1	4	2	2		5146200	910090	601360	98429	MAP7 domain-containing protein 3 OS=Homo sapiens OX=9606 GN=MAP7D3 PE=1 SV=2
Q04917	53	18	11	Oxidation (M); Acetylation (Protein N-term)	204490000	224680000	164940000	28219	14-3-3 protein eta OS=Homo sapiens OX=9606 GN=YWHAH PE=1 SV=4
O75494	24	9	9		48398000	56170000	82693000	31301	Serine/arginine-rich splicing factor 10 OS=Homo sapiens OX=9606 GN=SRSF10 PE=1 SV=1
P82930	44	8	8		7730000	27783000	10973000	25650	28S ribosomal protein S34 mitochondrial OS=Homo sapiens OX=9606 GN=MRPS34 PE=1 SV=2
O00299	46	13	13	Acetylation (Protein N-term)	402650000	596420000	847480000	26923	Chloride intracellular channel protein 1 OS=Homo sapiens OX=9606 GN=CLIC1 PE=1 SV=4
P10321	30	11	3		12105000	10118000	19108000	40649	HLA class I histocompatibility antigen C alpha chain OS=Homo sapiens OX=9606 GN=HLA-C PE=1 SV=3
P51809	32	7	7		22658000	45832000	50372000	24935	Vesicle-associated membrane protein 7 OS=Homo sapiens OX=9606 GN=VAMP7 PE=1 SV=3
Q9NX20	18	4	4		1378200	2092700	1862100	28449	39S ribosomal protein L16 mitochondrial OS=Homo sapiens OX=9606 GN=MRPL16 PE=1 SV=1
O95071	4	8	8		4548200	8689100	10095000	309352	E3 ubiquitin-protein ligase UBR5 OS=Homo sapiens OX=9606 GN=UBR5 PE=1 SV=2
P14324	38	17	17		238290000	513480000	489170000	48276	Farnesyl pyrophosphate synthase OS=Homo sapiens OX=9606 GN=FDPS PE=1 SV=4
P12074	32	2	2		0	4692400	5143000	12155	Cytochrome c oxidase subunit 6A1 mitochondrial OS=Homo sapiens OX=9606 GN=COX6A1 PE=1 SV=4
Q96FW1	29	6	6		69965000	83388000	85222000	31284	Ubiquitin thioesterase OTUB1 OS=Homo sapiens OX=9606 GN=OTUB1 PE=1 SV=2
P50552	29	11	11		36393000	114950000	93756000	39830	Vasodilator-stimulated phosphoprotein OS=Homo sapiens OX=9606 GN=VASP PE=1 SV=3
P62841	60	17	17	Oxidation (M)	243110000	343770000	293830000	17040	40S ribosomal protein S15 OS=Homo sapiens OX=9606 GN=RPS15 PE=1 SV=2
P43307	17	3	3		4666600	3363700	3138500	32235	Translocon-associated protein subunit alpha OS=Homo sapiens OX=9606 GN=SSR1 PE=1 SV=3
P42766	31	8	7		224190000	284290000	258930000	14551	60S ribosomal protein L35 OS=Homo sapiens OX=9606 GN=RPL35 PE=1 SV=2
P83731	27	8	8	Oxidation (M)	125700000	169540000	177530000	17779	60S ribosomal protein L24 OS=Homo sapiens OX=9606 GN=RPL24 PE=1 SV=1
P62308	26	3	3		10220000	10798000	13107000	8496	Small nuclear ribonucleoprotein G OS=Homo sapiens OX=9606 GN=SNRPG PE=1 SV=1
A8MWD9	26	3	3		10220000	10798000	13107000	8544	Putative small nuclear ribonucleoprotein G-like protein 15 OS=Homo sapiens OX=9606 GN=SNRPGP15 PE=5 SV=2
Q9BZF1	8	4	4		10405000	1704900	1623800	101196	Oxysterol-binding protein-related protein 8 OS=Homo sapiens OX=9606 GN=OSBPL8 PE=1 SV=3
Q13636	37	6	6		18958000	21748000	12107000	21569	Ras-related protein Rab-31 OS=Homo sapiens OX=9606 GN=RAB31 PE=1 SV=1
Q9Y6I3	6	2	2		1305100	3370700	3980000	60293	Epsin-1 OS=Homo sapiens OX=9606 GN=EPN1 PE=1 SV=2
O76003	43	13	13		67521000	93019000	84494000	37432	Glutaredoxin-3 OS=Homo sapiens OX=9606 GN=GLRX3 PE=1 SV=2
Q9NZM5	30	6	6		2114700	4701900	9415000	54389	Ribosome biogenesis protein NOP53 OS=Homo sapiens OX=9606 GN=NOP53 PE=1 SV=2
P63167	27	4	4		70197000	111660000	82471000	10366	Dynein light chain 1 cytoplasmic OS=Homo sapiens OX=9606 GN=DYNLL1 PE=1 SV=1
O76094	41	20	20	Acetylation (Protein N-term)	86831000	230900000	207090000	74606	Signal recognition particle subunit SRP72 OS=Homo sapiens OX=9606 GN=SRP72 PE=1 SV=3
Q8NF37	15	8	8		25135000	87239000	29724000	59151	Lysophosphatidylcholine acyltransferase 1 OS=Homo sapiens OX=9606 GN=LPCAT1 PE=1 SV=2
O15144	32	11	11		152030000	134160000	124160000	34333	Actin-related protein 2/3 complex subunit 2 OS=Homo sapiens OX=9606 GN=ARPC2 PE=1 SV=1
Q15125	12	2	2	Acetylation (Protein N-term)	12113000	32341000	37593000	26353	3-beta-hydroxysteroid-Delta(8) Delta(7)-isomerase OS=Homo sapiens OX=9606 GN=EBP PE=1 SV=3
P28331	34	19	19		229350000	212690000	162520000	79468	NADH-ubiquinone oxidoreductase 75 kDa subunit mitochondrial OS=Homo sapiens OX=9606 GN=NDUFS1 PE=1 SV=3
Q9UJX2	10	4	4		3842400	5215400	7856200	68834	Cell division cycle protein 23 homolog OS=Homo sapiens OX=9606 GN=CDC23 PE=1 SV=3
Q14764	19	10	10		15288000	13422000	18624000	99327	Major vault protein OS=Homo sapiens OX=9606 GN=MVP PE=1 SV=4
Q7Z6E9	3	3	3		1364700	1188000	1655700	201563	E3 ubiquitin-protein ligase RBBP6 OS=Homo sapiens OX=9606 GN=RBBP6 PE=1 SV=1
Q9UPQ0	18	14	14		27949000	42056000	318900000	121867	LIM and calponin homology domains-containing protein 1 OS=Homo sapiens OX=9606 GN=LIMCH1 PE=1 SV=4
P62906	35	16	16		791910000	459320000	428740000	24831	60S ribosomal protein L10a OS=Homo sapiens OX=9606 GN=RPL10A PE=1 SV=2
P08133	66	44	44		223520000	294240000	268640000	75873	Annexin A6 OS=Homo sapiens OX=9606 GN=ANXA6 PE=1 SV=3
Q9BQ39	21	11	7		6435600	6371700	6185100	82565	ATP-dependent RNA helicase DDX50 OS=Homo sapiens OX=9606 GN=DDX50 PE=1 SV=1
Q9NVI1	9	8	8		10005000	52587000	40704000	149323	Fanconi anemia group I protein OS=Homo sapiens OX=9606 GN=FANCI PE=1 SV=4
Q92733	24	6	6		13720000	11301000	23262000	52418	Proline-rich protein PRCC OS=Homo sapiens OX=9606 GN=PRCC PE=1 SV=1
O96000	25	4	4		21366000	10908000	9610300	20777	NADH dehydrogenase [ubiquinone] 1 beta subcomplex subunit 10 OS=Homo sapiens OX=9606 GN=NDUFB10 PE=1 SV=3
Q9BZK7	31	12	7	Acetylation (Protein N-term)	26790000	74432000	72299000	55595	F-box-like/WD repeat-containing protein TBL1XR1 OS=Homo sapiens OX=9606 GN=TBL1XR1 PE=1 SV=1
P00374	29	5	5		93165000	90230000	84917000	21453	Dihydrofolate reductase OS=Homo sapiens OX=9606 GN=DHFR PE=1 SV=2
P52815	40	9	9	Oxidation (M)	76356000	91340000	76239000	21348	39S ribosomal protein L12 mitochondrial OS=Homo sapiens OX=9606 GN=MRPL12 PE=1 SV=2
Q8TBX8	11	3	3		465940	1960500	1521600	47300	Phosphatidylinositol 5-phosphate 4-kinase type-2 gamma OS=Homo sapiens OX=9606 GN=PIP4K2C PE=1 SV=3
Q96A35	27	4	4		1049500	1734300	1670200	24915	39S ribosomal protein L24 mitochondrial OS=Homo sapiens OX=9606 GN=MRPL24 PE=1 SV=1
O00425	44	22	17		150840000	374140000	248450000	63705	Insulin-like growth factor 2 mRNA-binding protein 3 OS=Homo sapiens OX=9606 GN=IGF2BP3 PE=1 SV=2
O75947	67	11	11		76404000	95558000	86492000	18491	ATP synthase subunit d mitochondrial OS=Homo sapiens OX=9606 GN=ATP5PD PE=1 SV=3
P19404	32	7	7		14226000	19477000	38139000	27392	NADH dehydrogenase [ubiquinone] flavoprotein 2 mitochondrial OS=Homo sapiens OX=9606 GN=NDUFV2 PE=1 SV=2
Q8WUK0	18	3	3	Acetylation (Protein N-term)	761700	95747000	96241000	22844	Phosphatidylglycerophosphatase and protein-tyrosine phosphatase 1 OS=Homo sapiens OX=9606 GN=PTPMT1 PE=1 SV=1
Q16531	27	28	28		152980000	76408000	107590000	126968	DNA damage-binding protein 1 OS=Homo sapiens OX=9606 GN=DDB1 PE=1 SV=1
Q6YN16	34	12	12		23733000	12695000	10636000	45395	Hydroxysteroid dehydrogenase-like protein 2 OS=Homo sapiens OX=9606 GN=HSDL2 PE=1 SV=1
Q8WWM7	35	29	29	Acetylation (Protein N-term)	103090000	242260000	182750000	113374	Ataxin-2-like protein OS=Homo sapiens OX=9606 GN=ATXN2L PE=1 SV=2
P78527	38	158	156	Carbamidomethylation; Oxidation (M)	1669300000	1546000000	1441300000	469093	DNA-dependent protein kinase catalytic subunit OS=Homo sapiens OX=9606 GN=PRKDC PE=1 SV=3
P08727	81	44	28		518300000	258170000	182700000	44106	Keratin type I cytoskeletal 19 OS=Homo sapiens OX=9606 GN=KRT19 PE=1 SV=4
Q15417	11	3	2		14171000	8438000	8602300	36414	Calponin-3 OS=Homo sapiens OX=9606 GN=CNN3 PE=1 SV=1
Q14240	41	26	4	Oxidation (M)	4453100	17782000	15351000	46402	Eukaryotic initiation factor 4A-II OS=Homo sapiens OX=9606 GN=EIF4A2 PE=1 SV=2
Q6NXE6	9	3	3		10303000	3767600	5266600	54142	Armadillo repeat-containing protein 6 OS=Homo sapiens OX=9606 GN=ARMC6 PE=1 SV=2
P36952	41	12	12		275960000	79483000	115460000	42100	Serpin B5 OS=Homo sapiens OX=9606 GN=SERPINB5 PE=1 SV=2
P09110	23	6	6		2655000	715750	1084400	44292	3-ketoacyl-CoA thiolase peroxisomal OS=Homo sapiens OX=9606 GN=ACAA1 PE=1 SV=2
P17987	56	35	34	Oxidation (M); Acetylation (Protein N-term)	641870000	1116900000	995850000	60344	T-complex protein 1 subunit alpha OS=Homo sapiens OX=9606 GN=TCP1 PE=1 SV=1
Q15102	27	5	5	Acetylation (Protein N-term)	24628000	39859000	25786000	25734	Platelet-activating factor acetylhydrolase IB subunit alpha1 OS=Homo sapiens OX=9606 GN=PAFAH1B3 PE=1 SV=1
P51970	43	6	6		17639000	6398900	8828600	20105	NADH dehydrogenase [ubiquinone] 1 alpha subcomplex subunit 8 OS=Homo sapiens OX=9606 GN=NDUFA8 PE=1 SV=3
Q96QD8	9	4	4		6653000	12247000	8848900	56026	Sodium-coupled neutral amino acid transporter 2 OS=Homo sapiens OX=9606 GN=SLC38A2 PE=1 SV=2
Q13501	35	10	10		74502000	115650000	116320000	47687	Sequestosome-1 OS=Homo sapiens OX=9606 GN=SQSTM1 PE=1 SV=1
Q96IU4	40	6	6		24465000	67122000	80278000	22346	Protein ABHD14B OS=Homo sapiens OX=9606 GN=ABHD14B PE=1 SV=1
Q13310	55	39	24	Carbamidomethylation; Oxidation (M); Acetylation (Protein N-term)	141130000	192750000	160660000	70783	Polyadenylate-binding protein 4 OS=Homo sapiens OX=9606 GN=PABPC4 PE=1 SV=1
Q96GM5	23	7	6		3638900	8354700	6073800	58233	SWI/SNF-related matrix-associated actin-dependent regulator of chromatin subfamily D member 1 OS=Homo sapiens OX=9606 GN=SMARCD1 PE=1 SV=2
Q9UBT2	23	10	10		80149000	49480000	79481000	71224	SUMO-activating enzyme subunit 2 OS=Homo sapiens OX=9606 GN=UBA2 PE=1 SV=2
Q96C36	32	10	9	Acetylation (Protein N-term)	7952600	18102000	14271000	33637	Pyrroline-5-carboxylate reductase 2 OS=Homo sapiens OX=9606 GN=PYCR2 PE=1 SV=1
O75312	17	6	6		3118100	11657000	13496000	50925	Zinc finger protein ZPR1 OS=Homo sapiens OX=9606 GN=ZPR1 PE=1 SV=1
Q9NUQ6	8	3	3		7034700	12151000	8559500	61729	SPATS2-like protein OS=Homo sapiens OX=9606 GN=SPATS2L PE=1 SV=2
Q96H79	14	2	2		5494500	9941500	7683200	32962	Zinc finger CCCH-type antiviral protein 1-like OS=Homo sapiens OX=9606 GN=ZC3HAV1L PE=1 SV=2
P49589	24	13	13	Oxidation (M)	52895000	35829000	42531000	85473	Cysteine--tRNA ligase cytoplasmic OS=Homo sapiens OX=9606 GN=CARS1 PE=1 SV=3
Q07866	25	12	9		17168000	37827000	33737000	65310	Kinesin light chain 1 OS=Homo sapiens OX=9606 GN=KLC1 PE=1 SV=2
Q8WXA9	15	5	5		2353100	7014300	7901100	59380	Splicing regulatory glutamine/lysine-rich protein 1 OS=Homo sapiens OX=9606 GN=SREK1 PE=1 SV=1
Q8IY67	23	8	8		17490000	25662000	18200000	63877	Ribonucleoprotein PTB-binding 1 OS=Homo sapiens OX=9606 GN=RAVER1 PE=1 SV=1
O43674	19	2	2		419340	1595100	1163800	21750	NADH dehydrogenase [ubiquinone] 1 beta subcomplex subunit 5 mitochondrial OS=Homo sapiens OX=9606 GN=NDUFB5 PE=1 SV=1
Q9ULT8	2	3	3		3983100	5067400	6045300	289383	E3 ubiquitin-protein ligase HECTD1 OS=Homo sapiens OX=9606 GN=HECTD1 PE=1 SV=3
Q8NFJ5	14	2	2		0	0	801980	40251	Retinoic acid-induced protein 3 OS=Homo sapiens OX=9606 GN=GPRC5A PE=1 SV=2
Q15042	4	3	3		1907200	1359700	700100	110524	Rab3 GTPase-activating protein catalytic subunit OS=Homo sapiens OX=9606 GN=RAB3GAP1 PE=1 SV=3
Q96RN5	4	3	3	Acetylation (Protein N-term)	919890	3711800	2371300	86753	Mediator of RNA polymerase II transcription subunit 15 OS=Homo sapiens OX=9606 GN=MED15 PE=1 SV=2
O43169	65	9	9	Acetylation (Protein N-term)	31754000	41312000	43367000	16695	Cytochrome b5 type B OS=Homo sapiens OX=9606 GN=CYB5B PE=1 SV=3
P05161	30	4	4		141640000	40405000	44641000	17888	Ubiquitin-like protein ISG15 OS=Homo sapiens OX=9606 GN=ISG15 PE=1 SV=5
Q8WVY7	16	5	5		19311000	21501000	21373000	36805	Ubiquitin-like domain-containing CTD phosphatase 1 OS=Homo sapiens OX=9606 GN=UBLCP1 PE=1 SV=2
Q92466	12	3	3		2782500	13414000	26759000	47864	DNA damage-binding protein 2 OS=Homo sapiens OX=9606 GN=DDB2 PE=1 SV=1
Q4V328	5	3	3		890180	1947300	849980	96005	GRIP1-associated protein 1 OS=Homo sapiens OX=9606 GN=GRIPAP1 PE=1 SV=2
Q16643	36	15	15	Acetylation (Protein N-term)	88201000	164340000	125790000	71429	Drebrin OS=Homo sapiens OX=9606 GN=DBN1 PE=1 SV=4
O14773	13	4	4		2168200	17817000	24007000	61248	Tripeptidyl-peptidase 1 OS=Homo sapiens OX=9606 GN=TPP1 PE=1 SV=2
Q9UPN3	2	12	10		5885200	11758000	15561000	838323	Microtubule-actin cross-linking factor 1 isoforms 1/2/3/5 OS=Homo sapiens OX=9606 GN=MACF1 PE=1 SV=4
P52943	25	6	6		60623000	42241000	55463000	22493	Cysteine-rich protein 2 OS=Homo sapiens OX=9606 GN=CRIP2 PE=1 SV=1
Q9BRX8	28	7	7		22222000	27136000	22206000	25764	Peroxiredoxin-like 2A OS=Homo sapiens OX=9606 GN=PRXL2A PE=1 SV=3
Q9Y678	30	20	18		82314000	172040000	151820000	97718	Coatomer subunit gamma-1 OS=Homo sapiens OX=9606 GN=COPG1 PE=1 SV=1
Q13085	20	33	32	Acetylation (Protein N-term)	77765000	110800000	115110000	265551	Acetyl-CoA carboxylase 1 OS=Homo sapiens OX=9606 GN=ACACA PE=1 SV=2
Q14195	18	7	5		21017000	16621000	22741000	61963	Dihydropyrimidinase-related protein 3 OS=Homo sapiens OX=9606 GN=DPYSL3 PE=1 SV=1
Q14C86	15	14	14		40905000	74304000	51881000	164979	GTPase-activating protein and VPS9 domain-containing protein 1 OS=Homo sapiens OX=9606 GN=GAPVD1 PE=1 SV=2
O95168	18	2	2		1701300	2194800	1386900	15209	NADH dehydrogenase [ubiquinone] 1 beta subcomplex subunit 4 OS=Homo sapiens OX=9606 GN=NDUFB4 PE=1 SV=3
Q9P2J5	39	35	34	Oxidation (M)	207890000	260770000	262850000	134466	Leucine--tRNA ligase cytoplasmic OS=Homo sapiens OX=9606 GN=LARS1 PE=1 SV=2
P18084	7	3	2		122710	8855900	36600000	88054	Integrin beta-5 OS=Homo sapiens OX=9606 GN=ITGB5 PE=1 SV=1
P26232	8	6	1		7663200	1295400	5539000	105313	Catenin alpha-2 OS=Homo sapiens OX=9606 GN=CTNNA2 PE=1 SV=5
P23743	5	2	2		1987600	1742700	2418300	82630	Diacylglycerol kinase alpha OS=Homo sapiens OX=9606 GN=DGKA PE=1 SV=3
Q9NR30	49	49	45		601200000	1254200000	1155200000	87344	Nucleolar RNA helicase 2 OS=Homo sapiens OX=9606 GN=DDX21 PE=1 SV=5
Q16763	29	4	4		3688300	9692000	8510400	23845	Ubiquitin-conjugating enzyme E2 S OS=Homo sapiens OX=9606 GN=UBE2S PE=1 SV=2
Q13162	41	14	11		26491000	45779000	30127000	30540	Peroxiredoxin-4 OS=Homo sapiens OX=9606 GN=PRDX4 PE=1 SV=1
Q9Y221	54	6	6		10607000	12213000	12950000	20463	60S ribosome subunit biogenesis protein NIP7 homolog OS=Homo sapiens OX=9606 GN=NIP7 PE=1 SV=1
P05141	68	35	11	Oxidation (M); Acetylation (Protein N-term)	124270000	109470000	95405000	32852	ADP/ATP translocase 2 OS=Homo sapiens OX=9606 GN=SLC25A5 PE=1 SV=7
P13995	29	6	6		3461400	7891000	7058700	37895	Bifunctional methylenetetrahydrofolate dehydrogenase/cyclohydrolase mitochondrial OS=Homo sapiens OX=9606 GN=MTHFD2 PE=1 SV=2
P63151	37	13	13		51493000	130020000	110780000	51692	Serine/threonine-protein phosphatase 2A 55 kDa regulatory subunit B alpha isoform OS=Homo sapiens OX=9606 GN=PPP2R2A PE=1 SV=1
Q68CP9	3	2	2		872770	62114	424010	197390	AT-rich interactive domain-containing protein 2 OS=Homo sapiens OX=9606 GN=ARID2 PE=1 SV=2
Q8IVL5	5	2	2		239410	2919000	997320	80985	Prolyl 3-hydroxylase 2 OS=Homo sapiens OX=9606 GN=P3H2 PE=1 SV=1
Q7LBC6	6	6	6		4600100	3233500	4694300	191580	Lysine-specific demethylase 3B OS=Homo sapiens OX=9606 GN=KDM3B PE=1 SV=2
Q9NRZ9	17	13	12		34494000	26167000	31863000	97074	Lymphoid-specific helicase OS=Homo sapiens OX=9606 GN=HELLS PE=1 SV=1
P15880	51	25	25	Carbamidomethylation	638480000	1221300000	1086400000	31324	40S ribosomal protein S2 OS=Homo sapiens OX=9606 GN=RPS2 PE=1 SV=2
P30838	33	12	10		192320000	66267000	95909000	50395	Aldehyde dehydrogenase dimeric NADP-preferring OS=Homo sapiens OX=9606 GN=ALDH3A1 PE=1 SV=3
Q6IBS0	25	6	6	Acetylation (Protein N-term)	71602000	65819000	76242000	39548	Twinfilin-2 OS=Homo sapiens OX=9606 GN=TWF2 PE=1 SV=2
P53985	11	7	7		50400000	43208000	33200000	53944	Monocarboxylate transporter 1 OS=Homo sapiens OX=9606 GN=SLC16A1 PE=1 SV=3
Q13617	8	8	8		15180000	11998000	18886000	86983	Cullin-2 OS=Homo sapiens OX=9606 GN=CUL2 PE=1 SV=2
Q9NR45	24	7	7		49046000	113770000	124010000	40308	Sialic acid synthase OS=Homo sapiens OX=9606 GN=NANS PE=1 SV=2
Q14498	42	20	20	Acetylation (Protein N-term)	110330000	364290000	183670000	59380	RNA-binding protein 39 OS=Homo sapiens OX=9606 GN=RBM39 PE=1 SV=2
P00441	66	7	7	Carbamidomethylation	240850000	74573000	102050000	15936	Superoxide dismutase [Cu-Zn] OS=Homo sapiens OX=9606 GN=SOD1 PE=1 SV=2
P30084	49	13	13		104410000	121140000	137200000	31387	Enoyl-CoA hydratase mitochondrial OS=Homo sapiens OX=9606 GN=ECHS1 PE=1 SV=4
P17174	45	14	14		142960000	99716000	73428000	46248	Aspartate aminotransferase cytoplasmic OS=Homo sapiens OX=9606 GN=GOT1 PE=1 SV=3
Q9Y6Y8	6	4	4		4823200	23464000	11888000	111076	SEC23-interacting protein OS=Homo sapiens OX=9606 GN=SEC23IP PE=1 SV=1
P35520	12	5	5		20696000	57652000	38786000	60587	Cystathionine beta-synthase OS=Homo sapiens OX=9606 GN=CBS PE=1 SV=2
P0DN79	12	5	5		20696000	57652000	38786000	60587	Cystathionine beta-synthase-like protein OS=Homo sapiens OX=9606 GN=CBSL PE=1 SV=1
P61960	59	3	3		22679000	21519000	31793000	9118	Ubiquitin-fold modifier 1 OS=Homo sapiens OX=9606 GN=UFM1 PE=1 SV=1
Q9UBV8	19	3	3		460240	419080	519790	30381	Peflin OS=Homo sapiens OX=9606 GN=PEF1 PE=1 SV=1
P46109	26	6	5	Oxidation (M)	96020000	33172000	41137000	33777	Crk-like protein OS=Homo sapiens OX=9606 GN=CRKL PE=1 SV=1
Q8WUY1	26	3	3		2144500	18036000	22978000	23865	Protein THEM6 OS=Homo sapiens OX=9606 GN=THEM6 PE=1 SV=2
Q12899	15	5	5		1268200	1432000	7192700	62166	Tripartite motif-containing protein 26 OS=Homo sapiens OX=9606 GN=TRIM26 PE=1 SV=1
Q96AX1	11	3	3		0	0	86852	67611	Vacuolar protein sorting-associated protein 33A OS=Homo sapiens OX=9606 GN=VPS33A PE=1 SV=1
P21399	27	16	16	Oxidation (M); Acetylation (Protein N-term)	91184000	51249000	75351000	98399	Cytoplasmic aconitate hydratase OS=Homo sapiens OX=9606 GN=ACO1 PE=1 SV=3
P08754	36	11	7		16004000	38941000	33197000	40532	Guanine nucleotide-binding protein G(i) subunit alpha-3 OS=Homo sapiens OX=9606 GN=GNAI3 PE=1 SV=3
Q9NRY2	12	1	1		1608200	15477000	10678000	11425	SOSS complex subunit C OS=Homo sapiens OX=9606 GN=INIP PE=1 SV=1
Q9H9P8	14	4	4		134900	6810800	6107800	50316	L-2-hydroxyglutarate dehydrogenase mitochondrial OS=Homo sapiens OX=9606 GN=L2HGDH PE=1 SV=3
Q99653	29	4	4		2402400	5347100	11653000	22456	Calcineurin B homologous protein 1 OS=Homo sapiens OX=9606 GN=CHP1 PE=1 SV=3
Q86YQ8	7	3	2		0	2661300	7331800	63108	Copine-8 OS=Homo sapiens OX=9606 GN=CPNE8 PE=1 SV=2
P32322	49	12	11	Acetylation (Protein N-term)	294500000	47363000	63598000	33361	Pyrroline-5-carboxylate reductase 1 mitochondrial OS=Homo sapiens OX=9606 GN=PYCR1 PE=1 SV=2
Q9C0D9	14	4	4	Acetylation (Protein N-term)	3823100	1034200	1755600	45229	Ethanolaminephosphotransferase 1 OS=Homo sapiens OX=9606 GN=SELENOI PE=1 SV=3
O75208	35	5	5		722260	702680	0	35509	Ubiquinone biosynthesis protein COQ9 mitochondrial OS=Homo sapiens OX=9606 GN=COQ9 PE=1 SV=1
P09651	56	49	17	Oxidation (M)	396760000	1160300000	804510000	38747	Heterogeneous nuclear ribonucleoprotein A1 OS=Homo sapiens OX=9606 GN=HNRNPA1 PE=1 SV=5
P48506	13	6	6		13315000	32812000	20316000	72766	Glutamate--cysteine ligase catalytic subunit OS=Homo sapiens OX=9606 GN=GCLC PE=1 SV=2
Q9NQT5	39	9	9	Acetylation (Protein N-term)	21038000	29936000	29100000	29572	Exosome complex component RRP40 OS=Homo sapiens OX=9606 GN=EXOSC3 PE=1 SV=3
O75376	3	3	3		57146	1123900	248450	270207	Nuclear receptor corepressor 1 OS=Homo sapiens OX=9606 GN=NCOR1 PE=1 SV=2
P37802	62	15	15	Oxidation (M)	1116800000	1174300000	1206200000	22391	Transgelin-2 OS=Homo sapiens OX=9606 GN=TAGLN2 PE=1 SV=3
P21964	20	10	10		23942000	9943000	9004000	30037	Catechol O-methyltransferase OS=Homo sapiens OX=9606 GN=COMT PE=1 SV=2
O43592	12	9	9	Oxidation (M); Acetylation (Protein N-term)	21986000	18233000	42995000	109964	Exportin-T OS=Homo sapiens OX=9606 GN=XPOT PE=1 SV=2
P15170	46	18	9	Oxidation (M)	102060000	76545000	74510000	55756	Eukaryotic peptide chain release factor GTP-binding subunit ERF3A OS=Homo sapiens OX=9606 GN=GSPT1 PE=1 SV=1
P27816	47	51	51	Oxidation (M); Acetylation (Protein N-term)	770370000	1191100000	1090700000	121005	Microtubule-associated protein 4 OS=Homo sapiens OX=9606 GN=MAP4 PE=1 SV=3
Q15758	17	8	8		64872000	41189000	35210000	56598	Neutral amino acid transporter B(0) OS=Homo sapiens OX=9606 GN=SLC1A5 PE=1 SV=2
Q7Z7H5	21	3	3		1124300	5083000	4390400	25943	Transmembrane emp24 domain-containing protein 4 OS=Homo sapiens OX=9606 GN=TMED4 PE=1 SV=1
P55327	62	11	11		80775000	88606000	110780000	24327	Tumor protein D52 OS=Homo sapiens OX=9606 GN=TPD52 PE=1 SV=2
Q96T37	20	12	12		19530000	60617000	43658000	107188	RNA-binding protein 15 OS=Homo sapiens OX=9606 GN=RBM15 PE=1 SV=2
Q9UBB4	25	11	11	Oxidation (M)	134900000	149320000	152340000	53489	Ataxin-10 OS=Homo sapiens OX=9606 GN=ATXN10 PE=1 SV=1
Q9H3P2	9	3	3		35021000	11583000	11324000	57277	Negative elongation factor A OS=Homo sapiens OX=9606 GN=NELFA PE=1 SV=3
Q9BUR4	5	2	2		299660	2465100	1940300	59309	Telomerase Cajal body protein 1 OS=Homo sapiens OX=9606 GN=WRAP53 PE=1 SV=1
Q9UHB9	34	17	17		42995000	52474000	46976000	70730	Signal recognition particle subunit SRP68 OS=Homo sapiens OX=9606 GN=SRP68 PE=1 SV=2
Q7Z7F7	19	2	2		1225500	138310	988840	15128	39S ribosomal protein L55 mitochondrial OS=Homo sapiens OX=9606 GN=MRPL55 PE=1 SV=1
Q4KMP7	8	3	3	Acetylation (Protein N-term)	4549700	5527300	5953400	87199	TBC1 domain family member 10B OS=Homo sapiens OX=9606 GN=TBC1D10B PE=1 SV=3
P09669	51	6	6		44397000	45035000	39991000	8781	Cytochrome c oxidase subunit 6C OS=Homo sapiens OX=9606 GN=COX6C PE=1 SV=2
P06730	35	6	6	Acetylation (Protein N-term)	74806000	62356000	48251000	25097	Eukaryotic translation initiation factor 4E OS=Homo sapiens OX=9606 GN=EIF4E PE=1 SV=2
P07910	75	41	40	Oxidation (M); Acetylation (Protein N-term)	1202600000	2152300000	898150000	33670	Heterogeneous nuclear ribonucleoproteins C1/C2 OS=Homo sapiens OX=9606 GN=HNRNPC PE=1 SV=4
P07237	78	46	46	Oxidation (M)	667270000	1293000000	1233200000	57116	Protein disulfide-isomerase OS=Homo sapiens OX=9606 GN=P4HB PE=1 SV=3
P33316	45	10	10	Oxidation (M)	322960000	134370000	171720000	26563	Deoxyuridine 5'-triphosphate nucleotidohydrolase mitochondrial OS=Homo sapiens OX=9606 GN=DUT PE=1 SV=4
O43768	67	9	8	Acetylation (Protein N-term)	73610000	129740000	105430000	13389	Alpha-endosulfine OS=Homo sapiens OX=9606 GN=ENSA PE=1 SV=1
P52209	42	22	22		468510000	715440000	665520000	53140	6-phosphogluconate dehydrogenase decarboxylating OS=Homo sapiens OX=9606 GN=PGD PE=1 SV=3
Q8IVS2	26	6	6		2854800	1061600	808360	42962	Malonyl-CoA-acyl carrier protein transacylase mitochondrial OS=Homo sapiens OX=9606 GN=MCAT PE=1 SV=2
Q06210	41	23	20		76997000	194570000	194760000	78806	Glutamine--fructose-6-phosphate aminotransferase [isomerizing] 1 OS=Homo sapiens OX=9606 GN=GFPT1 PE=1 SV=3
Q92979	51	10	10	Acetylation (Protein N-term)	81072000	164400000	178510000	26720	Ribosomal RNA small subunit methyltransferase NEP1 OS=Homo sapiens OX=9606 GN=EMG1 PE=1 SV=4
O14880	28	6	6		13247000	3385900	15840000	16516	Microsomal glutathione S-transferase 3 OS=Homo sapiens OX=9606 GN=MGST3 PE=1 SV=1
Q53H12	10	2	2		1146200	4462700	23893000	47137	Acylglycerol kinase mitochondrial OS=Homo sapiens OX=9606 GN=AGK PE=1 SV=2
Q8NBT2	29	3	3		6585200	4716800	4834300	22478	Kinetochore protein Spc24 OS=Homo sapiens OX=9606 GN=SPC24 PE=1 SV=2
Q04323	39	8	8		59027000	78705000	74584000	33325	UBX domain-containing protein 1 OS=Homo sapiens OX=9606 GN=UBXN1 PE=1 SV=2
Q14353	17	3	3		3422100	8555300	11547000	26318	Guanidinoacetate N-methyltransferase OS=Homo sapiens OX=9606 GN=GAMT PE=1 SV=1
O14908	34	7	6		15599000	37367000	42771000	36049	PDZ domain-containing protein GIPC1 OS=Homo sapiens OX=9606 GN=GIPC1 PE=1 SV=2
P21266	32	9	8		91560000	125730000	175510000	26560	Glutathione S-transferase Mu 3 OS=Homo sapiens OX=9606 GN=GSTM3 PE=1 SV=3
Q9HD45	10	3	3		1599200	0	0	67888	Transmembrane 9 superfamily member 3 OS=Homo sapiens OX=9606 GN=TM9SF3 PE=1 SV=2
Q9NQW7	25	13	13		28811000	54540000	72197000	69918	Xaa-Pro aminopeptidase 1 OS=Homo sapiens OX=9606 GN=XPNPEP1 PE=1 SV=3
Q9BWD1	40	15	15	Oxidation (M); Acetylation (Protein N-term)	127930000	115010000	121570000	41351	Acetyl-CoA acetyltransferase cytosolic OS=Homo sapiens OX=9606 GN=ACAT2 PE=1 SV=2
Q9H9B1	5	5	5		5445100	11422000	18195000	141466	Histone-lysine N-methyltransferase EHMT1 OS=Homo sapiens OX=9606 GN=EHMT1 PE=1 SV=4
P31150	42	16	8		25818000	31383000	24396000	50583	Rab GDP dissociation inhibitor alpha OS=Homo sapiens OX=9606 GN=GDI1 PE=1 SV=2
Q13084	54	11	11		9472300	14056000	37110000	30157	39S ribosomal protein L28 mitochondrial OS=Homo sapiens OX=9606 GN=MRPL28 PE=1 SV=4
P61758	44	9	8		41947000	70912000	55769000	22626	Prefoldin subunit 3 OS=Homo sapiens OX=9606 GN=VBP1 PE=1 SV=4
P47755	57	13	8	Acetylation (Protein N-term)	69060000	33398000	47902000	32949	F-actin-capping protein subunit alpha-2 OS=Homo sapiens OX=9606 GN=CAPZA2 PE=1 SV=3
Q9UNQ2	35	8	8		14490000	32578000	38167000	35236	Probable dimethyladenosine transferase OS=Homo sapiens OX=9606 GN=DIMT1 PE=1 SV=1
Q969V3	30	12	12		498500000	125740000	146460000	62974	Nicalin OS=Homo sapiens OX=9606 GN=NCLN PE=1 SV=2
O43290	34	23	23		96129000	84398000	73785000	90255	U4/U6.U5 tri-snRNP-associated protein 1 OS=Homo sapiens OX=9606 GN=SART1 PE=1 SV=1
P06132	22	7	7	Acetylation (Protein N-term)	43850000	10914000	14643000	40787	Uroporphyrinogen decarboxylase OS=Homo sapiens OX=9606 GN=UROD PE=1 SV=2
O75717	9	7	7		30450000	8847600	12670000	125967	WD repeat and HMG-box DNA-binding protein 1 OS=Homo sapiens OX=9606 GN=WDHD1 PE=1 SV=1
O00165	33	4	4		693020	1768000	459460	31621	HCLS1-associated protein X-1 OS=Homo sapiens OX=9606 GN=HAX1 PE=1 SV=2
Q9BQ52	29	15	15		29159000	26164000	21951000	92219	Zinc phosphodiesterase ELAC protein 2 OS=Homo sapiens OX=9606 GN=ELAC2 PE=1 SV=2
Q9NX46	16	4	4		9267000	13522000	18251000	38947	ADP-ribose glycohydrolase ARH3 OS=Homo sapiens OX=9606 GN=ADPRS PE=1 SV=1
Q9BPW8	27	4	4		2079800	6163800	6712700	33310	Protein NipSnap homolog 1 OS=Homo sapiens OX=9606 GN=NIPSNAP1 PE=1 SV=1
P0DPB6	19	3	3		8448700	18198000	16119000	15237	DNA-directed RNA polymerases I and III subunit RPAC2 OS=Homo sapiens OX=9606 GN=POLR1D PE=1 SV=1
Q96HY6	41	10	10		33932000	159890000	152920000	35611	DDRGK domain-containing protein 1 OS=Homo sapiens OX=9606 GN=DDRGK1 PE=1 SV=2
Q12846	34	6	6		31505000	96358000	75783000	34180	Syntaxin-4 OS=Homo sapiens OX=9606 GN=STX4 PE=1 SV=2
P61086	30	5	5		299790000	250510000	288660000	22407	Ubiquitin-conjugating enzyme E2 K OS=Homo sapiens OX=9606 GN=UBE2K PE=1 SV=3
Q8WUQ7	6	3	3		220930	15836000	14087000	88702	Cactin OS=Homo sapiens OX=9606 GN=CACTIN PE=1 SV=3
P22059	15	7	7		24991000	96347000	136210000	89421	Oxysterol-binding protein 1 OS=Homo sapiens OX=9606 GN=OSBP PE=1 SV=1
P13693	72	11	11	Oxidation (M)	191040000	251220000	328680000	19595	Translationally-controlled tumor protein OS=Homo sapiens OX=9606 GN=TPT1 PE=1 SV=1
Q8IZ83	20	9	9		7418500	24876000	11096000	85127	Aldehyde dehydrogenase family 16 member A1 OS=Homo sapiens OX=9606 GN=ALDH16A1 PE=1 SV=2
Q5TFE4	12	3	3		2338500	3312300	268470	51845	5'-nucleotidase domain-containing protein 1 OS=Homo sapiens OX=9606 GN=NT5DC1 PE=1 SV=1
Q06323	41	11	11		149940000	197750000	189450000	28723	Proteasome activator complex subunit 1 OS=Homo sapiens OX=9606 GN=PSME1 PE=1 SV=1
Q8IXI1	20	7	6		19474000	13935000	12985000	68118	Mitochondrial Rho GTPase 2 OS=Homo sapiens OX=9606 GN=RHOT2 PE=1 SV=2
P36776	43	30	30		148290000	235860000	134150000	106489	Lon protease homolog mitochondrial OS=Homo sapiens OX=9606 GN=LONP1 PE=1 SV=2
Q9NR46	9	3	3		3684100	7446700	4336500	43974	Endophilin-B2 OS=Homo sapiens OX=9606 GN=SH3GLB2 PE=1 SV=1
P09493	48	17	6		20648000	22633000	25187000	32709	Tropomyosin alpha-1 chain OS=Homo sapiens OX=9606 GN=TPM1 PE=1 SV=2
Q9UHA3	12	2	2		4519700	25455000	29863000	19621	Probable ribosome biogenesis protein RLP24 OS=Homo sapiens OX=9606 GN=RSL24D1 PE=1 SV=1
Q92747	17	5	5		32352000	29015000	26048000	41569	Actin-related protein 2/3 complex subunit 1A OS=Homo sapiens OX=9606 GN=ARPC1A PE=1 SV=2
O43847	7	7	7		16421000	17643000	16283000	131700	Nardilysin OS=Homo sapiens OX=9606 GN=NRDC PE=1 SV=3
Q15418	14	9	5		5364100	12837000	12261000	82723	Ribosomal protein S6 kinase alpha-1 OS=Homo sapiens OX=9606 GN=RPS6KA1 PE=1 SV=2
O43813	11	4	4		65845000	83057000	68220000	45283	Glutathione S-transferase LANCL1 OS=Homo sapiens OX=9606 GN=LANCL1 PE=1 SV=1
Q92620	9	10	9		7032400	29770000	21371000	140502	Pre-mRNA-splicing factor ATP-dependent RNA helicase PRP16 OS=Homo sapiens OX=9606 GN=DHX38 PE=1 SV=2
Q76FK4	4	3	3		3346000	6338900	11942000	131616	Nucleolar protein 8 OS=Homo sapiens OX=9606 GN=NOL8 PE=1 SV=1
Q15819	63	9	4		36536000	77668000	64831000	16363	Ubiquitin-conjugating enzyme E2 variant 2 OS=Homo sapiens OX=9606 GN=UBE2V2 PE=1 SV=4
Q13751	3	2	2		192790	0	427850	129572	Laminin subunit beta-3 OS=Homo sapiens OX=9606 GN=LAMB3 PE=1 SV=1
O15143	19	5	5		98476000	187870000	137870000	40950	Actin-related protein 2/3 complex subunit 1B OS=Homo sapiens OX=9606 GN=ARPC1B PE=1 SV=3
Q8IWA0	13	10	10		29658000	63261000	44165000	94499	WD repeat-containing protein 75 OS=Homo sapiens OX=9606 GN=WDR75 PE=1 SV=1
Q16555	37	16	14		123250000	127870000	142590000	62294	Dihydropyrimidinase-related protein 2 OS=Homo sapiens OX=9606 GN=DPYSL2 PE=1 SV=1
P16152	54	11	11	Acetylation (Protein N-term)	246660000	310700000	383660000	30375	Carbonyl reductase [NADPH] 1 OS=Homo sapiens OX=9606 GN=CBR1 PE=1 SV=3
Q9C0J8	11	8	8		56149000	81591000	79058000	145891	pre-mRNA 3' end processing protein WDR33 OS=Homo sapiens OX=9606 GN=WDR33 PE=1 SV=2
O95817	32	13	13		34596000	73465000	70668000	61595	BAG family molecular chaperone regulator 3 OS=Homo sapiens OX=9606 GN=BAG3 PE=1 SV=3
Q15363	31	5	5	Oxidation (M)	19904000	20471000	33793000	22761	Transmembrane emp24 domain-containing protein 2 OS=Homo sapiens OX=9606 GN=TMED2 PE=1 SV=1
P21589	12	3	3		584980	3672800	4124300	63368	5'-nucleotidase OS=Homo sapiens OX=9606 GN=NT5E PE=1 SV=1
P26583	32	10	8		306890000	186580000	125110000	24034	High mobility group protein B2 OS=Homo sapiens OX=9606 GN=HMGB2 PE=1 SV=2
O94888	14	5	5	Acetylation (Protein N-term)	4725200	14506000	14354000	54862	UBX domain-containing protein 7 OS=Homo sapiens OX=9606 GN=UBXN7 PE=1 SV=2
Q5T1M5	6	5	5	Acetylation (Protein N-term)	21167000	17371000	6699200	133630	FK506-binding protein 15 OS=Homo sapiens OX=9606 GN=FKBP15 PE=1 SV=2
P57081	9	2	2		3361900	12199000	4627000	45490	tRNA (guanine-N(7)-)-methyltransferase non-catalytic subunit WDR4 OS=Homo sapiens OX=9606 GN=WDR4 PE=1 SV=2
O14519	50	3	3	Acetylation (Protein N-term)	589370	0	0	12365	Cyclin-dependent kinase 2-associated protein 1 OS=Homo sapiens OX=9606 GN=CDK2AP1 PE=1 SV=1
Q96QK1	28	17	17		103470000	265140000	268550000	91707	Vacuolar protein sorting-associated protein 35 OS=Homo sapiens OX=9606 GN=VPS35 PE=1 SV=2
P48047	63	12	12	Carbamidomethylation	225500000	348900000	149890000	23277	ATP synthase subunit O mitochondrial OS=Homo sapiens OX=9606 GN=ATP5PO PE=1 SV=1
P52594	11	3	3		8742200	8171000	3054800	58260	Arf-GAP domain and FG repeat-containing protein 1 OS=Homo sapiens OX=9606 GN=AGFG1 PE=1 SV=2
Q9NXG2	19	3	3	Acetylation (Protein N-term)	12521000	25981000	25068000	39315	THUMP domain-containing protein 1 OS=Homo sapiens OX=9606 GN=THUMPD1 PE=1 SV=2
P82673	29	6	6		7320800	9061300	13285000	36844	28S ribosomal protein S35 mitochondrial OS=Homo sapiens OX=9606 GN=MRPS35 PE=1 SV=1
Q96I24	58	27	23	Acetylation (Protein N-term)	199870000	280600000	279970000	61640	Far upstream element-binding protein 3 OS=Homo sapiens OX=9606 GN=FUBP3 PE=1 SV=2
Q9H2U1	28	24	23	Acetylation (Protein N-term)	249130000	38904000	72759000	114760	ATP-dependent DNA/RNA helicase DHX36 OS=Homo sapiens OX=9606 GN=DHX36 PE=1 SV=2
Q29RF7	23	22	20	Oxidation (M)	40739000	71667000	58953000	150830	Sister chromatid cohesion protein PDS5 homolog A OS=Homo sapiens OX=9606 GN=PDS5A PE=1 SV=1
Q9UBE0	37	11	11	Oxidation (M)	44019000	63134000	65180000	38450	SUMO-activating enzyme subunit 1 OS=Homo sapiens OX=9606 GN=SAE1 PE=1 SV=1
P63313	68	6	5	Oxidation (M); Acetylation (Protein N-term)	806430000	2076200000	2176700000	5026	Thymosin beta-10 OS=Homo sapiens OX=9606 GN=TMSB10 PE=1 SV=2
P04080	46	3	3		147130000	49629000	47358000	11140	Cystatin-B OS=Homo sapiens OX=9606 GN=CSTB PE=1 SV=2
Q8NHH9	15	6	6		4938700	5164600	6387900	66229	Atlastin-2 OS=Homo sapiens OX=9606 GN=ATL2 PE=1 SV=2
Q14203	22	18	18		39765000	78612000	63739000	141694	Dynactin subunit 1 OS=Homo sapiens OX=9606 GN=DCTN1 PE=1 SV=3
Q9NP77	22	3	3		6867700	19196000	19175000	22574	RNA polymerase II subunit A C-terminal domain phosphatase SSU72 OS=Homo sapiens OX=9606 GN=SSU72 PE=1 SV=1
Q92734	28	9	9	Acetylation (Protein N-term)	39285000	75290000	100110000	43448	Protein TFG OS=Homo sapiens OX=9606 GN=TFG PE=1 SV=2
Q02241	20	13	12		10899000	28525000	24689000	110059	Kinesin-like protein KIF23 OS=Homo sapiens OX=9606 GN=KIF23 PE=1 SV=3
Q9BXV9	60	3	3	Acetylation (Protein N-term)	6490200	3852500	6392700	10859	EKC/KEOPS complex subunit GON7 OS=Homo sapiens OX=9606 GN=GON7 PE=1 SV=2
O15355	43	17	17	Oxidation (M)	143040000	188190000	250060000	59272	Protein phosphatase 1G OS=Homo sapiens OX=9606 GN=PPM1G PE=1 SV=1
Q8WX92	21	7	7		17554000	260530000	259490000	65697	Negative elongation factor B OS=Homo sapiens OX=9606 GN=NELFB PE=1 SV=1
Q8IYD1	20	12	3	Oxidation (M)	4996600	6128600	7367300	68883	Eukaryotic peptide chain release factor GTP-binding subunit ERF3B OS=Homo sapiens OX=9606 GN=GSPT2 PE=1 SV=2
P19525	30	14	14		33289000	38289000	33089000	62094	Interferon-induced double-stranded RNA-activated protein kinase OS=Homo sapiens OX=9606 GN=EIF2AK2 PE=1 SV=2
Q8IXM2	17	2	2		1975700	6653000	18013000	17900	Chromatin complexes subunit BAP18 OS=Homo sapiens OX=9606 GN=BAP18 PE=1 SV=1
Q8WWI1	26	31	31		92045000	142830000	115690000	192694	LIM domain only protein 7 OS=Homo sapiens OX=9606 GN=LMO7 PE=1 SV=3
Q32MZ4	23	14	14		34746000	64622000	81496000	89253	Leucine-rich repeat flightless-interacting protein 1 OS=Homo sapiens OX=9606 GN=LRRFIP1 PE=1 SV=2
Q13123	36	15	15		51847000	82491000	74137000	65602	Protein Red OS=Homo sapiens OX=9606 GN=IK PE=1 SV=3
P99999	59	12	12		237120000	166130000	100900000	11749	Cytochrome c OS=Homo sapiens OX=9606 GN=CYCS PE=1 SV=2
P42025	38	10	3	Acetylation (Protein N-term)	25757000	17108000	25948000	42293	Beta-centractin OS=Homo sapiens OX=9606 GN=ACTR1B PE=1 SV=1
Q14247	44	25	25		283780000	457170000	441700000	61586	Src substrate cortactin OS=Homo sapiens OX=9606 GN=CTTN PE=1 SV=2
P19387	27	5	5		7667000	10764000	14194000	31441	DNA-directed RNA polymerase II subunit RPB3 OS=Homo sapiens OX=9606 GN=POLR2C PE=1 SV=2
Q12873	13	21	6		6893900	10226000	13667000	226590	Chromodomain-helicase-DNA-binding protein 3 OS=Homo sapiens OX=9606 GN=CHD3 PE=1 SV=3
P62140	39	15	6	Acetylation (Protein N-term)	48111000	135460000	103620000	37187	Serine/threonine-protein phosphatase PP1-beta catalytic subunit OS=Homo sapiens OX=9606 GN=PPP1CB PE=1 SV=3
Q6P587	21	2	2		490550	62331	229140	24843	Acylpyruvase FAHD1 mitochondrial OS=Homo sapiens OX=9606 GN=FAHD1 PE=1 SV=2
P68402	22	3	3	Acetylation (Protein N-term)	24007000	71844000	69821000	25569	Platelet-activating factor acetylhydrolase IB subunit alpha2 OS=Homo sapiens OX=9606 GN=PAFAH1B2 PE=1 SV=1
P04818	43	12	12	Carbamidomethylation	76219000	146860000	156710000	35716	Thymidylate synthase OS=Homo sapiens OX=9606 GN=TYMS PE=1 SV=3
Q63HN8	3	11	11		49969000	69708000	84734000	591415	E3 ubiquitin-protein ligase RNF213 OS=Homo sapiens OX=9606 GN=RNF213 PE=1 SV=3
Q9NZN4	24	10	8		19721000	12780000	12271000	61162	EH domain-containing protein 2 OS=Homo sapiens OX=9606 GN=EHD2 PE=1 SV=2
P62244	60	13	13	Oxidation (M)	201780000	233450000	274150000	14840	40S ribosomal protein S15a OS=Homo sapiens OX=9606 GN=RPS15A PE=1 SV=2
P40926	57	19	19	Carbamidomethylation; Oxidation (M)	474980000	302180000	343430000	35503	Malate dehydrogenase mitochondrial OS=Homo sapiens OX=9606 GN=MDH2 PE=1 SV=3
Q92598	47	33	30	Oxidation (M)	172580000	305310000	282990000	96865	Heat shock protein 105 kDa OS=Homo sapiens OX=9606 GN=HSPH1 PE=1 SV=1
Q68EM7	22	10	10		25574000	21406000	18343000	95437	Rho GTPase-activating protein 17 OS=Homo sapiens OX=9606 GN=ARHGAP17 PE=1 SV=1
P46934	3	2	2		430750	885120	948870	149114	E3 ubiquitin-protein ligase NEDD4 OS=Homo sapiens OX=9606 GN=NEDD4 PE=1 SV=4
Q96A72	78	10	10	Acetylation (Protein N-term)	107370000	159220000	228680000	17276	Protein mago nashi homolog 2 OS=Homo sapiens OX=9606 GN=MAGOHB PE=1 SV=1
Q8NFC6	2	4	4		7671600	6216400	12200000	330467	Biorientation of chromosomes in cell division protein 1-like 1 OS=Homo sapiens OX=9606 GN=BOD1L1 PE=1 SV=2
Q9H501	9	5	5		2550900	19586000	17380000	98796	ESF1 homolog OS=Homo sapiens OX=9606 GN=ESF1 PE=1 SV=1
Q9NW82	11	7	7		20566000	40236000	35520000	73201	WD repeat-containing protein 70 OS=Homo sapiens OX=9606 GN=WDR70 PE=1 SV=1
Q9UJW0	6	2	2		2166800	3434600	13728000	52337	Dynactin subunit 4 OS=Homo sapiens OX=9606 GN=DCTN4 PE=1 SV=1
O95478	32	8	8		57392000	507480000	64173000	30065	Ribosome biogenesis protein NSA2 homolog OS=Homo sapiens OX=9606 GN=NSA2 PE=1 SV=1
P49406	28	7	7		19808000	6770700	9427200	33535	39S ribosomal protein L19 mitochondrial OS=Homo sapiens OX=9606 GN=MRPL19 PE=1 SV=2
O95235	7	4	4		5317800	17060000	8272800	100278	Kinesin-like protein KIF20A OS=Homo sapiens OX=9606 GN=KIF20A PE=1 SV=1
Q96EY1	25	10	10		101730000	299700000	92617000	52489	DnaJ homolog subfamily A member 3 mitochondrial OS=Homo sapiens OX=9606 GN=DNAJA3 PE=1 SV=2
O75027	29	12	12		7211200	8136800	7827600	82641	Iron-sulfur clusters transporter ABCB7 mitochondrial OS=Homo sapiens OX=9606 GN=ABCB7 PE=1 SV=2
Q99848	49	19	19		209910000	217440000	265160000	34852	Probable rRNA-processing protein EBP2 OS=Homo sapiens OX=9606 GN=EBNA1BP2 PE=1 SV=2
P10768	32	7	7		74414000	108920000	94626000	31463	S-formylglutathione hydrolase OS=Homo sapiens OX=9606 GN=ESD PE=1 SV=2
O60716	32	20	20	Acetylation (Protein N-term)	50396000	73946000	57473000	108170	Catenin delta-1 OS=Homo sapiens OX=9606 GN=CTNND1 PE=1 SV=1
Q00653	8	4	4		2791900	11562000	15107000	96749	Nuclear factor NF-kappa-B p100 subunit OS=Homo sapiens OX=9606 GN=NFKB2 PE=1 SV=4
Q5ZPR3	8	2	2		1259400	0	159790	57236	CD276 antigen OS=Homo sapiens OX=9606 GN=CD276 PE=1 SV=1
Q9UQ13	4	2	2		273610	3281300	2319600	64888	Leucine-rich repeat protein SHOC-2 OS=Homo sapiens OX=9606 GN=SHOC2 PE=1 SV=2
P04179	60	8	8		40052000	21998000	23253000	24750	Superoxide dismutase [Mn] mitochondrial OS=Homo sapiens OX=9606 GN=SOD2 PE=1 SV=3
Q99627	43	6	6		30011000	43911000	92502000	23226	COP9 signalosome complex subunit 8 OS=Homo sapiens OX=9606 GN=COPS8 PE=1 SV=1
Q96SI9	27	18	11		40247000	176800000	129570000	73653	Spermatid perinuclear RNA-binding protein OS=Homo sapiens OX=9606 GN=STRBP PE=1 SV=1
O75223	22	4	4		167130000	347370000	256080000	21008	Gamma-glutamylcyclotransferase OS=Homo sapiens OX=9606 GN=GGCT PE=1 SV=1
Q8WUD4	15	2	2		1802500	3997600	2087600	19181	Coiled-coil domain-containing protein 12 OS=Homo sapiens OX=9606 GN=CCDC12 PE=1 SV=1
Q13505	24	8	8		8193800	5437500	10518000	51463	Metaxin-1 OS=Homo sapiens OX=9606 GN=MTX1 PE=1 SV=3
P61619	12	5	5		21831000	60453000	30551000	52265	Protein transport protein Sec61 subunit alpha isoform 1 OS=Homo sapiens OX=9606 GN=SEC61A1 PE=1 SV=2
Q8TEQ6	13	16	16		36062000	85033000	56162000	168589	Gem-associated protein 5 OS=Homo sapiens OX=9606 GN=GEMIN5 PE=1 SV=3
Q96EN8	5	3	3		108080000	2001800	538450	98120	Molybdenum cofactor sulfurase OS=Homo sapiens OX=9606 GN=MOCOS PE=1 SV=2
Q9Y5K5	51	14	14		68310000	96296000	127850000	37607	Ubiquitin carboxyl-terminal hydrolase isozyme L5 OS=Homo sapiens OX=9606 GN=UCHL5 PE=1 SV=3
Q9NVJ2	49	8	8	Acetylation (Protein N-term)	21321000	23234000	21716000	21539	ADP-ribosylation factor-like protein 8B OS=Homo sapiens OX=9606 GN=ARL8B PE=1 SV=1
Q27J81	35	30	29		55169000	138060000	157320000	135624	Inverted formin-2 OS=Homo sapiens OX=9606 GN=INF2 PE=1 SV=2
O95861	24	6	6		23933000	25418000	28924000	33392	3'(2') 5'-bisphosphate nucleotidase 1 OS=Homo sapiens OX=9606 GN=BPNT1 PE=1 SV=1
Q96KA5	28	9	9		12607000	21773000	16843000	62229	Cleft lip and palate transmembrane protein 1-like protein OS=Homo sapiens OX=9606 GN=CLPTM1L PE=1 SV=1
Q6WKZ4	9	6	6		12394000	5373700	9318400	137167	Rab11 family-interacting protein 1 OS=Homo sapiens OX=9606 GN=RAB11FIP1 PE=1 SV=3
Q86V81	42	18	18	Acetylation (Protein N-term)	291100000	152170000	256230000	26888	THO complex subunit 4 OS=Homo sapiens OX=9606 GN=ALYREF PE=1 SV=3
P48960	16	10	9		27773000	31464000	31324000	91869	Adhesion G protein-coupled receptor E5 OS=Homo sapiens OX=9606 GN=ADGRE5 PE=1 SV=4
P06576	75	34	34	Oxidation (M)	705880000	517820000	595470000	56560	ATP synthase subunit beta mitochondrial OS=Homo sapiens OX=9606 GN=ATP5F1B PE=1 SV=3
Q04206	12	5	5		8841800	28453000	28617000	60219	Transcription factor p65 OS=Homo sapiens OX=9606 GN=RELA PE=1 SV=2
O95453	10	5	5		7550800	20167000	18261000	73451	Poly(A)-specific ribonuclease PARN OS=Homo sapiens OX=9606 GN=PARN PE=1 SV=1
Q8IWE2	11	4	4		5388000	4048900	5635800	60742	Protein NOXP20 OS=Homo sapiens OX=9606 GN=FAM114A1 PE=1 SV=2
P55263	27	11	11	Acetylation (Protein N-term)	50003000	97862000	66594000	40545	Adenosine kinase OS=Homo sapiens OX=9606 GN=ADK PE=1 SV=2
P31942	64	19	19	Oxidation (M)	141330000	201470000	215740000	36926	Heterogeneous nuclear ribonucleoprotein H3 OS=Homo sapiens OX=9606 GN=HNRNPH3 PE=1 SV=2
Q15022	16	7	7		3407500	10091000	3444900	83055	Polycomb protein SUZ12 OS=Homo sapiens OX=9606 GN=SUZ12 PE=1 SV=3
P62306	40	4	4	Oxidation (M); Acetylation (Protein N-term)	35348000	18854000	20374000	9725	Small nuclear ribonucleoprotein F OS=Homo sapiens OX=9606 GN=SNRPF PE=1 SV=1
P49790	26	26	26		121830000	147780000	152250000	153938	Nuclear pore complex protein Nup153 OS=Homo sapiens OX=9606 GN=NUP153 PE=1 SV=2
Q9H910	47	7	7	Acetylation (Protein N-term)	62206000	116890000	105500000	20063	Jupiter microtubule associated homolog 2 OS=Homo sapiens OX=9606 GN=JPT2 PE=1 SV=1
Q9UQB8	9	4	4		2319200	6878200	6636800	60868	Brain-specific angiogenesis inhibitor 1-associated protein 2 OS=Homo sapiens OX=9606 GN=BAIAP2 PE=1 SV=1
P62910	36	12	12		385790000	346720000	257760000	15860	60S ribosomal protein L32 OS=Homo sapiens OX=9606 GN=RPL32 PE=1 SV=2
P06756	10	7	7		13757000	12965000	24070000	116038	Integrin alpha-V OS=Homo sapiens OX=9606 GN=ITGAV PE=1 SV=2
Q9UKN8	22	11	11		13938000	18723000	26206000	91982	General transcription factor 3C polypeptide 4 OS=Homo sapiens OX=9606 GN=GTF3C4 PE=1 SV=2
Q9BVI4	53	19	19	Acetylation (Protein N-term)	123580000	103270000	96838000	58468	Nucleolar complex protein 4 homolog OS=Homo sapiens OX=9606 GN=NOC4L PE=1 SV=1
Q3MHD2	31	4	4		191870000	49955000	110090000	21701	Protein LSM12 homolog OS=Homo sapiens OX=9606 GN=LSM12 PE=1 SV=2
P56211	50	4	3	Acetylation (Protein N-term)	25272000	44992000	48756000	12323	cAMP-regulated phosphoprotein 19 OS=Homo sapiens OX=9606 GN=ARPP19 PE=1 SV=2
O60502	19	12	12		9552700	39346000	26045000	102915	Protein O-GlcNAcase OS=Homo sapiens OX=9606 GN=OGA PE=1 SV=2
P19623	35	9	9	Acetylation (Protein N-term)	71454000	115100000	119830000	33825	Spermidine synthase OS=Homo sapiens OX=9606 GN=SRM PE=1 SV=1
Q9BXW9	4	4	4		2915400	4721200	5979300	164128	Fanconi anemia group D2 protein OS=Homo sapiens OX=9606 GN=FANCD2 PE=1 SV=2
Q8IWZ3	5	8	4		7834900	2579000	2622000	269455	Ankyrin repeat and KH domain-containing protein 1 OS=Homo sapiens OX=9606 GN=ANKHD1 PE=1 SV=1
P35222	17	9	8		15957000	18974000	11575000	85497	Catenin beta-1 OS=Homo sapiens OX=9606 GN=CTNNB1 PE=1 SV=1
Q9UHD1	24	8	8		47169000	148840000	161070000	37490	Cysteine and histidine-rich domain-containing protein 1 OS=Homo sapiens OX=9606 GN=CHORDC1 PE=1 SV=2
P07900	64	91	51	Oxidation (M)	2056300000	5719600000	5269000000	84660	Heat shock protein HSP 90-alpha OS=Homo sapiens OX=9606 GN=HSP90AA1 PE=1 SV=5
Q96T76	7	4	4		2217000	2164600	2022800	113289	MMS19 nucleotide excision repair protein homolog OS=Homo sapiens OX=9606 GN=MMS19 PE=1 SV=2
Q9BTE3	16	7	7		30354000	18968000	29827000	72980	Mini-chromosome maintenance complex-binding protein OS=Homo sapiens OX=9606 GN=MCMBP PE=1 SV=2
Q96C19	31	8	8		20814000	48302000	44841000	26697	EF-hand domain-containing protein D2 OS=Homo sapiens OX=9606 GN=EFHD2 PE=1 SV=1
Q8NEJ9	26	4	4		13860000	1995700	2216100	35894	Neuroguidin OS=Homo sapiens OX=9606 GN=NGDN PE=1 SV=1
Q9UL46	52	14	14		114560000	126610000	127050000	27402	Proteasome activator complex subunit 2 OS=Homo sapiens OX=9606 GN=PSME2 PE=1 SV=4
P06737	45	32	27	Acetylation (Protein N-term)	109610000	112540000	125570000	97149	Glycogen phosphorylase liver form OS=Homo sapiens OX=9606 GN=PYGL PE=1 SV=4
P21912	37	10	10		119010000	54867000	117940000	31630	Succinate dehydrogenase [ubiquinone] iron-sulfur subunit mitochondrial OS=Homo sapiens OX=9606 GN=SDHB PE=1 SV=3
Q6FI81	26	7	7		53299000	113130000	94705000	33582	Anamorsin OS=Homo sapiens OX=9606 GN=CIAPIN1 PE=1 SV=2
O75380	31	3	3		405570	1417700	1661700	13712	NADH dehydrogenase [ubiquinone] iron-sulfur protein 6 mitochondrial OS=Homo sapiens OX=9606 GN=NDUFS6 PE=1 SV=1
P51452	26	4	4		7487300	23155000	24820000	20478	Dual specificity protein phosphatase 3 OS=Homo sapiens OX=9606 GN=DUSP3 PE=1 SV=1
Q9BTT0	24	7	6		48668000	95385000	129320000	30692	Acidic leucine-rich nuclear phosphoprotein 32 family member E OS=Homo sapiens OX=9606 GN=ANP32E PE=1 SV=1
Q9BSC4	16	8	7		47866000	59303000	102860000	80302	Nucleolar protein 10 OS=Homo sapiens OX=9606 GN=NOL10 PE=1 SV=1
A6NHR9	2	3	3		783750	290610	263770	226372	Structural maintenance of chromosomes flexible hinge domain-containing protein 1 OS=Homo sapiens OX=9606 GN=SMCHD1 PE=1 SV=2
Q9NPI6	14	4	4		1400600	259510	0	63279	mRNA-decapping enzyme 1A OS=Homo sapiens OX=9606 GN=DCP1A PE=1 SV=3
Q13206	15	10	9		191470000	203110000	321460000	100888	Probable ATP-dependent RNA helicase DDX10 OS=Homo sapiens OX=9606 GN=DDX10 PE=1 SV=2
Q92621	23	39	39	Acetylation (Protein N-term)	101060000	180950000	157610000	227919	Nuclear pore complex protein Nup205 OS=Homo sapiens OX=9606 GN=NUP205 PE=1 SV=3
P49755	44	10	10	Oxidation (M)	69210000	63619000	52281000	24976	Transmembrane emp24 domain-containing protein 10 OS=Homo sapiens OX=9606 GN=TMED10 PE=1 SV=2
P00367	41	20	20		160110000	418800000	275840000	61398	Glutamate dehydrogenase 1 mitochondrial OS=Homo sapiens OX=9606 GN=GLUD1 PE=1 SV=2
Q13641	14	4	4		2513100	1939600	5113200	46032	Trophoblast glycoprotein OS=Homo sapiens OX=9606 GN=TPBG PE=1 SV=1
Q9H7E2	5	2	2		11213000	2376600	1761800	73185	Tudor domain-containing protein 3 OS=Homo sapiens OX=9606 GN=TDRD3 PE=1 SV=1
Q9BR76	21	7	7		24943000	38306000	45765000	54235	Coronin-1B OS=Homo sapiens OX=9606 GN=CORO1B PE=1 SV=1
Q07960	33	14	14		94829000	141770000	153950000	50436	Rho GTPase-activating protein 1 OS=Homo sapiens OX=9606 GN=ARHGAP1 PE=1 SV=1
P41743	9	4	4	Acetylation (Protein N-term)	2327300	5438500	7690500	68262	Protein kinase C iota type OS=Homo sapiens OX=9606 GN=PRKCI PE=1 SV=2
P23284	58	18	18		367560000	339700000	346510000	23743	Peptidyl-prolyl cis-trans isomerase B OS=Homo sapiens OX=9606 GN=PPIB PE=1 SV=2
O15042	33	24	24		102520000	126050000	138620000	118292	U2 snRNP-associated SURP motif-containing protein OS=Homo sapiens OX=9606 GN=U2SURP PE=1 SV=2
Q9Y6K9	13	3	3		5051900	8508800	9755900	48198	NF-kappa-B essential modulator OS=Homo sapiens OX=9606 GN=IKBKG PE=1 SV=2
Q9Y5S2	3	3	3		1754000	0	0	194314	Serine/threonine-protein kinase MRCK beta OS=Homo sapiens OX=9606 GN=CDC42BPB PE=1 SV=2
Q96TA2	14	8	8		91979000	81948000	131550000	86455	ATP-dependent zinc metalloprotease YME1L1 OS=Homo sapiens OX=9606 GN=YME1L1 PE=1 SV=2
P46100	8	14	14	Oxidation (M)	17683000	40962000	38942000	282584	Transcriptional regulator ATRX OS=Homo sapiens OX=9606 GN=ATRX PE=1 SV=5
O76021	47	35	35	Oxidation (M); Acetylation (Protein N-term)	258160000	376800000	356520000	54973	Ribosomal L1 domain-containing protein 1 OS=Homo sapiens OX=9606 GN=RSL1D1 PE=1 SV=3
P49915	51	33	33	Oxidation (M)	160560000	450550000	470150000	76716	GMP synthase [glutamine-hydrolyzing] OS=Homo sapiens OX=9606 GN=GMPS PE=1 SV=1
Q9HC07	20	4	4		7881100	4858600	11353000	34906	Transmembrane protein 165 OS=Homo sapiens OX=9606 GN=TMEM165 PE=1 SV=1
Q9UBQ0	35	5	5		42071000	85143000	65738000	20506	Vacuolar protein sorting-associated protein 29 OS=Homo sapiens OX=9606 GN=VPS29 PE=1 SV=1
Q96G03	11	5	5		13307000	10489000	8276500	68283	Phosphoglucomutase-2 OS=Homo sapiens OX=9606 GN=PGM2 PE=1 SV=4
O75792	13	3	3		3587100	2320700	4823200	33395	Ribonuclease H2 subunit A OS=Homo sapiens OX=9606 GN=RNASEH2A PE=1 SV=2
Q9P0L0	51	16	15	Acetylation (Protein N-term)	177600000	207660000	161050000	27893	Vesicle-associated membrane protein-associated protein A OS=Homo sapiens OX=9606 GN=VAPA PE=1 SV=3
P42126	15	4	4		39873000	106380000	58648000	32816	Enoyl-CoA delta isomerase 1 mitochondrial OS=Homo sapiens OX=9606 GN=ECI1 PE=1 SV=1
P46459	21	14	13		86483000	72747000	69388000	82594	Vesicle-fusing ATPase OS=Homo sapiens OX=9606 GN=NSF PE=1 SV=3
O14818	53	14	14		182170000	146020000	112880000	27887	Proteasome subunit alpha type-7 OS=Homo sapiens OX=9606 GN=PSMA7 PE=1 SV=1
Q9BTV4	49	11	11		23806000	10891000	7467300	44876	Transmembrane protein 43 OS=Homo sapiens OX=9606 GN=TMEM43 PE=1 SV=1
P63027	59	5	2	Acetylation (Protein N-term)	5004200	18104000	11780000	12663	Vesicle-associated membrane protein 2 OS=Homo sapiens OX=9606 GN=VAMP2 PE=1 SV=3
P62316	48	9	9		200060000	132370000	163340000	13527	Small nuclear ribonucleoprotein Sm D2 OS=Homo sapiens OX=9606 GN=SNRPD2 PE=1 SV=1
Q92552	30	10	10		22261000	57041000	75530000	47611	28S ribosomal protein S27 mitochondrial OS=Homo sapiens OX=9606 GN=MRPS27 PE=1 SV=3
O60925	35	4	4	Acetylation (Protein N-term)	30088000	39923000	37141000	14210	Prefoldin subunit 1 OS=Homo sapiens OX=9606 GN=PFDN1 PE=1 SV=2
Q9H2U2	21	5	5		15181000	24720000	16840000	37920	Inorganic pyrophosphatase 2 mitochondrial OS=Homo sapiens OX=9606 GN=PPA2 PE=1 SV=2
Q53EL6	43	18	18		115350000	157640000	133280000	51735	Programmed cell death protein 4 OS=Homo sapiens OX=9606 GN=PDCD4 PE=1 SV=2
Q6UW68	16	2	2		28067000	12012000	23190000	21198	Transmembrane protein 205 OS=Homo sapiens OX=9606 GN=TMEM205 PE=1 SV=1
Q9Y2H6	5	3	3		213770000	98134000	148010000	131852	Fibronectin type-III domain-containing protein 3A OS=Homo sapiens OX=9606 GN=FNDC3A PE=1 SV=4
Q86WA8	6	3	3		2065000	562290	548930	94617	Lon protease homolog 2 peroxisomal OS=Homo sapiens OX=9606 GN=LONP2 PE=1 SV=1
P62899	46	13	13	Oxidation (M)	399780000	577040000	524930000	14463	60S ribosomal protein L31 OS=Homo sapiens OX=9606 GN=RPL31 PE=1 SV=1
Q9H0P0	13	3	3		5167100	20353000	6276900	37948	Cytosolic 5'-nucleotidase 3A OS=Homo sapiens OX=9606 GN=NT5C3A PE=1 SV=3
Q96RP9	18	11	11		90409000	18216000	18357000	83472	Elongation factor G mitochondrial OS=Homo sapiens OX=9606 GN=GFM1 PE=1 SV=2
P05362	15	8	8		12923000	39655000	29092000	57825	Intercellular adhesion molecule 1 OS=Homo sapiens OX=9606 GN=ICAM1 PE=1 SV=2
Q9Y6K5	9	6	6	Acetylation (Protein N-term)	7571600	27114000	25157000	121170	2'-5'-oligoadenylate synthase 3 OS=Homo sapiens OX=9606 GN=OAS3 PE=1 SV=3
O15460	11	4	4		26808000	9487300	7092500	60902	Prolyl 4-hydroxylase subunit alpha-2 OS=Homo sapiens OX=9606 GN=P4HA2 PE=1 SV=1
Q15428	25	8	8	Acetylation (Protein N-term)	96092000	37879000	56930000	49256	Splicing factor 3A subunit 2 OS=Homo sapiens OX=9606 GN=SF3A2 PE=1 SV=2
Q9Y6V7	20	5	5		1369400	3323100	2893300	54226	Probable ATP-dependent RNA helicase DDX49 OS=Homo sapiens OX=9606 GN=DDX49 PE=1 SV=1
Q8NB90	6	4	3		6059000	1003300	2847100	97904	ATPase family protein 2 homolog OS=Homo sapiens OX=9606 GN=SPATA5 PE=1 SV=3
Q7Z2T5	25	9	9	Acetylation (Protein N-term)	9426000	3783800	2401000	81747	TRMT1-like protein OS=Homo sapiens OX=9606 GN=TRMT1L PE=1 SV=2
Q13111	6	3	3		7160200	1795500	222430	106910	Chromatin assembly factor 1 subunit A OS=Homo sapiens OX=9606 GN=CHAF1A PE=1 SV=3
P53367	17	4	4		8561700	30463000	12789000	41738	Arfaptin-1 OS=Homo sapiens OX=9606 GN=ARFIP1 PE=1 SV=2
Q9UKL0	23	7	7		9794200	26215000	37668000	53327	REST corepressor 1 OS=Homo sapiens OX=9606 GN=RCOR1 PE=1 SV=2
P82650	32	11	11		25792000	54066000	62846000	41280	28S ribosomal protein S22 mitochondrial OS=Homo sapiens OX=9606 GN=MRPS22 PE=1 SV=1
P12955	11	3	3	Acetylation (Protein N-term)	2156100	1762700	5350500	54548	Xaa-Pro dipeptidase OS=Homo sapiens OX=9606 GN=PEPD PE=1 SV=3
Q15691	50	13	13	Oxidation (M); Acetylation (Protein N-term)	238590000	458750000	454080000	29999	Microtubule-associated protein RP/EB family member 1 OS=Homo sapiens OX=9606 GN=MAPRE1 PE=1 SV=3
Q9Y512	25	7	7		1766400000	32921000	31496000	51976	Sorting and assembly machinery component 50 homolog OS=Homo sapiens OX=9606 GN=SAMM50 PE=1 SV=3
O14925	38	3	3		8772500	1918500	3392500	21943	Mitochondrial import inner membrane translocase subunit Tim23 OS=Homo sapiens OX=9606 GN=TIMM23 PE=1 SV=1
Q9NR09	2	5	5		2506200	4606500	6175300	530260	Baculoviral IAP repeat-containing protein 6 OS=Homo sapiens OX=9606 GN=BIRC6 PE=1 SV=2
Q9H6S0	10	9	9		10757000	10796000	17565000	160248	3'-5' RNA helicase YTHDC2 OS=Homo sapiens OX=9606 GN=YTHDC2 PE=1 SV=2
P31947	65	17	13	Oxidation (M)	211930000	480700000	405230000	27774	14-3-3 protein sigma OS=Homo sapiens OX=9606 GN=SFN PE=1 SV=1
O75844	27	11	11		29255000	441450000	52003000	54813	CAAX prenyl protease 1 homolog OS=Homo sapiens OX=9606 GN=ZMPSTE24 PE=1 SV=2
Q8TBB5	8	3	3		5459900	7964300	34646000	57892	Kelch domain-containing protein 4 OS=Homo sapiens OX=9606 GN=KLHDC4 PE=1 SV=1
Q8IUH3	6	2	2		1862400	402690	247680	53503	RNA-binding protein 45 OS=Homo sapiens OX=9606 GN=RBM45 PE=1 SV=1
P46937	33	7	7		9278600	29378000	22799000	54462	Transcriptional coactivator YAP1 OS=Homo sapiens OX=9606 GN=YAP1 PE=1 SV=2
Q14671	14	9	7		11764000	20401000	33256000	126473	Pumilio homolog 1 OS=Homo sapiens OX=9606 GN=PUM1 PE=1 SV=3
O60216	30	14	14		19491000	29559000	42145000	71690	Double-strand-break repair protein rad21 homolog OS=Homo sapiens OX=9606 GN=RAD21 PE=1 SV=2
P35610	11	6	6		13729000	34375000	51390000	64735	Sterol O-acyltransferase 1 OS=Homo sapiens OX=9606 GN=SOAT1 PE=1 SV=3
Q9HBH5	21	7	7		4135300	14029000	14216000	36865	Retinol dehydrogenase 14 OS=Homo sapiens OX=9606 GN=RDH14 PE=1 SV=1
P07437	72	92	18	Carbamidomethylation; Oxidation (M)	981150000	1472600000	1736300000	49671	Tubulin beta chain OS=Homo sapiens OX=9606 GN=TUBB PE=1 SV=2
P23246	56	61	58	Oxidation (M)	1131000000	1837000000	1727600000	76150	Splicing factor proline- and glutamine-rich OS=Homo sapiens OX=9606 GN=SFPQ PE=1 SV=2
Q5TDH0	18	4	4		3599200	5230000	6282800	44523	Protein DDI1 homolog 2 OS=Homo sapiens OX=9606 GN=DDI2 PE=1 SV=1
P31939	58	28	28	Oxidation (M); Acetylation (Protein N-term)	459860000	395440000	460980000	64616	Bifunctional purine biosynthesis protein ATIC OS=Homo sapiens OX=9606 GN=ATIC PE=1 SV=3
A0AV96	14	3	3		33446000	1040800	1442200	64099	RNA-binding protein 47 OS=Homo sapiens OX=9606 GN=RBM47 PE=1 SV=2
Q9UI12	18	5	5	Oxidation (M)	5570000	9812100	8875200	55883	V-type proton ATPase subunit H OS=Homo sapiens OX=9606 GN=ATP6V1H PE=1 SV=1
Q15126	22	3	3		11073000	5279400	9221400	21995	Phosphomevalonate kinase OS=Homo sapiens OX=9606 GN=PMVK PE=1 SV=3
Q9H9Y6	4	3	3		311940	91157	122050	128229	DNA-directed RNA polymerase I subunit RPA2 OS=Homo sapiens OX=9606 GN=POLR1B PE=1 SV=2
P50148	20	6	3		6527500	708840	389990	42142	Guanine nucleotide-binding protein G(q) subunit alpha OS=Homo sapiens OX=9606 GN=GNAQ PE=1 SV=4
P16949	61	12	11	Acetylation (Protein N-term)	620820000	762760000	646440000	17302	Stathmin OS=Homo sapiens OX=9606 GN=STMN1 PE=1 SV=3
P12081	32	15	9		86273000	78158000	95726000	57411	Histidine--tRNA ligase cytoplasmic OS=Homo sapiens OX=9606 GN=HARS1 PE=1 SV=2
P32119	51	16	12		626100000	483390000	374540000	21892	Peroxiredoxin-2 OS=Homo sapiens OX=9606 GN=PRDX2 PE=1 SV=5
Q9Y570	31	8	8		52522000	28168000	27480000	42315	Protein phosphatase methylesterase 1 OS=Homo sapiens OX=9606 GN=PPME1 PE=1 SV=3
P34897	56	22	21		156090000	178180000	145700000	55993	Serine hydroxymethyltransferase mitochondrial OS=Homo sapiens OX=9606 GN=SHMT2 PE=1 SV=3
O94763	13	3	3	Acetylation (Protein N-term)	902750	2881800	2951900	59832	Unconventional prefoldin RPB5 interactor 1 OS=Homo sapiens OX=9606 GN=URI1 PE=1 SV=3
P08237	28	16	15		114320000	186060000	207240000	85183	ATP-dependent 6-phosphofructokinase muscle type OS=Homo sapiens OX=9606 GN=PFKM PE=1 SV=2
P30519	55	15	15	Acetylation (Protein N-term)	31999000	44470000	68647000	36033	Heme oxygenase 2 OS=Homo sapiens OX=9606 GN=HMOX2 PE=1 SV=2
Q13330	11	7	3		7916200	9066500	4571700	80786	Metastasis-associated protein MTA1 OS=Homo sapiens OX=9606 GN=MTA1 PE=1 SV=2
Q9BWM7	24	6	6		15650000	11735000	5698300	35503	Sideroflexin-3 OS=Homo sapiens OX=9606 GN=SFXN3 PE=1 SV=3
Q13151	40	12	12		239810000	177890000	202030000	30841	Heterogeneous nuclear ribonucleoprotein A0 OS=Homo sapiens OX=9606 GN=HNRNPA0 PE=1 SV=1
P33527	11	11	11		12474000	23163000	16530000	171590	Multidrug resistance-associated protein 1 OS=Homo sapiens OX=9606 GN=ABCC1 PE=1 SV=3
Q5VTL8	10	4	4		6473700	17083000	20235000	64468	Pre-mRNA-splicing factor 38B OS=Homo sapiens OX=9606 GN=PRPF38B PE=1 SV=1
P16219	8	2	2		7393900	5407100	1142800	44297	Short-chain specific acyl-CoA dehydrogenase mitochondrial OS=Homo sapiens OX=9606 GN=ACADS PE=1 SV=1
Q86V21	7	4	4		2821200	8685500	8863900	75144	Acetoacetyl-CoA synthetase OS=Homo sapiens OX=9606 GN=AACS PE=1 SV=1
Q9H4G0	18	13	11		34311000	64600000	65404000	98503	Band 4.1-like protein 1 OS=Homo sapiens OX=9606 GN=EPB41L1 PE=1 SV=2
Q9UMY1	21	5	5		14678000	34851000	14177000	29426	Nucleolar protein 7 OS=Homo sapiens OX=9606 GN=NOL7 PE=1 SV=2
Q9BW92	12	6	6		18376000	88605000	25966000	81036	Threonine--tRNA ligase mitochondrial OS=Homo sapiens OX=9606 GN=TARS2 PE=1 SV=1
Q10567	20	16	8		30151000	98732000	62353000	104637	AP-1 complex subunit beta-1 OS=Homo sapiens OX=9606 GN=AP1B1 PE=1 SV=2
P61254	52	15	4		71913000	200670000	136110000	17258	60S ribosomal protein L26 OS=Homo sapiens OX=9606 GN=RPL26 PE=1 SV=1
O95347	34	34	34		238330000	273650000	187280000	135656	Structural maintenance of chromosomes protein 2 OS=Homo sapiens OX=9606 GN=SMC2 PE=1 SV=2
Q8N5K1	22	3	3		13450000	50657000	44810000	15278	CDGSH iron-sulfur domain-containing protein 2 OS=Homo sapiens OX=9606 GN=CISD2 PE=1 SV=1
Q8NDF8	6	2	2		1793300	587190	3148300	63267	Terminal nucleotidyltransferase 4B OS=Homo sapiens OX=9606 GN=TENT4B PE=1 SV=2
Q6P2E9	33	26	26		39497000	53642000	50195000	151661	Enhancer of mRNA-decapping protein 4 OS=Homo sapiens OX=9606 GN=EDC4 PE=1 SV=1
P21333	51	138	118	Oxidation (M)	5914800000	3646100000	3981600000	280737	Filamin-A OS=Homo sapiens OX=9606 GN=FLNA PE=1 SV=4
P14618	69	79	79	Carbamidomethylation; Oxidation (M); Acetylation (Protein N-term)	10456000000	7380500000	7741600000	57937	Pyruvate kinase PKM OS=Homo sapiens OX=9606 GN=PKM PE=1 SV=4
P22694	32	12	2		3472800	30926000	45857000	40623	cAMP-dependent protein kinase catalytic subunit beta OS=Homo sapiens OX=9606 GN=PRKACB PE=1 SV=2
P46783	64	18	17		417760000	603590000	592040000	18898	40S ribosomal protein S10 OS=Homo sapiens OX=9606 GN=RPS10 PE=1 SV=1
Q6UN15	16	7	7		12373000	35552000	34061000	66526	Pre-mRNA 3'-end-processing factor FIP1 OS=Homo sapiens OX=9606 GN=FIP1L1 PE=1 SV=1
P49756	27	24	24		83077000	111460000	97163000	100186	RNA-binding protein 25 OS=Homo sapiens OX=9606 GN=RBM25 PE=1 SV=3
Q53HL2	27	6	6		10080000	6691600	3052500	31323	Borealin OS=Homo sapiens OX=9606 GN=CDCA8 PE=1 SV=2
Q9NYF8	33	30	29		179630000	328610000	239870000	106122	Bcl-2-associated transcription factor 1 OS=Homo sapiens OX=9606 GN=BCLAF1 PE=1 SV=2
Q12905	65	26	26		544570000	563520000	697080000	43062	Interleukin enhancer-binding factor 2 OS=Homo sapiens OX=9606 GN=ILF2 PE=1 SV=2
P49257	17	7	7	Oxidation (M)	18101000	30980000	36269000	57549	Protein ERGIC-53 OS=Homo sapiens OX=9606 GN=LMAN1 PE=1 SV=2
Q9BY42	22	5	5		9497400	16518000	9907900	33887	Replication termination factor 2 OS=Homo sapiens OX=9606 GN=RTF2 PE=1 SV=3
O75347	56	10	10		87690000	347990000	286530000	12855	Tubulin-specific chaperone A OS=Homo sapiens OX=9606 GN=TBCA PE=1 SV=3
Q6PK04	25	6	6		22590000	77007000	71344000	33231	Coiled-coil domain-containing protein 137 OS=Homo sapiens OX=9606 GN=CCDC137 PE=1 SV=1
Q05639	54	48	19	Oxidation (M)	118920000	288160000	362150000	50470	Elongation factor 1-alpha 2 OS=Homo sapiens OX=9606 GN=EEF1A2 PE=1 SV=1
P37235	46	10	10		39854000	34394000	34861000	22313	Hippocalcin-like protein 1 OS=Homo sapiens OX=9606 GN=HPCAL1 PE=1 SV=3
P63010	30	22	14		44506000	67679000	103090000	104553	AP-2 complex subunit beta OS=Homo sapiens OX=9606 GN=AP2B1 PE=1 SV=1
P13807	19	9	9		4997900	11772000	17019000	83786	Glycogen [starch] synthase muscle OS=Homo sapiens OX=9606 GN=GYS1 PE=1 SV=2
P36542	31	10	10		58203000	92256000	117150000	32996	ATP synthase subunit gamma mitochondrial OS=Homo sapiens OX=9606 GN=ATP5F1C PE=1 SV=1
P25705	60	37	37	Oxidation (M)	777220000	637930000	491400000	59751	ATP synthase subunit alpha mitochondrial OS=Homo sapiens OX=9606 GN=ATP5F1A PE=1 SV=1
Q5XKP0	36	3	3		2733600	8430400	5234100	13087	MICOS complex subunit MIC13 OS=Homo sapiens OX=9606 GN=MICOS13 PE=1 SV=1
O15357	8	7	7		4949500	14907000	14611000	138599	Phosphatidylinositol 3 4 5-trisphosphate 5-phosphatase 2 OS=Homo sapiens OX=9606 GN=INPPL1 PE=1 SV=2
Q15149	60	315	301	Carbamidomethylation; Oxidation (M)	5222700000	5058100000	4980300000	531796	Plectin OS=Homo sapiens OX=9606 GN=PLEC PE=1 SV=3
Q12849	35	9	9		22033000	42484000	38804000	53126	G-rich sequence factor 1 OS=Homo sapiens OX=9606 GN=GRSF1 PE=1 SV=3
Q7KZF4	57	61	61	Oxidation (M); Acetylation (Protein N-term)	828260000	1261400000	1221600000	101997	Staphylococcal nuclease domain-containing protein 1 OS=Homo sapiens OX=9606 GN=SND1 PE=1 SV=1
O14949	41	4	4		23980000	74727000	71951000	9906	Cytochrome b-c1 complex subunit 8 OS=Homo sapiens OX=9606 GN=UQCRQ PE=1 SV=4
Q15003	23	11	11		31323000	39235000	59707000	82563	Condensin complex subunit 2 OS=Homo sapiens OX=9606 GN=NCAPH PE=1 SV=3
P56545	15	6	3		9816800	8832300	16409000	48945	C-terminal-binding protein 2 OS=Homo sapiens OX=9606 GN=CTBP2 PE=1 SV=1
P62253	24	3	3	Acetylation (Protein N-term)	2686800	1805400	2977000	19509	Ubiquitin-conjugating enzyme E2 G1 OS=Homo sapiens OX=9606 GN=UBE2G1 PE=1 SV=3
Q9Y2R0	18	2	2		50985000	4554500	10268000	11731	Cytochrome c oxidase assembly factor 3 homolog mitochondrial OS=Homo sapiens OX=9606 GN=COA3 PE=1 SV=1
Q9NQ55	34	13	13		103970000	97247000	245520000	53194	Suppressor of SWI4 1 homolog OS=Homo sapiens OX=9606 GN=PPAN PE=2 SV=1
Q9NTJ3	40	42	42		168660000	215550000	252760000	147182	Structural maintenance of chromosomes protein 4 OS=Homo sapiens OX=9606 GN=SMC4 PE=1 SV=2
Q92643	17	5	5		4055200	5003100	3280200	45252	GPI-anchor transamidase OS=Homo sapiens OX=9606 GN=PIGK PE=1 SV=2
P63173	53	7	7		104250000	272060000	243810000	8218	60S ribosomal protein L38 OS=Homo sapiens OX=9606 GN=RPL38 PE=1 SV=2
P17844	64	59	46	Carbamidomethylation; Oxidation (M)	655170000	931660000	845270000	69148	Probable ATP-dependent RNA helicase DDX5 OS=Homo sapiens OX=9606 GN=DDX5 PE=1 SV=1
Q96PK6	40	24	24		233170000	549970000	378770000	69492	RNA-binding protein 14 OS=Homo sapiens OX=9606 GN=RBM14 PE=1 SV=2
P42765	51	12	12		37621000	65084000	77507000	41924	3-ketoacyl-CoA thiolase mitochondrial OS=Homo sapiens OX=9606 GN=ACAA2 PE=1 SV=2
Q9BSJ2	4	4	3		5167300	4098000	6397900	102534	Gamma-tubulin complex component 2 OS=Homo sapiens OX=9606 GN=TUBGCP2 PE=1 SV=2
P30050	33	9	9		411190000	402630000	432420000	17819	60S ribosomal protein L12 OS=Homo sapiens OX=9606 GN=RPL12 PE=1 SV=1
P24941	49	11	9	Oxidation (M)	38991000	45657000	65748000	33930	Cyclin-dependent kinase 2 OS=Homo sapiens OX=9606 GN=CDK2 PE=1 SV=2
Q92930	35	8	2		13804000	16021000	8244300	23584	Ras-related protein Rab-8B OS=Homo sapiens OX=9606 GN=RAB8B PE=1 SV=2
Q15084	55	22	22		220650000	454380000	498860000	48121	Protein disulfide-isomerase A6 OS=Homo sapiens OX=9606 GN=PDIA6 PE=1 SV=1
O95155	15	11	11		11246000	19168000	24789000	146184	Ubiquitin conjugation factor E4 B OS=Homo sapiens OX=9606 GN=UBE4B PE=1 SV=1
Q9UBC2	8	5	5		4750400	15266000	6646100	94255	Epidermal growth factor receptor substrate 15-like 1 OS=Homo sapiens OX=9606 GN=EPS15L1 PE=1 SV=1
Q9H6W3	11	4	4		566870	1547300	2422000	71086	Ribosomal oxygenase 1 OS=Homo sapiens OX=9606 GN=RIOX1 PE=1 SV=2
P31949	55	9	9		375070000	962800000	715520000	11740	Protein S100-A11 OS=Homo sapiens OX=9606 GN=S100A11 PE=1 SV=2
Q14914	43	12	12		93205000	158830000	169950000	35870	Prostaglandin reductase 1 OS=Homo sapiens OX=9606 GN=PTGR1 PE=1 SV=2
P13473	5	2	2		91983000	5790300	9865800	44961	Lysosome-associated membrane glycoprotein 2 OS=Homo sapiens OX=9606 GN=LAMP2 PE=1 SV=2
Q99471	55	6	6	Acetylation (Protein N-term)	74731000	77333000	78688000	17328	Prefoldin subunit 5 OS=Homo sapiens OX=9606 GN=PFDN5 PE=1 SV=2
Q8NI27	9	12	12	Acetylation (Protein N-term)	17866000	20137000	25153000	182774	THO complex subunit 2 OS=Homo sapiens OX=9606 GN=THOC2 PE=1 SV=2
Q99720	29	3	3		13105000	17255000	20763000	25128	Sigma non-opioid intracellular receptor 1 OS=Homo sapiens OX=9606 GN=SIGMAR1 PE=1 SV=1
Q00839	50	74	74	Carbamidomethylation; Oxidation (M); Acetylation (Protein N-term)	1865900000	3097000000	2805400000	90585	Heterogeneous nuclear ribonucleoprotein U OS=Homo sapiens OX=9606 GN=HNRNPU PE=1 SV=6
Q9HC36	24	5	5		6209900	14786000	8950800	47020	rRNA methyltransferase 3 mitochondrial OS=Homo sapiens OX=9606 GN=MRM3 PE=1 SV=2
P51532	17	23	12		23280000	43753000	27890000	184644	Transcription activator BRG1 OS=Homo sapiens OX=9606 GN=SMARCA4 PE=1 SV=2
P55036	27	9	9		70377000	140200000	144860000	40737	26S proteasome non-ATPase regulatory subunit 4 OS=Homo sapiens OX=9606 GN=PSMD4 PE=1 SV=1
P51665	45	11	11		55128000	106530000	79920000	37025	26S proteasome non-ATPase regulatory subunit 7 OS=Homo sapiens OX=9606 GN=PSMD7 PE=1 SV=2
O00220	10	3	3		1103200	3329000	2044100	50089	Tumor necrosis factor receptor superfamily member 10A OS=Homo sapiens OX=9606 GN=TNFRSF10A PE=1 SV=3
Q8NBJ5	40	20	20		312110000	149510000	179560000	71636	Procollagen galactosyltransferase 1 OS=Homo sapiens OX=9606 GN=COLGALT1 PE=1 SV=1
Q9H9T3	27	10	10		34065000	53699000	22227000	62259	Elongator complex protein 3 OS=Homo sapiens OX=9606 GN=ELP3 PE=1 SV=2
O43707	70	78	53	Oxidation (M); Acetylation (Protein N-term)	2458000000	2064800000	2262800000	104854	Alpha-actinin-4 OS=Homo sapiens OX=9606 GN=ACTN4 PE=1 SV=2
O43175	32	17	16	Oxidation (M)	474180000	443470000	343850000	56651	D-3-phosphoglycerate dehydrogenase OS=Homo sapiens OX=9606 GN=PHGDH PE=1 SV=4
Q08722	6	2	2		9256200	56620000	111250000	35214	Leukocyte surface antigen CD47 OS=Homo sapiens OX=9606 GN=CD47 PE=1 SV=1
Q641Q2	6	5	5		3834300	7182500	5715700	147183	WASH complex subunit 2A OS=Homo sapiens OX=9606 GN=WASHC2A PE=1 SV=3
Q9NPJ6	11	2	2		199300	467520	1653400	29745	Mediator of RNA polymerase II transcription subunit 4 OS=Homo sapiens OX=9606 GN=MED4 PE=1 SV=1
Q96KR1	32	23	22		144030000	137350000	78564000	117012	Zinc finger RNA-binding protein OS=Homo sapiens OX=9606 GN=ZFR PE=1 SV=2
P11233	53	9	5		16278000	49875000	46894000	23567	Ras-related protein Ral-A OS=Homo sapiens OX=9606 GN=RALA PE=1 SV=1
Q9NVA2	27	10	6	Acetylation (Protein N-term)	68947000	61495000	46289000	49398	Septin-11 OS=Homo sapiens OX=9606 GN=SEPTIN11 PE=1 SV=3
Q15427	25	10	10	Oxidation (M); Acetylation (Protein N-term)	25324000	74530000	69790000	44386	Splicing factor 3B subunit 4 OS=Homo sapiens OX=9606 GN=SF3B4 PE=1 SV=1
Q15007	13	4	4	Oxidation (M)	5837300	9335200	7134600	44244	Pre-mRNA-splicing regulator WTAP OS=Homo sapiens OX=9606 GN=WTAP PE=1 SV=2
P35637	21	13	10	Oxidation (M)	458040000	303890000	320770000	53426	RNA-binding protein FUS OS=Homo sapiens OX=9606 GN=FUS PE=1 SV=1
Q7L0Y3	24	6	6		14407000	27412000	22272000	47347	tRNA methyltransferase 10 homolog C OS=Homo sapiens OX=9606 GN=TRMT10C PE=1 SV=2
Q8N0X7	12	5	5	Acetylation (Protein N-term)	6292600	17665000	20688000	72833	Spartin OS=Homo sapiens OX=9606 GN=SPART PE=1 SV=1
Q9Y2Q3	51	8	8		21749000	29479000	22842000	25497	Glutathione S-transferase kappa 1 OS=Homo sapiens OX=9606 GN=GSTK1 PE=1 SV=3
Q9P2B2	14	10	10		26302000	62333000	43796000	98556	Prostaglandin F2 receptor negative regulator OS=Homo sapiens OX=9606 GN=PTGFRN PE=1 SV=2
A0AVT1	4	3	3		3592100	10035000	4526500	117970	Ubiquitin-like modifier-activating enzyme 6 OS=Homo sapiens OX=9606 GN=UBA6 PE=1 SV=1
P63104	76	28	15	Oxidation (M); Acetylation (Protein N-term)	1315400000	2186700000	1959600000	27745	14-3-3 protein zeta/delta OS=Homo sapiens OX=9606 GN=YWHAZ PE=1 SV=1
P30085	58	10	10		64679000	116740000	101180000	22222	UMP-CMP kinase OS=Homo sapiens OX=9606 GN=CMPK1 PE=1 SV=3
P26599	75	34	30	Oxidation (M); Acetylation (Protein N-term)	623120000	678540000	613030000	57221	Polypyrimidine tract-binding protein 1 OS=Homo sapiens OX=9606 GN=PTBP1 PE=1 SV=1
Q12788	31	16	16	Acetylation (Protein N-term)	45633000	133190000	66599000	89035	Transducin beta-like protein 3 OS=Homo sapiens OX=9606 GN=TBL3 PE=1 SV=2
Q9NZM1	42	81	80		412390000	598180000	654150000	234706	Myoferlin OS=Homo sapiens OX=9606 GN=MYOF PE=1 SV=1
Q9NX55	25	2	2		13991000	3891500	7909700	14665	Huntingtin-interacting protein K OS=Homo sapiens OX=9606 GN=HYPK PE=1 SV=2
Q9NQG5	42	8	6		13571000	23794000	32905000	36900	Regulation of nuclear pre-mRNA domain-containing protein 1B OS=Homo sapiens OX=9606 GN=RPRD1B PE=1 SV=1
Q99714	72	13	13	Oxidation (M)	93685000	129270000	84441000	26923	3-hydroxyacyl-CoA dehydrogenase type-2 OS=Homo sapiens OX=9606 GN=HSD17B10 PE=1 SV=3
P47985	45	9	8		57534000	108850000	152790000	29668	Cytochrome b-c1 complex subunit Rieske mitochondrial OS=Homo sapiens OX=9606 GN=UQCRFS1 PE=1 SV=2
P30740	9	2	2		1082300	5287200	6739800	42742	Leukocyte elastase inhibitor OS=Homo sapiens OX=9606 GN=SERPINB1 PE=1 SV=1
P48449	10	5	5		14676000	32580000	40850000	83309	Lanosterol synthase OS=Homo sapiens OX=9606 GN=LSS PE=1 SV=1
Q14019	37	7	7		67533000	175360000	140440000	15945	Coactosin-like protein OS=Homo sapiens OX=9606 GN=COTL1 PE=1 SV=3
P07203	16	2	2		1868400	8815500	10631000	22088	Glutathione peroxidase 1 OS=Homo sapiens OX=9606 GN=GPX1 PE=1 SV=4
P13984	29	4	4		5339000	19648000	24066000	28380	General transcription factor IIF subunit 2 OS=Homo sapiens OX=9606 GN=GTF2F2 PE=1 SV=2
Q9Y450	19	7	7		9821000	19272000	16459000	75473	HBS1-like protein OS=Homo sapiens OX=9606 GN=HBS1L PE=1 SV=1
Q9Y6D9	6	3	3	Acetylation (Protein N-term)	2100800	1910200	4475900	83067	Mitotic spindle assembly checkpoint protein MAD1 OS=Homo sapiens OX=9606 GN=MAD1L1 PE=1 SV=2
Q9HCC0	15	5	5		3798600	6077300	12191000	61333	Methylcrotonoyl-CoA carboxylase beta chain mitochondrial OS=Homo sapiens OX=9606 GN=MCCC2 PE=1 SV=1
P49006	32	3	3		17050000	44792000	43013000	19529	MARCKS-related protein OS=Homo sapiens OX=9606 GN=MARCKSL1 PE=1 SV=2
Q08378	5	5	5		5755400	8719600	8928500	167354	Golgin subfamily A member 3 OS=Homo sapiens OX=9606 GN=GOLGA3 PE=1 SV=2
P04150	7	4	4		9339900	8697200	6853500	85659	Glucocorticoid receptor OS=Homo sapiens OX=9606 GN=NR3C1 PE=1 SV=1
Q9Y5K6	4	2	2		1065500	4392400	5815200	71451	CD2-associated protein OS=Homo sapiens OX=9606 GN=CD2AP PE=1 SV=1
Q14573	8	13	13		11181000	22149000	32856000	304105	Inositol 1 4 5-trisphosphate receptor type 3 OS=Homo sapiens OX=9606 GN=ITPR3 PE=1 SV=2
Q6RFH5	49	12	12		55116000	22748000	22890000	42441	WD repeat-containing protein 74 OS=Homo sapiens OX=9606 GN=WDR74 PE=1 SV=1
P54578	37	18	18		116700000	581730000	158370000	56069	Ubiquitin carboxyl-terminal hydrolase 14 OS=Homo sapiens OX=9606 GN=USP14 PE=1 SV=3
Q16851	32	13	13	Acetylation (Protein N-term)	64951000	105600000	83627000	56940	UTP--glucose-1-phosphate uridylyltransferase OS=Homo sapiens OX=9606 GN=UGP2 PE=1 SV=5
Q96CX2	19	5	5		34694000	13889000	10851000	35701	BTB/POZ domain-containing protein KCTD12 OS=Homo sapiens OX=9606 GN=KCTD12 PE=1 SV=1
P83881	30	5	5		112060000	230430000	137620000	12441	60S ribosomal protein L36a OS=Homo sapiens OX=9606 GN=RPL36A PE=1 SV=2
P49366	12	3	3		2598500	5844700	6063100	40971	Deoxyhypusine synthase OS=Homo sapiens OX=9606 GN=DHPS PE=1 SV=1
P62807	63	25	4	Oxidation (M)	1714600000	1696500000	1501600000	13906	Histone H2B type 1-C/E/F/G/I OS=Homo sapiens OX=9606 GN=H2BC4 PE=1 SV=4
Q99877	63	25	4	Oxidation (M)	1714600000	1696500000	1501600000	13922	Histone H2B type 1-N OS=Homo sapiens OX=9606 GN=H2BC15 PE=1 SV=3
Q99879	63	25	4	Oxidation (M)	1714600000	1696500000	1501600000	13989	Histone H2B type 1-M OS=Homo sapiens OX=9606 GN=H2BC14 PE=1 SV=3
Q5QNW6	63	25	4	Oxidation (M)	1714600000	1696500000	1501600000	13920	Histone H2B type 2-F OS=Homo sapiens OX=9606 GN=H2BC18 PE=1 SV=3
Q93079	63	25	4	Oxidation (M)	1714600000	1696500000	1501600000	13892	Histone H2B type 1-H OS=Homo sapiens OX=9606 GN=H2BC9 PE=1 SV=3
P58876	63	25	4	Oxidation (M)	1714600000	1696500000	1501600000	13936	Histone H2B type 1-D OS=Homo sapiens OX=9606 GN=H2BC5 PE=1 SV=2
Q9NVP2	24	3	3		11500000	19489000	9036000	22434	Histone chaperone ASF1B OS=Homo sapiens OX=9606 GN=ASF1B PE=1 SV=1
P49792	28	67	48		228580000	476130000	471480000	358201	E3 SUMO-protein ligase RanBP2 OS=Homo sapiens OX=9606 GN=RANBP2 PE=1 SV=2
Q13459	4	5	4		1560400	37155000	2562400	243398	Unconventional myosin-IXb OS=Homo sapiens OX=9606 GN=MYO9B PE=1 SV=3
Q6PGP7	7	8	8		19269000	7021100	11934000	175485	Tetratricopeptide repeat protein 37 OS=Homo sapiens OX=9606 GN=TTC37 PE=1 SV=1
Q15075	13	15	15		35940000	32146000	145850000	162465	Early endosome antigen 1 OS=Homo sapiens OX=9606 GN=EEA1 PE=1 SV=2
Q9H4M9	38	15	11	Oxidation (M)	29201000	65018000	74686000	60627	EH domain-containing protein 1 OS=Homo sapiens OX=9606 GN=EHD1 PE=1 SV=2
O43242	51	24	24		234730000	280000000	274420000	60978	26S proteasome non-ATPase regulatory subunit 3 OS=Homo sapiens OX=9606 GN=PSMD3 PE=1 SV=2
Q53F19	4	2	2		2221700	35106000	15338000	70593	Nuclear cap-binding protein subunit 3 OS=Homo sapiens OX=9606 GN=NCBP3 PE=1 SV=2
Q9Y6B6	41	9	4		22754000	22863000	13266000	22410	GTP-binding protein SAR1b OS=Homo sapiens OX=9606 GN=SAR1B PE=1 SV=1
P28062	13	3	2		15694000	24763000	28562000	30354	Proteasome subunit beta type-8 OS=Homo sapiens OX=9606 GN=PSMB8 PE=1 SV=3
Q96IR7	29	7	7		12828000	41606000	29252000	39386	4-hydroxyphenylpyruvate dioxygenase-like protein OS=Homo sapiens OX=9606 GN=HPDL PE=1 SV=1
Q7Z3K3	19	15	15		11859000	21920000	14283000	155343	Pogo transposable element with ZNF domain OS=Homo sapiens OX=9606 GN=POGZ PE=1 SV=2
Q5T6V5	13	4	4	Acetylation (Protein N-term)	11937000	20635000	15295000	39029	Queuosine salvage protein OS=Homo sapiens OX=9606 GN=C9orf64 PE=1 SV=1
P11310	40	13	13	Carbamidomethylation; Oxidation (M)	414310000	241340000	240350000	46588	Medium-chain specific acyl-CoA dehydrogenase mitochondrial OS=Homo sapiens OX=9606 GN=ACADM PE=1 SV=1
P19338	60	66	65	Oxidation (M)	2486600000	2427000000	2440100000	76615	Nucleolin OS=Homo sapiens OX=9606 GN=NCL PE=1 SV=3
Q6IN85	3	2	2		426910	2469900	1819500	95368	Serine/threonine-protein phosphatase 4 regulatory subunit 3A OS=Homo sapiens OX=9606 GN=PPP4R3A PE=1 SV=1
Q96JM3	12	7	7	Acetylation (Protein N-term)	9482500	22429000	37358000	89099	Chromosome alignment-maintaining phosphoprotein 1 OS=Homo sapiens OX=9606 GN=CHAMP1 PE=1 SV=2
E9PRG8	21	2	2		12885000	31152000	165680000	14234	Uncharacterized protein C11orf98 OS=Homo sapiens OX=9606 GN=C11orf98 PE=4 SV=2
P13797	48	33	29	Oxidation (M); Acetylation (Protein N-term)	545420000	567950000	750860000	70811	Plastin-3 OS=Homo sapiens OX=9606 GN=PLS3 PE=1 SV=4
P61313	50	22	22		611000000	1086600000	845090000	24146	60S ribosomal protein L15 OS=Homo sapiens OX=9606 GN=RPL15 PE=1 SV=2
O75915	25	5	5	Acetylation (Protein N-term)	40944000	56951000	45395000	21615	PRA1 family protein 3 OS=Homo sapiens OX=9606 GN=ARL6IP5 PE=1 SV=1
P32004	28	34	34		1681700000	361730000	351220000	140003	Neural cell adhesion molecule L1 OS=Homo sapiens OX=9606 GN=L1CAM PE=1 SV=2
P27694	50	25	24	Acetylation (Protein N-term)	238650000	322930000	401310000	68138	Replication protein A 70 kDa DNA-binding subunit OS=Homo sapiens OX=9606 GN=RPA1 PE=1 SV=2
Q86TU7	14	7	7		11834000	9887900	10711000	67257	Actin-histidine N-methyltransferase OS=Homo sapiens OX=9606 GN=SETD3 PE=1 SV=1
Q13098	21	7	7		29677000	30799000	27699000	55537	COP9 signalosome complex subunit 1 OS=Homo sapiens OX=9606 GN=GPS1 PE=1 SV=4
Q9Y224	62	15	15		65092000	74111000	78115000	28068	RNA transcription translation and transport factor protein OS=Homo sapiens OX=9606 GN=RTRAF PE=1 SV=1
Q9UNH7	16	7	6	Acetylation (Protein N-term)	278550000	23423000	18556000	46649	Sorting nexin-6 OS=Homo sapiens OX=9606 GN=SNX6 PE=1 SV=1
Q15286	25	6	4		16996000	28685000	22231000	23025	Ras-related protein Rab-35 OS=Homo sapiens OX=9606 GN=RAB35 PE=1 SV=1
O43819	27	5	5		27119000	19586000	15496000	29810	Protein SCO2 homolog mitochondrial OS=Homo sapiens OX=9606 GN=SCO2 PE=1 SV=3
Q9HAV7	52	10	10		71404000	58394000	90416000	24279	GrpE protein homolog 1 mitochondrial OS=Homo sapiens OX=9606 GN=GRPEL1 PE=1 SV=2
Q9UI10	33	11	11		24733000	31310000	28364000	57557	Translation initiation factor eIF-2B subunit delta OS=Homo sapiens OX=9606 GN=EIF2B4 PE=1 SV=2
Q9H8H2	15	9	9		5842100	3398700	5401900	94087	Probable ATP-dependent RNA helicase DDX31 OS=Homo sapiens OX=9606 GN=DDX31 PE=1 SV=2
Q15397	38	22	22		81627000	136410000	131240000	73584	Pumilio homolog 3 OS=Homo sapiens OX=9606 GN=PUM3 PE=1 SV=3
Q96EY5	15	2	2	Acetylation (Protein N-term)	1373800	21147000	29167000	28783	Multivesicular body subunit 12A OS=Homo sapiens OX=9606 GN=MVB12A PE=1 SV=1
P42677	32	7	3		131820000	205550000	130810000	9461	40S ribosomal protein S27 OS=Homo sapiens OX=9606 GN=RPS27 PE=1 SV=3
P62136	39	16	6	Acetylation (Protein N-term)	44085000	91048000	74682000	37512	Serine/threonine-protein phosphatase PP1-alpha catalytic subunit OS=Homo sapiens OX=9606 GN=PPP1CA PE=1 SV=1
Q9NRF8	18	6	4		4203100	8636600	13464000	65678	CTP synthase 2 OS=Homo sapiens OX=9606 GN=CTPS2 PE=1 SV=1
Q9UHA4	31	2	2		4302700	4259400	2215700	13623	Ragulator complex protein LAMTOR3 OS=Homo sapiens OX=9606 GN=LAMTOR3 PE=1 SV=1
P67936	61	25	9	Acetylation (Protein N-term)	318400000	513880000	411180000	28522	Tropomyosin alpha-4 chain OS=Homo sapiens OX=9606 GN=TPM4 PE=1 SV=3
Q5GLZ8	4	3	3		4638600	3043000	3651300	118563	Probable E3 ubiquitin-protein ligase HERC4 OS=Homo sapiens OX=9606 GN=HERC4 PE=1 SV=1
O95433	51	14	14		88087000	249000000	97959000	38274	Activator of 90 kDa heat shock protein ATPase homolog 1 OS=Homo sapiens OX=9606 GN=AHSA1 PE=1 SV=1
P33897	16	8	8		11084000	20277000	22431000	82937	ATP-binding cassette sub-family D member 1 OS=Homo sapiens OX=9606 GN=ABCD1 PE=1 SV=2
P00505	46	23	23		358270000	209560000	203430000	47518	Aspartate aminotransferase mitochondrial OS=Homo sapiens OX=9606 GN=GOT2 PE=1 SV=3
Q15046	44	26	26	Acetylation (Protein N-term)	261220000	288470000	313070000	68048	Lysine--tRNA ligase OS=Homo sapiens OX=9606 GN=KARS1 PE=1 SV=3
Q14690	31	43	43		136630000	291390000	299160000	208699	Protein RRP5 homolog OS=Homo sapiens OX=9606 GN=PDCD11 PE=1 SV=3
P62191	48	21	21		132640000	151050000	180830000	49185	26S proteasome regulatory subunit 4 OS=Homo sapiens OX=9606 GN=PSMC1 PE=1 SV=1
Q15645	35	12	12	Acetylation (Protein N-term)	118610000	128170000	131570000	48551	Pachytene checkpoint protein 2 homolog OS=Homo sapiens OX=9606 GN=TRIP13 PE=1 SV=2
P12004	55	16	16	Oxidation (M)	401010000	532190000	539580000	28769	Proliferating cell nuclear antigen OS=Homo sapiens OX=9606 GN=PCNA PE=1 SV=1
Q5JWF2	15	13	11		49229000	165790000	157170000	111024	Guanine nucleotide-binding protein G(s) subunit alpha isoforms XLas OS=Homo sapiens OX=9606 GN=GNAS PE=1 SV=2
P63092	39	13	11		49229000	165790000	157170000	45665	Guanine nucleotide-binding protein G(s) subunit alpha isoforms short OS=Homo sapiens OX=9606 GN=GNAS PE=1 SV=1
Q15436	37	22	20	Oxidation (M); Acetylation (Protein N-term)	96871000	125200000	120550000	86161	Protein transport protein Sec23A OS=Homo sapiens OX=9606 GN=SEC23A PE=1 SV=2
Q03468	4	4	4		6052100	10093000	7563600	168415	DNA excision repair protein ERCC-6 OS=Homo sapiens OX=9606 GN=ERCC6 PE=1 SV=1
P60660	56	9	8	Oxidation (M)	483990000	605230000	567580000	16930	Myosin light polypeptide 6 OS=Homo sapiens OX=9606 GN=MYL6 PE=1 SV=2
O95391	14	4	4	Acetylation (Protein N-term)	3817500	6712500	69761000	68387	Pre-mRNA-splicing factor SLU7 OS=Homo sapiens OX=9606 GN=SLU7 PE=1 SV=2
P04844	52	27	27		100880000	153770000	136530000	69284	Dolichyl-diphosphooligosaccharide--protein glycosyltransferase subunit 2 OS=Homo sapiens OX=9606 GN=RPN2 PE=1 SV=3
Q99613	34	27	27		217300000	372670000	299270000	105344	Eukaryotic translation initiation factor 3 subunit C OS=Homo sapiens OX=9606 GN=EIF3C PE=1 SV=1
Q12830	2	3	3		29573000	47025000	38153000	338262	Nucleosome-remodeling factor subunit BPTF OS=Homo sapiens OX=9606 GN=BPTF PE=1 SV=3
O94874	33	22	22		97112000	123900000	97551000	89595	E3 UFM1-protein ligase 1 OS=Homo sapiens OX=9606 GN=UFL1 PE=1 SV=2
P04040	46	17	17	Acetylation (Protein N-term)	45420000	78875000	88339000	59756	Catalase OS=Homo sapiens OX=9606 GN=CAT PE=1 SV=3
P61221	31	16	16		147370000	276010000	256110000	67314	ATP-binding cassette sub-family E member 1 OS=Homo sapiens OX=9606 GN=ABCE1 PE=1 SV=1
P78318	37	11	10	Acetylation (Protein N-term)	14574000	36220000	34728000	39222	Immunoglobulin-binding protein 1 OS=Homo sapiens OX=9606 GN=IGBP1 PE=1 SV=1
Q9H0D6	26	18	18		83461000	606350000	82330000	108583	5'-3' exoribonuclease 2 OS=Homo sapiens OX=9606 GN=XRN2 PE=1 SV=1
O60930	19	4	4		3230000	16489000	20730000	32064	Ribonuclease H1 OS=Homo sapiens OX=9606 GN=RNASEH1 PE=1 SV=2
Q9HD15	14	3	3	Acetylation (Protein N-term)	7335900	12308000	10298000	25673	Steroid receptor RNA activator 1 OS=Homo sapiens OX=9606 GN=SRA1 PE=1 SV=1
Q06787	22	10	8		14635000	41635000	36402000	71175	Synaptic functional regulator FMR1 OS=Homo sapiens OX=9606 GN=FMR1 PE=1 SV=1
P60709	85	134	33	Carbamidomethylation; Oxidation (M); Acetylation (Protein N-term)	19580000000	23635000000	26679000000	41737	Actin cytoplasmic 1 OS=Homo sapiens OX=9606 GN=ACTB PE=1 SV=1
P35232	76	23	23		685390000	529940000	821820000	29804	Prohibitin OS=Homo sapiens OX=9606 GN=PHB PE=1 SV=1
Q8WW12	36	5	5		52896000	100090000	66004000	18925	PEST proteolytic signal-containing nuclear protein OS=Homo sapiens OX=9606 GN=PCNP PE=1 SV=2
O60832	42	18	18	Acetylation (Protein N-term)	113360000	115030000	129070000	57674	H/ACA ribonucleoprotein complex subunit DKC1 OS=Homo sapiens OX=9606 GN=DKC1 PE=1 SV=3
Q9NZ63	15	3	3		9265500	15258000	13589000	33688	Telomere length and silencing protein 1 homolog OS=Homo sapiens OX=9606 GN=C9orf78 PE=1 SV=1
Q9UL15	6	2	2		437520	17434000	10014000	51200	BAG family molecular chaperone regulator 5 OS=Homo sapiens OX=9606 GN=BAG5 PE=1 SV=1
Q9NY27	30	8	8		13449000	22188000	33749000	46898	Serine/threonine-protein phosphatase 4 regulatory subunit 2 OS=Homo sapiens OX=9606 GN=PPP4R2 PE=1 SV=3
Q99700	8	6	6		281200000	634140000	300950000	140283	Ataxin-2 OS=Homo sapiens OX=9606 GN=ATXN2 PE=1 SV=2
O95336	48	9	9		42480000	74029000	71604000	27547	6-phosphogluconolactonase OS=Homo sapiens OX=9606 GN=PGLS PE=1 SV=2
P52306	7	3	3	Oxidation (M)	2919200	13597000	6488600	66317	Rap1 GTPase-GDP dissociation stimulator 1 OS=Homo sapiens OX=9606 GN=RAP1GDS1 PE=1 SV=3
Q02878	57	38	38	Acetylation (Protein N-term)	959200000	1755600000	1459700000	32728	60S ribosomal protein L6 OS=Homo sapiens OX=9606 GN=RPL6 PE=1 SV=3
P43686	51	21	21	Acetylation (Protein N-term)	89496000	154840000	127170000	47366	26S proteasome regulatory subunit 6B OS=Homo sapiens OX=9606 GN=PSMC4 PE=1 SV=2
Q9Y2T7	28	7	3		14865000	1407100	1365000	38518	Y-box-binding protein 2 OS=Homo sapiens OX=9606 GN=YBX2 PE=1 SV=2
O75323	20	4	4		7986500	5806000	4610000	33743	Protein NipSnap homolog 2 OS=Homo sapiens OX=9606 GN=NIPSNAP2 PE=1 SV=1
P35270	34	6	6		6927900	16443000	19374000	28048	Sepiapterin reductase OS=Homo sapiens OX=9606 GN=SPR PE=1 SV=1
P04792	91	40	40	Oxidation (M)	1611100000	1220300000	1129200000	22783	Heat shock protein beta-1 OS=Homo sapiens OX=9606 GN=HSPB1 PE=1 SV=2
Q86TG7	8	4	4		22486000	77341000	13292000	80173	Retrotransposon-derived protein PEG10 OS=Homo sapiens OX=9606 GN=PEG10 PE=1 SV=2
P45880	32	9	9		350890000	339470000	220610000	31567	Voltage-dependent anion-selective channel protein 2 OS=Homo sapiens OX=9606 GN=VDAC2 PE=1 SV=2
O75530	5	2	2		9507100	1714700	1887900	50198	Polycomb protein EED OS=Homo sapiens OX=9606 GN=EED PE=1 SV=2
Q8NFH5	53	11	11	Acetylation (Protein N-term)	44386000	31820000	24425000	34774	Nucleoporin NUP35 OS=Homo sapiens OX=9606 GN=NUP35 PE=1 SV=1
Q16186	11	3	3	Acetylation (Protein N-term)	25157000	67851000	49898000	42153	Proteasomal ubiquitin receptor ADRM1 OS=Homo sapiens OX=9606 GN=ADRM1 PE=1 SV=2
P41252	35	37	36	Oxidation (M); Acetylation (Protein N-term)	325680000	367360000	384850000	144498	Isoleucine--tRNA ligase cytoplasmic OS=Homo sapiens OX=9606 GN=IARS1 PE=1 SV=2
Q15257	27	6	6		41918000	52078000	31286000	40668	Serine/threonine-protein phosphatase 2A activator OS=Homo sapiens OX=9606 GN=PTPA PE=1 SV=3
O60493	33	6	5	Acetylation (Protein N-term)	21768000	32708000	29011000	18762	Sorting nexin-3 OS=Homo sapiens OX=9606 GN=SNX3 PE=1 SV=3
P41250	41	25	25		190070000	309860000	247780000	83166	Glycine--tRNA ligase OS=Homo sapiens OX=9606 GN=GARS1 PE=1 SV=3
Q15393	32	34	34		323730000	485480000	406460000	135577	Splicing factor 3B subunit 3 OS=Homo sapiens OX=9606 GN=SF3B3 PE=1 SV=4
Q96R06	4	3	3		1997000	4650300	3403300	134422	Sperm-associated antigen 5 OS=Homo sapiens OX=9606 GN=SPAG5 PE=1 SV=2
Q9C0C2	21	21	21		33384000	73991000	56139000	181795	182 kDa tankyrase-1-binding protein OS=Homo sapiens OX=9606 GN=TNKS1BP1 PE=1 SV=4
Q6ZXV5	12	7	7		6544200	4791700	11770000	104009	Protein O-mannosyl-transferase TMTC3 OS=Homo sapiens OX=9606 GN=TMTC3 PE=1 SV=2
P38606	43	20	20		101080000	169200000	189450000	68304	V-type proton ATPase catalytic subunit A OS=Homo sapiens OX=9606 GN=ATP6V1A PE=1 SV=2
P30626	63	9	9	Acetylation (Protein N-term)	174350000	127290000	122190000	21676	Sorcin OS=Homo sapiens OX=9606 GN=SRI PE=1 SV=1
Q9HCN4	16	4	4	Acetylation (Protein N-term)	9303900	13981000	16458000	41740	GPN-loop GTPase 1 OS=Homo sapiens OX=9606 GN=GPN1 PE=1 SV=1
Q5JRA6	7	8	8		430790000	24371000	24918000	213700	Transport and Golgi organization protein 1 homolog OS=Homo sapiens OX=9606 GN=MIA3 PE=1 SV=1
P62280	34	10	10		450370000	715960000	515270000	18431	40S ribosomal protein S11 OS=Homo sapiens OX=9606 GN=RPS11 PE=1 SV=3
Q9NT62	20	6	6	Acetylation (Protein N-term)	25660000	22989000	32737000	35864	Ubiquitin-like-conjugating enzyme ATG3 OS=Homo sapiens OX=9606 GN=ATG3 PE=1 SV=1
Q9P289	29	10	5	Oxidation (M); Acetylation (Protein N-term)	22843000	57716000	51804000	46529	Serine/threonine-protein kinase 26 OS=Homo sapiens OX=9606 GN=STK26 PE=1 SV=2
O14602	38	9	9		103370000	172240000	180940000	16442	Eukaryotic translation initiation factor 1A Y-chromosomal OS=Homo sapiens OX=9606 GN=EIF1AY PE=1 SV=4
P47813	38	9	9		103370000	172240000	180940000	16460	Eukaryotic translation initiation factor 1A X-chromosomal OS=Homo sapiens OX=9606 GN=EIF1AX PE=1 SV=2
P54727	42	14	11		188320000	255120000	255250000	43171	UV excision repair protein RAD23 homolog B OS=Homo sapiens OX=9606 GN=RAD23B PE=1 SV=1
Q9NVX2	25	7	7		6958200	18756000	16617000	53320	Notchless protein homolog 1 OS=Homo sapiens OX=9606 GN=NLE1 PE=1 SV=4
Q92882	23	3	3		12307000	5405200	10087000	23787	Osteoclast-stimulating factor 1 OS=Homo sapiens OX=9606 GN=OSTF1 PE=1 SV=2
Q6NUK1	47	20	20		105270000	137550000	119340000	53354	Calcium-binding mitochondrial carrier protein SCaMC-1 OS=Homo sapiens OX=9606 GN=SLC25A24 PE=1 SV=2
Q9P2B4	6	2	2		816420	1317600	4707100	70158	CTTNBP2 N-terminal-like protein OS=Homo sapiens OX=9606 GN=CTTNBP2NL PE=1 SV=2
Q8NBQ5	13	3	3		1676400	2637700	2511100	32936	Estradiol 17-beta-dehydrogenase 11 OS=Homo sapiens OX=9606 GN=HSD17B11 PE=1 SV=3
Q9C0E2	4	3	3	Acetylation (Protein N-term)	1236100	954430	1669600	130139	Exportin-4 OS=Homo sapiens OX=9606 GN=XPO4 PE=1 SV=2
P22314	54	59	59		1047100000	1442600000	1603000000	117849	Ubiquitin-like modifier-activating enzyme 1 OS=Homo sapiens OX=9606 GN=UBA1 PE=1 SV=3
Q07157	13	14	14		30200000	49778000	33239000	195457	Tight junction protein ZO-1 OS=Homo sapiens OX=9606 GN=TJP1 PE=1 SV=3
P55795	39	15	9	Acetylation (Protein N-term)	35902000	66204000	66865000	49264	Heterogeneous nuclear ribonucleoprotein H2 OS=Homo sapiens OX=9606 GN=HNRNPH2 PE=1 SV=1
O94979	23	20	20		54976000	100860000	91477000	133015	Protein transport protein Sec31A OS=Homo sapiens OX=9606 GN=SEC31A PE=1 SV=3
Q9BRJ7	20	3	2		1416300	603260	2156200	23338	Tudor-interacting repair regulator protein OS=Homo sapiens OX=9606 GN=NUDT16L1 PE=1 SV=1
Q9UMX5	45	6	6		19614000	67002000	69559000	18856	Neudesin OS=Homo sapiens OX=9606 GN=NENF PE=1 SV=1
Q9BV38	29	10	10		93435000	109240000	67465000	47405	WD repeat-containing protein 18 OS=Homo sapiens OX=9606 GN=WDR18 PE=1 SV=2
P35249	32	10	10		65995000	99805000	71856000	39682	Replication factor C subunit 4 OS=Homo sapiens OX=9606 GN=RFC4 PE=1 SV=2
O75150	11	7	7		14615000	20560000	31535000	113678	E3 ubiquitin-protein ligase BRE1B OS=Homo sapiens OX=9606 GN=RNF40 PE=1 SV=5
Q9UBW8	31	6	6		23118000	20008000	12814000	30277	COP9 signalosome complex subunit 7a OS=Homo sapiens OX=9606 GN=COPS7A PE=1 SV=1
P23025	9	1	1	Acetylation (Protein N-term)	4355100	1566200	7020500	31368	DNA repair protein complementing XP-A cells OS=Homo sapiens OX=9606 GN=XPA PE=1 SV=1
O75306	40	12	12		48468000	9599700	115620000	52546	NADH dehydrogenase [ubiquinone] iron-sulfur protein 2 mitochondrial OS=Homo sapiens OX=9606 GN=NDUFS2 PE=1 SV=2
Q8N128	17	2	2		6365100	57158000	46580000	23757	Protein FAM177A1 OS=Homo sapiens OX=9606 GN=FAM177A1 PE=1 SV=1
O75340	68	12	12	Acetylation (Protein N-term)	109760000	115720000	119910000	21868	Programmed cell death protein 6 OS=Homo sapiens OX=9606 GN=PDCD6 PE=1 SV=1
P49189	22	12	11	Acetylation (Protein N-term)	53394000	130450000	114590000	53802	4-trimethylaminobutyraldehyde dehydrogenase OS=Homo sapiens OX=9606 GN=ALDH9A1 PE=1 SV=3
P43490	47	17	17	Acetylation (Protein N-term)	96131000	76560000	100200000	55521	Nicotinamide phosphoribosyltransferase OS=Homo sapiens OX=9606 GN=NAMPT PE=1 SV=1
Q14166	36	17	17		125750000	125640000	110150000	74404	Tubulin--tyrosine ligase-like protein 12 OS=Homo sapiens OX=9606 GN=TTLL12 PE=1 SV=2
P05187	61	23	19	Oxidation (M)	113480000	603500000	586480000	57954	Alkaline phosphatase placental type OS=Homo sapiens OX=9606 GN=ALPP PE=1 SV=2
Q07021	42	13	13	Oxidation (M)	229010000	125210000	215910000	31362	Complement component 1 Q subcomponent-binding protein mitochondrial OS=Homo sapiens OX=9606 GN=C1QBP PE=1 SV=1
Q96HR9	16	3	3		13975000	46737000	33693000	23418	Receptor expression-enhancing protein 6 OS=Homo sapiens OX=9606 GN=REEP6 PE=1 SV=2
P17813	9	6	6		130690000	191450000	146350000	70578	Endoglin OS=Homo sapiens OX=9606 GN=ENG PE=1 SV=2
Q15287	20	4	4		45191000	47722000	50597000	34208	RNA-binding protein with serine-rich domain 1 OS=Homo sapiens OX=9606 GN=RNPS1 PE=1 SV=1
P04264	45	31	23		234270000	417400000	381800000	66039	Keratin type II cytoskeletal 1 OS=Homo sapiens OX=9606 GN=KRT1 PE=1 SV=6
Q86Y56	29	15	15	Acetylation (Protein N-term)	16302000	30460000	35644000	93521	Dynein axonemal assembly factor 5 OS=Homo sapiens OX=9606 GN=DNAAF5 PE=1 SV=4
Q8N163	47	27	27		102830000	172720000	153200000	102902	Cell cycle and apoptosis regulator protein 2 OS=Homo sapiens OX=9606 GN=CCAR2 PE=1 SV=2
Q9UHV9	40	6	6		88428000	141270000	131640000	16648	Prefoldin subunit 2 OS=Homo sapiens OX=9606 GN=PFDN2 PE=1 SV=1
Q6P158	11	9	8		7619600	12288000	18855000	155604	Putative ATP-dependent RNA helicase DHX57 OS=Homo sapiens OX=9606 GN=DHX57 PE=1 SV=2
O60264	52	56	52	Acetylation (Protein N-term)	258070000	430730000	334240000	121905	SWI/SNF-related matrix-associated actin-dependent regulator of chromatin subfamily A member 5 OS=Homo sapiens OX=9606 GN=SMARCA5 PE=1 SV=1
P23921	43	28	28		262520000	319500000	285980000	90070	Ribonucleoside-diphosphate reductase large subunit OS=Homo sapiens OX=9606 GN=RRM1 PE=1 SV=1
Q9NX40	20	4	4		46868000	529180000	39726000	27626	OCIA domain-containing protein 1 OS=Homo sapiens OX=9606 GN=OCIAD1 PE=1 SV=1
Q12789	2	3	3		1222500	528130	422480	238873	General transcription factor 3C polypeptide 1 OS=Homo sapiens OX=9606 GN=GTF3C1 PE=1 SV=4
P47712	18	9	9	Acetylation (Protein N-term)	55647000	24408000	76752000	85239	Cytosolic phospholipase A2 OS=Homo sapiens OX=9606 GN=PLA2G4A PE=1 SV=2
Q9H0U3	10	3	3		26139000	58890000	34914000	38037	Magnesium transporter protein 1 OS=Homo sapiens OX=9606 GN=MAGT1 PE=1 SV=1
Q13616	11	7	7		8641500	22829000	23526000	89678	Cullin-1 OS=Homo sapiens OX=9606 GN=CUL1 PE=1 SV=2
P62820	74	17	5	Oxidation (M); Acetylation (Protein N-term)	42892000	67184000	64067000	22678	Ras-related protein Rab-1A OS=Homo sapiens OX=9606 GN=RAB1A PE=1 SV=3
P09972	61	27	16	Oxidation (M)	158880000	388730000	399520000	39456	Fructose-bisphosphate aldolase C OS=Homo sapiens OX=9606 GN=ALDOC PE=1 SV=2
Q9Y5L0	16	10	10	Acetylation (Protein N-term)	11067000	12829000	14058000	104203	Transportin-3 OS=Homo sapiens OX=9606 GN=TNPO3 PE=1 SV=3
Q9Y4R8	7	4	4		3142800	9286000	6293300	91747	Telomere length regulation protein TEL2 homolog OS=Homo sapiens OX=9606 GN=TELO2 PE=1 SV=2
Q96AY3	19	9	9		29507000	53491000	63716000	64245	Peptidyl-prolyl cis-trans isomerase FKBP10 OS=Homo sapiens OX=9606 GN=FKBP10 PE=1 SV=1
Q9H061	22	4	4		2411900	3598700	4025200	21527	Transmembrane protein 126A OS=Homo sapiens OX=9606 GN=TMEM126A PE=1 SV=1
O60610	23	28	28		58068000	125140000	117680000	141347	Protein diaphanous homolog 1 OS=Homo sapiens OX=9606 GN=DIAPH1 PE=1 SV=2
Q5R3I4	15	5	5		5174500	15902000	15746000	52787	Tetratricopeptide repeat protein 38 OS=Homo sapiens OX=9606 GN=TTC38 PE=1 SV=1
Q04695	70	48	24	Oxidation (M)	1074200000	591340000	573640000	48106	Keratin type I cytoskeletal 17 OS=Homo sapiens OX=9606 GN=KRT17 PE=1 SV=2
P62861	20	6	6		180600000	300390000	218290000	6648	40S ribosomal protein S30 OS=Homo sapiens OX=9606 GN=FAU PE=1 SV=1
Q9UGI8	18	9	9		49759000	99137000	86656000	47996	Testin OS=Homo sapiens OX=9606 GN=TES PE=1 SV=1
Q9NRX2	32	5	5		4500300	4460700	4494600	20050	39S ribosomal protein L17 mitochondrial OS=Homo sapiens OX=9606 GN=MRPL17 PE=1 SV=1
Q8WYA6	15	8	8	Acetylation (Protein N-term)	16202000	12294000	33944000	65173	Beta-catenin-like protein 1 OS=Homo sapiens OX=9606 GN=CTNNBL1 PE=1 SV=1
Q9H7B4	6	2	2		8545800	25747000	13016000	49097	Histone-lysine N-methyltransferase SMYD3 OS=Homo sapiens OX=9606 GN=SMYD3 PE=1 SV=4
Q9NYL9	41	12	12		68987000	93232000	107880000	39595	Tropomodulin-3 OS=Homo sapiens OX=9606 GN=TMOD3 PE=1 SV=1
P08729	72	51	35	Oxidation (M); Acetylation (Protein N-term)	1309800000	4106500000	593050000	51386	Keratin type II cytoskeletal 7 OS=Homo sapiens OX=9606 GN=KRT7 PE=1 SV=5
P20645	26	6	6		30359000	23502000	19902000	30993	Cation-dependent mannose-6-phosphate receptor OS=Homo sapiens OX=9606 GN=M6PR PE=1 SV=1
Q9C0C9	6	4	4		2184600	9059800	4800900	141293	(E3-independent) E2 ubiquitin-conjugating enzyme OS=Homo sapiens OX=9606 GN=UBE2O PE=1 SV=3
Q8IXT5	4	3	3		3873400	4197300	1394000	118103	RNA-binding protein 12B OS=Homo sapiens OX=9606 GN=RBM12B PE=1 SV=2
O14737	56	7	7	Acetylation (Protein N-term)	115560000	128810000	132950000	14285	Programmed cell death protein 5 OS=Homo sapiens OX=9606 GN=PDCD5 PE=1 SV=3
Q15004	33	4	4		8398200	20664000	15616000	11986	PCNA-associated factor OS=Homo sapiens OX=9606 GN=PCLAF PE=1 SV=1
P10586	5	5	5		2224800	6153700	6713300	212877	Receptor-type tyrosine-protein phosphatase F OS=Homo sapiens OX=9606 GN=PTPRF PE=1 SV=2
Q14204	47	182	182	Oxidation (M); Acetylation (Protein N-term)	1069800000	1643600000	1549100000	532412	Cytoplasmic dynein 1 heavy chain 1 OS=Homo sapiens OX=9606 GN=DYNC1H1 PE=1 SV=5
Q9UNF1	38	13	13	Acetylation (Protein N-term)	53100000	97775000	98115000	64954	Melanoma-associated antigen D2 OS=Homo sapiens OX=9606 GN=MAGED2 PE=1 SV=2
P07195	50	25	24	Oxidation (M)	2247500000	851880000	800860000	36639	L-lactate dehydrogenase B chain OS=Homo sapiens OX=9606 GN=LDHB PE=1 SV=2
P07686	11	5	4		4633100	407410000	456920000	63111	Beta-hexosaminidase subunit beta OS=Homo sapiens OX=9606 GN=HEXB PE=1 SV=3
O00469	18	10	10		21648000	48712000	40521000	84686	Procollagen-lysine 2-oxoglutarate 5-dioxygenase 2 OS=Homo sapiens OX=9606 GN=PLOD2 PE=1 SV=2
O95202	33	17	17		171200000	129320000	183840000	83354	Mitochondrial proton/calcium exchanger protein OS=Homo sapiens OX=9606 GN=LETM1 PE=1 SV=1
P11142	66	78	39	Carbamidomethylation; Oxidation (M)	3399100000	8398600000	7210800000	70898	Heat shock cognate 71 kDa protein OS=Homo sapiens OX=9606 GN=HSPA8 PE=1 SV=1
Q9NQZ2	30	11	11		39148000	69873000	95916000	54558	Something about silencing protein 10 OS=Homo sapiens OX=9606 GN=UTP3 PE=1 SV=1
O00762	28	3	3	Acetylation (Protein N-term)	19557000	229670000	22505000	19652	Ubiquitin-conjugating enzyme E2 C OS=Homo sapiens OX=9606 GN=UBE2C PE=1 SV=1
Q8NEZ5	11	3	3		3334500	3238400	4343500	44508	F-box only protein 22 OS=Homo sapiens OX=9606 GN=FBXO22 PE=1 SV=1
Q9BPX5	46	3	3		12374000	10288000	46141000	16941	Actin-related protein 2/3 complex subunit 5-like protein OS=Homo sapiens OX=9606 GN=ARPC5L PE=1 SV=1
Q9Y3D9	25	4	4		69153000	25272000	28381000	21771	28S ribosomal protein S23 mitochondrial OS=Homo sapiens OX=9606 GN=MRPS23 PE=1 SV=2
P35251	11	11	11	Oxidation (M)	948910000	31804000	22121000	128254	Replication factor C subunit 1 OS=Homo sapiens OX=9606 GN=RFC1 PE=1 SV=4
P84095	34	4	4		6528700	3903200	3269700	21308	Rho-related GTP-binding protein RhoG OS=Homo sapiens OX=9606 GN=RHOG PE=1 SV=1
O00148	42	25	8	Acetylation (Protein N-term)	19770000	20270000	29873000	49130	ATP-dependent RNA helicase DDX39A OS=Homo sapiens OX=9606 GN=DDX39A PE=1 SV=2
Q02978	42	10	10	Acetylation (Protein N-term)	151020000	51740000	222460000	34062	Mitochondrial 2-oxoglutarate/malate carrier protein OS=Homo sapiens OX=9606 GN=SLC25A11 PE=1 SV=3
P40692	6	4	4	Carbamidomethylation; Oxidation (M)	13481000	36204000	28287000	84601	DNA mismatch repair protein Mlh1 OS=Homo sapiens OX=9606 GN=MLH1 PE=1 SV=1
Q13535	2	4	4		829640	1529500	2123800	301365	Serine/threonine-protein kinase ATR OS=Homo sapiens OX=9606 GN=ATR PE=1 SV=3
O95983	17	4	4		20849000	617150	1781500	32844	Methyl-CpG-binding domain protein 3 OS=Homo sapiens OX=9606 GN=MBD3 PE=1 SV=1
Q13887	10	2	2		750960	1503800	3656500	50792	Krueppel-like factor 5 OS=Homo sapiens OX=9606 GN=KLF5 PE=1 SV=2
P15531	84	22	8	Carbamidomethylation; Oxidation (M)	423770000	282140000	289290000	17149	Nucleoside diphosphate kinase A OS=Homo sapiens OX=9606 GN=NME1 PE=1 SV=1
P16083	19	2	2		5395600	1359800	3161100	25919	Ribosyldihydronicotinamide dehydrogenase [quinone] OS=Homo sapiens OX=9606 GN=NQO2 PE=1 SV=5
P59998	35	6	6	Acetylation (Protein N-term)	111670000	108070000	91541000	19667	Actin-related protein 2/3 complex subunit 4 OS=Homo sapiens OX=9606 GN=ARPC4 PE=1 SV=3
Q99873	34	14	14		242640000	279110000	299180000	42462	Protein arginine N-methyltransferase 1 OS=Homo sapiens OX=9606 GN=PRMT1 PE=1 SV=3
Q96CS3	18	7	7	Acetylation (Protein N-term)	17557000	40125000	40964000	52624	FAS-associated factor 2 OS=Homo sapiens OX=9606 GN=FAF2 PE=1 SV=2
P30533	20	6	6		38407000	103510000	66082000	41466	Alpha-2-macroglobulin receptor-associated protein OS=Homo sapiens OX=9606 GN=LRPAP1 PE=1 SV=1
Q7L2H7	39	14	14	Oxidation (M); Acetylation (Protein N-term)	61815000	92234000	135350000	42503	Eukaryotic translation initiation factor 3 subunit M OS=Homo sapiens OX=9606 GN=EIF3M PE=1 SV=1
Q01518	51	23	22	Oxidation (M); Acetylation (Protein N-term)	355350000	263550000	289590000	51902	Adenylyl cyclase-associated protein 1 OS=Homo sapiens OX=9606 GN=CAP1 PE=1 SV=5
O95782	31	21	16		49221000	80762000	97685000	107546	AP-2 complex subunit alpha-1 OS=Homo sapiens OX=9606 GN=AP2A1 PE=1 SV=3
P05387	96	25	24	Oxidation (M)	959540000	663000000	816450000	11665	60S acidic ribosomal protein P2 OS=Homo sapiens OX=9606 GN=RPLP2 PE=1 SV=1
P62318	15	2	2		54937000	20123000	25817000	13916	Small nuclear ribonucleoprotein Sm D3 OS=Homo sapiens OX=9606 GN=SNRPD3 PE=1 SV=1
P27635	37	19	18	Oxidation (M)	477540000	592080000	587360000	24604	60S ribosomal protein L10 OS=Homo sapiens OX=9606 GN=RPL10 PE=1 SV=4
Q969X6	35	16	16		66779000	45612000	70053000	76890	U3 small nucleolar RNA-associated protein 4 homolog OS=Homo sapiens OX=9606 GN=UTP4 PE=1 SV=1
Q5J8M3	22	3	3		40376000	19366000	96923000	20087	ER membrane protein complex subunit 4 OS=Homo sapiens OX=9606 GN=EMC4 PE=1 SV=2
P11766	21	6	6		33278000	25242000	60127000	39724	Alcohol dehydrogenase class-3 OS=Homo sapiens OX=9606 GN=ADH5 PE=1 SV=4
Q9BXY0	23	6	6	Oxidation (M); Acetylation (Protein N-term)	20329000	18623000	72176000	35369	Protein MAK16 homolog OS=Homo sapiens OX=9606 GN=MAK16 PE=1 SV=2
Q9UQE7	41	45	45		210320000	368100000	291390000	141541	Structural maintenance of chromosomes protein 3 OS=Homo sapiens OX=9606 GN=SMC3 PE=1 SV=2
Q9NVI7	41	26	12		51336000	104730000	105100000	71369	ATPase family AAA domain-containing protein 3A OS=Homo sapiens OX=9606 GN=ATAD3A PE=1 SV=2
P07741	48	9	9	Acetylation (Protein N-term)	125530000	245800000	264250000	19608	Adenine phosphoribosyltransferase OS=Homo sapiens OX=9606 GN=APRT PE=1 SV=2
O75439	30	11	10		93883000	50981000	35941000	54366	Mitochondrial-processing peptidase subunit beta OS=Homo sapiens OX=9606 GN=PMPCB PE=1 SV=2
Q9UQ88	13	9	9		39914000	82886000	96980000	91362	Cyclin-dependent kinase 11A OS=Homo sapiens OX=9606 GN=CDK11A PE=1 SV=4
P21127	13	9	9		39914000	82886000	96980000	92620	Cyclin-dependent kinase 11B OS=Homo sapiens OX=9606 GN=CDK11B PE=1 SV=4
Q9NRG0	34	3	3		4281300	1323300	6341100	14711	Chromatin accessibility complex protein 1 OS=Homo sapiens OX=9606 GN=CHRAC1 PE=1 SV=1
O00571	60	48	43	Carbamidomethylation; Oxidation (M); Acetylation (Protein N-term)	585210000	742690000	969070000	73244	ATP-dependent RNA helicase DDX3X OS=Homo sapiens OX=9606 GN=DDX3X PE=1 SV=3
P14174	10	2	2	Oxidation (M)	646540000	97060000	110870000	12476	Macrophage migration inhibitory factor OS=Homo sapiens OX=9606 GN=MIF PE=1 SV=4
Q99961	19	7	7		49323000	64543000	60485000	41490	Endophilin-A2 OS=Homo sapiens OX=9606 GN=SH3GL1 PE=1 SV=1
O15160	35	9	9	Acetylation (Protein N-term)	38809000	82339000	70024000	39250	DNA-directed RNA polymerases I and III subunit RPAC1 OS=Homo sapiens OX=9606 GN=POLR1C PE=1 SV=1
Q99575	16	11	11		250820000	362200000	251650000	114709	Ribonucleases P/MRP protein subunit POP1 OS=Homo sapiens OX=9606 GN=POP1 PE=1 SV=2
Q9Y2B0	43	7	7		37206000	109160000	94793000	20652	Protein canopy homolog 2 OS=Homo sapiens OX=9606 GN=CNPY2 PE=1 SV=1
P61081	16	3	3		21977000	43842000	36720000	20900	NEDD8-conjugating enzyme Ubc12 OS=Homo sapiens OX=9606 GN=UBE2M PE=1 SV=1
P34949	5	2	2		1190600	1882900	6695700	46656	Mannose-6-phosphate isomerase OS=Homo sapiens OX=9606 GN=MPI PE=1 SV=2
Q9Y5X3	18	6	5	Acetylation (Protein N-term)	16149000	32648000	17965000	46817	Sorting nexin-5 OS=Homo sapiens OX=9606 GN=SNX5 PE=1 SV=1
Q14320	28	9	9		56017000	106470000	69613000	40242	Protein FAM50A OS=Homo sapiens OX=9606 GN=FAM50A PE=1 SV=2
Q9NV31	53	8	8		79106000	155620000	70783000	21850	U3 small nucleolar ribonucleoprotein protein IMP3 OS=Homo sapiens OX=9606 GN=IMP3 PE=1 SV=1
Q9BT22	12	5	5		9488700	14077000	26343000	52518	Chitobiosyldiphosphodolichol beta-mannosyltransferase OS=Homo sapiens OX=9606 GN=ALG1 PE=1 SV=2
O60936	44	4	4		7947900	19815000	25058000	22629	Nucleolar protein 3 OS=Homo sapiens OX=9606 GN=NOL3 PE=1 SV=2
P21283	11	3	3	Acetylation (Protein N-term)	1415200	3493600	5950800	43942	V-type proton ATPase subunit C 1 OS=Homo sapiens OX=9606 GN=ATP6V1C1 PE=1 SV=4
Q9UFC0	7	3	3		2086200	1364500	1785400	70861	Leucine-rich repeat and WD repeat-containing protein 1 OS=Homo sapiens OX=9606 GN=LRWD1 PE=1 SV=2
Q6P1J9	21	10	10		44128000	70866000	54351000	60577	Parafibromin OS=Homo sapiens OX=9606 GN=CDC73 PE=1 SV=1
O00487	33	7	7		33577000	91202000	81862000	34577	26S proteasome non-ATPase regulatory subunit 14 OS=Homo sapiens OX=9606 GN=PSMD14 PE=1 SV=1
Q9UNX4	33	26	26		126260000	113430000	131870000	106099	WD repeat-containing protein 3 OS=Homo sapiens OX=9606 GN=WDR3 PE=1 SV=1
P07948	22	7	6		23045000	37198000	50889000	58574	Tyrosine-protein kinase Lyn OS=Homo sapiens OX=9606 GN=LYN PE=1 SV=3
P62304	25	2	2		10220000	3284800	10354000	10804	Small nuclear ribonucleoprotein E OS=Homo sapiens OX=9606 GN=SNRPE PE=1 SV=1
Q13242	57	14	13	Acetylation (Protein N-term)	255840000	160610000	240900000	25542	Serine/arginine-rich splicing factor 9 OS=Homo sapiens OX=9606 GN=SRSF9 PE=1 SV=1
Q9P275	5	5	5		15757000	5005500	21182000	122908	Ubiquitin carboxyl-terminal hydrolase 36 OS=Homo sapiens OX=9606 GN=USP36 PE=1 SV=4
P50995	29	14	13	Carbamidomethylation	65075000	81805000	71117000	54390	Annexin A11 OS=Homo sapiens OX=9606 GN=ANXA11 PE=1 SV=1
P55060	41	40	40	Oxidation (M); Acetylation (Protein N-term)	407920000	742310000	723900000	110417	Exportin-2 OS=Homo sapiens OX=9606 GN=CSE1L PE=1 SV=3
Q9H361	34	32	1	Carbamidomethylation; Oxidation (M); Acetylation (Protein N-term)	292730	0	298730	70031	Polyadenylate-binding protein 3 OS=Homo sapiens OX=9606 GN=PABPC3 PE=1 SV=2
Q99536	60	23	23	Acetylation (Protein N-term)	169670000	349270000	334500000	41920	Synaptic vesicle membrane protein VAT-1 homolog OS=Homo sapiens OX=9606 GN=VAT1 PE=1 SV=2
P26374	5	2	2		3364100	3665200	4696200	74071	Rab proteins geranylgeranyltransferase component A 2 OS=Homo sapiens OX=9606 GN=CHML PE=1 SV=2
P52597	51	26	21	Acetylation (Protein N-term)	213790000	311750000	397010000	45672	Heterogeneous nuclear ribonucleoprotein F OS=Homo sapiens OX=9606 GN=HNRNPF PE=1 SV=3
O43318	4	2	2		24013000	31552000	27931000	67196	Mitogen-activated protein kinase kinase kinase 7 OS=Homo sapiens OX=9606 GN=MAP3K7 PE=1 SV=1
Q9NTI5	18	20	18		21950000	36954000	26158000	164666	Sister chromatid cohesion protein PDS5 homolog B OS=Homo sapiens OX=9606 GN=PDS5B PE=1 SV=1
Q13155	41	9	9		40809000	82110000	57924000	35349	Aminoacyl tRNA synthase complex-interacting multifunctional protein 2 OS=Homo sapiens OX=9606 GN=AIMP2 PE=1 SV=2
O75940	29	5	5		21945000	15737000	33740000	26711	Survival of motor neuron-related-splicing factor 30 OS=Homo sapiens OX=9606 GN=SMNDC1 PE=1 SV=1
Q16181	46	20	18		261010000	286550000	255650000	50680	Septin-7 OS=Homo sapiens OX=9606 GN=SEPTIN7 PE=1 SV=2
Q96LD4	11	4	4		7557500	14420000	11064000	69532	E3 ubiquitin-protein ligase TRIM47 OS=Homo sapiens OX=9606 GN=TRIM47 PE=1 SV=2
Q96N66	15	6	6		21873000	50342000	31477000	52765	Lysophospholipid acyltransferase 7 OS=Homo sapiens OX=9606 GN=MBOAT7 PE=1 SV=2
Q8N5N7	49	5	5		5245000	9972100	11136000	18325	39S ribosomal protein L50 mitochondrial OS=Homo sapiens OX=9606 GN=MRPL50 PE=1 SV=2
Q96RU3	6	4	4		5475800	9866200	9647900	71307	Formin-binding protein 1 OS=Homo sapiens OX=9606 GN=FNBP1 PE=1 SV=2
P57737	11	4	4		1499200	385900	2370600	100605	Coronin-7 OS=Homo sapiens OX=9606 GN=CORO7 PE=1 SV=2
Q05682	30	23	22		174170000	289430000	251400000	93231	Caldesmon OS=Homo sapiens OX=9606 GN=CALD1 PE=1 SV=3
Q8N3D4	15	13	13		16703000	39344000	39486000	161854	EH domain-binding protein 1-like protein 1 OS=Homo sapiens OX=9606 GN=EHBP1L1 PE=1 SV=2
Q69YH5	6	3	3		209780	273670	305750	112676	Cell division cycle-associated protein 2 OS=Homo sapiens OX=9606 GN=CDCA2 PE=1 SV=2
P01023	1	2	2		4840600	20857000	18196000	163290	Alpha-2-macroglobulin OS=Homo sapiens OX=9606 GN=A2M PE=1 SV=3
P20742	1	2	2		4840600	20857000	18196000	163862	Pregnancy zone protein OS=Homo sapiens OX=9606 GN=PZP PE=1 SV=4
Q8N2F6	10	2	2		195910	2683100	9614700	37540	Armadillo repeat-containing protein 10 OS=Homo sapiens OX=9606 GN=ARMC10 PE=1 SV=1
O96019	48	16	14	Acetylation (Protein N-term)	79418000	103920000	134080000	47461	Actin-like protein 6A OS=Homo sapiens OX=9606 GN=ACTL6A PE=1 SV=1
O75608	10	2	2	Acetylation (Protein N-term)	16627000	38584000	34932000	24670	Acyl-protein thioesterase 1 OS=Homo sapiens OX=9606 GN=LYPLA1 PE=1 SV=1
Q9H3R2	5	2	2		6722700	28562000	27364000	54604	Mucin-13 OS=Homo sapiens OX=9606 GN=MUC13 PE=1 SV=3
O15121	16	3	3		7037000	3483400	5753900	37866	Sphingolipid delta(4)-desaturase DES1 OS=Homo sapiens OX=9606 GN=DEGS1 PE=1 SV=1
P22695	53	15	15		85875000	147050000	154980000	48443	Cytochrome b-c1 complex subunit 2 mitochondrial OS=Homo sapiens OX=9606 GN=UQCRC2 PE=1 SV=3
Q13126	53	11	11	Oxidation (M); Acetylation (Protein N-term)	78209000	60378000	37754000	31236	S-methyl-5'-thioadenosine phosphorylase OS=Homo sapiens OX=9606 GN=MTAP PE=1 SV=2
P30049	58	5	5		46452000	33582000	20731000	17490	ATP synthase subunit delta mitochondrial OS=Homo sapiens OX=9606 GN=ATP5F1D PE=1 SV=2
Q15345	5	2	2		248440	0	0	88650	Leucine-rich repeat-containing protein 41 OS=Homo sapiens OX=9606 GN=LRRC41 PE=1 SV=3
O43488	21	5	5		17939000	22332000	29410000	39589	Aflatoxin B1 aldehyde reductase member 2 OS=Homo sapiens OX=9606 GN=AKR7A2 PE=1 SV=3
O75691	15	30	30		182040000	207850000	175970000	318385	Small subunit processome component 20 homolog OS=Homo sapiens OX=9606 GN=UTP20 PE=1 SV=3
P36578	50	53	53	Carbamidomethylation	1374600000	1572600000	1647300000	47697	60S ribosomal protein L4 OS=Homo sapiens OX=9606 GN=RPL4 PE=1 SV=5
Q9BXW7	38	9	9		7830000	24174000	13128000	46321	Haloacid dehalogenase-like hydrolase domain-containing 5 OS=Homo sapiens OX=9606 GN=HDHD5 PE=1 SV=1
P29992	20	5	2		969460	1252600	1477500	42123	Guanine nucleotide-binding protein subunit alpha-11 OS=Homo sapiens OX=9606 GN=GNA11 PE=1 SV=2
Q53H96	5	1	1		3670900	4529800	4059600	28663	Pyrroline-5-carboxylate reductase 3 OS=Homo sapiens OX=9606 GN=PYCR3 PE=1 SV=3
P11171	6	4	2		1392500	3480500	2605600	97017	Protein 4.1 OS=Homo sapiens OX=9606 GN=EPB41 PE=1 SV=4
Q9BYD1	51	8	8		95303000	232720000	282910000	20692	39S ribosomal protein L13 mitochondrial OS=Homo sapiens OX=9606 GN=MRPL13 PE=1 SV=1
P62873	20	7	2	Acetylation (Protein N-term)	5046700	7576300	16427000	37377	Guanine nucleotide-binding protein G(I)/G(S)/G(T) subunit beta-1 OS=Homo sapiens OX=9606 GN=GNB1 PE=1 SV=3
Q9BTA9	6	2	2		648520	2161800	2180200	70724	WW domain-containing adapter protein with coiled-coil OS=Homo sapiens OX=9606 GN=WAC PE=1 SV=3
O60885	3	4	3		2098200	3446200	3812700	152218	Bromodomain-containing protein 4 OS=Homo sapiens OX=9606 GN=BRD4 PE=1 SV=2
P50395	58	26	18		356040000	278740000	330030000	50663	Rab GDP dissociation inhibitor beta OS=Homo sapiens OX=9606 GN=GDI2 PE=1 SV=2
Q13619	30	20	14		168250000	73977000	63478000	87680	Cullin-4A OS=Homo sapiens OX=9606 GN=CUL4A PE=1 SV=3
Q8WVM0	7	2	2		1423600	3478700	4264400	39543	Dimethyladenosine transferase 1 mitochondrial OS=Homo sapiens OX=9606 GN=TFB1M PE=1 SV=1
Q92945	58	34	30	Acetylation (Protein N-term)	321560000	723460000	658640000	73115	Far upstream element-binding protein 2 OS=Homo sapiens OX=9606 GN=KHSRP PE=1 SV=4
Q9H2J4	11	2	2	Acetylation (Protein N-term)	2073100	2472000	4893900	27614	Phosducin-like protein 3 OS=Homo sapiens OX=9606 GN=PDCL3 PE=1 SV=1
O15504	8	2	2		1286300	1104600	2320600	44872	Nucleoporin NUP42 OS=Homo sapiens OX=9606 GN=NUP42 PE=1 SV=1
P29373	32	5	5		88013000	74213000	58595000	15693	Cellular retinoic acid-binding protein 2 OS=Homo sapiens OX=9606 GN=CRABP2 PE=1 SV=2
P10398	6	3	3		4411400	11093000	6309800	67585	Serine/threonine-protein kinase A-Raf OS=Homo sapiens OX=9606 GN=ARAF PE=1 SV=2
Q70J99	3	2	2		664900	1810700	1821300	123282	Protein unc-13 homolog D OS=Homo sapiens OX=9606 GN=UNC13D PE=1 SV=1
O00233	33	6	6		14466000	37711000	24232000	24682	26S proteasome non-ATPase regulatory subunit 9 OS=Homo sapiens OX=9606 GN=PSMD9 PE=1 SV=3
Q9H0G5	6	2	2		2611800	7838800	4238300	66390	Nuclear speckle splicing regulatory protein 1 OS=Homo sapiens OX=9606 GN=NSRP1 PE=1 SV=1
O95456	18	4	4	Acetylation (Protein N-term)	23008000	31514000	38029000	32854	Proteasome assembly chaperone 1 OS=Homo sapiens OX=9606 GN=PSMG1 PE=1 SV=1
O60825	11	5	5		7365300	12721000	13225000	58477	6-phosphofructo-2-kinase/fructose-2 6-bisphosphatase 2 OS=Homo sapiens OX=9606 GN=PFKFB2 PE=1 SV=2
Q06587	18	4	3		1812200	2291800	3857000	42429	E3 ubiquitin-protein ligase RING1 OS=Homo sapiens OX=9606 GN=RING1 PE=1 SV=2
Q9Y3D0	13	1	1		3546400	4924700	5472800	17663	Cytosolic iron-sulfur assembly component 2B OS=Homo sapiens OX=9606 GN=CIAO2B PE=1 SV=1
Q8IXS6	9	2	2		521760	1326700	847580	42185	Paralemmin-2 OS=Homo sapiens OX=9606 GN=PALM2 PE=1 SV=3
Q8N0U8	10	2	2		1819100	0	53972	19836	Vitamin K epoxide reductase complex subunit 1-like protein 1 OS=Homo sapiens OX=9606 GN=VKORC1L1 PE=1 SV=2
Q9BTU6	19	5	5		4434100	1254200	8666800	54022	Phosphatidylinositol 4-kinase type 2-alpha OS=Homo sapiens OX=9606 GN=PI4K2A PE=1 SV=1
Q5JTJ3	13	2	2		6593600	14936000	11966000	14116	Cytochrome c oxidase assembly factor 6 homolog OS=Homo sapiens OX=9606 GN=COA6 PE=1 SV=1
Q7KZN9	6	2	2		209390	3529700	2125500	46030	Cytochrome c oxidase assembly protein COX15 homolog OS=Homo sapiens OX=9606 GN=COX15 PE=1 SV=1
Q9BXB4	5	2	2		860260	2198300	2342100	83643	Oxysterol-binding protein-related protein 11 OS=Homo sapiens OX=9606 GN=OSBPL11 PE=1 SV=2
Q9H9J2	26	9	9		30325000	22972000	34092000	37535	39S ribosomal protein L44 mitochondrial OS=Homo sapiens OX=9606 GN=MRPL44 PE=1 SV=1
P10620	18	2	2		1425600	288770	339350	17599	Microsomal glutathione S-transferase 1 OS=Homo sapiens OX=9606 GN=MGST1 PE=1 SV=1
Q9UPN7	6	2	2		0	1534200	702590	96724	Serine/threonine-protein phosphatase 6 regulatory subunit 1 OS=Homo sapiens OX=9606 GN=PPP6R1 PE=1 SV=5
P63272	14	1	1		0	0	1207100	13193	Transcription elongation factor SPT4 OS=Homo sapiens OX=9606 GN=SUPT4H1 PE=1 SV=1
Q86XP3	41	22	22		78386000	71053000	107100000	102975	ATP-dependent RNA helicase DDX42 OS=Homo sapiens OX=9606 GN=DDX42 PE=1 SV=1
P51148	66	13	8	Oxidation (M)	42946000	55416000	72553000	23483	Ras-related protein Rab-5C OS=Homo sapiens OX=9606 GN=RAB5C PE=1 SV=2
Q9C0H2	6	2	2	Acetylation (Protein N-term)	228600	0	0	57545	Protein tweety homolog 3 OS=Homo sapiens OX=9606 GN=TTYH3 PE=1 SV=3
P54105	49	7	7		63148000	62067000	99979000	26215	Methylosome subunit pICln OS=Homo sapiens OX=9606 GN=CLNS1A PE=1 SV=1
O60907	16	6	1		0	0	2457800	62496	F-box-like/WD repeat-containing protein TBL1X OS=Homo sapiens OX=9606 GN=TBL1X PE=1 SV=3
Q9BV20	18	5	5		13003000	21062000	21878000	39150	Methylthioribose-1-phosphate isomerase OS=Homo sapiens OX=9606 GN=MRI1 PE=1 SV=1
Q9UID3	4	2	2		989590	1599100	1693900	86042	Vacuolar protein sorting-associated protein 51 homolog OS=Homo sapiens OX=9606 GN=VPS51 PE=1 SV=2
Q14738	22	8	8		17746000	16462000	19871000	69992	Serine/threonine-protein phosphatase 2A 56 kDa regulatory subunit delta isoform OS=Homo sapiens OX=9606 GN=PPP2R5D PE=1 SV=1
Q8IUF8	9	2	2		0	0	1697600	52800	Ribosomal oxygenase 2 OS=Homo sapiens OX=9606 GN=RIOX2 PE=1 SV=1
Q9NSI2	16	2	2		768040	73323	644670	25456	Protein FAM207A OS=Homo sapiens OX=9606 GN=FAM207A PE=1 SV=2
Q6UW78	24	1	1		1396900	0	150430	10081	Ubiquinol-cytochrome-c reductase complex assembly factor 3 OS=Homo sapiens OX=9606 GN=UQCC3 PE=1 SV=2
Q8TB37	12	2	2		0	0	1037000	34083	Iron-sulfur protein NUBPL OS=Homo sapiens OX=9606 GN=NUBPL PE=1 SV=3
P53384	8	2	2		8521800	14012000	17431000	34535	Cytosolic Fe-S cluster assembly factor NUBP1 OS=Homo sapiens OX=9606 GN=NUBP1 PE=1 SV=2
Q08379	13	11	11		15079000	30899000	31505000	113086	Golgin subfamily A member 2 OS=Homo sapiens OX=9606 GN=GOLGA2 PE=1 SV=3
P50225	22	5	2	Oxidation (M); Acetylation (Protein N-term)	6569100	15347000	5825300	34165	Sulfotransferase 1A1 OS=Homo sapiens OX=9606 GN=SULT1A1 PE=1 SV=3
P62263	60	19	19		632470000	1002400000	886030000	16273	40S ribosomal protein S14 OS=Homo sapiens OX=9606 GN=RPS14 PE=1 SV=3
P63000	24	7	7		72481000	155230000	203400000	21450	Ras-related C3 botulinum toxin substrate 1 OS=Homo sapiens OX=9606 GN=RAC1 PE=1 SV=1
O95563	17	2	2		236100	468460	599740	14279	Mitochondrial pyruvate carrier 2 OS=Homo sapiens OX=9606 GN=MPC2 PE=1 SV=1
Q9H6B4	14	3	2		0	206900	664230	41281	CXADR-like membrane protein OS=Homo sapiens OX=9606 GN=CLMP PE=1 SV=1
P08758	75	27	26	Acetylation (Protein N-term)	727750000	411990000	339760000	35937	Annexin A5 OS=Homo sapiens OX=9606 GN=ANXA5 PE=1 SV=2
Q93096	29	4	2		385070	591260	363640	19815	Protein tyrosine phosphatase type IVA 1 OS=Homo sapiens OX=9606 GN=PTP4A1 PE=1 SV=2
Q92766	3	2	2		0	0	36303	181419	Ras-responsive element-binding protein 1 OS=Homo sapiens OX=9606 GN=RREB1 PE=1 SV=3
Q9ULW3	13	3	3		43773000	33026000	32589000	31079	Activator of basal transcription 1 OS=Homo sapiens OX=9606 GN=ABT1 PE=1 SV=1
O95059	13	1	1		37485	0	254620	13693	Ribonuclease P protein subunit p14 OS=Homo sapiens OX=9606 GN=RPP14 PE=1 SV=3
Q96J42	14	2	2		242090	0	0	39885	Thioredoxin domain-containing protein 15 OS=Homo sapiens OX=9606 GN=TXNDC15 PE=1 SV=1
O14893	5	1	1	Acetylation (Protein N-term)	106570	0	0	31585	Gem-associated protein 2 OS=Homo sapiens OX=9606 GN=GEMIN2 PE=1 SV=1
Q09472	2	4	2		1943900	7862500	9202100	264158	Histone acetyltransferase p300 OS=Homo sapiens OX=9606 GN=EP300 PE=1 SV=2
Q9BXF6	6	2	2		1148300	10096	76265	70415	Rab11 family-interacting protein 5 OS=Homo sapiens OX=9606 GN=RAB11FIP5 PE=1 SV=1
Q9Y5Q8	7	2	2	Acetylation (Protein N-term)	1165800	2342000	2403700	59571	General transcription factor 3C polypeptide 5 OS=Homo sapiens OX=9606 GN=GTF3C5 PE=1 SV=2
P60510	7	2	2		4030100	10978000	3260500	35080	Serine/threonine-protein phosphatase 4 catalytic subunit OS=Homo sapiens OX=9606 GN=PPP4C PE=1 SV=1
Q96EK9	12	2	2		0	179070	0	38616	Protein KTI12 homolog OS=Homo sapiens OX=9606 GN=KTI12 PE=1 SV=1
P16402	33	20	2	Acetylation (Protein N-term)	90391000	83783000	78703000	22350	Histone H1.3 OS=Homo sapiens OX=9606 GN=H1-3 PE=1 SV=2
Q52LJ0	34	10	7	Acetylation (Protein N-term)	37596000	66473000	37469000	45547	Protein FAM98B OS=Homo sapiens OX=9606 GN=FAM98B PE=1 SV=2
Q9Y4Z0	17	2	2	Acetylation (Protein N-term)	117310	56658	104190	15350	U6 snRNA-associated Sm-like protein LSm4 OS=Homo sapiens OX=9606 GN=LSM4 PE=1 SV=1
Q9P2W9	6	1	1		0	298710	0	38674	Syntaxin-18 OS=Homo sapiens OX=9606 GN=STX18 PE=1 SV=1
O15270	8	2	2		188700	241180	1897000	62924	Serine palmitoyltransferase 2 OS=Homo sapiens OX=9606 GN=SPTLC2 PE=1 SV=1
Q9UKM7	5	2	2		0	0	282190	79580	Endoplasmic reticulum mannosyl-oligosaccharide 1 2-alpha-mannosidase OS=Homo sapiens OX=9606 GN=MAN1B1 PE=1 SV=2
P19447	6	2	2		0	107130	5317600	89278	General transcription and DNA repair factor IIH helicase subunit XPB OS=Homo sapiens OX=9606 GN=ERCC3 PE=1 SV=1
P61769	38	6	6		179960000	101640000	79519000	13715	Beta-2-microglobulin OS=Homo sapiens OX=9606 GN=B2M PE=1 SV=1
Q8NB16	6	2	2		321270	633020	1496500	54479	Mixed lineage kinase domain-like protein OS=Homo sapiens OX=9606 GN=MLKL PE=1 SV=1
Q8WUH2	2	1	1		0	0	44278	97158	Transforming growth factor-beta receptor-associated protein 1 OS=Homo sapiens OX=9606 GN=TGFBRAP1 PE=1 SV=1
P17096	41	6	6		204960000	401360000	298690000	11676	High mobility group protein HMG-I/HMG-Y OS=Homo sapiens OX=9606 GN=HMGA1 PE=1 SV=3
Q9Y4H2	2	2	2		20124000	3526700	3254200	137334	Insulin receptor substrate 2 OS=Homo sapiens OX=9606 GN=IRS2 PE=1 SV=2
Q9UJX3	7	3	3		4187400	3488400	6353200	66856	Anaphase-promoting complex subunit 7 OS=Homo sapiens OX=9606 GN=ANAPC7 PE=1 SV=4
Q8N5A5	15	6	6	Acetylation (Protein N-term)	13868000	33729000	17332000	57359	Zinc finger CCCH-type with G patch domain-containing protein OS=Homo sapiens OX=9606 GN=ZGPAT PE=1 SV=3
Q96A65	3	2	2		2362900	5177800	5800900	110498	Exocyst complex component 4 OS=Homo sapiens OX=9606 GN=EXOC4 PE=1 SV=1
Q9UKA9	12	3	2		2254100	1449300	1284800	57491	Polypyrimidine tract-binding protein 2 OS=Homo sapiens OX=9606 GN=PTBP2 PE=1 SV=1
O60343	7	6	6		3108800	3100500	1830700	146563	TBC1 domain family member 4 OS=Homo sapiens OX=9606 GN=TBC1D4 PE=1 SV=2
P78563	8	2	2		225510	0	420780	80763	Double-stranded RNA-specific editase 1 OS=Homo sapiens OX=9606 GN=ADARB1 PE=1 SV=1
Q96A33	33	15	15		72583000	108360000	152890000	55874	PAT complex subunit CCDC47 OS=Homo sapiens OX=9606 GN=CCDC47 PE=1 SV=1
Q16762	27	5	5		4952900	17598000	17268000	33429	Thiosulfate sulfurtransferase OS=Homo sapiens OX=9606 GN=TST PE=1 SV=4
O14763	7	2	2		84765	825400	571480	47878	Tumor necrosis factor receptor superfamily member 10B OS=Homo sapiens OX=9606 GN=TNFRSF10B PE=1 SV=2
Q86YP4	8	4	2		13038000	6739800	7550000	68063	Transcriptional repressor p66-alpha OS=Homo sapiens OX=9606 GN=GATAD2A PE=1 SV=1
P50990	64	46	46	Oxidation (M)	970580000	1940400000	1772500000	59621	T-complex protein 1 subunit theta OS=Homo sapiens OX=9606 GN=CCT8 PE=1 SV=4
O15067	23	24	24		153280000	226620000	232030000	144734	Phosphoribosylformylglycinamidine synthase OS=Homo sapiens OX=9606 GN=PFAS PE=1 SV=4
Q9UGU0	3	2	2		6108700	0	0	211769	Transcription factor 20 OS=Homo sapiens OX=9606 GN=TCF20 PE=1 SV=3
P42771	48	9	9	Oxidation (M); Acetylation (Protein N-term)	166840000	126800000	160100000	16533	Cyclin-dependent kinase inhibitor 2A OS=Homo sapiens OX=9606 GN=CDKN2A PE=1 SV=2
O15230	1	2	2		0	0	1288800	399740	Laminin subunit alpha-5 OS=Homo sapiens OX=9606 GN=LAMA5 PE=1 SV=8
Q8IX18	3	2	2		875500	100240	485590	88560	Probable ATP-dependent RNA helicase DHX40 OS=Homo sapiens OX=9606 GN=DHX40 PE=1 SV=2
P32780	6	2	2		136520	156390	310960	62032	General transcription factor IIH subunit 1 OS=Homo sapiens OX=9606 GN=GTF2H1 PE=1 SV=1
O75475	40	24	21	Oxidation (M)	209470000	123900000	135170000	60103	PC4 and SFRS1-interacting protein OS=Homo sapiens OX=9606 GN=PSIP1 PE=1 SV=1
Q9H845	8	2	2		120820	0	0	68760	Complex I assembly factor ACAD9 mitochondrial OS=Homo sapiens OX=9606 GN=ACAD9 PE=1 SV=1
Q92889	4	2	2		17572	368660	270490	104486	DNA repair endonuclease XPF OS=Homo sapiens OX=9606 GN=ERCC4 PE=1 SV=3
Q9Y2V7	4	2	2		857040	892170	1070300	73279	Conserved oligomeric Golgi complex subunit 6 OS=Homo sapiens OX=9606 GN=COG6 PE=1 SV=2
O15382	14	2	2		1196200	0	593560	44288	Branched-chain-amino-acid aminotransferase mitochondrial OS=Homo sapiens OX=9606 GN=BCAT2 PE=1 SV=2
O43772	16	2	2		127600	0	0	32944	Mitochondrial carnitine/acylcarnitine carrier protein OS=Homo sapiens OX=9606 GN=SLC25A20 PE=1 SV=1
Q9NRG7	13	2	2		194420	0	136550	31077	Epimerase family protein SDR39U1 OS=Homo sapiens OX=9606 GN=SDR39U1 PE=1 SV=3
Q13433	4	2	2		551350	0	0	85047	Zinc transporter ZIP6 OS=Homo sapiens OX=9606 GN=SLC39A6 PE=1 SV=3
O60507	5	1	1		139060	0	0	42188	Protein-tyrosine sulfotransferase 1 OS=Homo sapiens OX=9606 GN=TPST1 PE=1 SV=1
Q9ULR0	9	2	2		3150500	6392300	4155500	32992	Pre-mRNA-splicing factor ISY1 homolog OS=Homo sapiens OX=9606 GN=ISY1 PE=1 SV=3
Q9NVM6	13	2	2		390620	0	480570	34687	DnaJ homolog subfamily C member 17 OS=Homo sapiens OX=9606 GN=DNAJC17 PE=1 SV=1
O15228	2	2	2		0	0	43150	77188	Dihydroxyacetone phosphate acyltransferase OS=Homo sapiens OX=9606 GN=GNPAT PE=1 SV=1
P62875	61	2	2		901490	0	0	7645	DNA-directed RNA polymerases I II and III subunit RPABC5 OS=Homo sapiens OX=9606 GN=POLR2L PE=1 SV=1
P28482	32	10	8	Acetylation (Protein N-term)	54964000	78168000	85545000	41390	Mitogen-activated protein kinase 1 OS=Homo sapiens OX=9606 GN=MAPK1 PE=1 SV=3
O75051	1	2	2		34055	0	63762	211103	Plexin-A2 OS=Homo sapiens OX=9606 GN=PLXNA2 PE=1 SV=4
P30086	61	10	10		410000000	380710000	497000000	21057	Phosphatidylethanolamine-binding protein 1 OS=Homo sapiens OX=9606 GN=PEBP1 PE=1 SV=3
Q8WYP5	17	28	28		67828000	78112000	78227000	252496	Protein ELYS OS=Homo sapiens OX=9606 GN=AHCTF1 PE=1 SV=3
O15127	10	2	2		3122400	730620	1339900	36649	Secretory carrier-associated membrane protein 2 OS=Homo sapiens OX=9606 GN=SCAMP2 PE=1 SV=2
O95714	1	2	2		10343000	921100	305910	527234	E3 ubiquitin-protein ligase HERC2 OS=Homo sapiens OX=9606 GN=HERC2 PE=1 SV=2
Q8ND56	16	6	6		31014000	18285000	20994000	50530	Protein LSM14 homolog A OS=Homo sapiens OX=9606 GN=LSM14A PE=1 SV=3
O75330	4	2	2		852150	2259900	2351600	84100	Hyaluronan mediated motility receptor OS=Homo sapiens OX=9606 GN=HMMR PE=1 SV=2
P24844	51	9	2	Oxidation (M)	16207000	8547000	9445500	19827	Myosin regulatory light polypeptide 9 OS=Homo sapiens OX=9606 GN=MYL9 PE=1 SV=4
Q14554	8	2	2		3158400	0	0	59594	Protein disulfide-isomerase A5 OS=Homo sapiens OX=9606 GN=PDIA5 PE=1 SV=1
Q07020	46	19	19	Carbamidomethylation	557540000	744290000	788150000	21634	60S ribosomal protein L18 OS=Homo sapiens OX=9606 GN=RPL18 PE=1 SV=2
Q7Z6Z7	17	47	46		92012000	118020000	131610000	481896	E3 ubiquitin-protein ligase HUWE1 OS=Homo sapiens OX=9606 GN=HUWE1 PE=1 SV=3
Q9Y3I1	9	3	3		2479400	2925800	4007100	58503	F-box only protein 7 OS=Homo sapiens OX=9606 GN=FBXO7 PE=1 SV=1
P18615	31	7	7		9524000	26821000	16898000	43240	Negative elongation factor E OS=Homo sapiens OX=9606 GN=NELFE PE=1 SV=3
Q01813	33	24	22	Oxidation (M)	214770000	239660000	283000000	85596	ATP-dependent 6-phosphofructokinase platelet type OS=Homo sapiens OX=9606 GN=PFKP PE=1 SV=2
Q13573	49	23	22	Acetylation (Protein N-term)	78468000	163710000	107020000	61495	SNW domain-containing protein 1 OS=Homo sapiens OX=9606 GN=SNW1 PE=1 SV=1
Q9ULI0	2	2	2		1469300	0	286350	164913	ATPase family AAA domain-containing protein 2B OS=Homo sapiens OX=9606 GN=ATAD2B PE=1 SV=3
Q53EP0	3	2	2		573340	0	0	132888	Fibronectin type III domain-containing protein 3B OS=Homo sapiens OX=9606 GN=FNDC3B PE=1 SV=2
Q96I99	28	10	10		50528000	29435000	56082000	46511	Succinate--CoA ligase [GDP-forming] subunit beta mitochondrial OS=Homo sapiens OX=9606 GN=SUCLG2 PE=1 SV=2
Q9H6V9	7	2	2		846470	876660	1191300	37319	Lipid droplet-associated hydrolase OS=Homo sapiens OX=9606 GN=LDAH PE=1 SV=1
P11908	42	12	4		31757000	38406000	57294000	34769	Ribose-phosphate pyrophosphokinase 2 OS=Homo sapiens OX=9606 GN=PRPS2 PE=1 SV=2
Q15906	14	2	2		749480	0	0	40594	Vacuolar protein sorting-associated protein 72 homolog OS=Homo sapiens OX=9606 GN=VPS72 PE=1 SV=1
Q13572	9	2	2		170930	0	0	45621	Inositol-tetrakisphosphate 1-kinase OS=Homo sapiens OX=9606 GN=ITPK1 PE=1 SV=2
Q99757	22	2	2		6032300	1426100	69695000	18383	Thioredoxin mitochondrial OS=Homo sapiens OX=9606 GN=TXN2 PE=1 SV=2
Q9P0J7	8	2	2		67053	0	0	41945	E3 ubiquitin-protein ligase KCMF1 OS=Homo sapiens OX=9606 GN=KCMF1 PE=1 SV=2
O00244	13	1	1		18185000	30192000	23711000	7402	Copper transport protein ATOX1 OS=Homo sapiens OX=9606 GN=ATOX1 PE=1 SV=1
P26373	56	17	17	Oxidation (M)	527490000	993300000	792810000	24261	60S ribosomal protein L13 OS=Homo sapiens OX=9606 GN=RPL13 PE=1 SV=4
P07711	11	2	2		3028300	1277400	1718500	37564	Procathepsin L OS=Homo sapiens OX=9606 GN=CTSL PE=1 SV=2
Q9NV35	14	2	2		1176300	1205200	1444100	18609	Nucleotide triphosphate diphosphatase NUDT15 OS=Homo sapiens OX=9606 GN=NUDT15 PE=1 SV=1
O15260	16	3	3		16155000	28248000	29597000	30394	Surfeit locus protein 4 OS=Homo sapiens OX=9606 GN=SURF4 PE=1 SV=3
Q96BJ3	20	4	4		3583000	3473800	6561800	35023	Axin interactor dorsalization-associated protein OS=Homo sapiens OX=9606 GN=AIDA PE=1 SV=1
Q6NXR4	7	2	2		385340	296880	1406600	56915	TELO2-interacting protein 2 OS=Homo sapiens OX=9606 GN=TTI2 PE=1 SV=1
Q12834	8	2	2	Acetylation (Protein N-term)	1296100	341270	451130	54723	Cell division cycle protein 20 homolog OS=Homo sapiens OX=9606 GN=CDC20 PE=1 SV=2
O15360	2	2	2		134540	0	0	162774	Fanconi anemia group A protein OS=Homo sapiens OX=9606 GN=FANCA PE=1 SV=2
Q9Y3C6	27	4	4		49956000	88808000	79823000	18237	Peptidyl-prolyl cis-trans isomerase-like 1 OS=Homo sapiens OX=9606 GN=PPIL1 PE=1 SV=1
Q6DKJ4	9	2	2		2035800	4206800	5716300	48392	Nucleoredoxin OS=Homo sapiens OX=9606 GN=NXN PE=1 SV=2
P01024	2	2	2		2316500	3505400	7132200	187147	Complement C3 OS=Homo sapiens OX=9606 GN=C3 PE=1 SV=2
Q13464	5	5	2		511250	1392000	1025600	158174	Rho-associated protein kinase 1 OS=Homo sapiens OX=9606 GN=ROCK1 PE=1 SV=1
Q9NR48	1	2	2	Carbamidomethylation	25892000	54369000	35841000	332790	Histone-lysine N-methyltransferase ASH1L OS=Homo sapiens OX=9606 GN=ASH1L PE=1 SV=2
O60664	59	21	21	Oxidation (M)	130880000	370000000	390200000	47075	Perilipin-3 OS=Homo sapiens OX=9606 GN=PLIN3 PE=1 SV=3
P39748	36	15	15		258070000	302110000	317110000	42593	Flap endonuclease 1 OS=Homo sapiens OX=9606 GN=FEN1 PE=1 SV=1
Q7Z7L1	4	2	2		294600	0	0	102836	Schlafen family member 11 OS=Homo sapiens OX=9606 GN=SLFN11 PE=1 SV=2
P17655	36	20	20		114670000	157150000	155290000	79995	Calpain-2 catalytic subunit OS=Homo sapiens OX=9606 GN=CAPN2 PE=1 SV=6
Q9BW71	5	2	2		2387600	2098100	2477300	61957	HIRA-interacting protein 3 OS=Homo sapiens OX=9606 GN=HIRIP3 PE=1 SV=3
Q9NYU2	20	18	18		123490000	151440000	132090000	177189	UDP-glucose:glycoprotein glucosyltransferase 1 OS=Homo sapiens OX=9606 GN=UGGT1 PE=1 SV=3
Q16629	34	13	11		156610000	325140000	244400000	27367	Serine/arginine-rich splicing factor 7 OS=Homo sapiens OX=9606 GN=SRSF7 PE=1 SV=1
P62993	35	7	7		29199000	70973000	70574000	25206	Growth factor receptor-bound protein 2 OS=Homo sapiens OX=9606 GN=GRB2 PE=1 SV=1
Q8N8A6	11	4	4		3724400	2568700	1626600	72457	ATP-dependent RNA helicase DDX51 OS=Homo sapiens OX=9606 GN=DDX51 PE=1 SV=3
O00468	1	2	2		10046000	4265100	13401000	217318	Agrin OS=Homo sapiens OX=9606 GN=AGRN PE=1 SV=6
Q9BPX6	7	2	2		898550	201000	528320	54351	Calcium uptake protein 1 mitochondrial OS=Homo sapiens OX=9606 GN=MICU1 PE=1 SV=1
Q9P2R3	14	10	10		16096000	6789100	7588000	128399	Rabankyrin-5 OS=Homo sapiens OX=9606 GN=ANKFY1 PE=1 SV=2
Q9NX14	22	2	2		17491000	6330100	3723400	17317	NADH dehydrogenase [ubiquinone] 1 beta subcomplex subunit 11 mitochondrial OS=Homo sapiens OX=9606 GN=NDUFB11 PE=1 SV=1
Q9BXJ9	27	25	25		100950000	163990000	201810000	101272	N-alpha-acetyltransferase 15 NatA auxiliary subunit OS=Homo sapiens OX=9606 GN=NAA15 PE=1 SV=1
Q5H8A4	4	2	2		870040	513640	1968600	108173	GPI ethanolamine phosphate transferase 2 OS=Homo sapiens OX=9606 GN=PIGG PE=1 SV=1
Q14232	28	8	8	Acetylation (Protein N-term)	35872000	37434000	47711000	33712	Translation initiation factor eIF-2B subunit alpha OS=Homo sapiens OX=9606 GN=EIF2B1 PE=1 SV=1
Q86VP6	28	29	29	Acetylation (Protein N-term)	272940000	422670000	446600000	136375	Cullin-associated NEDD8-dissociated protein 1 OS=Homo sapiens OX=9606 GN=CAND1 PE=1 SV=2
Q8NE71	51	39	39		139890000	276560000	229880000	95926	ATP-binding cassette sub-family F member 1 OS=Homo sapiens OX=9606 GN=ABCF1 PE=1 SV=2
Q9UQ35	19	36	36	Oxidation (M); Acetylation (Protein N-term)	298520000	380150000	339380000	299616	Serine/arginine repetitive matrix protein 2 OS=Homo sapiens OX=9606 GN=SRRM2 PE=1 SV=2
P00387	58	19	19		215100000	112510000	468780000	34235	NADH-cytochrome b5 reductase 3 OS=Homo sapiens OX=9606 GN=CYB5R3 PE=1 SV=3
Q14694	33	16	16	Acetylation (Protein N-term)	48218000	80960000	46741000	87134	Ubiquitin carboxyl-terminal hydrolase 10 OS=Homo sapiens OX=9606 GN=USP10 PE=1 SV=2
O43583	27	6	6		32150000	57282000	54851000	22092	Density-regulated protein OS=Homo sapiens OX=9606 GN=DENR PE=1 SV=2
Q9H9Y2	25	5	5		25248000	29215000	47572000	40111	Ribosome production factor 1 OS=Homo sapiens OX=9606 GN=RPF1 PE=1 SV=2
P36405	24	3	3		18012000	16248000	23340000	20456	ADP-ribosylation factor-like protein 3 OS=Homo sapiens OX=9606 GN=ARL3 PE=1 SV=2
Q8WUR7	20	2	2		2814700	7289000	5515800	16353	UPF0235 protein C15orf40 OS=Homo sapiens OX=9606 GN=C15orf40 PE=1 SV=2
P55268	5	5	5		45195000	72894000	64321000	195980	Laminin subunit beta-2 OS=Homo sapiens OX=9606 GN=LAMB2 PE=1 SV=2
O00154	21	6	6		21568000	26501000	30286000	41796	Cytosolic acyl coenzyme A thioester hydrolase OS=Homo sapiens OX=9606 GN=ACOT7 PE=1 SV=3
P07737	73	22	22	Oxidation (M)	2970000000	3332100000	3524600000	15054	Profilin-1 OS=Homo sapiens OX=9606 GN=PFN1 PE=1 SV=2
Q68CZ2	8	7	6		6507400	14651000	15129000	155265	Tensin-3 OS=Homo sapiens OX=9606 GN=TNS3 PE=1 SV=2
P31040	43	23	23		196790000	177300000	131810000	72692	Succinate dehydrogenase [ubiquinone] flavoprotein subunit mitochondrial OS=Homo sapiens OX=9606 GN=SDHA PE=1 SV=2
Q9H019	13	2	2		484520	24621	0	31957	Mitochondrial fission regulator 1-like OS=Homo sapiens OX=9606 GN=MTFR1L PE=1 SV=2
Q8WU90	30	14	14		35887000	65343000	87695000	48603	Zinc finger CCCH domain-containing protein 15 OS=Homo sapiens OX=9606 GN=ZC3H15 PE=1 SV=1
P62269	67	22	21	Acetylation (Protein N-term)	472300000	1136500000	843040000	17719	40S ribosomal protein S18 OS=Homo sapiens OX=9606 GN=RPS18 PE=1 SV=3
Q9C0I1	8	4	4		2850000	1458100	6210400	86148	Myotubularin-related protein 12 OS=Homo sapiens OX=9606 GN=MTMR12 PE=1 SV=2
Q8TDN6	59	17	17		164660000	191430000	152120000	41401	Ribosome biogenesis protein BRX1 homolog OS=Homo sapiens OX=9606 GN=BRIX1 PE=1 SV=2
O00483	32	3	3		41117000	31562000	22563000	9370	Cytochrome c oxidase subunit NDUFA4 OS=Homo sapiens OX=9606 GN=NDUFA4 PE=1 SV=1
Q86UV5	3	2	2		2195700	3073000	5932200	119032	Ubiquitin carboxyl-terminal hydrolase 48 OS=Homo sapiens OX=9606 GN=USP48 PE=1 SV=1
Q8TB61	8	3	3		20861000	9217600	6246000	47515	Adenosine 3'-phospho 5'-phosphosulfate transporter 1 OS=Homo sapiens OX=9606 GN=SLC35B2 PE=1 SV=1
Q99747	7	2	2		1186900	4304800	3668600	34746	Gamma-soluble NSF attachment protein OS=Homo sapiens OX=9606 GN=NAPG PE=1 SV=1
Q96DH6	18	5	5		20314000	9767200	17638000	35197	RNA-binding protein Musashi homolog 2 OS=Homo sapiens OX=9606 GN=MSI2 PE=1 SV=1
Q9UBX3	15	3	3		12067000	5479700	6753300	31282	Mitochondrial dicarboxylate carrier OS=Homo sapiens OX=9606 GN=SLC25A10 PE=1 SV=2
P05787	82	109	88	Oxidation (M)	4595800000	7962600000	6467300000	53704	Keratin type II cytoskeletal 8 OS=Homo sapiens OX=9606 GN=KRT8 PE=1 SV=7
P40925	41	13	13	Oxidation (M)	351500000	172440000	168830000	36426	Malate dehydrogenase cytoplasmic OS=Homo sapiens OX=9606 GN=MDH1 PE=1 SV=4
P62913	54	12	12	Acetylation (Protein N-term)	482460000	895850000	758090000	20252	60S ribosomal protein L11 OS=Homo sapiens OX=9606 GN=RPL11 PE=1 SV=2
Q9NZ01	26	10	10		217070000	524470000	381610000	36034	Very-long-chain enoyl-CoA reductase OS=Homo sapiens OX=9606 GN=TECR PE=1 SV=1
P78371	69	45	45	Oxidation (M); Acetylation (Protein N-term)	794920000	1215200000	1237200000	57488	T-complex protein 1 subunit beta OS=Homo sapiens OX=9606 GN=CCT2 PE=1 SV=4
Q9UK99	5	1	1		990760	1388700	1055400	54561	F-box only protein 3 OS=Homo sapiens OX=9606 GN=FBXO3 PE=1 SV=3
P49757	5	2	2		1447100	4764800	3907600	70804	Protein numb homolog OS=Homo sapiens OX=9606 GN=NUMB PE=1 SV=2
P78417	38	11	11		100600000	152820000	120980000	27566	Glutathione S-transferase omega-1 OS=Homo sapiens OX=9606 GN=GSTO1 PE=1 SV=2
Q9BZG1	27	5	5		9208600	9768900	12871000	29044	Ras-related protein Rab-34 OS=Homo sapiens OX=9606 GN=RAB34 PE=1 SV=1
O75832	11	2	2		6442700	19282000	9803300	24428	26S proteasome non-ATPase regulatory subunit 10 OS=Homo sapiens OX=9606 GN=PSMD10 PE=1 SV=1
Q05086	3	2	2		5886300	2002500	1757400	100688	Ubiquitin-protein ligase E3A OS=Homo sapiens OX=9606 GN=UBE3A PE=1 SV=4
P08865	58	28	28	Oxidation (M); Acetylation (Protein N-term)	693720000	942450000	1200000000	32854	40S ribosomal protein SA OS=Homo sapiens OX=9606 GN=RPSA PE=1 SV=4
O95425	2	2	2		404570	1409000	1848700	247744	Supervillin OS=Homo sapiens OX=9606 GN=SVIL PE=1 SV=2
Q9NY33	20	8	8		25626000	47720000	54799000	82589	Dipeptidyl peptidase 3 OS=Homo sapiens OX=9606 GN=DPP3 PE=1 SV=2
Q5T280	30	7	7		24556000	59203000	42667000	42009	Putative methyltransferase C9orf114 OS=Homo sapiens OX=9606 GN=SPOUT1 PE=1 SV=3
Q969E8	13	2	2		18060000	3252400	4772900	20894	Pre-rRNA-processing protein TSR2 homolog OS=Homo sapiens OX=9606 GN=TSR2 PE=1 SV=1
O00566	26	14	14		34001000	60186000	47141000	78864	U3 small nucleolar ribonucleoprotein protein MPP10 OS=Homo sapiens OX=9606 GN=MPHOSPH10 PE=1 SV=2
Q99614	20	5	5		6466100	10470000	7431100	33526	Tetratricopeptide repeat protein 1 OS=Homo sapiens OX=9606 GN=TTC1 PE=1 SV=1
Q9UIJ7	21	4	4		13975000	16648000	15664000	25565	GTP:AMP phosphotransferase AK3 mitochondrial OS=Homo sapiens OX=9606 GN=AK3 PE=1 SV=4
P46940	57	91	87	Oxidation (M); Acetylation (Protein N-term)	1183800000	1545000000	1643900000	189251	Ras GTPase-activating-like protein IQGAP1 OS=Homo sapiens OX=9606 GN=IQGAP1 PE=1 SV=1
P37840	38	4	2		12122000	4093600	4127800	14460	Alpha-synuclein OS=Homo sapiens OX=9606 GN=SNCA PE=1 SV=1
O00217	20	4	4		14948000	27786000	22908000	23705	NADH dehydrogenase [ubiquinone] iron-sulfur protein 8 mitochondrial OS=Homo sapiens OX=9606 GN=NDUFS8 PE=1 SV=1
Q96BN8	8	3	3		12538000	17017000	18867000	40263	Ubiquitin thioesterase otulin OS=Homo sapiens OX=9606 GN=OTULIN PE=1 SV=3
P62424	46	21	21	Carbamidomethylation	870510000	1356300000	1142900000	29996	60S ribosomal protein L7a OS=Homo sapiens OX=9606 GN=RPL7A PE=1 SV=2
Q8WWI5	4	2	2		6009800	1474700	138020	73302	Choline transporter-like protein 1 OS=Homo sapiens OX=9606 GN=SLC44A1 PE=1 SV=1
P52292	49	24	24	Acetylation (Protein N-term)	300800000	374840000	359680000	57862	Importin subunit alpha-1 OS=Homo sapiens OX=9606 GN=KPNA2 PE=1 SV=1
O43660	34	10	10		28490000	43711000	27560000	57194	Pleiotropic regulator 1 OS=Homo sapiens OX=9606 GN=PLRG1 PE=1 SV=1
P00568	55	10	10	Oxidation (M)	120820000	207090000	182490000	21635	Adenylate kinase isoenzyme 1 OS=Homo sapiens OX=9606 GN=AK1 PE=1 SV=3
O94901	11	6	6		24161000	32636000	26496000	90064	SUN domain-containing protein 1 OS=Homo sapiens OX=9606 GN=SUN1 PE=1 SV=3
Q53GQ0	9	2	2		1499300	5608500	7273900	34324	Very-long-chain 3-oxoacyl-CoA reductase OS=Homo sapiens OX=9606 GN=HSD17B12 PE=1 SV=2
Q9UMY4	30	5	4		29846000	21226000	51079000	18885	Sorting nexin-12 OS=Homo sapiens OX=9606 GN=SNX12 PE=1 SV=4
Q86VN1	5	2	2		11169000	7741500	7351500	43817	Vacuolar protein-sorting-associated protein 36 OS=Homo sapiens OX=9606 GN=VPS36 PE=1 SV=1
Q92888	10	6	6		26843000	19986000	13295000	102435	Rho guanine nucleotide exchange factor 1 OS=Homo sapiens OX=9606 GN=ARHGEF1 PE=1 SV=2
P47895	7	3	2	Acetylation (Protein N-term)	3324300	1304200	3472800	56109	Aldehyde dehydrogenase family 1 member A3 OS=Homo sapiens OX=9606 GN=ALDH1A3 PE=1 SV=2
Q13232	16	2	2		3634900	5952500	4487400	19015	Nucleoside diphosphate kinase 3 OS=Homo sapiens OX=9606 GN=NME3 PE=1 SV=2
P50502	41	11	5		167870000	133290000	140130000	41332	Hsc70-interacting protein OS=Homo sapiens OX=9606 GN=ST13 PE=1 SV=2
P61006	46	11	4		17288000	32157000	23228000	23668	Ras-related protein Rab-8A OS=Homo sapiens OX=9606 GN=RAB8A PE=1 SV=1
Q9H0S4	47	18	18	Acetylation (Protein N-term)	45287000	56205000	61052000	50647	Probable ATP-dependent RNA helicase DDX47 OS=Homo sapiens OX=9606 GN=DDX47 PE=1 SV=1
Q9Y230	62	28	27		547710000	367080000	358790000	51157	RuvB-like 2 OS=Homo sapiens OX=9606 GN=RUVBL2 PE=1 SV=3
P58107	30	130	119	Oxidation (M); Acetylation (Protein N-term)	1133100000	776670000	758380000	555666	Epiplakin OS=Homo sapiens OX=9606 GN=EPPK1 PE=1 SV=3
P10155	21	8	8	Acetylation (Protein N-term)	17302000	24054000	23096000	60671	60 kDa SS-A/Ro ribonucleoprotein OS=Homo sapiens OX=9606 GN=RO60 PE=1 SV=2
Q5TEC6	21	7	2		178070000	68811000	79577000	15430	Histone HIST2H3PS2 OS=Homo sapiens OX=9606 GN=H3-2 PE=1 SV=1
O95573	44	26	23	Acetylation (Protein N-term)	109430000	98635000	147040000	80420	Long-chain-fatty-acid--CoA ligase 3 OS=Homo sapiens OX=9606 GN=ACSL3 PE=1 SV=3
Q5T8P6	7	6	5		8180500	14159000	21938000	113597	RNA-binding protein 26 OS=Homo sapiens OX=9606 GN=RBM26 PE=1 SV=3
Q96FQ6	68	8	8		62949000	94099000	62046000	11801	Protein S100-A16 OS=Homo sapiens OX=9606 GN=S100A16 PE=1 SV=1
P38646	54	52	47	Oxidation (M)	991570000	859990000	706440000	73681	Stress-70 protein mitochondrial OS=Homo sapiens OX=9606 GN=HSPA9 PE=1 SV=2
Q9BZQ8	3	2	2		409870	1489600	1874100	103135	Protein Niban 1 OS=Homo sapiens OX=9606 GN=NIBAN1 PE=1 SV=1
Q9Y3C4	19	2	2		3005000	1256100000	3309200	19661	EKC/KEOPS complex subunit TPRKB OS=Homo sapiens OX=9606 GN=TPRKB PE=1 SV=1
P52788	34	8	8		18853000	60545000	56412000	41268	Spermine synthase OS=Homo sapiens OX=9606 GN=SMS PE=1 SV=2
P05026	23	6	6		45233000	132190000	135540000	35061	Sodium/potassium-transporting ATPase subunit beta-1 OS=Homo sapiens OX=9606 GN=ATP1B1 PE=1 SV=1
Q9BY43	18	3	3		12233000	33604000	30297000	25098	Charged multivesicular body protein 4a OS=Homo sapiens OX=9606 GN=CHMP4A PE=1 SV=3
Q8NHQ9	36	12	11	Acetylation (Protein N-term)	5055900	21842000	6341700	68547	ATP-dependent RNA helicase DDX55 OS=Homo sapiens OX=9606 GN=DDX55 PE=1 SV=3
O43823	15	7	7		19493000	81521000	13429000	76108	A-kinase anchor protein 8 OS=Homo sapiens OX=9606 GN=AKAP8 PE=1 SV=1
Q6Y7W6	15	11	11	Acetylation (Protein N-term)	14022000	23734000	29975000	150070	GRB10-interacting GYF protein 2 OS=Homo sapiens OX=9606 GN=GIGYF2 PE=1 SV=1
Q14192	8	2	2		15600000	43541000	31481000	32193	Four and a half LIM domains protein 2 OS=Homo sapiens OX=9606 GN=FHL2 PE=1 SV=3
P49327	54	131	130	Oxidation (M); Acetylation (Protein N-term)	2011300000	3320900000	3087300000	273424	Fatty acid synthase OS=Homo sapiens OX=9606 GN=FASN PE=1 SV=3
O14562	27	5	5	Oxidation (M)	18553000	33208000	28321000	33382	Ubiquitin domain-containing protein UBFD1 OS=Homo sapiens OX=9606 GN=UBFD1 PE=1 SV=2
Q9UNE7	24	6	6		43191000	40099000	39328000	34856	E3 ubiquitin-protein ligase CHIP OS=Homo sapiens OX=9606 GN=STUB1 PE=1 SV=2
Q9UGP8	21	13	13		42283000	30334000	48738000	87997	Translocation protein SEC63 homolog OS=Homo sapiens OX=9606 GN=SEC63 PE=1 SV=2
Q16222	23	9	7		15275000	21354000	25045000	58769	UDP-N-acetylhexosamine pyrophosphorylase OS=Homo sapiens OX=9606 GN=UAP1 PE=1 SV=3
O94776	37	21	18		152400000	177250000	156460000	75023	Metastasis-associated protein MTA2 OS=Homo sapiens OX=9606 GN=MTA2 PE=1 SV=1
Q13442	33	8	8		86062000	188870000	195200000	20630	28 kDa heat- and acid-stable phosphoprotein OS=Homo sapiens OX=9606 GN=PDAP1 PE=1 SV=1
Q9NVS9	28	5	5		20637000	30250000	34343000	29988	Pyridoxine-5'-phosphate oxidase OS=Homo sapiens OX=9606 GN=PNPO PE=1 SV=1
P53992	24	17	17		69410000	160720000	151580000	118325	Protein transport protein Sec24C OS=Homo sapiens OX=9606 GN=SEC24C PE=1 SV=3
Q92530	10	2	2		4335900	3252600	10071000	29817	Proteasome inhibitor PI31 subunit OS=Homo sapiens OX=9606 GN=PSMF1 PE=1 SV=2
Q9UHG3	21	6	6		16276000	42911000	53300000	56640	Prenylcysteine oxidase 1 OS=Homo sapiens OX=9606 GN=PCYOX1 PE=1 SV=3
Q8NCF5	16	3	3		958960	2688800	2960500	45817	NFATC2-interacting protein OS=Homo sapiens OX=9606 GN=NFATC2IP PE=1 SV=1
P48643	60	42	40	Oxidation (M); Acetylation (Protein N-term)	662320000	1083900000	863160000	59671	T-complex protein 1 subunit epsilon OS=Homo sapiens OX=9606 GN=CCT5 PE=1 SV=1
Q9Y448	16	3	3		4097100	13088000	8807000	35438	Small kinetochore-associated protein OS=Homo sapiens OX=9606 GN=KNSTRN PE=1 SV=2
O14641	10	5	5		2906700	7617600	7608700	78948	Segment polarity protein dishevelled homolog DVL-2 OS=Homo sapiens OX=9606 GN=DVL2 PE=1 SV=1
Q9GZR7	44	30	30		98982000	167760000	201100000	96332	ATP-dependent RNA helicase DDX24 OS=Homo sapiens OX=9606 GN=DDX24 PE=1 SV=1
P11413	58	32	32	Acetylation (Protein N-term)	525060000	387090000	320330000	59257	Glucose-6-phosphate 1-dehydrogenase OS=Homo sapiens OX=9606 GN=G6PD PE=1 SV=4
P04083	65	32	32	Acetylation (Protein N-term)	1413600000	2121600000	2628200000	38714	Annexin A1 OS=Homo sapiens OX=9606 GN=ANXA1 PE=1 SV=2
Q01844	16	8	8		174380000	280970000	180320000	68478	RNA-binding protein EWS OS=Homo sapiens OX=9606 GN=EWSR1 PE=1 SV=1
O15294	12	8	8	Acetylation (Protein N-term)	18020000	21724000	30346000	116924	UDP-N-acetylglucosamine--peptide N-acetylglucosaminyltransferase 110 kDa subunit OS=Homo sapiens OX=9606 GN=OGT PE=1 SV=3
Q92878	10	10	10		13087000	17823000	18087000	153892	DNA repair protein RAD50 OS=Homo sapiens OX=9606 GN=RAD50 PE=1 SV=1
Q9BZX2	44	8	8	Acetylation (Protein N-term)	23047000	41294000	45933000	29299	Uridine-cytidine kinase 2 OS=Homo sapiens OX=9606 GN=UCK2 PE=1 SV=1
Q9UPP1	3	2	2		6848600	6366500	2018400	117864	Histone lysine demethylase PHF8 OS=Homo sapiens OX=9606 GN=PHF8 PE=1 SV=3
Q12933	14	4	4		1009200	4239300	3375800	55859	TNF receptor-associated factor 2 OS=Homo sapiens OX=9606 GN=TRAF2 PE=1 SV=2
Q9Y232	6	2	2		264090	264440	431220	66482	Chromodomain Y-like protein OS=Homo sapiens OX=9606 GN=CDYL PE=1 SV=2
Q92541	10	6	6		13751000	26865000	24463000	80314	RNA polymerase-associated protein RTF1 homolog OS=Homo sapiens OX=9606 GN=RTF1 PE=1 SV=4
Q92499	46	34	34	Carbamidomethylation	192320000	524900000	350220000	82432	ATP-dependent RNA helicase DDX1 OS=Homo sapiens OX=9606 GN=DDX1 PE=1 SV=2
Q9Y289	5	2	2		457820	1178300	2440400	68642	Sodium-dependent multivitamin transporter OS=Homo sapiens OX=9606 GN=SLC5A6 PE=1 SV=2
P12109	4	2	2		1605400	8078900	7223800	108529	Collagen alpha-1(VI) chain OS=Homo sapiens OX=9606 GN=COL6A1 PE=1 SV=3
Q9UBI1	12	2	2		774960	309950	1382200	22151	COMM domain-containing protein 3 OS=Homo sapiens OX=9606 GN=COMMD3 PE=1 SV=1
Q04726	10	6	6		6029900	5930800	5341700	83417	Transducin-like enhancer protein 3 OS=Homo sapiens OX=9606 GN=TLE3 PE=1 SV=2
Q5M775	15	8	8		9237300	3948600	6831500	118585	Cytospin-B OS=Homo sapiens OX=9606 GN=SPECC1 PE=1 SV=1
Q5T200	2	2	2		175310	140190000	57236	196635	Zinc finger CCCH domain-containing protein 13 OS=Homo sapiens OX=9606 GN=ZC3H13 PE=1 SV=1
Q9H6R0	7	3	3		16264000	5766300	6700900	78874	ATP-dependent RNA helicase DHX33 OS=Homo sapiens OX=9606 GN=DHX33 PE=1 SV=2
Q9UII2	31	4	4		60718000	41071000	25897000	12249	ATPase inhibitor mitochondrial OS=Homo sapiens OX=9606 GN=ATP5IF1 PE=1 SV=1
P61457	30	3	3		13321000	25404000	22446000	12000	Pterin-4-alpha-carbinolamine dehydratase OS=Homo sapiens OX=9606 GN=PCBD1 PE=1 SV=2
P21980	14	7	7		24418000	49040000	36008000	77329	Protein-glutamine gamma-glutamyltransferase 2 OS=Homo sapiens OX=9606 GN=TGM2 PE=1 SV=2
P83916	39	9	7	Oxidation (M)	51710000	75202000	50937000	21418	Chromobox protein homolog 1 OS=Homo sapiens OX=9606 GN=CBX1 PE=1 SV=1
Q8TB36	16	4	4		4728700	5469200	4921800	41346	Ganglioside-induced differentiation-associated protein 1 OS=Homo sapiens OX=9606 GN=GDAP1 PE=1 SV=3
P28838	21	8	8		46799000	34542000	17044000	56166	Cytosol aminopeptidase OS=Homo sapiens OX=9606 GN=LAP3 PE=1 SV=3
P56182	33	13	13		50861000	49602000	90864000	52839	Ribosomal RNA processing protein 1 homolog A OS=Homo sapiens OX=9606 GN=RRP1 PE=1 SV=1
Q969G5	6	1	1		1659700	7833600	7444500	27701	Caveolae-associated protein 3 OS=Homo sapiens OX=9606 GN=CAVIN3 PE=1 SV=3
P54886	43	29	29		398700000	243070000	216590000	87302	Delta-1-pyrroline-5-carboxylate synthase OS=Homo sapiens OX=9606 GN=ALDH18A1 PE=1 SV=2
Q8WWC4	13	3	3		26829000	23933000	38595000	32545	m-AAA protease-interacting protein 1 mitochondrial OS=Homo sapiens OX=9606 GN=MAIP1 PE=1 SV=1
O95373	24	25	25	Oxidation (M); Acetylation (Protein N-term)	162850000	249170000	293630000	119516	Importin-7 OS=Homo sapiens OX=9606 GN=IPO7 PE=1 SV=1
O14646	8	9	7		12371000	6861600	6680800	196687	Chromodomain-helicase-DNA-binding protein 1 OS=Homo sapiens OX=9606 GN=CHD1 PE=1 SV=2
P32754	20	7	7		22243000	49560000	36026000	44934	4-hydroxyphenylpyruvate dioxygenase OS=Homo sapiens OX=9606 GN=HPD PE=1 SV=2
Q92995	4	2	2		7720300	1663800	3208300	97327	Ubiquitin carboxyl-terminal hydrolase 13 OS=Homo sapiens OX=9606 GN=USP13 PE=1 SV=2
Q9UPU5	2	3	3		2712300	6508800	8324100	294364	Ubiquitin carboxyl-terminal hydrolase 24 OS=Homo sapiens OX=9606 GN=USP24 PE=1 SV=3
Q6L8Q7	10	3	3		8779600	7319700	22818000	67352	2' 5'-phosphodiesterase 12 OS=Homo sapiens OX=9606 GN=PDE12 PE=1 SV=2
Q7Z5L9	24	7	7	Acetylation (Protein N-term)	27221000	49233000	42655000	61025	Interferon regulatory factor 2-binding protein 2 OS=Homo sapiens OX=9606 GN=IRF2BP2 PE=1 SV=2
P11441	22	3	3		5210700	7381500	6282600	17776	Ubiquitin-like protein 4A OS=Homo sapiens OX=9606 GN=UBL4A PE=1 SV=1
P62917	44	19	19	Oxidation (M)	656690000	1021300000	759810000	28025	60S ribosomal protein L8 OS=Homo sapiens OX=9606 GN=RPL8 PE=1 SV=2
O75718	11	4	4		12052000	11120000	12144000	46562	Cartilage-associated protein OS=Homo sapiens OX=9606 GN=CRTAP PE=1 SV=1
P56556	40	4	4		78052000	52928000	80744000	15137	NADH dehydrogenase [ubiquinone] 1 alpha subcomplex subunit 6 OS=Homo sapiens OX=9606 GN=NDUFA6 PE=1 SV=4
Q9H2V7	6	2	2		2135700	1448600	524510	56630	Protein spinster homolog 1 OS=Homo sapiens OX=9606 GN=SPNS1 PE=1 SV=1
P47914	21	6	6		346440000	454580000	316630000	17752	60S ribosomal protein L29 OS=Homo sapiens OX=9606 GN=RPL29 PE=1 SV=2
P11216	16	12	7		14314000	23038000	29262000	96696	Glycogen phosphorylase brain form OS=Homo sapiens OX=9606 GN=PYGB PE=1 SV=5
Q9BRJ6	40	6	6		40385000	53372000	92512000	22083	Uncharacterized protein C7orf50 OS=Homo sapiens OX=9606 GN=C7orf50 PE=1 SV=1
O60427	24	7	7	Acetylation (Protein N-term)	3992800	7001400	7885000	51964	Acyl-CoA (8-3)-desaturase OS=Homo sapiens OX=9606 GN=FADS1 PE=1 SV=3
Q7RTV0	14	2	2		14848000	16599000	20483000	12405	PHD finger-like domain-containing protein 5A OS=Homo sapiens OX=9606 GN=PHF5A PE=1 SV=1
Q9H0W8	9	3	3	Acetylation (Protein N-term)	1175600	1271200	3249900	57651	Protein SMG9 OS=Homo sapiens OX=9606 GN=SMG9 PE=1 SV=1
P63165	35	3	3	Acetylation (Protein N-term)	48676000	72537000	46745000	11557	Small ubiquitin-related modifier 1 OS=Homo sapiens OX=9606 GN=SUMO1 PE=1 SV=1
Q9UIA9	7	6	6		11755000	27879000	22674000	123907	Exportin-7 OS=Homo sapiens OX=9606 GN=XPO7 PE=1 SV=3
Q9BSV6	9	2	2		6990200	991100	2920500	33652	tRNA-splicing endonuclease subunit Sen34 OS=Homo sapiens OX=9606 GN=TSEN34 PE=1 SV=1
Q02952	2	2	2		1141200	3959500	879390	191480	A-kinase anchor protein 12 OS=Homo sapiens OX=9606 GN=AKAP12 PE=1 SV=4
Q13404	50	7	2		59148000	55919000	51182000	16495	Ubiquitin-conjugating enzyme E2 variant 1 OS=Homo sapiens OX=9606 GN=UBE2V1 PE=1 SV=2
O15226	20	11	11		19716000	47159000	46732000	77673	NF-kappa-B-repressing factor OS=Homo sapiens OX=9606 GN=NKRF PE=1 SV=2
Q9H7E9	17	4	4		20166000	25007000	15424000	24992	UPF0488 protein C8orf33 OS=Homo sapiens OX=9606 GN=C8orf33 PE=1 SV=1
O60313	30	24	24		136330000	250040000	141530000	111630	Dynamin-like 120 kDa protein mitochondrial OS=Homo sapiens OX=9606 GN=OPA1 PE=1 SV=3
Q04837	64	9	9		93834000	168990000	134310000	17260	Single-stranded DNA-binding protein mitochondrial OS=Homo sapiens OX=9606 GN=SSBP1 PE=1 SV=1
Q9Y3C8	16	3	3		19500000	32632000	27092000	19458	Ubiquitin-fold modifier-conjugating enzyme 1 OS=Homo sapiens OX=9606 GN=UFC1 PE=1 SV=3
Q8NBF2	8	4	4		14944000	22805000	18565000	79444	NHL repeat-containing protein 2 OS=Homo sapiens OX=9606 GN=NHLRC2 PE=1 SV=1
P62701	70	34	34	Oxidation (M)	1194600000	1767200000	1375700000	29598	40S ribosomal protein S4 X isoform OS=Homo sapiens OX=9606 GN=RPS4X PE=1 SV=2
P52735	9	5	5		12708000	7134500	8218200	101289	Guanine nucleotide exchange factor VAV2 OS=Homo sapiens OX=9606 GN=VAV2 PE=1 SV=2
Q9BX40	21	3	3		3230800	14061000	3134800	42071	Protein LSM14 homolog B OS=Homo sapiens OX=9606 GN=LSM14B PE=1 SV=1
Q9Y617	36	12	12		107450000	55058000	42228000	40423	Phosphoserine aminotransferase OS=Homo sapiens OX=9606 GN=PSAT1 PE=1 SV=2
P56385	57	5	5		116870000	44620000	30593000	7933	ATP synthase subunit e mitochondrial OS=Homo sapiens OX=9606 GN=ATP5ME PE=1 SV=2
P62266	40	9	9		176080000	419300000	345790000	15808	40S ribosomal protein S23 OS=Homo sapiens OX=9606 GN=RPS23 PE=1 SV=3
P61956	27	3	2		67246000	112370000	80727000	10871	Small ubiquitin-related modifier 2 OS=Homo sapiens OX=9606 GN=SUMO2 PE=1 SV=3
P62877	18	2	2	Acetylation (Protein N-term)	25672000	45396000	40153000	12274	E3 ubiquitin-protein ligase RBX1 OS=Homo sapiens OX=9606 GN=RBX1 PE=1 SV=1
P67809	74	28	22	Oxidation (M); Acetylation (Protein N-term)	834360000	1313300000	1162100000	35924	Y-box-binding protein 1 OS=Homo sapiens OX=9606 GN=YBX1 PE=1 SV=3
P30622	14	16	15		23871000	62917000	55519000	162246	CAP-Gly domain-containing linker protein 1 OS=Homo sapiens OX=9606 GN=CLIP1 PE=1 SV=2
P16989	67	20	14	Acetylation (Protein N-term)	161990000	200420000	201710000	40090	Y-box-binding protein 3 OS=Homo sapiens OX=9606 GN=YBX3 PE=1 SV=4
P82663	23	4	4		7424300	2534300	2054600	20116	28S ribosomal protein S25 mitochondrial OS=Homo sapiens OX=9606 GN=MRPS25 PE=1 SV=1
Q13243	26	6	5		61482000	87300000	58981000	31264	Serine/arginine-rich splicing factor 5 OS=Homo sapiens OX=9606 GN=SRSF5 PE=1 SV=1
Q9NQS7	7	4	4		38586000	16960000	14055000	105429	Inner centromere protein OS=Homo sapiens OX=9606 GN=INCENP PE=1 SV=3
P53582	28	6	6		14956000	89037000	62525000	43215	Methionine aminopeptidase 1 OS=Homo sapiens OX=9606 GN=METAP1 PE=1 SV=2
Q13257	16	3	3		7469200	4768900	2588600	23510	Mitotic spindle assembly checkpoint protein MAD2A OS=Homo sapiens OX=9606 GN=MAD2L1 PE=1 SV=1
Q8TCT9	15	7	7		47816000	39223000	34789000	41488	Minor histocompatibility antigen H13 OS=Homo sapiens OX=9606 GN=HM13 PE=1 SV=1
Q6UXV4	25	4	4		5265800	16139000	23062000	29159	MICOS complex subunit MIC27 OS=Homo sapiens OX=9606 GN=APOOL PE=1 SV=1
P62310	40	3	3	Acetylation (Protein N-term)	20168000	39564000	48091000	11845	U6 snRNA-associated Sm-like protein LSm3 OS=Homo sapiens OX=9606 GN=LSM3 PE=1 SV=2
P84098	29	15	15	Oxidation (M)	348810000	643660000	594640000	23466	60S ribosomal protein L19 OS=Homo sapiens OX=9606 GN=RPL19 PE=1 SV=1
O43251	9	2	2		4649400	886930	6516300	41374	RNA binding protein fox-1 homolog 2 OS=Homo sapiens OX=9606 GN=RBFOX2 PE=1 SV=3
O43808	10	2	2		24755000	1709900	5631500	34567	Peroxisomal membrane protein PMP34 OS=Homo sapiens OX=9606 GN=SLC25A17 PE=1 SV=1
Q9UNF0	14	6	6		29131000	89491000	62944000	55739	Protein kinase C and casein kinase substrate in neurons protein 2 OS=Homo sapiens OX=9606 GN=PACSIN2 PE=1 SV=2
Q86WA6	10	2	2		2952800	3373400	9538900	32543	Valacyclovir hydrolase OS=Homo sapiens OX=9606 GN=BPHL PE=1 SV=1
Q00534	21	5	4		3217900	8734900	13568000	36938	Cyclin-dependent kinase 6 OS=Homo sapiens OX=9606 GN=CDK6 PE=1 SV=1
P35080	30	4	4		45336000	92836000	87999000	15046	Profilin-2 OS=Homo sapiens OX=9606 GN=PFN2 PE=1 SV=3
O75391	16	3	3		10062000	21861000	21608000	26034	Sperm-associated antigen 7 OS=Homo sapiens OX=9606 GN=SPAG7 PE=1 SV=2
Q9UKK9	45	10	10	Acetylation (Protein N-term)	63991000	71744000	49670000	24328	ADP-sugar pyrophosphatase OS=Homo sapiens OX=9606 GN=NUDT5 PE=1 SV=1
P36507	32	9	7		20197000	44859000	47336000	44424	Dual specificity mitogen-activated protein kinase kinase 2 OS=Homo sapiens OX=9606 GN=MAP2K2 PE=1 SV=1
O00264	52	11	11		72497000	129350000	106940000	21671	Membrane-associated progesterone receptor component 1 OS=Homo sapiens OX=9606 GN=PGRMC1 PE=1 SV=3
Q9NVF7	10	2	2		94246	629950	463610	41149	F-box only protein 28 OS=Homo sapiens OX=9606 GN=FBXO28 PE=1 SV=1
O60763	28	19	19		39454000	65850000	64452000	107895	General vesicular transport factor p115 OS=Homo sapiens OX=9606 GN=USO1 PE=1 SV=2
P55145	18	4	4		12341000	29370000	23884000	20700	Mesencephalic astrocyte-derived neurotrophic factor OS=Homo sapiens OX=9606 GN=MANF PE=1 SV=3
Q8IXK0	6	3	2		18389000	1042200	3133600	90713	Polyhomeotic-like protein 2 OS=Homo sapiens OX=9606 GN=PHC2 PE=1 SV=1
O95785	3	3	3		4074600	8893400	11275000	178673	Protein Wiz OS=Homo sapiens OX=9606 GN=WIZ PE=1 SV=2
Q15061	16	7	7		38068000	95541000	73627000	74891	WD repeat-containing protein 43 OS=Homo sapiens OX=9606 GN=WDR43 PE=1 SV=3
Q96K17	63	7	6		38419000	33721000	51013000	17271	Transcription factor BTF3 homolog 4 OS=Homo sapiens OX=9606 GN=BTF3L4 PE=1 SV=1
P33176	45	33	33	Oxidation (M)	131540000	271790000	226990000	109685	Kinesin-1 heavy chain OS=Homo sapiens OX=9606 GN=KIF5B PE=1 SV=1
O95757	31	19	15	Oxidation (M)	47515000	84513000	96175000	94512	Heat shock 70 kDa protein 4L OS=Homo sapiens OX=9606 GN=HSPA4L PE=1 SV=3
P12270	46	89	89	Acetylation (Protein N-term)	411510000	507530000	478330000	267290	Nucleoprotein TPR OS=Homo sapiens OX=9606 GN=TPR PE=1 SV=3
Q5VYK3	19	24	24		51605000	79841000	91217000	204289	Proteasome adapter and scaffold protein ECM29 OS=Homo sapiens OX=9606 GN=ECPAS PE=1 SV=2
Q13630	23	5	5		30143000	45933000	41084000	35893	GDP-L-fucose synthase OS=Homo sapiens OX=9606 GN=GFUS PE=1 SV=1
O60678	10	4	4		5259400	3775800	9944400	59903	Protein arginine N-methyltransferase 3 OS=Homo sapiens OX=9606 GN=PRMT3 PE=1 SV=4
Q92922	29	23	18	Oxidation (M); Acetylation (Protein N-term)	54831000	63742000	69008000	122867	SWI/SNF complex subunit SMARCC1 OS=Homo sapiens OX=9606 GN=SMARCC1 PE=1 SV=3
Q9NWV8	19	3	3	Acetylation (Protein N-term)	10927000	4599700	6045400	36560	BRISC and BRCA1-A complex member 1 OS=Homo sapiens OX=9606 GN=BABAM1 PE=1 SV=1
Q10471	35	20	20		119240000	216390000	187120000	64733	Polypeptide N-acetylgalactosaminyltransferase 2 OS=Homo sapiens OX=9606 GN=GALNT2 PE=1 SV=1
P62854	40	4	4		183360000	358510000	380410000	13015	40S ribosomal protein S26 OS=Homo sapiens OX=9606 GN=RPS26 PE=1 SV=3
P49902	6	2	2		1913700	9031200	6671000	64970	Cytosolic purine 5'-nucleotidase OS=Homo sapiens OX=9606 GN=NT5C2 PE=1 SV=1
Q8NC60	7	2	2		808730	611110	2496100	78458	Nitric oxide-associated protein 1 OS=Homo sapiens OX=9606 GN=NOA1 PE=1 SV=2
P50991	57	35	34	Oxidation (M)	643600000	980990000	952090000	57924	T-complex protein 1 subunit delta OS=Homo sapiens OX=9606 GN=CCT4 PE=1 SV=4
O60506	58	42	34	Carbamidomethylation; Acetylation (Protein N-term)	582530000	642040000	719690000	69603	Heterogeneous nuclear ribonucleoprotein Q OS=Homo sapiens OX=9606 GN=SYNCRIP PE=1 SV=2
P0C0S5	45	13	9		484860000	747530000	921580000	13553	Histone H2A.Z OS=Homo sapiens OX=9606 GN=H2AZ1 PE=1 SV=2
Q71UI9	45	13	9		484860000	747530000	921580000	13509	Histone H2A.V OS=Homo sapiens OX=9606 GN=H2AZ2 PE=1 SV=3
P61204	65	13	7	Oxidation (M)	233860000	334880000	309900000	20601	ADP-ribosylation factor 3 OS=Homo sapiens OX=9606 GN=ARF3 PE=1 SV=2
P84077	65	13	7	Oxidation (M)	233860000	334880000	309900000	20697	ADP-ribosylation factor 1 OS=Homo sapiens OX=9606 GN=ARF1 PE=1 SV=2
P61019	57	12	12		114580000	165220000	171430000	23546	Ras-related protein Rab-2A OS=Homo sapiens OX=9606 GN=RAB2A PE=1 SV=1
Q9H2G2	8	6	6		10148000	17381000	14947000	142695	STE20-like serine/threonine-protein kinase OS=Homo sapiens OX=9606 GN=SLK PE=1 SV=1
P24666	38	5	5		60081000	148480000	125300000	18042	Low molecular weight phosphotyrosine protein phosphatase OS=Homo sapiens OX=9606 GN=ACP1 PE=1 SV=3
Q14155	4	2	2	Oxidation (M)	271260	0	282190	90012	Rho guanine nucleotide exchange factor 7 OS=Homo sapiens OX=9606 GN=ARHGEF7 PE=1 SV=2
Q14197	17	3	3		31935000	86658000	77242000	23630	Peptidyl-tRNA hydrolase ICT1 mitochondrial OS=Homo sapiens OX=9606 GN=MRPL58 PE=1 SV=1
Q9NV56	20	2	2		1088600	518460	1487200	22417	MRG/MORF4L-binding protein OS=Homo sapiens OX=9606 GN=MRGBP PE=1 SV=1
Q9Y5Y0	5	2	2		1549900	4002700	6176400	59863	Feline leukemia virus subgroup C receptor-related protein 1 OS=Homo sapiens OX=9606 GN=FLVCR1 PE=1 SV=1
P16383	5	2	2		407000	5953300	629530	89385	Intron Large complex component GCFC2 OS=Homo sapiens OX=9606 GN=GCFC2 PE=1 SV=2
Q9BY32	15	2	2		8639200	51675000	47102000	21446	Inosine triphosphate pyrophosphatase OS=Homo sapiens OX=9606 GN=ITPA PE=1 SV=2
Q9NX18	16	2	2		1348700	0	554770	19599	Succinate dehydrogenase assembly factor 2 mitochondrial OS=Homo sapiens OX=9606 GN=SDHAF2 PE=1 SV=1
Q14126	30	17	17		31834000	42892000	220270000	122294	Desmoglein-2 OS=Homo sapiens OX=9606 GN=DSG2 PE=1 SV=2
Q02750	15	5	3		12398000	30276000	27728000	43439	Dual specificity mitogen-activated protein kinase kinase 1 OS=Homo sapiens OX=9606 GN=MAP2K1 PE=1 SV=2
P30837	24	8	7		39352000	44229000	68112000	57206	Aldehyde dehydrogenase X mitochondrial OS=Homo sapiens OX=9606 GN=ALDH1B1 PE=1 SV=3
Q96K58	6	2	2		339260	5143200	3205300	67890	Zinc finger protein 668 OS=Homo sapiens OX=9606 GN=ZNF668 PE=1 SV=3
Q15067	23	10	10		29066000	13260000	24411000	74424	Peroxisomal acyl-coenzyme A oxidase 1 OS=Homo sapiens OX=9606 GN=ACOX1 PE=1 SV=3
Q9P265	9	9	9		6661500	30417000	25247000	171491	Disco-interacting protein 2 homolog B OS=Homo sapiens OX=9606 GN=DIP2B PE=1 SV=3
Q13185	46	9	7	Carbamidomethylation; Oxidation (M)	181690000	413420000	398760000	20811	Chromobox protein homolog 3 OS=Homo sapiens OX=9606 GN=CBX3 PE=1 SV=4
Q9UKM9	37	12	11	Acetylation (Protein N-term)	106210000	154770000	130580000	32463	RNA-binding protein Raly OS=Homo sapiens OX=9606 GN=RALY PE=1 SV=1
Q6P2Q9	52	110	110	Oxidation (M); Acetylation (Protein N-term)	726240000	703740000	785560000	273599	Pre-mRNA-processing-splicing factor 8 OS=Homo sapiens OX=9606 GN=PRPF8 PE=1 SV=2
O75448	3	2	2		0	0	153520	110305	Mediator of RNA polymerase II transcription subunit 24 OS=Homo sapiens OX=9606 GN=MED24 PE=1 SV=1
Q9NW08	4	2	2	Acetylation (Protein N-term)	0	0	186300	127785	DNA-directed RNA polymerase III subunit RPC2 OS=Homo sapiens OX=9606 GN=POLR3B PE=1 SV=2
P35908	59	27	17		128440000	108790000	134720000	65433	Keratin type II cytoskeletal 2 epidermal OS=Homo sapiens OX=9606 GN=KRT2 PE=1 SV=2
P52434	41	5	5	Acetylation (Protein N-term)	36942000	54636000	42900000	17143	DNA-directed RNA polymerases I II and III subunit RPABC3 OS=Homo sapiens OX=9606 GN=POLR2H PE=1 SV=4
Q9Y3A5	43	13	13		94891000	207570000	138640000	28764	Ribosome maturation protein SBDS OS=Homo sapiens OX=9606 GN=SBDS PE=1 SV=4
Q9HCE1	26	18	18		78948000	188660000	92059000	113671	Helicase MOV-10 OS=Homo sapiens OX=9606 GN=MOV10 PE=1 SV=2
P61020	47	9	4		15374000	27009000	35152000	23707	Ras-related protein Rab-5B OS=Homo sapiens OX=9606 GN=RAB5B PE=1 SV=1
O15213	27	12	11	Acetylation (Protein N-term)	96522000	184610000	121590000	68071	WD repeat-containing protein 46 OS=Homo sapiens OX=9606 GN=WDR46 PE=1 SV=3
Q12906	65	61	53		679300000	693390000	672150000	95339	Interleukin enhancer-binding factor 3 OS=Homo sapiens OX=9606 GN=ILF3 PE=1 SV=3
Q15154	3	5	4		103570000	5373300	6546700	228542	Pericentriolar material 1 protein OS=Homo sapiens OX=9606 GN=PCM1 PE=1 SV=5
Q96A26	40	7	7	Oxidation (M)	94367000	40681000	32280000	17342	Protein FAM162A OS=Homo sapiens OX=9606 GN=FAM162A PE=1 SV=2
Q9H479	17	4	4		5576100	12842000	13108000	35171	Fructosamine-3-kinase OS=Homo sapiens OX=9606 GN=FN3K PE=1 SV=1
O94966	4	2	2		0	2747600	2872200	145650	Ubiquitin carboxyl-terminal hydrolase 19 OS=Homo sapiens OX=9606 GN=USP19 PE=1 SV=2
Q15008	37	14	14		115670000	159030000	169250000	45531	26S proteasome non-ATPase regulatory subunit 6 OS=Homo sapiens OX=9606 GN=PSMD6 PE=1 SV=1
Q7Z4H7	2	2	2		203700	2207100	5851500	108621	HAUS augmin-like complex subunit 6 OS=Homo sapiens OX=9606 GN=HAUS6 PE=1 SV=2
Q9BUQ8	39	28	28		114350000	206830000	180820000	95583	Probable ATP-dependent RNA helicase DDX23 OS=Homo sapiens OX=9606 GN=DDX23 PE=1 SV=3
P21926	4	1	1		17298000	10953000	4965200	25416	CD9 antigen OS=Homo sapiens OX=9606 GN=CD9 PE=1 SV=4
Q96CW5	9	5	5		6124000	16411000	6170000	103571	Gamma-tubulin complex component 3 OS=Homo sapiens OX=9606 GN=TUBGCP3 PE=1 SV=2
P15559	42	17	17		438790000	387120000	352700000	30868	NAD(P)H dehydrogenase [quinone] 1 OS=Homo sapiens OX=9606 GN=NQO1 PE=1 SV=1
P01130	4	2	2		351980	2512200	11287000	95376	Low-density lipoprotein receptor OS=Homo sapiens OX=9606 GN=LDLR PE=1 SV=1
Q03701	33	30	30	Acetylation (Protein N-term)	105230000	104000000	83838000	120974	CCAAT/enhancer-binding protein zeta OS=Homo sapiens OX=9606 GN=CEBPZ PE=1 SV=3
Q01085	27	9	5		16619000	27334000	19391000	41591	Nucleolysin TIAR OS=Homo sapiens OX=9606 GN=TIAL1 PE=1 SV=1
A0MZ66	23	10	10		29884000	57302000	53432000	71640	Shootin-1 OS=Homo sapiens OX=9606 GN=SHTN1 PE=1 SV=4
O00186	9	4	4		2505200	5761400	6762700	67764	Syntaxin-binding protein 3 OS=Homo sapiens OX=9606 GN=STXBP3 PE=1 SV=2
Q9H488	9	2	2		3878900	3133700	4944300	43956	GDP-fucose protein O-fucosyltransferase 1 OS=Homo sapiens OX=9606 GN=POFUT1 PE=1 SV=1
O15371	32	16	16		158820000	159120000	200840000	63973	Eukaryotic translation initiation factor 3 subunit D OS=Homo sapiens OX=9606 GN=EIF3D PE=1 SV=1
Q8WUM4	47	37	36		273870000	490970000	467450000	96023	Programmed cell death 6-interacting protein OS=Homo sapiens OX=9606 GN=PDCD6IP PE=1 SV=1
O60499	12	2	2		9087500	21257000	37523000	28114	Syntaxin-10 OS=Homo sapiens OX=9606 GN=STX10 PE=1 SV=1
Q96D46	17	9	9	Acetylation (Protein N-term)	53155000	36740000	35060000	57603	60S ribosomal export protein NMD3 OS=Homo sapiens OX=9606 GN=NMD3 PE=1 SV=1
Q92887	3	2	2		431890	813430	1053400	174206	ATP-binding cassette sub-family C member 2 OS=Homo sapiens OX=9606 GN=ABCC2 PE=1 SV=3
P61981	53	20	12	Oxidation (M); Acetylation (Protein N-term)	413810000	550410000	428010000	28303	14-3-3 protein gamma OS=Homo sapiens OX=9606 GN=YWHAG PE=1 SV=2
O75746	20	8	6		6125000	85964000	4900300	74762	Calcium-binding mitochondrial carrier protein Aralar1 OS=Homo sapiens OX=9606 GN=SLC25A12 PE=1 SV=2
O15372	57	17	17		114960000	185170000	195660000	39930	Eukaryotic translation initiation factor 3 subunit H OS=Homo sapiens OX=9606 GN=EIF3H PE=1 SV=1
P11802	53	11	10		33784000	60842000	52283000	33730	Cyclin-dependent kinase 4 OS=Homo sapiens OX=9606 GN=CDK4 PE=1 SV=2
Q9Y3B8	19	3	3		1807200	1875400	3291500	26833	Oligoribonuclease mitochondrial OS=Homo sapiens OX=9606 GN=REXO2 PE=1 SV=3
Q92604	10	3	3		787070	1238600	3012600	43089	Acyl-CoA:lysophosphatidylglycerol acyltransferase 1 OS=Homo sapiens OX=9606 GN=LPGAT1 PE=1 SV=1
Q96EI5	12	2	2		2094400	6758800	2361200	24647	Transcription elongation factor A protein-like 4 OS=Homo sapiens OX=9606 GN=TCEAL4 PE=1 SV=2
Q9Y315	27	6	6		9235100	15394000	19018000	35231	Deoxyribose-phosphate aldolase OS=Homo sapiens OX=9606 GN=DERA PE=1 SV=2
O95400	23	5	5		31997000	28257000	46147000	37646	CD2 antigen cytoplasmic tail-binding protein 2 OS=Homo sapiens OX=9606 GN=CD2BP2 PE=1 SV=1
L0R6Q1	40	3	3		4924900	14517000	10902000	11133	SLC35A4 upstream open reading frame protein OS=Homo sapiens OX=9606 GN=SLC35A4 PE=3 SV=1
Q96HE7	24	10	10		21197000	48260000	41659000	54393	ERO1-like protein alpha OS=Homo sapiens OX=9606 GN=ERO1A PE=1 SV=2
O75152	13	7	7		11077000	213240000	11054000	89131	Zinc finger CCCH domain-containing protein 11A OS=Homo sapiens OX=9606 GN=ZC3H11A PE=1 SV=3
Q9HB71	59	15	15	Oxidation (M); Acetylation (Protein N-term)	308990000	608310000	634620000	26210	Calcyclin-binding protein OS=Homo sapiens OX=9606 GN=CACYBP PE=1 SV=2
P20674	76	14	14		388430000	1513800000	264920000	16762	Cytochrome c oxidase subunit 5A mitochondrial OS=Homo sapiens OX=9606 GN=COX5A PE=1 SV=2
Q9UGY1	19	2	2		157140	1054200	3433000	24663	Nucleolar protein 12 OS=Homo sapiens OX=9606 GN=NOL12 PE=1 SV=1
P54725	37	7	4		20614000	10937000	7869900	39609	UV excision repair protein RAD23 homolog A OS=Homo sapiens OX=9606 GN=RAD23A PE=1 SV=1
P42285	35	31	30	Acetylation (Protein N-term)	111240000	205320000	184990000	117805	Exosome RNA helicase MTR4 OS=Homo sapiens OX=9606 GN=MTREX PE=1 SV=3
Q6UVK1	9	10	10		13409000	10386000	18088000	250534	Chondroitin sulfate proteoglycan 4 OS=Homo sapiens OX=9606 GN=CSPG4 PE=1 SV=2
Q12792	41	13	13	Acetylation (Protein N-term)	74020000	107230000	109640000	40283	Twinfilin-1 OS=Homo sapiens OX=9606 GN=TWF1 PE=1 SV=3
P29401	54	49	49	Oxidation (M); Acetylation (Protein N-term)	5289700000	1009500000	853500000	67878	Transketolase OS=Homo sapiens OX=9606 GN=TKT PE=1 SV=3
P15311	56	44	26	Oxidation (M)	495960000	859790000	767080000	69413	Ezrin OS=Homo sapiens OX=9606 GN=EZR PE=1 SV=4
O14976	6	4	4		1038000	1095900	1480900	143190	Cyclin-G-associated kinase OS=Homo sapiens OX=9606 GN=GAK PE=1 SV=2
Q9NR33	56	4	4	Acetylation (Protein N-term)	8598400	21838000	14364000	12209	DNA polymerase epsilon subunit 4 OS=Homo sapiens OX=9606 GN=POLE4 PE=1 SV=2
Q99460	39	30	30	Oxidation (M)	184250000	262360000	342250000	105836	26S proteasome non-ATPase regulatory subunit 1 OS=Homo sapiens OX=9606 GN=PSMD1 PE=1 SV=2
O00291	5	2	2		0	680380	1312900	116221	Huntingtin-interacting protein 1 OS=Homo sapiens OX=9606 GN=HIP1 PE=1 SV=5
Q9NV70	4	2	2		1046600	1265800	0	101982	Exocyst complex component 1 OS=Homo sapiens OX=9606 GN=EXOC1 PE=1 SV=4
Q9BV40	45	5	5	Acetylation (Protein N-term)	44922000	33584000	21683000	11438	Vesicle-associated membrane protein 8 OS=Homo sapiens OX=9606 GN=VAMP8 PE=1 SV=1
Q08211	49	66	66	Oxidation (M)	1220100000	1796100000	1493300000	140958	ATP-dependent RNA helicase A OS=Homo sapiens OX=9606 GN=DHX9 PE=1 SV=4
Q15056	54	16	16	Oxidation (M); Acetylation (Protein N-term)	259480000	500020000	457910000	27385	Eukaryotic translation initiation factor 4H OS=Homo sapiens OX=9606 GN=EIF4H PE=1 SV=5
P49321	58	38	38	Acetylation (Protein N-term)	417250000	322990000	306880000	85238	Nuclear autoantigenic sperm protein OS=Homo sapiens OX=9606 GN=NASP PE=1 SV=2
Q9NRR5	19	6	3		1012900	3242900	2634500	63853	Ubiquilin-4 OS=Homo sapiens OX=9606 GN=UBQLN4 PE=1 SV=2
P18074	5	2	2		4121900	1636900	5282900	86909	General transcription and DNA repair factor IIH helicase subunit XPD OS=Homo sapiens OX=9606 GN=ERCC2 PE=1 SV=1
Q9NRN7	8	2	2		1528900	11613000	8259600	35776	L-aminoadipate-semialdehyde dehydrogenase-phosphopantetheinyl transferase OS=Homo sapiens OX=9606 GN=AASDHPPT PE=1 SV=2
O75676	5	3	2		838680	2030000	56384000	85606	Ribosomal protein S6 kinase alpha-4 OS=Homo sapiens OX=9606 GN=RPS6KA4 PE=1 SV=1
P17275	9	2	2		0	561560	0	35879	Transcription factor jun-B OS=Homo sapiens OX=9606 GN=JUNB PE=1 SV=1
P17931	37	9	9		232560000	292690000	311400000	26152	Galectin-3 OS=Homo sapiens OX=9606 GN=LGALS3 PE=1 SV=5
Q7Z4V5	21	12	9		19672000	41972000	32331000	74317	Hepatoma-derived growth factor-related protein 2 OS=Homo sapiens OX=9606 GN=HDGFL2 PE=1 SV=1
P35606	35	25	25		114300000	181060000	185020000	102487	Coatomer subunit beta' OS=Homo sapiens OX=9606 GN=COPB2 PE=1 SV=2
Q14527	29	20	20		103220000	116370000	152460000	113928	Helicase-like transcription factor OS=Homo sapiens OX=9606 GN=HLTF PE=1 SV=2
P07947	18	6	5		26332000	12457000	24748000	60801	Tyrosine-protein kinase Yes OS=Homo sapiens OX=9606 GN=YES1 PE=1 SV=3
O60231	15	13	13		32277000	27350000	43213000	119263	Pre-mRNA-splicing factor ATP-dependent RNA helicase DHX16 OS=Homo sapiens OX=9606 GN=DHX16 PE=1 SV=2
P14314	34	18	18		186150000	261340000	235870000	59426	Glucosidase 2 subunit beta OS=Homo sapiens OX=9606 GN=PRKCSH PE=1 SV=2
Q9NX24	25	3	3		17949000	23139000	27281000	17201	H/ACA ribonucleoprotein complex subunit 2 OS=Homo sapiens OX=9606 GN=NHP2 PE=1 SV=1
O95219	5	2	2		917730	3308500	1434400	51909	Sorting nexin-4 OS=Homo sapiens OX=9606 GN=SNX4 PE=1 SV=1
Q9Y606	14	4	4		5030400	2304400	4568000	47470	tRNA pseudouridine synthase A OS=Homo sapiens OX=9606 GN=PUS1 PE=1 SV=3
P46778	43	14	14	Oxidation (M)	521040000	496700000	396520000	18565	60S ribosomal protein L21 OS=Homo sapiens OX=9606 GN=RPL21 PE=1 SV=2
Q14980	42	71	70		397440000	438050000	381000000	238257	Nuclear mitotic apparatus protein 1 OS=Homo sapiens OX=9606 GN=NUMA1 PE=1 SV=2
Q96D15	12	3	3		2241700	3100900	4583600	37493	Reticulocalbin-3 OS=Homo sapiens OX=9606 GN=RCN3 PE=1 SV=1
P62081	73	30	30	Oxidation (M)	312130000	571420000	527500000	22127	40S ribosomal protein S7 OS=Homo sapiens OX=9606 GN=RPS7 PE=1 SV=1
Q13423	28	20	20		95043000	57619000	91823000	113895	NAD(P) transhydrogenase mitochondrial OS=Homo sapiens OX=9606 GN=NNT PE=1 SV=3
Q8N4V1	43	3	3		9123300	6506400	7868200	14686	ER membrane protein complex subunit 5 OS=Homo sapiens OX=9606 GN=MMGT1 PE=1 SV=1
Q8WUH6	38	3	3		5838000	16655000	11805000	11748	Transmembrane protein 263 OS=Homo sapiens OX=9606 GN=TMEM263 PE=1 SV=1
P19971	16	4	4	Acetylation (Protein N-term)	4827200	4050700	5053600	49956	Thymidine phosphorylase OS=Homo sapiens OX=9606 GN=TYMP PE=1 SV=2
P37108	66	10	10		143120000	152360000	106600000	14570	Signal recognition particle 14 kDa protein OS=Homo sapiens OX=9606 GN=SRP14 PE=1 SV=2
Q99497	75	17	17	Oxidation (M)	668910000	481110000	471520000	19891	Parkinson disease protein 7 OS=Homo sapiens OX=9606 GN=PARK7 PE=1 SV=2
P36871	56	23	23	Oxidation (M)	173590000	250780000	206480000	61449	Phosphoglucomutase-1 OS=Homo sapiens OX=9606 GN=PGM1 PE=1 SV=3
Q8NEF9	7	2	2		8016700	15131000	12357000	48634	Serum response factor-binding protein 1 OS=Homo sapiens OX=9606 GN=SRFBP1 PE=1 SV=1
O15305	38	9	9		63503000	76441000	75993000	28082	Phosphomannomutase 2 OS=Homo sapiens OX=9606 GN=PMM2 PE=1 SV=1
Q53HC9	7	2	2	Acetylation (Protein N-term)	801980	3249800	3126500	43603	EARP and GARP complex-interacting protein 1 OS=Homo sapiens OX=9606 GN=EIPR1 PE=1 SV=2
Q9UI09	37	4	4	Acetylation (Protein N-term)	5821900	4603400	9916600	17114	NADH dehydrogenase [ubiquinone] 1 alpha subcomplex subunit 12 OS=Homo sapiens OX=9606 GN=NDUFA12 PE=1 SV=1
P17980	65	29	29	Oxidation (M); Acetylation (Protein N-term)	204410000	277960000	293240000	49204	26S proteasome regulatory subunit 6A OS=Homo sapiens OX=9606 GN=PSMC3 PE=1 SV=3
Q9Y2P8	19	6	6		13528000	13827000	8780400	40843	RNA 3'-terminal phosphate cyclase-like protein OS=Homo sapiens OX=9606 GN=RCL1 PE=1 SV=3
P42695	5	5	5		9976300	26291000	24283000	168890	Condensin-2 complex subunit D3 OS=Homo sapiens OX=9606 GN=NCAPD3 PE=1 SV=2
Q14008	17	27	27	Acetylation (Protein N-term)	253730000	58608000	61065000	225493	Cytoskeleton-associated protein 5 OS=Homo sapiens OX=9606 GN=CKAP5 PE=1 SV=3
O00178	22	8	8		9060700	17905000	9570900	72454	GTP-binding protein 1 OS=Homo sapiens OX=9606 GN=GTPBP1 PE=1 SV=3
Q6P6C2	10	3	3	Acetylation (Protein N-term)	14441000	13777000	10723000	44256	RNA demethylase ALKBH5 OS=Homo sapiens OX=9606 GN=ALKBH5 PE=1 SV=2
Q9H840	10	1	1	Oxidation (M); Acetylation (Protein N-term)	13188000	3730800	3141200	14537	Gem-associated protein 7 OS=Homo sapiens OX=9606 GN=GEMIN7 PE=1 SV=1
O00255	4	2	2		6369700	4020300	25277000	68023	Menin OS=Homo sapiens OX=9606 GN=MEN1 PE=1 SV=4
Q9UKY7	72	13	13		75171000	195060000	176800000	27335	Protein CDV3 homolog OS=Homo sapiens OX=9606 GN=CDV3 PE=1 SV=1
Q9H0B6	15	6	3		2785000	7253900	5164300	68935	Kinesin light chain 2 OS=Homo sapiens OX=9606 GN=KLC2 PE=1 SV=1
Q96S55	3	2	2		2975400	6217800	2182900	72133	ATPase WRNIP1 OS=Homo sapiens OX=9606 GN=WRNIP1 PE=1 SV=2
P26358	16	22	22		48147000	72986000	101380000	183164	DNA (cytosine-5)-methyltransferase 1 OS=Homo sapiens OX=9606 GN=DNMT1 PE=1 SV=2
Q01105	63	27	27		1393000000	1425900000	1538900000	33489	Protein SET OS=Homo sapiens OX=9606 GN=SET PE=1 SV=3
Q969M3	16	3	3		8123700	30085000	18562000	27989	Protein YIPF5 OS=Homo sapiens OX=9606 GN=YIPF5 PE=1 SV=1
Q9Y3L5	45	6	2		415300	1954600	867130	20745	Ras-related protein Rap-2c OS=Homo sapiens OX=9606 GN=RAP2C PE=1 SV=1
Q712K3	18	3	3		7280000	12965000	14419000	27166	Ubiquitin-conjugating enzyme E2 R2 OS=Homo sapiens OX=9606 GN=UBE2R2 PE=1 SV=1
P82979	34	6	6		102130000	136340000	114600000	23671	SAP domain-containing ribonucleoprotein OS=Homo sapiens OX=9606 GN=SARNP PE=1 SV=3
Q15785	48	14	14		56350000	90615000	80068000	34559	Mitochondrial import receptor subunit TOM34 OS=Homo sapiens OX=9606 GN=TOMM34 PE=1 SV=2
P07108	91	9	9	Acetylation (Protein N-term)	251820000	260310000	323140000	10044	Acyl-CoA-binding protein OS=Homo sapiens OX=9606 GN=DBI PE=1 SV=2
Q9BVJ6	38	20	16		151980000	106240000	108580000	87978	U3 small nucleolar RNA-associated protein 14 homolog A OS=Homo sapiens OX=9606 GN=UTP14A PE=1 SV=1
O00629	23	10	5	Acetylation (Protein N-term)	22793000	17017000	33863000	57887	Importin subunit alpha-3 OS=Homo sapiens OX=9606 GN=KPNA4 PE=1 SV=1
Q8WWQ0	7	7	7		19762000	18719000	28964000	206688	PH-interacting protein OS=Homo sapiens OX=9606 GN=PHIP PE=1 SV=2
Q9Y4E8	13	9	9	Acetylation (Protein N-term)	19514000	17327000	17462000	112419	Ubiquitin carboxyl-terminal hydrolase 15 OS=Homo sapiens OX=9606 GN=USP15 PE=1 SV=3
Q8TEX9	28	21	21	Oxidation (M); Acetylation (Protein N-term)	78934000	365000000	92324000	118715	Importin-4 OS=Homo sapiens OX=9606 GN=IPO4 PE=1 SV=2
Q2TAL8	10	4	4		5532100	5057400	5994200	86436	Transcriptional regulator QRICH1 OS=Homo sapiens OX=9606 GN=QRICH1 PE=1 SV=1
Q9BT78	37	11	11		59421000	49127000	56482000	46269	COP9 signalosome complex subunit 4 OS=Homo sapiens OX=9606 GN=COPS4 PE=1 SV=1
Q9Y5M8	37	9	9		40426000	98322000	91240000	29702	Signal recognition particle receptor subunit beta OS=Homo sapiens OX=9606 GN=SRPRB PE=1 SV=3
P52701	26	28	28		74068000	157750000	159650000	152785	DNA mismatch repair protein Msh6 OS=Homo sapiens OX=9606 GN=MSH6 PE=1 SV=2
Q9BTW9	11	9	9		14936000	18112000	16563000	132600	Tubulin-specific chaperone D OS=Homo sapiens OX=9606 GN=TBCD PE=1 SV=2
P19838	3	2	2		1177900	387290	298140	105356	Nuclear factor NF-kappa-B p105 subunit OS=Homo sapiens OX=9606 GN=NFKB1 PE=1 SV=2
O94761	3	2	2		201950	640630	336750	133067	ATP-dependent DNA helicase Q4 OS=Homo sapiens OX=9606 GN=RECQL4 PE=1 SV=2
Q96HS1	39	10	10		57940000	68343000	50039000	32004	Serine/threonine-protein phosphatase PGAM5 mitochondrial OS=Homo sapiens OX=9606 GN=PGAM5 PE=1 SV=2
A3KMH1	2	3	3		9305400	3194900	4778000	214823	von Willebrand factor A domain-containing protein 8 OS=Homo sapiens OX=9606 GN=VWA8 PE=1 SV=2
Q9NZL4	19	6	6	Oxidation (M)	16759000	23064000	27788000	39303	Hsp70-binding protein 1 OS=Homo sapiens OX=9606 GN=HSPBP1 PE=1 SV=2
P29083	19	5	5	Acetylation (Protein N-term)	22678000	11907000	20933000	49452	General transcription factor IIE subunit 1 OS=Homo sapiens OX=9606 GN=GTF2E1 PE=1 SV=2
Q03252	51	28	24		161740000	191120000	305090000	69948	Lamin-B2 OS=Homo sapiens OX=9606 GN=LMNB2 PE=1 SV=4
P0DN76	22	6	6	Acetylation (Protein N-term)	80183000	51457000	52569000	27872	Splicing factor U2AF 35 kDa subunit-like protein OS=Homo sapiens OX=9606 GN=U2AF1L5 PE=1 SV=1
Q01081	22	6	6	Acetylation (Protein N-term)	80183000	51457000	52569000	27872	Splicing factor U2AF 35 kDa subunit OS=Homo sapiens OX=9606 GN=U2AF1 PE=1 SV=3
Q13409	24	11	11		66331000	68684000	101680000	71457	Cytoplasmic dynein 1 intermediate chain 2 OS=Homo sapiens OX=9606 GN=DYNC1I2 PE=1 SV=3
Q14254	41	13	13		217330000	184040000	178650000	47064	Flotillin-2 OS=Homo sapiens OX=9606 GN=FLOT2 PE=1 SV=2
Q9Y3C1	52	10	10		78168000	80751000	73694000	21188	Nucleolar protein 16 OS=Homo sapiens OX=9606 GN=NOP16 PE=1 SV=2
P11388	51	84	66	Acetylation (Protein N-term)	431490000	785200000	695830000	174384	DNA topoisomerase 2-alpha OS=Homo sapiens OX=9606 GN=TOP2A PE=1 SV=3
P02748	2	2	2		1333200	11492000	24383000	63173	Complement component C9 OS=Homo sapiens OX=9606 GN=C9 PE=1 SV=2
Q96TA1	46	24	23		157490000	220500000	276250000	84138	Protein Niban 2 OS=Homo sapiens OX=9606 GN=NIBAN2 PE=1 SV=3
Q9NW13	26	21	21		126690000	284200000	215490000	85738	RNA-binding protein 28 OS=Homo sapiens OX=9606 GN=RBM28 PE=1 SV=3
Q9H4A6	35	7	7		13854000	164620000	16956000	33811	Golgi phosphoprotein 3 OS=Homo sapiens OX=9606 GN=GOLPH3 PE=1 SV=1
Q9BQ95	33	9	9		15950000	26965000	37744000	49148	Evolutionarily conserved signaling intermediate in Toll pathway mitochondrial OS=Homo sapiens OX=9606 GN=ECSIT PE=1 SV=1
P01009	2	1	1		43380000	86632000	71625000	46737	Alpha-1-antitrypsin OS=Homo sapiens OX=9606 GN=SERPINA1 PE=1 SV=3
Q8IUE6	49	25	1		9785900	9247500	9544900	13995	Histone H2A type 2-B OS=Homo sapiens OX=9606 GN=H2AC21 PE=1 SV=3
P18031	25	8	8	Acetylation (Protein N-term)	105540000	37981000	49737000	49967	Tyrosine-protein phosphatase non-receptor type 1 OS=Homo sapiens OX=9606 GN=PTPN1 PE=1 SV=1
P35659	50	19	19	Oxidation (M); Acetylation (Protein N-term)	149770000	348090000	308210000	42674	Protein DEK OS=Homo sapiens OX=9606 GN=DEK PE=1 SV=1
P62241	40	19	19		823650000	1297800000	1248000000	24205	40S ribosomal protein S8 OS=Homo sapiens OX=9606 GN=RPS8 PE=1 SV=2
O14974	20	15	15		34645000	59852000	48642000	115281	Protein phosphatase 1 regulatory subunit 12A OS=Homo sapiens OX=9606 GN=PPP1R12A PE=1 SV=1
Q9NRW3	6	1	1		635340	0	753430	22826	DNA dC->dU-editing enzyme APOBEC-3C OS=Homo sapiens OX=9606 GN=APOBEC3C PE=1 SV=2
Q9BVL2	2	1	1		635340	0	753430	60897	Nucleoporin p58/p45 OS=Homo sapiens OX=9606 GN=NUP58 PE=1 SV=1
O60443	13	5	5		5654000	9207400	10139000	54555	Gasdermin-E OS=Homo sapiens OX=9606 GN=GSDME PE=1 SV=2
Q9H773	39	7	7	Acetylation (Protein N-term)	39916000	39163000	30696000	18681	dCTP pyrophosphatase 1 OS=Homo sapiens OX=9606 GN=DCTPP1 PE=1 SV=1
P49959	19	9	9	Acetylation (Protein N-term)	14759000	24370000	26115000	80593	Double-strand break repair protein MRE11 OS=Homo sapiens OX=9606 GN=MRE11 PE=1 SV=3
Q96PZ0	34	17	17		78011000	72238000	89223000	75035	Pseudouridylate synthase 7 homolog OS=Homo sapiens OX=9606 GN=PUS7 PE=1 SV=2
O75937	37	12	12		62869000	130350000	103190000	29842	DnaJ homolog subfamily C member 8 OS=Homo sapiens OX=9606 GN=DNAJC8 PE=1 SV=2
Q9BY78	2	1	1		8705300	23629000	20019000	47737	E3 ubiquitin-protein ligase RNF26 OS=Homo sapiens OX=9606 GN=RNF26 PE=1 SV=1
P20340	49	10	9	Acetylation (Protein N-term)	24093000	57945000	55142000	23593	Ras-related protein Rab-6A OS=Homo sapiens OX=9606 GN=RAB6A PE=1 SV=3
Q9BSL1	3	1	1		1595800	366350	1480800	45338	Ubiquitin-associated domain-containing protein 1 OS=Homo sapiens OX=9606 GN=UBAC1 PE=1 SV=1
Q9NS37	2	1	1		23406000	35354000	26367000	37134	CREB/ATF bZIP transcription factor OS=Homo sapiens OX=9606 GN=CREBZF PE=1 SV=2
P55854	20	2	1		13959000	18960000	13159000	11637	Small ubiquitin-related modifier 3 OS=Homo sapiens OX=9606 GN=SUMO3 PE=1 SV=2
P02649	4	1	1		2819600	300360	1092400	36154	Apolipoprotein E OS=Homo sapiens OX=9606 GN=APOE PE=1 SV=1
Q9NR99	0	1	1		29517000	87275000	71440000	312149	Matrix-remodeling-associated protein 5 OS=Homo sapiens OX=9606 GN=MXRA5 PE=1 SV=3
Q96I51	9	2	2		17754000	27828000	19089000	49997	RCC1-like G exchanging factor-like protein OS=Homo sapiens OX=9606 GN=RCC1L PE=1 SV=2
Q9BW72	27	1	1	Acetylation (Protein N-term)	4665100	91868	1762900	11529	HIG1 domain family member 2A mitochondrial OS=Homo sapiens OX=9606 GN=HIGD2A PE=1 SV=1
Q13202	1	1	1		29389000	42840000	53017000	65827	Dual specificity protein phosphatase 8 OS=Homo sapiens OX=9606 GN=DUSP8 PE=1 SV=2
Q9Y6K0	3	1	1		65343000	1442200	135070000	46554	Choline/ethanolaminephosphotransferase 1 OS=Homo sapiens OX=9606 GN=CEPT1 PE=1 SV=1
Q9NV06	23	7	7		52939000	21679000	13718000	51402	DDB1- and CUL4-associated factor 13 OS=Homo sapiens OX=9606 GN=DCAF13 PE=1 SV=2
Q96IZ7	3	1	1		14047000	15196000	12396000	38677	Serine/Arginine-related protein 53 OS=Homo sapiens OX=9606 GN=RSRC1 PE=1 SV=1
P67870	23	3	3		23354000	22066000	15874000	24942	Casein kinase II subunit beta OS=Homo sapiens OX=9606 GN=CSNK2B PE=1 SV=1
Q15642	15	5	5		10931000	13477000	13921000	68352	Cdc42-interacting protein 4 OS=Homo sapiens OX=9606 GN=TRIP10 PE=1 SV=3
Q8IXQ4	4	1	1		946670	1127300	1780000	38142	GPALPP motifs-containing protein 1 OS=Homo sapiens OX=9606 GN=GPALPP1 PE=1 SV=1
Q8NI35	1	1	1		0	220940	969380	196367	InaD-like protein OS=Homo sapiens OX=9606 GN=PATJ PE=1 SV=3
O75319	3	1	1		533480	15522000	10431000	43710	RNA/RNP complex-1-interacting phosphatase OS=Homo sapiens OX=9606 GN=DUSP11 PE=1 SV=2
Q6ZS17	1	1	1		59062000	253580	888770	132307	Rho family-interacting cell polarization regulator 1 OS=Homo sapiens OX=9606 GN=RIPOR1 PE=1 SV=1
Q14691	7	1	1		1535700	3399600	2182300	22988	DNA replication complex GINS protein PSF1 OS=Homo sapiens OX=9606 GN=GINS1 PE=1 SV=1
B1ANS9	1	1	1		15095000	48202000	30260000	123631	WD repeat-containing protein 64 OS=Homo sapiens OX=9606 GN=WDR64 PE=2 SV=1
Q5VST9	0	1	1		4820100	9279500	7211400	868496	Obscurin OS=Homo sapiens OX=9606 GN=OBSCN PE=1 SV=3
Q9Y4Y9	21	1	1	Acetylation (Protein N-term)	11952000	8660600	21933000	9937	U6 snRNA-associated Sm-like protein LSm5 OS=Homo sapiens OX=9606 GN=LSM5 PE=1 SV=3
P18827	5	1	1		1153700	17019000	21920000	32462	Syndecan-1 OS=Homo sapiens OX=9606 GN=SDC1 PE=1 SV=3
Q9H0C8	3	1	1	Acetylation (Protein N-term)	1161700	573310	1914100	42907	Integrin-linked kinase-associated serine/threonine phosphatase 2C OS=Homo sapiens OX=9606 GN=ILKAP PE=1 SV=1
P04424	4	1	1		379570	448780	1321200	51658	Argininosuccinate lyase OS=Homo sapiens OX=9606 GN=ASL PE=1 SV=4
O14684	7	1	1		8583300	8585100	5703600	17102	Prostaglandin E synthase OS=Homo sapiens OX=9606 GN=PTGES PE=1 SV=2
P00390	18	6	6		59232000	19656000	18740000	56257	Glutathione reductase mitochondrial OS=Homo sapiens OX=9606 GN=GSR PE=1 SV=2
[truncated: 2,252 more rows]

## Sheet: BSA-angled-tip1000cells-peptide
Peptide	Avg. ppm	Avg. Area	Sample 1	Sample 2	Sample 3	Accession
LLLPGELAK	4.5	1332300000	1211800000	693430000	758220000
ISGLIYEETR	4.3	1235700000	1042700000	745550000	938800000	P62805|H4_HUMAN
EIAQDFK	3.7	280530000	320050000	252190000	202520000	P84243|H33_HUMAN:Q71DI3|H32_HUMAN:P68431|H31_HUMAN
AGFAGDDAPR	4.2	384350000	606300000	354950000	330510000	P60709|ACTB_HUMAN:P63261|ACTG_HUMAN:P68032|ACTC_HUMAN:Q6S8J3|POTEE_HUMAN
GYSFTTTAER	3.3	348760000	556050000	287220000	313960000	P60709|ACTB_HUMAN:P63261|ACTG_HUMAN
AGLQFPVGR	3.7	816450000	448180000	204310000	293290000	Q16777|H2A2C_HUMAN:Q6FI13|H2A2A_HUMAN:Q93077|H2A1C_HUMAN:Q8IUE6|H2A2B_HUMAN:P0C0S5|H2AZ_HUMAN:Q71UI9|H2AV_HUMAN
IGGIGTVPVGR	3.5	296670000	341910000	283150000	309640000	P68104|EF1A1_HUMAN:Q05639|EF1A2_HUMAN
EIQTAVR	3.8	354630000	436990000	274830000	224560000
YPIEHGIITNWDDMEK	3.4	642250000	257840000	1018600000	852920000	P68032|ACTC_HUMAN
IIAPPER	4	276470000	471520000	298320000	298600000	P60709|ACTB_HUMAN:P63261|ACTG_HUMAN:P68032|ACTC_HUMAN:Q562R1|ACTBL_HUMAN
VFLENVIR	3.7	1087300000	849180000	536360000	586720000	P62805|H4_HUMAN
DLTDYLMK	3.7	230920000	95962000	386140000	311860000	P60709|ACTB_HUMAN:P63261|ACTG_HUMAN:P68032|ACTC_HUMAN:Q562R1|ACTBL_HUMAN
ESYSVYVYK	3.7	391800000	283280000	200270000	150340000
VAPEEHPVLLTEAPLNPK	3.3	1946300000	2332100000	2329300000	2107400000	P60709|ACTB_HUMAN:P63261|ACTG_HUMAN
QLIVGVNK	4	112300000	154860000	140390000	113150000	P68104|EF1A1_HUMAN:Q05639|EF1A2_HUMAN
DSYVGDEAQSK	3.2	364800000	696820000	335410000	252160000	P60709|ACTB_HUMAN:P63261|ACTG_HUMAN:P68032|ACTC_HUMAN
QVHPDTGISSK	3.9	906850000	1295500000	581750000	443120000
IEEELGSK	3.7	127070000	220450000	132170000	135460000	P06733|ENOA_HUMAN
DAVTYTEHAK	3.9	835670000	1036200000	440150000	349790000	P62805|H4_HUMAN
QEYDESGPSIVHR	3.1	640830000	993190000	774210000	729930000	P60709|ACTB_HUMAN:P63261|ACTG_HUMAN:Q6S8J3|POTEE_HUMAN
STELLIR	4.1	591320000	480410000	498840000	473460000	P84243|H33_HUMAN:Q71DI3|H32_HUMAN:P68431|H31_HUMAN:Q5TEC6|H3PS2_HUMAN
LMEDLDR	2.7	96200000	127160000	113760000	129090000	P06703|S10A6_HUMAN
EITALAPSTMK	8.3	637280000	582800000	757000000	903270000	P60709|ACTB_HUMAN:P63261|ACTG_HUMAN:P68032|ACTC_HUMAN
DNIQGITKPAIR	3.3	1250700000	1060700000	734140000	682360000	P62805|H4_HUMAN
TIAPALVSK	3.5	169980000	224090000	187010000	242480000	P06733|ENOA_HUMAN
TEWLDGK	3.7	87072000	68991000	136190000	108770000	P62937|PPIA_HUMAN
VDNSSLTGESEPQTR	3.7	8065700	4226900	3611800	4128800	P05023|AT1A1_HUMAN
IGAEVYHNLK	3.7	189760000	296910000	204740000	222850000	P06733|ENOA_HUMAN
IFVNDDR	3.7	2811200	4120000	3025000	2349600	Q12906|ILF3_HUMAN
DLAGSIIGK	6.1	61627000	17738000	188360000	19892000	P61978|HNRPK_HUMAN
STGGAPTFNVTVTK	3.4	146850000	163950000	198770000	187170000	P07737|PROF1_HUMAN
TIAQDYGVLK	4	104670000	109070000	140400000	138380000	Q06830|PRDX1_HUMAN
A(+42.01)DKPDMGEIASFDK	3.6	127950000	123040000	161060000	172350000	P63313|TYB10_HUMAN
A(+42.01)SGVAVSDGVIK	3.7	108750000	100820000	114470000	194100000	P23528|COF1_HUMAN
REPLPSR	3.9	2322000	5587600	2051300	1649000	P38159|RBMX_HUMAN
S(+42.01)DKPDMAEIEK	3.7	180970000	234500000	220470000	261630000	P62328|TYB4_HUMAN
NSNPALNDNLEK	3.3	14142000	19368000	18137000	16035000	O00299|CLIC1_HUMAN
EIAENALGK	3.2	5154400	4264700	4059000	3347100	P31942|HNRH3_HUMAN
DNIQGITK	3.4	78425000	71267000	131310000	92839000	P62805|H4_HUMAN
EYQELMNVK	3.5	100920000	66667000	85258000	74166000	P05787|K2C8_HUMAN
NLQEAEEWYK	3	62321000	30434000	70877000	66447000	P08670|VIME_HUMAN
EGMNIVEAMER	3.6	162700000	94160000	254730000	260830000	P62937|PPIA_HUMAN
LQDAEIAR	3.5	135430000	221020000	135260000	142340000	P06703|S10A6_HUMAN
LGRPAANTK	2.9	2640500	2362900	4294500	3147900	P62241|RS8_HUMAN
VTIAQGGVLPNIQAVLLPK	3.4	2185100000	324790000	670780000	614870000	Q16777|H2A2C_HUMAN:Q6FI13|H2A2A_HUMAN:Q93077|H2A1C_HUMAN:Q8IUE6|H2A2B_HUMAN
MINTDLSR	6.2	15605000	6554400	2032500	6130400	P36578|RL4_HUMAN
GPSSVEDIK	3.8	91618000	77397000	52881000	40944000	P06748|NPM_HUMAN
EAMEDGEIDGNK	3	14837000	21802000	17293000	13263000	P19338|NUCL_HUMAN
YIDQEELNK	4.1	80866000	113870000	86731000	69152000	P08238|HS90B_HUMAN:P07900|HS90A_HUMAN
GLGTDEESILTLLTSR	2.9	7941900	1074700	3370900	7197700	P08758|ANXA5_HUMAN
NYYEQWGK	3.3	45026000	30208000	38275000	29872000	P22626|ROA2_HUMAN
QPTIFQNK	2.7	22566000	17120000	16670000	14398000	P62280|RS11_HUMAN
TDTGEPMGR	3.8	6357300	13556000	9985600	1887700	P07900|HS90A_HUMAN
VSFELFADK	3.9	64505000	50385000	92828000	89972000	P62937|PPIA_HUMAN
VLSSIEQK	3	33427000	40680000	44685000	37152000	P31947|1433S_HUMAN
ADGYVLEGK	3	18842000	16995000	15840000	14074000	P62241|RS8_HUMAN
TLSDYNIQK	3.3	34528000	36825000	36306000	25494000	P62979|RS27A_HUMAN:P62987|RL40_HUMAN
DVNAAIATIK	3.6	93183000	88499000	90766000	95922000	Q9BQE3|TBA1C_HUMAN
ETMQSLNDR	2.4	28072000	32102000	31991000	23496000	P05783|K1C18_HUMAN
QLSSGVSEIR	3.6	21823000	25784000	23931000	18364000	P04792|HSPB1_HUMAN
YEELQSLAGK	3.6	130170000	109930000	98332000	92562000	P05787|K2C8_HUMAN
VVNPLFEK	3	13460000	11527000	12179000	14760000	P62424|RL7A_HUMAN
ALAAAGYDVEK	3.7	204830000	169010000	119710000	119440000	P16403|H12_HUMAN:P10412|H14_HUMAN:P16402|H13_HUMAN:Q02539|H11_HUMAN
NTLQLHR	3.3	10290000	2542800	3125100	2066400	P61313|RL15_HUMAN
AVFPSIVGR	4.6	115150000	176890000	142050000	122020000	P60709|ACTB_HUMAN:P63261|ACTG_HUMAN:P68032|ACTC_HUMAN:Q6S8J3|POTEE_HUMAN
VAEDEAEAAAAAK	3.1	13003000	14093000	11591000	9951300	P08195|4F2_HUMAN
AEAESMYQIK	3.3	47090000	40499000	52582000	47607000	P05787|K2C8_HUMAN
ITESEEVVSR	3.7	28172000	29293000	39602000	21281000	P02545|LMNA_HUMAN
SPAVKPAAAPK	2.9	3608000	4338500	2325300	1550200	Q14978|NOLC1_HUMAN
LTPITYPQGLAMAK	2.5	4505700	2545000	4285200	3540500	P63000|RAC1_HUMAN
IVEMSTSK	2.8	37374000	31722000	45133000	35948000	P63241|IF5A1_HUMAN
ISDSEGFK	2.9	7248900	7290600	4687300	3666500	P23246|SFPQ_HUMAN
DQVANSAFVER	2.8	29371000	42528000	26841000	27266000	P07900|HS90A_HUMAN
LVPGGGATEIELAK	2.8	13885000	14980000	15884000	17407000	P50990|TCPQ_HUMAN
VAQGVSGAVQDK	2.6	6804500	9788600	8001000	6185100	P12268|IMDH2_HUMAN
DPGVLDR	4.4	18747000	18582000	21053000	16061000	P31949|S10AB_HUMAN
SYVTTSTR	3.7	16155000	31788000	9848600	8184600	P08670|VIME_HUMAN
AQYDELAR	2.7	53129000	34398000	26572000	22974000	P05783|K1C18_HUMAN
GRPGIGATHSSR	5.7	332500	322430	949550	58024	P62841|RS15_HUMAN
QTVAVGVIK	4.2	126090000	195170000	130860000	108590000	P68104|EF1A1_HUMAN:Q05639|EF1A2_HUMAN
VVSSIEQK	4.1	15552000	24953000	20529000	15544000	P63104|1433Z_HUMAN
HQGVMVGMGQK	3.3	232170000	240810000	278340000	241360000	P60709|ACTB_HUMAN:P63261|ACTG_HUMAN:P68032|ACTC_HUMAN:Q562R1|ACTBL_HUMAN
LILIESR	2.6	16258000	8165900	6140600	6654000	P62277|RS13_HUMAN
ADLINNLGTIAK	4.1	130720000	142900000	142710000	117410000	P08238|HS90B_HUMAN:P07900|HS90A_HUMAN
YSTSGSSGLTTGK	2.5	6304300	1157600	11591000	9951300	Q16891|MIC60_HUMAN
DVVVSKEDAR	3	33754000	44871000	42701000	38535000	Q66K89|E4F1_HUMAN
TIVEEVQDGK	3	33754000	44871000	42701000	38535000	Q04695|K1C17_HUMAN
QQYESVAAK	3.8	33655000	62725000	27294000	18953000	P08670|VIME_HUMAN
MQASIEK	3.4	20268000	33878000	19284000	14505000	P06748|NPM_HUMAN
LEQLGAQR	3.2	5649100	8261300	6151000	4824200	P16435|NCPR_HUMAN
MVPAGMGAGLER	2.9	10497000	5064300	4250600	5475800	P52272|HNRPM_HUMAN
QVEHPLLSGLLYPGLQALDEEYLK	2.3	384150	0	0	558440	P54577|SYYC_HUMAN
ATAVMPDGQFK	3.7	100700000	120450000	126860000	140390000	Q06830|PRDX1_HUMAN
VGDVYIPR	3.6	15708000	13844000	12980000	10935000	Q01130|SRSF2_HUMAN:Q9BRL6|SRSF8_HUMAN
LLEGEESR	3.1	64187000	77648000	63581000	51964000	P08670|VIME_HUMAN:P05787|K2C8_HUMAN:P08729|K2C7_HUMAN:P04264|K2C1_HUMAN
EGSASTEVLR	2.7	2135700	2595200	1743400	1228200	O75643|U520_HUMAN
VINEEYK	3.9	5428000	8325900	4893900	3480500	Q16576|RBBP7_HUMAN:Q09028|RBBP4_HUMAN
AVNYFSK	8.8	4833800	4202600	2963400	7851600	Q00610|CLH1_HUMAN
LFYLALPPTVYEAVTK	0.9	3983300	578540	5300400	6650700	P11413|G6PD_HUMAN
YSGGNYRDNYDN	7.6	10381000	21704000	8302900	7071600	P98179|RBM3_HUMAN
YYVTIIDAPGHR	2.9	127670000	166920000	152770000	136030000	P68104|EF1A1_HUMAN
YQAVTATLEEK	3.2	33223000	21440000	21822000	20278000	P40429|RL13A_HUMAN
YALYDATYETK	3.6	87127000	103630000	101380000	114400000	P23528|COF1_HUMAN:Q9Y281|COF2_HUMAN
IVQAEGEAEAAK	3.3	10617000	10865000	7435000	6039900	Q99623|PHB2_HUMAN
LMELHGEGSSSGK	3.2	37413000	23794000	23719000	18053000	P61247|RS3A_HUMAN
EESGKPGAHVTVK	4	47094000	94983000	48280000	44120000	P22626|ROA2_HUMAN
TVSLGAGAK	3	11580000	19950000	10047000	9533700	P06748|NPM_HUMAN
IVVNLTGR	4.1	12457000	6378500	6141000	5884000	P62244|RS15A_HUMAN
SDGAPASDSKPGSSEAAPSSK	3.1	35642000	49643000	17181000	11423000	P80723|BASP1_HUMAN
FDSEYER	3.1	2827300	4666400	2315100	1506800	P43243|MATR3_HUMAN
LGDLYEEEMR	3.8	74006000	61638000	86428000	103080000	P08670|VIME_HUMAN
AQYEDIANR	3.6	80667000	57912000	48768000	38659000	P05787|K2C8_HUMAN
ESYSIYVYK	3.3	147030000	88254000	75818000	62195000
ALMDEVVK	4	33151000	28507000	44548000	48292000	P00558|PGK1_HUMAN
VLQATVVAVGSGSK	3.2	25392000	14336000	4477300	6235100	P61604|CH10_HUMAN
LQAEIEGLK	3.7	84832000	77892000	81358000	84506000	P05787|K2C8_HUMAN
KADIDLTK	3.1	17225000	9715600	5337200	37152000	P62269|RS18_HUMAN
LTESYSSSQDPPEK	3.4	2820500	4654300	3749100	2878500	P22314|UBA1_HUMAN
LSVDYGK	4.3	18592000	28346000	18409000	16493000	Q9BQE3|TBA1C_HUMAN:P68366|TBA4A_HUMAN
NIYSEELR	3.2	17408000	19030000	23126000	18011000	P02545|LMNA_HUMAN
FDLMYAK	4	27386000	29044000	31175000	30362000	Q9BQE3|TBA1C_HUMAN:P68366|TBA4A_HUMAN:A6NHL2|TBAL3_HUMAN
SAINEVVTR	3.3	35693000	33174000	23842000	19602000	P62899|RL31_HUMAN
QVVESAYEVIK	3.2	57601000	41621000	67447000	98180000	P00338|LDHA_HUMAN
QVSDDLTER	3.8	6434700	5574100	5675100	4380400	P35232|PHB_HUMAN
SLVSVTK	3	21402000	34107000	25101000	17374000	P08238|HS90B_HUMAN
VLAAVYK	2.6	6144900	6232300	7183100	6501500	P04075|ALDOA_HUMAN:P09972|ALDOC_HUMAN
ASGPPVSELITK	4.6	220900000	191360000	185600000	164910000	P16403|H12_HUMAN:P10412|H14_HUMAN:P16402|H13_HUMAN
SADTLWDIQK	4.2	41540000	50653000	33217000	65192000	P07195|LDHB_HUMAN
NPADLPK	3.6	12345000	18972000	14668000	10061000	P13639|EF2_HUMAN
LAGESESNLR	3	10176000	13575000	12979000	11273000	P55072|TERA_HUMAN
QLQDEMLR	3.6	10589000	9077900	13010000	12153000	P02545|LMNA_HUMAN
DGQVINETSQHHDDLE	3.2	114290000	184250000	90468000	94699000	P08670|VIME_HUMAN
GGNFGFGDSR	3.9	63397000	50762000	43096000	44197000	P22626|ROA2_HUMAN
AGELTEDEVER	3	28284000	25491000	18132000	15465000	P62269|RS18_HUMAN
VLTVINQTQK	3	42836000	30231000	23766000	20643000	P42766|RL35_HUMAN
NAGVEGSLIVEK	3.2	32415000	12741000	10687000	27849000	P10809|CH60_HUMAN
TPAQYDASELK	3	73788000	119270000	31776000	30052000	P07355|ANXA2_HUMAN
QLEEEQQALQK	8.4	4557700	6336200	5404200	4812300	P07951|TPM2_HUMAN
VLTEIIASR	3.7	13627000	20897000	10276000	12151000	P08758|ANXA5_HUMAN
EVSTYIK	3.6	70386000	108020000	81034000	68446000	P68104|EF1A1_HUMAN
YSVDIPLDK	4.4	36048000	28598000	21171000	23692000	P61353|RL27_HUMAN
SEIDLFNIR	3.9	9129300	14934000	9270400	9904400	P08758|ANXA5_HUMAN
DGYQQNFK	12	2490500	3379300	1670700	4241200	Q14444|CAPR1_HUMAN
ASINMLR	16.2	12141000	6550600	9165700	2465000	P18124|RL7_HUMAN
GLTSVINQK	4	38686000	69110000	31350000	39382000	P07195|LDHB_HUMAN
LLQLVEDR	3.5	10022000	7140100	3942200	4222000	P17844|DDX5_HUMAN
AEEDEILNR	3.1	10561000	10997000	9186700	7894200	P27824|CALX_HUMAN
EYQDLLNVK	3.3	59977000	67223000	64386000	59533000	P08670|VIME_HUMAN:P12036|NFH_HUMAN
SLQSVAEER	3.1	25258000	18135000	16590000	13576000	P61313|RL15_HUMAN
IEDFLER	4	24436000	24254000	20212000	19497000	P46781|RS9_HUMAN
MGESDDSILR	3.8	18479000	16287000	21024000	18213000	P63220|RS21_HUMAN
VREEFKELK	6.2	3146100	5543100	2000100	957350	P02545|LMNA_HUMAN
NFGIGQDIQPK	3.5	53982000	34844000	34588000	33399000	P62424|RL7A_HUMAN
NQGGYGGSSSSSSYGSGR	3.7	33142000	38295000	9744700	6349700	P09651|ROA1_HUMAN
ALYEAGER	3.1	8568700	7616200	7438900	6775800	P04083|ANXA1_HUMAN
TSFFQALGITTK	2.8	24422000	5828100	13193000	11180000	P05388|RLA0_HUMAN
FLDGIYVSEK	3.8	22717000	10197000	12776000	12524000	P32969|RL9_HUMAN
VGEFSGANK	3	35783000	65976000	38774000	32046000	P10599|THIO_HUMAN
GFAFVQYVNER	3.5	26931000	9193200	7339900	9412600	P07910|HNRPC_HUMAN
TEISEMNR	3	24478000	25227000	31807000	20695000	P05787|K2C8_HUMAN
GLSEDTTEETLK	2.5	27235000	42737000	31930000	29469000	P19338|NUCL_HUMAN
LLVVTDPR	3.2	16724000	16170000	12304000	13426000	P08865|RSSA_HUMAN
LELQGPR	3.5	18009000	16583000	10406000	10814000	P19338|NUCL_HUMAN
ADVDVSGPK	3.4	6651400	10730000	7515500	5586300	Q09666|AHNK_HUMAN
QTATQLLK	3.5	20846000	13696000	13177000	10684000	P62424|RL7A_HUMAN
YISPDQLADLYK	6	240910000	356930000	237060000	285930000	P06733|ENOA_HUMAN
ELGTVMR	6.5	41749000	13224000	18489000	120660000	P0DP24|CALM2_HUMAN:P0DP23|CALM1_HUMAN:P0DP25|CALM3_HUMAN
QDVDNASLAR	3.6	49161000	72182000	51625000	41733000	P08670|VIME_HUMAN
VGGTSDVEVNEK	3.1	26861000	44957000	11125000	12865000	P10809|CH60_HUMAN
VTLTSEEEAR	2.9	55940000	75839000	46388000	60462000	P00338|LDHA_HUMAN
IQAVLLPK	3.3	37369000	46941000	53456000	43271000	Q16777|H2A2C_HUMAN:Q6FI13|H2A2A_HUMAN:Q93077|H2A1C_HUMAN:Q8IUE6|H2A2B_HUMAN
EIIDLVLDR	3.7	42331000	25705000	61314000	49984000	Q9BQE3|TBA1C_HUMAN
A(+42.01)ATASAGAGGIDGKPR	2.9	5764400	6664200	3811800	3413400	Q02978|M2OM_HUMAN
TDEAAFQK	3.5	18376000	34413000	19332000	13908000	P26447|S10A4_HUMAN
LVQAFQFTDK	3.2	73199000	85340000	75175000	78178000	Q06830|PRDX1_HUMAN
FGQGGAGPVGGQGPR	3	20884000	18883000	10738000	8527100	P23246|SFPQ_HUMAN
TDEGIAYR	4.5	14661000	24974000	19856000	13813000	P32119|PRDX2_HUMAN
TIQEMQQK	6.2	7513100	11826000	9084400	6208500	O43707|ACTN4_HUMAN
TYTEHAKR	6.2	7513100	11826000	9084400	6208500	P62805|H4_HUMAN
FNVWDTAGQEK	2.7	41449000	27727000	56329000	58331000	P62826|RAN_HUMAN
SMQDVVEDFK	3.7	6618700	3712300	9255400	7602700	P08729|K2C7_HUMAN
RPLEDGDQPDAK	3.2	2419100	4725400	1982600	1683700	Q96AE4|FUBP1_HUMAN
EVVEEAENGR	3	48712000	94724000	55358000	39617000	P06454|PTMA_HUMAN
VAQPTITDNK	3.2	7818400	8292100	11665000	9797100	P21333|FLNA_HUMAN
LPLQDVYK	3.3	71492000	71846000	61902000	50302000	P68104|EF1A1_HUMAN:Q05639|EF1A2_HUMAN
AAEDDEDDDVDTK	2.8	9855900	21704000	8302900	7071600	P06454|PTMA_HUMAN
LVIITAGAR	3.7	29294000	41268000	17972000	35985000	P00338|LDHA_HUMAN
ISTVVSSK	3.6	2825200	3666600	2305900	1803000	P37108|SRP14_HUMAN
EQISDIDDAVR	3.3	38072000	54934000	42262000	41648000	P53999|TCP4_HUMAN
TQGFLALFSGDTGEIK	3.1	2132500	1380000	2135700	2273300	Q9Y230|RUVB2_HUMAN
GILAADESTGSIAK	3.1	116200000	131900000	135230000	171250000	P04075|ALDOA_HUMAN
LEVQATDREENKQIALGTSK	3.6	5798400	0	11363000	6216500	P11387|TOP1_HUMAN
LDADPSLQR	3.9	19845000	22439000	21124000	20700000	P08729|K2C7_HUMAN
NVLIFDLGGGTFDVSILTIEDGIFEVK	0.2	817290	0	891100	2378100	P11142|HSP7C_HUMAN:P54652|HSP72_HUMAN
EAIEGTYIDK	2.9	9998600	10588000	10511000	9525200	P62280|RS11_HUMAN
IISSIEQK	13.2	22260000	32397000	31032000	24463000	P62258|1433E_HUMAN
VGPVSLPR	4.2	364210000	772400000	313950000	365950000	Q12802|AKP13_HUMAN
KDDEVQVVR	4	11441000	13216000	9446300	7647000	P61254|RL26_HUMAN:Q9UNX3|RL26L_HUMAN
VQPNEAVYTK	12.4	16663000	14573000	39602000	9886600	P11413|G6PD_HUMAN
A(+42.01)AGTLYTYPENWR	3.3	20555000	19407000	23697000	22562000	P26641|EF1G_HUMAN
YHTSQSGDEMTSLSEYVSR	3.6	72168000	60959000	90270000	76823000	P08238|HS90B_HUMAN
SSASAPDVDDPEAFPALA	3.7	13312000	13962000	13418000	9391400	Q8NC51|PAIRB_HUMAN
AYEPQGGSGYDYSYAGGR	4.4	17368000	19948000	11112000	9754400	P61978|HNRPK_HUMAN
QLYEEEIR	3.5	8429100	5113000	6373100	12021000	P05787|K2C8_HUMAN
LSSEMNTSTVNSAR	3.2	6362400	8562400	5769200	5205900	P20700|LMNB1_HUMAN
YPMAVGLNK	3.7	25286000	9425500	12158000	11506000	Q9Y3U8|RL36_HUMAN
FASFIDK	3.7	46648000	31222000	29149000	34051000	P05787|K2C8_HUMAN:P08729|K2C7_HUMAN:P35908|K22E_HUMAN:P04264|K2C1_HUMAN:P13647|K2C5_HUMAN
GFGFVDFNSEEDAK	3.2	54066000	16071000	29410000	25479000	P19338|NUCL_HUMAN
S(+42.01)DAAVDTSSEITTK	3.9	104020000	136500000	101290000	153570000	P06454|PTMA_HUMAN
LVSESSDVLPK	3.4	144440000	113530000	104330000	120170000	P05787|K2C8_HUMAN
EVQTNDLK	7.8	9353200	17064000	11542000	5425500	P61247|RS3A_HUMAN
DNSTMGYMAAK	3.3	12189000	8503300	10739000	9064900	P07900|HS90A_HUMAN
SEIDMNDIK	3.3	19575000	17897000	20734000	23446000	P04083|ANXA1_HUMAN
DGTAGIPNLQLYDVK	2.9	22963000	1645400	43204000	40887000	Q9BY44|EIF2A_HUMAN
LLADQAEAR	3.3	24782000	19388000	14053000	11835000	P84098|RL19_HUMAN
LPDGYEFK	4	32832000	31412000	39063000	37835000	P09382|LEG1_HUMAN
DYNVTANSK	3.1	22164000	44933000	15955000	19718000	P00338|LDHA_HUMAN
GIYAYGFEKPSAIQQR	2.8	37163000	31641000	25418000	22073000	P60842|IF4A1_HUMAN:P38919|IF4A3_HUMAN:Q14240|IF4A2_HUMAN
ISVYYNEATGGK	3.2	84624000	67526000	43757000	43772000	P07437|TBB5_HUMAN
MGAGLGHGMDR	3.2	5561900	3313600	3485500	2469300	P52272|HNRPM_HUMAN
SETAPAAPAAPAPAEK	2.2	7809700	5051100	3847800	3560900	P10412|H14_HUMAN
SVGVVTTTR	8	4521200	4279000	3969300	3236000	P05187|PPB1_HUMAN:P09923|PPBI_HUMAN
FEDENFILK	3.3	246190000	287540000	329650000	352700000	P62937|PPIA_HUMAN
EAMGIYISTLK	2.8	1163400	1076100	1250300	852430	O95433|AHSA1_HUMAN
VGSTSENITQK	3.6	5985800	7562600	4391400	2410700	O00571|DDX3X_HUMAN
TLVLLMGK	3.9	26473000	27925000	38036000	33791000	P07737|PROF1_HUMAN
DQITAGNAAR	3.7	5420800	10897000	5590100	3597000	P22234|PUR6_HUMAN
GGGGNFGPGPGSNFR	3.5	136470000	108620000	76388000	67783000	P22626|ROA2_HUMAN
STLINSLFLTDLYSPEYPGPSHR	3.2	2367800	225770	2654400	3554900	Q16181|SEPT7_HUMAN
QDIAFAYQR	2.6	37091000	41432000	17012000	18906000	P07355|ANXA2_HUMAN
FVIATSTK	4.3	17746000	11017000	9959900	8772600	Q02878|RL6_HUMAN
DINLQDEDWNEFNDINK	1.9	1452600	0	777930	1210900	Q6P2Q9|PRP8_HUMAN
EDLQELNDR	3	19918000	32336000	19062000	23125000	P02545|LMNA_HUMAN
IGVITNR	3.3	23632000	25026000	16025000	13555000	P62701|RS4X_HUMAN
VEFMDDTSR	3.8	23316000	18806000	17087000	15620000	P62857|RS28_HUMAN
IGFPWSEIR	3.3	18305000	10582000	14617000	20820000	P26038|MOES_HUMAN:P15311|EZRI_HUMAN:P35241|RADI_HUMAN
ALLFIPR	3.7	7151900	9129900	3219100	3651200	P08238|HS90B_HUMAN
KMPFTEK	10.9	9897700	9543000	13430000	13734000	P12956|XRCC6_HUMAN
GSAITGPVAK	3.7	15954000	15930000	12147000	10615000	P62829|RL23_HUMAN
EVATAIR	3	7112200	7833200	6890300	5079600	P15880|RS2_HUMAN
KDWYDVK	11.8	7667800	2805100	1509900	1756200	P61247|RS3A_HUMAN
WSEPNEEELIK	2.9	6821200	5874700	9582800	9853100	P39748|FEN1_HUMAN
FIGNLNTLVVK	3.8	5125800	5474800	9264500	5764000	P07910|HNRPC_HUMAN
VITDENWR	4	9048300	9077900	13010000	12153000	Q9H3N1|TMX1_HUMAN
YRPGTVALR	3.9	392940000	109470000	33317000	23361000	P84243|H33_HUMAN:Q71DI3|H32_HUMAN:P68431|H31_HUMAN:Q5TEC6|H3PS2_HUMAN
AALQELLSK	3.4	32702000	20610000	16345000	15283000	P62851|RS25_HUMAN
EVDEQMLNVQNK	7.7	150320000	122700000	149630000	165900000	P07437|TBB5_HUMAN:P68371|TBB4B_HUMAN:Q13885|TBB2A_HUMAN
ILSGVVTK	3.8	15711000	17625000	12506000	9312900	P62280|RS11_HUMAN
VEQLGAEGNVEESQK	2.9	5381900	6945900	4033400	4021000	Q9Y383|LC7L2_HUMAN
LIEVDDER	3.6	28911000	25813000	20182000	16810000	P62753|RS6_HUMAN
EFHLNESGDPSSK	3.2	49262000	65649000	49262000	39735000	Q01105|SET_HUMAN
ASLEAAIADAEQR	3	84947000	80700000	90497000	98909000	P05787|K2C8_HUMAN
SRLDQELK	3.3	29407000	34849000	25710000	20873000	P46781|RS9_HUMAN
LEEVLTNK	4.3	1997300	2415100	2345600	2796700	P78417|GSTO1_HUMAN
VGGSGVNVNAK	2.8	3000400	4889700	3268700	2025600	Q09666|AHNK_HUMAN
LYNEALK	5.3	2383100	2923500	3396600	2883500	O95163|ELP1_HUMAN
IGPLGLSPK	3	34203000	18842000	14369000	15569000	P30050|RL12_HUMAN
NSLESYAFNMK	3	26484000	27938000	24982000	22495000	P11142|HSP7C_HUMAN
FTVETASR	3.5	11512000	4212300	15621000	21452000	P11388|TOP2A_HUMAN
ATVTPSPVK	3	2323800	2910500	2869100	1541400	Q9H1E3|NUCKS_HUMAN
LAPDYDALDVANK	3.6	65593000	42726000	34275000	34929000	P62750|RL23A_HUMAN
AVVGVVAGGGR	3.3	29336000	23022000	14238000	13771000	P62917|RL8_HUMAN
DAHALIYK	9.6	3484300	3125900	5166500	4796000	Q9NYK5|RM39_HUMAN
SADTLWGIQK	3.5	52884000	41109000	49978000	81643000	P00338|LDHA_HUMAN
ALDTMNFDVIK	3.3	15940000	6260700	10394000	8301200	P11940|PABP1_HUMAN:Q13310|PABP4_HUMAN:Q9H361|PABP3_HUMAN
LYDIDVAK	3.3	17745000	13732000	11749000	11277000	P62750|RL23A_HUMAN
QLFDQVVK	3.7	17650000	18651000	24083000	22470000	P26038|MOES_HUMAN:P15311|EZRI_HUMAN:P35241|RADI_HUMAN
LGVTANDVK	3.7	5921000	8461700	5492600	7930400	P40925|MDHC_HUMAN
VNPIQGLASK	3	7441600	5505300	2588400	3183600	P13073|COX41_HUMAN
LMSNLDSNR	3.4	17165000	26159000	18335000	16056000	P26447|S10A4_HUMAN
YDGIILPGK	4	33418000	25259000	21623000	23010000	P62913|RL11_HUMAN
DDNMFQIGK	4.1	25511000	25215000	31751000	32601000	P53999|TCP4_HUMAN
VISELNGK	3.4	17626000	16168000	18497000	11940000	P05387|RLA2_HUMAN
NISFNDKK	3.1	4301500	7340100	5562100	3386800	P26038|MOES_HUMAN:P15311|EZRI_HUMAN:P35241|RADI_HUMAN
IASLEVENQSLR	3.4	23390000	30360000	26422000	26269000	P29692|EF1D_HUMAN
TNSTFNQVVLK	3.6	26345000	21723000	22834000	20809000	Q07020|RL18_HUMAN
STMQELNSR	12.4	4561600	9154200	1902000	5379000	P35527|K1C9_HUMAN
IFAPNHVVAK	3.3	22648000	18318000	12450000	11159000	Q02543|RL18A_HUMAN
IREEYPDR	3.4	86987000	123370000	50806000	38124000	P07437|TBB5_HUMAN:P68371|TBB4B_HUMAN:Q13885|TBB2A_HUMAN
DTEPLIQTAK	6.9	5448200	9997800	5262800	4558500	P48643|TCPE_HUMAN
A(+42.01)SLSLAPVNIFK	3.6	5622700	4597000	5108300	3765000	P78371|TCPB_HUMAN
IIIPPFLAYGEK	3.1	1122900	584140	346540	427770	Q96AY3|FKB10_HUMAN
THPQWYPAR	4.2	9480200	12005000	7507500	6666800	Q9NZ01|TECR_HUMAN
EGSLVINSK	8.8	3086100	3033000	5584100	1916700	Q9Y5B9|SP16H_HUMAN
DQLIYNLLK	3.4	34639000	44846000	42647000	45957000	P00338|LDHA_HUMAN
GDYPLEAVR	3.2	106930000	167350000	113910000	139600000	P14618|KPYM_HUMAN
TNQELQEINR	3.7	63153000	94116000	29263000	23522000	P07355|ANXA2_HUMAN
LPGELAK	3.4	44240000	62908000	79668000	31501000
ELNITAAK	3.7	17466000	14992000	13921000	10338000	P62081|RS7_HUMAN
MGGEEAEIR	3.3	5934500	4952800	4157400	3455700	Q08211|DHX9_HUMAN
AMNGESLDGR	2.7	7051200	10647000	8737500	5925400	P98179|RBM3_HUMAN
SIYYITGESK	3.6	50516000	74113000	49802000	50130000	P08238|HS90B_HUMAN
GGKPGLTIQAPQLEVSVPSANIEGLEGK	1	3540400	0	1360400	6405600	Q09666|AHNK_HUMAN
ALVQNDTLLQVK	3.3	8302800	888820	3032300	2881400	Q92522|H1X_HUMAN
STAGDTHLGGEDFDNR	3.6	74656000	136110000	52583000	43854000	P11142|HSP7C_HUMAN:P54652|HSP72_HUMAN
LQIWDTAGQER	2.9	20873000	18993000	24843000	23652000	P61106|RAB14_HUMAN:Q9H0U4|RAB1B_HUMAN:P62820|RAB1A_HUMAN:P61006|RAB8A_HUMAN:P61026|RAB10_HUMAN:Q92930|RAB8B_HUMAN:Q15286|RAB35_HUMAN:P20338|RAB4A_HUMAN
GMVSAYPR	6.4	9099700	7662600	13430000	13734000	P33991|MCM4_HUMAN
M(+42.01)NDTVTIR	3.6	7956500	4580400	8387600	10898000	P62847|RS24_HUMAN
AIYELLFK	3.9	983260	1308100	1122700	1502300	P46783|RS10_HUMAN
DSYGGPPR	3.8	3820900	6702800	2399500	1463700	P38159|RBMX_HUMAN
TVGVEPAADGK	3.4	18648000	20755000	14062000	9979500	P46779|RL28_HUMAN
FSETGAGK	4.5	8908500	2569100	6392200	4430600	Q9BQE3|TBA1C_HUMAN
IQLVEEELDR	3.7	37142000	46229000	48714000	50482000	P67936|TPM4_HUMAN:P06753|TPM3_HUMAN:P07951|TPM2_HUMAN:P09493|TPM1_HUMAN
LADALQELR	4.2	27967000	23261000	25329000	26201000	P02545|LMNA_HUMAN
VTDALNATR	9.4	34242000	47342000	10141000	18395000	P10809|CH60_HUMAN
SVGGSGGGSFGDNLVTR	3.1	19377000	26750000	18320000	16941000	P02545|LMNA_HUMAN
AQDFKTDLR	6.9	44524000	63313000	44627000	39470000	P84243|H33_HUMAN:Q71DI3|H32_HUMAN:P68431|H31_HUMAN
LAVNMVPFPR	3.7	93319000	18638000	9037000	8825000	P07437|TBB5_HUMAN:P68371|TBB4B_HUMAN:Q13885|TBB2A_HUMAN:Q13509|TBB3_HUMAN:Q9BUF5|TBB6_HUMAN
VELDNMPLR	3.2	15135000	11176000	15453000	14483000	Q15233|NONO_HUMAN
VGGTSDVEVNEKK	2.7	10482000	13766000	1106900	6574500	P10809|CH60_HUMAN
APIIAVTR	4.1	98485000	105470000	129450000	140930000	P14618|KPYM_HUMAN
AVTEMNGR	3	7089700	3743300	3789100	3068900	P11940|PABP1_HUMAN:Q13310|PABP4_HUMAN:Q9H361|PABP3_HUMAN
ELSDIAHR	3.2	32426000	45404000	41157000	34869000	P04075|ALDOA_HUMAN
ITITNDK	3.2	21349000	35702000	25681000	18998000	P11142|HSP7C_HUMAN:P0DMV8|HS71A_HUMAN:P0DMV9|HS71B_HUMAN:P54652|HSP72_HUMAN
VGLQVVAVK	3.8	21367000	11284000	10534000	11685000	P10809|CH60_HUMAN
EENIEDATEK	3.2	2308500	4155200	2223100	1736000	P82970|HMGN5_HUMAN
IFTSIGEDYDER	2.4	13452000	5609600	10120000	8198400	P35232|PHB_HUMAN
DLMPHDLAR	5	18139000	16193000	36833000	17403000	P55084|ECHB_HUMAN
SGLIYEETR	5	18139000	16193000	36833000	17403000	P62805|H4_HUMAN
SYSDPPLK	8.8	4100100	7206400	4643100	3296800	P52597|HNRPF_HUMAN
IDDVVNTR	3.4	4511900	5788500	6049000	4527700	P50991|TCPD_HUMAN
YDDYSSSR	0.6	1878300	5222900	409760	1880500	P38159|RBMX_HUMAN
VDIEGPDVNIEGPEGK	3.3	8582200	9365800	10043000	9783400	Q09666|AHNK_HUMAN
VELQELNDR	3.2	64348000	88218000	80240000	83755000	P08670|VIME_HUMAN
NDLAVVDVR	3.8	33827000	32636000	25621000	29553000	P19338|NUCL_HUMAN
IAEENIMK	10.2	5650400	4099500	10314000	7140700	Q14320|FA50A_HUMAN
TAVAPIER	4	17949000	16170000	6808600	5764400	P05141|ADT2_HUMAN:P12236|ADT3_HUMAN:P12235|ADT1_HUMAN
GAEAANVTGPGGVPVQGSK	3.2	31357000	37541000	22005000	20780000	P67809|YBOX1_HUMAN
EAIEGTYIDKK	2.6	24848000	14026000	9977300	10037000	P62280|RS11_HUMAN
TPAQFDADELR	2.9	35262000	29150000	29696000	36808000	P04083|ANXA1_HUMAN
GGKPEPPAMPQPVPTA	3.2	57088000	41602000	43197000	47826000	P23396|RS3_HUMAN
DLSSSEPVHAK	3.4	1440900	1540100	1330300	1392200	Q8WTT2|NOC3L_HUMAN
IVADKDYSVTANSK	3.2	37167000	59697000	28680000	40410000	P07195|LDHB_HUMAN
MILPVGAANFR	8.3	54311000	85563000	59175000	56575000	P06733|ENOA_HUMAN
QQNTFTR	13.8	3610500	3418700	3881600	2130000	P21333|FLNA_HUMAN:O75369|FLNB_HUMAN:Q14315|FLNC_HUMAN
VLGATLLPDLIQK	3.4	3039900	4440300	2819500	3214200	P55786|PSA_HUMAN
EDIYSGGGGGGSR	3.5	4558200	7820700	3794800	2107000	Q13151|ROA0_HUMAN
AAATPESQEPQAK	3	825650	1964100	465880	332400	P49006|MRP_HUMAN
NLQYYDISAK	3.3	46966000	66132000	56579000	46376000	P62826|RAN_HUMAN
LESGMQNMSIHTK	3.1	67400000	51728000	57098000	48808000	P05787|K2C8_HUMAN
VTTHPLAK	16.7	4484900	5943900	4093600	7902000	Q99497|PARK7_HUMAN
LAPGGHVGR	3.2	1143800	2222900	724150	905960	P36578|RL4_HUMAN
FPLTTESAMK	3.9	41308000	23493000	29417000	29497000	P62750|RL23A_HUMAN
ELTIGSK	3.8	56633000	92927000	65649000	51694000	P06703|S10A6_HUMAN
DIPGLTDTTVPR	3.2	37798000	32893000	37781000	32925000	P62753|RS6_HUMAN
YYPTEDVPR	3.8	35432000	29915000	18251000	21212000	Q02878|RL6_HUMAN
NLDIERPTYTNLNR	3.5	213150000	164740000	217960000	153920000	Q9BQE3|TBA1C_HUMAN:P68366|TBA4A_HUMAN
LREDLER	3.5	15700000	14759000	8913800	6772700	P62269|RS18_HUMAN:Q9BQS8|FYCO1_HUMAN
ELLPVLISAMK	2.9	2751500	1483700	5166300	3379800	P18206|VINC_HUMAN
SLGSVQAPSYGAR	3.6	65226000	58507000	36693000	35415000	P05783|K1C18_HUMAN
AQMVQEDLEK	3.3	16297000	13741000	21756000	18850000	P26038|MOES_HUMAN
WISIMTER	3.6	30004000	23172000	11357000	12916000	P07355|ANXA2_HUMAN
LAMQEFMILPVGAANFR	2.6	53115000	2444700	37896000	84248000	P06733|ENOA_HUMAN
ATMQNLNDR	3.2	11865000	11528000	12663000	13411000	Q04695|K1C17_HUMAN:Q9C075|K1C23_HUMAN
YDEEFQR	4	2265100	4191100	2805200	2064200	P55060|XPO2_HUMAN
EGLELLK	3.7	93082000	136910000	97904000	132700000	P06733|ENOA_HUMAN
EVYFAER	3.9	15677000	18172000	22454000	18373000	P50238|CRIP1_HUMAN
EELDFQK	8.6	11976000	17923000	15505000	11602000	P02545|LMNA_HUMAN
VTYTEHAK	3.5	27031000	31246000	19564000	11707000	P62805|H4_HUMAN
DLTEYLSR	4.2	9701800	11408000	8029000	7253600	O14979|HNRDL_HUMAN
LQVVDQPLPVR	3.2	12579000	11564000	13207000	13069000	P49327|FAS_HUMAN
VQTEVLQK	3.1	1853600	1244800	879900	732920	Q99848|EBP2_HUMAN
KQEIVAEK	3.1	1853600	1244800	879900	732920	Q9ULV4|COR1C_HUMAN
AQIFANTVDNAR	3.1	65912000	2531100	2017300	6654900	P05783|K1C18_HUMAN
DAMQYASESK	4.7	5089200	9313200	6183400	4860200	Q00610|CLH1_HUMAN
ELISNASDALDK	3.2	72164000	87272000	88478000	93773000	P08238|HS90B_HUMAN:P14625|ENPL_HUMAN
MGANSLER	2.9	7624000	5880300	3789100	3068900	P52272|HNRPM_HUMAN
DLYDAGVK	3.1	19081000	38448000	13430000	13734000	P07355|ANXA2_HUMAN
TAGINVR	3.5	2665100	4058300	2737600	2333500	P50991|TCPD_HUMAN
QQSAQSQVSTTAENK	3.5	1305800	1716400	465700	312090	Q9H0A0|NAT10_HUMAN
MLDMGFEPQIR	3.1	25230000	10080000	14872000	13000000	P17844|DDX5_HUMAN:O00571|DDX3X_HUMAN:Q92841|DDX17_HUMAN
LPEKWESVK	8.9	5637800	9997800	5262800	4558500	O76021|RL1D1_HUMAN
LETVGSIFSR	7	7186400	7337400	8159300	10043000	Q9Y3D9|RT23_HUMAN
LLSLSGK	3.7	22767000	31918000	15921000	16699000	P41252|SYIC_HUMAN
GFSVVADTPELQR	2.9	4680300	5806600	5726000	4924700	Q14847|LASP1_HUMAN
VLVQNAAGSQEK	2.7	4406800	7028600	5563900	4586300	Q9Y490|TLN1_HUMAN
LEAEIATYR	3.6	26153000	29268000	30575000	25769000	P05783|K1C18_HUMAN
VFLEELMAPVASIWLSQDMHR	11.1	2053200	0	6320100	1399600	Q9HAV4|XPO5_HUMAN
EFNAEVHR	3.6	12708000	20735000	12425000	11252000	P46777|RL5_HUMAN
LYEQLSGK	7.2	7897200	5170900	12962000	11530000	P30086|PEBP1_HUMAN
YSVQTADHR	2.8	2639300	4208000	2761100	2339400	Q16658|FSCN1_HUMAN
SSAVDPEPQVK	3	2384200	3068800	2537200	2006600	Q5SSJ5|HP1B3_HUMAN
LNNLVLFDK	3.5	13705000	11767000	9848000	8950900	P62851|RS25_HUMAN
WNQDTMEQK	3.7	1323900	1888400	1287100	1004500	Q15637|SF01_HUMAN
LALGIPLPELR	2.6	1795000	817410	1105700	745200	P27708|PYR1_HUMAN
SPILVATAVAAR	3	11110000	5870600	4573200	5039000	O00571|DDX3X_HUMAN
VETYNDESR	6.8	1204300	748960	523420	480560	P27694|RFA1_HUMAN
IGHPAPNFK	3.4	63689000	95082000	70613000	67976000	Q06830|PRDX1_HUMAN
QRIDEFESM	3.4	7360100	5770200	9145300	9157700	P26038|MOES_HUMAN
TATQLAVNK	3	3296200	3664000	3791400	2513100	Q99832|TCPH_HUMAN
QGANINEIR	3.3	8056600	9252300	8212500	7489700	Q15365|PCBP1_HUMAN
AVAGDASESALLK	8.5	8958300	5732800	4418600	6265900	P05023|AT1A1_HUMAN
DAGVIAGLNVLR	4	17212000	11192000	11949000	10446000	P0DMV8|HS71A_HUMAN:P0DMV9|HS71B_HUMAN
AEHDSILAEK	5.6	11192000	8287000	12344000	8077600	P26639|SYTC_HUMAN
NIGLGFK	3.1	16617000	13356000	12112000	10593000	P62280|RS11_HUMAN
LSQAYAISAGVSLEGQQLFQTIHK	5.3	25111000	7077800	34605000	54174000	Q3MHD2|LSM12_HUMAN
VLGILAMIDEGETDWK	1.1	1073800	0	862840	2144300	Q15181|IPYR_HUMAN
VVGAVGSDEK	15.9	3969400	2964300	10141000	2487100	Q14914|PTGR1_HUMAN
SSTVGLVTLNDMK	3.4	5805900	6430800	7676200	6860000	Q14320|FA50A_HUMAN
ERLEQQVPVNQVFGQDEMIDVIGVTK	1.6	44100000	0	7996200	14332000	P39023|RL3_HUMAN
YESLTDPSK	4	46035000	68357000	62177000	43698000	P08238|HS90B_HUMAN:P07900|HS90A_HUMAN
LLFNDVQTLK	3.4	7879800	8270500	7205800	7535100	Q15149|PLEC_HUMAN
VATPGKK	2.9	8598800	15362000	9101300	8248900	P19338|NUCL_HUMAN
DNSTMGYMMAK	2.9	18362000	11014000	16929000	21992000	P08238|HS90B_HUMAN
VADISGDTQK	4.1	4206300	7044400	4422800	2531400	Q7KZF4|SND1_HUMAN
NYEDEDSLK	8.4	1278800	912490	658190	480560	P11388|TOP2A_HUMAN
ELTAVVQK	2.9	10831000	13502000	13118000	11325000	P23396|RS3_HUMAN
MPSLEISAPK	2.3	11409000	4446000	19438000	19847000	Q09666|AHNK_HUMAN
DLEGSDIDTR	3.4	4617900	6191500	4845400	5285600	P55060|XPO2_HUMAN
YLAEVAAGDDKK	2.9	28360000	42070000	38199000	28749000	P63104|1433Z_HUMAN
NAIANASTLAEVER	3.1	5970400	5313400	4621500	4294900	P09661|RU2A_HUMAN
FAAATGATPIAGR	2.8	32544000	32386000	27728000	25507000	P08865|RSSA_HUMAN
FDAGELITQR	3.8	12473000	9205800	9770700	6829500	P35232|PHB_HUMAN
EYAKPTR	3.4	2729600	3497800	3269500	2726300	P14866|HNRPL_HUMAN
FKEMELPAK	7.3	27291000	31826000	26428000	21769000	Q15149|PLEC_HUMAN
VNFLPEIITLSK	2.8	1449400	1416000	1841100	1192600	Q14204|DYHC1_HUMAN
VDKGVVPLAGTDGETTTQGLDGLSER	5.6	4303500	3919700	4083800	4961300	P09972|ALDOC_HUMAN
AQIWDTAGQER	3.5	5440000	4237200	4463500	5269900	Q15907|RB11B_HUMAN
SLETENAGLR	3.7	28809000	36437000	27096000	22767000	P02545|LMNA_HUMAN
VDLGGFAGLFDLK	9.2	1209400	122320	1802300	923980	P22102|PUR2_HUMAN
MYEEHLK	2.8	6472900	11787000	6710500	4824200	P84090|ERH_HUMAN
SSQSSSQQFSGIGR	3.2	5237100	5055300	1972500	2600600	Q92841|DDX17_HUMAN
GFGFVLFK	3.8	7211600	6222400	5490400	4056600	Q14103|HNRPD_HUMAN:O14979|HNRDL_HUMAN
KKEEPSQNDISPK	2.8	2148500	3011900	832840	565750	Q9NR30|DDX21_HUMAN
VYVGNLGNNGNK	3.5	11356000	16733000	12927000	9242200	P84103|SRSF3_HUMAN
IILDLISESPIK	3.3	32381000	25086000	25188000	23597000	P61978|HNRPK_HUMAN
QVDQLTNDK	3.1	37854000	59176000	40628000	35320000	P08670|VIME_HUMAN
LNSVQSSERPLFLVHPIEGSTTVFHSLASR	3.9	12553000	6879100	13805000	0	P49327|FAS_HUMAN
RPYAPINANAIK	6.9	703630	0	1146700	1125900	O94776|MTA2_HUMAN
FTTTAER	3.7	7074900	18598000	7862500	1839000	P60709|ACTB_HUMAN:P63261|ACTG_HUMAN:Q562R1|ACTBL_HUMAN
LISQIVSSITAS	4.7	14609000	11569000	21503000	25362000	Q9BQE3|TBA1C_HUMAN:P68366|TBA4A_HUMAN
DGTGVVEFVR	3.8	19780000	19802000	12083000	13564000	Q07955|SRSF1_HUMAN
NHVGKPLLK	1.4	501060	0	497060	302970	Q8NCA5|FA98A_HUMAN:Q52LJ0|FA98B_HUMAN
IYEDGDDDMKR	3.1	2955700	3892100	2677300	1666000	Q9HB71|CYBP_HUMAN
LTIAEER	6.6	19625000	11084000	13683000	11528000	P62701|RS4X_HUMAN
SYSSGGEDGYVR	2.8	2117000	3156200	1753400	1497900	Q13347|EIF3I_HUMAN
AAYEAELGDAR	2.9	19080000	23055000	20877000	20681000	P02545|LMNA_HUMAN
ADLEMQIENLKEELAYLKK	1.6	2546900	0	535530	1559600	Q04695|K1C17_HUMAN
SGAQASSTPLSPTR	2.9	28064000	28793000	27057000	19752000	P02545|LMNA_HUMAN
SAVEDEGLK	3.2	9518300	16299000	10314000	7140700	P0DMV8|HS71A_HUMAN:P0DMV9|HS71B_HUMAN
EGIVALR	2.8	3359200	4748600	4015000	4017900	P40227|TCPZ_HUMAN
NFDFEDVFVKIPQAIAQLSK	2.9	1994700	0	3091000	4295400	Q16795|NDUA9_HUMAN
EAAENSLVAYK	3.9	34268000	42326000	45681000	37119000	P62258|1433E_HUMAN
RLEEAALR	7.3	9826700	12486000	15238000	9773500	Q96A33|CCD47_HUMAN
DSEHIDDETR	0.7	207650	287470	281910	261210	P58107|EPIPL_HUMAN
GVVPLAGTNGETTTQGLDGLSER	4.2	108850000	131210000	171670000	122710000	P04075|ALDOA_HUMAN
GIDPFSLDALSK	3.1	7312100	7451600	6918400	7237700	P40227|TCPZ_HUMAN
GTGIVSAPVPK	3.4	30203000	19781000	17643000	15971000	P15880|RS2_HUMAN
LVGMPAKR	8.6	2182800	1499900	2440400	1712400	P38646|GRP75_HUMAN
DSAQNSVIIVDK	4.2	4455800	1329200	4582600	6104300	P02786|TFR1_HUMAN
QVDAESWK	6.9	4116800	4157400	6458000	5043900	P26639|SYTC_HUMAN
LIANNTTVER	9.6	2320000	4232200	1707300	2522900	O96019|ACL6A_HUMAN
FPVAPLIPYPLITK	1.4	520240	513580	739910	577290	P49756|RBM25_HUMAN
DGVVEITGK	4	14223000	17336000	22771000	14797000	P04792|HSPB1_HUMAN
VVNGAAASQPPSK	3.5	848220	1602200	929060	582500	O75533|SF3B1_HUMAN
ENPYYDSR	2.8	4391100	6079200	3205800	2220900	Q00610|CLH1_HUMAN
LSPSPTSQR	4.1	4135900	4274800	2233600	1794600	P02545|LMNA_HUMAN
DDAMLLK	2.8	5166500	4278800	5087800	5543400	P10809|CH60_HUMAN
AAVATFLQSVQVPEFTPK	3.3	9211600	6934900	11479000	10316000	P22314|UBA1_HUMAN
DAGEGGLSLAIEGPSK	7.7	14173000	12554000	17934000	22034000	P21333|FLNA_HUMAN
LSVAAQEAAR	3.9	2770300	2913800	1897200	1824000	Q15149|PLEC_HUMAN
GSGTAEVELK	7.4	55586000	58112000	85254000	70798000	P14618|KPYM_HUMAN
SDEGHPFR	4	2379700	2698800	3015000	2607100	Q9NQC3|RTN4_HUMAN
TWTVVDAK	4	6027100	6115200	9678700	8314400	P13010|XRCC5_HUMAN
YEISSVPTFLFFK	1.6	906930	288920	1177000	1487800	O76003|GLRX3_HUMAN
GGDSIGETPTPGASK	3	2913800	3700400	3275100	2821600	O75533|SF3B1_HUMAN
ELIPTEEALR	4	8087000	8475700	8871300	7323300	Q15149|PLEC_HUMAN
LWDLTTGTTTR	3.4	23920000	16031000	27936000	26698000	P63244|RACK1_HUMAN
LEGNSPQGSNQGVK	3.4	1007100	1464800	606040	375630	P61006|RAB8A_HUMAN
LVINSGNGAVEDR	3.1	8566000	12560000	8352200	7495100	P16070|CD44_HUMAN
VLEQLTGQTPVFSK	3.9	52073000	32721000	36903000	26576000	P62913|RL11_HUMAN
ISSDLDGHPVPK	5.9	48164000	77912000	47077000	61527000	P29401|TKT_HUMAN
GLQTSQDAR	14.6	1352300	2320500	1480400	1221500	P27797|CALR_HUMAN
YENGAFQER	15.2	638660	1047700	692250	646430	P23919|KTHY_HUMAN
AGVQADEDEDGDEKDEKK	15.2	194480	545680	0	0	P26358|DNMT1_HUMAN
VHELNEEIGK	3.5	5555300	6878100	4576200	3696200	Q9Y383|LC7L2_HUMAN:Q9NQ29|LUC7L_HUMAN
ETPAATEAPSSTPK	3	48614000	51249000	31558000	30623000	P80723|BASP1_HUMAN
GESENAGTNQETR	2.6	1003400	224370	2104900	1684500	Q08170|SRSF4_HUMAN
NFDDATMK	4.1	800780	1290300	1151400	761350	Q99439|CNN2_HUMAN
AQFEQLKDGK	8	4073000	7562600	4391400	2410700	Q15149|PLEC_HUMAN
EIAQEFKTDLR	3.1	49148000	34425000	28974000	36003000	Q5TEC6|H3PS2_HUMAN
A(+42.01)ETLEFNDVYQEVK	2.1	6788900	2521900	3117900	4273100	Q08945|SSRP1_HUMAN
SLTNDWEDHLAVK	3.5	98570000	57050000	141630000	111550000	P08238|HS90B_HUMAN:P07900|HS90A_HUMAN
ELEEIVQPIISK	4	14861000	12838000	5229300	6380100	P11021|BIP_HUMAN
DNQHQDEAEGDPGNRHEPR	2.3	163550	436030	0	0	O00461|GOLI4_HUMAN
TGIQEMR	2.8	1548600	2553000	1174600	909360	Q13435|SF3B2_HUMAN
DLIAQAR	2.5	4042400	3571200	3568400	3115100	Q9NR30|DDX21_HUMAN:Q9BQ39|DDX50_HUMAN
LPTGQISGPEIK	3.6	6288400	7792200	7472900	6783500	Q09666|AHNK_HUMAN
FISVGYVDDTQFVR	3.3	3474400	3752300	1389900	2360700	P10321|HLAC_HUMAN:P01889|HLAB_HUMAN
NFEDVAFDEK	3.7	4670900	3044500	4061000	6434000	P07237|PDIA1_HUMAN
DINTDFLLVVLR	0.9	308450	0	132770	451290	Q08211|DHX9_HUMAN
TGQAPGYSYTAANK	3	7370300	10897000	5904700	4980000	P99999|CYC_HUMAN
HGIPMSHVAR	4.8	627250	361180	584300	598820	P24666|PPAC_HUMAN
VLNSYWVGEDSTYK	8.5	30834000	17173000	19218000	20130000	P61313|RL15_HUMAN
WHPYTNTAR	4.3	1531500	1961200	1832500	1724200	Q96G21|IMP4_HUMAN
ELPSFLGK	4.3	48198000	47839000	35076000	33553000	P26447|S10A4_HUMAN
LSNIFVIGK	3.2	25614000	9087500	5890700	5853700	P62701|RS4X_HUMAN
NSLPDTVQIR	3	6901900	7341200	6447300	7483900	P56537|IF6_HUMAN
LTPTEVK	17.1	1359900	1905900	1596800	1169500	P25787|PSA2_HUMAN
SVNELIYK	3	21984000	16316000	17776000	15433000	P18124|RL7_HUMAN
GLFIIDDK	3.7	55575000	60183000	77975000	70317000	Q06830|PRDX1_HUMAN:Q13162|PRDX4_HUMAN
NSSTYWEGK	4.8	3547700	4269100	5428300	4493600	P26639|SYTC_HUMAN
GYFSEEMNR	3.2	2765800	3469700	3605300	3988200	Q15149|PLEC_HUMAN
YEEIDNAPEER	3.2	2948900	1416100	701420	744800	P49411|EFTU_HUMAN
VLGMDPLPSK	4	9492800	6095400	8785400	7018400	Q12906|ILF3_HUMAN
YLMEEDEDAYKK	3.3	29502000	20386000	24608000	19841000	P46777|RL5_HUMAN
YSQVLANGLDNK	3	24020000	24128000	23240000	19782000	P62269|RS18_HUMAN
IGIEIIK	3	8977800	8889800	8620300	6724400	P10809|CH60_HUMAN
VPVHDVTDASK	3.7	22931000	37990000	28564000	23623000	P21333|FLNA_HUMAN
QVDGDNSHVEMK	3.3	5606800	2479300	2435900	1676500	P02786|TFR1_HUMAN
DVDLEFLAK	3.1	5319900	2810700	6637300	7997900	P55072|TERA_HUMAN
PGPTPSGTNVGSSGR	2.5	6206100	6176100	5496500	2911700	P60468|SC61B_HUMAN
GFSLEELR	3.1	22072000	14723000	9827700	10814000	P26373|RL13_HUMAN
NQNSWGTGEDVK	9.4	3321500	3949300	4901300	3903300	P20700|LMNB1_HUMAN
FVNVVPTFGK	4.2	28560000	19951000	19512000	15455000	P62861|RS30_HUMAN
AFLIEEQK	3.9	23830000	18179000	17349000	18648000	P49207|RL34_HUMAN
NLDPFLLFDEFK	1.7	320910	0	195170	449060	O00625|PIR_HUMAN
GYFDEEMNR	3.5	10269000	9186700	11042000	12181000	Q15149|PLEC_HUMAN:P58107|EPIPL_HUMAN
SQDAEVGDGTTSVTLLAAEFLK	2.3	5000800	164290	3514400	5213100	Q99832|TCPH_HUMAN
VSDFGGR	9.7	533060	1067300	630770	252390	P27694|RFA1_HUMAN
MGGEEKPIGAGEEK	3.2	6372000	9434800	7933300	6273900	P26639|SYTC_HUMAN
AIEEQMVAAK	5.6	23271000	36437000	27096000	22767000	Q9H0A0|NAT10_HUMAN
LVGPEVR	3.3	3241200	6152200	4416400	1354900	Q02809|PLOD1_HUMAN
NPVIAQK	3.3	3241200	6152200	4416400	1354900	P31948|STIP1_HUMAN
VNEYVDAR	7.4	8160000	2889700	26572000	1400600	Q96T88|UHRF1_HUMAN
NAGFTPQER	2.9	4946500	6261900	4441700	3375500	P27695|APEX1_HUMAN
TGAAPIIDVVR	3.5	58038000	52618000	35023000	30448000	P46776|RL27A_HUMAN
EAAEALGAAK	8.1	5134800	7929400	4684700	3735000	P05187|PPB1_HUMAN
AQVIYTR	7.1	9110800	2923500	3396600	6066600	P62851|RS25_HUMAN
LQDEIQNMKEEMAR	1.8	40812000	621920	25569000	14601000	P08670|VIME_HUMAN
VLADPSDDTK	3.5	21244000	34977000	23170000	18449000	Q15149|PLEC_HUMAN:P58107|EPIPL_HUMAN
V(+42.01)EADRPGK	3.8	9672000	10459000	6444600	4608600	P38159|RBMX_HUMAN
AIDGLDR	5.8	4489100	3828500	7955200	5081000	P42330|AK1C3_HUMAN
VVTDTDETELAR	3.2	8298200	7988100	7226200	6938100	P05198|IF2A_HUMAN
TKTEISEMNR	3.3	48503000	35979000	15889000	18262000	P05787|K2C8_HUMAN
SSVPPSK	3.4	16101000	23024000	18741000	12405000	O14924|RGS12_HUMAN
LDYILGLK	4.1	10092000	8342200	10878000	8606000	P46781|RS9_HUMAN
SLLVNPEGPTLMR	2.5	11551000	6003500	13738000	14765000	P49327|FAS_HUMAN
GPPVSELITK	12.6	19268000	38711000	17491000	18873000	P16403|H12_HUMAN:P10412|H14_HUMAN:P16402|H13_HUMAN:P16401|H15_HUMAN
QLEEAEEEAQR	2.9	5352400	8499300	6989700	5393200	P35579|MYH9_HUMAN
VSQAAADLK	11.5	6808300	15878000	1162500	6993400	P63218|GBG5_HUMAN
AQYEEMAK	2.8	8463700	9855600	6586000	4231000	P08729|K2C7_HUMAN
YYIQQDTK	3.6	2210700	5789700	1878600	658930	P07355|ANXA2_HUMAN
NGVYLAK	9.5	1515000	1750700	2090600	1904700	P46940|IQGA1_HUMAN:Q13576|IQGA2_HUMAN
ARFEELNADLFR	3.7	24898000	15105000	8281000	7114000	P11142|HSP7C_HUMAN:P54652|HSP72_HUMAN
GALQYLVPILTQTLTK	2.4	6073800	0	4537500	6505900	Q14974|IMB1_HUMAN
LFIGGLNTETNEK	3.2	27118000	21964000	19506000	20893000	P38159|RBMX_HUMAN
QTYSTEPNNLK	3.4	15424000	19453000	12492000	8890100	P46779|RL28_HUMAN
NLANTVTEEILEK	3.8	21402000	11495000	11328000	10692000	O60506|HNRPQ_HUMAN
EVGSIIGK	4.4	9844000	12392000	11869000	9571300	Q15365|PCBP1_HUMAN:Q15366|PCBP2_HUMAN
IDEPLEGSEDR	3.9	31166000	51535000	34431000	29430000	P61978|HNRPK_HUMAN
GTTAVLTEK	3.3	3088100	4279000	3969300	3236000	Q99436|PSB7_HUMAN
VSSDVIDQK	3	1869400	2702100	2162200	1411200	Q9Y262|EIF3L_HUMAN
GATQQILDEAER	7.1	7759600	9273600	11027000	9810300	P78371|TCPB_HUMAN
ELEEWYAR	3.8	5027600	3513700	5894600	7526900	P09496|CLCA_HUMAN
LVLVGDGGTGK	3.9	41569000	53186000	49997000	41993000	P62826|RAN_HUMAN
SGYLSSER	3.4	2516700	3829000	2891600	2370600	P15311|EZRI_HUMAN
SINNPDMR	7.4	3969100	5521600	5200100	3884300	P53396|ACLY_HUMAN
NGSVDETPK	7.4	3969100	5521600	5200100	3884300	Q96Q15|SMG1_HUMAN
ILEFFGLK	3.7	3154000	1132600	2125200	2037800	P07237|PDIA1_HUMAN
EMDEAATAEER	3.2	1359700	2123800	1368800	894860	Q04637|IF4G1_HUMAN
AAEAAAAPAESAAPAAGEEPSKEEGEPK	3.1	92305000	69834000	72041000	63186000	P80723|BASP1_HUMAN
FIDTTSK	2.9	12733000	21804000	9492300	6399200	P39023|RL3_HUMAN
SINQQSGAHVELQR	3	2925100	3374200	2397500	1663900	Q96I24|FUBP3_HUMAN
VPDVQDGVR	9.2	4931800	10821000	3191900	2807300	Q15149|PLEC_HUMAN
VQQLVPK	3.1	9651800	13492000	11889000	10870000	O43707|ACTN4_HUMAN
AVTEQGHELSNEER	3.5	23693000	44542000	20802000	21985000	P31946|1433B_HUMAN
HTGPNSPDTANDGFVR	3.7	36281000	42555000	28012000	21565000	P31943|HNRH1_HUMAN:P55795|HNRH2_HUMAN
GVDEVTIVNILTNR	3.3	50649000	18687000	26142000	23400000	P07355|ANXA2_HUMAN
VIPELNGK	4	78498000	174860000	14036000	104520000	P04406|G3P_HUMAN
TNQIGTVNDR	4.1	2441100	718160	4476500	4068200	P53990|IST1_HUMAN
SLESINSR	3.7	12155000	15363000	11477000	8237800	P62888|RL30_HUMAN
TVLVNADGEEVAMR	7.2	7745400	24821000	579890	938980	Q03252|LMNB2_HUMAN
DYSSGFGGK	4.6	971090	1987600	1128000	768720	Q14247|SRC8_HUMAN
LLESKEELDSLMTDETIANVPILILGNK	17	555010	0	0	441790	Q9Y6B6|SAR1B_HUMAN
EAGEQGDIEPR	2.8	8473300	12895000	5053700	4493200	Q13283|G3BP1_HUMAN
MEELHNQEVQK	3.7	7273800	5981000	5975700	3507200	Q15233|NONO_HUMAN
DIGKPIEK	3.4	1712100	2910500	1811800	1473100	O60869|EDF1_HUMAN
A(+42.01)EVQVLVLDGR	3.4	13456000	957400	5809500	8132000	P40429|RL13A_HUMAN
VVSSSIVDK	4.2	1102400	1373800	1748900	1286900	P62333|PRS10_HUMAN
AIEENNNFSK	2.9	14393000	24845000	17460000	13390000	P16949|STMN1_HUMAN
NVIGLQMGTNR	3.4	17454000	19359000	24807000	19885000	P37802|TAGL2_HUMAN
EIPSATQSPISK	6.2	5327600	4342600	4899600	5726700	Q9BQG0|MBB1A_HUMAN
QAQIEVVPSASALIIK	3.5	38219000	20190000	28280000	30222000	P30050|RL12_HUMAN
MTQIMFETFNTPAMY	3	7914800	619560	10205000	20835000	P60709|ACTB_HUMAN:P63261|ACTG_HUMAN:Q6S8J3|POTEE_HUMAN
SVEETLR	2.8	16694000	19053000	18898000	17361000	P30048|PRDX3_HUMAN
LIAPVAEEEATVPNNK	6	70953000	52904000	100530000	106750000	P07195|LDHB_HUMAN
AAPAAEEKEEAR	10.4	4402500	477410	8677000	6258700	Q01650|LAT1_HUMAN
LVGIISSR	3.5	3432100	5393400	2917100	3298700	P12268|IMDH2_HUMAN
DAEDWFFSK	3.1	17642000	5607500	28497000	25236000	Q04695|K1C17_HUMAN
QEAADAALR	5.3	1739800	3684900	1046500	640300	P55265|DSRAD_HUMAN
TLLVADPR	10	15956000	4027100	11105000	11816000	P62249|RS16_HUMAN
TGYTLDVTTGQR	3.6	22444000	20093000	13099000	11005000	O60506|HNRPQ_HUMAN:O43390|HNRPR_HUMAN
AYTNFDAER	3	24008000	52546000	16760000	10679000	P07355|ANXA2_HUMAN
YVVVTGITPTPLGEGK	2.8	7276300	8924600	8969100	8650600	P11586|C1TC_HUMAN
DEILPTTPISEQK	3.3	44219000	55147000	42900000	49500000	P23396|RS3_HUMAN
HLTDAYFKK	9.4	24769000	22945000	34668000	26922000	Q02878|RL6_HUMAN
S(+42.01)ETAPAAPAAPAPAEK	5.1	127360000	110810000	71510000	122610000	P10412|H14_HUMAN
YTAQVDAEEK	13.8	2109000	2817900	1298400	4109200	O75947|ATP5H_HUMAN
YAWVLDK	3.8	4906000	4215300	9075900	6332700	P68104|EF1A1_HUMAN:Q05639|EF1A2_HUMAN
YGEPGEVFINK	3.2	22967000	18639000	15843000	18607000	P23246|SFPQ_HUMAN
ILHQHLGAPEER	3.5	1985600	2131100	1985100	1305100	Q9NZM1|MYOF_HUMAN
M(+42.01)DEMATTQISKDELDELKEAFAK	1.5	1132100	610420	0	1437400	P13797|PLST_HUMAN
A(+42.01)AGVEAAAEVAATEIK	3.2	14183000	9858500	18401000	20469000	P52272|HNRPM_HUMAN
IINADSEDPK	3.9	1545800	2744100	1491600	1221100	P35998|PRS7_HUMAN
PALENSLK	7.7	3937800	3203800	6103600	5605500	P42330|AK1C3_HUMAN
TVENVTVFGTASASK	3.2	2339600	2746600	2444900	3271800	Q99536|VAT1_HUMAN
TPVEVPVGGFK	3.8	9799000	12026000	11409000	10277000	Q15149|PLEC_HUMAN
QDEHGYISR	7	13456000	28068000	14902000	10167000	P04792|HSPB1_HUMAN
NQNDPLPGR	3.6	1386000	2481000	1442300	1094300	O75534|CSDE1_HUMAN
DLQMVNISLR	4.5	52950000	85563000	5130400	105180000	Q99623|PHB2_HUMAN
AAATAEEPDPK	3.6	1983600	3814700	1649800	1254300	Q99733|NP1L4_HUMAN
AAAAAAALQAK	3.4	23652000	17875000	12559000	11612000	P36578|RL4_HUMAN
A(+42.01)DGQVAELLLR	3.3	2510500	2457500	2511300	1909900	Q9Y285|SYFA_HUMAN
LATALQK	3.5	6610300	8893500	7392100	6838400	P67936|TPM4_HUMAN:P06753|TPM3_HUMAN:P07951|TPM2_HUMAN:P09493|TPM1_HUMAN
GSGTAEVELKK	3.5	23395000	40092000	26506000	15280000	P14618|KPYM_HUMAN
VDIEAPDVSLEGPEGK	3.5	4642500	5143300	5133800	4430200	Q09666|AHNK_HUMAN
AGNFYVPAEPK	3.4	19976000	18191000	16615000	16140000	P18124|RL7_HUMAN
SLVPAAELLESR	3.1	10150000	9239200	11229000	9189000	Q15149|PLEC_HUMAN
EKYEITEQR	3.2	6152400	10646000	5293400	3771600	Q02878|RL6_HUMAN
GDLGIEIPAEK	3.8	133320000	124770000	193920000	192940000	P14618|KPYM_HUMAN
EVYPEAR	3	1675800	1817200	1165100	831380	O00422|SAP18_HUMAN
LQAEEVAQQK	3.9	5204200	7144700	5296400	4357900	Q15149|PLEC_HUMAN
FYEQFSK	3.8	16090000	20132000	11127000	10797000	P07900|HS90A_HUMAN
IQEAGTEVVK	3.8	6611900	10034000	4870100	3794700	P40926|MDHM_HUMAN
LLEPVLLLGK	4.3	31018000	20066000	27244000	16355000	P62249|RS16_HUMAN
NEISEMNR	3.3	13045000	14979000	14067000	9485300	P08729|K2C7_HUMAN
DLYANTVLSGGTTMYPGIADR	3.4	245360000	14728000	269920000	343680000	P60709|ACTB_HUMAN:P63261|ACTG_HUMAN
NIDDGTSDRPYSH	3.4	1276600	2248700	1835100	885360	P61353|RL27_HUMAN
GVVDSEDLPLNISR	4.9	143040000	146580000	159220000	133500000	P08238|HS90B_HUMAN:P07900|HS90A_HUMAN
SEVDMLK	3.1	22417000	38173000	14561000	10308000	P07355|ANXA2_HUMAN
TVFDEAIR	3.3	6135800	5558100	6045700	5643000	P63000|RAC1_HUMAN
S(+42.01)AHLQWMVVR	3.4	26662000	2260300	10338000	8511800	P46779|RL28_HUMAN
TAFQEALDAAGDK	3.3	87551000	78545000	127820000	138580000	P10599|THIO_HUMAN
NQQIFLR	9.7	4695400	5189000	6590700	6290500	P62993|GRB2_HUMAN
LPVEVAYK	9.7	4695400	5189000	6590700	6290500	Q15149|PLEC_HUMAN
ILATPPQEDAPSVDIANIR	3.7	102680000	139810000	76503000	158600000	P29401|TKT_HUMAN
IIEDQQESLNK	4.3	6696500	9380300	8543800	6999800	P05455|LA_HUMAN
MSVEADINGLRR	5	25490000	29778000	30618000	33577000	P08727|K1C19_HUMAN:P02533|K1C14_HUMAN
YLIPNATQPESK	5	25490000	29778000	30618000	33577000	P31946|1433B_HUMAN
ALDVMVSTFHK	3.3	64642000	11469000	34500000	28895000	P26447|S10A4_HUMAN
PVGAANFR	6.8	7466600	10860000	13683000	1583900	P06733|ENOA_HUMAN
GFHQVPFAPIVFIER	3.4	1961300	2084400	1592900	1676200	P47897|SYQ_HUMAN
EVSSATNALR	6.8	4617900	4155400	3233800	4186900	P09012|SNRPA_HUMAN
TYGEPESAGPSR	2.5	3384800	4586300	1984500	1294600	P50402|EMD_HUMAN
DLQQYQSQAK	2.6	3409700	3312500	3269700	2853100	O75396|SC22B_HUMAN
DITSDTSGDFR	3	20132000	18950000	18871000	19344000	P04083|ANXA1_HUMAN
VNFTVDQIR	3.7	16732000	17200000	13656000	17004000	P13639|EF2_HUMAN
KVEEDLK	3.5	1432900	2400800	1803800	1248300	P50502|F10A1_HUMAN
IHGVGFK	3.2	5653900	6421000	3028400	2979400	P62899|RL31_HUMAN
YFDPANGK	3.5	13629000	23383000	16063000	10863000	P13639|EF2_HUMAN
ILGPGLNK	2.9	22355000	22041000	12507000	12756000	P62906|RL10A_HUMAN
QFSQYIK	3.4	11942000	8111000	4871900	5590500	P46777|RL5_HUMAN
YPASTVQILGAEK	3	4941000	2988600	2913600	2687400	O00567|NOP56_HUMAN
KGDIVDIK	2.8	19866000	14267000	13118000	11325000	P46778|RL21_HUMAN
MEGGTENDLR	3.4	1260000	1717500	1050100	788070	Q9BXP5|SRRT_HUMAN
AQLEPVASPAK	4	5404500	6662300	6324400	4877500	Q15149|PLEC_HUMAN
LLQDFFNGK	4.3	30153000	53735000	25695000	19883000	P11142|HSP7C_HUMAN:P54652|HSP72_HUMAN
QLASGLLLVTGPLVLNR	1.7	10860000	935510	7799900	7644300	Q02878|RL6_HUMAN
QILDEAGK	9.1	1665300	1554600	2669700	2135200	P18206|VINC_HUMAN
NFILDQTNVSAAAQR	3.3	51947000	29175000	32778000	28632000	Q00839|HNRPU_HUMAN
DLEAHIDSANK	4.8	10678000	15403000	13436000	10274000	P35579|MYH9_HUMAN
YNILGTNTIMDK	3.4	39631000	23805000	28263000	29827000	Q00839|HNRPU_HUMAN
EAAEMGK	2.8	86416	86050	118280	136900	P68104|EF1A1_HUMAN:Q05639|EF1A2_HUMAN
GIAYIEFK	4	12601000	13923000	7792700	8575400	P19338|NUCL_HUMAN
IGGNEGIDVPIPR	2.9	7775900	8669700	8544600	7978500	Q96AE4|FUBP1_HUMAN
EEAQVTPDSDK	11.6	832270	1139100	910900	510890	O75369|FLNB_HUMAN
AFITNIPFDVK	3.6	15493000	9425500	7589700	6674300	P52272|HNRPM_HUMAN
VRQEESEQIK	12.5	6527900	14456000	6089300	2708900	P08729|K2C7_HUMAN
LNEAQPSTIATSMR	3	6853000	5308300	5735500	6870100	P56537|IF6_HUMAN
LLEQYKEESK	2.9	11765000	2883900	9977300	10037000	Q00839|HNRPU_HUMAN
QGYGEGFR	3.4	1885700	2642600	1831800	1230300	Q9NR31|SAR1A_HUMAN:Q9Y6B6|SAR1B_HUMAN
FVIGGPQGDAGLTGR	3.6	7373200	9969600	8334700	7210800	P31153|METK2_HUMAN
GLEGERPAR	3.6	3036600	6487200	2590700	2580300	P46783|RS10_HUMAN
YIQHTYR	4.7	831720	2328600	744110	254140	P52565|GDIR1_HUMAN
SNNVEMDWVLK	2.8	13104000	817620	8649400	8121100	P31943|HNRH1_HUMAN
VTQSNFAVGYK	7.2	8475400	3617900	2460800	1705600	P21796|VDAC1_HUMAN
EVFEMATR	3.5	7756300	7585600	8946700	8329800	P61586|RHOA_HUMAN:P08134|RHOC_HUMAN
TGISDVFAK	6.5	42490000	58947000	30133000	25307000	P19338|NUCL_HUMAN
YQIDDKPNNQIR	5.9	5210000	8290000	6212800	5087800	Q9NP92|RT30_HUMAN
YFTEAGLK	4	3685400	5024000	3225100	3006400	Q7L1Q6|BZW1_HUMAN
GQLEQITGK	3.4	2251100	2976400	1987900	1514900	Q5SSJ5|HP1B3_HUMAN
AEGPGLSR	4.6	5143900	10753000	4986900	4835900	P21333|FLNA_HUMAN
FEETTADGR	8.6	5121100	9619200	4454300	3646300	Q01469|FABP5_HUMAN
GVTFLFPIQAK	3.5	6747600	3357600	2580100	1883000	Q9NR30|DDX21_HUMAN
S(+42.01)IHFSSPVFTSR	3.4	25473000	14048000	12056000	10174000	P08729|K2C7_HUMAN
FQTMEEK	3.8	10694000	10426000	7790900	5874100	P39023|RL3_HUMAN
S(+42.01)DKPDMAEIEKFDK	3	49373000	8342400	60038000	51385000	P62328|TYB4_HUMAN
EAALEPSMEK	10.5	2193100	4072200	477150	1266300	Q9H3K2|GHITM_HUMAN
YKPESEELTAER	3.1	8578900	5467900	4432300	4532800	P07237|PDIA1_HUMAN
FSPLTTNLINLLAENGR	2	3176100	189760	636250	1823800	P48047|ATPO_HUMAN
DDEVAQLKK	10	2119400	2180500	2826700	2743400	P07195|LDHB_HUMAN
IVAVTGAEAQK	12	1643700	1821400	1856700	2057200	P49588|SYAC_HUMAN
MAPALSGANLTSPR	9.2	1745200	1064700	2568600	1281800	Q9UQ35|SRRM2_HUMAN
TVLELQYVLDK	3.4	2180600	621280	2394500	2731000	Q14444|CAPR1_HUMAN
KAFMGPLKK	5.9	2514000	1824000	744010	371000	P39023|RL3_HUMAN
ALLFVPR	3.8	7796300	8473200	2969200	4153100	P07900|HS90A_HUMAN
KGSVPLGLATVLQDLLR	0.6	1392800	0	2376900	3112400	Q8WUX9|CHMP7_HUMAN
LASVPAGGAVAVSAAPGSAAPAAGSAPAAAEEK	2.9	74606000	83147000	61489000	53983000	P05387|RLA2_HUMAN
ADEGISFR	3.5	64637000	82896000	81158000	78382000	Q06830|PRDX1_HUMAN
QFTSSSSIK	3.2	8435000	10821000	10033000	6949900	Q04695|K1C17_HUMAN
PGGDTIFGK	3.7	18375000	25037000	24173000	20018000	P49773|HINT1_HUMAN
AAAMANNLQK	11	2293800	2583400	548120	1761400	Q14498|RBM39_HUMAN
AIADTGANVVVTGGK	2.5	9082700	11234000	11060000	9039000	P50990|TCPQ_HUMAN
LLEAAAQSTK	4.2	6467500	7726000	7086900	5788500	Q15149|PLEC_HUMAN
GQGSSPVAMQK	2.3	1706700	1189400	3053300	2271500	P18206|VINC_HUMAN
DNQLSEVANK	3.9	5574300	6455600	4476500	4068200	Q14978|NOLC1_HUMAN
AIGTEPDSDVLSEIMHSFAK	7.5	1777900	209670	3199100	3601700	O00410|IPO5_HUMAN
LSLEGDHSTPPSAYGSVK	3.1	181260000	156300000	185590000	182100000	P07355|ANXA2_HUMAN
FIMESGAK	3.5	7808600	7712400	8946900	7570300	P23396|RS3_HUMAN
TVTAMDVVYALK	3.7	660400000	292470000	703070000	636630000	P62805|H4_HUMAN
ALELTGLK	3.8	22674000	16518000	17124000	18339000	P19338|NUCL_HUMAN
IFVGGLSPDTPEEK	7.4	47948000	48626000	41087000	39784000	Q14103|HNRPD_HUMAN
M(+42.01)DKNELVQK	3	29245000	30953000	37287000	35322000	P63104|1433Z_HUMAN
SDYDGIGSR	6.5	3396700	3660400	1800500	4231000	O00571|DDX3X_HUMAN
MGLAMGGGGGASFDR	3.3	7831000	2066400	2171900	2722300	P52272|HNRPM_HUMAN
MPSLPSYK	4.1	33771000	58943000	18192000	48747000	P29401|TKT_HUMAN
MEPSSLELPADT	3.1	3201900	1039100	4830100	5698200	Q16719|KYNU_HUMAN
ATGPPVSELITK	9	36809000	3553000	73384000	63448000	P16401|H15_HUMAN
IFSAEIIYHLFDAFTK	8.5	1273600	0	1711200	1836300	O60841|IF2P_HUMAN
LGDSHDLQR	7.2	1786600	2627600	2147600	1394000	Q13813|SPTN1_HUMAN
ATLSSIR	9.5	56483000	92927000	65649000	51694000	P46779|RL28_HUMAN
IGNTGGMLDNILASK	3.5	9795600	5876400	16847000	13697000	P53396|ACLY_HUMAN
GDGVVLVAPPLR	3.3	2331400	2292800	2544100	2575900	P62310|LSM3_HUMAN
DYETATLSDIK	4.9	9755600	10881000	13339000	14803000	O43707|ACTN4_HUMAN
LLILEQLLDSIK	2.9	69715	0	0	246050	Q86XA9|HTR5A_HUMAN
S(+42.01)SGIHVALVTGGNK	10.4	4221200	2845200	6476900	6059000	P16152|CBR1_HUMAN
AVPVPNMTPSGVGR	10.4	4221200	2845200	6476900	6059000	Q6P996|PDXD1_HUMAN
SVGEVMAIGR	3.3	7498600	2654200	2279000	3187600	P31327|CPSM_HUMAN
FIEIAAR	4.3	25560000	18870000	14608000	12247000	Q00839|HNRPU_HUMAN
STTTGHLIYK	3.6	147630000	201640000	162950000	123810000	P68104|EF1A1_HUMAN:Q05639|EF1A2_HUMAN
VSDTVVEPYNATLSVH	2.1	9384700	10738000	15197000	11330000	P07437|TBB5_HUMAN:P68371|TBB4B_HUMAN:Q13885|TBB2A_HUMAN:Q9BUF5|TBB6_HUMAN
KPAAGLSAAPVPTAPAAGAPLMDFGNDFVPPAPR	3.1	22962000	5946400	14355000	16060000	Q9NQC3|RTN4_HUMAN
GANPVEIRR	4.3	8746600	8517600	6615100	8546500	P10809|CH60_HUMAN
LVQSPNSYFMDVK	5.2	32010000	19963000	46694000	7909500	P42677|RS27_HUMAN:Q71UM5|RS27L_HUMAN
LSELEAALQR	2.6	149370000	98660000	100550000	103330000	P05787|K2C8_HUMAN
M(+42.01)DGIVPDIAVGTK	2.8	5057300	1422800	6432900	5677300	P26599|PTBP1_HUMAN
GQLEALQVDGGR	3.2	9933100	5775300	11245000	10942000	P08729|K2C7_HUMAN
A(+42.01)ASTASHRPIK	3.1	600940	829710	447370	317120	P41236|IPP2_HUMAN
TVTAAGAENIQQK	2.8	516660	753630	547270	478500	Q29RF7|PDS5A_HUMAN
NQTAEKEEFEHQQK	1.3	10344000	543740	26940000	13414000	P11142|HSP7C_HUMAN
SILLSVPLLVVDNK	1	578450	109640	917530	1286700	P53621|COPA_HUMAN
RLQSIGTENTEENR	3.5	11923000	24156000	2338600	19459000	P04075|ALDOA_HUMAN
ITPSYVAFTPEGER	3.4	28489000	7052600	5611900	7711800	P11021|BIP_HUMAN
VQISPDSGGLPER	3.1	5269600	7868000	5087700	5491500	Q92945|FUBP2_HUMAN
SGKPAELLK	3.3	21716000	46851000	8180700	22425000	P29401|TKT_HUMAN
EDLTEIR	3.6	12294000	15373000	15660000	13295000	P05388|RLA0_HUMAN
YEGERPLTK	2.9	13358000	2383200	26428000	21769000	P11021|BIP_HUMAN
NIIHGSDSVESAEK	4.3	25783000	40468000	28795000	27532000	P15531|NDKA_HUMAN
ADVVVSGPK	3.3	4471500	6624600	5318700	3973100	Q09666|AHNK_HUMAN
PAATEAPSSTPK	2.8	2129200	3068800	2537200	2006600	P80723|BASP1_HUMAN
LLEEALLR	3.9	3910100	4187100	3951900	3297300	P78527|PRKDC_HUMAN
NPQNSSQSADGLR	9	5185600	6754300	3275100	1810900	P0DN76|U2AF5_HUMAN:Q01081|U2AF1_HUMAN
FAGVDIR	3.7	10801000	11445000	7086000	7957700	P62249|RS16_HUMAN
DYDDMSPR	4	10761000	11686000	8465600	6379300	P61978|HNRPK_HUMAN
TPGPGAQSALR	3.9	21965000	16789000	12052000	10233000	P62263|RS14_HUMAN
AIIIFVPVPQLK	1.5	14909000	2226900	6466800	7779700	P62081|RS7_HUMAN
FLQEEAEK	4.1	6874900	12927000	5449900	5232000	Q15149|PLEC_HUMAN
AEGDVAALNR	9.1	3797500	5885900	5260800	3409000	P67936|TPM4_HUMAN
LEDLLQDAQDEK	4.8	5175300	9067800	4174200	6486500	Q15149|PLEC_HUMAN
GIHEDSTNR	3.8	2597600	3655900	2187400	2998300	P08238|HS90B_HUMAN
IISTTASK	2.9	1742800	955080	687730	1803000	O95292|VAPB_HUMAN
SAAAAAANRKR	3.9	23152000	18173000	12369000	12207000	O43861|ATP9B_HUMAN
VSVGIHK	9.1	665340	117130	643380	514530	P23921|RIR1_HUMAN
EIDLVNRDPK	9.1	2282900	1659700	2572300	2752300	Q03135|CAV1_HUMAN
LAVDEEENADNNTK	2.6	12046000	6310600	4752400	4343200	P02786|TFR1_HUMAN
DNNLLGK	4.1	18913000	35390000	20595000	12939000	P11142|HSP7C_HUMAN:P54652|HSP72_HUMAN
NFLVFQGAVESIAMK	9.9	7707100	2831400	11736000	14651000	Q14683|SMC1A_HUMAN
EAPAQPAPEK	3.8	1842000	3099200	1215600	2307400	Q15428|SF3A2_HUMAN
DGEQHEDLNEVAK	3.2	2164100	2352100	1540500	1396300	O95831|AIFM1_HUMAN
GIGTDEFTLNR	2.6	2737000	3149800	3176300	2934800	P12429|ANXA3_HUMAN
VVGAQSLK	3.6	4371700	3092400	7178300	6436500	P52209|6PGD_HUMAN
VLDFEHFLPM	10.2	982130	726050	1585900	1449700	P60660|MYL6_HUMAN
IQTYLQSTKPIIDLYEEMGK	1.1	2147100	0	2562300	4290600	P30085|KCY_HUMAN
TYSYLTPDLWK	3.1	37219000	3158400	11681000	10165000	P15880|RS2_HUMAN
NSAQGNVYVK	2.5	1068600	1053100	734830	606340	Q14498|RBM39_HUMAN
KLDKENLSDER	5.7	1034900	1621600	1072500	573130	Q9BZI7|REN3B_HUMAN
AEGAATEEEGTPK	2.8	16828000	21475000	10637000	7246500	P80723|BASP1_HUMAN
LEVAPISDIIAIK	2.7	2468500	705170	879530	1115600	P13804|ETFA_HUMAN
VLTPTQVK	3.5	8960900	12177000	11645000	9381100	P30086|PEBP1_HUMAN
ETEGDVTSVK	3.6	4025300	6824000	4546000	3573900	P50990|TCPQ_HUMAN
FSMVVQDGIVK	3.3	8767600	7075600	12306000	13087000	P30044|PRDX5_HUMAN
DYDAMGSQTK	2.5	1095400	1681000	1243200	796500	Q9Y230|RUVB2_HUMAN
GPAGDATVASEKESVM	4.2	19048000	1042900	37396000	33880000	Q15758|AAAT_HUMAN
VAVEEVDEEGK	3	21510000	31681000	28170000	23016000	P02545|LMNA_HUMAN
AGLVGPEFHEK	3.4	7029900	7389000	7322700	7970600	Q15149|PLEC_HUMAN
QYDELAR	9.1	2372300	3194900	3881600	2130000	P05783|K1C18_HUMAN
A(+42.01)GGEAGVTLGQPHLSR	3.2	8734300	7789100	5226300	6767700	P41091|IF2G_HUMAN:Q2VIR3|IF2GL_HUMAN
ILELSGSSSEDSEK	3.1	4292100	5273300	4973000	4179300	P78527|PRKDC_HUMAN
DTNGSQFFITTVK	3.8	9463500	8171400	6002600	6866100	P23284|PPIB_HUMAN
SESVVYADIR	7.1	8261800	10588000	10511000	9525200	O95297|MPZL1_HUMAN
EEQPPETAAQR	6.8	1903100	1410900	1636300	3080800	Q96HE7|ERO1A_HUMAN
KLNVTEQEK	6	84340000	175500000	86345000	72168000	P06733|ENOA_HUMAN
DSYESYGNSR	3.6	4946200	6164700	1957200	1389400	P38159|RBMX_HUMAN
FLDSTGSR	7	2829200	1861900	4687300	3666500	Q9Y6E2|BZW2_HUMAN
SDVWSFGILQTELVTK	10.7	564620	0	515130	922040	P07947|YES_HUMAN
IGVNQPK	3.5	3568100	6274500	3836200	2824100	P78371|TCPB_HUMAN
MPDVDISVPK	3.4	3101200	3088400	4983700	3575200	Q09666|AHNK_HUMAN
GEFTIETEGK	7	3587100	3317000	3691900	3461000	P41250|GARS_HUMAN
NKPGVYTK	4	175760	328350	190350	184320	P07477|TRY1_HUMAN
AATAAADFTAK	2.9	3876100	4913500	4334500	3042500	Q9Y3F4|STRAP_HUMAN
GTIEILSDVQLIK	2.7	19191000	489920	7878500	10300000	P05388|RLA0_HUMAN
VAIDVGYR	3.4	3243500	4973100	4807300	769230	P15121|ALDR_HUMAN
RPYDLDR	10.3	2457000	4130000	2803500	1976500	Q15424|SAFB1_HUMAN:Q14151|SAFB2_HUMAN
TTDGYLLR	3.7	13777000	12775000	11569000	10377000	P61247|RS3A_HUMAN
RLEVLDSTK	11.9	1687300	1606400	721970	1415900	P47985|UCRI_HUMAN
GTVVTGTLER	6.4	6368300	1853000	1894800	2778900	P49411|EFTU_HUMAN
GKPQGTVAR	5.9	739910	435740	269940	154990	P27635|RL10_HUMAN
VAAIEALNDGELQK	3	12948000	17604000	13158000	16352000	P50502|F10A1_HUMAN
DMFQETMEAMR	4.5	3924500	2929900	6153200	6614800	P35579|MYH9_HUMAN
EHALTSGTIK	7	3414700	4420300	5723700	1689400	Q15369|ELOC_HUMAN
ISSLNENAAK	7.3	17954000	18025000	21896000	29714000	Q9P212|PLCE1_HUMAN
LLDTAFDLDVFK	2.5	1354300	703040	1661200	1574400	Q02218|ODO1_HUMAN
IIEVSGQK	3.7	2782100	4563300	3345400	2292700	P61106|RAB14_HUMAN
QQFEGYGLEIPDILNASNLK	0.8	127390	0	0	117640	Q96EY4|TMA16_HUMAN
RDELLAQHAAGALGLPDLVAVLTR	1.5	6510500	0	3020800	7445800	P58107|EPIPL_HUMAN
A(+42.01)ANATTNPSQLLPLELVDK	0.9	2093500	1456300	2165700	1858900	Q9Y4Y9|LSM5_HUMAN
SVTEQGAELSNEER	3.5	36869000	54652000	42927000	38428000	P63104|1433Z_HUMAN
HYTEAIK	12.5	3892900	5674100	2849100	5915500	P31948|STIP1_HUMAN
IQEGVFDINNEANGIK	4.1	3682300	3185500	3611000	3022600	P61019|RAB2A_HUMAN
AVDFAER	3.1	13613000	8671700	8284600	6379300	P62917|RL8_HUMAN
SDPFLEFFR	3.6	873980	951540	986850	762910	Q99829|CPNE1_HUMAN
TMQNLNDR	7.5	5507900	3593300	4175300	3091100	Q04695|K1C17_HUMAN:P08727|K1C19_HUMAN:P13645|K1C10_HUMAN:P02533|K1C14_HUMAN:P08779|K1C16_HUMAN:P13646|K1C13_HUMAN:Q9C075|K1C23_HUMAN
IITLTGPTNAIFK	3.1	11634000	5854600	6100200	3950800	Q15365|PCBP1_HUMAN
ILDIDNVDLAMGK	11	2184900	0	3477000	2693400	O43615|TIM44_HUMAN
YSFLQFDPAPR	3.5	3478000	3367700	3257000	2889600	P67775|PP2AA_HUMAN
IGVPSATEIIK	2.4	9284700	5506000	5526200	3928800	Q9NR30|DDX21_HUMAN
AQAVSEDAGGNEGR	4	2295800	4670700	1358300	1089400	P55884|EIF3B_HUMAN
VVDALGNAIDGK	3.8	8593500	6459900	8049100	9542100	P25705|ATPA_HUMAN
KDVGRPQPGR	13.2	6374400	11127000	1393100	4166500	P37802|TAGL2_HUMAN
AVAPSIIFFDELDALAVER	5.2	959900	254470	1666100	1606100	Q8NB90|AFG2H_HUMAN
EGQEDQGLTK	5.7	5737000	14396000	4204900	4347100	P26599|PTBP1_HUMAN:O95758|PTBP3_HUMAN
IQQLEALQR	3.9	3072800	4211500	4166400	3913300	P30838|AL3A1_HUMAN
GLPNVQR	6.4	27729000	1509700	2115200	1759600	O75874|IDHC_HUMAN
LDSTDFTGTIK	10	93645000	75924000	132060000	148750000	P02786|TFR1_HUMAN
HLEGLSEEAIMELNLPTGIPIVYELDK	2.2	437460	0	223580	269300	P18669|PGAM1_HUMAN
FLIPNASQAESK	3.4	37782000	44096000	43539000	52048000	P63104|1433Z_HUMAN
TIVFVETK	3.4	6472200	7728100	4644800	4011500	P17844|DDX5_HUMAN
EMQPTHPIR	3.3	34033000	43957000	49466000	34969000	P31946|1433B_HUMAN:P63104|1433Z_HUMAN:P27348|1433T_HUMAN
ALPSEELNR	3.8	2514700	3539800	2546600	2479900	Q04637|IF4G1_HUMAN
ESDLNGAQIK	3.7	2652400	4679500	3352700	2199800	P20700|LMNB1_HUMAN
SFKPDFGAESIYGGFLLGVR	3.6	4285300	1136300	6707700	8152900	P35606|COPB2_HUMAN
EANNFLWPFK	2.9	15215000	3591100	10864000	6944600	P18124|RL7_HUMAN
IFDEILVNAADNK	4	6288200	1645600	1668700	2302500	P11388|TOP2A_HUMAN:Q02880|TOP2B_HUMAN
DATNVGDEGGFAPNILENK	4.4	162130000	222130000	200580000	206680000	P06733|ENOA_HUMAN
DYPDFSPSVDAEAIQK	3	3096000	4829300	2360000	3293800	P12429|ANXA3_HUMAN
ATLQEILPEVLK	2.7	3355700	1243300	1210300	925620	Q9BQG0|MBB1A_HUMAN
LDQPMTEIVSR	3.3	12348000	10330000	18579000	16823000	P22314|UBA1_HUMAN
GIVTNWDDMEK	6	14880000	10925000	31005000	16881000	P60709|ACTB_HUMAN:P63261|ACTG_HUMAN
LFEGNALLR	4.2	25919000	17431000	10559000	10285000	P46781|RS9_HUMAN
EDAANNYAR	12.6	20855000	81693000	1389000	336170	Q9BQE3|TBA1C_HUMAN:P68366|TBA4A_HUMAN:A6NHL2|TBAL3_HUMAN
LLPGELAK	3.4	47552000	61245000	60496000	61252000
IDKPILK	2.7	11155000	10322000	8213100	7287900	P62917|RL8_HUMAN
KAQQELEEQTR	5.1	11926000	4563000	3012300	3125500	P26038|MOES_HUMAN
VLEAAAQAAR	3.3	998290	1374700	981720	756750	Q9NPD3|EXOS4_HUMAN
EIEVGGGR	10.6	4720000	1130200	10562000	6521400	P62081|RS7_HUMAN
EM(+15.99)GTPDVR	3.5	4835500	7073100	6245800	4773500	P62899|RL31_HUMAN
KIYEDGDDDMKR	3.9	894510	924360	816140	446570	Q9HB71|CYBP_HUMAN
INPDGSQSVVEVPYAR	2.9	3355500	1832400	668320	1477500	Q9Y2B0|CNPY2_HUMAN
EVYQQQQYGSGGR	3.1	8831400	13031000	3560600	2939800	Q99729|ROAA_HUMAN
TTQVPQFILDDFIQNDR	2.7	12094000	1952600	4220700	4781900	Q08211|DHX9_HUMAN
FTVAELK	3.3	1606900	1891700	1378200	1358300	Q13435|SF3B2_HUMAN
FDSDAASQR	3.7	2862700	8008800	1126200	1175200	P04439|HLAA_HUMAN
ATIGADFLTK	3.1	5004900	4271300	3564300	3575300	P51149|RAB7A_HUMAN
IGRLVTR	4.7	13581000	14600000	19607000	20118000	P04406|G3P_HUMAN
TEELATLPK	4.3	8613000	4730800	13011000	15073000	Q8NCM8|DYHC2_HUMAN
QNGDDPLLTYR	3.1	19567000	18917000	23958000	26106000	P02545|LMNA_HUMAN
VLDELTLAR	3.9	19199000	9746900	15449000	16205000	Q04695|K1C17_HUMAN:P08727|K1C19_HUMAN:P02533|K1C14_HUMAN:P08779|K1C16_HUMAN
SIGTANRPMGAGEALR	5.8	4875400	4953000	6766700	4733400	Q12906|ILF3_HUMAN
MVVPAALK	3.5	15372000	4312100	7702200	8014600	P40429|RL13A_HUMAN
FEGNALLR	11.8	20882000	6115200	6042300	5237100	P46781|RS9_HUMAN
LITEDVQGK	3.5	36409000	38513000	25428000	24562000	P61247|RS3A_HUMAN
APGTPHSHTKPYVR	1	14201000	0	4968200	4159100	Q07020|RL18_HUMAN
GGVVGIK	3.6	16983000	23164000	24840000	19022000	P04075|ALDOA_HUMAN
IPDWFLNR	3.5	32896000	5023400	1014400	9989700	P62269|RS18_HUMAN
GGADVNIR	4.2	7609400	10558000	10051000	7988100	P08621|RU17_HUMAN
GTLDPVEK	3.1	25165000	37704000	22577000	18605000	P11142|HSP7C_HUMAN
AVANETGAFFFLINGPEIMSK	1.7	2247600	0	806440	1758200	P55072|TERA_HUMAN
QTAAQLILK	3.8	5857100	6634300	8330100	7320700	O75367|H2AY_HUMAN
LGQASLGVIK	3.8	5857100	6634300	8330100	7320700	Q8WTT2|NOC3L_HUMAN
FPGYDSESK	3.7	10074000	14065000	14184000	8751800	P46777|RL5_HUMAN
NQVGDENWR	3.6	1892100	1982900	2680600	1765600	Q92973|TNPO1_HUMAN
GGGQIIPTAR	3.3	27137000	35581000	28763000	27719000	P13639|EF2_HUMAN:Q15029|U5S1_HUMAN
EEAAVDAQQQK	7.5	669800	1506100	749340	216790	Q15149|PLEC_HUMAN
A(+42.01)AGTAAALAFLSQESR	2.3	5917300	1069200	891410	1033100	O75607|NPM3_HUMAN
AGGFLMK	3.4	7711400	7947500	7620200	10268000	P00558|PGK1_HUMAN
LNVTEQEK	13.4	28897000	47342000	31786000	28060000	P06733|ENOA_HUMAN
SGVSLAALK	4.5	30247000	20355000	23679000	14095000	P16403|H12_HUMAN:P10412|H14_HUMAN:P16402|H13_HUMAN
IEFVVVGPEAPLAAGIVGNLR	1.4	175510	0	114340	424510	P22102|PUR2_HUMAN
LQGQLEQGDDTAAER	3.1	1542000	2366700	1326600	1174600	Q8NE71|ABCF1_HUMAN
VMEPLTASR	10.1	3631900	2833500	5235800	4434900	Q9NQ55|SSF1_HUMAN
SEPVKEESSELEQPFAQDTSSVGPDR	3.1	5321600	2689200	5613500	5295700	Q15424|SAFB1_HUMAN:Q14151|SAFB2_HUMAN
TDYNASVSVPDSSGPER	3.6	41780000	45782000	31970000	28237000	P61978|HNRPK_HUMAN
ELLTSFGPLK	3.8	3631600	4191700	3639400	2633000	P26368|U2AF2_HUMAN
DGMDNQGGYGSVGR	3.2	5798800	3923800	3067100	2415200	P31942|HNRH3_HUMAN
VGIISSR	9.9	1047100	418880	1968800	1277300	P12268|IMDH2_HUMAN
AAQEEYVK	13.6	20410000	37288000	27055000	16258000	P04075|ALDOA_HUMAN
VVSETNDTK	6.2	158920	143900	342650	111910	P05783|K1C18_HUMAN
NNASTDYDLSDK	3.4	23620000	23018000	17964000	13029000	P39023|RL3_HUMAN
A(+42.01)ASGAEPQVLVQYLVLRK	6.6	681990	302900	572050	1461200	Q6GMV3|PTRD1_HUMAN
SYLEFSEDSVQVPR	2.9	8775600	10168000	11582000	10753000	P51116|FXR2_HUMAN
TQETLSQAGQK	2.9	1598900	3189100	1528300	1051600	O43399|TPD54_HUMAN
GTAYTFFTPGNLK	3	6125800	1844600	3477000	2693400	Q92841|DDX17_HUMAN
DVMQQQLAEYQELLDVK	4	1113300	817890	2841200	529290	Q03252|LMNB2_HUMAN
ASLENSLR	3.7	43733000	27629000	19845000	19727000	P05783|K1C18_HUMAN
VDNDENEHQLSLR	3.1	73625000	70455000	55524000	73289000	P06748|NPM_HUMAN
AIDWFDGK	13	1891200	1224500	3017800	3322700	P35637|FUS_HUMAN:Q92804|RBP56_HUMAN
AGGPTTPLSPTR	4.4	14516000	8473000	5685600	35051000	P20700|LMNB1_HUMAN
WDAWNELK	3.7	7378900	3056400	13879000	12297000	P07108|ACBP_HUMAN
NLVTEDVMR	3.4	14874000	21107000	9878700	23392000	P06744|G6PI_HUMAN
VANVSLLALYK	3.5	14664000	1661100	2586300	2206600	P62266|RS23_HUMAN
LEELEAK	8.8	3658700	3660700	8565600	1583900	O60841|IF2P_HUMAN
AIFAGYKR	12.3	4634100	2681400	4200900	3139300	P18077|RL35A_HUMAN
FVEGLPINDFSR	3.5	9586900	11087000	10189000	10761000	P40925|MDHC_HUMAN
YFGGTEDR	3.5	3029500	5297800	3015000	2607100	Q16658|FSCN1_HUMAN
IFEYETQR	3.9	2642600	3394700	2188800	2463700	P50402|EMD_HUMAN
ELQEQMSR	3.3	3981400	5431100	3913100	3023200	Q7L1Q6|BZW1_HUMAN
FIIPQIVK	4	19919000	13990000	27613000	28198000	P07195|LDHB_HUMAN
SDGSAPSTSTASSK	15.5	887580	350110	825090	340800	Q96T37|RBM15_HUMAN
IQTQPGYANTLR	3.2	19326000	8493800	2941000	4393600	Q00325|MPCP_HUMAN
LTVSSLQESGLK	3.6	13756000	16612000	19629000	17996000	P21333|FLNA_HUMAN
NIILEEGK	8.1	47350000	80881000	55143000	50587000	P23528|COF1_HUMAN
AAGYDVEK	10.7	7916600	17618000	5861000	6018700	P16403|H12_HUMAN:P10412|H14_HUMAN:P16402|H13_HUMAN:Q02539|H11_HUMAN
VADNSFDAK	3.1	2923100	3830400	2046700	1574600	Q14978|NOLC1_HUMAN
VGQADDSTKPTNK	5.5	4262600	490920	1848000	2087900	P35658|NU214_HUMAN
IETIEVMEDR	3	23447000	14618000	23087000	18702000	P51991|ROA3_HUMAN
LAAIGEATR	7.9	15174000	17019000	22519000	18975000	Q15149|PLEC_HUMAN
LEAALGEAK	7.9	15174000	17019000	22519000	18975000	P02545|LMNA_HUMAN
QQAWIQK	7.9	15174000	17019000	22519000	18975000	Q9NX58|LYAR_HUMAN
DPSQQELPR	2.9	6652200	8670800	7952600	6957800	P49327|FAS_HUMAN
QLELRQEEER	14.2	2580200	2517500	2179100	2883000	Q15233|NONO_HUMAN
GFGDGYNGYGGGPGGGNFGGSPGYGGGR	2.3	17272000	12129000	18022000	11486000	P22626|ROA2_HUMAN
EDALPGQK	3.1	3451600	6035000	4093700	3024100	P35613|BASI_HUMAN
VAPAPAVVK	4.2	14285000	11599000	8366700	5880900	P62424|RL7A_HUMAN
QIFNGTFVK	3.7	11314000	6221300	9291700	11263000	P18124|RL7_HUMAN
TDEQALLSSILAK	4.6	3596300	1368000	1166000	9135800	Q6IAA8|LTOR1_HUMAN
ILGGVISAISEAAAQYNPEPPPPR	9.6	2111300	97998	2039800	5609700	P04632|CPNS1_HUMAN
GLAPDLPEDLYHLIK	2.7	31570000	6937300	20613000	22823000	P62277|RS13_HUMAN
DYVDLFR	3.8	1414200	1607900	2203500	1845300	P78527|PRKDC_HUMAN
EIAEAYLGK	3.1	17787000	26465000	23765000	17800000	P11142|HSP7C_HUMAN
A(+42.01)TNFLAHEK	3.5	30665000	30581000	32199000	41394000	P29692|EF1D_HUMAN
ALTGHLEEVVLALLK	1.5	20607000	0	2511000	5982000	P04083|ANXA1_HUMAN
DLPLLLFR	1.2	2135000	1126800	4738900	2674500	O43175|SERA_HUMAN
T(+42.01)AVHAGNINFK	10.9	2493700	3617900	2460800	1705600	P35221|CTNA1_HUMAN
LYTLVTYVPVTTFK	3.6	28253000	16735000	10311000	11050000	P62899|RL31_HUMAN
QDAQSLHGDIPQK	3	6640800	8184400	4746900	4977800	Q9NR30|DDX21_HUMAN
WSLLQQQK	9	55358000	9945300	2577700	2086300	P05787|K2C8_HUMAN
KFESTDPR	6	418640	338490	431200	460230	Q8N1F7|NUP93_HUMAN
DAEMPATEK	7.8	4669400	3541000	2383300	1581100	P21333|FLNA_HUMAN
VEAKPEVQSQPPR	2.6	4871500	6821100	3631000	2786900	Q9UN86|G3BP2_HUMAN
TQNVLGEK	3.2	11447000	16842000	15487000	9849000	P23396|RS3_HUMAN
IDDIFER	4.2	2326400	2178200	2371300	2492800	Q01082|SPTB2_HUMAN
SPEDLER	2.8	5043800	10868000	1419700	7405400	P06744|G6PI_HUMAN
VLATVTKPVGGDK	7.3	32746000	35317000	32374000	26841000	Q02878|RL6_HUMAN
PLISVYSEK	3.9	27680000	32347000	22763000	30208000	P36578|RL4_HUMAN
GFGFVTFDDHDPVDK	3	86766000	88494000	98884000	74056000	P22626|ROA2_HUMAN
VEGTEPTTAFNLFVGNLNFNK	2.6	28353000	1235700	8197500	16538000	P19338|NUCL_HUMAN
QSVYEEK	8.8	1431500	1568300	2336000	1590300	Q14152|EIF3A_HUMAN
FEELNADLFR	3.6	21533000	30140000	26850000	19372000	P11142|HSP7C_HUMAN:P54652|HSP72_HUMAN
SMVEEGTGLR	4.4	5440800	4592200	7135200	5475900	Q15149|PLEC_HUMAN
SFEEAFQK	3.5	1759200	1675500	1425600	1321500	P27708|PYR1_HUMAN
VQAQGPGLK	4	3181300	5889200	2893700	2440400	O75369|FLNB_HUMAN
SPNPSTPR	2.9	1641100	3459700	584270	284320	O76021|RL1D1_HUMAN
TPVEPEVAIHR	2.8	37320000	39868000	36538000	31342000	P60866|RS20_HUMAN
GLVGEIIK	3.4	14823000	9291200	24919000	21246000	P22392|NDKB_HUMAN:P15531|NDKA_HUMAN
DKEVSDDEAEEKEDKEEEK	0.5	63228	0	117650	135270	P07900|HS90A_HUMAN
LAPEYEAAATR	10.4	19566000	5656800	2670300	50296000	P30101|PDIA3_HUMAN
EFTESQLQEGK	5.7	2659800	4154900	1929300	3684600	Q01995|TAGL_HUMAN
NGYGFINR	4.2	3594900	3778300	5884200	4054300	P67809|YBOX1_HUMAN:P16989|YBOX3_HUMAN
AELNEFLTR	4.1	26545000	27144000	22244000	23525000	P23396|RS3_HUMAN
ELISNSSDALDK	4.1	32973000	39699000	30955000	55073000	P07900|HS90A_HUMAN
LAQDPYR	9.7	2855300	4433800	3677900	1671200	P18583|SON_HUMAN
NITYEELR	3.5	8777000	6241500	23708000	3042500	Q9NX40|OCAD1_HUMAN
TVLDPVTGDLSDTR	4.4	12552000	3484300	3084000	39027000	Q15393|SF3B3_HUMAN
VVLIGGKPDR	3.4	21740000	29418000	16834000	15299000	P61978|HNRPK_HUMAN
GLALALFGGEPK	3.3	4567300	2609300	2499500	2409500	P49736|MCM2_HUMAN
PVAVALDTK	8.4	28775000	32833000	45184000	34422000	P14618|KPYM_HUMAN
KQLELRQEEER	11.1	6082700	6505600	11743000	1306500	Q15233|NONO_HUMAN
EHYVDLK	5.2	14111000	21383000	15342000	15665000	P15531|NDKA_HUMAN
WTLLQEQK	2.9	12765000	7014500	7349700	7956400	P08729|K2C7_HUMAN
GIPEFWLTVFK	2.2	3245100	27307	837000	1554300	P55209|NP1L1_HUMAN
LPEDPLLSGLLDSPALK	1.1	8987300	952560	9092700	10664000	P49327|FAS_HUMAN
TALIHDGLAR	3.3	20413000	25135000	17079000	17201000	P25398|RS12_HUMAN
AMGIMNSFVNDIFER	3.2	1351000000	7206500	108810000	274560000
LQSIGTENTEENRR	3.4	47146000	24587000	90711000	67716000	P04075|ALDOA_HUMAN
DATPLSR	2.9	5192100	6640300	7955200	5081000	Q12830|BPTF_HUMAN
IMLPWDPTGK	3.4	8444700	3557100	9482800	5646600	P23396|RS3_HUMAN
GYLDDPTVPR	3	12952000	13361000	15644000	20577000	P11413|G6PD_HUMAN
TPEPAPR	19.5	609550	1171900	638110	628190	Q9UHD8|SEPT9_HUMAN
IYIDSNNNPER	2.9	13188000	16413000	12048000	10938000	Q00610|CLH1_HUMAN
AAEDDEDDDVDTKK	3.2	43110000	118740000	32506000	21058000	P06454|PTMA_HUMAN
FYDDAIVSQK	3.3	3044900	3076900	2483100	2280200	O75643|U520_HUMAN
LQIDEQLR	3.5	2625500	1677500	0	1616200	P51114|FXR1_HUMAN:P51116|FXR2_HUMAN:Q06787|FMR1_HUMAN
TNGKEPELLEPIPYEFMA	2.7	14555000	1188000	10430000	7307600	P46778|RL21_HUMAN
KLPEEVVK	9.5	13815000	23022000	14238000	13771000	O75643|U520_HUMAN
QLEDGDQPESK	3.1	1157300	2407200	1153000	714780	Q92945|FUBP2_HUMAN
A(+42.01)AVLQQVLER	3.4	2040000	1701500	1581100	1177200	P12270|TPR_HUMAN
AQQELEEQTR	3.3	6741700	11236000	7747700	7227300	P26038|MOES_HUMAN
WALSQSNPSALR	3.3	5535500	2593100	6090000	3978900	P55072|TERA_HUMAN
TTGIVMDSGDGVTHTVPIYEGYALPH	3.7	422980000	188190000	763670000	718620000	P60709|ACTB_HUMAN:P63261|ACTG_HUMAN
VLDFEHFLPMLQTVAK	2.5	10183000	518700	12392000	15902000	P60660|MYL6_HUMAN
GEGPDVDVNLPK	3	23485000	31260000	30507000	30013000	Q09666|AHNK_HUMAN
IADGYEQAAR	3.8	5186500	7384800	4973600	4356900	P48643|TCPE_HUMAN
DVKFGADAR	3.8	1845600	1813400	2873800	2312900	P10809|CH60_HUMAN
VLIANNGIAAVK	4	689670	690720	1140000	927950	Q13085|ACACA_HUMAN
IEGEMQVPDVDIR	3	4431000	2985500	8035800	4568700	Q09666|AHNK_HUMAN
YDATYETK	4	2069900	5126400	2286600	866570	P23528|COF1_HUMAN:Q9Y281|COF2_HUMAN
ESLSGQAVR	8	6223900	6584000	11542000	5425500	P47985|UCRI_HUMAN
LIPVLVNGMK	3.9	2267800	2345300	2857600	2044800	Q92973|TNPO1_HUMAN
EVFEDAAEIR	3.8	34781000	45604000	35516000	44464000	P19338|NUCL_HUMAN
FGIVTSSAGTGTTEDTEAK	3.4	3393100	5219100	3793900	4559400	P82979|SARNP_HUMAN
GPNKHTLTQIK	6.5	2079800	2854400	2402700	2389400	P40227|TCPZ_HUMAN
TFEESFQK	4.5	6802700	4031600	1999300	1964500	P31327|CPSM_HUMAN
VDNEFDQR	3.3	1163500	1316700	1071000	739240	Q14204|DYHC1_HUMAN
EDLPAENGETK	7.3	3915300	6756300	3572000	3283100	P05114|HMGN1_HUMAN
EAVLLLK	4.3	14418000	15748000	12180000	10768000	P36578|RL4_HUMAN
VFSGLVSTGLK	3.9	23543000	24588000	27755000	22278000	P13639|EF2_HUMAN
FFLEEIQLGEELLAQGEYEK	6.7	446110	0	1545800	0	Q15388|TOM20_HUMAN
YLSEVASGDNK	3.6	14104000	21405000	18152000	14492000	P31946|1433B_HUMAN
TFVNITPAEVGVLVGK	3.4	91534000	40129000	134750000	143420000	P07737|PROF1_HUMAN
SSEQILATLK	3.9	5621700	5318600	5210600	4623000	Q9UMS4|PRP19_HUMAN
GAVDGGLSIPHSTK	3.7	40742000	42542000	37374000	26966000	P46777|RL5_HUMAN
GTPQQIDYAR	8.2	13151000	6853200	39602000	3557300	Q96AE4|FUBP1_HUMAN
EMGTPDVR	3.6	15496000	11163000	10290000	7056200	P62899|RL31_HUMAN
VPVDVAYQR	9	7038100	8523100	9125400	8885000	Q15149|PLEC_HUMAN:P58107|EPIPL_HUMAN
SGVISDTELQQALSNGTWTPFNPVTVR	1.3	4642300	0	948670	3456800	O75340|PDCD6_HUMAN
TTHPLAK	3.4	2175800	2953400	1611700	2690500	Q99497|PARK7_HUMAN
FLNAENAQK	2.5	12591000	13507000	17355000	14675000	P43487|RANG_HUMAN
AYSEAHEISK	3.2	6809500	13315000	7002300	5091500	P61981|1433G_HUMAN
GNFQTIGLSAAAR	11.8	11932000	2091500	10946000	18280000	P05187|PPB1_HUMAN
IPDYLWMGLDGMK	8.1	621730	68847	868190	1007600	P48449|LSS_HUMAN
IVENSDAVTEILNNAELLK	2.9	1404600	269950	1854300	2187800	Q16401|PSMD5_HUMAN
LVQDVANNTNEEAGDGTTTATVLAR	3.4	75435000	45821000	26599000	57217000	P10809|CH60_HUMAN
GLSQSALPYRR	6	13617000	11751000	9223700	11263000	P62277|RS13_HUMAN
YEEHLKR	7.9	6855000	6202500	9701900	10246000	P84090|ERH_HUMAN
GGGVHIEPR	9.2	2221100	1929300	5243400	1367700	O95178|NDUB2_HUMAN
MDAEVPDVNIEGPDAK	4	4742900	4157900	5356200	6385300	Q09666|AHNK_HUMAN
REPSLSPK	11.9	1933900	2425100	269940	4530000	P08174|DAF_HUMAN
S(+42.01)HTILLVQPTK	3.3	36210000	36575000	29537000	23893000	P84090|ERH_HUMAN
VLIAAHGNSLR	3.7	8447000	13304000	7090200	5679100	P18669|PGAM1_HUMAN
SMTEAEQQQLIDDHFLFDKPVSPLLLASGMAR	1.2	9532600	0	6231600	16704000	P12277|KCRB_HUMAN
AVFVDLEPTVIDEIR	3.1	8633600	667460	6861200	9371200	P68366|TBA4A_HUMAN
LLIGDSGVGK	7.4	1641500	1654500	2172000	2271900	Q9H0U4|RAB1B_HUMAN:P62820|RAB1A_HUMAN:P61006|RAB8A_HUMAN:P61026|RAB10_HUMAN:Q92930|RAB8B_HUMAN:P51153|RAB13_HUMAN
FNYSGSGGR	8	3595100	5297800	3015000	2607100	Q12906|ILF3_HUMAN
IQAEFEK	11.2	1981800	2123400	1652700	2726300	Q12874|SF3A3_HUMAN
KEDMTYAVR	9.1	4554900	5281500	5997500	3517400	Q07955|SRSF1_HUMAN
DLHDANTDLIGR	13.8	8233900	11980000	4148500	4217200	P53985|MOT1_HUMAN
EMDQTMAANAQK	2.8	1552700	1800200	2125000	1584400	P30085|KCY_HUMAN
VTGEVLDILTR	5.2	22813000	27611000	28627000	31477000	O75955|FLOT1_HUMAN
YVASYLLAALGGNSSPSAK	3.5	63281000	19045000	21014000	25846000	P05387|RLA2_HUMAN
SQSSDLLER	5.9	11951000	13507000	17355000	14675000	Q8IVT2|MISP_HUMAN
DIDIHEVR	3	28349000	26404000	24476000	22147000	Q00839|HNRPU_HUMAN
SSGPTSLFAVTVAPPGAR	3.3	64805000	48739000	34074000	25999000	Q00839|HNRPU_HUMAN
DTYIENEK	10.2	11046000	3157300	15955000	19718000	P04843|RPN1_HUMAN
NVPVITGSK	3.7	6429600	4802800	5939200	4926300	P35232|PHB_HUMAN
SLYYYIQQDTK	3.3	39715000	62556000	22964000	22246000	P07355|ANXA2_HUMAN
VLPSITTEILK	4.4	12470000	8324200	8728000	7805000	P35232|PHB_HUMAN
FHHTIGGSR	3.5	3286900	8042100	3634600	1417800	P61313|RL15_HUMAN
TAVVVGTITDDVR	2.6	52738000	29242000	29387000	33700000	Q07020|RL18_HUMAN
LGDVYVNDAFGTAHR	3.4	73911000	56184000	104830000	98453000	P00558|PGK1_HUMAN:P07205|PGK2_HUMAN
LEFSIYPAPQVSTAVVEPY	3.5	1520500	72308	1488800	3784600	Q9BQE3|TBA1C_HUMAN:P68366|TBA4A_HUMAN
NFDEILR	4.4	16074000	18833000	21313000	21347000	P30041|PRDX6_HUMAN
AGM(+15.99)THIVR	4.2	777660	813430	1172600	1006100	P39023|RL3_HUMAN
HFELGGDK	3.3	12231000	13105000	10608000	7004800	P83881|RL36A_HUMAN:Q969Q0|RL36L_HUMAN
VNFAMNVGK	3.9	16424000	16066000	23011000	19701000	P14618|KPYM_HUMAN
APGFGDNR	3.2	4825900	7341400	3952500	4159800	P10809|CH60_HUMAN
ITVTSEVPFSK	3.6	34971000	34115000	29466000	24624000	P35268|RL22_HUMAN
VGVNGFGR	3.6	105050000	258600000	25373000	120660000	P04406|G3P_HUMAN
DYSQYYR	3.4	4426100	3323700	4238900	4832200	Q04695|K1C17_HUMAN
DVEDESTGLEK	7.5	5503600	5770500	8290700	6264600	P36952|SPB5_HUMAN
DGYNYTLSK	2.9	28628000	22548000	22885000	19337000	P31949|S10AB_HUMAN
DLYEDELVPLFEK	3.1	9443700	2119100	4506900	5374200	O43390|HNRPR_HUMAN
DYYINIR	8.1	1526600	1649200	1670300	1560300	O43143|DHX15_HUMAN
VASLLVK	4.8	1165800	2346100	1233500	1083500	P00492|HPRT_HUMAN
IVEIPFNSTNK	11.5	13588000	5009400	6543600	17996000	P05023|AT1A1_HUMAN
EKLEATINELV	6.5	20445000	5687000	27248000	39823000	P10599|THIO_HUMAN
LTSSLTTK	8.1	1690100	2923500	1207000	1054100	P22695|QCR2_HUMAN
MFLSFPTTK	1.7	3609000	0	9887600	3733500	P69905|HBA_HUMAN
GADFLVTEVENGGSLGSK	3.6	122590000	118110000	186600000	171770000	P14618|KPYM_HUMAN
RLEEPEEPK	3.3	1976400	4109500	1632900	1206300	O75822|EIF3J_HUMAN
GTIQVITQGTSLK	3	11748000	15524000	15437000	13360000	O43175|SERA_HUMAN
EDPFVFIPEDDPLFPPIEK	2.2	1721900	237760	1535600	3656800	Q08J23|NSUN2_HUMAN
SLDQAINDK	6.2	1313000	1301200	2528400	775590	Q9UQE7|SMC3_HUMAN
DRLEQLER	7.9	4711600	6623600	5953600	5377600	P21127|CD11B_HUMAN
LASDLLEWIR	2.8	6359200	381880	8371400	10794000	O43707|ACTN4_HUMAN:P12814|ACTN1_HUMAN
STLNEIYFGK	3.7	8078000	9685300	9548500	10475000	P47756|CAPZB_HUMAN
HKEVEAAQGVK	11	998030	322430	688330	774350	O60841|IF2P_HUMAN
GFAFVTFDDHDTVDK	3.5	12343000	9101200	13401000	12088000	P51991|ROA3_HUMAN
NIEDVIAQGIGK	3.4	78783000	42047000	35413000	25629000	P05387|RLA2_HUMAN
LESENDEYER	11.9	678740	1237600	488250	324670	O94906|PRP6_HUMAN
DAIAQAVR	3.2	15253000	35684000	6485800	16506000	P29401|TKT_HUMAN
LIEEVMIGEDK	0.3	6003700	0	13407000	10493000	P78371|TCPB_HUMAN
VGEVIVTK	3.3	12720000	16023000	9841000	10289000	P10809|CH60_HUMAN
TPTQLEGATR	8.7	3887100	6771900	5332400	3292500	O94776|MTA2_HUMAN
NVLLDPQLVPGGGASEMAVAHALTEK	3.2	14684000	1338200	11616000	18412000	P49368|TCPG_HUMAN
IYGISFPDPK	3.2	7204300	7906700	9303100	8654200	P26639|SYTC_HUMAN
WVTALEEIPSLIIK	2.8	266930	223580	222600	278230	Q69YN4|VIR_HUMAN
SVC(+57.02)LIGDK	3.7	74212000	95400000	105380000	92920000	O60264|SMCA5_HUMAN
SLSAIYLEK	2.6	4001000	4501100	3972200	3986200	Q15149|PLEC_HUMAN
ILPVGAANFR	7	10714000	13846000	11277000	16670000	P06733|ENOA_HUMAN
DIDEVSSLLR	3.4	5747200	7105000	8366300	6134000	P50990|TCPQ_HUMAN
LLIPVAEGMNEIWLR	1.7	581080	0	729690	1009700	Q96AC1|FERM2_HUMAN
EDGNEEDKENQGDETQGQQPPQR	2.1	10830000	12472000	6309700	4426500	P67809|YBOX1_HUMAN
FSWFAGEK	4.1	836220	873990	1093000	1377800	P21266|GSTM3_HUMAN
DTDSEEEIR	3	10614000	21163000	10569000	10026000	P0DP24|CALM2_HUMAN:P0DP23|CALM1_HUMAN:P0DP25|CALM3_HUMAN
GTVEPQLEAR	3.1	13436000	17658000	18539000	15039000	P21333|FLNA_HUMAN
VIMVGSGGVGK	2.6	3662700	1303000	3300300	4304800	P11233|RALA_HUMAN:P11234|RALB_HUMAN
EASDPQPEEADGGLK	2.8	5016400	8338600	5366200	4532700	P52907|CAZA1_HUMAN
TMLELLNQLDGFEATK	1.5	848220	0	451490	922040	P62195|PRS8_HUMAN
GTQGATAGASSELDASK	2.9	1618700	1578700	925670	910210	O76094|SRP72_HUMAN
EGVHGGLINK	3.1	58549000	78368000	87140000	67586000	P07737|PROF1_HUMAN
ETYPNYLPLYVAR	5	451540	849350	412080	544710	P29144|TPP2_HUMAN
SAYGGPVGAGIR	3.2	16703000	12193000	14520000	11631000	P08729|K2C7_HUMAN
FEIVYNLLSLR	1.7	975140	58964	985730	835380	O75489|NDUS3_HUMAN
EVDDLGPEVGDIK	14.4	6138000	10386000	1709700	6630700	O43143|DHX15_HUMAN
NIIHGSDSVK	3.3	20616000	39854000	18770000	15829000	P22392|NDKB_HUMAN
VELSTGMPR	3.8	4065600	4207200	4848300	4777900	Q16629|SRSF7_HUMAN
IQEVADELQK	3.6	10411000	14244000	12165000	10646000	P18085|ARF4_HUMAN
TGIDLGTTGR	3	4525300	3480800	2072200	4368400	Q14498|RBM39_HUMAN
EGDLIAAQAR	3.1	23278000	20755000	25402000	17500000	P02545|LMNA_HUMAN
YEWDVAEAR	4.4	24822000	34202000	27845000	32281000	P13639|EF2_HUMAN
EGEETLR	1.5	2508500	2030500	4009800	2703700	Q16719|KYNU_HUMAN
THLASDDLYK	18.8	4907900	7997300	4390800	3419900	Q9H7B2|RPF2_HUMAN
IVDQIRPDR	2.5	4420800	5354000	2609000	2528000	P17844|DDX5_HUMAN:Q92841|DDX17_HUMAN
VQALTTDISLIFAALKDSK	9.6	1715900	0	968300	3251800	Q6PKG0|LARP1_HUMAN
AVTEQGAELSNEER	7.2	20219000	27342000	24146000	20470000	P27348|1433T_HUMAN
GELAIKDANAK	14.4	9476900	9255900	4281600	6951500	P05787|K2C8_HUMAN
VWLDPNETNEIANANSR	6.2	41049000	14450000	35622000	24360000	P84098|RL19_HUMAN
QSVLEGLSFSR	5	8376600	7075600	12306000	13087000	Q9NZB2|F120A_HUMAN
SEFEQNLSEK	3	2215900	2861700	2513200	2438700	Q16891|MIC60_HUMAN
AQGPAASAEEPKPVEAPAANSDQTVTVKE	2	70505000	29955000	46098000	38232000	P80723|BASP1_HUMAN
LVNLQHLDLLNNK	5.8	20919000	8268400	32448000	6986900	Q96AG4|LRC59_HUMAN
TTPDVIFVFGFR	2.5	7696400	103480	631950	1140500	P62847|RS24_HUMAN
VSAPGVQGDVK	3.4	3546000	4838600	4273800	3186400	Q09666|AHNK_HUMAN
ALNRPPTYPTK	7.3	4010600	4099100	6022200	3999300	P55010|IF5_HUMAN
VFGQSGAGNNWAK	7.7	25367000	39846000	25609000	32698000	P07437|TBB5_HUMAN:P68371|TBB4B_HUMAN:Q13885|TBB2A_HUMAN
STTSVSEEDVSSR	7.1	389570	674890	325330	279390	Q96IZ0|PAWR_HUMAN
NVGQFSGFPFEK	3.2	7407300	4764300	5899900	6266700	P35659|DEK_HUMAN
IQELEDLLAK	1.7	8983500	7537500	9762400	8027600	P20700|LMNB1_HUMAN
AVDPEDDFQR	2.9	5376200	3070000	2663300	2172800	Q99848|EBP2_HUMAN
DELILEGNDIELVSNSAALIQQATTVK	1.9	1918100	17094	1589900	2017300	P32969|RL9_HUMAN
RFDDAVVQSDMK	3.4	29985000	33070000	24873000	23450000	P11142|HSP7C_HUMAN
DVIEEYFK	4.5	16356000	18656000	17959000	17115000	P25398|RS12_HUMAN
GFAFVTFDDHDSVDK	3.2	44939000	34466000	50712000	44606000	P09651|ROA1_HUMAN:Q32P51|RA1L2_HUMAN
GRSDYDGIGSR	8.9	7510100	2730200	14732000	11057000	O00571|DDX3X_HUMAN
LQLEATER	3.3	3277900	3375800	3018800	2961100	Q15149|PLEC_HUMAN
TQIPTQR	2.2	3739000	4909000	6485800	2702300	P25786|PSA1_HUMAN
FYEQM(+15.99)NGPVAGASR	1	3590300	2634200	5366200	4532700	P29692|EF1D_HUMAN
IMDPNIVGSEHYDVAR	3.2	19902000	10802000	7661500	11455000	P06576|ATPB_HUMAN
LYNNHEIR	3.8	6035200	7211700	3386000	2405400	O60506|HNRPQ_HUMAN
YGLIGLNGIGK	6.8	3014900	4191700	3639400	2633000	Q9UG63|ABCF2_HUMAN
FFDDPMLLELAK	3.1	2459100	83140	1942400	1658800	Q15029|U5S1_HUMAN
STESLQANVQR	6.8	32761000	28765000	17268000	14432000	P26373|RL13_HUMAN
LQAALDDEEAGGRPAMEPGNGSLDLGGDSAGR	3.3	36422000	16112000	26638000	23857000	Q00839|HNRPU_HUMAN
EIFNFVLK	3.9	1872000	902420	1175300	1111700	P78527|PRKDC_HUMAN
DSLYAQGK	5.9	1752600	1857200	3607100	1205700	P83881|RL36A_HUMAN
ENQTAVDVFR	3.2	1899100	2223400	2044800	2056600	Q15382|RHEB_HUMAN
IDSEGGVSANHTSR	3.4	285750	235980	95284	70437	P51659|DHB4_HUMAN
VAVATPAK	3.5	7946200	8711400	6681100	4966900	P19338|NUCL_HUMAN
GSIFVVFDSIESAK	3	1903300	244970	1751100	2531100	P05455|LA_HUMAN
VAVLGASGGIGQPLSLLLK	1.7	12675000	282340	2221600	2948700	P40926|MDHM_HUMAN
DVNQQEFVR	2.8	37273000	25518000	19215000	25049000	P39019|RS19_HUMAN
IVSRPEELREDDVGTGAGLLEIK	2.8	3612100	0	7244000	0	P49368|TCPG_HUMAN
FGVQTDR	6	1642300	3023800	1659500	1756000	Q14247|SRC8_HUMAN
SNDEEAFTFAR	3.7	1072900	1376400	1381000	1534200	P35520|CBS_HUMAN:P0DN79|CBSL_HUMAN
YDPTIEDSYR	3.9	5073500	7509800	4172600	5321300	P61224|RAP1B_HUMAN:P62834|RAP1A_HUMAN:P01111|RASN_HUMAN:P01116|RASK_HUMAN
TKDGLEVAVLPHNIR	7.4	14783000	2022800	43018000	11896000	Q14690|RRP5_HUMAN
GPVKPTGGPGGGGTQTQQQMNQLK	3	2654800	3427500	3093900	2135000	P26196|DDX6_HUMAN
LLEHKEIDGR	4.1	335040	375450	367210	292390	P62333|PRS10_HUMAN
EAIDSYIK	3.8	6226900	7168500	6578000	6344100	Q00610|CLH1_HUMAN
INQMATAPDSQR	2.4	835350	865860	728840	531540	Q9UQE7|SMC3_HUMAN
DGLLPENTFIVGY	2.3	572980	268510	917180	1106200	P11413|G6PD_HUMAN
AAVPSIK	3.4	14032000	15399000	16569000	19311000	P00558|PGK1_HUMAN
VPSFAAGR	17.1	13237000	6550600	25681000	18998000	O00425|IF2B3_HUMAN
TFSFAIPLIEK	3	8372200	3832200	2570300	1960500	Q9NR30|DDX21_HUMAN
AEDKEWMPVTK	3.7	34597000	3860100	23595000	18981000	P15880|RS2_HUMAN
AEDGSVIDYELIDQDAR	2.8	25900000	29647000	11155000	14203000	P07355|ANXA2_HUMAN
NLTEDNSQNQDLIAK	3.5	3665700	5716900	4600400	4345600	Q9UBB4|ATX10_HUMAN
QAVTNPNNTFYATK	2.9	9372600	8858300	4088500	6694700	P38646|GRP75_HUMAN
LVSIDSK	2.6	8965900	11929000	10603000	12090000	P21333|FLNA_HUMAN:O75369|FLNB_HUMAN:Q14315|FLNC_HUMAN
EWGSGSDTLR	2.4	2496500	1417300	1569700	1520000	P16615|AT2A2_HUMAN
MIDMPVER	3.1	4476600	3360400	3244700	3382400	Q15287|RNPS1_HUMAN
SLDEMEK	4.6	2612000	2296500	4198100	2945000	P23246|SFPQ_HUMAN
DFTSEPR	4.6	2612000	2296500	4198100	2945000	P41091|IF2G_HUMAN:Q2VIR3|IF2GL_HUMAN
SQELEVK	10.7	593290	556720	1105900	526670	Q14204|DYHC1_HUMAN
FATHAAALSVR	4.4	53754000	2239700	76844000	101870000	P23246|SFPQ_HUMAN
FDDGAGGDNEVQR	3	2174200	3055100	1836100	1571300	P35998|PRS7_HUMAN
EEGGENLDQAR	6.4	1038300	2658400	697130	632920	P08133|ANXA6_HUMAN
ASIHEAWTDGK	3.4	13612000	20255000	17927000	14336000	O43707|ACTN4_HUMAN:P12814|ACTN1_HUMAN
TVTNAVVTVPAYFNDSQR	2.5	57279000	63890000	53779000	45575000	P11142|HSP7C_HUMAN
MLVELSK	2.6	7987700	18870000	3848100	3546500	P50991|TCPD_HUMAN
LLDHMQNTPGFMYK	4.5	32533000	8342400	60038000	51385000	Q9NVP1|DDX18_HUMAN
YFQINQDEEEEEDED	3.2	15890000	7829600	10330000	9760800	P35268|RL22_HUMAN
GLLQTEPQNNQAK	4	3004200	4936100	3568900	3511600	Q9Y3D6|FIS1_HUMAN
LEAGLNR	8.6	7032300	13748000	9256200	815660	P63218|GBG5_HUMAN
APQVDVDK	8.3	1892700	2342900	2392000	2269200	P41250|GARS_HUMAN
TLLEGEESR	3.4	7530300	9553300	4422800	11532000	P04264|K2C1_HUMAN
EADGSETPEPFAAEAK	2.9	6885500	7997700	7146200	7787100	Q7KZF4|SND1_HUMAN
ILEQEEYQR	6.3	7047200	8235800	10215000	9085000	P35579|MYH9_HUMAN:P35580|MYH10_HUMAN:P35749|MYH11_HUMAN
A(+42.01)MVSEFLK	2.7	5385800	1749000	8120700	4723300	P04083|ANXA1_HUMAN
DFSALESQLQDTQELLQEENR	2.5	5128400	581410	5240300	12661000	P35579|MYH9_HUMAN
GLESTTLADK	6.7	7650500	7737800	17355000	3574000	P21291|CSRP1_HUMAN
VNDTIQIDLETGK	3.4	19191000	1043800	9608100	14391000	P62701|RS4X_HUMAN
APEQEQAAPGPAAGGEAPK	2.7	5219100	6967700	7216000	4983000	P80723|BASP1_HUMAN
DMFEEALR	3.1	2119000	1460700	2578900	2293000	P33991|MCM4_HUMAN
SFVLNLGK	3.6	15467000	13475000	14009000	8934500	P09382|LEG1_HUMAN
SLDMDSIIAEVK	3.9	120750000	18390000	76631000	71480000	P05787|K2C8_HUMAN
EKEELMER	3.4	10557000	16334000	13449000	9886000	P26038|MOES_HUMAN:P35241|RADI_HUMAN
NELESYAYSLK	7.7	18507000	18993000	3650900	6643500	P11021|BIP_HUMAN
AVAFFLESIAMHDIIAAEK	7.3	2191600	254470	931280	744570	P78527|PRKDC_HUMAN
AANWYER	14.9	9627300	3705200	19332000	13908000	O75489|NDUS3_HUMAN
SVDETLR	3.2	56088000	63123000	99840000	47508000	Q06830|PRDX1_HUMAN:Q13162|PRDX4_HUMAN
ELAEQTLNNIK	2.6	3251000	2900600	2914200	2487100	Q92499|DDX1_HUMAN
LVPTGLDFGQEGFTR	3.5	5136700	2022300	1552800	1516200	P46087|NOP2_HUMAN
SAITPGGLR	10	6636400	13411000	6103600	1427000	P34897|GLYM_HUMAN
SMQNHAAVFR	3.7	1211300	387260	1147300	671560	P31040|SDHA_HUMAN
VIAAEGEMNASR	4.7	12070000	17445000	7028700	6842600	P27105|STOM_HUMAN
NLPFDFTWK	4	8852700	577820	3708400	3416500	P52272|HNRPM_HUMAN
YPDPLIK	3.8	26925000	29724000	25157000	26501000	P62701|RS4X_HUMAN
VQDDEVGDGTTSVTVLAAELLR	1.9	5427300	281110	4093600	6215500	P78371|TCPB_HUMAN
LKGDDLQAIK	5	12627000	16318000	11848000	17325000	P07910|HNRPC_HUMAN
EMFEDTVEER	3.5	5513000	4409200	5007300	5185900	Q16576|RBBP7_HUMAN
EGSLPLQYEWQK	6.9	4474600	2191700	6610800	7308900	P78310|CXAR_HUMAN
LNQDQLDAVSK	3.6	8728300	10216000	6887600	6025800	Q14444|CAPR1_HUMAN
AVDDGVNTFK	3.1	6967700	9154200	8236800	7484600	P50990|TCPQ_HUMAN
LTLMEEVLLLGLK	1.8	487090	0	815790	954180	Q9H4A6|GOLP3_HUMAN
TGTAEMSSILEER	3.3	10404000	8085900	7944900	10719000	P25705|ATPA_HUMAN
QLSQSLLPAIVELAEDAK	1.2	2492600	209040	2977000	4400500	P30153|2AAA_HUMAN:P30154|2AAB_HUMAN
VVYIFGPPVK	5.6	2118000	2844000	2006800	1801100	P49915|GUAA_HUMAN
AQYDELARK	4.3	25190000	4339000	45188000	39803000	P05783|K1C18_HUMAN
YAHVVLR	2.1	4262100	3370000	1321000	2087000	P62269|RS18_HUMAN
VNASASSLK	3.1	1323300	1850500	1702800	1087700	Q16658|FSCN1_HUMAN
GAGTDDHTLIR	3.1	7741100	12005000	7507500	6666800	P08758|ANXA5_HUMAN
LAAIVAK	3.1	6218200	6064400	3953000	3414300	P40429|RL13A_HUMAN
ILAVSGGDNK	12.7	2184000	2438000	3388400	2518900	P55735|SEC13_HUMAN
FAGDDAPR	3.1	6374300	13239000	7269200	3900500	P60709|ACTB_HUMAN:P63261|ACTG_HUMAN:P68032|ACTC_HUMAN:Q6S8J3|POTEE_HUMAN
EMTLDEWK	4.1	11612000	5640300	10550000	10819000	Q8NC51|PAIRB_HUMAN
IYDLNKPEAEPK	3.3	6652300	9351100	6494900	6519400	Q9Y3F4|STRAP_HUMAN
EAGAGGLAIAVEGPSK	3.2	16470000	18681000	20768000	23332000	P21333|FLNA_HUMAN
NVFNALIR	6.2	1312200	1340700	1863800	1267300	Q02978|M2OM_HUMAN
DGLSEAAAQSR	3.4	868660	1222300	877050	758330	Q13057|COASY_HUMAN
NALLSLAK	3.4	7971500	2511600	5123100	3638200	P04083|ANXA1_HUMAN
PVAGSELPR	15	2148200	307070	2139900	1378000	P04818|TYSY_HUMAN
IGIVGLPNVGK	4.2	3675300	3571200	4913800	3741700	Q9NTK5|OLA1_HUMAN
ANHPMDAEVTK	6.1	4215800	4638700	7057600	4232300	O95782|AP2A1_HUMAN
ATFNPAQDK	19.9	4848800	6313000	4175300	1357300	O00592|PODXL_HUMAN
YGEQGLR	2.6	1660600	3023800	787500	1756000	O60884|DNJA2_HUMAN
VPVLGSLLNLPGIR	0.9	269760	16409	252780	230900	Q9Y3E0|GOT1B_HUMAN
IEDVGSDEEDDSGKDKK	2.9	3118100	2596800	5228000	2278800	P08238|HS90B_HUMAN
GINGVSPK	3.4	4527100	7634600	5547400	3328800	P18124|RL7_HUMAN
EVEPEPTEDKDLEADEEDTR	2.5	5199900	2146600	8813400	6077200	P20042|IF2B_HUMAN
YAEAVTR	3.5	13363000	22856000	17533000	12071000	P00558|PGK1_HUMAN
QAEVELASR	3	4809500	9196600	4294900	3372900	Q15149|PLEC_HUMAN
TAFDEAIAELDTLNEESYK	7	3939200	345930	4563800	10184000	P31946|1433B_HUMAN
TDTESELDLISR	3.4	6636500	6795300	8355800	9840700	P11586|C1TC_HUMAN
AASQPTSLAPEK	3.1	2540300	2598600	2188900	1978900	Q96N66|MBOA7_HUMAN
VGAGAPVYLAAVLE	4	1113700	709920	2358000	1386800	Q93077|H2A1C_HUMAN:Q8IUE6|H2A2B_HUMAN
EGLELPEDEEEK	3	70652000	144070000	51206000	85606000	P08238|HS90B_HUMAN:P07900|HS90A_HUMAN
TAVAPSAVNLADPR	3.5	2086500	2174000	1784200	1654900	Q9UQ35|SRRM2_HUMAN
LPQTSDDEKKDF	3.4	27104000	55939000	24435000	21334000	Q9GZT3|SLIRP_HUMAN
TLTLVDTGIGMTK	3.5	90730000	61551000	115250000	87660000	P08238|HS90B_HUMAN
MKSDSFAPK	1.1	198980	0	206570	150760	Q9Y2W1|TR150_HUMAN
A(+42.01)AAAAGTATSQR	8.1	1974300	1949600	2957800	2488200	Q9Y2Z0|SGT1_HUMAN
AVSEEQQPALK	3.1	2987500	2598600	2188900	1978900	Q8NE71|ABCF1_HUMAN
VVDPFSK	4	15118000	14572000	10539000	10134000	P61247|RS3A_HUMAN
SYSVGASGSSSR	9	1295900	2354300	1154300	764310	Q8N684|CPSF7_HUMAN
TSPSGKPATLK	7.5	1353300	2321300	1328700	923620	P27695|APEX1_HUMAN
EAPPMEKPEVVK	3	32490000	23388000	21992000	23015000	P62841|RS15_HUMAN
QLAEEDLAQQR	2.9	5126600	6761800	5253400	4978500	Q15149|PLEC_HUMAN
NFSDNQLQEGK	3.3	32839000	47561000	41290000	36453000	P37802|TAGL2_HUMAN
GFAFVYFENVDDAK	1	7457200	19665000	1537100	2605000	P62995|TRA2B_HUMAN
ELEFYLR	4	14561000	7583200	8655700	9997200	P62241|RS8_HUMAN
SYSPYDMLESIR	2.9	35735000	52330000	24054000	26123000	P07355|ANXA2_HUMAN
IVQELPQLLDAR	6	1655800	0	661200	536240	Q6PIU2|NCEH1_HUMAN
DHFEEAMR	3.5	4990600	6087000	5759900	4603700	P55072|TERA_HUMAN
SLFLGQK	3.8	4408900	5072700	4416300	4224300	O75367|H2AY_HUMAN
ENPVYEK	8.7	7824900	17703000	8882200	2964800	P46777|RL5_HUMAN
ILQEDPTNTAAR	3.3	1300700	1905400	684600	1247900	Q15006|EMC2_HUMAN
S(+42.01)TGGDFGNPLRK	9.9	6949400	1144900	11829000	13600000	P20340|RAB6A_HUMAN
YDEMVESMK	4	22406000	22674000	33539000	33412000	P62258|1433E_HUMAN
VGYTPDWIFLLR	2.2	1335500	53414	898020	2179400	Q00610|CLH1_HUMAN
KLELSDNR	8.7	3436400	5884400	3458100	3133400	P39687|AN32A_HUMAN
FSMPGFK	3.8	12582000	21752000	11476000	10173000	Q09666|AHNK_HUMAN
NSNLVGAAHEELQQSR	3.2	49133000	53937000	56318000	38634000	P02545|LMNA_HUMAN
ESWEMNSEEK	3.4	1784600	1701100	3117800	2319700	Q02790|FKBP4_HUMAN
DGQAMLWDLNEGK	3.4	26737000	7037300	31288000	28896000	P63244|RACK1_HUMAN
VREEEIEVDSR	3.2	6917300	7456700	3522900	4066100	Q14978|NOLC1_HUMAN
LLNDEDPVVVTK	3.4	1869900	1285900	1773400	2220300	P14923|PLAK_HUMAN
AGNLGGGVVTIER	3	53902000	43072000	30307000	30666000	P35268|RL22_HUMAN
FHVEEEGK	3.9	22119000	36489000	29393000	22446000	P00558|PGK1_HUMAN:P07205|PGK2_HUMAN
VSPVSYLR	4.2	7557700	11104000	5095300	6412300	Q8TEM1|PO210_HUMAN
EITALAPSTM(+15.99)K	3.6	56159000	180500000	20957000	14383000	P60709|ACTB_HUMAN:P63261|ACTG_HUMAN:P68032|ACTC_HUMAN
INYTEGR	6.8	7247800	15889000	5861000	6018700	P06744|G6PI_HUMAN
EQSILELGSLLAK	2.7	1993200	2016800	2561400	1737200	O00231|PSD11_HUMAN
TFTEMDSHEEK	12.1	783000	576120	639310	1673700	P48444|COPD_HUMAN
QEEEMMAK	4.4	3188000	5004300	4748200	2999700	P35579|MYH9_HUMAN
TIGGGDDSFNTFFSETGAGK	3.1	184200000	108320000	148740000	120950000	Q9BQE3|TBA1C_HUMAN
VAGGAAPSKPASAK	3.6	2414900	4620100	2515200	1747800	Q14978|NOLC1_HUMAN
EKSVTGWK	1.8	2832600	3435300	2850100	2768600	P31327|CPSM_HUMAN
ISFPAIQAAPSFSNSFPQIFR	2.2	1591800	62385	895190	2386200	P23381|SYWC_HUMAN
VLDSGAPIKIPVGPETLGR	5.2	21559000	17621000	2842600	9415100	P06576|ATPB_HUMAN
ASGNYATVISHNPETK	3.2	47633000	52370000	39517000	30744000	P62917|RL8_HUMAN
DNGIRPSSLEQMAK	0.9	3061800	3401900	3041300	4480100	P55084|ECHB_HUMAN
VGAEDADGIDMAYR	3.8	3088400	2205000	4028900	4125400	P49588|SYAC_HUMAN
ILNEMRDQYEK	6.2	9457900	5590600	11458000	9300100	Q04695|K1C17_HUMAN:P02533|K1C14_HUMAN
IALTDNALIAR	3.1	43250000	23225000	17501000	13158000	P18124|RL7_HUMAN
GLVEPVDVVDNADGTQTVNYVPSR	3.6	27325000	36652000	32576000	31192000	P21333|FLNA_HUMAN
SINPDEAVAYGAAVQAAILSGDK	2.8	13772000	3231100	18498000	23533000	P11142|HSP7C_HUMAN
HGVIVAADSR	3.7	1147300	2680500	646440	383350	P28074|PSB5_HUMAN
EDSVKPGAHLTVK	3.4	23724000	30592000	18894000	12887000	P51991|ROA3_HUMAN
ILDLISESPIK	4.7	3313400	4619700	5653600	2980200	P61978|HNRPK_HUMAN
YGINTTDIFQTVDLWEGK	10	4631000	138170	1418000	6723400	P37802|TAGL2_HUMAN
ELLFLSNANPSLLER	2.5	4373300	304150	4568200	7056400	P51398|RT29_HUMAN
LYDAYELK	3.7	9202400	13800000	6747300	8338400	P08758|ANXA5_HUMAN
NANAEPAVQR	5.1	3220800	2857300	7952600	1148600	P14209|CD99_HUMAN
LTPTHGEMR	10.8	341110	166290	399520	390600	Q8NE71|ABCF1_HUMAN
LLVVDPETDEQLQK	3.3	5593900	4433400	4983800	5004300	O14745|NHRF1_HUMAN
VRGEVAPDAK	3.9	7201400	17574000	6057600	3716100	P09382|LEG1_HUMAN
DVDFELIK	3.7	3676200	4274500	5357700	5072500	P48643|TCPE_HUMAN
LGQGVLVQVSPSLVK	1.3	722790	0	929850	821890	Q13868|EXOS2_HUMAN
MQTNQTPPTYNK	8.1	3846400	274350	7401900	7098000	Q93050|VPP1_HUMAN
GNPTVEVDLFTSK	2.4	96912000	58172000	127490000	159610000	P06733|ENOA_HUMAN
NAVTQFVSSMSASADVLALAK	2.3	2508800	72308	2170600	4423000	P47985|UCRI_HUMAN
LQTSSVLVSGLR	2.8	5591800	6148700	7140000	5958500	P22314|UBA1_HUMAN
YNGLIHR	2.9	4662700	3544800	3473800	1826100	P46779|RL28_HUMAN
TLAESALQLLYTAK	3.6	2664500	2084400	3619200	3658800	Q9Y490|TLN1_HUMAN
VVLIGDSGVGK	3.2	7350700	7137400	7194700	7059100	Q15907|RB11B_HUMAN
NGFVVLK	3.4	24594000	27106000	34752000	25122000	P63241|IF5A1_HUMAN
WVDGGLTNALPILPVGR	1.3	3855400	799360	5941500	8440200	P41247|PLPL4_HUMAN
LSDGVAVLK	3.4	28065000	25982000	10457000	21973000	P10809|CH60_HUMAN
LLAEPVPGIK	3.7	6826900	8873500	7378200	7967500	P61088|UBE2N_HUMAN
VKETADFK	7.2	920530	448150	729910	1147100	P21333|FLNA_HUMAN
LITPAVVSER	4.3	46240000	35116000	27784000	27140000	P62851|RS25_HUMAN
YEDQELTGK	11	5659500	8465900	3066700	9751500	Q9UIG0|BAZ1B_HUMAN
AELNPWPEYIYTR	4.7	8180300	4918000	11305000	12138000	P26639|SYTC_HUMAN
LDLTENLTGSK	7.5	6371700	1667100	18518000	1202000	P46013|KI67_HUMAN
IIGGDPK	3.6	2102900	3704700	2536800	1959600	O75083|WDR1_HUMAN
GVPAGNSDTEGGQPGR	3	1412000	1919200	626160	378100	Q9UKV3|ACINU_HUMAN
A(+42.01)EEGIAAGGVMDVNTALQEVLK	8	4896300	0	2490800	4144700	P25398|RS12_HUMAN
IALGIPLPEIK	2.8	8349500	2317000	2033400	2264400	P31327|CPSM_HUMAN
IGEGTYGVVYK	2.8	5499600	6823700	5146700	5579000	P06493|CDK1_HUMAN:P24941|CDK2_HUMAN
LGDDEVR	13	2228000	4405000	2431100	1611200	Q14444|CAPR1_HUMAN
AGQSAAGAAPGGGVDTR	2.8	3834300	7414200	3999400	2885800	P21333|FLNA_HUMAN
FSFGLLDLPFR	7.4	262640	24744	0	430920	A6NHR9|SMHD1_HUMAN
LGELTGTVK	3.7	4550700	6933800	5906100	4430800	O43615|TIM44_HUMAN
GGYGGGGPGYGNQGGGYGGGYDNYGGGNYGSGNYNDFGNYNQQPSNYGPMK	0.9	7236200	0	8796100	5359500	P22626|ROA2_HUMAN
IMYDLTSKPPGTTEWE	2.3	1295800	393980	1170700	1654300	P49915|GUAA_HUMAN
ATENDIYNFFSPLNPVR	2.7	26617000	2828700	12215000	17407000	P31943|HNRH1_HUMAN:P52597|HNRPF_HUMAN
EAFSLFDKDGDGTITTK	3	38615000	12182000	51588000	45454000	P0DP24|CALM2_HUMAN:P0DP23|CALM1_HUMAN:P0DP25|CALM3_HUMAN
VDIAEGR	2	3334400	5490400	3916800	2838800	Q15056|IF4H_HUMAN
NYEEIAKVEK	6.3	4776600	3415400	5189900	7405800	P49755|TMEDA_HUMAN
QSFTMVADTPENLR	2.9	4457400	3342900	5042300	4065100	Q14847|LASP1_HUMAN
VEIIANDQGNR	6.4	81187000	110900000	64069000	56925000	P11142|HSP7C_HUMAN:P11021|BIP_HUMAN:P0DMV8|HS71A_HUMAN:P0DMV9|HS71B_HUMAN:P54652|HSP72_HUMAN
TDSDIIAK	12.8	3182400	2885000	3677900	2032500	P09012|SNRPA_HUMAN
VHPAVVIR	3.8	4536400	2924300	3781800	2310300	P62829|RL23_HUMAN
IPNFDVR	6.5	10087000	1585400	17013000	15825000	P11388|TOP2A_HUMAN
LVMEDGK	9.6	708060	925630	838590	587100	P47897|SYQ_HUMAN
VAEELALEQAK	3.1	3263000	3145800	4108300	3293400	Q9NX63|MIC19_HUMAN
DDVAPESGDTTVK	6.4	3109100	5217900	3080600	2927400	O76021|RL1D1_HUMAN
HNWGQGFR	6.5	6976700	11235000	6777200	6959500	Q9BUN8|DERL1_HUMAN
IWDLEGK	3.5	17059000	10335000	17013000	15825000	P63244|RACK1_HUMAN
VDIDVPDVNIEGPEGK	3.1	13766000	11794000	14734000	20588000	Q09666|AHNK_HUMAN
ASGDFQTTK	6.6	858900	527880	1109600	823130	P06756|ITAV_HUMAN
VTDYAEEK	6.6	858900	527880	1109600	823130	Q9NX55|HYPK_HUMAN
VAFITGGGTGLGK	3.2	1969900	1845600	1756200	1918600	Q16698|DECR_HUMAN
DLPEHAVLK	3.6	34889000	36676000	24200000	23415000	Q00839|HNRPU_HUMAN
AAYEAELGDARK	6.8	21049000	26112000	19576000	20886000	P02545|LMNA_HUMAN
AQQELEEQTRR	5	1397800	1175900	528700	87280	P26038|MOES_HUMAN
M(+42.01)NPSTPSYPTASLYVGDLHPDVTEAMLYEK	2.2	5478500	0	303980	2004000	Q9H361|PABP3_HUMAN
QLLAGGIAGAVSR	10.6	21126000	3553000	73384000	718370	Q6NUK1|SCMC1_HUMAN
KTEAPAAPAAQETK	3.5	36809000	44258000	27973000	19635000	P80723|BASP1_HUMAN
ESPLLFK	3.3	7420500	7262100	10920000	8449800	P26038|MOES_HUMAN
GIVVYTGDR	14.8	12791000	1391100	23011000	19701000	P05023|AT1A1_HUMAN
DLQNVNITLR	3.3	9215300	5275300	5694100	4648400	P35232|PHB_HUMAN
DSIVQGFQWGTR	7.9	5067100	11087000	1765100	1581200	Q15029|U5S1_HUMAN
ELTDEEAER	3	3615700	7192100	3964000	3085500	Q9Y266|NUDC_HUMAN
TKFETEQALR	3.3	16590000	7080200	11220000	12819000	Q04695|K1C17_HUMAN:P08727|K1C19_HUMAN
LQSIGTENTEENR	3.8	19709000	24940000	23056000	29669000	P04075|ALDOA_HUMAN
DSLSVNEFK	4.2	3151600	4389700	2729900	3353900	Q99584|S10AD_HUMAN
EDQVEQYKK	3.2	394380	506130	612140	459240	P02545|LMNA_HUMAN
ASNGDAWVEAHGK	2.7	5662200	5732900	2226700	2749700	P38646|GRP75_HUMAN
SPYDMLESIR	3.9	1535100	2288400	2992500	859480	P07355|ANXA2_HUMAN
FSM(+15.99)PGFK	10	10193000	3650200	5560800	5581700	Q09666|AHNK_HUMAN
VQVEYKGETK	7.2	9907500	4311000	1690300	4608400	P11142|HSP7C_HUMAN:P54652|HSP72_HUMAN
TLDNDIMLIK	11.2	160840000	127540000	288840000	207320000	P35030|TRY3_HUMAN
YLVIQGDER	15.4	7684200	4484200	14197000	10148000	P00533|EGFR_HUMAN
D(+42.01)DDIAALVVDNGSGM	3.1	784700	25521	1643200	1470100	P60709|ACTB_HUMAN
SIQEIQELDKDDESLR	3.9	11118000	8068600	19938000	16467000	P52565|GDIR1_HUMAN
YHPGYFGK	4.2	8040600	3267000	2530900	1659100	P46776|RL27A_HUMAN
GPPASSPAPAPK	7.6	1352200	2342300	1361800	1062000	Q15942|ZYX_HUMAN
VLEEANQAINPK	2.7	8348900	7081700	5347000	4631700	Q92841|DDX17_HUMAN
NSTFSEIFK	3.7	13162000	21958000	12318000	17672000	P29401|TKT_HUMAN
GLTPSQIGVILR	3.2	17201000	14166000	22735000	14564000	P62277|RS13_HUMAN
VGKGEPGAAPLSAPAFSLVFPFLK	12.7	1082500	0	247810	1148100	Q92616|GCN1_HUMAN
SQGGEPTYNVAVGR	6.7	5645100	9004100	5530700	5174200	P35080|PROF2_HUMAN
LGEIVTTIPTIGFNVETVEYK	3	3958000	154020	2891600	6207200	P61204|ARF3_HUMAN:P84077|ARF1_HUMAN:P18085|ARF4_HUMAN:P84085|ARF5_HUMAN
AADESTGSIAK	8.5	1281700	1397300	2335600	1106500	P04075|ALDOA_HUMAN
IMNVIGEPIDER	3.4	9739700	10386000	6854800	10752000	P06576|ATPB_HUMAN
DDLYAEQMER	4.7	1641500	2182300	2550300	1833300	Q9Y5B9|SP16H_HUMAN
TLATDILMGVLK	1.6	2298200	62320	1985000	2076300	O43143|DHX15_HUMAN
AYGELPEHAK	3.5	8536000	9814100	6141600	5036500	O14602|IF1AY_HUMAN:P47813|IF1AX_HUMAN
TSIDAYDNFDNISLAQR	2.6	9682500	5752700	10418000	10734000	Q00610|CLH1_HUMAN
VLSIGDGIAR	5.5	29738000	8435500	81358000	9845000	P25705|ATPA_HUMAN
VTYHPDGPEGQAYDVDFTPPFR	3.6	4946000	5329000	4577300	5020700	Q15046|SYK_HUMAN
M(+42.01)ESYHKPDQQK	3.3	21888000	38729000	14113000	22258000	P29401|TKT_HUMAN
YNYHLDSSGSYVFENTVATVMALR	1.6	426160	0	148590	95637	P49588|SYAC_HUMAN
IQASTMAFK	3.8	9499100	13149000	10325000	10517000	P37802|TAGL2_HUMAN
LLVTDMSDAEQYR	2.9	4427200	3919400	5607300	4461900	O14929|HAT1_HUMAN
AMAAEAEASR	20.2	5235700	10997000	1363900	1435200	P27105|STOM_HUMAN
ERGPYVYR	3.6	5153800	10733000	6245300	2471800	Q8WTV0|SCRB1_HUMAN
DEAEDLLGR	4	1286300	3158200	572780	1414400	Q9Y5B9|SP16H_HUMAN
VSISEGDDKIEYR	9.8	6814900	20154000	1261900	1159400	P22087|FBRL_HUMAN
ALQASALK	3.3	6976700	8284900	7178300	6436500	P04075|ALDOA_HUMAN
ASGFEESMK	6.5	1073900	998820	865820	1059900	Q6P2Q9|PRP8_HUMAN
EGGDGEEQDVGDAGR	3.6	516160	796810	407300	217790	Q8N1G4|LRC47_HUMAN
LQQTEAELR	13.3	2819600	3023400	5674200	1995600	P26640|SYVC_HUMAN
SESPKEPEQLR	3.3	31906000	49519000	24730000	18760000	P09651|ROA1_HUMAN
ELSGTIK	3.4	5614900	9045500	6244800	4721800	P30050|RL12_HUMAN
QVAQQEAER	13.1	2042700	1739400	1878600	1016400	P35232|PHB_HUMAN
MAIQTQQSK	5.3	10426000	7737800	17355000	14675000	O96008|TOM40_HUMAN
VLDPFTIKPLDR	3.8	45064000	97483000	19168000	45023000	P29401|TKT_HUMAN
QQEIVVSR	10.4	4879300	8975600	7447800	1684800	Q15393|SF3B3_HUMAN
LDQLIYIPLPDEK	3.9	14260000	16601000	16694000	15565000	P55072|TERA_HUMAN
HDWIINR	4.1	1855400	574080	556460	386830	P53701|CCHL_HUMAN
QRIDEFEAL	3.5	3460600	3439400	4848100	3818000	P15311|EZRI_HUMAN
AVNTLNEALEFAK	3.2	14220000	3576600	4226000	3521900	P31327|CPSM_HUMAN
GHLENNPALEK	6.4	30310000	27707000	22284000	17382000	P05388|RLA0_HUMAN
TTPSYVAFTDTER	3.7	94616000	115060000	75039000	73881000	P11142|HSP7C_HUMAN:P0DMV8|HS71A_HUMAN:P0DMV9|HS71B_HUMAN:P54652|HSP72_HUMAN
DGDGTITTK	8.3	2868500	4356000	3558300	2997500	P0DP24|CALM2_HUMAN:P0DP23|CALM1_HUMAN:P0DP25|CALM3_HUMAN
LTPTHYLTK	9.3	6104100	10034000	4870100	3794700	P04844|RPN2_HUMAN
NPEPELLVR	4	2224600	1981400	2329200	2690200	Q14697|GANAB_HUMAN
GTVTDFPGFDER	3.2	16055000	22508000	15192000	18861000	P08758|ANXA5_HUMAN
VLLGETGK	4.4	14997000	16462000	12747000	10720000	P62280|RS11_HUMAN
GYFEYIEENK	3	17550000	18218000	21937000	17867000	Q00839|HNRPU_HUMAN
SQESGYYDR	2.9	1916000	4377100	1461600	1171300	P43243|MATR3_HUMAN
QGYVLSSIEGR	10.2	16284000	7538000	52171000	2797400	O43684|BUB3_HUMAN
QITVNDLPVGR	6.3	203390000	303900000	230670000	236130000	Q06830|PRDX1_HUMAN:P32119|PRDX2_HUMAN
DRDYSDHPSGGSYR	3.2	7931100	6923300	1686800	1119800	P38159|RBMX_HUMAN
ADDGRPFPQVIK	3	113880000	125400000	147510000	164140000	P04075|ALDOA_HUMAN
ESEITDEDIDGILER	2.9	2242300	1057800	1171800	1203100	O60264|SMCA5_HUMAN
GPTEADELMK	3.8	9261700	9336700	14735000	12148000	P11413|G6PD_HUMAN
ALGTEVIQLFPEK	3.1	3550300	1561000	1774000	1739300	O95831|AIFM1_HUMAN
ILGPQGNTIK	3.8	5239700	6898800	4128800	3578800	Q07666|KHDR1_HUMAN
DEPSVAAMVYPF	1	924720	40650	2053500	1604800	P53396|ACLY_HUMAN
SDQNLQTALELTR	6.3	3644300	2904100	3655900	3404300	O95373|IPO7_HUMAN
AASITSEVFNK	3.8	5210300	3917200	3575900	4704400	Q9Y5B9|SP16H_HUMAN
LQEVIETLLSLEK	6.4	943280	58639	1193400	1863300	O00232|PSD12_HUMAN
LAADFSVPLIIDIK	6.4	943280	58639	1193400	1863300	P27708|PYR1_HUMAN
ISPDQLADLYK	8.7	8040400	10393000	9231600	10105000	P06733|ENOA_HUMAN
GVGAAATAVTQALNELLQHVK	1.7	1234500	0	611490	2111400	Q9Y490|TLN1_HUMAN
VLFFDELDSIAK	2.4	1123600	703040	1661200	1574400	P55072|TERA_HUMAN
HSQFIGYPITLFVEK	3.5	19958000	9821800	14704000	16133000	P07900|HS90A_HUMAN
AGQEIPEEGR	11.2	494950	851020	523160	476530	Q9Y2W2|WBP11_HUMAN
FQDGDLTLYQSNTILR	4.6	17312000	11965000	27515000	28643000	P09211|GSTP1_HUMAN
SNEILTAIIQGMR	3.3	3754100	637500	5432800	5757100	Q14974|IMB1_HUMAN
EIEELKQELIQAEIQNGVK	1.6	1144600	0	2306300	2271900	Q12904|AIMP1_HUMAN
HSGPNSADSANDGFVR	3.2	9665900	11690000	7381300	6267100	P52597|HNRPF_HUMAN
GITGVEDK	12.1	13560000	27656000	11651000	14519000	P29401|TKT_HUMAN
ARSDEGQLSPATR	4.9	753400	1175900	528700	87280	Q15149|PLEC_HUMAN
ASYVAPLTAQPATYR	2.9	4457600	2114700	1901200	2151400	Q96PK6|RBM14_HUMAN
YSFTTTAER	7.4	13647000	20485000	19441000	13573000	P60709|ACTB_HUMAN:P63261|ACTG_HUMAN
GLVLDHGAR	6.6	3779700	5508900	3249700	3434500	P40227|TCPZ_HUMAN
INVYYNEATGGK	3.4	63762000	63230000	53647000	41433000	P68371|TBB4B_HUMAN
TLEGELHDLR	3.3	26517000	28891000	33556000	26732000	P02545|LMNA_HUMAN
VKDAVEQQGEVKK	7.9	6021600	10742000	10421000	1677000	Q9NX58|LYAR_HUMAN
ALAQEDQGAGEVER	3.5	212490	379560	241030	229390	O15020|SPTN2_HUMAN
SEEKISDSEGFK	10.5	5039800	5929800	4009100	2679500	P23246|SFPQ_HUMAN
LNTLLQR	3.9	12099000	7139800	2903800	3133300	Q00839|HNRPU_HUMAN
QRELEQLGR	8.6	3108900	3845700	5236400	2030000	Q15149|PLEC_HUMAN
KLLADQAEAR	6.8	1805800	2962700	2075000	1619600	P84098|RL19_HUMAN
YATALYSAASK	7.5	4205300	3827000	2703300	2912500	P48047|ATPO_HUMAN
VLLESEQFLTELTR	2.8	9705400	1177300	3354800	5535100	P37108|SRP14_HUMAN
GIIRPGTAFELLEAQAATGYVIDPIK	2	3160800	0	403770	2572300	Q15149|PLEC_HUMAN
QEKPAEKPAETPVATSPTATDSTSGDSSR	3	5588300	10414000	6090900	4215700	P54727|RD23B_HUMAN
IIQLLDDYPK	1.6	38283000	16809000	27021000	18581000	P05388|RLA0_HUMAN
VSGSELVQK	8.7	2905800	3033000	5584100	2172500	P62195|PRS8_HUMAN
YAALYQPLFDK	2.7	1340400	1548000	1552100	1459200	Q99733|NP1L4_HUMAN
AIEMLGGELGSK	4.4	4038200	1962900	3277600	4200100	P07954|FUMH_HUMAN
FNPFVTSDR	4.7	32024000	29924000	4919800	2414600	P61254|RL26_HUMAN:Q9UNX3|RL26L_HUMAN
AEAGAGSATEFQFR	3.6	15295000	13320000	11115000	12417000	P46783|RS10_HUMAN
IANPVEGSSGR	3.3	10693000	13696000	10706000	7946100	Q15365|PCBP1_HUMAN
NYILDQTNVYGSAQR	3	2873800	2655900	2203700	2390000	Q9BUJ2|HNRL1_HUMAN
INEILSNALK	3.8	9281900	6917200	6697500	6242600	P52272|HNRPM_HUMAN
IFAQDGEGQR	3	3305900	2153400	5465800	3850700	O75369|FLNB_HUMAN
QREEEIEAQEK	3.1	1639800	2991200	1617600	1008300	O75937|DNJC8_HUMAN
TKDGVVEITGK	3.5	9462300	13636000	8394400	7318500	P04792|HSPB1_HUMAN
IAEALSK	3.2	4383700	12950000	1706800	1293200	P33992|MCM5_HUMAN
GNLGAGNGNLQGPR	2.7	2916900	3121500	1939600	1816500	P43243|MATR3_HUMAN
LTPEEEEILNK	7.9	65253000	45980000	39721000	36806000	P62241|RS8_HUMAN
VINAAHSFYNGTTTLPISDEDR	4	2097100	3168000	3286600	1933900	P49915|GUAA_HUMAN
VVGVVAGGGR	12	2632300	2577200	4230900	2699400	P62917|RL8_HUMAN
NNFEGEVTK	2.8	2591200	3253100	2990500	2801600	P07237|PDIA1_HUMAN
ATDVMIAGK	4.3	3423300	3732400	4910700	4354600	P23526|SAHH_HUMAN
ASITPGTILIILTGR	2	6013100	0	4988600	5588100	Q02878|RL6_HUMAN
LSVDYGKK	10.6	19095000	4094600	3658800	3008600	Q9BQE3|TBA1C_HUMAN:P68366|TBA4A_HUMAN
FGSGMNMGR	2.7	5195800	2817800	3050200	2656400	P52272|HNRPM_HUMAN
TVSLLDENNVSSYLSK	3.7	4927600	5135100	4365300	3880800	P78527|PRKDC_HUMAN
VSELKEELK	10	4222900	1020200	4037300	3885000	Q00839|HNRPU_HUMAN
NIVLSGGSTMFR	4.1	3278000	2713700	3631000	3499200	P61158|ARP3_HUMAN
AQDPSEVLTMLTNETGFEISSSDATVK	1.3	6718900	0	0	1575900	Q12905|ILF2_HUMAN
VNPTVFFDIAVDGEPLGR	1.2	22967000	98484	6547000	17283000	P62937|PPIA_HUMAN
DNTIEHLLPLFLAQ	10.6	203440	0	71426	169370	P30153|2AAA_HUMAN
WGFGLEELYGLALR	10.6	203440	0	71426	169370	Q9H3P7|GCP60_HUMAN
S(+42.01)GSMATAEASGSDGK	3.6	1835700	2877400	1671800	1508100	O43169|CYB5B_HUMAN
VTPVEVMPVFPDFK	13.5	3027700	471860	3958900	5413900	Q8N7H5|PAF1_HUMAN
A(+42.01)EQVALSR	4.6	6958800	8858500	6496400	11957000	P11413|G6PD_HUMAN
HSGNITFDEIVNIAR	2.6	43307000	1134100	11150000	13377000	P30050|RL12_HUMAN
GEGQLGPAER	3.4	23372000	41862000	22544000	17401000	P13639|EF2_HUMAN
AGQLTSEEDTLSLVTADHSHVFSFGGYPLR	9.5	15996000	0	5153800	8043500	P05187|PPB1_HUMAN
LTSLNVK	4.3	4443400	5132800	3258700	3041600	P26599|PTBP1_HUMAN:O95758|PTBP3_HUMAN
FDDAVVQSDMK	3.8	11553000	14749000	13596000	12291000	P11142|HSP7C_HUMAN
MDSTEPPYSQK	3.6	4119600	10597000	2182600	1664200	P68104|EF1A1_HUMAN
GEDLTEEEDGGIIR	8.5	6169600	8385000	5584600	7850000	Q02790|FKBP4_HUMAN
AELDDTPMR	6.5	6346600	8990700	8599400	7012000	P23246|SFPQ_HUMAN
SPQNQYPAELMR	10.5	12281000	27031000	8085600	9012900	P33993|MCM7_HUMAN
VAAPQDGSPR	5	2483600	766820	287110	218980	Q9HD15|SRA1_HUMAN
FETLQAQAGK	3.5	27409000	31826000	26428000	21769000	P08729|K2C7_HUMAN
MKDTDSEEEIR	3.2	10180000	19944000	10570000	6494400	P0DP24|CALM2_HUMAN:P0DP23|CALM1_HUMAN:P0DP25|CALM3_HUMAN
TFIAIKPDGVQR	3.9	80344000	135680000	74603000	80121000	P22392|NDKB_HUMAN:P15531|NDKA_HUMAN
LPNFGFVVFDDSEPVQK	2.7	7487700	2184900	3344500	4551900	Q13283|G3BP1_HUMAN
FDVSSTSVFK	3.6	2709600	2788600	3324400	3414300	Q96TA1|NIBA2_HUMAN
GDYPQAMK	7	2598200	3705200	2932800	2191000	P31948|STIP1_HUMAN
KGLDPYNVLAPK	3.8	36577000	34995000	45582000	45272000	P10606|COX5B_HUMAN
SQYEVMAEQNR	3.5	5384700	5950400	5673800	4797200	P08727|K1C19_HUMAN
VDVGKDQEFTVK	3.2	15516000	19572000	18624000	20031000	P21333|FLNA_HUMAN
AQHEDQVEQYK	2.6	4562900	8667300	4951600	3681500	P02545|LMNA_HUMAN
M(+42.01)MLGTEGGEGFVVK	3.3	8751500	1075700	5169100	5693600	P31943|HNRH1_HUMAN
EGAAAAPPPER	2.8	1633300	4003000	189480	1337200	Q7Z2K6|ERMP1_HUMAN
QFAEMYVAK	2.9	14256000	12960000	19494000	18507000	P13639|EF2_HUMAN
YQLSIHK	10.3	38861000	7023700	131310000	9849000	P05023|AT1A1_HUMAN
IIEPSLR	3.2	18020000	13683000	10628000	11564000	P62987|RL40_HUMAN
SIAANMTFAEIVTPFNIDR	3.8	1928100	72308	2170600	4423000	P24928|RPB1_HUMAN
VLIGENEKAER	5.5	7530600	6917200	10922000	9726000	P55265|DSRAD_HUMAN
GESFYQDR	3.2	1151300	1605500	1316700	1077100	P54136|SYRC_HUMAN
VVVQVLAEEPEAVLK	2.2	8737000	2561700	7848300	12109000	P49327|FAS_HUMAN
TGPTVTQVK	13.4	1667900	3230100	934160	1587700	Q13428|TCOF_HUMAN
WFWLLPVK	7.6	312030	93994	258770	109670	Q9H583|HEAT1_HUMAN
AAAAEVLGLILR	3.7	193810	100070	303740	371440	P78527|PRKDC_HUMAN
TALLDAAGVASLLTTAEVVVTEIPKEEK	0.9	3031700	0	10719000	1408100	P10809|CH60_HUMAN
ISSSSFSR	5	33684000	17416000	7822500	16448000	P05787|K2C8_HUMAN
SAAQAAAQTNSNAAGK	5.4	10841000	19695000	6570800	7190700	Q8NC51|PAIRB_HUMAN
AEGSSTASSGSQLAEGK	1.4	759120	1125500	431270	335670	Q9NZB2|F120A_HUMAN
FEKEAAEMGK	5.2	1675000	559440	1383500	1409200	P68104|EF1A1_HUMAN:Q05639|EF1A2_HUMAN
TNEGVIEFR	3.7	7924600	6913800	4461300	4762600	Q13247|SRSF6_HUMAN
QAEIEGLKGQR	8.7	1236700	199740	1235900	1740400	P05787|K2C8_HUMAN
STGEAFVQFASK	3.5	8948300	5254300	4827200	4454300	P31942|HNRH3_HUMAN
LLIVSTTPYSEKDTK	9.8	53627000	48013000	78193000	87259000	Q9Y230|RUVB2_HUMAN
YGNQLVR	3.1	1843400	2418100	1788400	1260700	P33993|MCM7_HUMAN
YQEVTNNLEFAK	3.1	10782000	11713000	7534700	7417300	Q14444|CAPR1_HUMAN
EELMESR	3.7	2726800	3555400	3189800	2394300	P20700|LMNB1_HUMAN
MQHLIAR	3.5	6195600	9302000	6280500	6675100	P14618|KPYM_HUMAN
IGNSTAIQELFK	3.9	10305000	10051000	17659000	11853000	P07437|TBB5_HUMAN:P68371|TBB4B_HUMAN:Q13885|TBB2A_HUMAN:Q13509|TBB3_HUMAN:Q9BUF5|TBB6_HUMAN
ASTEVGEMAK	10.6	915360	1306600	759620	1025600	P27144|KAD4_HUMAN
QEVISTSSK	2.5	9732100	19750000	10662000	7830000	P63244|RACK1_HUMAN
FAEALGSTEAK	2.7	1366400	2139000	1537600	1206400	P78347|GTF2I_HUMAN
IPAMTIAK	11.3	17189000	16518000	9634800	5867000	P10809|CH60_HUMAN
EYDELAETQGK	10.2	950230	587170	825090	354320	O60341|KDM1A_HUMAN
VSDYEMK	6.4	3781200	6835400	4541600	3705300	P12004|PCNA_HUMAN
GLVAEGHR	12.9	839900	1880400	1158500	320690	P18206|VINC_HUMAN
ITITNDKGR	7.9	7183700	10207000	8552900	7293000	P11142|HSP7C_HUMAN:P0DMV8|HS71A_HUMAN:P0DMV9|HS71B_HUMAN:P54652|HSP72_HUMAN
SLLIDFFR	7.7	1680200	2696000	828940	977570	Q9H7B2|RPF2_HUMAN
KTVGVEPAADGK	5.6	3724800	3841500	2851500	1903800	P46779|RL28_HUMAN
IGGVQQDTILAEGLHFR	2.6	18732000	4048200	10538000	10273000	Q99623|PHB2_HUMAN
IGNVEISQVTIVGIIR	0.3	463680	0	414980	669260	P15927|RFA2_HUMAN
YHTINGHNAEVR	3.6	36902000	52670000	32408000	19249000	P22626|ROA2_HUMAN
MMNGGHYTYSENR	4.1	5386400	9272300	7085700	5187600	Q99497|PARK7_HUMAN
EGVSAAFAVK	3.3	13337000	2775500	24823000	23400000	Q7L1Q6|BZW1_HUMAN
EGAFSNFPISEETIK	2.8	6187100	8202900	8633600	4875300	Q9NR30|DDX21_HUMAN:Q9BQ39|DDX50_HUMAN
LIALLEVLSQK	3.3	8612200	2721700	14095000	11794000	P21333|FLNA_HUMAN:O75369|FLNB_HUMAN:Q14315|FLNC_HUMAN
NVVYPLYR	6.7	3385200	4501100	3972200	3986200	Q16540|RM23_HUMAN
QKLEEDAEMK	2.7	2819400	3278100	3175800	2094000	P05455|LA_HUMAN
DRPQEADGIDSVIVVDNVPQVGPDR	0.3	3031700	0	5878800	6248200	P55884|EIF3B_HUMAN
QYDIDDAIAK	5.3	23424000	5690200	75818000	7601900	Q15149|PLEC_HUMAN
VELSQLR	3.7	8345300	13932000	9634800	7890400	P42766|RL35_HUMAN:P47985|UCRI_HUMAN
LIDLHSPSEIVK	3.8	53626000	36496000	38368000	31140000	P60866|RS20_HUMAN
HLTGEFEK	3.4	29039000	39606000	39811000	28337000	P62826|RAN_HUMAN
EQILEEFSK	3.6	10757000	19351000	8012300	8435300	O60506|HNRPQ_HUMAN
AQLGGPEAAK	3	19858000	24612000	19367000	12800000	P04792|HSPB1_HUMAN
LNGLENR	7.8	826470	524840	1596100	1033000	O75369|FLNB_HUMAN
ADDTSAATIEK	2.5	823330	1704300	761490	417690	Q9Y2W2|WBP11_HUMAN
ISEIEDAAFLAR	10.9	3174300	1849600	3451800	1414000	O94905|ERLN2_HUMAN:O75477|ERLN1_HUMAN
HGVVPLATYMR	9.1	60635000	46229000	49156000	50739000	P46778|RL21_HUMAN
MQVDQEEPHVEEQQQQTPAENK	4.6	5502900	8950200	7678300	5382900	P34932|HSP74_HUMAN
LAGTQPLEVLEAVQR	3.3	15120000	14068000	23001000	14772000	P22314|UBA1_HUMAN
DIIHDPGR	3.3	18528000	18962000	13681000	10748000	P62917|RL8_HUMAN
GLQQQNSDWYLK	2.5	4700100	3943100	6715300	7566500	P46940|IQGA1_HUMAN
VNVTTEVK	8.7	1178100	2394600	1359200	756590	P68104|EF1A1_HUMAN
GGIGTVPVGR	3.5	11118000	11182000	22397000	10893000	P68104|EF1A1_HUMAN:Q05639|EF1A2_HUMAN
AAAAAWEEPSSGNGTAR	2.9	1589600	1721200	1451700	1289700	Q9P258|RCC2_HUMAN
M(+42.01)DPNTIIEALR	2.8	1537100	168830	1677200	1294400	O95373|IPO7_HUMAN
INELTGIK	10.4	4687700	3732300	8954600	5351000	P35998|PRS7_HUMAN
DGLEMEK	2.4	3885900	3539700	6692700	4446500	P13693|TCTP_HUMAN
GMTHIVR	5.5	2388200	2609700	1103300	961810	P39023|RL3_HUMAN
DALSDLALHFLNK	3.1	4686600	2583400	4756200	4876700	P50991|TCPD_HUMAN
ALGQNPTNAEVLK	4	34050000	54311000	36141000	38382000	P60660|MYL6_HUMAN:P14649|MYL6B_HUMAN
ALADTENLR	5.1	6936800	9196600	8861100	7742800	Q9HAV7|GRPE1_HUMAN
EQSQLTATQTR	2.9	2546700	5132800	1094600	915030	Q6P2Q9|PRP8_HUMAN
AGVAPLQVK	2.9	7447800	8613900	9495100	9144000	P21333|FLNA_HUMAN
ISMPDIDLNLK	4.5	9806100	1802400	13719000	19515000	Q09666|AHNK_HUMAN
DSRPSQAAGDNQGDEAK	2.8	641140	1651300	460280	329370	Q9Y2W1|TR150_HUMAN
VVLAYEPVWAIGTGK	7.9	13686000	12663000	2207600	20389000	P60174|TPIS_HUMAN
EHALLAY	3.2	24598000	23629000	37776000	36986000	P68104|EF1A1_HUMAN:Q05639|EF1A2_HUMAN
LSGSNPYTTVTPQIINSK	4.9	28558000	39376000	31154000	35182000	O43707|ACTN4_HUMAN
VLESLDR	11.6	11246000	16033000	13683000	11528000	Q8WY22|BRI3B_HUMAN
EVAGHTEQLQMSR	3.2	9567700	7431900	7384700	5566700	P08727|K1C19_HUMAN
LVDQNLNK	9.5	1647100	1581700	1349800	1148600	O60264|SMCA5_HUMAN
WGMPPQDAFTTQWLVR	7.4	702180	0	0	1660700	Q12873|CHD3_HUMAN
FWEVISDEHGIDPTGTYHGDSDLQLDR	1.6	119900000	0	30173000	67409000	P07437|TBB5_HUMAN
STYEQVDLIGK	2.7	3830300	4267000	4405900	4389000	Q9NR30|DDX21_HUMAN
NFEHLIPDAPELIHDFLVNEK	7.1	7164300	0	25435000	2274900	P53618|COPB_HUMAN
QLPSAGPDK	3.5	1335500	2557200	1494900	1283400	O43768|ENSA_HUMAN
DVQEIFR	3.5	6395300	6097500	6668600	7974700	Q13838|DX39B_HUMAN:O00148|DX39A_HUMAN
EQQEAIEHIDEVQNEIDR	4.4	37611000	68136000	40749000	41560000	Q01105|SET_HUMAN
LMLLLEVISGER	0.9	495060	0	235460	477880	O43707|ACTN4_HUMAN:P12814|ACTN1_HUMAN
FVMQEEFSR	8.9	5347600	1489900	1855600	3869400	P30101|PDIA3_HUMAN
DIVNGLR	5.1	2463700	2567700	3568400	3115100	P47756|CAPZB_HUMAN
EIESSPQYR	6.1	996310	1122700	469740	1444900	Q8WWM7|ATX2L_HUMAN
LLFPAVDDNLLK	3.7	705780	347550	461330	352860	Q02880|TOP2B_HUMAN
LTNSMMMHGR	6.7	12725000	4634000	2488000	2108300	P46782|RS5_HUMAN
SLADELALVDVLEDK	1.6	10477000	1116000	12870000	26221000	P07195|LDHB_HUMAN
MIAGQVLDINLAAEPK	4	77761000	689910	22545000	29120000	P07910|HNRPC_HUMAN
T(+42.01)EQMTLR	11.8	6441600	7093300	8905600	960100	P63244|RACK1_HUMAN
RPIVGLGGGK	17.4	304010	468510	358960	388550	Q13643|FHL3_HUMAN
YGPLSGVNVVYDQR	5.7	6459600	6335800	4414900	6703700	Q13595|TRA2A_HUMAN
VPAQSESVR	7	718580	1002600	526200	1267500	P50552|VASP_HUMAN
ENDPSSVLLFLVGSK	1.2	155080	73566	281020	265720	Q9BZG1|RAB34_HUMAN
TITLEVEPSDTIENVK	9.2	65041000	47714000	52387000	41774000	P62979|RS27A_HUMAN:P62987|RL40_HUMAN
NLDQEQLSQVLDAMFER	1.4	308480	0	133570	226210	P13861|KAP2_HUMAN
PEFLEDPSVLTK	3.3	10484000	7899200	7917000	7040100	P42167|LAP2B_HUMAN:P42166|LAP2A_HUMAN
DFLLKPELLR	3.2	11551000	10521000	12564000	9882900	Q13838|DX39B_HUMAN:O00148|DX39A_HUMAN
GFDVFNALDLMENK	1	904820	13455	663300	900770	P30419|NMT1_HUMAN
DYVAPTANLDQK	3.1	7732200	10408000	7939600	10854000	Q7KZF4|SND1_HUMAN
ELPLSPAFFGEDGIFR	3.2	1886400	444530	1748500	4498600	Q96AQ6|PBIP1_HUMAN
A(+42.01)AQALALLR	3.6	919860	798360	1146100	879770	Q16401|PSMD5_HUMAN
ATVTKPVGGDK	3.7	2006800	1342800	1340800	984940	Q02878|RL6_HUMAN
QLEKDFSSMK	4.5	4785000	7094000	6718300	4052000	P39023|RL3_HUMAN
NLYIISVK	3.7	14863000	13978000	12768000	9628600	P62829|RL23_HUMAN
GIVLLEELLPK	2.1	1748500	698930	1653200	1692900	Q9Y3D6|FIS1_HUMAN
QGAIVAVTGDGVNDSPALK	3	4568700	2289000	1888400	2105900	P05023|AT1A1_HUMAN
NGPLPIPSEGSGFTK	12.9	1340900	1136700	1328200	764550	Q5VYK3|ECM29_HUMAN
HVPGGGNVQIQNK	3.6	1910200	2809500	2351900	1376100	P27816|MAP4_HUMAN
WKDEDISQK	5.3	7971300	13297000	8976000	6802700	P53701|CCHL_HUMAN
MMEIMTR	3	13397000	3876100	6766400	7329200	P61247|RS3A_HUMAN
GNEVISVMNR	4.3	8056500	5948900	6563100	6085400	P05187|PPB1_HUMAN:P09923|PPBI_HUMAN
ESTGAQVQVAGDMLPNSTER	3.1	21060000	9934000	19557000	19741000	Q15365|PCBP1_HUMAN:Q15366|PCBP2_HUMAN
SVVTGGVQSVMGSR	2.9	3123400	1437200	3808500	3434400	O60664|PLIN3_HUMAN
HWGGNVLGPK	3.1	22848000	3303100	4196900	3108900	P62424|RL7A_HUMAN
IITITGTQDQIQNAQYLLQNSVK	2.6	39975000	7167900	35338000	56132000	P61978|HNRPK_HUMAN
VGEGMEEGEFSEAR	7.6	2537900	2170500	3571200	3773800	Q9BQE3|TBA1C_HUMAN:P68366|TBA4A_HUMAN
YLQSLLAEVER	3.7	6072600	10051000	730340	11853000	O95232|LC7L3_HUMAN
GSETDSAQDQPVK	2.6	1050100	1384200	916160	806990	P30419|NMT1_HUMAN
AAVEWFDGK	4.5	2986000	2383900	4956500	4603400	Q01844|EWS_HUMAN
VYEGERPLTK	3.8	13725000	4843700	3622700	3727800	P11021|BIP_HUMAN
GVTIASGGVLPNIHPELLAK	3.5	18732000	11413000	12163000	12358000	O75367|H2AY_HUMAN
SVPTSTVFYPSDGVATEK	6.9	67977000	103400000	37413000	101530000	P29401|TKT_HUMAN
VIKPIDK	2.7	1926600	2424100	3003500	1911400	P26038|MOES_HUMAN:P15311|EZRI_HUMAN:P35241|RADI_HUMAN
ANGMELDGR	2.8	3296800	4315800	4886200	3539200	P62995|TRA2B_HUMAN:Q13595|TRA2A_HUMAN
IALLEEAR	3.1	4168200	4992100	4712300	5344800	P15311|EZRI_HUMAN
VTMQNLNDR	10.9	9579800	8810100	14735000	11466000	P13645|K1C10_HUMAN:P02533|K1C14_HUMAN:P08779|K1C16_HUMAN
ETNLDSLPLVDTHSK	3.2	98734000	116250000	114030000	114530000	P08670|VIME_HUMAN
QGFGELLQAVPLADSFR	1.4	4648200	268690	2568700	4402300	P27695|APEX1_HUMAN
DEPDWESLIFLAR	0.7	185930	0	177510	299760	P49915|GUAA_HUMAN
DNLAEDIMR	3.2	46612000	42386000	74710000	60378000	P08670|VIME_HUMAN
LALDIEIATYR	2.8	10453000	289950	2320900	5689300	P05787|K2C8_HUMAN:P08729|K2C7_HUMAN:Q6KB66|K2C80_HUMAN
A(+42.01)GTVVLDDVELR	3	4416200	3117400	5136500	5127300	P25205|MCM3_HUMAN
TAAYGHFGR	3.2	1573700	2531400	884210	936550	P31153|METK2_HUMAN
TLTAVHDAILEDLVFPSEIVGK	2.3	37041000	299670	6937200	13553000	P62081|RS7_HUMAN
VAYGGTGDAATR	3.7	2171700	3781100	2381700	2119000	P30838|AL3A1_HUMAN
PIPEEYTFIQNVPLEDR	17.3	610310	142180	520910	1065600	Q00839|HNRPU_HUMAN
SILLATDVASR	9.4	2311000	1060500	2816300	1666900	Q9H0S4|DDX47_HUMAN
RAEDGSVIDYELIDQDAR	3.4	42632000	56304000	27633000	24979000	P07355|ANXA2_HUMAN
IHPVSTMVK	8.7	9769600	12801000	10248000	13282000	P07195|LDHB_HUMAN
VLANPGNSQVAR	3.3	10048000	15020000	9222300	8383500	Q14974|IMB1_HUMAN
SPYLYPLYGLGELPQGFAR	2.7	4324600	1070900	3869400	8336200	P50395|GDIB_HUMAN:P31150|GDIA_HUMAN
TTDGVYEGVAIGGDR	3.6	8456800	8925800	11182000	13719000	P53396|ACLY_HUMAN
AAQELQEGQR	2.9	493400	999760	466890	337490	P35520|CBS_HUMAN:P0DN79|CBSL_HUMAN
VAQPTITDNKDGTVTVR	3.2	11589000	20649000	10393000	9381400	P21333|FLNA_HUMAN
VLVAQHDVYK	10.3	3386700	3841500	3341400	2868700	P13804|ETFA_HUMAN
LASTLVHLGEYQAAVDGAR	3.5	20000000	18188000	18083000	20665000	Q00610|CLH1_HUMAN
VLVNDAQK	4.1	3349500	5990700	2993000	1969700	Q13263|TIF1B_HUMAN
TNLVWDEVSGQWR	5.8	3357000	1126700	1066500	1099000	Q15050|RRS1_HUMAN
SDSFENPVLQQHFR	3.8	25510000	27756000	30448000	24071000	P12956|XRCC6_HUMAN
DLLHPSPEEEK	3.7	19162000	26112000	19576000	20886000	P42677|RS27_HUMAN
M(+15.99)ILVLPVVFETEK	1	86763	196490	0	0	Q9NS69|TOM22_HUMAN
WMEEQAQSLIDK	3.3	6271300	3540800	6453300	5214400	P09234|RU1C_HUMAN
SFTTTAER	11.7	11608000	13098000	24204000	7640900	P60709|ACTB_HUMAN:P63261|ACTG_HUMAN
LVALSEPALALLGLGAPPAR	7.1	861090	0	1048200	2325200	Q9BVL4|SELO_HUMAN
PALELLEPIEQK	4.3	1978500	2085100	2914500	2914300	P50395|GDIB_HUMAN
SNIFVIGK	3.6	5692800	7932200	7862300	6859900	P62701|RS4X_HUMAN
SLNNQFASFIDK	5.6	6654000	2017100	1773100	16951000	P04264|K2C1_HUMAN
NPPGASTYNK	6.1	808130	1780800	642070	355560	Q9BUJ2|HNRL1_HUMAN
ITGDAFK	3.5	2078000	871570	5783600	577820	Q96I24|FUBP3_HUMAN
AGLESGAEPGDGDSDTTK	2	745330	542240	436150	326040	O60832|DKC1_HUMAN
VVDLM(+15.99)AHM(+15.99)ASK	12	5508000	11489000	5911800	3843800	P04406|G3P_HUMAN
EDQTEYLEERR	5	1616400	1707800	1778600	1169800	P08238|HS90B_HUMAN:P07900|HS90A_HUMAN
PAAQETK	2.6	3751200	11914000	712950	365010	P80723|BASP1_HUMAN
EVQQGEEFER	4.8	2717400	3520500	3632200	2966500	P00568|KAD1_HUMAN
DETEFYLGK	3.6	19666000	20310000	23416000	22588000	P18077|RL35A_HUMAN
ILLNPVQVFDVTK	5.2	260820	40685	320930	589060	P52429|DGKE_HUMAN
LDLSVTEAVVAGIAK	5.2	260820	40685	320930	589060	P22102|PUR2_HUMAN
LGSLVENNER	5.5	3994800	3807100	2932700	7179600	Q99613|EIF3C_HUMAN
DLYFEGGVSSVYLWDLDHGFAGVILIK	3.5	403270	0	372510	1211700	P47756|CAPZB_HUMAN
EMEAELEDER	5.6	4941600	8026500	5886900	5627000	P35579|MYH9_HUMAN
HLEMNPH	4	1166300	2009300	1919100	736990	Q08211|DHX9_HUMAN
GPSSVEDIKAK	8.5	8088700	6300800	5019700	3814300	P06748|NPM_HUMAN
VANVSAAEDSVSQR	4.2	1961000	717650	2833100	389190	Q9NY93|DDX56_HUMAN
GDEELDSLIK	4.5	50292000	64061000	54772000	65345000	P0C0S5|H2AZ_HUMAN:Q71UI9|H2AV_HUMAN
LLSAGATK	9.9	1221700	706660	416390	406700	P11908|PRPS2_HUMAN
MAQFDAK	8.1	4842500	9101400	5533100	1534500	P26641|EF1G_HUMAN
LSDIAHR	4.5	744040	929430	1269900	591660	P04075|ALDOA_HUMAN
VFSATLGLVDIVK	2.9	2932600	207970	1140200	1556000	P09874|PARP1_HUMAN
ELASQPDVDGFLVGGASLKPEFVDIINAK	2.6	15766000	684860	1800800	38508000	P60174|TPIS_HUMAN
DTHDQLSEPSEVR	3	6802400	9245200	8462700	7491300	Q15149|PLEC_HUMAN
VGIDIFTGK	3.4	3313300	5093100	5676900	2483400	P63241|IF5A1_HUMAN
GFAFVTFESPADAK	3.7	19420000	15199000	10242000	9025200	P38159|RBMX_HUMAN
TAQEVETYRR	5.5	1089700	152530	342040	158430	P17844|DDX5_HUMAN
LKGDDLQAIKK	2.6	33898000	22424000	7386100	4786800	P07910|HNRPC_HUMAN
IPVDTYNNILTVLK	3.2	1954100	1855300	2100000	1853200	Q96QK1|VPS35_HUMAN
ALGAEIVR	2.7	1372300	1251800	2281200	1729400	P35520|CBS_HUMAN:P0DN79|CBSL_HUMAN
SPPSTGSTYGSSQK	8.1	313770	674890	193690	107830	Q9Y2W1|TR150_HUMAN
LVGPEGFVVTEAGFGADIGMEK	9.3	494200	98849	711420	426700	P11586|C1TC_HUMAN
AVDAVIAELKK	15.8	446500	0	690910	0	P10809|CH60_HUMAN
LGIHEDSQNR	3.1	21800000	32516000	21213000	15133000	P07900|HS90A_HUMAN
YSASKPLK	4	504510	1104900	524040	389130	P23526|SAHH_HUMAN
VVTSENEAGK	9.5	1739500	960140	1780300	1390900	P49321|NASP_HUMAN
DQEGQDVLLFIDNIFR	9.8	50620	0	0	184450	P06576|ATPB_HUMAN
FVADGIFK	4.3	11228000	9564700	10967000	9722500	P23396|RS3_HUMAN
ELLLQPVTISR	2.8	6150700	7500000	8351400	7173200	P59998|ARPC4_HUMAN
VTELALTASDR	3.2	4101400	2775300	3422300	3694200	P78527|PRKDC_HUMAN
DQNILLGTTYR	2.7	4338400	4476100	4204500	3546000	P78527|PRKDC_HUMAN
MGANNLER	9.4	6164900	11163000	1994800	1861100	P52272|HNRPM_HUMAN
EFNEDGALAVLQQFK	2.8	4982800	3719800	5646000	6416900	O60506|HNRPQ_HUMAN
LQAEAQQLR	3.4	1968100	2966900	1695500	1479100	Q16543|CDC37_HUMAN
LSSAYGAR	4	30461000	29585000	46152000	46107000	Q9Y4M8|CH071_HUMAN
GLPLFPLVK	4.6	380120	377500	502000	270990	P14735|IDE_HUMAN
ATAGDTHLGGEDFDNR	3.6	25438000	31323000	25712000	18106000	P0DMV8|HS71A_HUMAN:P0DMV9|HS71B_HUMAN
ILNIFGVIK	5.1	3647200	428430	0	78529	P02786|TFR1_HUMAN
TPSSDVLVFDYTK	3.5	14445000	14221000	14359000	14425000	Q16576|RBBP7_HUMAN:Q09028|RBBP4_HUMAN
A(+42.01)DGELNVDSLITR	3.3	1736300	781340	1655100	1980100	P62140|PP1B_HUMAN
VHIGQVIM	10.1	5869100	2755500	3185400	2875200	P27635|RL10_HUMAN
ELSEQIQR	2.9	7014300	9196600	8861100	7620500	P15311|EZRI_HUMAN
AADPPAENSSAPEAEQGGAE	2.4	9330400	8316500	2783100	2308200	P67809|YBOX1_HUMAN
SSNADAEEKLDR	9.5	3739100	4457700	4941600	3903300	O60828|PQBP1_HUMAN
FSDIQIR	2.1	2560300	2394900	3798800	3894100	P11586|C1TC_HUMAN
ATSSSSGSLSATGR	4.8	890470	1074700	1067200	267020	Q03252|LMNB2_HUMAN
DHYEATAMHR	3.6	574900	1260200	573110	313950	O75832|PSD10_HUMAN
LLEVEHPAAK	3.3	7967300	11609000	9464200	7213000	P17987|TCPA_HUMAN
QKPITPETAEK	5.5	9810100	11097000	7592300	12356000	P60953|CDC42_HUMAN
ITLDNAYMEK	3.2	92982000	75924000	132060000	148750000	P14618|KPYM_HUMAN
ENTQTTIK	3.6	2116500	2826400	2803500	1976500	P61978|HNRPK_HUMAN
KVEEAEPEEFVVEK	2.9	22989000	17475000	16074000	16130000	Q13185|CBX3_HUMAN
IPTISTQLK	11.2	3219900	3794000	4610100	4270100	P18206|VINC_HUMAN
DSYDSYATHNE	2.5	1405700	2038900	852080	646360	Q14011|CIRBP_HUMAN
AFSYYGPLR	5.6	9902700	2229400	3417700	3241500	Q16629|SRSF7_HUMAN
LDGEASINNR	3	1338700	1782800	2070600	1298500	O95433|AHSA1_HUMAN
ALAAPAAEEK	9.4	5613200	7929800	6938500	6726800	Q01650|LAT1_HUMAN
A(+42.01)TDTSQGELVHPK	2.9	3666000	3776900	3022100	2951100	Q5SSJ5|HP1B3_HUMAN
IAQDLEMYGINYFEIK	1	1805100	111110	739160	2522800	P15311|EZRI_HUMAN
EGYSGVGLLSR	7.5	6536000	8657100	7651500	8195900	P27695|APEX1_HUMAN
LQDEIQNMK	2.6	43935000	64955000	57744000	51124000	P08670|VIME_HUMAN
APLVLKD	3	9567300	10712000	14056000	11301000	Q99497|PARK7_HUMAN
GDDGIFDDNFIEER	4.2	1109600	1425900	1357400	1655200	O60493|SNX3_HUMAN
AIIESDQEQGR	5.9	557350	506780	894060	713140	Q12765|SCRN1_HUMAN
EPPTDVTPTFLTTGVLSTLR	3.6	1446800	1218600	2155600	1979700	P49915|GUAA_HUMAN
NLATAYDNFVELVANLK	5.2	1844500	0	2412400	3437300	Q8WUM4|PDC6I_HUMAN
GPLATGGIK	4.1	3452400	5322900	4098200	3938400	Q9Y2S6|TMA7_HUMAN
VPAFEGDDGFC(+57.02)VFESNAIAYYVSNEELR	2.2	138710	0	427270	127580	P26641|EF1G_HUMAN
GLTFQEVENFFTFLK	8.2	394520	0	659260	789310	Q9BPX6|MICU1_HUMAN
GGSISGGGYGSGGGK	7.3	1915100	3092300	3161700	770640	P35908|K22E_HUMAN
QMAEIAVNAVLTVADMER	5.5	914090	243180	659530	1300000	P48643|TCPE_HUMAN
MGPGAASGGERPNLK	2.8	7077500	7086800	6749400	5253900	Q9H0U4|RAB1B_HUMAN
IVLLDSSLEYK	7.1	7535800	2037800	11572000	7747300	P49368|TCPG_HUMAN
GTQGAEEVLR	2.8	5659300	5504100	6357300	6753900	Q15149|PLEC_HUMAN
IGQGYLIK	3.5	14917000	2778900	2355800	2410000	P39023|RL3_HUMAN
FYEAFSK	3.6	48666000	41773000	113760000	24350000	P08238|HS90B_HUMAN
FDSDAASPR	3.4	4992600	10869000	2019200	1795700	P10321|HLAC_HUMAN:P01889|HLAB_HUMAN
QKEIQEPDPTYEEK	9.8	1485200	2460200	1615000	1456000	O60264|SMCA5_HUMAN
KLFNLSK	3.5	3454200	2862400	1976400	1595300	P62753|RS6_HUMAN
FSHEEIAMATVTALR	1.8	46528000	13337000	82619000	81500000	P04075|ALDOA_HUMAN
LLLPWLEAR	3.9	3514200	93214	1562500	1186300	Q00610|CLH1_HUMAN
SYVDPSTDER	2.5	4170600	5774200	4127100	3332900	Q15149|PLEC_HUMAN
DFTPAELRR	3.7	7322300	1919700	14520000	11631000	O00264|PGRC1_HUMAN
VNIKPQVDR	4.5	3017900	2159900	4353200	4686900	P23526|SAHH_HUMAN
LITLEEEMTK	4.6	7021500	1813500	3890300	7167500	P07237|PDIA1_HUMAN
RFVNVVPTFGK	8.3	14122000	13726000	15359000	14690000	P62861|RS30_HUMAN
GAGIGGLGITVEGPSESK	2.6	4653700	4925700	5356500	5846300	O75369|FLNB_HUMAN
EPELLEPIPYEFMA	3.9	1025500	80282	2104600	1893300	P46778|RL21_HUMAN
M(+42.01)LGPEGGEGFVVK	3.1	9789400	4282400	6773300	6273100	P52597|HNRPF_HUMAN
HTDNVIQWLNAMDEIGLPK	2.5	1890600	0	581320	2311800	P46940|IQGA1_HUMAN
EAATAVEQEK	4.1	1548800	3028000	1271800	893370	O95816|BAG2_HUMAN
GLTTTGNSSLNSTSNTK	2.7	917070	1040000	552730	419120	Q96KR1|ZFR_HUMAN
MDQYFNQMEK	2.9	2259700	1960400	2454200	2486000	Q04637|IF4G1_HUMAN:O43432|IF4G3_HUMAN
ASPLFSQHTAADKHK	6.7	3975000	6537200	5255000	3306500	Q2NL82|TSR1_HUMAN
DLENGSHIR	9.8	1267400	872790	1701800	1518000	P25205|MCM3_HUMAN
DANSVTSSLR	7	1427000	1445100	1423100	2327400	Q9Y6E2|BZW2_HUMAN
GDMDVSVPK	6.7	3056400	3073000	3970400	3662300	Q09666|AHNK_HUMAN
KESYSVYVYK	5.6	120360000	92651000	38245000	40019000
LALLLSQFVGSQSVR	18.5	169580	285280	0	0	P52948|NUP98_HUMAN
YLIANATNPESK	11.1	16906000	19867000	22459000	20209000	P27348|1433T_HUMAN
TYTEHAK	3.5	10807000	878310	11314000	6364800	P62805|H4_HUMAN
IPNFWVTTF	3.8	646550	25315	991140	792490	Q01105|SET_HUMAN
LDDYQER	5.5	1738600	3778500	1411200	1764600	Q14444|CAPR1_HUMAN
VDGMNAPK	12.8	1254400	1193700	2570900	624490	P23588|IF4B_HUMAN
AAFDDAIAELDTLSEESYK	3.3	7131900	567850	6770000	18856000	P62258|1433E_HUMAN
GPLPAAPPVAPER	3.1	20581000	16244000	17707000	18056000	Q9NQC3|RTN4_HUMAN
ALTETIMFDDAIER	2.9	8477200	11880000	552960	1708800	P05187|PPB1_HUMAN
WQNNLLPSR	4.1	15792000	5201700	2686400	3638800	P62244|RS15A_HUMAN
NQVAMNPTNTVFDAK	3.7	69582000	78518000	72934000	72403000	P11142|HSP7C_HUMAN
YLYTLVITDK	3.2	2807600	1475100	3917200	4845800	P63173|RL38_HUMAN
AKGEVDVDVPK	10.3	1286700	1224700	2008700	505190	Q09666|AHNK_HUMAN
MNVFDTELK	3.4	2780300	2132800	2423700	2034900	P16615|AT2A2_HUMAN
DKYEPAAVSEQGDK	1.1	277340	0	181610	392850	P05023|AT1A1_HUMAN
AVFVDLEPTVIDEVR	3.3	187090000	19485000	104210000	131080000	Q9BQE3|TBA1C_HUMAN
GNFNYIEFTR	3.5	7696800	10605000	10287000	7945500	P19105|ML12A_HUMAN:O14950|ML12B_HUMAN
EKVESELR	9.1	5800100	7673700	6987300	5111700	P27348|1433T_HUMAN
VAFSVAR	9.3	15964000	14645000	14526000	12300000	P39023|RL3_HUMAN
DNMALQR	7.6	3063600	1446200	3573800	2675100	P38646|GRP75_HUMAN
LSEQELQFR	3.6	3120400	2477100	2756800	2633800	Q16891|MIC60_HUMAN
EKLEMEMEAAR	5.1	20532000	15577000	7484100	13036000	Q15233|NONO_HUMAN
LVVLGSGGVGK	4.4	6936200	7610100	4846400	5141800	P61224|RAP1B_HUMAN:P62834|RAP1A_HUMAN
EQLEEEEEAKHNLEK	3.5	4050500	2121200	7456100	6624800	P35579|MYH9_HUMAN
HILLAVANDEELNQLLK	8.3	8772400	3178700	4530600	6022600	O75367|H2AY_HUMAN
NLGQPIK	3.2	1463800	2302000	1811000	1354900	P34932|HSP74_HUMAN
KPHVVTVAGENR	5.2	1209300	3366600	732720	74838	Q7KZ85|SPT6H_HUMAN
AAPPDVGEER	9.2	1226200	2064300	1205700	929790	Q7L2J0|MEPCE_HUMAN
HAASTVQILGAEK	6.5	4154600	2941200	3552500	1954300	Q9Y2X3|NOP58_HUMAN
NGPEFEAR	3.6	1441900	2559600	1609700	1024300	Q15459|SF3A1_HUMAN
TPTSPLK	11.3	4005700	4518300	6076700	4525200	O60264|SMCA5_HUMAN
LTRDETNYGIPQR	7.1	5385200	2753600	1976000	1769100	P63244|RACK1_HUMAN
VSGTLDTPEK	7.3	7469200	5351900	21896000	449460	Q9BYG3|MK67I_HUMAN
ILDAVVAQEPLHR	3.1	7570500	6638000	10919000	6758200	Q15029|U5S1_HUMAN
GFQEVVTPNIFNSR	5.4	3974000	5386100	4006400	4621500	P26639|SYTC_HUMAN
SMNINLWSEITELLYKDGR	11.4	436230	0	1322900	62025	P42704|LPPRC_HUMAN
EPLLVTNGADNALR	9	3174600	943010	3149100	3484200	Q8NI36|WDR36_HUMAN
EMNDAAMFYTNR	3.3	4716600	3628200	5062000	8261700	Q01518|CAP1_HUMAN
FDTIYQILLK	2.8	890250	322650	370670	394180	Q14258|TRI25_HUMAN
MIYASSK	4.9	7164400	9558700	9208200	6366100	P23528|COF1_HUMAN:Q9Y281|COF2_HUMAN:P60981|DEST_HUMAN
SVEAAAELSAK	3.5	24083000	25784000	27138000	38619000	P20962|PTMS_HUMAN
DVNVNFEK	3.5	7375300	12729000	9031800	7538900	Q15185|TEBP_HUMAN
TVEAEAAHGTVTR	5.7	16297000	6214700	6345600	6174400	O75874|IDHC_HUMAN
ESEGEEEDEDEDLSK	3	300070	784720	151160	264390	O95218|ZRAB2_HUMAN
AMQAAGQIPATALLPTMTPDGLAVTPTPVPVVGSQMTR	1.6	9131000	107880	3379000	5143900	P26368|U2AF2_HUMAN
[truncated: 36,208 more rows]

## Sheet: BSA-angled-tip-100cells-PG
Accession	Coverage (%)	#Peptides	#Unique	PTM	Sample 1 Area	Sample 2 Area	Sample 3 Area	Avg. Mass	Description
[truncated: 3,535 more rows]

[truncated: 15 more sheets: BSA-angled-tip-100cells-peptide, BSA-angled-tip-10cells-PG, BSA-angled-tip-10cells-peptide, angled-tip-1000cells-PG, angled-tip-1000cells-peptide, angled-tip-100cells-PG, angled-tip-100cells-peptide, angled-tip-10cells-PG, angled-tip-10cells-peptide, CT-1000cells-PG, CT-1000cells-peptide, CT-100cells-PG, CT-100cells-peptide, CT-10cells-PG, CT-10cells-peptide]
