# Supplementary material for: An angled-shape tip-based strategy for highly sensitive proteomic profiling of a low number of cells
Source: Royal Society of Chemistry journal article supplement (doi:10.1039/d2ay01884e), 2023-01-01
Supplement: d2ay01884e4.xlsx [file d2ay01884e4.xlsx]

## Sheet: SP3-1000cells-PG
Accession	Coverage (%)	#Peptides	#Unique	PTM	Sample 1 Area	Sample 2 Area	Sample 3 Area	Avg. Mass	Description
P21333	74	156	142	Carbamidomethylation; Oxidation (M)	125320000	107110000	30530000	280737	Filamin-A OS=Homo sapiens OX=9606 GN=FLNA PE=1 SV=4
Q15149	61	274	262	Carbamidomethylation; Oxidation (M)	36962000	40340000	26755000	531796	Plectin OS=Homo sapiens OX=9606 GN=PLEC PE=1 SV=3
P35579	65	130	112	Carbamidomethylation; Oxidation (M); Acetylation (Protein N-term)	43858000	28398000	16051000	226530	Myosin-9 OS=Homo sapiens OX=9606 GN=MYH9 PE=1 SV=4
Q09666	58	260	259	Carbamidomethylation; Oxidation (M); Acetylation (Protein N-term)	38286000	33145000	30540000	629114	Neuroblast differentiation-associated protein AHNAK OS=Homo sapiens OX=9606 GN=AHNAK PE=1 SV=2
O75369	71	128	115	Carbamidomethylation; Oxidation (M)	23449000	20314000	14662000	278162	Filamin-B OS=Homo sapiens OX=9606 GN=FLNB PE=1 SV=2
P49327	61	108	108	Carbamidomethylation; Oxidation (M); Acetylation (Protein N-term)	15578000	12127000	20250000	273424	Fatty acid synthase OS=Homo sapiens OX=9606 GN=FASN PE=1 SV=3
P58107	30	113	104	Carbamidomethylation; Oxidation (M); Acetylation (Protein N-term)	15980000	10398000	6527700	555666	Epiplakin OS=Homo sapiens OX=9606 GN=EPPK1 PE=1 SV=3
Q14204	47	158	158	Carbamidomethylation; Oxidation (M); Acetylation (Protein N-term)	17727000	8922500	11380000	532412	Cytoplasmic dynein 1 heavy chain 1 OS=Homo sapiens OX=9606 GN=DYNC1H1 PE=1 SV=5
P08238	70	77	28	Carbamidomethylation; Oxidation (M)	17473000	23763000	15760000	83264	Heat shock protein HSP 90-beta OS=Homo sapiens OX=9606 GN=HSP90AB1 PE=1 SV=4
Q00610	58	84	84	Carbamidomethylation	27949000	14653000	13358000	191613	Clathrin heavy chain 1 OS=Homo sapiens OX=9606 GN=CLTC PE=1 SV=5
Q9Y490	53	89	81	Carbamidomethylation; Oxidation (M)	16457000	7679200	4442100	269765	Talin-1 OS=Homo sapiens OX=9606 GN=TLN1 PE=1 SV=3
P78527	38	139	138	Carbamidomethylation; Oxidation (M)	15526000	10413000	12802000	469093	DNA-dependent protein kinase catalytic subunit OS=Homo sapiens OX=9606 GN=PRKDC PE=1 SV=3
P10809	78	70	70	Carbamidomethylation; Oxidation (M)	125410000	82058000	31220000	61055	60 kDa heat shock protein mitochondrial OS=Homo sapiens OX=9606 GN=HSPD1 PE=1 SV=2
P06733	83	59	48	Carbamidomethylation; Oxidation (M)	240610000	168780000	57286000	47169	Alpha-enolase OS=Homo sapiens OX=9606 GN=ENO1 PE=1 SV=2
P14618	81	50	50	Carbamidomethylation; Oxidation (M); Acetylation (Protein N-term)	147440000	89203000	53370000	57937	Pyruvate kinase PKM OS=Homo sapiens OX=9606 GN=PKM PE=1 SV=4
P13639	66	63	62	Carbamidomethylation; Oxidation (M)	44871000	28029000	43281000	95338	Elongation factor 2 OS=Homo sapiens OX=9606 GN=EEF2 PE=1 SV=4
P60709	81	59	1	Carbamidomethylation; Oxidation (M); Acetylation (Protein N-term)	7463700	10514000	4089300	41737	Actin cytoplasmic 1 OS=Homo sapiens OX=9606 GN=ACTB PE=1 SV=1
P63261	81	59	1	Carbamidomethylation; Oxidation (M); Acetylation (Protein N-term)	12972000	7829600	2266100	41793	Actin cytoplasmic 2 OS=Homo sapiens OX=9606 GN=ACTG1 PE=1 SV=1
P05787	85	80	62	Oxidation (M)	59674000	78593000	27424000	53704	Keratin type II cytoskeletal 8 OS=Homo sapiens OX=9606 GN=KRT8 PE=1 SV=7
P11021	67	56	54	Carbamidomethylation; Oxidation (M)	29233000	34698000	17303000	72333	Endoplasmic reticulum chaperone BiP OS=Homo sapiens OX=9606 GN=HSPA5 PE=1 SV=2
P35527	71	61	60	Carbamidomethylation; Oxidation (M)	85393000	54069000	17886000	62064	Keratin type I cytoskeletal 9 OS=Homo sapiens OX=9606 GN=KRT9 PE=1 SV=3
P08670	85	71	58	Carbamidomethylation; Oxidation (M)	75577000	59258000	47986000	53652	Vimentin OS=Homo sapiens OX=9606 GN=VIM PE=1 SV=4
P04264	70	65	54	Carbamidomethylation; Oxidation (M); Acetylation (Protein N-term)	61282000	100950000	29820000	66039	Keratin type II cytoskeletal 1 OS=Homo sapiens OX=9606 GN=KRT1 PE=1 SV=6
Q08211	59	67	67	Carbamidomethylation; Oxidation (M)	9685400	11476000	9585000	140958	ATP-dependent RNA helicase A OS=Homo sapiens OX=9606 GN=DHX9 PE=1 SV=4
P13645	67	53	44	Carbamidomethylation; Oxidation (M); Acetylation (Protein N-term)	54756000	71228000	10922000	58827	Keratin type I cytoskeletal 10 OS=Homo sapiens OX=9606 GN=KRT10 PE=1 SV=6
P11142	72	57	33	Carbamidomethylation; Oxidation (M)	35259000	35406000	40016000	70898	Heat shock cognate 71 kDa protein OS=Homo sapiens OX=9606 GN=HSPA8 PE=1 SV=1
P05783	87	57	54	Oxidation (M)	41729000	48484000	20800000	48058	Keratin type I cytoskeletal 18 OS=Homo sapiens OX=9606 GN=KRT18 PE=1 SV=2
Q04695	81	50	28	Carbamidomethylation; Oxidation (M)	54915000	42851000	3674600	48106	Keratin type I cytoskeletal 17 OS=Homo sapiens OX=9606 GN=KRT17 PE=1 SV=2
P35908	85	54	41	Carbamidomethylation; Oxidation (M)	16287000	37224000	5458200	65433	Keratin type II cytoskeletal 2 epidermal OS=Homo sapiens OX=9606 GN=KRT2 PE=1 SV=2
P07437	84	44	8	Carbamidomethylation; Oxidation (M)	28487000	13283000	14426000	49671	Tubulin beta chain OS=Homo sapiens OX=9606 GN=TUBB PE=1 SV=2
O75643	49	79	79	Carbamidomethylation	4488300	7434700	6841000	244505	U5 small nuclear ribonucleoprotein 200 kDa helicase OS=Homo sapiens OX=9606 GN=SNRNP200 PE=1 SV=2
Q6P2Q9	47	89	89	Carbamidomethylation; Oxidation (M); Acetylation (Protein N-term)	5433000	6649700	6248000	273599	Pre-mRNA-processing-splicing factor 8 OS=Homo sapiens OX=9606 GN=PRPF8 PE=1 SV=2
Q71U36	85	41	1	Carbamidomethylation; Oxidation (M)	344210	84257	366970	50136	Tubulin alpha-1A chain OS=Homo sapiens OX=9606 GN=TUBA1A PE=1 SV=1
Q9BQE3	81	41	2	Carbamidomethylation; Oxidation (M)	6893500	2311300	2368100	49895	Tubulin alpha-1C chain OS=Homo sapiens OX=9606 GN=TUBA1C PE=1 SV=1
P46940	62	82	77	Carbamidomethylation; Oxidation (M); Acetylation (Protein N-term)	15883000	6325400	9025800	189251	Ras GTPase-activating-like protein IQGAP1 OS=Homo sapiens OX=9606 GN=IQGAP1 PE=1 SV=1
P55072	67	56	56	Carbamidomethylation; Oxidation (M); Acetylation (Protein N-term)	26229000	18897000	8040400	89322	Transitional endoplasmic reticulum ATPase OS=Homo sapiens OX=9606 GN=VCP PE=1 SV=4
P29401	79	47	47	Carbamidomethylation; Oxidation (M); Acetylation (Protein N-term)	20242000	35137000	11326000	67878	Transketolase OS=Homo sapiens OX=9606 GN=TKT PE=1 SV=3
P19338	54	58	58	Carbamidomethylation; Oxidation (M)	27474000	26021000	11499000	76615	Nucleolin OS=Homo sapiens OX=9606 GN=NCL PE=1 SV=3
P09651	63	46	41	Carbamidomethylation; Oxidation (M)	28388000	22369000	29545000	38747	Heterogeneous nuclear ribonucleoprotein A1 OS=Homo sapiens OX=9606 GN=HNRNPA1 PE=1 SV=5
Q92616	40	83	83	Carbamidomethylation; Acetylation (Protein N-term)	15595000	7432200	7483800	292756	eIF-2-alpha kinase activator GCN1 OS=Homo sapiens OX=9606 GN=GCN1 PE=1 SV=6
Q14697	57	46	46	Carbamidomethylation; Oxidation (M)	14433000	10032000	16351000	106874	Neutral alpha-glucosidase AB OS=Homo sapiens OX=9606 GN=GANAB PE=1 SV=3
Q00839	53	62	62	Carbamidomethylation; Oxidation (M); Acetylation (Protein N-term)	11570000	19318000	17085000	90585	Heterogeneous nuclear ribonucleoprotein U OS=Homo sapiens OX=9606 GN=HNRNPU PE=1 SV=6
P42704	65	74	73	Carbamidomethylation; Oxidation (M)	4868600	4182000	7560100	157904	Leucine-rich PPR motif-containing protein mitochondrial OS=Homo sapiens OX=9606 GN=LRPPRC PE=1 SV=3
P02545	73	61	59	Carbamidomethylation; Oxidation (M); Acetylation (Protein N-term)	8762700	33010000	14066000	74140	Prelamin-A/C OS=Homo sapiens OX=9606 GN=LMNA PE=1 SV=1
P80723	94	38	38		5308500	22113000	1734200	22693	Brain acid soluble protein 1 OS=Homo sapiens OX=9606 GN=BASP1 PE=1 SV=2
P52272	76	52	51	Carbamidomethylation; Oxidation (M); Acetylation (Protein N-term)	7690100	8264200	6483900	77516	Heterogeneous nuclear ribonucleoprotein M OS=Homo sapiens OX=9606 GN=HNRNPM PE=1 SV=3
P22626	88	52	45	Carbamidomethylation; Oxidation (M)	20708000	19933000	13071000	37430	Heterogeneous nuclear ribonucleoproteins A2/B1 OS=Homo sapiens OX=9606 GN=HNRNPA2B1 PE=1 SV=2
P07814	59	71	71	Carbamidomethylation; Acetylation (Protein N-term)	6277700	5533500	4225800	170590	Bifunctional glutamate/proline--tRNA ligase OS=Homo sapiens OX=9606 GN=EPRS1 PE=1 SV=5
P14625	65	60	55	Carbamidomethylation; Oxidation (M)	13591000	15182000	11686000	92469	Endoplasmin OS=Homo sapiens OX=9606 GN=HSP90B1 PE=1 SV=1
P07355	79	46	46	Carbamidomethylation; Oxidation (M); Acetylation (Protein N-term)	42972000	52964000	42991000	38604	Annexin A2 OS=Homo sapiens OX=9606 GN=ANXA2 PE=1 SV=2
P11388	50	75	57	Carbamidomethylation; Acetylation (Protein N-term)	7405400	3460700	4796800	174384	DNA topoisomerase 2-alpha OS=Homo sapiens OX=9606 GN=TOP2A PE=1 SV=3
P22314	62	45	45	Carbamidomethylation; Oxidation (M)	18651000	10125000	10161000	117849	Ubiquitin-like modifier-activating enzyme 1 OS=Homo sapiens OX=9606 GN=UBA1 PE=1 SV=3
P26038	77	53	40	Carbamidomethylation; Oxidation (M)	15733000	12290000	3477300	67820	Moesin OS=Homo sapiens OX=9606 GN=MSN PE=1 SV=3
P04075	91	44	38	Carbamidomethylation; Oxidation (M)	65632000	52538000	46005000	39420	Fructose-bisphosphate aldolase A OS=Homo sapiens OX=9606 GN=ALDOA PE=1 SV=2
P68366	72	37	6	Carbamidomethylation; Oxidation (M)	4265800	2139200	923610	49924	Tubulin alpha-4A chain OS=Homo sapiens OX=9606 GN=TUBA4A PE=1 SV=1
P31939	82	41	41	Carbamidomethylation; Oxidation (M); Acetylation (Protein N-term)	16056000	6968900	5565900	64616	Bifunctional purine biosynthesis protein ATIC OS=Homo sapiens OX=9606 GN=ATIC PE=1 SV=3
P25705	67	40	40	Carbamidomethylation; Oxidation (M)	24686000	22640000	17969000	59751	ATP synthase subunit alpha mitochondrial OS=Homo sapiens OX=9606 GN=ATP5F1A PE=1 SV=1
P09874	60	54	53	Carbamidomethylation; Acetylation (Protein N-term)	2833400	3448900	3700000	113084	Poly [ADP-ribose] polymerase 1 OS=Homo sapiens OX=9606 GN=PARP1 PE=1 SV=4
P12814	72	54	33	Carbamidomethylation; Oxidation (M); Acetylation (Protein N-term)	9743300	5039700	13656000	103058	Alpha-actinin-1 OS=Homo sapiens OX=9606 GN=ACTN1 PE=1 SV=2
Q9NZM1	36	61	61	Carbamidomethylation	2641900	3534400	4417600	234706	Myoferlin OS=Homo sapiens OX=9606 GN=MYOF PE=1 SV=1
P78371	80	37	37	Carbamidomethylation; Oxidation (M); Acetylation (Protein N-term)	19697000	10009000	9772800	57488	T-complex protein 1 subunit beta OS=Homo sapiens OX=9606 GN=CCT2 PE=1 SV=4
P30101	75	45	43	Carbamidomethylation; Oxidation (M)	16603000	19895000	10020000	56782	Protein disulfide-isomerase A3 OS=Homo sapiens OX=9606 GN=PDIA3 PE=1 SV=4
P00558	87	42	36	Carbamidomethylation; Oxidation (M)	39098000	30438000	21748000	44615	Phosphoglycerate kinase 1 OS=Homo sapiens OX=9606 GN=PGK1 PE=1 SV=3
P46013	40	87	87		3604600	5518900	2957600	358695	Proliferation marker protein Ki-67 OS=Homo sapiens OX=9606 GN=MKI67 PE=1 SV=2
P23246	58	49	47	Carbamidomethylation; Oxidation (M)	10664000	14830000	9305000	76150	Splicing factor proline- and glutamine-rich OS=Homo sapiens OX=9606 GN=SFPQ PE=1 SV=2
P11940	67	43	10	Carbamidomethylation; Oxidation (M); Acetylation (Protein N-term)	1554900	1765100	1288800	70671	Polyadenylate-binding protein 1 OS=Homo sapiens OX=9606 GN=PABPC1 PE=1 SV=2
P07237	80	39	39	Carbamidomethylation; Oxidation (M)	21133000	23528000	7224700	57116	Protein disulfide-isomerase OS=Homo sapiens OX=9606 GN=P4HB PE=1 SV=3
P18206	60	54	53	Carbamidomethylation; Oxidation (M)	6721800	9789700	3708900	123799	Vinculin OS=Homo sapiens OX=9606 GN=VCL PE=1 SV=4
P05023	48	46	40	Carbamidomethylation; Oxidation (M)	2734600	5993400	3427600	112896	Sodium/potassium-transporting ATPase subunit alpha-1 OS=Homo sapiens OX=9606 GN=ATP1A1 PE=1 SV=1
P26599	72	25	22	Carbamidomethylation; Oxidation (M); Acetylation (Protein N-term)	13906000	4851800	4483500	57221	Polypyrimidine tract-binding protein 1 OS=Homo sapiens OX=9606 GN=PTBP1 PE=1 SV=1
Q9NR30	55	44	41	Carbamidomethylation; Oxidation (M)	6013500	11808000	6611700	87344	Nucleolar RNA helicase 2 OS=Homo sapiens OX=9606 GN=DDX21 PE=1 SV=5
P36578	55	40	40	Carbamidomethylation; Oxidation (M)	6109200	6048300	14013000	47697	60S ribosomal protein L4 OS=Homo sapiens OX=9606 GN=RPL4 PE=1 SV=5
P06576	71	28	28	Oxidation (M)	43700000	28079000	12484000	56560	ATP synthase subunit beta mitochondrial OS=Homo sapiens OX=9606 GN=ATP5F1B PE=1 SV=3
P49792	25	56	35	Carbamidomethylation	11400000	1600400	3155100	358201	E3 SUMO-protein ligase RanBP2 OS=Homo sapiens OX=9606 GN=RANBP2 PE=1 SV=2
P49411	79	35	35	Carbamidomethylation; Oxidation (M)	5833900	7606000	5835600	49542	Elongation factor Tu mitochondrial OS=Homo sapiens OX=9606 GN=TUFM PE=1 SV=2
P39023	62	34	34	Carbamidomethylation; Oxidation (M)	9184300	7749100	6832400	46109	60S ribosomal protein L3 OS=Homo sapiens OX=9606 GN=RPL3 PE=1 SV=2
O60506	62	39	30	Carbamidomethylation; Oxidation (M); Acetylation (Protein N-term)	8118100	4540100	2858800	69603	Heterogeneous nuclear ribonucleoprotein Q OS=Homo sapiens OX=9606 GN=SYNCRIP PE=1 SV=2
Q13509	67	33	7	Carbamidomethylation; Oxidation (M)	1570200	496680	1486700	50433	Tubulin beta-3 chain OS=Homo sapiens OX=9606 GN=TUBB3 PE=1 SV=2
P02786	53	43	43	Carbamidomethylation; Oxidation (M)	5420300	8273200	7317200	84871	Transferrin receptor protein 1 OS=Homo sapiens OX=9606 GN=TFRC PE=1 SV=2
P61978	61	33	33	Carbamidomethylation; Acetylation (Protein N-term)	32557000	15292000	18934000	50976	Heterogeneous nuclear ribonucleoprotein K OS=Homo sapiens OX=9606 GN=HNRNPK PE=1 SV=1
Q12906	68	54	47	Carbamidomethylation; Oxidation (M)	5872200	4980900	9308300	95339	Interleukin enhancer-binding factor 3 OS=Homo sapiens OX=9606 GN=ILF3 PE=1 SV=3
P49736	56	39	38	Carbamidomethylation; Oxidation (M); Acetylation (Protein N-term)	3748800	2689900	2409800	101896	DNA replication licensing factor MCM2 OS=Homo sapiens OX=9606 GN=MCM2 PE=1 SV=4
P08195	52	35	35	Carbamidomethylation; Oxidation (M); Acetylation (Protein N-term)	14570000	11620000	15838000	67994	4F2 cell-surface antigen heavy chain OS=Homo sapiens OX=9606 GN=SLC3A2 PE=1 SV=3
Q06830	77	27	23	Carbamidomethylation; Oxidation (M)	18223000	44377000	25490000	22110	Peroxiredoxin-1 OS=Homo sapiens OX=9606 GN=PRDX1 PE=1 SV=1
P12956	64	44	44	Oxidation (M); Acetylation (Protein N-term)	16786000	10938000	7413900	69843	X-ray repair cross-complementing protein 6 OS=Homo sapiens OX=9606 GN=XRCC6 PE=1 SV=2
P33991	59	38	38	Carbamidomethylation; Oxidation (M)	7318300	3269200	5165500	96558	DNA replication licensing factor MCM4 OS=Homo sapiens OX=9606 GN=MCM4 PE=1 SV=5
Q86UP2	47	53	53		13207000	8524300	8674100	156275	Kinectin OS=Homo sapiens OX=9606 GN=KTN1 PE=1 SV=1
Q15029	62	43	42	Carbamidomethylation	4028100	2093200	3943200	109436	116 kDa U5 small nuclear ribonucleoprotein component OS=Homo sapiens OX=9606 GN=EFTUD2 PE=1 SV=1
P04083	69	29	29	Carbamidomethylation; Oxidation (M); Acetylation (Protein N-term)	15604000	14058000	11695000	38714	Annexin A1 OS=Homo sapiens OX=9606 GN=ANXA1 PE=1 SV=2
P50990	69	39	39	Carbamidomethylation	6908800	7859300	9193000	59621	T-complex protein 1 subunit theta OS=Homo sapiens OX=9606 GN=CCT8 PE=1 SV=4
O76021	49	31	31	Carbamidomethylation; Oxidation (M); Acetylation (Protein N-term)	2380800	2263500	3739500	54973	Ribosomal L1 domain-containing protein 1 OS=Homo sapiens OX=9606 GN=RSL1D1 PE=1 SV=3
P60174	90	24	24	Carbamidomethylation; Oxidation (M)	36633000	33522000	20249000	26669	Triosephosphate isomerase OS=Homo sapiens OX=9606 GN=TPI1 PE=1 SV=4
P48643	77	35	33	Carbamidomethylation; Oxidation (M); Acetylation (Protein N-term)	9102200	5771300	7537500	59671	T-complex protein 1 subunit epsilon OS=Homo sapiens OX=9606 GN=CCT5 PE=1 SV=1
O75533	48	46	46	Carbamidomethylation; Oxidation (M)	5069700	2101000	2002100	145830	Splicing factor 3B subunit 1 OS=Homo sapiens OX=9606 GN=SF3B1 PE=1 SV=3
P31040	61	26	26	Carbamidomethylation	5370500	3847400	2204500	72692	Succinate dehydrogenase [ubiquinone] flavoprotein subunit mitochondrial OS=Homo sapiens OX=9606 GN=SDHA PE=1 SV=2
Q7KZF4	59	43	43	Carbamidomethylation; Oxidation (M)	4463100	5047200	4655600	101997	Staphylococcal nuclease domain-containing protein 1 OS=Homo sapiens OX=9606 GN=SND1 PE=1 SV=1
P08727	79	39	25		1659700	15182000	3124100	44106	Keratin type I cytoskeletal 19 OS=Homo sapiens OX=9606 GN=KRT19 PE=1 SV=4
P13010	65	37	37	Carbamidomethylation; Oxidation (M)	80509000	5789600	38249000	82705	X-ray repair cross-complementing protein 5 OS=Homo sapiens OX=9606 GN=XRCC5 PE=1 SV=3
P13929	45	18	8	Carbamidomethylation; Oxidation (M)	2422700	671540	1166300	46987	Beta-enolase OS=Homo sapiens OX=9606 GN=ENO3 PE=1 SV=5
P17844	64	50	38	Carbamidomethylation; Oxidation (M)	3313200	4359400	9166500	69148	Probable ATP-dependent RNA helicase DDX5 OS=Homo sapiens OX=9606 GN=DDX5 PE=1 SV=1
Q99832	69	35	35	Carbamidomethylation; Oxidation (M); Acetylation (Protein N-term)	5606300	4633800	4037400	59367	T-complex protein 1 subunit eta OS=Homo sapiens OX=9606 GN=CCT7 PE=1 SV=2
P11586	57	41	40	Carbamidomethylation; Oxidation (M); Acetylation (Protein N-term)	7218500	5992600	4056200	101531	C-1-tetrahydrofolate synthase cytoplasmic OS=Homo sapiens OX=9606 GN=MTHFD1 PE=1 SV=4
P16615	35	32	32	Carbamidomethylation; Oxidation (M)	3431200	3469300	2068600	114757	Sarcoplasmic/endoplasmic reticulum calcium ATPase 2 OS=Homo sapiens OX=9606 GN=ATP2A2 PE=1 SV=1
P40939	61	35	35	Carbamidomethylation; Oxidation (M)	6332400	3148200	3730200	83000	Trifunctional enzyme subunit alpha mitochondrial OS=Homo sapiens OX=9606 GN=HADHA PE=1 SV=2
P43243	49	39	39	Carbamidomethylation; Oxidation (M)	4902800	3491700	7272500	94623	Matrin-3 OS=Homo sapiens OX=9606 GN=MATR3 PE=1 SV=2
Q13310	57	33	19	Carbamidomethylation; Oxidation (M); Acetylation (Protein N-term)	1052700	1330500	3475200	70783	Polyadenylate-binding protein 4 OS=Homo sapiens OX=9606 GN=PABPC4 PE=1 SV=1
P20810	56	31	31	Carbamidomethylation; Oxidation (M)	8460600	6055000	721980	76573	Calpastatin OS=Homo sapiens OX=9606 GN=CAST PE=1 SV=4
P21399	43	27	27	Carbamidomethylation; Oxidation (M); Acetylation (Protein N-term)	9505600	3196700	1128000	98399	Cytoplasmic aconitate hydratase OS=Homo sapiens OX=9606 GN=ACO1 PE=1 SV=3
P53396	51	47	47	Carbamidomethylation; Oxidation (M)	9671700	10326000	7568900	120839	ATP-citrate synthase OS=Homo sapiens OX=9606 GN=ACLY PE=1 SV=3
P11498	49	40	40	Carbamidomethylation	3100900	1849300	2563400	129634	Pyruvate carboxylase mitochondrial OS=Homo sapiens OX=9606 GN=PC PE=1 SV=2
P27824	64	38	38	Carbamidomethylation; Oxidation (M)	7412900	8936900	12056000	67568	Calnexin OS=Homo sapiens OX=9606 GN=CANX PE=1 SV=2
P34897	66	27	26	Carbamidomethylation; Oxidation (M)	4586300	4228600	8444400	55993	Serine hydroxymethyltransferase mitochondrial OS=Homo sapiens OX=9606 GN=SHMT2 PE=1 SV=3
Q07065	54	25	25		1842600	2238500	2071600	66023	Cytoskeleton-associated protein 4 OS=Homo sapiens OX=9606 GN=CKAP4 PE=1 SV=2
O60841	44	43	42	Carbamidomethylation; Oxidation (M)	3978600	1397100	3391400	138827	Eukaryotic translation initiation factor 5B OS=Homo sapiens OX=9606 GN=EIF5B PE=1 SV=4
P15311	66	44	30	Carbamidomethylation; Oxidation (M)	5799900	6281000	2515100	69413	Ezrin OS=Homo sapiens OX=9606 GN=EZR PE=1 SV=4
P63244	90	25	25	Carbamidomethylation; Oxidation (M); Acetylation (Protein N-term)	5281700	9621300	10348000	35077	Receptor of activated protein C kinase 1 OS=Homo sapiens OX=9606 GN=RACK1 PE=1 SV=3
P06748	64	23	23	Carbamidomethylation; Oxidation (M); Acetylation (Protein N-term)	54713000	19580000	16398000	32575	Nucleophosmin OS=Homo sapiens OX=9606 GN=NPM1 PE=1 SV=2
P61247	71	35	35	Carbamidomethylation; Oxidation (M)	5019100	7987400	6815900	29945	40S ribosomal protein S3a OS=Homo sapiens OX=9606 GN=RPS3A PE=1 SV=2
Q12905	73	24	24	Carbamidomethylation; Oxidation (M)	5718600	7315700	4406500	43062	Interleukin enhancer-binding factor 2 OS=Homo sapiens OX=9606 GN=ILF2 PE=1 SV=2
P68133	51	37	5	Carbamidomethylation; Oxidation (M)	16150000	17239000	10207000	42051	Actin alpha skeletal muscle OS=Homo sapiens OX=9606 GN=ACTA1 PE=1 SV=1
P68032	51	37	5	Carbamidomethylation; Oxidation (M)	16150000	17239000	10207000	42019	Actin alpha cardiac muscle 1 OS=Homo sapiens OX=9606 GN=ACTC1 PE=1 SV=1
Q16881	59	25	24	Carbamidomethylation; Oxidation (M)	7837700	3542600	2488500	70906	Thioredoxin reductase 1 cytoplasmic OS=Homo sapiens OX=9606 GN=TXNRD1 PE=1 SV=3
P12268	58	25	22	Carbamidomethylation; Oxidation (M)	4443800	4050700	3475400	55805	Inosine-5'-monophosphate dehydrogenase 2 OS=Homo sapiens OX=9606 GN=IMPDH2 PE=1 SV=2
P15924	26	50	50	Carbamidomethylation; Oxidation (M)	3817100	2848500	2195500	331774	Desmoplakin OS=Homo sapiens OX=9606 GN=DSP PE=1 SV=3
P06744	59	28	28	Carbamidomethylation; Oxidation (M); Acetylation (Protein N-term)	18220000	10485000	13593000	63147	Glucose-6-phosphate isomerase OS=Homo sapiens OX=9606 GN=GPI PE=1 SV=4
Q15233	66	38	35	Oxidation (M)	5887900	7057300	6691000	54232	Non-POU domain-containing octamer-binding protein OS=Homo sapiens OX=9606 GN=NONO PE=1 SV=4
Q16658	74	33	33	Carbamidomethylation; Oxidation (M); Acetylation (Protein N-term)	5208800	3924300	12949000	54530	Fascin OS=Homo sapiens OX=9606 GN=FSCN1 PE=1 SV=3
P31930	72	25	24	Carbamidomethylation	4123000	2467400	2256200	52646	Cytochrome b-c1 complex subunit 1 mitochondrial OS=Homo sapiens OX=9606 GN=UQCRC1 PE=1 SV=3
P08758	79	28	28	Carbamidomethylation; Oxidation (M)	22225000	12232000	8142300	35937	Annexin A5 OS=Homo sapiens OX=9606 GN=ANXA5 PE=1 SV=2
P30041	86	28	28	Carbamidomethylation; Oxidation (M)	21149000	13102000	9968300	25035	Peroxiredoxin-6 OS=Homo sapiens OX=9606 GN=PRDX6 PE=1 SV=3
P00338	84	30	29	Carbamidomethylation; Oxidation (M); Acetylation (Protein N-term)	13089000	19427000	33968000	36689	L-lactate dehydrogenase A chain OS=Homo sapiens OX=9606 GN=LDHA PE=1 SV=2
P05187	62	24	20	Oxidation (M)	652930	1151600	637860	57954	Alkaline phosphatase placental type OS=Homo sapiens OX=9606 GN=ALPP PE=1 SV=2
P40227	58	27	27	Carbamidomethylation; Oxidation (M)	8051300	4958500	3516700	58024	T-complex protein 1 subunit zeta OS=Homo sapiens OX=9606 GN=CCT6A PE=1 SV=3
Q14974	40	29	29	Carbamidomethylation; Oxidation (M); Acetylation (Protein N-term)	9782700	5375400	4562900	97170	Importin subunit beta-1 OS=Homo sapiens OX=9606 GN=KPNB1 PE=1 SV=2
P04792	91	23	23	Oxidation (M)	17379000	12190000	4394800	22783	Heat shock protein beta-1 OS=Homo sapiens OX=9606 GN=HSPB1 PE=1 SV=2
P27816	40	36	36	Carbamidomethylation; Acetylation (Protein N-term)	4183700	3017700	1786700	121005	Microtubule-associated protein 4 OS=Homo sapiens OX=9606 GN=MAP4 PE=1 SV=3
P26641	70	29	29	Carbamidomethylation; Oxidation (M); Acetylation (Protein N-term)	7560700	15500000	24333000	50119	Elongation factor 1-gamma OS=Homo sapiens OX=9606 GN=EEF1G PE=1 SV=3
O14980	41	37	37	Carbamidomethylation; Oxidation (M); Acetylation (Protein N-term)	4122800	1986000	5206500	123386	Exportin-1 OS=Homo sapiens OX=9606 GN=XPO1 PE=1 SV=1
P51991	53	32	29	Carbamidomethylation; Oxidation (M); Acetylation (Protein N-term)	7931000	4793200	3439200	39595	Heterogeneous nuclear ribonucleoprotein A3 OS=Homo sapiens OX=9606 GN=HNRNPA3 PE=1 SV=2
Q14690	29	39	39		3912500	2634800	3589500	208699	Protein RRP5 homolog OS=Homo sapiens OX=9606 GN=PDCD11 PE=1 SV=3
P62805	62	35	35	Oxidation (M)	12677000	73990000	52145000	11367	Histone H4 OS=Homo sapiens OX=9606 GN=H4C1 PE=1 SV=2
P34932	59	38	33	Carbamidomethylation; Acetylation (Protein N-term)	2699700	2508900	1988900	94331	Heat shock 70 kDa protein 4 OS=Homo sapiens OX=9606 GN=HSPA4 PE=1 SV=4
Q92499	51	35	35	Carbamidomethylation	2783300	3462600	5266200	82432	ATP-dependent RNA helicase DDX1 OS=Homo sapiens OX=9606 GN=DDX1 PE=1 SV=2
Q02878	58	32	32	Acetylation (Protein N-term)	2333500	9375000	6226900	32728	60S ribosomal protein L6 OS=Homo sapiens OX=9606 GN=RPL6 PE=1 SV=3
P38919	62	23	18	Carbamidomethylation; Oxidation (M); Acetylation (Protein N-term)	3934100	1373500	1449700	46871	Eukaryotic initiation factor 4A-III OS=Homo sapiens OX=9606 GN=EIF4A3 PE=1 SV=4
P11413	62	27	27	Carbamidomethylation; Oxidation (M); Acetylation (Protein N-term)	4987400	4088100	2995400	59257	Glucose-6-phosphate 1-dehydrogenase OS=Homo sapiens OX=9606 GN=G6PD PE=1 SV=4
Q13283	51	23	20	Carbamidomethylation; Oxidation (M); Acetylation (Protein N-term)	3951600	2650900	2949700	52164	Ras GTPase-activating protein-binding protein 1 OS=Homo sapiens OX=9606 GN=G3BP1 PE=1 SV=1
P31689	64	24	24	Carbamidomethylation; Oxidation (M)	7291900	3642600	1089100	44868	DnaJ homolog subfamily A member 1 OS=Homo sapiens OX=9606 GN=DNAJA1 PE=1 SV=2
P05388	71	22	22	Carbamidomethylation; Oxidation (M)	16384000	8501000	10105000	34274	60S acidic ribosomal protein P0 OS=Homo sapiens OX=9606 GN=RPLP0 PE=1 SV=1
P35232	80	22	22	Carbamidomethylation	7948900	9561900	12448000	29804	Prohibitin OS=Homo sapiens OX=9606 GN=PHB PE=1 SV=1
P33993	57	29	29	Carbamidomethylation	4325000	2884000	6707000	81308	DNA replication licensing factor MCM7 OS=Homo sapiens OX=9606 GN=MCM7 PE=1 SV=4
P23528	90	22	18	Carbamidomethylation; Oxidation (M); Acetylation (Protein N-term)	36266000	23129000	10626000	18502	Cofilin-1 OS=Homo sapiens OX=9606 GN=CFL1 PE=1 SV=3
P07195	55	19	18	Carbamidomethylation; Oxidation (M)	22369000	28429000	16297000	36639	L-lactate dehydrogenase B chain OS=Homo sapiens OX=9606 GN=LDHB PE=1 SV=2
P49321	51	23	23	Carbamidomethylation; Oxidation (M); Acetylation (Protein N-term)	2827300	2968900	910840	85238	Nuclear autoantigenic sperm protein OS=Homo sapiens OX=9606 GN=NASP PE=1 SV=2
Q9BUF5	76	31	11	Carbamidomethylation; Oxidation (M)	9643200	2111800	3207900	49857	Tubulin beta-6 chain OS=Homo sapiens OX=9606 GN=TUBB6 PE=1 SV=1
Q15084	57	22	22	Carbamidomethylation	7464900	5624100	5421500	48121	Protein disulfide-isomerase A6 OS=Homo sapiens OX=9606 GN=PDIA6 PE=1 SV=1
Q13263	62	34	34	Carbamidomethylation; Oxidation (M); Acetylation (Protein N-term)	4575700	3111000	3211200	88550	Transcription intermediary factor 1-beta OS=Homo sapiens OX=9606 GN=TRIM28 PE=1 SV=5
P50454	60	21	21	Oxidation (M)	6290400	4185900	4181400	46441	Serpin H1 OS=Homo sapiens OX=9606 GN=SERPINH1 PE=1 SV=2
P53621	42	34	33	Carbamidomethylation	2042600	1910800	2764900	138345	Coatomer subunit alpha OS=Homo sapiens OX=9606 GN=COPA PE=1 SV=2
P05141	68	25	8	Carbamidomethylation; Acetylation (Protein N-term)	544730	2577100	2129000	32852	ADP/ATP translocase 2 OS=Homo sapiens OX=9606 GN=SLC25A5 PE=1 SV=7
P31943	51	18	13	Carbamidomethylation; Oxidation (M); Acetylation (Protein N-term)	4196100	5409400	2656900	49229	Heterogeneous nuclear ribonucleoprotein H OS=Homo sapiens OX=9606 GN=HNRNPH1 PE=1 SV=4
P67809	71	23	17	Oxidation (M); Acetylation (Protein N-term)	6301000	4202300	1607700	35924	Y-box-binding protein 1 OS=Homo sapiens OX=9606 GN=YBX1 PE=1 SV=3
P08133	60	34	33	Carbamidomethylation	3537400	1741700	3917700	75873	Annexin A6 OS=Homo sapiens OX=9606 GN=ANXA6 PE=1 SV=3
Q12931	43	22	22	Oxidation (M)	4221600	2537500	1967100	80110	Heat shock protein 75 kDa mitochondrial OS=Homo sapiens OX=9606 GN=TRAP1 PE=1 SV=3
P62701	75	29	29	Carbamidomethylation; Oxidation (M)	2868500	6978800	10356000	29598	40S ribosomal protein S4 X isoform OS=Homo sapiens OX=9606 GN=RPS4X PE=1 SV=2
O15067	32	27	27	Carbamidomethylation; Oxidation (M)	3043700	1718400	2164800	144734	Phosphoribosylformylglycinamidine synthase OS=Homo sapiens OX=9606 GN=PFAS PE=1 SV=4
P09104	34	14	4	Carbamidomethylation; Oxidation (M)	1307900	124710	115580	47269	Gamma-enolase OS=Homo sapiens OX=9606 GN=ENO2 PE=1 SV=3
O00410	43	35	31	Carbamidomethylation; Oxidation (M); Acetylation (Protein N-term)	5552400	2205800	3555500	123630	Importin-5 OS=Homo sapiens OX=9606 GN=IPO5 PE=1 SV=4
O43390	61	34	26	Carbamidomethylation; Acetylation (Protein N-term)	7192900	5400800	2813700	70943	Heterogeneous nuclear ribonucleoprotein R OS=Homo sapiens OX=9606 GN=HNRNPR PE=1 SV=1
P42167	57	20	9	Carbamidomethylation	663310	643830	347180	50670	Lamina-associated polypeptide 2 isoforms beta/gamma OS=Homo sapiens OX=9606 GN=TMPO PE=1 SV=2
P04844	52	23	23		1517600	2368300	1036200	69284	Dolichyl-diphosphooligosaccharide--protein glycosyltransferase subunit 2 OS=Homo sapiens OX=9606 GN=RPN2 PE=1 SV=3
P14923	47	26	23	Carbamidomethylation; Acetylation (Protein N-term)	785840	1349200	2464000	81745	Junction plakoglobin OS=Homo sapiens OX=9606 GN=JUP PE=1 SV=3
Q96HC4	37	15	15	Carbamidomethylation; Oxidation (M); Acetylation (Protein N-term)	2936100	1681100	696360	63945	PDZ and LIM domain protein 5 OS=Homo sapiens OX=9606 GN=PDLIM5 PE=1 SV=5
P20700	69	43	38	Carbamidomethylation; Oxidation (M); Acetylation (Protein N-term)	3175600	5276200	9294900	66408	Lamin-B1 OS=Homo sapiens OX=9606 GN=LMNB1 PE=1 SV=2
P42765	80	23	23	Carbamidomethylation; Oxidation (M)	35270000	1908400	1670100	41924	3-ketoacyl-CoA thiolase mitochondrial OS=Homo sapiens OX=9606 GN=ACAA2 PE=1 SV=2
Q8NC51	67	25	24	Carbamidomethylation	1346900	2668600	1871100	44965	Plasminogen activator inhibitor 1 RNA-binding protein OS=Homo sapiens OX=9606 GN=SERBP1 PE=1 SV=2
O75694	26	26	26	Carbamidomethylation; Oxidation (M)	4406800	2291500	2218800	155199	Nuclear pore complex protein Nup155 OS=Homo sapiens OX=9606 GN=NUP155 PE=1 SV=1
Q9Y2X3	48	24	24	Carbamidomethylation; Oxidation (M)	1503900	890320	1265000	59578	Nucleolar protein 58 OS=Homo sapiens OX=9606 GN=NOP58 PE=1 SV=1
P14866	62	31	30	Carbamidomethylation; Oxidation (M)	4248900	4756000	5101000	64133	Heterogeneous nuclear ribonucleoprotein L OS=Homo sapiens OX=9606 GN=HNRNPL PE=1 SV=2
P23396	84	28	28	Carbamidomethylation; Oxidation (M)	6349600	7046400	4604800	26688	40S ribosomal protein S3 OS=Homo sapiens OX=9606 GN=RPS3 PE=1 SV=2
P18669	77	23	23	Carbamidomethylation; Oxidation (M)	17853000	10949000	6608900	28804	Phosphoglycerate mutase 1 OS=Homo sapiens OX=9606 GN=PGAM1 PE=1 SV=2
P16403	46	22	5	Acetylation (Protein N-term)	273210	2434900	572230	21365	Histone H1.2 OS=Homo sapiens OX=9606 GN=H1-2 PE=1 SV=2
P40926	69	22	22	Carbamidomethylation; Oxidation (M)	18768000	14223000	11498000	35503	Malate dehydrogenase mitochondrial OS=Homo sapiens OX=9606 GN=MDH2 PE=1 SV=3
P32004	28	32	32		2059700	1691700	16058000	140003	Neural cell adhesion molecule L1 OS=Homo sapiens OX=9606 GN=L1CAM PE=1 SV=2
Q14103	48	25	22	Carbamidomethylation; Oxidation (M)	4574500	8490700	3032100	38434	Heterogeneous nuclear ribonucleoprotein D0 OS=Homo sapiens OX=9606 GN=HNRNPD PE=1 SV=1
Q99497	94	17	17	Carbamidomethylation; Oxidation (M)	12298000	9925200	9010600	19891	Parkinson disease protein 7 OS=Homo sapiens OX=9606 GN=PARK7 PE=1 SV=2
P36776	40	30	30	Carbamidomethylation	8841000	1602300	9342400	106489	Lon protease homolog mitochondrial OS=Homo sapiens OX=9606 GN=LONP1 PE=1 SV=2
Q9UQ80	77	30	30	Carbamidomethylation; Oxidation (M); Acetylation (Protein N-term)	4588500	3210100	6808800	43787	Proliferation-associated protein 2G4 OS=Homo sapiens OX=9606 GN=PA2G4 PE=1 SV=3
Q9Y2W1	32	25	25		827920	3612900	1470000	108666	Thyroid hormone receptor-associated protein 3 OS=Homo sapiens OX=9606 GN=THRAP3 PE=1 SV=2
P00505	68	31	31	Carbamidomethylation; Oxidation (M)	9609700	4279300	8035200	47518	Aspartate aminotransferase mitochondrial OS=Homo sapiens OX=9606 GN=GOT2 PE=1 SV=3
P49915	56	27	27	Carbamidomethylation	1095100	1219900	3650600	76716	GMP synthase [glutamine-hydrolyzing] OS=Homo sapiens OX=9606 GN=GMPS PE=1 SV=1
P13667	60	40	39	Carbamidomethylation; Oxidation (M)	3564700	2876600	6616300	72933	Protein disulfide-isomerase A4 OS=Homo sapiens OX=9606 GN=PDIA4 PE=1 SV=2
O43175	56	22	21	Carbamidomethylation; Oxidation (M)	5639100	4639300	1519200	56651	D-3-phosphoglycerate dehydrogenase OS=Homo sapiens OX=9606 GN=PHGDH PE=1 SV=4
Q9H583	21	30	30	Carbamidomethylation; Acetylation (Protein N-term)	2647300	2621400	3459800	242368	HEAT repeat-containing protein 1 OS=Homo sapiens OX=9606 GN=HEATR1 PE=1 SV=3
P27695	75	17	17	Carbamidomethylation	3758500	1892000	1548400	35555	DNA-(apurinic or apyrimidinic site) endonuclease OS=Homo sapiens OX=9606 GN=APEX1 PE=1 SV=2
P49748	59	29	29	Carbamidomethylation	3045600	2452500	2404500	70390	Very long-chain specific acyl-CoA dehydrogenase mitochondrial OS=Homo sapiens OX=9606 GN=ACADVL PE=1 SV=1
Q9H0A0	36	28	28	Carbamidomethylation	1963200	2993200	2438800	115730	RNA cytidine acetyltransferase OS=Homo sapiens OX=9606 GN=NAT10 PE=1 SV=2
Q12797	34	23	22		4405400	2212700	2885900	85863	Aspartyl/asparaginyl beta-hydroxylase OS=Homo sapiens OX=9606 GN=ASPH PE=1 SV=3
P29692	60	18	16	Carbamidomethylation; Oxidation (M); Acetylation (Protein N-term)	3603600	8617800	3409200	31122	Elongation factor 1-delta OS=Homo sapiens OX=9606 GN=EEF1D PE=1 SV=5
P62081	73	21	21	Oxidation (M)	6320100	2474400	6662300	22127	40S ribosomal protein S7 OS=Homo sapiens OX=9606 GN=RPS7 PE=1 SV=1
P50395	69	24	16	Carbamidomethylation; Oxidation (M)	4614100	2422100	5229400	50663	Rab GDP dissociation inhibitor beta OS=Homo sapiens OX=9606 GN=GDI2 PE=1 SV=2
P21980	45	23	23	Carbamidomethylation; Acetylation (Protein N-term)	4235100	2611300	1619900	77329	Protein-glutamine gamma-glutamyltransferase 2 OS=Homo sapiens OX=9606 GN=TGM2 PE=1 SV=2
O43143	46	34	34	Carbamidomethylation; Oxidation (M)	2321800	2774500	2234700	90933	Pre-mRNA-splicing factor ATP-dependent RNA helicase DHX15 OS=Homo sapiens OX=9606 GN=DHX15 PE=1 SV=2
P36952	80	22	22	Carbamidomethylation; Oxidation (M)	5872000	5870800	8033500	42100	Serpin B5 OS=Homo sapiens OX=9606 GN=SERPINB5 PE=1 SV=2
P04843	64	34	34	Carbamidomethylation	5202100	4807400	3775300	68569	Dolichyl-diphosphooligosaccharide--protein glycosyltransferase subunit 1 OS=Homo sapiens OX=9606 GN=RPN1 PE=1 SV=1
Q15365	87	17	13	Carbamidomethylation; Oxidation (M); Acetylation (Protein N-term)	5292500	3171000	7122800	37498	Poly(rC)-binding protein 1 OS=Homo sapiens OX=9606 GN=PCBP1 PE=1 SV=2
Q9UQ35	14	27	27	Carbamidomethylation	4755400	2444300	3171400	299616	Serine/arginine repetitive matrix protein 2 OS=Homo sapiens OX=9606 GN=SRRM2 PE=1 SV=2
P32119	75	18	17	Carbamidomethylation	14270000	7475100	1661200	21892	Peroxiredoxin-2 OS=Homo sapiens OX=9606 GN=PRDX2 PE=1 SV=5
Q8IY81	40	22	22	Carbamidomethylation; Oxidation (M)	1765400	5971100	2103000	96558	pre-rRNA 2'-O-ribose RNA methyltransferase FTSJ3 OS=Homo sapiens OX=9606 GN=FTSJ3 PE=1 SV=2
P05556	35	26	26	Carbamidomethylation; Oxidation (M)	6198200	7665300	3685400	88415	Integrin beta-1 OS=Homo sapiens OX=9606 GN=ITGB1 PE=1 SV=2
P52292	47	22	22	Carbamidomethylation; Acetylation (Protein N-term)	5886100	13082000	3788800	57862	Importin subunit alpha-1 OS=Homo sapiens OX=9606 GN=KPNA2 PE=1 SV=1
O60264	42	43	41		9885700	3418100	5615500	121905	SWI/SNF-related matrix-associated actin-dependent regulator of chromatin subfamily A member 5 OS=Homo sapiens OX=9606 GN=SMARCA5 PE=1 SV=1
Q9UKV3	30	27	27	Carbamidomethylation	7502200	2835600	4631700	151861	Apoptotic chromatin condensation inducer in the nucleus OS=Homo sapiens OX=9606 GN=ACIN1 PE=1 SV=2
Q16719	54	20	20	Carbamidomethylation; Oxidation (M); Acetylation (Protein N-term)	9234900	4159900	1550800	52352	Kynureninase OS=Homo sapiens OX=9606 GN=KYNU PE=1 SV=1
Q9P2E9	28	28	28		2013200	1116700	1087200	152456	Ribosome-binding protein 1 OS=Homo sapiens OX=9606 GN=RRBP1 PE=1 SV=5
Q9UIG0	27	35	35		3652400	6506200	3255700	170902	Tyrosine-protein kinase BAZ1B OS=Homo sapiens OX=9606 GN=BAZ1B PE=1 SV=2
P55809	55	21	21	Carbamidomethylation; Oxidation (M)	11034000	3841100	1229200	56158	Succinyl-CoA:3-ketoacid coenzyme A transferase 1 mitochondrial OS=Homo sapiens OX=9606 GN=OXCT1 PE=1 SV=1
P08865	64	21	21	Carbamidomethylation; Oxidation (M); Acetylation (Protein N-term)	23479000	13010000	16317000	32854	40S ribosomal protein SA OS=Homo sapiens OX=9606 GN=RPSA PE=1 SV=4
P09211	70	15	15	Carbamidomethylation; Oxidation (M)	37872000	12918000	10421000	23356	Glutathione S-transferase P OS=Homo sapiens OX=9606 GN=GSTP1 PE=1 SV=2
P52597	48	15	13	Carbamidomethylation; Oxidation (M); Acetylation (Protein N-term)	4309500	2747500	1895000	45672	Heterogeneous nuclear ribonucleoprotein F OS=Homo sapiens OX=9606 GN=HNRNPF PE=1 SV=3
O60664	78	22	22	Carbamidomethylation; Oxidation (M); Acetylation (Protein N-term)	2394000	747680	2553200	47075	Perilipin-3 OS=Homo sapiens OX=9606 GN=PLIN3 PE=1 SV=3
Q9GZR7	44	28	28		809610	1287900	2736700	96332	ATP-dependent RNA helicase DDX24 OS=Homo sapiens OX=9606 GN=DDX24 PE=1 SV=1
P23284	62	20	19	Carbamidomethylation; Oxidation (M)	2660800	10416000	5009700	23743	Peptidyl-prolyl cis-trans isomerase B OS=Homo sapiens OX=9606 GN=PPIB PE=1 SV=2
P10412	49	23	6	Acetylation (Protein N-term)	198360	3765100	808130	21865	Histone H1.4 OS=Homo sapiens OX=9606 GN=H1-4 PE=1 SV=2
P12236	70	26	5	Carbamidomethylation; Oxidation (M); Acetylation (Protein N-term)	1625700	1778900	1216700	32866	ADP/ATP translocase 3 OS=Homo sapiens OX=9606 GN=SLC25A6 PE=1 SV=4
Q8IVT2	62	26	26		2525100	3155600	972800	75357	Mitotic interactor and substrate of PLK1 OS=Homo sapiens OX=9606 GN=MISP PE=1 SV=1
Q92945	41	25	21	Carbamidomethylation	870150	1083700	1934100	73115	Far upstream element-binding protein 2 OS=Homo sapiens OX=9606 GN=KHSRP PE=1 SV=4
P22087	60	20	20	Carbamidomethylation	1078100	1504200	2312000	33784	rRNA 2'-O-methyltransferase fibrillarin OS=Homo sapiens OX=9606 GN=FBL PE=1 SV=2
Q13838	66	25	13	Carbamidomethylation; Oxidation (M); Acetylation (Protein N-term)	864900	842240	1697100	48991	Spliceosome RNA helicase DDX39B OS=Homo sapiens OX=9606 GN=DDX39B PE=1 SV=1
P42330	68	21	9	Carbamidomethylation; Oxidation (M)	5311500	1493500	788590	36853	Aldo-keto reductase family 1 member C3 OS=Homo sapiens OX=9606 GN=AKR1C3 PE=1 SV=4
Q92973	37	26	26	Carbamidomethylation; Acetylation (Protein N-term)	1444300	1346900	2777100	102355	Transportin-1 OS=Homo sapiens OX=9606 GN=TNPO1 PE=1 SV=2
P07954	54	20	20	Carbamidomethylation; Oxidation (M)	5793000	2376800	2067800	54637	Fumarate hydratase mitochondrial OS=Homo sapiens OX=9606 GN=FH PE=1 SV=3
P17980	62	21	21	Carbamidomethylation; Oxidation (M); Acetylation (Protein N-term)	3344400	1451800	1783200	49204	26S proteasome regulatory subunit 6A OS=Homo sapiens OX=9606 GN=PSMC3 PE=1 SV=3
P63104	66	23	17	Carbamidomethylation; Oxidation (M); Acetylation (Protein N-term)	10746000	11955000	4059100	27745	14-3-3 protein zeta/delta OS=Homo sapiens OX=9606 GN=YWHAZ PE=1 SV=1
Q7KZ85	28	32	32	Carbamidomethylation	4687400	2607800	1794100	199071	Transcription elongation factor SPT6 OS=Homo sapiens OX=9606 GN=SUPT6H PE=1 SV=2
O75083	60	22	22	Carbamidomethylation; Oxidation (M)	4411700	3362100	1158000	66194	WD repeat-containing protein 1 OS=Homo sapiens OX=9606 GN=WDR1 PE=1 SV=4
Q03701	31	27	27	Acetylation (Protein N-term)	1549000	1236000	1248000	120974	CCAAT/enhancer-binding protein zeta OS=Homo sapiens OX=9606 GN=CEBPZ PE=1 SV=3
Q99460	43	25	25	Carbamidomethylation	1990100	660060	3491100	105836	26S proteasome non-ATPase regulatory subunit 1 OS=Homo sapiens OX=9606 GN=PSMD1 PE=1 SV=2
Q13162	70	19	16	Carbamidomethylation	2600800	1957900	3504000	30540	Peroxiredoxin-4 OS=Homo sapiens OX=9606 GN=PRDX4 PE=1 SV=1
P67936	75	27	15	Carbamidomethylation; Acetylation (Protein N-term)	6725600	2486800	580060	28522	Tropomyosin alpha-4 chain OS=Homo sapiens OX=9606 GN=TPM4 PE=1 SV=3
P25787	64	12	12	Carbamidomethylation; Oxidation (M)	6686200	1422500	1404000	25899	Proteasome subunit alpha type-2 OS=Homo sapiens OX=9606 GN=PSMA2 PE=1 SV=2
P12277	74	19	19	Carbamidomethylation; Oxidation (M)	11783000	4789600	3644000	42644	Creatine kinase B-type OS=Homo sapiens OX=9606 GN=CKB PE=1 SV=1
P54819	72	16	15	Carbamidomethylation; Oxidation (M); Acetylation (Protein N-term)	5126800	2239700	1376400	26478	Adenylate kinase 2 mitochondrial OS=Homo sapiens OX=9606 GN=AK2 PE=1 SV=2
P13797	52	30	30	Carbamidomethylation; Oxidation (M); Acetylation (Protein N-term)	4150600	4144300	5413600	70811	Plastin-3 OS=Homo sapiens OX=9606 GN=PLS3 PE=1 SV=4
Q14692	28	28	28		3968800	1913100	900700	145807	Ribosome biogenesis protein BMS1 homolog OS=Homo sapiens OX=9606 GN=BMS1 PE=1 SV=1
Q99623	65	20	20	Oxidation (M)	5940500	3425000	2473200	33296	Prohibitin-2 OS=Homo sapiens OX=9606 GN=PHB2 PE=1 SV=2
P62263	47	14	14	Carbamidomethylation; Oxidation (M)	447280	3740700	1507100	16273	40S ribosomal protein S14 OS=Homo sapiens OX=9606 GN=RPS14 PE=1 SV=3
Q14978	42	29	29		595030	1817800	1197700	73603	Nucleolar and coiled-body phosphoprotein 1 OS=Homo sapiens OX=9606 GN=NOLC1 PE=1 SV=2
Q9Y230	75	27	27	Carbamidomethylation; Oxidation (M)	4106100	6981000	1888000	51157	RuvB-like 2 OS=Homo sapiens OX=9606 GN=RUVBL2 PE=1 SV=3
P05387	97	17	16	Oxidation (M)	13312000	11909000	26946000	11665	60S acidic ribosomal protein P2 OS=Homo sapiens OX=9606 GN=RPLP2 PE=1 SV=1
Q9P2J5	36	32	32	Carbamidomethylation	7922700	3349000	2461200	134466	Leucine--tRNA ligase cytoplasmic OS=Homo sapiens OX=9606 GN=LARS1 PE=1 SV=2
Q15366	69	16	11	Carbamidomethylation; Oxidation (M); Acetylation (Protein N-term)	4327500	1900900	8196600	38580	Poly(rC)-binding protein 2 OS=Homo sapiens OX=9606 GN=PCBP2 PE=1 SV=1
P62826	61	16	16	Carbamidomethylation; Acetylation (Protein N-term)	3672200	7629200	13957000	24423	GTP-binding nuclear protein Ran OS=Homo sapiens OX=9606 GN=RAN PE=1 SV=3
P22695	62	19	19	Carbamidomethylation	3087200	2175200	1445300	48443	Cytochrome b-c1 complex subunit 2 mitochondrial OS=Homo sapiens OX=9606 GN=UQCRC2 PE=1 SV=3
P16989	72	18	12	Oxidation (M); Acetylation (Protein N-term)	935510	781540	233340	40090	Y-box-binding protein 3 OS=Homo sapiens OX=9606 GN=YBX3 PE=1 SV=4
O00148	59	22	10	Carbamidomethylation; Acetylation (Protein N-term)	509060	112980	516740	49130	ATP-dependent RNA helicase DDX39A OS=Homo sapiens OX=9606 GN=DDX39A PE=1 SV=2
Q6PKG0	34	25	24	Acetylation (Protein N-term)	3643400	2206100	18290000	123510	La-related protein 1 OS=Homo sapiens OX=9606 GN=LARP1 PE=1 SV=2
P54886	47	29	29	Carbamidomethylation; Oxidation (M)	6483500	4708800	6057900	87302	Delta-1-pyrroline-5-carboxylate synthase OS=Homo sapiens OX=9606 GN=ALDH18A1 PE=1 SV=2
P07737	95	14	14	Carbamidomethylation; Oxidation (M); Acetylation (Protein N-term)	55078000	49334000	14377000	15054	Profilin-1 OS=Homo sapiens OX=9606 GN=PFN1 PE=1 SV=2
P23588	35	19	19		187320	1445000	728670	69151	Eukaryotic translation initiation factor 4B OS=Homo sapiens OX=9606 GN=EIF4B PE=1 SV=2
Q01518	49	23	23	Carbamidomethylation; Oxidation (M); Acetylation (Protein N-term)	4252400	2266600	3372300	51902	Adenylyl cyclase-associated protein 1 OS=Homo sapiens OX=9606 GN=CAP1 PE=1 SV=5
Q9NYU2	25	23	23	Oxidation (M)	1065600	1498700	717190	177189	UDP-glucose:glycoprotein glucosyltransferase 1 OS=Homo sapiens OX=9606 GN=UGGT1 PE=1 SV=3
Q9NVI7	44	25	12		4011700	1147700	987740	71369	ATPase family AAA domain-containing protein 3A OS=Homo sapiens OX=9606 GN=ATAD3A PE=1 SV=2
Q15019	65	16	14	Carbamidomethylation; Oxidation (M)	5500100	1164500	915970	41487	Septin-2 OS=Homo sapiens OX=9606 GN=SEPTIN2 PE=1 SV=1
P05198	68	22	22	Carbamidomethylation; Oxidation (M)	1604400	2216900	1435700	36112	Eukaryotic translation initiation factor 2 subunit 1 OS=Homo sapiens OX=9606 GN=EIF2S1 PE=1 SV=3
Q9Y262	40	17	17	Carbamidomethylation; Oxidation (M)	5022900	3058000	2672500	66727	Eukaryotic translation initiation factor 3 subunit L OS=Homo sapiens OX=9606 GN=EIF3L PE=1 SV=1
P07910	66	29	27	Carbamidomethylation; Oxidation (M); Acetylation (Protein N-term)	5768300	9875400	7504700	33670	Heterogeneous nuclear ribonucleoproteins C1/C2 OS=Homo sapiens OX=9606 GN=HNRNPC PE=1 SV=4
P52895	70	19	4	Carbamidomethylation; Oxidation (M)	6018600	2586600	935760	36735	Aldo-keto reductase family 1 member C2 OS=Homo sapiens OX=9606 GN=AKR1C2 PE=1 SV=3
Q9UJZ1	65	15	15	Carbamidomethylation; Oxidation (M)	3441800	2276700	879570	38534	Stomatin-like protein 2 mitochondrial OS=Homo sapiens OX=9606 GN=STOML2 PE=1 SV=1
P11177	65	17	17	Carbamidomethylation; Oxidation (M)	4322800	2862600	1829100	39233	Pyruvate dehydrogenase E1 component subunit beta mitochondrial OS=Homo sapiens OX=9606 GN=PDHB PE=1 SV=3
P13647	39	26	12	Carbamidomethylation	547260	2256500	1462800	62378	Keratin type II cytoskeletal 5 OS=Homo sapiens OX=9606 GN=KRT5 PE=1 SV=3
P46060	56	23	23	Carbamidomethylation	1189500	2054400	4558200	63542	Ran GTPase-activating protein 1 OS=Homo sapiens OX=9606 GN=RANGAP1 PE=1 SV=1
P55795	43	13	9	Carbamidomethylation; Oxidation (M); Acetylation (Protein N-term)	1170300	1050900	440100	49264	Heterogeneous nuclear ribonucleoprotein H2 OS=Homo sapiens OX=9606 GN=HNRNPH2 PE=1 SV=1
P62753	41	18	18	Carbamidomethylation; Oxidation (M)	2672500	5327600	4019500	28681	40S ribosomal protein S6 OS=Homo sapiens OX=9606 GN=RPS6 PE=1 SV=1
P11387	40	33	33	Carbamidomethylation; Acetylation (Protein N-term)	3464200	9958400	10098000	90726	DNA topoisomerase 1 OS=Homo sapiens OX=9606 GN=TOP1 PE=1 SV=2
Q13724	29	16	16		483730	1701800	2755600	91918	Mannosyl-oligosaccharide glucosidase OS=Homo sapiens OX=9606 GN=MOGS PE=1 SV=5
O95373	20	18	17	Carbamidomethylation; Oxidation (M); Acetylation (Protein N-term)	1823800	592350	5626300	119516	Importin-7 OS=Homo sapiens OX=9606 GN=IPO7 PE=1 SV=1
Q2NL82	38	26	26	Acetylation (Protein N-term)	4750100	1623000	2794100	91810	Pre-rRNA-processing protein TSR1 homolog OS=Homo sapiens OX=9606 GN=TSR1 PE=1 SV=1
P35637	25	14	12	Carbamidomethylation; Oxidation (M)	2681200	2968400	1733800	53426	RNA-binding protein FUS OS=Homo sapiens OX=9606 GN=FUS PE=1 SV=1
Q92900	38	31	31		2895000	2663000	12495000	124345	Regulator of nonsense transcripts 1 OS=Homo sapiens OX=9606 GN=UPF1 PE=1 SV=2
P51114	47	21	19		880010	1873400	403760	69721	Fragile X mental retardation syndrome-related protein 1 OS=Homo sapiens OX=9606 GN=FXR1 PE=1 SV=3
Q12965	30	25	25	Carbamidomethylation	1913600	1615100	1065800	127062	Unconventional myosin-Ie OS=Homo sapiens OX=9606 GN=MYO1E PE=1 SV=2
Q9UMS4	81	21	21	Carbamidomethylation; Acetylation (Protein N-term)	4316200	3159300	7164900	55181	Pre-mRNA-processing factor 19 OS=Homo sapiens OX=9606 GN=PRPF19 PE=1 SV=1
P31946	55	18	10	Oxidation (M); Acetylation (Protein N-term)	993630	2416300	658160	28082	14-3-3 protein beta/alpha OS=Homo sapiens OX=9606 GN=YWHAB PE=1 SV=3
Q13011	73	18	18	Carbamidomethylation	1689700	2471400	1009700	35816	Delta(3 5)-Delta(2 4)-dienoyl-CoA isomerase mitochondrial OS=Homo sapiens OX=9606 GN=ECH1 PE=1 SV=2
Q15397	35	21	20		776480	3601400	1502300	73584	Pumilio homolog 3 OS=Homo sapiens OX=9606 GN=PUM3 PE=1 SV=3
P18124	59	29	29	Carbamidomethylation	1454700	10841000	5371100	29226	60S ribosomal protein L7 OS=Homo sapiens OX=9606 GN=RPL7 PE=1 SV=1
Q02880	25	36	18	Carbamidomethylation	1628100	2074000	2682200	183266	DNA topoisomerase 2-beta OS=Homo sapiens OX=9606 GN=TOP2B PE=1 SV=3
P53999	68	14	14		2287100	3951900	1977000	14395	Activated RNA polymerase II transcriptional coactivator p15 OS=Homo sapiens OX=9606 GN=SUB1 PE=1 SV=3
P31942	58	12	12	Oxidation (M)	2596900	1723100	1588100	36926	Heterogeneous nuclear ribonucleoprotein H3 OS=Homo sapiens OX=9606 GN=HNRNPH3 PE=1 SV=2
P62750	55	22	22		2283100	7104800	2547400	17695	60S ribosomal protein L23a OS=Homo sapiens OX=9606 GN=RPL23A PE=1 SV=1
P08754	49	14	9	Carbamidomethylation	311180	95787	278050	40532	Guanine nucleotide-binding protein G(i) subunit alpha-3 OS=Homo sapiens OX=9606 GN=GNAI3 PE=1 SV=3
P43490	65	20	20	Carbamidomethylation; Oxidation (M); Acetylation (Protein N-term)	3867300	2671200	807910	55521	Nicotinamide phosphoribosyltransferase OS=Homo sapiens OX=9606 GN=NAMPT PE=1 SV=1
P30044	66	13	13	Carbamidomethylation; Oxidation (M)	18828000	8349500	3504600	22086	Peroxiredoxin-5 mitochondrial OS=Homo sapiens OX=9606 GN=PRDX5 PE=1 SV=4
Q02218	39	23	23	Carbamidomethylation	11284000	780120	1183800	115935	2-oxoglutarate dehydrogenase mitochondrial OS=Homo sapiens OX=9606 GN=OGDH PE=1 SV=3
P28066	65	11	10	Carbamidomethylation; Oxidation (M)	3756800	7249200	1815100	26411	Proteasome subunit alpha type-5 OS=Homo sapiens OX=9606 GN=PSMA5 PE=1 SV=3
P15880	56	19	19	Carbamidomethylation	2831500	4622300	3973000	31324	40S ribosomal protein S2 OS=Homo sapiens OX=9606 GN=RPS2 PE=1 SV=2
Q14566	48	32	32	Carbamidomethylation; Oxidation (M); Acetylation (Protein N-term)	2583700	2499500	3059200	92889	DNA replication licensing factor MCM6 OS=Homo sapiens OX=9606 GN=MCM6 PE=1 SV=1
P38117	60	14	14	Carbamidomethylation; Oxidation (M)	561920	3840200	620610	27844	Electron transfer flavoprotein subunit beta OS=Homo sapiens OX=9606 GN=ETFB PE=1 SV=3
P23634	21	21	12		1777500	594120	205640	137920	Plasma membrane calcium-transporting ATPase 4 OS=Homo sapiens OX=9606 GN=ATP2B4 PE=1 SV=2
Q99878	51	22	4		2111900	8408300	2105400	13936	Histone H2A type 1-J OS=Homo sapiens OX=9606 GN=H2AC14 PE=1 SV=3
Q96KK5	51	22	4		2111900	8408300	2105400	13906	Histone H2A type 1-H OS=Homo sapiens OX=9606 GN=H2AC12 PE=1 SV=3
Q6FI13	50	22	4		2111900	8408300	2105400	14095	Histone H2A type 2-A OS=Homo sapiens OX=9606 GN=H2AC18 PE=1 SV=3
P0C0S8	50	22	4		2111900	8408300	2105400	14091	Histone H2A type 1 OS=Homo sapiens OX=9606 GN=H2AC11 PE=1 SV=2
P20671	50	22	4		2111900	8408300	2105400	14107	Histone H2A type 1-D OS=Homo sapiens OX=9606 GN=H2AC7 PE=1 SV=2
Q16777	50	22	4		2111900	8408300	2105400	13988	Histone H2A type 2-C OS=Homo sapiens OX=9606 GN=H2AC20 PE=1 SV=4
Q9BTM1	50	22	4		2111900	8408300	2105400	14019	Histone H2A.J OS=Homo sapiens OX=9606 GN=H2AJ PE=1 SV=1
P43304	47	24	24	Carbamidomethylation	1973200	2341200	4852200	80853	Glycerol-3-phosphate dehydrogenase mitochondrial OS=Homo sapiens OX=9606 GN=GPD2 PE=1 SV=3
P24752	58	20	20	Carbamidomethylation	1937500	1457400	6093800	45200	Acetyl-CoA acetyltransferase mitochondrial OS=Homo sapiens OX=9606 GN=ACAT1 PE=1 SV=1
P62277	56	22	21		3560500	3553000	6598800	17222	40S ribosomal protein S13 OS=Homo sapiens OX=9606 GN=RPS13 PE=1 SV=2
Q99613	26	18	18	Carbamidomethylation; Oxidation (M)	442990	2261400	623640	105344	Eukaryotic translation initiation factor 3 subunit C OS=Homo sapiens OX=9606 GN=EIF3C PE=1 SV=1
P62906	52	19	19	Carbamidomethylation; Oxidation (M)	5573800	4389000	5221100	24831	60S ribosomal protein L10a OS=Homo sapiens OX=9606 GN=RPL10A PE=1 SV=2
P39748	53	14	14	Carbamidomethylation; Oxidation (M)	2850000	1712900	1699700	42593	Flap endonuclease 1 OS=Homo sapiens OX=9606 GN=FEN1 PE=1 SV=1
P46087	37	27	27	Oxidation (M)	4170700	4234500	1345500	89302	Probable 28S rRNA (cytosine(4447)-C(5))-methyltransferase OS=Homo sapiens OX=9606 GN=NOP2 PE=1 SV=2
P05455	50	21	21	Carbamidomethylation; Oxidation (M)	3944800	1502700	2576300	46837	Lupus La protein OS=Homo sapiens OX=9606 GN=SSB PE=1 SV=2
Q6DD88	52	19	18	Oxidation (M)	1478100	689880	2280700	60542	Atlastin-3 OS=Homo sapiens OX=9606 GN=ATL3 PE=1 SV=1
P61313	47	16	16		325270	2361100	2561800	24146	60S ribosomal protein L15 OS=Homo sapiens OX=9606 GN=RPL15 PE=1 SV=2
P18754	64	15	15	Carbamidomethylation; Oxidation (M)	1911100	1066400	4350500	44969	Regulator of chromosome condensation OS=Homo sapiens OX=9606 GN=RCC1 PE=1 SV=1
Q13423	29	23	23	Carbamidomethylation	2092200	2814300	1374000	113895	NAD(P) transhydrogenase mitochondrial OS=Homo sapiens OX=9606 GN=NNT PE=1 SV=3
P06899	70	20	3	Oxidation (M)	391570	5882400	2663000	13904	Histone H2B type 1-J OS=Homo sapiens OX=9606 GN=H2BC11 PE=1 SV=3
Q8WWI1	20	22	22	Carbamidomethylation	753510	1135000	634610	192694	LIM domain only protein 7 OS=Homo sapiens OX=9606 GN=LMO7 PE=1 SV=3
O95831	47	21	21	Carbamidomethylation	1336900	1473700	926980	66901	Apoptosis-inducing factor 1 mitochondrial OS=Homo sapiens OX=9606 GN=AIFM1 PE=1 SV=1
Q9NU22	9	30	30	Acetylation (Protein N-term)	1608100	755370	1492500	632827	Midasin OS=Homo sapiens OX=9606 GN=MDN1 PE=1 SV=2
P35998	55	20	20	Carbamidomethylation; Oxidation (M)	1378900	954000	2904000	48634	26S proteasome regulatory subunit 7 OS=Homo sapiens OX=9606 GN=PSMC2 PE=1 SV=3
Q9UQE7	25	23	23		2679100	7306300	2734000	141541	Structural maintenance of chromosomes protein 3 OS=Homo sapiens OX=9606 GN=SMC3 PE=1 SV=2
P02768	16	18	18	Carbamidomethylation	66947000	770080000	72834000	69367	Albumin OS=Homo sapiens OX=9606 GN=ALB PE=1 SV=2
P78347	36	24	24	Carbamidomethylation; Acetylation (Protein N-term)	2117400	1481400	1376700	112416	General transcription factor II-I OS=Homo sapiens OX=9606 GN=GTF2I PE=1 SV=2
Q14444	38	21	21	Carbamidomethylation	1719400	2184800	1159900	78366	Caprin-1 OS=Homo sapiens OX=9606 GN=CAPRIN1 PE=1 SV=2
Q07021	49	12	12	Carbamidomethylation; Oxidation (M)	14494000	3426300	1846400	31362	Complement component 1 Q subcomponent-binding protein mitochondrial OS=Homo sapiens OX=9606 GN=C1QBP PE=1 SV=1
Q9UN86	38	18	15	Carbamidomethylation; Acetylation (Protein N-term)	2398000	1676200	842560	54121	Ras GTPase-activating protein-binding protein 2 OS=Homo sapiens OX=9606 GN=G3BP2 PE=1 SV=2
P62241	60	19	19	Carbamidomethylation	665520	4349300	2872000	24205	40S ribosomal protein S8 OS=Homo sapiens OX=9606 GN=RPS8 PE=1 SV=2
P61158	61	17	17	Carbamidomethylation	3971900	2032100	1936200	47371	Actin-related protein 3 OS=Homo sapiens OX=9606 GN=ACTR3 PE=1 SV=3
Q9P0L0	51	14	13	Oxidation (M); Acetylation (Protein N-term)	839610	1248900	758560	27893	Vesicle-associated membrane protein-associated protein A OS=Homo sapiens OX=9606 GN=VAPA PE=1 SV=3
P13489	57	16	16	Carbamidomethylation; Acetylation (Protein N-term)	1641500	923640	2315700	49974	Ribonuclease inhibitor OS=Homo sapiens OX=9606 GN=RNH1 PE=1 SV=2
P46777	46	19	19	Carbamidomethylation; Oxidation (M)	885300	5591900	3915900	34363	60S ribosomal protein L5 OS=Homo sapiens OX=9606 GN=RPL5 PE=1 SV=3
P62424	46	20	20	Carbamidomethylation	2640000	7036900	4878500	29996	60S ribosomal protein L7a OS=Homo sapiens OX=9606 GN=RPL7A PE=1 SV=2
P12429	57	19	19	Carbamidomethylation; Acetylation (Protein N-term)	4862400	5976800	1440500	36375	Annexin A3 OS=Homo sapiens OX=9606 GN=ANXA3 PE=1 SV=3
P30084	59	16	16	Carbamidomethylation	7842800	2364700	1958600	31387	Enoyl-CoA hydratase mitochondrial OS=Homo sapiens OX=9606 GN=ECHS1 PE=1 SV=4
P62829	71	14	14	Carbamidomethylation; Oxidation (M)	2502900	1638500	3003900	14865	60S ribosomal protein L23 OS=Homo sapiens OX=9606 GN=RPL23 PE=1 SV=1
Q02952	14	15	15	Carbamidomethylation	1422400	656400	804120	191480	A-kinase anchor protein 12 OS=Homo sapiens OX=9606 GN=AKAP12 PE=1 SV=4
O00159	31	24	23	Carbamidomethylation	2028600	778530	953280	121682	Unconventional myosin-Ic OS=Homo sapiens OX=9606 GN=MYO1C PE=1 SV=4
P04908	50	22	4		229350	1344600	860330	14135	Histone H2A type 1-B/E OS=Homo sapiens OX=9606 GN=H2AC4 PE=1 SV=2
Q7L7L0	50	22	4		229350	1344600	860330	14121	Histone H2A type 3 OS=Homo sapiens OX=9606 GN=H2AW PE=1 SV=3
Q93077	50	22	4		229350	1344600	860330	14105	Histone H2A type 1-C OS=Homo sapiens OX=9606 GN=H2AC6 PE=1 SV=3
Q9UL46	65	12	12	Carbamidomethylation; Acetylation (Protein N-term)	1394000	864710	1714200	27402	Proteasome activator complex subunit 2 OS=Homo sapiens OX=9606 GN=PSME2 PE=1 SV=4
P43686	56	20	19	Carbamidomethylation; Oxidation (M); Acetylation (Protein N-term)	1132300	895950	1485300	47366	26S proteasome regulatory subunit 6B OS=Homo sapiens OX=9606 GN=PSMC4 PE=1 SV=2
P01889	36	11	5	Carbamidomethylation	533480	1443400	184120	40460	HLA class I histocompatibility antigen B alpha chain OS=Homo sapiens OX=9606 GN=HLA-B PE=1 SV=3
Q16555	53	20	17	Carbamidomethylation	1561800	2495500	1557900	62294	Dihydropyrimidinase-related protein 2 OS=Homo sapiens OX=9606 GN=DPYSL2 PE=1 SV=1
P46782	55	16	16	Carbamidomethylation; Oxidation (M); Acetylation (Protein N-term)	6002500	3396700	4256100	22876	40S ribosomal protein S5 OS=Homo sapiens OX=9606 GN=RPS5 PE=1 SV=4
P18621	55	15	15	Carbamidomethylation	5526900	3609100	4503400	21397	60S ribosomal protein L17 OS=Homo sapiens OX=9606 GN=RPL17 PE=1 SV=3
P00387	61	16	16	Oxidation (M)	1834800	1089400	2206400	34235	NADH-cytochrome b5 reductase 3 OS=Homo sapiens OX=9606 GN=CYB5R3 PE=1 SV=3
P09429	53	15	13	Carbamidomethylation; Oxidation (M)	1902000	5734200	16426000	24894	High mobility group protein B1 OS=Homo sapiens OX=9606 GN=HMGB1 PE=1 SV=3
P16152	73	16	13	Carbamidomethylation; Acetylation (Protein N-term)	4763400	2207100	2171200	30375	Carbonyl reductase [NADPH] 1 OS=Homo sapiens OX=9606 GN=CBR1 PE=1 SV=3
P09960	45	21	21	Carbamidomethylation	10185000	1939700	1688200	69285	Leukotriene A-4 hydrolase OS=Homo sapiens OX=9606 GN=LTA4H PE=1 SV=2
P23921	42	19	19	Carbamidomethylation	1422800	959580	2319600	90070	Ribonucleoside-diphosphate reductase large subunit OS=Homo sapiens OX=9606 GN=RRM1 PE=1 SV=1
P09382	96	12	12	Carbamidomethylation; Oxidation (M); Acetylation (Protein N-term)	14356000	13848000	4711300	14716	Galectin-1 OS=Homo sapiens OX=9606 GN=LGALS1 PE=1 SV=2
Q5T4S7	5	19	19	Carbamidomethylation	1828900	321410	773310	573849	E3 ubiquitin-protein ligase UBR4 OS=Homo sapiens OX=9606 GN=UBR4 PE=1 SV=1
Q96I24	56	21	18	Carbamidomethylation; Acetylation (Protein N-term)	3658000	2042400	945320	61640	Far upstream element-binding protein 3 OS=Homo sapiens OX=9606 GN=FUBP3 PE=1 SV=2
Q13151	50	11	11	Carbamidomethylation	2048200	1017800	1174900	30841	Heterogeneous nuclear ribonucleoprotein A0 OS=Homo sapiens OX=9606 GN=HNRNPA0 PE=1 SV=1
P61163	51	14	7	Carbamidomethylation; Acetylation (Protein N-term)	1827000	375530	809560	42614	Alpha-centractin OS=Homo sapiens OX=9606 GN=ACTR1A PE=1 SV=1
Q9Y224	62	14	14	Oxidation (M)	2625600	822990	2240100	28068	RNA transcription translation and transport factor protein OS=Homo sapiens OX=9606 GN=RTRAF PE=1 SV=1
Q07020	46	16	16	Carbamidomethylation	468230	5339600	4300000	21634	60S ribosomal protein L18 OS=Homo sapiens OX=9606 GN=RPL18 PE=1 SV=2
P37802	87	16	16	Carbamidomethylation; Oxidation (M); Acetylation (Protein N-term)	12783000	15318000	9724700	22391	Transgelin-2 OS=Homo sapiens OX=9606 GN=TAGLN2 PE=1 SV=3
P41091	57	21	3	Carbamidomethylation; Acetylation (Protein N-term)	47575	655470	776860	51110	Eukaryotic translation initiation factor 2 subunit 3 OS=Homo sapiens OX=9606 GN=EIF2S3 PE=1 SV=3
P45974	36	22	22	Carbamidomethylation; Acetylation (Protein N-term)	1405300	834990	490580	95786	Ubiquitin carboxyl-terminal hydrolase 5 OS=Homo sapiens OX=9606 GN=USP5 PE=1 SV=2
P17655	47	21	21	Carbamidomethylation	1602600	743370	1344700	79995	Calpain-2 catalytic subunit OS=Homo sapiens OX=9606 GN=CAPN2 PE=1 SV=6
P51149	82	16	16	Carbamidomethylation	4367300	2673800	2440100	23490	Ras-related protein Rab-7a OS=Homo sapiens OX=9606 GN=RAB7A PE=1 SV=1
Q9BVI4	53	18	18	Acetylation (Protein N-term)	1499700	3463000	3439600	58468	Nucleolar complex protein 4 homolog OS=Homo sapiens OX=9606 GN=NOC4L PE=1 SV=1
O75955	56	18	18		3547500	4399800	6933500	47355	Flotillin-1 OS=Homo sapiens OX=9606 GN=FLOT1 PE=1 SV=3
Q15436	24	12	10	Carbamidomethylation; Oxidation (M); Acetylation (Protein N-term)	653360	259530	209200	86161	Protein transport protein Sec23A OS=Homo sapiens OX=9606 GN=SEC23A PE=1 SV=2
P62244	68	12	12	Carbamidomethylation; Oxidation (M)	1655600	2220700	2267800	14840	40S ribosomal protein S15a OS=Homo sapiens OX=9606 GN=RPS15A PE=1 SV=2
Q15717	58	17	17		906950	910100	2221200	36092	ELAV-like protein 1 OS=Homo sapiens OX=9606 GN=ELAVL1 PE=1 SV=2
P50402	54	12	12	Oxidation (M); Acetylation (Protein N-term)	451080	1510900	527060	28994	Emerin OS=Homo sapiens OX=9606 GN=EMD PE=1 SV=1
P62917	64	19	19	Carbamidomethylation; Oxidation (M)	983510	3784400	9591200	28025	60S ribosomal protein L8 OS=Homo sapiens OX=9606 GN=RPL8 PE=1 SV=2
Q9NQC3	12	8	8	Carbamidomethylation; Oxidation (M); Acetylation (Protein N-term)	3106700	1364400	859490	129931	Reticulon-4 OS=Homo sapiens OX=9606 GN=RTN4 PE=1 SV=2
P06753	47	16	6	Oxidation (M)	481550	1515500	609800	32950	Tropomyosin alpha-3 chain OS=Homo sapiens OX=9606 GN=TPM3 PE=1 SV=2
P35237	53	16	15	Carbamidomethylation; Oxidation (M)	4630900	1379100	1350100	42622	Serpin B6 OS=Homo sapiens OX=9606 GN=SERPINB6 PE=1 SV=3
Q15050	47	21	21	Carbamidomethylation; Acetylation (Protein N-term)	1422600	3365600	1493100	41193	Ribosome biogenesis regulatory protein homolog OS=Homo sapiens OX=9606 GN=RRS1 PE=1 SV=2
Q6NUK1	49	21	21	Oxidation (M)	959580	3033400	1297000	53354	Calcium-binding mitochondrial carrier protein SCaMC-1 OS=Homo sapiens OX=9606 GN=SLC25A24 PE=1 SV=2
Q8TCS8	40	26	26		609830	721300	1634200	85951	Polyribonucleotide nucleotidyltransferase 1 mitochondrial OS=Homo sapiens OX=9606 GN=PNPT1 PE=1 SV=2
Q9NTK5	54	14	14	Carbamidomethylation	660500	797930	1936800	44744	Obg-like ATPase 1 OS=Homo sapiens OX=9606 GN=OLA1 PE=1 SV=2
P20042	48	19	19	Carbamidomethylation	982100	3000600	1829300	38388	Eukaryotic translation initiation factor 2 subunit 2 OS=Homo sapiens OX=9606 GN=EIF2S2 PE=1 SV=2
Q9Y3I0	52	22	22		6871700	2144700	1345700	55210	RNA-splicing ligase RtcB homolog OS=Homo sapiens OX=9606 GN=RTCB PE=1 SV=1
P45880	61	16	16	Carbamidomethylation	3861100	3702900	6294100	31567	Voltage-dependent anion-selective channel protein 2 OS=Homo sapiens OX=9606 GN=VDAC2 PE=1 SV=2
O75390	61	22	22	Carbamidomethylation; Oxidation (M)	2816700	3347700	8776000	51712	Citrate synthase mitochondrial OS=Homo sapiens OX=9606 GN=CS PE=1 SV=2
Q86YZ3	5	7	7		24317	431630	78038	282389	Hornerin OS=Homo sapiens OX=9606 GN=HRNR PE=1 SV=2
P06493	65	18	16		2385800	2604200	1575700	34095	Cyclin-dependent kinase 1 OS=Homo sapiens OX=9606 GN=CDK1 PE=1 SV=3
Q15637	34	14	14	Carbamidomethylation; Oxidation (M); Acetylation (Protein N-term)	2437300	1021500	693450	68330	Splicing factor 1 OS=Homo sapiens OX=9606 GN=SF1 PE=1 SV=4
Q96AG4	49	18	18	Carbamidomethylation	3222300	1340000	6878600	34930	Leucine-rich repeat-containing protein 59 OS=Homo sapiens OX=9606 GN=LRRC59 PE=1 SV=1
O60313	26	20	20	Carbamidomethylation	2827900	2884300	1651700	111630	Dynamin-like 120 kDa protein mitochondrial OS=Homo sapiens OX=9606 GN=OPA1 PE=1 SV=3
O94906	34	30	30	Carbamidomethylation	338630	1900400	1533800	106925	Pre-mRNA-processing factor 6 OS=Homo sapiens OX=9606 GN=PRPF6 PE=1 SV=1
Q14683	30	31	31		7810800	5004500	2968100	143233	Structural maintenance of chromosomes protein 1A OS=Homo sapiens OX=9606 GN=SMC1A PE=1 SV=2
Q9BSJ8	29	22	22	Carbamidomethylation; Oxidation (M)	1167000	838060	2286000	122856	Extended synaptotagmin-1 OS=Homo sapiens OX=9606 GN=ESYT1 PE=1 SV=1
Q9NW13	25	19	19		222100	1834600	2415100	85738	RNA-binding protein 28 OS=Homo sapiens OX=9606 GN=RBM28 PE=1 SV=3
Q9NSE4	30	22	22	Carbamidomethylation	1309900	1368200	1041500	113791	Isoleucine--tRNA ligase mitochondrial OS=Homo sapiens OX=9606 GN=IARS2 PE=1 SV=2
Q99459	47	26	26		2925900	1942200	1050500	92251	Cell division cycle 5-like protein OS=Homo sapiens OX=9606 GN=CDC5L PE=1 SV=2
P61160	41	13	13	Carbamidomethylation; Oxidation (M)	1188900	922440	1154700	44761	Actin-related protein 2 OS=Homo sapiens OX=9606 GN=ACTR2 PE=1 SV=1
P52907	73	14	11	Carbamidomethylation; Acetylation (Protein N-term)	3489800	2295200	905210	32923	F-actin-capping protein subunit alpha-1 OS=Homo sapiens OX=9606 GN=CAPZA1 PE=1 SV=3
O75367	43	16	12		10028000	3165200	2321100	39617	Core histone macro-H2A.1 OS=Homo sapiens OX=9606 GN=MACROH2A1 PE=1 SV=4
Q06210	29	15	15	Carbamidomethylation	941070	251200	795400	78806	Glutamine--fructose-6-phosphate aminotransferase [isomerizing] 1 OS=Homo sapiens OX=9606 GN=GFPT1 PE=1 SV=3
Q99733	40	13	11	Carbamidomethylation; Oxidation (M); Acetylation (Protein N-term)	1473500	1096900	352070	42823	Nucleosome assembly protein 1-like 4 OS=Homo sapiens OX=9606 GN=NAP1L4 PE=1 SV=1
P55786	31	21	21		4153700	1812900	726880	103276	Puromycin-sensitive aminopeptidase OS=Homo sapiens OX=9606 GN=NPEPPS PE=1 SV=2
P32969	65	12	12	Carbamidomethylation	5124600	2263900	1936300	21863	60S ribosomal protein L9 OS=Homo sapiens OX=9606 GN=RPL9 PE=1 SV=1
P60228	45	17	17	Carbamidomethylation; Oxidation (M)	532090	839480	923650	52221	Eukaryotic translation initiation factor 3 subunit E OS=Homo sapiens OX=9606 GN=EIF3E PE=1 SV=1
P38159	54	25	25	Acetylation (Protein N-term)	433910	2792600	2012100	42332	RNA-binding motif protein X chromosome OS=Homo sapiens OX=9606 GN=RBMX PE=1 SV=3
Q8NCA5	31	9	6		222770	708350	1343500	55272	Protein FAM98A OS=Homo sapiens OX=9606 GN=FAM98A PE=1 SV=2
Q9H0U4	81	14	5	Oxidation (M); Acetylation (Protein N-term)	1240400	646440	473820	22171	Ras-related protein Rab-1B OS=Homo sapiens OX=9606 GN=RAB1B PE=1 SV=1
P23381	49	17	17	Carbamidomethylation; Oxidation (M)	2265100	769000	3394300	53165	Tryptophan--tRNA ligase cytoplasmic OS=Homo sapiens OX=9606 GN=WARS1 PE=1 SV=2
P27105	71	17	17	Carbamidomethylation; Oxidation (M)	1057400	1691600	941180	31731	Stomatin OS=Homo sapiens OX=9606 GN=STOM PE=1 SV=3
P21291	65	9	9	Carbamidomethylation	1676700	5099900	1497500	20567	Cysteine and glycine-rich protein 1 OS=Homo sapiens OX=9606 GN=CSRP1 PE=1 SV=3
P30837	32	14	13	Carbamidomethylation; Oxidation (M)	4100000	2090800	828930	57206	Aldehyde dehydrogenase X mitochondrial OS=Homo sapiens OX=9606 GN=ALDH1B1 PE=1 SV=3
O43169	65	10	10	Acetylation (Protein N-term)	3232500	833840	2058600	16695	Cytochrome b5 type B OS=Homo sapiens OX=9606 GN=CYB5B PE=1 SV=3
Q9BWF3	48	12	12		300180	710260	1067500	40314	RNA-binding protein 4 OS=Homo sapiens OX=9606 GN=RBM4 PE=1 SV=1
Q6UB35	29	17	17	Carbamidomethylation	774260	719870	1281800	105790	Monofunctional C1-tetrahydrofolate synthase mitochondrial OS=Homo sapiens OX=9606 GN=MTHFD1L PE=1 SV=1
O15372	57	14	14	Carbamidomethylation	1024900	1635900	3162300	39930	Eukaryotic translation initiation factor 3 subunit H OS=Homo sapiens OX=9606 GN=EIF3H PE=1 SV=1
Q8NBS9	43	17	16	Carbamidomethylation	3721100	1234200	4384600	47629	Thioredoxin domain-containing protein 5 OS=Homo sapiens OX=9606 GN=TXNDC5 PE=1 SV=2
Q8NBJ5	43	22	22	Carbamidomethylation	2579400	2267100	3583400	71636	Procollagen galactosyltransferase 1 OS=Homo sapiens OX=9606 GN=COLGALT1 PE=1 SV=1
P15328	50	10	10	Carbamidomethylation; Oxidation (M)	2643700	2341500	2726100	29819	Folate receptor alpha OS=Homo sapiens OX=9606 GN=FOLR1 PE=1 SV=3
P36957	38	15	15	Carbamidomethylation	1366000	1571400	653740	48755	Dihydrolipoyllysine-residue succinyltransferase component of 2-oxoglutarate dehydrogenase complex mitochondrial OS=Homo sapiens OX=9606 GN=DLST PE=1 SV=4
P08708	62	13	13	Carbamidomethylation; Oxidation (M)	11771000	3248800	3275500	15550	40S ribosomal protein S17 OS=Homo sapiens OX=9606 GN=RPS17 PE=1 SV=2
P20020	29	25	16	Carbamidomethylation; Oxidation (M)	15168000	6042100	4471900	134685	Plasma membrane calcium-transporting ATPase 1 OS=Homo sapiens OX=9606 GN=ATP2B1 PE=1 SV=4
P30050	64	9	9	Carbamidomethylation	3487600	3551000	3647700	17819	60S ribosomal protein L12 OS=Homo sapiens OX=9606 GN=RPL12 PE=1 SV=1
P04179	68	11	11		6886600	6718800	2176300	24750	Superoxide dismutase [Mn] mitochondrial OS=Homo sapiens OX=9606 GN=SOD2 PE=1 SV=3
P14314	40	18	18	Carbamidomethylation; Oxidation (M)	639300	2693100	1485600	59426	Glucosidase 2 subunit beta OS=Homo sapiens OX=9606 GN=PRKCSH PE=1 SV=2
Q9UG63	42	25	25		2786900	3573000	2060300	71290	ATP-binding cassette sub-family F member 2 OS=Homo sapiens OX=9606 GN=ABCF2 PE=1 SV=2
P60981	74	13	12	Carbamidomethylation; Acetylation (Protein N-term)	972340	3230300	1623900	18506	Destrin OS=Homo sapiens OX=9606 GN=DSTN PE=1 SV=3
Q86VP6	25	25	25	Carbamidomethylation; Oxidation (M); Acetylation (Protein N-term)	700310	1103400	1713500	136375	Cullin-associated NEDD8-dissociated protein 1 OS=Homo sapiens OX=9606 GN=CAND1 PE=1 SV=2
P00491	75	16	16	Carbamidomethylation; Acetylation (Protein N-term)	1031900	910870	2029700	32118	Purine nucleoside phosphorylase OS=Homo sapiens OX=9606 GN=PNP PE=1 SV=2
P62333	55	16	16	Carbamidomethylation; Oxidation (M)	2152900	918920	1372700	44173	26S proteasome regulatory subunit 10B OS=Homo sapiens OX=9606 GN=PSMC6 PE=1 SV=1
P49756	17	13	13		223900	1314400	899030	100186	RNA-binding protein 25 OS=Homo sapiens OX=9606 GN=RBM25 PE=1 SV=3
Q8TDN6	59	15	15		254020	1794500	1169300	41401	Ribosome biogenesis protein BRX1 homolog OS=Homo sapiens OX=9606 GN=BRIX1 PE=1 SV=2
P04040	47	16	16	Carbamidomethylation; Oxidation (M); Acetylation (Protein N-term)	1096400	1662400	340180	59756	Catalase OS=Homo sapiens OX=9606 GN=CAT PE=1 SV=3
Q6YN16	44	14	14	Carbamidomethylation; Oxidation (M)	2459100	578820	1628900	45395	Hydroxysteroid dehydrogenase-like protein 2 OS=Homo sapiens OX=9606 GN=HSDL2 PE=1 SV=1
Q13409	38	10	10	Carbamidomethylation	1073300	143140	1465600	71457	Cytoplasmic dynein 1 intermediate chain 2 OS=Homo sapiens OX=9606 GN=DYNC1I2 PE=1 SV=3
P39656	54	16	16		1964000	1551000	1285200	50801	Dolichyl-diphosphooligosaccharide--protein glycosyltransferase 48 kDa subunit OS=Homo sapiens OX=9606 GN=DDOST PE=1 SV=4
O00231	56	19	19	Acetylation (Protein N-term)	3512900	1648900	1784900	47464	26S proteasome non-ATPase regulatory subunit 11 OS=Homo sapiens OX=9606 GN=PSMD11 PE=1 SV=3
O75340	77	10	10	Carbamidomethylation; Acetylation (Protein N-term)	1862900	1805600	1194500	21868	Programmed cell death protein 6 OS=Homo sapiens OX=9606 GN=PDCD6 PE=1 SV=1
Q9BXP5	27	19	19	Carbamidomethylation	2570500	1970100	2278700	100667	Serrate RNA effector molecule homolog OS=Homo sapiens OX=9606 GN=SRRT PE=1 SV=1
P09525	47	14	13	Carbamidomethylation	896510	701470	1430100	35883	Annexin A4 OS=Homo sapiens OX=9606 GN=ANXA4 PE=1 SV=4
Q13895	44	16	16		3435100	1877600	18405000	49601	Bystin OS=Homo sapiens OX=9606 GN=BYSL PE=1 SV=3
P00966	53	20	20	Carbamidomethylation; Oxidation (M)	690180	2474300	7603400	46530	Argininosuccinate synthase OS=Homo sapiens OX=9606 GN=ASS1 PE=1 SV=2
P30040	62	15	15	Carbamidomethylation	3883300	3294400	1061000	28993	Endoplasmic reticulum resident protein 29 OS=Homo sapiens OX=9606 GN=ERP29 PE=1 SV=4
Q9UBQ7	50	11	11	Carbamidomethylation; Oxidation (M)	2769800	1274200	1273000	35668	Glyoxylate reductase/hydroxypyruvate reductase OS=Homo sapiens OX=9606 GN=GRHPR PE=1 SV=1
P49755	45	12	12	Carbamidomethylation; Oxidation (M)	1902500	2722000	1308300	24976	Transmembrane emp24 domain-containing protein 10 OS=Homo sapiens OX=9606 GN=TMED10 PE=1 SV=2
P40763	38	17	17	Carbamidomethylation; Acetylation (Protein N-term)	811920	451420	1116700	88068	Signal transducer and activator of transcription 3 OS=Homo sapiens OX=9606 GN=STAT3 PE=1 SV=2
Q8TDD1	28	16	15		188730	756270	1049800	98595	ATP-dependent RNA helicase DDX54 OS=Homo sapiens OX=9606 GN=DDX54 PE=1 SV=2
O94874	26	15	15		69499	1696800	459830	89595	E3 UFM1-protein ligase 1 OS=Homo sapiens OX=9606 GN=UFL1 PE=1 SV=2
Q12873	13	19	6	Carbamidomethylation	663850	836530	574300	226590	Chromodomain-helicase-DNA-binding protein 3 OS=Homo sapiens OX=9606 GN=CHD3 PE=1 SV=3
P30519	51	11	11	Acetylation (Protein N-term)	10913000	2338200	784670	36033	Heme oxygenase 2 OS=Homo sapiens OX=9606 GN=HMOX2 PE=1 SV=2
Q12874	41	14	14	Carbamidomethylation; Acetylation (Protein N-term)	1881400	705270	534320	58849	Splicing factor 3A subunit 3 OS=Homo sapiens OX=9606 GN=SF3A3 PE=1 SV=1
Q14126	26	14	14	Carbamidomethylation	380170	1176300	233480	122294	Desmoglein-2 OS=Homo sapiens OX=9606 GN=DSG2 PE=1 SV=2
P04899	51	14	7	Carbamidomethylation	483420	102030	547020	40451	Guanine nucleotide-binding protein G(i) subunit alpha-2 OS=Homo sapiens OX=9606 GN=GNAI2 PE=1 SV=3
O43615	36	17	17	Carbamidomethylation	493780	1173300	2131100	51356	Mitochondrial import inner membrane translocase subunit TIM44 OS=Homo sapiens OX=9606 GN=TIMM44 PE=1 SV=2
P21266	71	16	15	Carbamidomethylation; Acetylation (Protein N-term)	1338500	1326700	2085500	26560	Glutathione S-transferase Mu 3 OS=Homo sapiens OX=9606 GN=GSTM3 PE=1 SV=3
Q15758	29	11	11	Carbamidomethylation; Acetylation (Protein N-term)	1559500	628200	684780	56598	Neutral amino acid transporter B(0) OS=Homo sapiens OX=9606 GN=SLC1A5 PE=1 SV=2
P26196	43	12	12		907590	1083100	666140	54417	Probable ATP-dependent RNA helicase DDX6 OS=Homo sapiens OX=9606 GN=DDX6 PE=1 SV=2
P61586	61	13	5	Carbamidomethylation; Oxidation (M)	26228	1232700	328390	21768	Transforming protein RhoA OS=Homo sapiens OX=9606 GN=RHOA PE=1 SV=1
P28074	56	11	11	Carbamidomethylation	7821900	2615600	696360	28480	Proteasome subunit beta type-5 OS=Homo sapiens OX=9606 GN=PSMB5 PE=1 SV=3
Q16836	66	12	12	Oxidation (M)	1554100	1095400	1375600	34294	Hydroxyacyl-coenzyme A dehydrogenase mitochondrial OS=Homo sapiens OX=9606 GN=HADH PE=1 SV=3
Q96SI9	22	14	8		120720	1188200	1812900	73653	Spermatid perinuclear RNA-binding protein OS=Homo sapiens OX=9606 GN=STRBP PE=1 SV=1
Q7L1Q6	54	22	21	Carbamidomethylation; Oxidation (M)	832050	2618000	1047800	48043	Basic leucine zipper and W2 domain-containing protein 1 OS=Homo sapiens OX=9606 GN=BZW1 PE=1 SV=1
Q9UHX1	51	18	18	Oxidation (M); Acetylation (Protein N-term)	2882900	1429000	1823200	59876	Poly(U)-binding-splicing factor PUF60 OS=Homo sapiens OX=9606 GN=PUF60 PE=1 SV=1
P11310	47	18	18	Carbamidomethylation; Oxidation (M)	3745900	1754000	4032500	46588	Medium-chain specific acyl-CoA dehydrogenase mitochondrial OS=Homo sapiens OX=9606 GN=ACADM PE=1 SV=1
Q15046	36	19	19	Carbamidomethylation; Acetylation (Protein N-term)	757070	1086300	1040700	68048	Lysine--tRNA ligase OS=Homo sapiens OX=9606 GN=KARS1 PE=1 SV=3
Q00325	39	19	19	Carbamidomethylation	1211100	2663500	3384700	40095	Phosphate carrier protein mitochondrial OS=Homo sapiens OX=9606 GN=SLC25A3 PE=1 SV=2
P33316	47	11	11	Carbamidomethylation	3829600	3778600	1382100	26563	Deoxyuridine 5'-triphosphate nucleotidohydrolase mitochondrial OS=Homo sapiens OX=9606 GN=DUT PE=1 SV=4
Q29RF7	16	14	14		482910	171650	367000	150830	Sister chromatid cohesion protein PDS5 homolog A OS=Homo sapiens OX=9606 GN=PDS5A PE=1 SV=1
Q01105	52	17	17		4180500	7321100	4522400	33489	Protein SET OS=Homo sapiens OX=9606 GN=SET PE=1 SV=3
P10515	34	15	15	Carbamidomethylation	1019200	1217000	2368500	68997	Dihydrolipoyllysine-residue acetyltransferase component of pyruvate dehydrogenase complex mitochondrial OS=Homo sapiens OX=9606 GN=DLAT PE=1 SV=3
Q14684	34	16	16		199730	1688100	268340	84428	Ribosomal RNA processing protein 1 homolog B OS=Homo sapiens OX=9606 GN=RRP1B PE=1 SV=3
P50502	37	10	10	Carbamidomethylation	540350	2789700	728340	41332	Hsc70-interacting protein OS=Homo sapiens OX=9606 GN=ST13 PE=1 SV=2
O14979	40	17	15	Carbamidomethylation	1305400	1029800	1997600	46438	Heterogeneous nuclear ribonucleoprotein D-like OS=Homo sapiens OX=9606 GN=HNRNPDL PE=1 SV=3
P62979	65	12	3	Carbamidomethylation	23449	103670	416280	17965	Ubiquitin-40S ribosomal protein S27a OS=Homo sapiens OX=9606 GN=RPS27A PE=1 SV=2
P16070	11	9	9	Carbamidomethylation; Oxidation (M)	638710	2545100	844390	81538	CD44 antigen OS=Homo sapiens OX=9606 GN=CD44 PE=1 SV=3
Q96KR1	26	17	17		11053000	2852100	3317700	117012	Zinc finger RNA-binding protein OS=Homo sapiens OX=9606 GN=ZFR PE=1 SV=2
O00267	20	15	15		1469100	463510	750520	121000	Transcription elongation factor SPT5 OS=Homo sapiens OX=9606 GN=SUPT5H PE=1 SV=1
O95782	29	19	12	Carbamidomethylation	1735300	845000	709580	107546	AP-2 complex subunit alpha-1 OS=Homo sapiens OX=9606 GN=AP2A1 PE=1 SV=3
Q9NX58	39	14	14		90262	978830	742970	43615	Cell growth-regulating nucleolar protein OS=Homo sapiens OX=9606 GN=LYAR PE=1 SV=2
Q96T88	28	15	15		2965700	1473600	1628300	89814	E3 ubiquitin-protein ligase UHRF1 OS=Homo sapiens OX=9606 GN=UHRF1 PE=1 SV=1
P62995	44	15	13	Carbamidomethylation; Acetylation (Protein N-term)	619860	1396300	2285900	33666	Transformer-2 protein homolog beta OS=Homo sapiens OX=9606 GN=TRA2B PE=1 SV=1
P62328	89	10	10	Oxidation (M); Acetylation (Protein N-term)	4080300	20430000	2144100	5053	Thymosin beta-4 OS=Homo sapiens OX=9606 GN=TMSB4X PE=1 SV=2
P49790	18	17	17		1658000	1288000	2163200	153938	Nuclear pore complex protein Nup153 OS=Homo sapiens OX=9606 GN=NUP153 PE=1 SV=2
Q96AY3	32	15	15	Carbamidomethylation; Oxidation (M)	3022600	1102200	597910	64245	Peptidyl-prolyl cis-trans isomerase FKBP10 OS=Homo sapiens OX=9606 GN=FKBP10 PE=1 SV=1
Q86XP3	32	15	15	Carbamidomethylation	1068600	326130	294250	102975	ATP-dependent RNA helicase DDX42 OS=Homo sapiens OX=9606 GN=DDX42 PE=1 SV=1
Q96GQ7	33	23	22		13651000	4836700	3060900	89835	Probable ATP-dependent RNA helicase DDX27 OS=Homo sapiens OX=9606 GN=DDX27 PE=1 SV=2
P46783	64	14	13		12177000	4331500	4723200	18898	40S ribosomal protein S10 OS=Homo sapiens OX=9606 GN=RPS10 PE=1 SV=1
O95202	28	16	16		4501000	2268200	1760400	83354	Mitochondrial proton/calcium exchanger protein OS=Homo sapiens OX=9606 GN=LETM1 PE=1 SV=1
Q14137	31	12	12	Carbamidomethylation	486160	690860	845200	83630	Ribosome biogenesis protein BOP1 OS=Homo sapiens OX=9606 GN=BOP1 PE=1 SV=2
P12004	67	13	13	Carbamidomethylation; Oxidation (M)	13302000	6064500	3351800	28769	Proliferating cell nuclear antigen OS=Homo sapiens OX=9606 GN=PCNA PE=1 SV=1
P61604	79	14	14	Acetylation (Protein N-term)	4170800	21351000	4327900	10932	10 kDa heat shock protein mitochondrial OS=Homo sapiens OX=9606 GN=HSPE1 PE=1 SV=2
P10599	89	11	11	Carbamidomethylation; Oxidation (M)	17034000	12189000	18410000	11737	Thioredoxin OS=Homo sapiens OX=9606 GN=TXN PE=1 SV=3
Q15691	79	15	15	Carbamidomethylation; Oxidation (M); Acetylation (Protein N-term)	3641500	2893900	2940600	29999	Microtubule-associated protein RP/EB family member 1 OS=Homo sapiens OX=9606 GN=MAPRE1 PE=1 SV=3
P35613	26	10	10	Carbamidomethylation; Oxidation (M)	1682000	5153300	1767200	42200	Basigin OS=Homo sapiens OX=9606 GN=BSG PE=1 SV=2
Q9NZI8	28	13	11		1746100	2080100	694220	63481	Insulin-like growth factor 2 mRNA-binding protein 1 OS=Homo sapiens OX=9606 GN=IGF2BP1 PE=1 SV=2
P61254	53	14	4		16646	1260100	737270	17258	60S ribosomal protein L26 OS=Homo sapiens OX=9606 GN=RPL26 PE=1 SV=1
O75489	52	14	14		3506300	1170700	1279100	30242	NADH dehydrogenase [ubiquinone] iron-sulfur protein 3 mitochondrial OS=Homo sapiens OX=9606 GN=NDUFS3 PE=1 SV=1
P26368	51	16	16	Carbamidomethylation; Oxidation (M)	2350300	540040	1325800	53501	Splicing factor U2AF 65 kDa subunit OS=Homo sapiens OX=9606 GN=U2AF2 PE=1 SV=4
Q04837	64	10	10		2667200	2330000	1186900	17260	Single-stranded DNA-binding protein mitochondrial OS=Homo sapiens OX=9606 GN=SSBP1 PE=1 SV=1
Q01650	14	10	9	Carbamidomethylation	82719	1075400	508430	55010	Large neutral amino acids transporter small subunit 1 OS=Homo sapiens OX=9606 GN=SLC7A5 PE=1 SV=2
Q15293	62	16	16		602690	1381000	565490	38890	Reticulocalbin-1 OS=Homo sapiens OX=9606 GN=RCN1 PE=1 SV=1
P06396	21	12	12		3211900	1226400	607370	85697	Gelsolin OS=Homo sapiens OX=9606 GN=GSN PE=1 SV=1
Q5T9A4	32	18	5		345950	133190	76689	72573	ATPase family AAA domain-containing protein 3B OS=Homo sapiens OX=9606 GN=ATAD3B PE=1 SV=1
P62913	67	14	14	Carbamidomethylation; Oxidation (M); Acetylation (Protein N-term)	2659100	3042200	2459900	20252	60S ribosomal protein L11 OS=Homo sapiens OX=9606 GN=RPL11 PE=1 SV=2
P30048	61	15	15	Carbamidomethylation	3912500	2141300	2771600	27693	Thioredoxin-dependent peroxide reductase mitochondrial OS=Homo sapiens OX=9606 GN=PRDX3 PE=1 SV=3
P51665	47	12	12	Carbamidomethylation	1261300	568670	2349300	37025	26S proteasome non-ATPase regulatory subunit 7 OS=Homo sapiens OX=9606 GN=PSMD7 PE=1 SV=2
Q5SSJ5	33	18	18	Acetylation (Protein N-term)	375410	1072900	1119600	61207	Heterochromatin protein 1-binding protein 3 OS=Homo sapiens OX=9606 GN=HP1BP3 PE=1 SV=1
P39019	68	16	16	Oxidation (M)	1370200	5094100	4557900	16060	40S ribosomal protein S19 OS=Homo sapiens OX=9606 GN=RPS19 PE=1 SV=2
P54920	65	13	13	Carbamidomethylation	3598200	1958700	2087500	33233	Alpha-soluble NSF attachment protein OS=Homo sapiens OX=9606 GN=NAPA PE=1 SV=3
P08559	55	20	20	Carbamidomethylation; Oxidation (M)	5646900	7790900	20901000	43296	Pyruvate dehydrogenase E1 component subunit alpha somatic form mitochondrial OS=Homo sapiens OX=9606 GN=PDHA1 PE=1 SV=3
Q13123	28	12	12		20655	680980	768300	65602	Protein Red OS=Homo sapiens OX=9606 GN=IK PE=1 SV=3
O60832	42	16	16	Carbamidomethylation; Acetylation (Protein N-term)	401450	2102000	2699500	57674	H/ACA ribonucleoprotein complex subunit DKC1 OS=Homo sapiens OX=9606 GN=DKC1 PE=1 SV=3
Q09028	61	15	9	Carbamidomethylation; Oxidation (M); Acetylation (Protein N-term)	1581000	685250	247960	47656	Histone-binding protein RBBP4 OS=Homo sapiens OX=9606 GN=RBBP4 PE=1 SV=3
Q8IYD1	21	11	2	Carbamidomethylation; Oxidation (M)	584730	79734	1238400	68883	Eukaryotic peptide chain release factor GTP-binding subunit ERF3B OS=Homo sapiens OX=9606 GN=GSPT2 PE=1 SV=2
P0DP24	61	12	12	Acetylation (Protein N-term)	1213900	8984500	1125100	16838	Calmodulin-2 OS=Homo sapiens OX=9606 GN=CALM2 PE=1 SV=1
P0DP23	61	12	12	Acetylation (Protein N-term)	1213900	8984500	1125100	16838	Calmodulin-1 OS=Homo sapiens OX=9606 GN=CALM1 PE=1 SV=1
P0DP25	61	12	12	Acetylation (Protein N-term)	1213900	8984500	1125100	16838	Calmodulin-3 OS=Homo sapiens OX=9606 GN=CALM3 PE=1 SV=1
Q07955	53	17	16	Carbamidomethylation; Oxidation (M)	2088100	3748500	1158500	27745	Serine/arginine-rich splicing factor 1 OS=Homo sapiens OX=9606 GN=SRSF1 PE=1 SV=2
Q6YHK3	12	13	13	Oxidation (M)	2407300	2514500	432320	161688	CD109 antigen OS=Homo sapiens OX=9606 GN=CD109 PE=1 SV=2
P30085	58	10	10	Oxidation (M)	1641000	921240	2303600	22222	UMP-CMP kinase OS=Homo sapiens OX=9606 GN=CMPK1 PE=1 SV=3
P16401	41	11	7	Acetylation (Protein N-term)	216820	5409400	496490	22580	Histone H1.5 OS=Homo sapiens OX=9606 GN=H1-5 PE=1 SV=3
P27635	54	16	16	Carbamidomethylation; Oxidation (M)	1921900	3015800	3437600	24604	60S ribosomal protein L10 OS=Homo sapiens OX=9606 GN=RPL10 PE=1 SV=4
P27348	53	16	11	Carbamidomethylation; Oxidation (M)	1259400	2745700	724270	27764	14-3-3 protein theta OS=Homo sapiens OX=9606 GN=YWHAQ PE=1 SV=1
O00264	44	7	7		528660	350600	583650	21671	Membrane-associated progesterone receptor component 1 OS=Homo sapiens OX=9606 GN=PGRMC1 PE=1 SV=3
P42771	70	8	8	Carbamidomethylation; Oxidation (M); Acetylation (Protein N-term)	1430800	1710200	529730	16533	Cyclin-dependent kinase inhibitor 2A OS=Homo sapiens OX=9606 GN=CDKN2A PE=1 SV=2
P26373	51	13	13	Oxidation (M)	755520	4251700	4348300	24261	60S ribosomal protein L13 OS=Homo sapiens OX=9606 GN=RPL13 PE=1 SV=4
P51572	45	14	14		61808	716260	523130	27992	B-cell receptor-associated protein 31 OS=Homo sapiens OX=9606 GN=BCAP31 PE=1 SV=3
Q8NHQ9	30	9	9	Acetylation (Protein N-term)	2226000	266510	156800	68547	ATP-dependent RNA helicase DDX55 OS=Homo sapiens OX=9606 GN=DDX55 PE=1 SV=3
O43852	54	13	13		1368100	2204200	674380	37107	Calumenin OS=Homo sapiens OX=9606 GN=CALU PE=1 SV=2
O14929	32	10	10	Carbamidomethylation	452030	639160	485930	49513	Histone acetyltransferase type B catalytic subunit OS=Homo sapiens OX=9606 GN=HAT1 PE=1 SV=1
P51148	59	10	7	Oxidation (M)	1166600	813500	497660	23483	Ras-related protein Rab-5C OS=Homo sapiens OX=9606 GN=RAB5C PE=1 SV=2
P06756	17	10	10		713540	242920	554370	116038	Integrin alpha-V OS=Homo sapiens OX=9606 GN=ITGAV PE=1 SV=2
O75822	49	11	11	Carbamidomethylation; Acetylation (Protein N-term)	3941300	1093300	686270	29062	Eukaryotic translation initiation factor 3 subunit J OS=Homo sapiens OX=9606 GN=EIF3J PE=1 SV=2
P06454	38	7	7	Acetylation (Protein N-term)	138280	7729400	617290	12203	Prothymosin alpha OS=Homo sapiens OX=9606 GN=PTMA PE=1 SV=2
P51398	46	13	13		3697100	2727300	960220	45566	28S ribosomal protein S29 mitochondrial OS=Homo sapiens OX=9606 GN=DAP3 PE=1 SV=1
O43684	50	11	11	Carbamidomethylation	654250	842360	654180	37155	Mitotic checkpoint protein BUB3 OS=Homo sapiens OX=9606 GN=BUB3 PE=1 SV=1
Q13148	37	10	10	Carbamidomethylation	579750	720920	696630	44740	TAR DNA-binding protein 43 OS=Homo sapiens OX=9606 GN=TARDBP PE=1 SV=1
Q14669	12	17	17	Acetylation (Protein N-term)	1285900	407880	580630	220432	E3 ubiquitin-protein ligase TRIP12 OS=Homo sapiens OX=9606 GN=TRIP12 PE=1 SV=1
Q13185	60	10	8	Carbamidomethylation; Oxidation (M)	114690	1735600	853120	20811	Chromobox protein homolog 3 OS=Homo sapiens OX=9606 GN=CBX3 PE=1 SV=4
O15042	30	20	20		2376500	900800	358880	118292	U2 snRNP-associated SURP motif-containing protein OS=Homo sapiens OX=9606 GN=U2SURP PE=1 SV=2
P08621	46	21	21	Carbamidomethylation	324650	2988500	2374800	51557	U1 small nuclear ribonucleoprotein 70 kDa OS=Homo sapiens OX=9606 GN=SNRNP70 PE=1 SV=2
P30566	43	14	14	Carbamidomethylation; Acetylation (Protein N-term)	3993400	1270500	2082200	54889	Adenylosuccinate lyase OS=Homo sapiens OX=9606 GN=ADSL PE=1 SV=2
O95816	67	12	12	Carbamidomethylation	1058000	843900	1175400	23772	BAG family molecular chaperone regulator 2 OS=Homo sapiens OX=9606 GN=BAG2 PE=1 SV=1
P20839	37	14	11	Carbamidomethylation	1079200	241110	686010	55406	Inosine-5'-monophosphate dehydrogenase 1 OS=Homo sapiens OX=9606 GN=IMPDH1 PE=1 SV=2
P60953	58	9	8	Carbamidomethylation	4030700	1402900	1042200	21259	Cell division control protein 42 homolog OS=Homo sapiens OX=9606 GN=CDC42 PE=1 SV=2
P24928	15	17	17		3659500	316610	466500	217174	DNA-directed RNA polymerase II subunit RPB1 OS=Homo sapiens OX=9606 GN=POLR2A PE=1 SV=2
Q9BWD1	43	10	10	Carbamidomethylation; Acetylation (Protein N-term)	2699600	817070	858900	41351	Acetyl-CoA acetyltransferase cytosolic OS=Homo sapiens OX=9606 GN=ACAT2 PE=1 SV=2
P43121	22	10	10		1058600	1623600	570120	71608	Cell surface glycoprotein MUC18 OS=Homo sapiens OX=9606 GN=MCAM PE=1 SV=2
P61006	46	10	4		123160	264730	233010	23668	Ras-related protein Rab-8A OS=Homo sapiens OX=9606 GN=RAB8A PE=1 SV=1
Q03252	42	22	18		733830	3860300	2211700	69948	Lamin-B2 OS=Homo sapiens OX=9606 GN=LMNB2 PE=1 SV=4
Q9H9J2	28	10	10		8933700	241490	442470	37535	39S ribosomal protein L44 mitochondrial OS=Homo sapiens OX=9606 GN=MRPL44 PE=1 SV=1
P62269	67	18	17	Oxidation (M); Acetylation (Protein N-term)	1568400	5534000	3243500	17719	40S ribosomal protein S18 OS=Homo sapiens OX=9606 GN=RPS18 PE=1 SV=3
Q8WTT2	25	18	18		220490	620550	465410	92548	Nucleolar complex protein 3 homolog OS=Homo sapiens OX=9606 GN=NOC3L PE=1 SV=1
P62841	43	10	10	Oxidation (M)	1352500	769260	1332000	17040	40S ribosomal protein S15 OS=Homo sapiens OX=9606 GN=RPS15 PE=1 SV=2
P14324	26	8	8	Carbamidomethylation; Oxidation (M)	998120	2591400	777990	48276	Farnesyl pyrophosphate synthase OS=Homo sapiens OX=9606 GN=FDPS PE=1 SV=4
O00469	25	14	14		2579000	1316700	954680	84686	Procollagen-lysine 2-oxoglutarate 5-dioxygenase 2 OS=Homo sapiens OX=9606 GN=PLOD2 PE=1 SV=2
P35659	46	16	16	Acetylation (Protein N-term)	249590	1831900	976720	42674	Protein DEK OS=Homo sapiens OX=9606 GN=DEK PE=1 SV=1
Q9HCE1	22	15	15		321050	2458100	2061700	113671	Helicase MOV-10 OS=Homo sapiens OX=9606 GN=MOV10 PE=1 SV=2
P08240	32	15	15		392450	2160100	759050	69811	Signal recognition particle receptor subunit alpha OS=Homo sapiens OX=9606 GN=SRPRA PE=1 SV=2
Q99848	48	18	18		1322800	3656800	4401000	34852	Probable rRNA-processing protein EBP2 OS=Homo sapiens OX=9606 GN=EBNA1BP2 PE=1 SV=2
P26006	15	13	13	Oxidation (M)	205490	781380	297070	116612	Integrin alpha-3 OS=Homo sapiens OX=9606 GN=ITGA3 PE=1 SV=5
Q9BQ52	22	11	11	Carbamidomethylation	504770	695890	2144400	92219	Zinc phosphodiesterase ELAC protein 2 OS=Homo sapiens OX=9606 GN=ELAC2 PE=1 SV=2
P52948	15	15	15	Carbamidomethylation	286900	111460	801360	197578	Nuclear pore complex protein Nup98-Nup96 OS=Homo sapiens OX=9606 GN=NUP98 PE=1 SV=4
O95336	52	10	10	Carbamidomethylation; Oxidation (M)	3998900	463080	3640900	27547	6-phosphogluconolactonase OS=Homo sapiens OX=9606 GN=PGLS PE=1 SV=2
O00303	45	13	13	Carbamidomethylation; Oxidation (M)	1045800	1561100	1820800	37564	Eukaryotic translation initiation factor 3 subunit F OS=Homo sapiens OX=9606 GN=EIF3F PE=1 SV=1
P62899	46	10	10	Oxidation (M)	2974100	2546100	2236000	14463	60S ribosomal protein L31 OS=Homo sapiens OX=9606 GN=RPL31 PE=1 SV=1
P17931	44	11	11	Oxidation (M)	2182700	3796800	5746000	26152	Galectin-3 OS=Homo sapiens OX=9606 GN=LGALS3 PE=1 SV=5
Q7L014	14	13	13		430760	660970	1935500	117362	Probable ATP-dependent RNA helicase DDX46 OS=Homo sapiens OX=9606 GN=DDX46 PE=1 SV=2
Q14166	45	19	19	Carbamidomethylation	1734600	475280	1184800	74404	Tubulin--tyrosine ligase-like protein 12 OS=Homo sapiens OX=9606 GN=TTLL12 PE=1 SV=2
P00568	48	8	8	Carbamidomethylation; Oxidation (M)	2713100	944060	668340	21635	Adenylate kinase isoenzyme 1 OS=Homo sapiens OX=9606 GN=AK1 PE=1 SV=3
P67775	58	12	10	Carbamidomethylation; Oxidation (M)	2257700	905120	1051000	35594	Serine/threonine-protein phosphatase 2A catalytic subunit alpha isoform OS=Homo sapiens OX=9606 GN=PPP2CA PE=1 SV=1
P28070	48	8	8	Oxidation (M)	2726600	1835400	942590	29204	Proteasome subunit beta type-4 OS=Homo sapiens OX=9606 GN=PSMB4 PE=1 SV=4
Q86U38	27	9	9		66936	608670	286170	69438	Nucleolar protein 9 OS=Homo sapiens OX=9606 GN=NOP9 PE=1 SV=1
P30046	89	9	9	Carbamidomethylation	5207900	2555300	1677600	12712	D-dopachrome decarboxylase OS=Homo sapiens OX=9606 GN=DDT PE=1 SV=3
Q92974	20	11	11		367080	1781600	400550	111543	Rho guanine nucleotide exchange factor 2 OS=Homo sapiens OX=9606 GN=ARHGEF2 PE=1 SV=4
P13693	77	10	10	Carbamidomethylation; Oxidation (M)	8109500	4515800	1162100	19595	Translationally-controlled tumor protein OS=Homo sapiens OX=9606 GN=TPT1 PE=1 SV=1
O00560	56	9	9	Carbamidomethylation; Acetylation (Protein N-term)	1733800	788390	371340	32444	Syntenin-1 OS=Homo sapiens OX=9606 GN=SDCBP PE=1 SV=1
P50552	42	13	13	Carbamidomethylation	342470	474600	3106900	39830	Vasodilator-stimulated phosphoprotein OS=Homo sapiens OX=9606 GN=VASP PE=1 SV=3
P47712	17	9	9		655550	318620	386560	85239	Cytosolic phospholipase A2 OS=Homo sapiens OX=9606 GN=PLA2G4A PE=1 SV=2
Q96KP4	32	11	11	Carbamidomethylation	1577800	490480	342520	52879	Cytosolic non-specific dipeptidase OS=Homo sapiens OX=9606 GN=CNDP2 PE=1 SV=2
P49720	56	8	8	Carbamidomethylation; Acetylation (Protein N-term)	2083400	1045800	1751300	22949	Proteasome subunit beta type-3 OS=Homo sapiens OX=9606 GN=PSMB3 PE=1 SV=2
Q9UBS4	34	9	9	Carbamidomethylation	592120	549500	1553400	40514	DnaJ homolog subfamily B member 11 OS=Homo sapiens OX=9606 GN=DNAJB11 PE=1 SV=1
Q9NSD9	38	19	19	Carbamidomethylation	1016900	1026500	1561000	66116	Phenylalanine--tRNA ligase beta subunit OS=Homo sapiens OX=9606 GN=FARSB PE=1 SV=3
Q15021	20	17	17		1357600	898040	691690	157182	Condensin complex subunit 1 OS=Homo sapiens OX=9606 GN=NCAPD2 PE=1 SV=3
P53992	21	15	14	Carbamidomethylation	393140	592790	962460	118325	Protein transport protein Sec24C OS=Homo sapiens OX=9606 GN=SEC24C PE=1 SV=3
Q96EY1	25	11	11		3067300	2758300	2248000	52489	DnaJ homolog subfamily A member 3 mitochondrial OS=Homo sapiens OX=9606 GN=DNAJA3 PE=1 SV=2
P15291	27	6	6	Oxidation (M)	859950	215890	619240	43920	Beta-1 4-galactosyltransferase 1 OS=Homo sapiens OX=9606 GN=B4GALT1 PE=1 SV=5
Q14244	26	17	16	Acetylation (Protein N-term)	2410200	31559000	1285500	84052	Ensconsin OS=Homo sapiens OX=9606 GN=MAP7 PE=1 SV=1
P51648	31	11	9	Carbamidomethylation; Oxidation (M)	1030700	279040	676390	54848	Aldehyde dehydrogenase family 3 member A2 OS=Homo sapiens OX=9606 GN=ALDH3A2 PE=1 SV=1
P20674	76	13	13	Oxidation (M)	1331000	5135700	1543100	16762	Cytochrome c oxidase subunit 5A mitochondrial OS=Homo sapiens OX=9606 GN=COX5A PE=1 SV=2
Q13084	45	9	9		1748200	218270	202440	30157	39S ribosomal protein L28 mitochondrial OS=Homo sapiens OX=9606 GN=MRPL28 PE=1 SV=4
Q9NS69	77	7	7	Oxidation (M); Acetylation (Protein N-term)	2102100	509710	730010	15522	Mitochondrial import receptor subunit TOM22 homolog OS=Homo sapiens OX=9606 GN=TOMM22 PE=1 SV=3
Q969V3	30	12	12		129700	1548300	1122500	62974	Nicalin OS=Homo sapiens OX=9606 GN=NCLN PE=1 SV=2
Q96E11	48	9	9	Carbamidomethylation	228180	402280	333450	29277	Ribosome-recycling factor mitochondrial OS=Homo sapiens OX=9606 GN=MRRF PE=1 SV=1
Q86V81	40	9	9	Acetylation (Protein N-term)	2885800	1919600	986310	26888	THO complex subunit 4 OS=Homo sapiens OX=9606 GN=ALYREF PE=1 SV=3
Q07666	27	11	11		2409000	1669700	729670	48227	KH domain-containing RNA-binding signal transduction-associated protein 1 OS=Homo sapiens OX=9606 GN=KHDRBS1 PE=1 SV=1
Q9Y617	55	16	16	Carbamidomethylation; Oxidation (M)	1437400	1433200	1126900	40423	Phosphoserine aminotransferase OS=Homo sapiens OX=9606 GN=PSAT1 PE=1 SV=2
P51571	38	7	7		2679700	2628600	1756000	18999	Translocon-associated protein subunit delta OS=Homo sapiens OX=9606 GN=SSR4 PE=1 SV=1
P62249	64	15	15		1086400	4294900	3162000	16445	40S ribosomal protein S16 OS=Homo sapiens OX=9606 GN=RPS16 PE=1 SV=2
Q16629	32	11	10		1844800	2269000	1584700	27367	Serine/arginine-rich splicing factor 7 OS=Homo sapiens OX=9606 GN=SRSF7 PE=1 SV=1
P62491	50	11	11	Acetylation (Protein N-term)	756110	2659300	832710	24394	Ras-related protein Rab-11A OS=Homo sapiens OX=9606 GN=RAB11A PE=1 SV=3
Q15907	50	11	11	Acetylation (Protein N-term)	756110	2659300	832710	24488	Ras-related protein Rab-11B OS=Homo sapiens OX=9606 GN=RAB11B PE=1 SV=4
P35249	29	9	9		658500	907200	1601800	39682	Replication factor C subunit 4 OS=Homo sapiens OX=9606 GN=RFC4 PE=1 SV=2
P14384	24	9	9		785200	193860	172980	50514	Carboxypeptidase M OS=Homo sapiens OX=9606 GN=CPM PE=1 SV=2
P31949	56	7	7	Carbamidomethylation; Oxidation (M)	8033900	4811600	3998700	11740	Protein S100-A11 OS=Homo sapiens OX=9606 GN=S100A11 PE=1 SV=2
O14737	62	8	8	Acetylation (Protein N-term)	418410	1399900	604700	14285	Programmed cell death protein 5 OS=Homo sapiens OX=9606 GN=PDCD5 PE=1 SV=3
P05186	39	16	16	Carbamidomethylation	922150	303360	3137800	57305	Alkaline phosphatase tissue-nonspecific isozyme OS=Homo sapiens OX=9606 GN=ALPL PE=1 SV=4
Q9NWH9	14	11	11	Acetylation (Protein N-term)	42750	1829800	367290	117149	SAFB-like transcription modulator OS=Homo sapiens OX=9606 GN=SLTM PE=1 SV=2
Q10567	14	11	5		5964700	787930	264980	104637	AP-1 complex subunit beta-1 OS=Homo sapiens OX=9606 GN=AP1B1 PE=1 SV=2
P84098	29	12	12	Oxidation (M)	439760	3703400	1685800	23466	60S ribosomal protein L19 OS=Homo sapiens OX=9606 GN=RPL19 PE=1 SV=1
Q32P28	32	13	13	Carbamidomethylation	1245500	739820	526980	83394	Prolyl 3-hydroxylase 1 OS=Homo sapiens OX=9606 GN=P3H1 PE=1 SV=2
Q9Y6C9	37	8	8	Carbamidomethylation	343840	330750	1931100	33331	Mitochondrial carrier homolog 2 OS=Homo sapiens OX=9606 GN=MTCH2 PE=1 SV=1
Q13428	17	19	19		271110	1706400	1018900	152105	Treacle protein OS=Homo sapiens OX=9606 GN=TCOF1 PE=1 SV=3
Q9BUP3	53	14	14	Carbamidomethylation	15839000	4290000	1369100	27049	Oxidoreductase HTATIP2 OS=Homo sapiens OX=9606 GN=HTATIP2 PE=1 SV=2
P82933	32	11	11		3397200	1184900	6163400	45835	28S ribosomal protein S9 mitochondrial OS=Homo sapiens OX=9606 GN=MRPS9 PE=1 SV=2
Q13155	52	11	11	Carbamidomethylation	1012800	579290	1645300	35349	Aminoacyl tRNA synthase complex-interacting multifunctional protein 2 OS=Homo sapiens OX=9606 GN=AIMP2 PE=1 SV=2
Q92804	30	9	7	Carbamidomethylation	1154100	276460	310360	61830	TATA-binding protein-associated factor 2N OS=Homo sapiens OX=9606 GN=TAF15 PE=1 SV=1
P49257	31	10	10	Carbamidomethylation; Oxidation (M)	1112300	824400	394030	57549	Protein ERGIC-53 OS=Homo sapiens OX=9606 GN=LMAN1 PE=1 SV=2
P07108	90	7	7	Oxidation (M); Acetylation (Protein N-term)	2457600	2468900	1614700	10044	Acyl-CoA-binding protein OS=Homo sapiens OX=9606 GN=DBI PE=1 SV=2
Q00688	44	11	11		358160	659890	239100	25177	Peptidyl-prolyl cis-trans isomerase FKBP3 OS=Homo sapiens OX=9606 GN=FKBP3 PE=1 SV=1
O00429	23	9	9	Carbamidomethylation	622150	85559	1151700	81877	Dynamin-1-like protein OS=Homo sapiens OX=9606 GN=DNM1L PE=1 SV=2
Q92769	27	10	6		89048	91423	305180	55364	Histone deacetylase 2 OS=Homo sapiens OX=9606 GN=HDAC2 PE=1 SV=2
Q13247	25	10	6		7826.1	330040	124610	39587	Serine/arginine-rich splicing factor 6 OS=Homo sapiens OX=9606 GN=SRSF6 PE=1 SV=2
Q9UIJ7	36	6	6		672420	288290	156520	25565	GTP:AMP phosphotransferase AK3 mitochondrial OS=Homo sapiens OX=9606 GN=AK3 PE=1 SV=4
Q9H6F5	32	7	7		299250	1066800	243190	40236	Coiled-coil domain-containing protein 86 OS=Homo sapiens OX=9606 GN=CCDC86 PE=1 SV=1
P10768	46	9	9	Carbamidomethylation; Oxidation (M)	1338800	827250	1898000	31463	S-formylglutathione hydrolase OS=Homo sapiens OX=9606 GN=ESD PE=1 SV=2
P46779	59	14	14	Carbamidomethylation; Acetylation (Protein N-term)	189770	1670200	2458100	15747	60S ribosomal protein L28 OS=Homo sapiens OX=9606 GN=RPL28 PE=1 SV=3
P84103	41	9	8		3815200	2483900	2605500	19330	Serine/arginine-rich splicing factor 3 OS=Homo sapiens OX=9606 GN=SRSF3 PE=1 SV=1
Q9NZB2	18	14	14		11852000	9885900	1087000	121888	Constitutive coactivator of PPAR-gamma-like protein 1 OS=Homo sapiens OX=9606 GN=FAM120A PE=1 SV=2
Q96CS3	24	8	8	Acetylation (Protein N-term)	1035300	145010	1285600	52624	FAS-associated factor 2 OS=Homo sapiens OX=9606 GN=FAF2 PE=1 SV=2
P17174	51	14	14		1853600	933200	1067600	46248	Aspartate aminotransferase cytoplasmic OS=Homo sapiens OX=9606 GN=GOT1 PE=1 SV=3
P68400	42	11	11		1147200	377700	539620	45144	Casein kinase II subunit alpha OS=Homo sapiens OX=9606 GN=CSNK2A1 PE=1 SV=1
Q13057	33	9	9	Carbamidomethylation	448400	124600	817050	62329	Bifunctional coenzyme A synthase OS=Homo sapiens OX=9606 GN=COASY PE=1 SV=4
Q9BYD3	50	9	9		1707800	380840	1157600	34919	39S ribosomal protein L4 mitochondrial OS=Homo sapiens OX=9606 GN=MRPL4 PE=1 SV=1
P18859	49	6	6		854340	895260	164230	12588	ATP synthase-coupling factor 6 mitochondrial OS=Homo sapiens OX=9606 GN=ATP5PF PE=1 SV=1
Q8WXX5	34	9	9	Carbamidomethylation	753110	1483300	759560	29910	DnaJ homolog subfamily C member 9 OS=Homo sapiens OX=9606 GN=DNAJC9 PE=1 SV=1
Q02978	54	12	12	Acetylation (Protein N-term)	306000	791040	1160000	34062	Mitochondrial 2-oxoglutarate/malate carrier protein OS=Homo sapiens OX=9606 GN=SLC25A11 PE=1 SV=3
O95299	32	7	7	Carbamidomethylation	613330	161890	1588100	40751	NADH dehydrogenase [ubiquinone] 1 alpha subcomplex subunit 10 mitochondrial OS=Homo sapiens OX=9606 GN=NDUFA10 PE=1 SV=1
Q9Y281	43	6	2		1346800	530670	194940	18737	Cofilin-2 OS=Homo sapiens OX=9606 GN=CFL2 PE=1 SV=1
Q5JTV8	35	14	13	Carbamidomethylation	381390	537150	446490	66248	Torsin-1A-interacting protein 1 OS=Homo sapiens OX=9606 GN=TOR1AIP1 PE=1 SV=2
P28072	60	10	10	Carbamidomethylation; Oxidation (M)	959840	1682000	586870	25358	Proteasome subunit beta type-6 OS=Homo sapiens OX=9606 GN=PSMB6 PE=1 SV=4
Q7L0Y3	34	10	10	Carbamidomethylation	516860	301700	382830	47347	tRNA methyltransferase 10 homolog C OS=Homo sapiens OX=9606 GN=TRMT10C PE=1 SV=2
P35251	7	7	7		163190	194800	1405900	128254	Replication factor C subunit 1 OS=Homo sapiens OX=9606 GN=RFC1 PE=1 SV=4
P04920	20	15	15		471770	2271300	2044100	137009	Anion exchange protein 2 OS=Homo sapiens OX=9606 GN=SLC4A2 PE=1 SV=4
Q01844	16	6	6	Carbamidomethylation; Oxidation (M)	204170	886260	240190	68478	RNA-binding protein EWS OS=Homo sapiens OX=9606 GN=EWSR1 PE=1 SV=1
Q9H3N1	36	10	10	Carbamidomethylation	179890	2461700	776150	31791	Thioredoxin-related transmembrane protein 1 OS=Homo sapiens OX=9606 GN=TMX1 PE=1 SV=1
Q969X6	31	14	14		606040	437400	396920	76890	U3 small nucleolar RNA-associated protein 4 homolog OS=Homo sapiens OX=9606 GN=UTP4 PE=1 SV=1
P62879	48	11	4	Carbamidomethylation; Acetylation (Protein N-term)	273880	43132	324720	37331	Guanine nucleotide-binding protein G(I)/G(S)/G(T) subunit beta-2 OS=Homo sapiens OX=9606 GN=GNB2 PE=1 SV=3
P52788	49	9	9	Carbamidomethylation	3483800	735370	1930900	41268	Spermine synthase OS=Homo sapiens OX=9606 GN=SMS PE=1 SV=2
P62316	65	10	10	Carbamidomethylation	3060000	2463300	1436600	13527	Small nuclear ribonucleoprotein Sm D2 OS=Homo sapiens OX=9606 GN=SNRPD2 PE=1 SV=1
Q96DI7	38	8	8	Carbamidomethylation; Oxidation (M)	1141700	128450	285740	39311	U5 small nuclear ribonucleoprotein 40 kDa protein OS=Homo sapiens OX=9606 GN=SNRNP40 PE=1 SV=1
P46776	33	8	8	Carbamidomethylation	594920	651840	2120200	16561	60S ribosomal protein L27a OS=Homo sapiens OX=9606 GN=RPL27A PE=1 SV=2
P62266	50	9	9	Carbamidomethylation	263590	934290	1258100	15808	40S ribosomal protein S23 OS=Homo sapiens OX=9606 GN=RPS23 PE=1 SV=3
P52565	64	10	10	Acetylation (Protein N-term)	6656100	5658400	830300	23207	Rho GDP-dissociation inhibitor 1 OS=Homo sapiens OX=9606 GN=ARHGDIA PE=1 SV=3
Q9Y3C1	52	10	10		369040	2364100	1094100	21188	Nucleolar protein 16 OS=Homo sapiens OX=9606 GN=NOP16 PE=1 SV=2
P26358	11	14	14	Carbamidomethylation	126910	108400	229220	183164	DNA (cytosine-5)-methyltransferase 1 OS=Homo sapiens OX=9606 GN=DNMT1 PE=1 SV=2
P54709	49	11	11		19853000	4285500	2870400	31513	Sodium/potassium-transporting ATPase subunit beta-3 OS=Homo sapiens OX=9606 GN=ATP1B3 PE=1 SV=1
P47985	58	12	11		1898500	929560	2106300	29668	Cytochrome b-c1 complex subunit Rieske mitochondrial OS=Homo sapiens OX=9606 GN=UQCRFS1 PE=1 SV=2
Q16401	42	15	15	Carbamidomethylation; Oxidation (M); Acetylation (Protein N-term)	1660900	4551800	963770	56196	26S proteasome non-ATPase regulatory subunit 5 OS=Homo sapiens OX=9606 GN=PSMD5 PE=1 SV=3
O60716	17	10	10	Carbamidomethylation; Acetylation (Protein N-term)	3729600	421550	381330	108170	Catenin delta-1 OS=Homo sapiens OX=9606 GN=CTNND1 PE=1 SV=1
P29317	10	8	8		144880	532690	1330400	108266	Ephrin type-A receptor 2 OS=Homo sapiens OX=9606 GN=EPHA2 PE=1 SV=2
P10606	60	10	10	Carbamidomethylation	1162000	3955700	487030	13696	Cytochrome c oxidase subunit 5B mitochondrial OS=Homo sapiens OX=9606 GN=COX5B PE=1 SV=2
P62280	54	13	13	Carbamidomethylation	202150	4859200	2438400	18431	40S ribosomal protein S11 OS=Homo sapiens OX=9606 GN=RPS11 PE=1 SV=3
Q16543	42	11	11	Carbamidomethylation; Acetylation (Protein N-term)	4011900	1050800	741240	44468	Hsp90 co-chaperone Cdc37 OS=Homo sapiens OX=9606 GN=CDC37 PE=1 SV=1
O75844	28	11	11		494690	3415400	1275700	54813	CAAX prenyl protease 1 homolog OS=Homo sapiens OX=9606 GN=ZMPSTE24 PE=1 SV=2
P62847	36	8	8	Oxidation (M); Acetylation (Protein N-term)	2800100	2481100	2122000	15423	40S ribosomal protein S24 OS=Homo sapiens OX=9606 GN=RPS24 PE=1 SV=1
P37837	40	13	13	Carbamidomethylation; Acetylation (Protein N-term)	333420	2646200	1674700	37540	Transaldolase OS=Homo sapiens OX=9606 GN=TALDO1 PE=1 SV=2
P22061	59	10	10	Carbamidomethylation	1367700	539420	646930	24636	Protein-L-isoaspartate(D-aspartate) O-methyltransferase OS=Homo sapiens OX=9606 GN=PCMT1 PE=1 SV=4
Q92797	13	9	9		2520100	626740	1939400	141148	Symplekin OS=Homo sapiens OX=9606 GN=SYMPK PE=1 SV=2
P63208	53	10	10	Carbamidomethylation; Oxidation (M)	2053000	832370	265180	18658	S-phase kinase-associated protein 1 OS=Homo sapiens OX=9606 GN=SKP1 PE=1 SV=2
P55010	36	13	13	Carbamidomethylation; Oxidation (M)	1432400	2422500	923030	49223	Eukaryotic translation initiation factor 5 OS=Homo sapiens OX=9606 GN=EIF5 PE=1 SV=2
Q99471	63	7	7	Oxidation (M); Acetylation (Protein N-term)	1604700	300630	302290	17328	Prefoldin subunit 5 OS=Homo sapiens OX=9606 GN=PFDN5 PE=1 SV=2
O95433	41	9	9	Carbamidomethylation	1189700	799230	556160	38274	Activator of 90 kDa heat shock protein ATPase homolog 1 OS=Homo sapiens OX=9606 GN=AHSA1 PE=1 SV=1
P37108	66	9	9		871130	2732700	832100	14570	Signal recognition particle 14 kDa protein OS=Homo sapiens OX=9606 GN=SRP14 PE=1 SV=2
P47813	38	8	8		469490	807970	1481000	16460	Eukaryotic translation initiation factor 1A X-chromosomal OS=Homo sapiens OX=9606 GN=EIF1AX PE=1 SV=2
Q13442	48	10	10		300900	1142600	349890	20630	28 kDa heat- and acid-stable phosphoprotein OS=Homo sapiens OX=9606 GN=PDAP1 PE=1 SV=1
O00764	34	8	8		1253500	431250	244650	35102	Pyridoxal kinase OS=Homo sapiens OX=9606 GN=PDXK PE=1 SV=1
P82650	32	9	9		10078000	1066700	4768000	41280	28S ribosomal protein S22 mitochondrial OS=Homo sapiens OX=9606 GN=MRPS22 PE=1 SV=1
Q9Y2R9	38	9	9		155720	475160	479970	28134	28S ribosomal protein S7 mitochondrial OS=Homo sapiens OX=9606 GN=MRPS7 PE=1 SV=2
P62910	47	12	12	Carbamidomethylation; Oxidation (M)	974860	3036600	6654200	15860	60S ribosomal protein L32 OS=Homo sapiens OX=9606 GN=RPL32 PE=1 SV=2
Q92522	32	9	9	Acetylation (Protein N-term)	76381	479170	630340	22487	Histone H1.10 OS=Homo sapiens OX=9606 GN=H1-10 PE=1 SV=1
P30520	31	10	10	Carbamidomethylation	3054400	345040	327280	50097	Adenylosuccinate synthetase isozyme 2 OS=Homo sapiens OX=9606 GN=ADSS2 PE=1 SV=3
P19105	57	8	4	Carbamidomethylation; Oxidation (M)	3236400	2204800	3090500	19794	Myosin regulatory light chain 12A OS=Homo sapiens OX=9606 GN=MYL12A PE=1 SV=2
O14950	56	8	4	Carbamidomethylation; Oxidation (M)	3236400	2204800	3090500	19779	Myosin regulatory light chain 12B OS=Homo sapiens OX=9606 GN=MYL12B PE=1 SV=2
Q9BRK5	47	8	8		516750	122650	51708	41807	45 kDa calcium-binding protein OS=Homo sapiens OX=9606 GN=SDF4 PE=1 SV=1
Q9GZT3	57	7	7		138760	1217700	2301400	12349	SRA stem-loop-interacting RNA-binding protein mitochondrial OS=Homo sapiens OX=9606 GN=SLIRP PE=1 SV=1
Q96RP9	19	10	10		3133100	543890	571440	83472	Elongation factor G mitochondrial OS=Homo sapiens OX=9606 GN=GFM1 PE=1 SV=2
O15213	26	10	10	Acetylation (Protein N-term)	2659000	1216900	823030	68071	WD repeat-containing protein 46 OS=Homo sapiens OX=9606 GN=WDR46 PE=1 SV=3
Q2TAY7	31	12	12	Acetylation (Protein N-term)	1812600	568440	610150	57544	WD40 repeat-containing protein SMU1 OS=Homo sapiens OX=9606 GN=SMU1 PE=1 SV=2
Q86U42	43	8	8	Acetylation (Protein N-term)	423040	183980	326010	32749	Polyadenylate-binding protein 2 OS=Homo sapiens OX=9606 GN=PABPN1 PE=1 SV=3
P0C0S5	32	10	5		4420500	4733800	2007500	13553	Histone H2A.Z OS=Homo sapiens OX=9606 GN=H2AZ1 PE=1 SV=2
Q71UI9	32	10	5		4420500	4733800	2007500	13509	Histone H2A.V OS=Homo sapiens OX=9606 GN=H2AZ2 PE=1 SV=3
P46781	62	18	18		380980	3910100	3935100	22591	40S ribosomal protein S9 OS=Homo sapiens OX=9606 GN=RPS9 PE=1 SV=3
Q9NYL9	32	8	8	Carbamidomethylation; Oxidation (M)	1549600	1362600	276470	39595	Tropomodulin-3 OS=Homo sapiens OX=9606 GN=TMOD3 PE=1 SV=1
P35268	59	8	8	Carbamidomethylation	440030	3140000	2631300	14787	60S ribosomal protein L22 OS=Homo sapiens OX=9606 GN=RPL22 PE=1 SV=2
P05386	89	5	4	Carbamidomethylation; Oxidation (M)	21002000	3681400	4655200	11514	60S acidic ribosomal protein P1 OS=Homo sapiens OX=9606 GN=RPLP1 PE=1 SV=1
O75683	19	5	5		9031.1	676980	732350	41450	Surfeit locus protein 6 OS=Homo sapiens OX=9606 GN=SURF6 PE=1 SV=3
Q01130	31	8	6	Oxidation (M); Acetylation (Protein N-term)	589240	1231300	489090	25476	Serine/arginine-rich splicing factor 2 OS=Homo sapiens OX=9606 GN=SRSF2 PE=1 SV=4
Q9NRL2	10	9	9	Carbamidomethylation	892260	37172	111990	178702	Bromodomain adjacent to zinc finger domain protein 1A OS=Homo sapiens OX=9606 GN=BAZ1A PE=1 SV=2
Q9H8H2	15	9	9		1756700	768770	1571700	94087	Probable ATP-dependent RNA helicase DDX31 OS=Homo sapiens OX=9606 GN=DDX31 PE=1 SV=2
P08574	35	7	7	Carbamidomethylation	538040	544420	669990	35422	Cytochrome c1 heme protein mitochondrial OS=Homo sapiens OX=9606 GN=CYC1 PE=1 SV=3
P09543	33	9	9	Carbamidomethylation	678320	114170	283890	47579	2' 3'-cyclic-nucleotide 3'-phosphodiesterase OS=Homo sapiens OX=9606 GN=CNP PE=1 SV=2
P84085	58	11	5	Oxidation (M)	126620	94291	59891	20530	ADP-ribosylation factor 5 OS=Homo sapiens OX=9606 GN=ARF5 PE=1 SV=2
Q5BKZ1	21	8	8		148210	893910	214720	65654	DBIRD complex subunit ZNF326 OS=Homo sapiens OX=9606 GN=ZNF326 PE=1 SV=2
Q7Z2K6	15	10	10		3193200	750220	987610	100231	Endoplasmic reticulum metallopeptidase 1 OS=Homo sapiens OX=9606 GN=ERMP1 PE=1 SV=2
P62873	52	13	7	Carbamidomethylation; Oxidation (M); Acetylation (Protein N-term)	398940	348500	221660	37377	Guanine nucleotide-binding protein G(I)/G(S)/G(T) subunit beta-1 OS=Homo sapiens OX=9606 GN=GNB1 PE=1 SV=3
P35270	30	5	5		1581800	846560	320340	28048	Sepiapterin reductase OS=Homo sapiens OX=9606 GN=SPR PE=1 SV=1
P05091	24	10	9		831100	636560	487940	56381	Aldehyde dehydrogenase mitochondrial OS=Homo sapiens OX=9606 GN=ALDH2 PE=1 SV=2
Q15185	48	7	7	Carbamidomethylation	1755300	1508200	1743200	18697	Prostaglandin E synthase 3 OS=Homo sapiens OX=9606 GN=PTGES3 PE=1 SV=1
P56537	33	5	5	Carbamidomethylation	2297400	1112400	807460	26599	Eukaryotic translation initiation factor 6 OS=Homo sapiens OX=9606 GN=EIF6 PE=1 SV=1
Q9NQ55	31	11	11		249730	1478700	2008300	53194	Suppressor of SWI4 1 homolog OS=Homo sapiens OX=9606 GN=PPAN PE=2 SV=1
O75131	25	11	10	Carbamidomethylation	180290	199710	1301700	60131	Copine-3 OS=Homo sapiens OX=9606 GN=CPNE3 PE=1 SV=1
P43487	65	8	8	Carbamidomethylation	1697500	2005800	1217300	23310	Ran-specific GTPase-activating protein OS=Homo sapiens OX=9606 GN=RANBP1 PE=1 SV=1
O76070	69	8	8		248550	892650	169450	13331	Gamma-synuclein OS=Homo sapiens OX=9606 GN=SNCG PE=1 SV=2
P98175	23	11	11		62312	369370	1647100	103533	RNA-binding protein 10 OS=Homo sapiens OX=9606 GN=RBM10 PE=1 SV=3
P16949	47	10	10		907810	2694200	574290	17302	Stathmin OS=Homo sapiens OX=9606 GN=STMN1 PE=1 SV=3
P20290	68	11	11	Carbamidomethylation; Oxidation (M)	6856200	2850000	1969700	22168	Transcription factor BTF3 OS=Homo sapiens OX=9606 GN=BTF3 PE=1 SV=1
P51116	32	11	9		2419900	550420	772990	74223	Fragile X mental retardation syndrome-related protein 2 OS=Homo sapiens OX=9606 GN=FXR2 PE=1 SV=2
Q9Y5L0	14	8	8	Acetylation (Protein N-term)	1571900	1572300	953720	104203	Transportin-3 OS=Homo sapiens OX=9606 GN=TNPO3 PE=1 SV=3
Q99575	16	11	11		184010	402260	500360	114709	Ribonucleases P/MRP protein subunit POP1 OS=Homo sapiens OX=9606 GN=POP1 PE=1 SV=2
Q7Z7K6	47	8	8		0	76584	117450	29946	Centromere protein V OS=Homo sapiens OX=9606 GN=CENPV PE=1 SV=1
P50914	36	10	10	Carbamidomethylation; Oxidation (M)	1042100	3753800	2218500	23432	60S ribosomal protein L14 OS=Homo sapiens OX=9606 GN=RPL14 PE=1 SV=4
O75947	73	11	11	Oxidation (M)	14327000	2880700	2027900	18491	ATP synthase subunit d mitochondrial OS=Homo sapiens OX=9606 GN=ATP5PD PE=1 SV=3
Q92979	57	11	11	Carbamidomethylation; Acetylation (Protein N-term)	988800	3088300	808690	26720	Ribosomal RNA small subunit methyltransferase NEP1 OS=Homo sapiens OX=9606 GN=EMG1 PE=1 SV=4
Q6PIU2	35	9	9	Carbamidomethylation	311640	2019800	515520	45808	Neutral cholesterol ester hydrolase 1 OS=Homo sapiens OX=9606 GN=NCEH1 PE=1 SV=3
P99999	57	9	9		3025900	1261700	5189800	11749	Cytochrome c OS=Homo sapiens OX=9606 GN=CYCS PE=1 SV=2
O75608	55	8	8	Carbamidomethylation; Acetylation (Protein N-term)	802020	396450	1297900	24670	Acyl-protein thioesterase 1 OS=Homo sapiens OX=9606 GN=LYPLA1 PE=1 SV=1
Q9Y2Q9	53	8	8		543630	806680	142340	20843	28S ribosomal protein S28 mitochondrial OS=Homo sapiens OX=9606 GN=MRPS28 PE=1 SV=1
P56182	29	10	10		1517600	1520800	325630	52839	Ribosomal RNA processing protein 1 homolog A OS=Homo sapiens OX=9606 GN=RRP1 PE=1 SV=1
Q96EP5	28	7	7	Carbamidomethylation	458970	269750	402480	43383	DAZ-associated protein 1 OS=Homo sapiens OX=9606 GN=DAZAP1 PE=1 SV=1
P51610	11	11	11	Carbamidomethylation; Acetylation (Protein N-term)	871880	473490	280230	208730	Host cell factor 1 OS=Homo sapiens OX=9606 GN=HCFC1 PE=1 SV=2
P50570	17	11	7		325520	539380	431190	98064	Dynamin-2 OS=Homo sapiens OX=9606 GN=DNM2 PE=1 SV=2
P20618	48	9	9	Carbamidomethylation; Oxidation (M)	796710	1087400	682630	26489	Proteasome subunit beta type-1 OS=Homo sapiens OX=9606 GN=PSMB1 PE=1 SV=2
P60866	49	9	9	Carbamidomethylation; Acetylation (Protein N-term)	2425100	2811900	1478500	13373	40S ribosomal protein S20 OS=Homo sapiens OX=9606 GN=RPS20 PE=1 SV=1
O60762	47	8	8		456600	264650	946460	29634	Dolichol-phosphate mannosyltransferase subunit 1 OS=Homo sapiens OX=9606 GN=DPM1 PE=1 SV=1
O95292	44	9	8	Carbamidomethylation	143860	744180	405530	27228	Vesicle-associated membrane protein-associated protein B/C OS=Homo sapiens OX=9606 GN=VAPB PE=1 SV=3
P62495	35	10	10	Acetylation (Protein N-term)	716270	454520	1351600	49031	Eukaryotic peptide chain release factor subunit 1 OS=Homo sapiens OX=9606 GN=ETF1 PE=1 SV=3
P61353	54	12	12		306280	3407500	1792400	15798	60S ribosomal protein L27 OS=Homo sapiens OX=9606 GN=RPL27 PE=1 SV=2
Q96P70	9	4	4	Acetylation (Protein N-term)	814790	105020	251320	115963	Importin-9 OS=Homo sapiens OX=9606 GN=IPO9 PE=1 SV=3
O60287	9	12	12	Carbamidomethylation	1503200	799540	391710	254386	Nucleolar pre-ribosomal-associated protein 1 OS=Homo sapiens OX=9606 GN=URB1 PE=1 SV=4
O75027	27	11	11		1440500	418740	586330	82641	Iron-sulfur clusters transporter ABCB7 mitochondrial OS=Homo sapiens OX=9606 GN=ABCB7 PE=1 SV=2
P11279	11	5	5		1321300	1387900	589160	44882	Lysosome-associated membrane glycoprotein 1 OS=Homo sapiens OX=9606 GN=LAMP1 PE=1 SV=3
P40938	26	7	7		30985	983960	200590	40556	Replication factor C subunit 3 OS=Homo sapiens OX=9606 GN=RFC3 PE=1 SV=2
P26885	50	5	5	Carbamidomethylation	2053000	607460	120400	15649	Peptidyl-prolyl cis-trans isomerase FKBP2 OS=Homo sapiens OX=9606 GN=FKBP2 PE=1 SV=2
O95881	63	7	7	Oxidation (M)	1996900	612160	1274400	19206	Thioredoxin domain-containing protein 12 OS=Homo sapiens OX=9606 GN=TXNDC12 PE=1 SV=1
Q9BX68	54	6	6	Carbamidomethylation	1685500	647350	2253000	17162	Histidine triad nucleotide-binding protein 2 mitochondrial OS=Homo sapiens OX=9606 GN=HINT2 PE=1 SV=1
Q9NX63	26	7	7		320470	2184900	4506900	26152	MICOS complex subunit MIC19 OS=Homo sapiens OX=9606 GN=CHCHD3 PE=1 SV=1
Q9HAV4	14	12	12	Carbamidomethylation	1674600	637670	764860	136311	Exportin-5 OS=Homo sapiens OX=9606 GN=XPO5 PE=1 SV=1
Q9H0H5	25	9	9		242160	113460	64542	71027	Rac GTPase-activating protein 1 OS=Homo sapiens OX=9606 GN=RACGAP1 PE=1 SV=1
P19387	36	6	6	Carbamidomethylation	762060	246470	186430	31441	DNA-directed RNA polymerase II subunit RPB3 OS=Homo sapiens OX=9606 GN=POLR2C PE=1 SV=2
Q9Y5S9	55	5	5	Oxidation (M); Acetylation (Protein N-term)	554340	458830	122230	19889	RNA-binding protein 8A OS=Homo sapiens OX=9606 GN=RBM8A PE=1 SV=1
Q02818	33	12	11		5367900	750410	571010	53879	Nucleobindin-1 OS=Homo sapiens OX=9606 GN=NUCB1 PE=1 SV=4
P05204	51	7	6		2694.6	498310	380890	9393	Non-histone chromosomal protein HMG-17 OS=Homo sapiens OX=9606 GN=HMGN2 PE=1 SV=3
P43034	31	8	8	Carbamidomethylation	148170	224750	125250	46638	Platelet-activating factor acetylhydrolase IB subunit beta OS=Homo sapiens OX=9606 GN=PAFAH1B1 PE=1 SV=2
Q9BQ39	17	8	5		912150	111940	181860	82565	ATP-dependent RNA helicase DDX50 OS=Homo sapiens OX=9606 GN=DDX50 PE=1 SV=1
A0FGR8	14	9	9		2104200	661730	5457900	102357	Extended synaptotagmin-2 OS=Homo sapiens OX=9606 GN=ESYT2 PE=1 SV=1
Q99584	55	7	7		719380	1350600	482120	11471	Protein S100-A13 OS=Homo sapiens OX=9606 GN=S100A13 PE=1 SV=1
O00505	21	9	5	Carbamidomethylation; Acetylation (Protein N-term)	312690	335140	118090	57811	Importin subunit alpha-4 OS=Homo sapiens OX=9606 GN=KPNA3 PE=1 SV=2
Q13228	39	13	13	Carbamidomethylation	1491100	1069500	544370	52391	Methanethiol oxidase OS=Homo sapiens OX=9606 GN=SELENBP1 PE=1 SV=2
P10586	5	5	5		316550	79125	108630	212877	Receptor-type tyrosine-protein phosphatase F OS=Homo sapiens OX=9606 GN=PTPRF PE=1 SV=2
P47755	44	8	5	Carbamidomethylation; Acetylation (Protein N-term)	1372100	522600	222880	32949	F-actin-capping protein subunit alpha-2 OS=Homo sapiens OX=9606 GN=CAPZA2 PE=1 SV=3
Q99873	43	11	11	Carbamidomethylation	568930	198740	307770	42462	Protein arginine N-methyltransferase 1 OS=Homo sapiens OX=9606 GN=PRMT1 PE=1 SV=3
P00441	69	7	7	Carbamidomethylation	8097000	2704600	3214400	15936	Superoxide dismutase [Cu-Zn] OS=Homo sapiens OX=9606 GN=SOD1 PE=1 SV=2
Q9NYK5	29	9	9		118460	496140	943090	38712	39S ribosomal protein L39 mitochondrial OS=Homo sapiens OX=9606 GN=MRPL39 PE=1 SV=3
Q14019	58	7	7	Carbamidomethylation	1370100	630020	3581300	15945	Coactosin-like protein OS=Homo sapiens OX=9606 GN=COTL1 PE=1 SV=3
P63092	34	12	10		69102	957650	794110	45665	Guanine nucleotide-binding protein G(s) subunit alpha isoforms short OS=Homo sapiens OX=9606 GN=GNAS PE=1 SV=1
Q5JWF2	13	12	10		69102	957650	794110	111024	Guanine nucleotide-binding protein G(s) subunit alpha isoforms XLas OS=Homo sapiens OX=9606 GN=GNAS PE=1 SV=2
P09012	40	9	7	Acetylation (Protein N-term)	674940	938760	477910	31280	U1 small nuclear ribonucleoprotein A OS=Homo sapiens OX=9606 GN=SNRPA PE=1 SV=3
P20645	26	5	5		43630	443060	501540	30993	Cation-dependent mannose-6-phosphate receptor OS=Homo sapiens OX=9606 GN=M6PR PE=1 SV=1
Q02543	47	14	14	Carbamidomethylation	740990	2651700	6758300	20762	60S ribosomal protein L18a OS=Homo sapiens OX=9606 GN=RPL18A PE=1 SV=2
Q5VT79	22	5	5	Carbamidomethylation	681160	124000	349550	36879	Annexin A8-like protein 1 OS=Homo sapiens OX=9606 GN=ANXA8L1 PE=2 SV=2
P52815	34	7	7	Oxidation (M)	2715600	1668700	1262500	21348	39S ribosomal protein L12 mitochondrial OS=Homo sapiens OX=9606 GN=MRPL12 PE=1 SV=2
P61923	44	6	6	Oxidation (M); Acetylation (Protein N-term)	1321900	664290	281400	20198	Coatomer subunit zeta-1 OS=Homo sapiens OX=9606 GN=COPZ1 PE=1 SV=1
Q63HN8	2	8	8		1021700	136290	882700	591415	E3 ubiquitin-protein ligase RNF213 OS=Homo sapiens OX=9606 GN=RNF213 PE=1 SV=3
Q93009	16	10	10	Carbamidomethylation; Oxidation (M)	2657600	152110	1396800	128302	Ubiquitin carboxyl-terminal hydrolase 7 OS=Homo sapiens OX=9606 GN=USP7 PE=1 SV=2
P07919	67	5	5	Carbamidomethylation	1428200	641030	72583	10739	Cytochrome b-c1 complex subunit 6 mitochondrial OS=Homo sapiens OX=9606 GN=UQCRH PE=1 SV=2
Q15843	69	7	7		2810500	995170	3659200	9072	NEDD8 OS=Homo sapiens OX=9606 GN=NEDD8 PE=1 SV=1
Q9ULC4	52	6	6	Carbamidomethylation	323310	259730	199590	20555	Malignant T-cell-amplified sequence 1 OS=Homo sapiens OX=9606 GN=MCTS1 PE=1 SV=1
Q07960	23	7	7	Carbamidomethylation	633160	176950	929660	50436	Rho GTPase-activating protein 1 OS=Homo sapiens OX=9606 GN=ARHGAP1 PE=1 SV=1
Q9Y6B6	54	8	4	Carbamidomethylation	129220	21819	24178	22410	GTP-binding protein SAR1b OS=Homo sapiens OX=9606 GN=SAR1B PE=1 SV=1
Q9Y3D9	35	6	6		219630	1244100	100520	21771	28S ribosomal protein S23 mitochondrial OS=Homo sapiens OX=9606 GN=MRPS23 PE=1 SV=2
Q5T6F2	13	8	8	Carbamidomethylation; Acetylation (Protein N-term)	675210	311920	239710	117115	Ubiquitin-associated protein 2 OS=Homo sapiens OX=9606 GN=UBAP2 PE=1 SV=1
Q9NQR4	52	9	9	Carbamidomethylation	297540	260590	686400	30608	Omega-amidase NIT2 OS=Homo sapiens OX=9606 GN=NIT2 PE=1 SV=1
Q8NBJ4	15	5	5		1515700	4324500	850870	45333	Golgi membrane protein 1 OS=Homo sapiens OX=9606 GN=GOLM1 PE=1 SV=1
P46778	39	11	11	Oxidation (M)	1524200	1253000	2035600	18565	60S ribosomal protein L21 OS=Homo sapiens OX=9606 GN=RPL21 PE=1 SV=2
P25815	39	6	6		37652	454660	379790	10400	Protein S100-P OS=Homo sapiens OX=9606 GN=S100P PE=1 SV=2
P63162	25	7	7	Carbamidomethylation	194980	877790	2264600	24614	Small nuclear ribonucleoprotein-associated protein N OS=Homo sapiens OX=9606 GN=SNRPN PE=1 SV=1
P14678	25	7	7	Carbamidomethylation	194980	877790	2264600	24610	Small nuclear ribonucleoprotein-associated proteins B and B' OS=Homo sapiens OX=9606 GN=SNRPB PE=1 SV=2
Q92542	11	5	5		500840	814430	199930	78411	Nicastrin OS=Homo sapiens OX=9606 GN=NCSTN PE=1 SV=2
P35244	79	7	7	Carbamidomethylation; Oxidation (M); Acetylation (Protein N-term)	1354800	466860	1235600	13569	Replication protein A 14 kDa subunit OS=Homo sapiens OX=9606 GN=RPA3 PE=1 SV=1
Q7Z3K3	14	10	10		570530	306260	794430	155343	Pogo transposable element with ZNF domain OS=Homo sapiens OX=9606 GN=POGZ PE=1 SV=2
Q9Y696	58	10	9	Carbamidomethylation; Oxidation (M); Acetylation (Protein N-term)	918380	422530	278760	28772	Chloride intracellular channel protein 4 OS=Homo sapiens OX=9606 GN=CLIC4 PE=1 SV=4
Q15738	40	10	10	Carbamidomethylation; Acetylation (Protein N-term)	1725600	1035400	475670	41900	Sterol-4-alpha-carboxylate 3-dehydrogenase decarboxylating OS=Homo sapiens OX=9606 GN=NSDHL PE=1 SV=2
O00151	64	11	11	Carbamidomethylation; Oxidation (M); Acetylation (Protein N-term)	1198800	401480	337590	36072	PDZ and LIM domain protein 1 OS=Homo sapiens OX=9606 GN=PDLIM1 PE=1 SV=4
Q00059	40	10	10		409810	2998800	1359800	29097	Transcription factor A mitochondrial OS=Homo sapiens OX=9606 GN=TFAM PE=1 SV=1
Q86VM9	17	7	7		36628	419780	78891	106379	Zinc finger CCCH domain-containing protein 18 OS=Homo sapiens OX=9606 GN=ZC3H18 PE=1 SV=2
P30740	32	9	8	Acetylation (Protein N-term)	976720	184550	535680	42742	Leukocyte elastase inhibitor OS=Homo sapiens OX=9606 GN=SERPINB1 PE=1 SV=1
P13073	52	10	10		464100	1717900	955640	19577	Cytochrome c oxidase subunit 4 isoform 1 mitochondrial OS=Homo sapiens OX=9606 GN=COX4I1 PE=1 SV=1
P14927	50	6	5		258570	208730	280520	13530	Cytochrome b-c1 complex subunit 7 OS=Homo sapiens OX=9606 GN=UQCRB PE=1 SV=2
P02774	12	6	6	Carbamidomethylation	5547600	2790400	957380	52918	Vitamin D-binding protein OS=Homo sapiens OX=9606 GN=GC PE=1 SV=2
Q14764	19	9	9		739810	300270	193940	99327	Major vault protein OS=Homo sapiens OX=9606 GN=MVP PE=1 SV=4
Q8IYB8	10	6	6	Carbamidomethylation	1466300	211760	331760	87991	ATP-dependent RNA helicase SUPV3L1 mitochondrial OS=Homo sapiens OX=9606 GN=SUPV3L1 PE=1 SV=1
O14744	33	14	14		1806900	324010	3030600	72684	Protein arginine N-methyltransferase 5 OS=Homo sapiens OX=9606 GN=PRMT5 PE=1 SV=4
Q13492	22	8	8		435320	150160	354840	70755	Phosphatidylinositol-binding clathrin assembly protein OS=Homo sapiens OX=9606 GN=PICALM PE=1 SV=2
Q1ED39	32	11	11		877500	2187800	1644300	51589	Lysine-rich nucleolar protein 1 OS=Homo sapiens OX=9606 GN=KNOP1 PE=1 SV=1
O96019	41	10	10	Carbamidomethylation; Acetylation (Protein N-term)	3539900	907970	769870	47461	Actin-like protein 6A OS=Homo sapiens OX=9606 GN=ACTL6A PE=1 SV=1
P01023	4	8	4	Oxidation (M)	119830	8349400	330710	163290	Alpha-2-macroglobulin OS=Homo sapiens OX=9606 GN=A2M PE=1 SV=3
Q9BTT0	19	4	4		1730700	552440	684600	30692	Acidic leucine-rich nuclear phosphoprotein 32 family member E OS=Homo sapiens OX=9606 GN=ANP32E PE=1 SV=1
Q13610	26	9	9		1872100	153560	282190	55828	Periodic tryptophan protein 1 homolog OS=Homo sapiens OX=9606 GN=PWP1 PE=1 SV=1
O75494	24	6	6		784150	589660	1503000	31301	Serine/arginine-rich splicing factor 10 OS=Homo sapiens OX=9606 GN=SRSF10 PE=1 SV=1
Q9BRX2	25	5	5		1954500	340650	563570	43359	Protein pelota homolog OS=Homo sapiens OX=9606 GN=PELO PE=1 SV=2
P07947	18	6	5		925350	578950	297740	60801	Tyrosine-protein kinase Yes OS=Homo sapiens OX=9606 GN=YES1 PE=1 SV=3
Q9UKM9	36	10	8	Acetylation (Protein N-term)	85728	688720	358260	32463	RNA-binding protein Raly OS=Homo sapiens OX=9606 GN=RALY PE=1 SV=1
Q6DKI1	29	7	7	Carbamidomethylation	464950	364550	169690	29669	60S ribosomal protein L7-like 1 OS=Homo sapiens OX=9606 GN=RPL7L1 PE=1 SV=2
Q8WUX1	15	6	6		37682	511030	2344000	51457	Sodium-coupled neutral amino acid transporter 5 OS=Homo sapiens OX=9606 GN=SLC38A5 PE=1 SV=1
O15427	22	9	9	Carbamidomethylation	22390	671860	331250	49469	Monocarboxylate transporter 4 OS=Homo sapiens OX=9606 GN=SLC16A3 PE=1 SV=1
Q9NX40	29	6	6	Carbamidomethylation; Oxidation (M)	481720	451560	1447900	27626	OCIA domain-containing protein 1 OS=Homo sapiens OX=9606 GN=OCIAD1 PE=1 SV=1
P07305	28	6	6	Acetylation (Protein N-term)	12281	85346	242990	20863	Histone H1.0 OS=Homo sapiens OX=9606 GN=H1-0 PE=1 SV=3
Q9H0D6	18	12	12		525970	302050	255020	108583	5'-3' exoribonuclease 2 OS=Homo sapiens OX=9606 GN=XRN2 PE=1 SV=1
Q9P287	39	8	8	Carbamidomethylation	1054600	213190	590840	35979	BRCA2 and CDKN1A-interacting protein OS=Homo sapiens OX=9606 GN=BCCIP PE=1 SV=1
Q13505	24	8	8		1801400	400860	339150	51463	Metaxin-1 OS=Homo sapiens OX=9606 GN=MTX1 PE=1 SV=3
O14745	40	10	10	Acetylation (Protein N-term)	149940	510760	405130	38868	Na(+)/H(+) exchange regulatory cofactor NHE-RF1 OS=Homo sapiens OX=9606 GN=SLC9A3R1 PE=1 SV=4
O96000	40	6	6		373750	288850	190350	20777	NADH dehydrogenase [ubiquinone] 1 beta subcomplex subunit 10 OS=Homo sapiens OX=9606 GN=NDUFB10 PE=1 SV=3
Q6NUQ4	19	9	9		3121600	1501600	1230800	77151	Transmembrane protein 214 OS=Homo sapiens OX=9606 GN=TMEM214 PE=1 SV=2
Q9H4A6	38	8	8	Carbamidomethylation; Oxidation (M)	2713800	744240	1220500	33811	Golgi phosphoprotein 3 OS=Homo sapiens OX=9606 GN=GOLPH3 PE=1 SV=1
O60502	8	5	5	Carbamidomethylation	66603	89675	180670	102915	Protein O-GlcNAcase OS=Homo sapiens OX=9606 GN=OGA PE=1 SV=2
P40429	38	13	13	Acetylation (Protein N-term)	398520	2121200	1880700	23577	60S ribosomal protein L13a OS=Homo sapiens OX=9606 GN=RPL13A PE=1 SV=2
Q9NRX4	69	6	6	Carbamidomethylation; Oxidation (M); Acetylation (Protein N-term)	819310	1116700	137470	13833	14 kDa phosphohistidine phosphatase OS=Homo sapiens OX=9606 GN=PHPT1 PE=1 SV=1
Q9BW92	12	6	6		1983400	806570	1037900	81036	Threonine--tRNA ligase mitochondrial OS=Homo sapiens OX=9606 GN=TARS2 PE=1 SV=1
Q9UMY1	21	5	5		79613	649070	202500	29426	Nucleolar protein 7 OS=Homo sapiens OX=9606 GN=NOL7 PE=1 SV=2
Q5SW79	12	12	12	Acetylation (Protein N-term)	92301	261880	1605000	175292	Centrosomal protein of 170 kDa OS=Homo sapiens OX=9606 GN=CEP170 PE=1 SV=1
Q14573	4	6	6		784060	359250	314320	304105	Inositol 1 4 5-trisphosphate receptor type 3 OS=Homo sapiens OX=9606 GN=ITPR3 PE=1 SV=2
Q93050	10	6	6		289870	2093900	666820	96413	V-type proton ATPase 116 kDa subunit a1 OS=Homo sapiens OX=9606 GN=ATP6V0A1 PE=1 SV=3
P20742	4	7	3	Carbamidomethylation; Oxidation (M)	1401400	1606600	404600	163862	Pregnancy zone protein OS=Homo sapiens OX=9606 GN=PZP PE=1 SV=4
Q15003	23	10	9	Carbamidomethylation	859630	819530	264540	82563	Condensin complex subunit 2 OS=Homo sapiens OX=9606 GN=NCAPH PE=1 SV=3
Q9NV31	45	6	6		2352900	529690	1977300	21850	U3 small nucleolar ribonucleoprotein protein IMP3 OS=Homo sapiens OX=9606 GN=IMP3 PE=1 SV=1
P00403	31	7	7	Oxidation (M)	302590	125620	713350	25565	Cytochrome c oxidase subunit 2 OS=Homo sapiens OX=9606 GN=MT-CO2 PE=1 SV=1
P84090	54	8	8	Carbamidomethylation; Acetylation (Protein N-term)	245380	1833400	1418400	12259	Enhancer of rudimentary homolog OS=Homo sapiens OX=9606 GN=ERH PE=1 SV=1
P42766	31	8	7		418480	1454600	2023500	14551	60S ribosomal protein L35 OS=Homo sapiens OX=9606 GN=RPL35 PE=1 SV=2
Q9NZ01	26	10	10	Carbamidomethylation	673220	2614300	1228900	36034	Very-long-chain enoyl-CoA reductase OS=Homo sapiens OX=9606 GN=TECR PE=1 SV=1
Q8WTV0	17	7	7		67673	769430	436350	60878	Scavenger receptor class B member 1 OS=Homo sapiens OX=9606 GN=SCARB1 PE=1 SV=1
P11047	7	7	7		366810	161020	667920	177602	Laminin subunit gamma-1 OS=Homo sapiens OX=9606 GN=LAMC1 PE=1 SV=3
Q13547	26	8	4		3247.9	33985	220130	55103	Histone deacetylase 1 OS=Homo sapiens OX=9606 GN=HDAC1 PE=1 SV=1
Q9Y6M9	49	6	6	Acetylation (Protein N-term)	1376900	639780	330990	21831	NADH dehydrogenase [ubiquinone] 1 beta subcomplex subunit 9 OS=Homo sapiens OX=9606 GN=NDUFB9 PE=1 SV=3
Q01469	71	7	7	Carbamidomethylation; Acetylation (Protein N-term)	483380	1148000	240450	15164	Fatty acid-binding protein 5 OS=Homo sapiens OX=9606 GN=FABP5 PE=1 SV=3
P62888	59	7	7	Carbamidomethylation	472140	3373800	1104000	12784	60S ribosomal protein L30 OS=Homo sapiens OX=9606 GN=RPL30 PE=1 SV=2
Q13619	21	12	9	Carbamidomethylation	150760	139150	788730	87680	Cullin-4A OS=Homo sapiens OX=9606 GN=CUL4A PE=1 SV=3
Q15599	19	5	5		0	171100	188920	37414	Na(+)/H(+) exchange regulatory cofactor NHE-RF2 OS=Homo sapiens OX=9606 GN=SLC9A3R2 PE=1 SV=2
P61020	42	7	4		7792.9	66459	77129	23707	Ras-related protein Rab-5B OS=Homo sapiens OX=9606 GN=RAB5B PE=1 SV=1
O75937	47	8	8	Acetylation (Protein N-term)	538800	564360	91778	29842	DnaJ homolog subfamily C member 8 OS=Homo sapiens OX=9606 GN=DNAJC8 PE=1 SV=2
Q15061	18	9	9		103400	347990	903160	74891	WD repeat-containing protein 43 OS=Homo sapiens OX=9606 GN=WDR43 PE=1 SV=3
P63173	53	5	5		773820	1415000	1662900	8218	60S ribosomal protein L38 OS=Homo sapiens OX=9606 GN=RPL38 PE=1 SV=2
Q9BRP8	63	7	7		282860	248540	248360	22656	Partner of Y14 and mago OS=Homo sapiens OX=9606 GN=PYM1 PE=1 SV=1
Q8NCG7	12	5	5		1009800	136990	2229000	73732	Diacylglycerol lipase-beta OS=Homo sapiens OX=9606 GN=DAGLB PE=1 SV=2
Q9H2W6	35	7	7		68779	266570	22835	31705	39S ribosomal protein L46 mitochondrial OS=Homo sapiens OX=9606 GN=MRPL46 PE=1 SV=1
Q9Y3U8	33	6	6	Carbamidomethylation; Oxidation (M)	453800	2788800	1672000	12254	60S ribosomal protein L36 OS=Homo sapiens OX=9606 GN=RPL36 PE=1 SV=3
Q9NR45	30	7	7	Oxidation (M)	1368500	330540	123610	40308	Sialic acid synthase OS=Homo sapiens OX=9606 GN=NANS PE=1 SV=2
Q9H9T3	14	6	6		929770	581700	435340	62259	Elongator complex protein 3 OS=Homo sapiens OX=9606 GN=ELP3 PE=1 SV=2
Q6IAA8	65	7	7		1825000	803900	415340	17745	Ragulator complex protein LAMTOR1 OS=Homo sapiens OX=9606 GN=LAMTOR1 PE=1 SV=2
Q6P1J9	22	9	9	Carbamidomethylation	139820	322350	494230	60577	Parafibromin OS=Homo sapiens OX=9606 GN=CDC73 PE=1 SV=1
Q96QD8	9	4	4		803920	125630	148370	56026	Sodium-coupled neutral amino acid transporter 2 OS=Homo sapiens OX=9606 GN=SLC38A2 PE=1 SV=2
Q9Y263	10	6	6	Carbamidomethylation	436870	166740	47104	87157	Phospholipase A-2-activating protein OS=Homo sapiens OX=9606 GN=PLAA PE=1 SV=2
Q9H7B2	32	9	9		223530	957760	357410	35583	Ribosome production factor 2 homolog OS=Homo sapiens OX=9606 GN=RPF2 PE=1 SV=2
P62070	32	5	5		50711	2403800	661340	23400	Ras-related protein R-Ras2 OS=Homo sapiens OX=9606 GN=RRAS2 PE=1 SV=1
P16930	17	5	5	Acetylation (Protein N-term)	587410	129050	222000	46374	Fumarylacetoacetase OS=Homo sapiens OX=9606 GN=FAH PE=1 SV=2
P63000	45	9	4	Carbamidomethylation	69552	318210	778450	21450	Ras-related C3 botulinum toxin substrate 1 OS=Homo sapiens OX=9606 GN=RAC1 PE=1 SV=1
Q9UPQ0	7	5	5	Carbamidomethylation; Acetylation (Protein N-term)	1459300	835140	507310	121867	LIM and calponin homology domains-containing protein 1 OS=Homo sapiens OX=9606 GN=LIMCH1 PE=1 SV=4
Q8WU90	28	9	9		664950	396180	1374400	48603	Zinc finger CCCH domain-containing protein 15 OS=Homo sapiens OX=9606 GN=ZC3H15 PE=1 SV=1
O60869	50	8	8	Acetylation (Protein N-term)	477820	1149000	629190	16369	Endothelial differentiation-related factor 1 OS=Homo sapiens OX=9606 GN=EDF1 PE=1 SV=1
Q8N3U4	8	5	5		3937100	392810	450180	141326	Cohesin subunit SA-2 OS=Homo sapiens OX=9606 GN=STAG2 PE=1 SV=3
P21281	33	10	10	Carbamidomethylation	548630	283330	3033100	56501	V-type proton ATPase subunit B brain isoform OS=Homo sapiens OX=9606 GN=ATP6V1B2 PE=1 SV=3
P21912	41	11	11	Carbamidomethylation	497880	1997300	639750	31630	Succinate dehydrogenase [ubiquinone] iron-sulfur subunit mitochondrial OS=Homo sapiens OX=9606 GN=SDHB PE=1 SV=3
O15511	62	5	5	Carbamidomethylation	730950	646600	261790	16320	Actin-related protein 2/3 complex subunit 5 OS=Homo sapiens OX=9606 GN=ARPC5 PE=1 SV=3
P62851	31	6	6		223770	2517300	1651000	13742	40S ribosomal protein S25 OS=Homo sapiens OX=9606 GN=RPS25 PE=1 SV=1
Q8NHH9	13	5	5		5700700	1395000	28682	66229	Atlastin-2 OS=Homo sapiens OX=9606 GN=ATL2 PE=1 SV=2
P26447	49	9	9	Oxidation (M)	256710	2346200	2244200	11729	Protein S100-A4 OS=Homo sapiens OX=9606 GN=S100A4 PE=1 SV=1
P13987	37	5	5	Carbamidomethylation	146840	3430700	489360	14177	CD59 glycoprotein OS=Homo sapiens OX=9606 GN=CD59 PE=1 SV=1
Q9Y221	54	6	6		1089500	303640	353980	20463	60S ribosome subunit biogenesis protein NIP7 homolog OS=Homo sapiens OX=9606 GN=NIP7 PE=1 SV=1
O75964	48	5	5		261800	875620	780390	11428	ATP synthase subunit g mitochondrial OS=Homo sapiens OX=9606 GN=ATP5MG PE=1 SV=3
P61011	23	8	8		3300600	404070	641530	55705	Signal recognition particle 54 kDa protein OS=Homo sapiens OX=9606 GN=SRP54 PE=1 SV=1
Q08379	11	8	8	Carbamidomethylation	587070	80265	272840	113086	Golgin subfamily A member 2 OS=Homo sapiens OX=9606 GN=GOLGA2 PE=1 SV=3
Q9BYD1	45	7	7		666560	890400	304550	20692	39S ribosomal protein L13 mitochondrial OS=Homo sapiens OX=9606 GN=MRPL13 PE=1 SV=1
P60903	45	5	5	Oxidation (M)	3006200	2472400	2860400	11203	Protein S100-A10 OS=Homo sapiens OX=9606 GN=S100A10 PE=1 SV=2
P81605	56	9	9	Carbamidomethylation	3284600	2759000	515400	11284	Dermcidin OS=Homo sapiens OX=9606 GN=DCD PE=1 SV=2
O75821	47	10	10	Carbamidomethylation	1048000	377700	1057200	35611	Eukaryotic translation initiation factor 3 subunit G OS=Homo sapiens OX=9606 GN=EIF3G PE=1 SV=2
Q03169	10	4	4		172320	32438	936660	72661	Tumor necrosis factor alpha-induced protein 2 OS=Homo sapiens OX=9606 GN=TNFAIP2 PE=1 SV=2
Q9Y3A5	43	9	9	Carbamidomethylation	824480	566750	738700	28764	Ribosome maturation protein SBDS OS=Homo sapiens OX=9606 GN=SBDS PE=1 SV=4
P83731	39	8	8	Carbamidomethylation; Oxidation (M)	633120	1973200	2800700	17779	60S ribosomal protein L24 OS=Homo sapiens OX=9606 GN=RPL24 PE=1 SV=1
Q9UM00	19	4	4		434070	247720	1466700	27079	Calcium load-activated calcium channel OS=Homo sapiens OX=9606 GN=TMCO1 PE=1 SV=2
Q9Y697	28	9	9		2093700	38335	4585400	50196	Cysteine desulfurase mitochondrial OS=Homo sapiens OX=9606 GN=NFS1 PE=1 SV=3
Q9HB07	21	7	7		575370	811480	501280	42477	MYG1 exonuclease OS=Homo sapiens OX=9606 GN=MYG1 PE=1 SV=3
Q16851	24	8	8		1494600	323830	441180	56940	UTP--glucose-1-phosphate uridylyltransferase OS=Homo sapiens OX=9606 GN=UGP2 PE=1 SV=5
P62857	39	4	4	Oxidation (M)	1120800	3245700	1198000	7841	40S ribosomal protein S28 OS=Homo sapiens OX=9606 GN=RPS28 PE=1 SV=1
P24844	51	6	2	Carbamidomethylation	338850	106480	0	19827	Myosin regulatory light polypeptide 9 OS=Homo sapiens OX=9606 GN=MYL9 PE=1 SV=4
P30049	58	5	5		994320	1278300	227950	17490	ATP synthase subunit delta mitochondrial OS=Homo sapiens OX=9606 GN=ATP5F1D PE=1 SV=2
Q15126	29	6	6	Carbamidomethylation	426280	88697	234060	21995	Phosphomevalonate kinase OS=Homo sapiens OX=9606 GN=PMVK PE=1 SV=3
Q9NZL4	20	6	6	Carbamidomethylation	113820	13243	400070	39303	Hsp70-binding protein 1 OS=Homo sapiens OX=9606 GN=HSPBP1 PE=1 SV=2
Q9NRX1	28	4	4		100730	12954	752550	27924	RNA-binding protein PNO1 OS=Homo sapiens OX=9606 GN=PNO1 PE=1 SV=1
Q15437	9	5	3	Carbamidomethylation; Oxidation (M)	182730	69653	175360	86479	Protein transport protein Sec23B OS=Homo sapiens OX=9606 GN=SEC23B PE=1 SV=2
Q99622	39	3	3	Carbamidomethylation	1141900	236300	159280	13178	Protein C10 OS=Homo sapiens OX=9606 GN=C12orf57 PE=1 SV=1
Q5M775	16	9	9	Carbamidomethylation	1066500	1039300	143210	118585	Cytospin-B OS=Homo sapiens OX=9606 GN=SPECC1 PE=1 SV=1
Q969H8	27	4	4		179330	2089900	570720	18795	Myeloid-derived growth factor OS=Homo sapiens OX=9606 GN=MYDGF PE=1 SV=1
O75607	29	3	3	Carbamidomethylation; Acetylation (Protein N-term)	1222300	208780	163240	19344	Nucleoplasmin-3 OS=Homo sapiens OX=9606 GN=NPM3 PE=1 SV=3
Q14165	35	7	7		95642	1130800	483820	32234	Malectin OS=Homo sapiens OX=9606 GN=MLEC PE=1 SV=1
P69905	35	4	4		879840	3869800	1467900	15258	Hemoglobin subunit alpha OS=Homo sapiens OX=9606 GN=HBA1 PE=1 SV=2
P17096	41	5	5		524000	862010	1022600	11676	High mobility group protein HMG-I/HMG-Y OS=Homo sapiens OX=9606 GN=HMGA1 PE=1 SV=3
O95758	32	9	6		6090300	523450	789490	59690	Polypyrimidine tract-binding protein 3 OS=Homo sapiens OX=9606 GN=PTBP3 PE=1 SV=2
Q9NRF9	44	4	4	Carbamidomethylation; Acetylation (Protein N-term)	255750	489570	495250	16860	DNA polymerase epsilon subunit 3 OS=Homo sapiens OX=9606 GN=POLE3 PE=1 SV=1
Q6ZXV5	12	7	7		3614500	981150	405050	104009	Protein O-mannosyl-transferase TMTC3 OS=Homo sapiens OX=9606 GN=TMTC3 PE=1 SV=2
Q9BRZ2	11	5	5		790400	68467	235220	81488	E3 ubiquitin-protein ligase TRIM56 OS=Homo sapiens OX=9606 GN=TRIM56 PE=1 SV=3
P09496	27	8	8		535930	1888000	382110	27077	Clathrin light chain A OS=Homo sapiens OX=9606 GN=CLTA PE=1 SV=1
P02795	67	4	4	Carbamidomethylation; Acetylation (Protein N-term)	0	344600	39830	6042	Metallothionein-2 OS=Homo sapiens OX=9606 GN=MT2A PE=1 SV=1
P40261	30	6	6	Carbamidomethylation	146090	953540	271250	29574	Nicotinamide N-methyltransferase OS=Homo sapiens OX=9606 GN=NNMT PE=1 SV=1
Q9C0J8	5	5	5		26790	1369100	441030	145891	pre-mRNA 3' end processing protein WDR33 OS=Homo sapiens OX=9606 GN=WDR33 PE=1 SV=2
Q16850	19	7	7		44094	307660	630240	56806	Lanosterol 14-alpha demethylase OS=Homo sapiens OX=9606 GN=CYP51A1 PE=1 SV=3
P63313	64	3	3	Oxidation (M); Acetylation (Protein N-term)	1312100	6281900	1614200	5026	Thymosin beta-10 OS=Homo sapiens OX=9606 GN=TMSB10 PE=1 SV=2
Q9P0J0	37	5	5		210680	620600	264910	16698	NADH dehydrogenase [ubiquinone] 1 alpha subcomplex subunit 13 OS=Homo sapiens OX=9606 GN=NDUFA13 PE=1 SV=3
Q9Y3B9	18	6	6		12763	693360	660700	31484	RRP15-like protein OS=Homo sapiens OX=9606 GN=RRP15 PE=1 SV=2
P29144	12	6	6	Carbamidomethylation	323230	106710	107530	138350	Tripeptidyl-peptidase 2 OS=Homo sapiens OX=9606 GN=TPP2 PE=1 SV=4
P20962	70	5	5		879210	2420400	157660	11530	Parathymosin OS=Homo sapiens OX=9606 GN=PTMS PE=1 SV=2
P02788	8	6	4	Carbamidomethylation	2873400	9410700	1357500	78182	Lactotransferrin OS=Homo sapiens OX=9606 GN=LTF PE=1 SV=6
Q16666	14	8	8		2070700	1059600	590770	88256	Gamma-interferon-inducible protein 16 OS=Homo sapiens OX=9606 GN=IFI16 PE=1 SV=3
Q16222	8	3	2		11225	9647.1	502460	58769	UDP-N-acetylhexosamine pyrophosphorylase OS=Homo sapiens OX=9606 GN=UAP1 PE=1 SV=3
Q96JB5	21	7	7	Acetylation (Protein N-term)	368690	118380	202630	56921	CDK5 regulatory subunit-associated protein 3 OS=Homo sapiens OX=9606 GN=CDK5RAP3 PE=1 SV=2
P11166	8	5	5		66881	167370	197170	54084	Solute carrier family 2 facilitated glucose transporter member 1 OS=Homo sapiens OX=9606 GN=SLC2A1 PE=1 SV=2
Q13451	15	5	5		627880	291700	144670	51212	Peptidyl-prolyl cis-trans isomerase FKBP5 OS=Homo sapiens OX=9606 GN=FKBP5 PE=1 SV=2
P78417	29	6	6		133300	1279600	1053800	27566	Glutathione S-transferase omega-1 OS=Homo sapiens OX=9606 GN=GSTO1 PE=1 SV=2
P62314	38	4	4		78016	49897	299250	13282	Small nuclear ribonucleoprotein Sm D1 OS=Homo sapiens OX=9606 GN=SNRPD1 PE=1 SV=1
Q92820	20	5	5		327380	63822	124720	35964	Gamma-glutamyl hydrolase OS=Homo sapiens OX=9606 GN=GGH PE=1 SV=2
Q9UGP8	19	9	9		1387100	523900	595070	87997	Translocation protein SEC63 homolog OS=Homo sapiens OX=9606 GN=SEC63 PE=1 SV=2
Q9BRJ6	36	5	5		45899	449850	1142	22083	Uncharacterized protein C7orf50 OS=Homo sapiens OX=9606 GN=C7orf50 PE=1 SV=1
Q9H089	12	6	6		155550	1089500	516400	75225	Large subunit GTPase 1 homolog OS=Homo sapiens OX=9606 GN=LSG1 PE=1 SV=2
Q6ZRV2	5	3	3		409780	80357	130340	127122	Protein FAM83H OS=Homo sapiens OX=9606 GN=FAM83H PE=1 SV=3
Q14008	6	10	10		634120	274510	622170	225493	Cytoskeleton-associated protein 5 OS=Homo sapiens OX=9606 GN=CKAP5 PE=1 SV=3
Q15287	22	5	5		187930	233850	155030	34208	RNA-binding protein with serine-rich domain 1 OS=Homo sapiens OX=9606 GN=RNPS1 PE=1 SV=1
Q99757	50	4	4	Carbamidomethylation; Oxidation (M)	517100	218850	90584	18383	Thioredoxin mitochondrial OS=Homo sapiens OX=9606 GN=TXN2 PE=1 SV=2
O15260	21	4	4	Carbamidomethylation; Oxidation (M)	1660500	353290	441820	30394	Surfeit locus protein 4 OS=Homo sapiens OX=9606 GN=SURF4 PE=1 SV=3
Q96AQ6	12	6	6		414050	46101	120410	80643	Pre-B-cell leukemia transcription factor-interacting protein 1 OS=Homo sapiens OX=9606 GN=PBXIP1 PE=1 SV=1
Q9NQP4	28	3	3		383120	304600	511130	15314	Prefoldin subunit 4 OS=Homo sapiens OX=9606 GN=PFDN4 PE=1 SV=1
Q9BYN8	23	5	5		38654	405270	228440	24212	28S ribosomal protein S26 mitochondrial OS=Homo sapiens OX=9606 GN=MRPS26 PE=1 SV=1
P56556	40	4	4		1277700	1333300	215750	15137	NADH dehydrogenase [ubiquinone] 1 alpha subcomplex subunit 6 OS=Homo sapiens OX=9606 GN=NDUFA6 PE=1 SV=4
Q15022	14	7	7		698860	354780	364160	83055	Polycomb protein SUZ12 OS=Homo sapiens OX=9606 GN=SUZ12 PE=1 SV=3
O75347	56	6	6		585540	2207900	798490	12855	Tubulin-specific chaperone A OS=Homo sapiens OX=9606 GN=TBCA PE=1 SV=3
Q9H2J4	26	4	4	Carbamidomethylation	561190	52919	606490	27614	Phosducin-like protein 3 OS=Homo sapiens OX=9606 GN=PDCL3 PE=1 SV=1
O75818	14	4	4		2952100	446280	744070	41834	Ribonuclease P protein subunit p40 OS=Homo sapiens OX=9606 GN=RPP40 PE=1 SV=3
P62318	48	4	4	Carbamidomethylation	336670	420270	853580	13916	Small nuclear ribonucleoprotein Sm D3 OS=Homo sapiens OX=9606 GN=SNRPD3 PE=1 SV=1
P78310	24	5	5		4550200	844400	351370	40030	Coxsackievirus and adenovirus receptor OS=Homo sapiens OX=9606 GN=CXADR PE=1 SV=1
Q8NFF5	13	4	4		91082	0	17450	65266	FAD synthase OS=Homo sapiens OX=9606 GN=FLAD1 PE=1 SV=1
P55268	5	5	5		1306600	118470	776330	195980	Laminin subunit beta-2 OS=Homo sapiens OX=9606 GN=LAMB2 PE=1 SV=2
Q68CQ4	12	6	6		364890	118210	439940	87055	U3 small nucleolar RNA-associated protein 25 homolog OS=Homo sapiens OX=9606 GN=UTP25 PE=1 SV=2
P02765	6	4	4	Carbamidomethylation	207960	16895000	3137400	39341	Alpha-2-HS-glycoprotein OS=Homo sapiens OX=9606 GN=AHSG PE=1 SV=2
Q9GZR2	23	6	6		3140600	711410	21823	46672	RNA exonuclease 4 OS=Homo sapiens OX=9606 GN=REXO4 PE=1 SV=2
P12955	15	4	4	Carbamidomethylation	185640	29640	259730	54548	Xaa-Pro dipeptidase OS=Homo sapiens OX=9606 GN=PEPD PE=1 SV=3
Q8WX92	14	4	4		146180	0	516880	65697	Negative elongation factor B OS=Homo sapiens OX=9606 GN=NELFB PE=1 SV=1
Q9BYD2	25	5	5		663100	2125200	337010	30243	39S ribosomal protein L9 mitochondrial OS=Homo sapiens OX=9606 GN=MRPL9 PE=1 SV=2
Q96D46	18	6	6	Carbamidomethylation	108620	510970	746600	57603	60S ribosomal export protein NMD3 OS=Homo sapiens OX=9606 GN=NMD3 PE=1 SV=1
Q96A26	40	7	7		323560	784000	259020	17342	Protein FAM162A OS=Homo sapiens OX=9606 GN=FAM162A PE=1 SV=2
P09669	51	7	7		29802	219850	482670	8781	Cytochrome c oxidase subunit 6C OS=Homo sapiens OX=9606 GN=COX6C PE=1 SV=2
Q9NP79	19	3	3	Carbamidomethylation; Acetylation (Protein N-term)	777730	191220	58301	33879	Vacuolar protein sorting-associated protein VTA1 homolog OS=Homo sapiens OX=9606 GN=VTA1 PE=1 SV=1
Q9Y512	35	10	10	Carbamidomethylation	878820	571230	129000	51976	Sorting and assembly machinery component 50 homolog OS=Homo sapiens OX=9606 GN=SAMM50 PE=1 SV=3
Q15428	24	8	8	Carbamidomethylation; Oxidation (M)	1180600	218240	346940	49256	Splicing factor 3A subunit 2 OS=Homo sapiens OX=9606 GN=SF3A2 PE=1 SV=2
P49585	22	5	5		2400800	548470	172960	41731	Choline-phosphate cytidylyltransferase A OS=Homo sapiens OX=9606 GN=PCYT1A PE=1 SV=2
O75880	20	4	4		30973	576800	1106200	33814	Protein SCO1 homolog mitochondrial OS=Homo sapiens OX=9606 GN=SCO1 PE=1 SV=1
P42677	65	6	3	Carbamidomethylation; Oxidation (M)	91260	1156500	246910	9461	40S ribosomal protein S27 OS=Homo sapiens OX=9606 GN=RPS27 PE=1 SV=3
Q6WKZ4	9	7	7		461880	303660	635930	137167	Rab11 family-interacting protein 1 OS=Homo sapiens OX=9606 GN=RAB11FIP1 PE=1 SV=3
Q8TCT9	15	5	5		252090	505860	233740	41488	Minor histocompatibility antigen H13 OS=Homo sapiens OX=9606 GN=HM13 PE=1 SV=1
P57088	22	6	6	Carbamidomethylation	201050	281770	711130	27978	Transmembrane protein 33 OS=Homo sapiens OX=9606 GN=TMEM33 PE=1 SV=2
Q8N3E9	13	5	5		665510	335400	1127100	89258	1-phosphatidylinositol 4 5-bisphosphate phosphodiesterase delta-3 OS=Homo sapiens OX=9606 GN=PLCD3 PE=1 SV=3
Q9H1I8	8	4	4		326690	1335100	54323	86360	Activating signal cointegrator 1 complex subunit 2 OS=Homo sapiens OX=9606 GN=ASCC2 PE=1 SV=3
Q8NAV1	41	7	7	Carbamidomethylation	1997900	277440	3720500	37477	Pre-mRNA-splicing factor 38A OS=Homo sapiens OX=9606 GN=PRPF38A PE=1 SV=1
P35573	5	4	4		283850	26909	110630	174763	Glycogen debranching enzyme OS=Homo sapiens OX=9606 GN=AGL PE=1 SV=3
P52943	46	4	4	Carbamidomethylation	1499600	397890	72359	22493	Cysteine-rich protein 2 OS=Homo sapiens OX=9606 GN=CRIP2 PE=1 SV=1
O14561	30	6	6	Carbamidomethylation; Oxidation (M)	494060	2512100	1719900	17417	Acyl carrier protein mitochondrial OS=Homo sapiens OX=9606 GN=NDUFAB1 PE=1 SV=3
Q9UNS2	28	7	7	Carbamidomethylation; Oxidation (M); Acetylation (Protein N-term)	930940	208580	3393800	47873	COP9 signalosome complex subunit 3 OS=Homo sapiens OX=9606 GN=COPS3 PE=1 SV=3
Q9Y4P3	17	5	5		5627.8	230830	304240	49798	Transducin beta-like protein 2 OS=Homo sapiens OX=9606 GN=TBL2 PE=1 SV=1
Q99439	17	4	3		555470	117600	872120	33697	Calponin-2 OS=Homo sapiens OX=9606 GN=CNN2 PE=1 SV=4
P07384	11	4	4		7782700	1735900	1757000	81890	Calpain-1 catalytic subunit OS=Homo sapiens OX=9606 GN=CAPN1 PE=1 SV=1
Q9Y2P8	22	7	7		80192	253090	249590	40843	RNA 3'-terminal phosphate cyclase-like protein OS=Homo sapiens OX=9606 GN=RCL1 PE=1 SV=3
Q10589	13	3	3		243870	2211700	1314200	19769	Bone marrow stromal antigen 2 OS=Homo sapiens OX=9606 GN=BST2 PE=1 SV=1
Q99417	56	4	4		737200	320440	118740	11967	c-Myc-binding protein OS=Homo sapiens OX=9606 GN=MYCBP PE=1 SV=3
O00483	47	4	4	Carbamidomethylation	72101	184140	410780	9370	Cytochrome c oxidase subunit NDUFA4 OS=Homo sapiens OX=9606 GN=NDUFA4 PE=1 SV=1
Q9UJA5	19	6	6		872950	1002700	208770	55799	tRNA (adenine(58)-N(1))-methyltransferase non-catalytic subunit TRM6 OS=Homo sapiens OX=9606 GN=TRMT6 PE=1 SV=1
Q9P000	14	2	2	Acetylation (Protein N-term)	434500	36781	117700	21819	COMM domain-containing protein 9 OS=Homo sapiens OX=9606 GN=COMMD9 PE=1 SV=2
Q9HAV7	38	7	7		375020	801480	153560	24279	GrpE protein homolog 1 mitochondrial OS=Homo sapiens OX=9606 GN=GRPEL1 PE=1 SV=2
Q9BTY7	20	4	4		233030	18816	543160	42129	Protein HGH1 homolog OS=Homo sapiens OX=9606 GN=HGH1 PE=1 SV=1
P48556	15	4	4		711820	141930	382400	39612	26S proteasome non-ATPase regulatory subunit 8 OS=Homo sapiens OX=9606 GN=PSMD8 PE=1 SV=2
Q14011	38	4	4		691970	394320	2618600	18648	Cold-inducible RNA-binding protein OS=Homo sapiens OX=9606 GN=CIRBP PE=1 SV=1
P19823	4	4	4		4297000	1783100	818310	106463	Inter-alpha-trypsin inhibitor heavy chain H2 OS=Homo sapiens OX=9606 GN=ITIH2 PE=1 SV=2
P82909	58	5	5		3823700	103530	607940	11466	28S ribosomal protein S36 mitochondrial OS=Homo sapiens OX=9606 GN=MRPS36 PE=1 SV=2
Q9NRX2	32	5	5		18535	110650	285910	20050	39S ribosomal protein L17 mitochondrial OS=Homo sapiens OX=9606 GN=MRPL17 PE=1 SV=1
P43307	21	4	4		1617900	1063900	620580	32235	Translocon-associated protein subunit alpha OS=Homo sapiens OX=9606 GN=SSR1 PE=1 SV=3
Q96IX5	45	4	4		146190	1093700	505030	6458	ATP synthase membrane subunit K mitochondrial OS=Homo sapiens OX=9606 GN=ATP5MK PE=1 SV=1
Q9NR50	20	5	5	Acetylation (Protein N-term)	660630	755710	452050	50240	Translation initiation factor eIF-2B subunit gamma OS=Homo sapiens OX=9606 GN=EIF2B3 PE=1 SV=1
Q9NWT1	10	3	3		62773	192340	349130	43964	p21-activated protein kinase-interacting protein 1 OS=Homo sapiens OX=9606 GN=PAK1IP1 PE=1 SV=2
Q9Y6M7	6	4	4		1441900	300650	60283	136044	Sodium bicarbonate cotransporter 3 OS=Homo sapiens OX=9606 GN=SLC4A7 PE=1 SV=2
P62861	20	4	4		284690	856750	2183100	6648	40S ribosomal protein S30 OS=Homo sapiens OX=9606 GN=FAU PE=1 SV=1
Q9H8V3	7	4	4		3722200	412520	66018	103505	Protein ECT2 OS=Homo sapiens OX=9606 GN=ECT2 PE=1 SV=4
Q99933	11	2	2		634880	73231	341980	38779	BAG family molecular chaperone regulator 1 OS=Homo sapiens OX=9606 GN=BAG1 PE=1 SV=4
P61513	41	3	3	Carbamidomethylation	0	190210	228340	10275	60S ribosomal protein L37a OS=Homo sapiens OX=9606 GN=RPL37A PE=1 SV=2
Q9Y3E0	11	2	2		106880	16719	343490	15426	Vesicle transport protein GOT1B OS=Homo sapiens OX=9606 GN=GOLT1B PE=1 SV=1
P62304	52	3	3	Carbamidomethylation; Oxidation (M)	893810	485120	2538000	10804	Small nuclear ribonucleoprotein E OS=Homo sapiens OX=9606 GN=SNRPE PE=1 SV=1
Q15125	12	2	2	Acetylation (Protein N-term)	400640	409670	316980	26353	3-beta-hydroxysteroid-Delta(8) Delta(7)-isomerase OS=Homo sapiens OX=9606 GN=EBP PE=1 SV=3
Q13601	11	4	4		242800	25416	74267	43665	KRR1 small subunit processome component homolog OS=Homo sapiens OX=9606 GN=KRR1 PE=1 SV=4
O00186	9	4	4		10877	333410	100960	67764	Syntaxin-binding protein 3 OS=Homo sapiens OX=9606 GN=STXBP3 PE=1 SV=2
Q8WXF1	12	4	3		495670	169610	43051	58744	Paraspeckle component 1 OS=Homo sapiens OX=9606 GN=PSPC1 PE=1 SV=1
P51452	31	4	4	Carbamidomethylation	423620	96947	363660	20478	Dual specificity protein phosphatase 3 OS=Homo sapiens OX=9606 GN=DUSP3 PE=1 SV=1
P50336	20	5	5		328400	9311.6	440840	50765	Protoporphyrinogen oxidase OS=Homo sapiens OX=9606 GN=PPOX PE=1 SV=1
P62942	46	4	4	Carbamidomethylation	245460	1033100	391290	11951	Peptidyl-prolyl cis-trans isomerase FKBP1A OS=Homo sapiens OX=9606 GN=FKBP1A PE=1 SV=2
Q9BQ75	19	6	6		305750	1723400	3763000	31884	Protein CMSS1 OS=Homo sapiens OX=9606 GN=CMSS1 PE=1 SV=2
Q15070	15	6	6		109610	249100	475430	48548	Mitochondrial inner membrane protein OXA1L OS=Homo sapiens OX=9606 GN=OXA1L PE=1 SV=3
P62854	43	4	4	Carbamidomethylation	578860	779460	5414000	13015	40S ribosomal protein S26 OS=Homo sapiens OX=9606 GN=RPS26 PE=1 SV=3
P63218	43	5	5	Acetylation (Protein N-term)	8493.2	963880	445200	7318	Guanine nucleotide-binding protein G(I)/G(S)/G(O) subunit gamma-5 OS=Homo sapiens OX=9606 GN=GNG5 PE=1 SV=3
Q9NX62	24	3	3		323850	70438	54888	38681	Golgi-resident adenosine 3' 5'-bisphosphate 3'-phosphatase OS=Homo sapiens OX=9606 GN=BPNT2 PE=1 SV=1
Q9NXE4	8	4	4		297830	4079300	49988	97810	Sphingomyelin phosphodiesterase 4 OS=Homo sapiens OX=9606 GN=SMPD4 PE=1 SV=3
P28482	22	6	5	Acetylation (Protein N-term)	1524000	308390	222820	41390	Mitogen-activated protein kinase 1 OS=Homo sapiens OX=9606 GN=MAPK1 PE=1 SV=3
P22570	14	3	3		270630	27904	935980	53837	NADPH:adrenodoxin oxidoreductase mitochondrial OS=Homo sapiens OX=9606 GN=FDXR PE=1 SV=3
Q9BRJ2	19	5	5		161430	855090	1197500	35351	39S ribosomal protein L45 mitochondrial OS=Homo sapiens OX=9606 GN=MRPL45 PE=1 SV=2
Q53H12	18	4	4	Carbamidomethylation	3129900	66599	656710	47137	Acylglycerol kinase mitochondrial OS=Homo sapiens OX=9606 GN=AGK PE=1 SV=2
Q9H7N4	6	5	5		2743000	5834100	2998800	139269	Splicing factor arginine/serine-rich 19 OS=Homo sapiens OX=9606 GN=SCAF1 PE=1 SV=3
Q9BTE3	14	5	5	Carbamidomethylation	1075900	313630	864240	72980	Mini-chromosome maintenance complex-binding protein OS=Homo sapiens OX=9606 GN=MCMBP PE=1 SV=2
Q13459	4	4	4	Oxidation (M)	295180	2367.9	95296	243398	Unconventional myosin-IXb OS=Homo sapiens OX=9606 GN=MYO9B PE=1 SV=3
P22059	11	6	6		306200	115200	1332000	89421	Oxysterol-binding protein 1 OS=Homo sapiens OX=9606 GN=OSBP PE=1 SV=1
P47914	21	3	3		33386	1677000	824130	17752	60S ribosomal protein L29 OS=Homo sapiens OX=9606 GN=RPL29 PE=1 SV=2
P61956	34	4	4	Acetylation (Protein N-term)	33331	2088200	439240	10871	Small ubiquitin-related modifier 2 OS=Homo sapiens OX=9606 GN=SUMO2 PE=1 SV=3
P60468	38	3	3		54247	420900	124110	9974	Protein transport protein Sec61 subunit beta OS=Homo sapiens OX=9606 GN=SEC61B PE=1 SV=2
Q9BPX5	45	4	3		1865300	613900	695980	16941	Actin-related protein 2/3 complex subunit 5-like protein OS=Homo sapiens OX=9606 GN=ARPC5L PE=1 SV=1
Q9BV40	45	4	4	Acetylation (Protein N-term)	18465	333100	221400	11438	Vesicle-associated membrane protein 8 OS=Homo sapiens OX=9606 GN=VAMP8 PE=1 SV=1
Q3MHD2	32	4	4	Carbamidomethylation; Acetylation (Protein N-term)	9894700	207630	203170	21701	Protein LSM12 homolog OS=Homo sapiens OX=9606 GN=LSM12 PE=1 SV=2
P07948	22	7	6		104050	355400	421910	58574	Tyrosine-protein kinase Lyn OS=Homo sapiens OX=9606 GN=LYN PE=1 SV=3
P36405	34	4	4		340200	123470	264220	20456	ADP-ribosylation factor-like protein 3 OS=Homo sapiens OX=9606 GN=ARL3 PE=1 SV=2
P35080	31	4	4	Carbamidomethylation	57882	405430	207580	15046	Profilin-2 OS=Homo sapiens OX=9606 GN=PFN2 PE=1 SV=3
Q99956	11	3	3		312240	0	1264900	41868	Dual specificity protein phosphatase 9 OS=Homo sapiens OX=9606 GN=DUSP9 PE=1 SV=1
P09497	22	5	5	Carbamidomethylation	41782	359880	259550	25190	Clathrin light chain B OS=Homo sapiens OX=9606 GN=CLTB PE=1 SV=1
O60220	53	3	3	Carbamidomethylation; Oxidation (M); Acetylation (Protein N-term)	249290	134130	727110	10998	Mitochondrial import inner membrane translocase subunit Tim8 A OS=Homo sapiens OX=9606 GN=TIMM8A PE=1 SV=1
P14174	36	3	3	Carbamidomethylation; Oxidation (M)	3299000	7326100	9170700	12476	Macrophage migration inhibitory factor OS=Homo sapiens OX=9606 GN=MIF PE=1 SV=4
Q9Y570	24	5	5	Carbamidomethylation	768570	107120	1092600	42315	Protein phosphatase methylesterase 1 OS=Homo sapiens OX=9606 GN=PPME1 PE=1 SV=3
O15305	13	2	2	Carbamidomethylation; Acetylation (Protein N-term)	537770	172850	16122	28082	Phosphomannomutase 2 OS=Homo sapiens OX=9606 GN=PMM2 PE=1 SV=1
Q9P032	17	3	3		1042	269860	159450	20266	NADH dehydrogenase [ubiquinone] 1 alpha subcomplex assembly factor 4 OS=Homo sapiens OX=9606 GN=NDUFAF4 PE=1 SV=1
Q7Z4Q2	7	4	4		136710	36315	18314	74583	HEAT repeat-containing protein 3 OS=Homo sapiens OX=9606 GN=HEATR3 PE=1 SV=2
Q00765	15	3	3		0	148940	128230	21493	Receptor expression-enhancing protein 5 OS=Homo sapiens OX=9606 GN=REEP5 PE=1 SV=3
Q5VT52	7	6	6		104230	0	188800	156019	Regulation of nuclear pre-mRNA domain-containing protein 2 OS=Homo sapiens OX=9606 GN=RPRD2 PE=1 SV=1
Q96RT1	4	3	3		0	0	77653	158297	Erbin OS=Homo sapiens OX=9606 GN=ERBIN PE=1 SV=2
P49207	33	7	7	Carbamidomethylation	323420	2481000	1757200	13293	60S ribosomal protein L34 OS=Homo sapiens OX=9606 GN=RPL34 PE=1 SV=3
Q96CT7	36	7	7		233700	912990	1229300	25835	Coiled-coil domain-containing protein 124 OS=Homo sapiens OX=9606 GN=CCDC124 PE=1 SV=1
O60930	19	3	3		13983	57294	91085	32064	Ribonuclease H1 OS=Homo sapiens OX=9606 GN=RNASEH1 PE=1 SV=2
P49458	53	5	5	Carbamidomethylation	95429	939110	526050	10112	Signal recognition particle 9 kDa protein OS=Homo sapiens OX=9606 GN=SRP9 PE=1 SV=2
Q5JVF3	10	3	3	Carbamidomethylation; Acetylation (Protein N-term)	629920	104790	129470	46030	PCI domain-containing protein 2 OS=Homo sapiens OX=9606 GN=PCID2 PE=1 SV=2
P56134	26	2	2	Oxidation (M)	324580	179890	336250	10918	ATP synthase subunit f mitochondrial OS=Homo sapiens OX=9606 GN=ATP5MF PE=1 SV=3
Q71UM5	63	4	1	Carbamidomethylation; Oxidation (M)	280370	3320200	1735200	9477	40S ribosomal protein S27-like OS=Homo sapiens OX=9606 GN=RPS27L PE=1 SV=3
P00374	18	2	2		321300	90536	29022	21453	Dihydrofolate reductase OS=Homo sapiens OX=9606 GN=DHFR PE=1 SV=2
P36543	30	4	4		1325500	918710	482940	26145	V-type proton ATPase subunit E 1 OS=Homo sapiens OX=9606 GN=ATP6V1E1 PE=1 SV=1
P18077	46	8	8		358320	1390200	382130	12538	60S ribosomal protein L35a OS=Homo sapiens OX=9606 GN=RPL35A PE=1 SV=2
Q86W42	15	3	3		257100	39396	119640	37535	THO complex subunit 6 homolog OS=Homo sapiens OX=9606 GN=THOC6 PE=1 SV=1
P61803	28	3	3	Acetylation (Protein N-term)	78987	373540	714330	12497	Dolichyl-diphosphooligosaccharide--protein glycosyltransferase subunit DAD1 OS=Homo sapiens OX=9606 GN=DAD1 PE=1 SV=3
O43768	36	4	4	Acetylation (Protein N-term)	0	179930	6800.2	13389	Alpha-endosulfine OS=Homo sapiens OX=9606 GN=ENSA PE=1 SV=1
Q96QD9	10	3	3		439590	273160	640260	35818	UAP56-interacting factor OS=Homo sapiens OX=9606 GN=FYTTD1 PE=1 SV=3
Q9NPE3	59	4	4		2705800	513520	825910	7706	H/ACA ribonucleoprotein complex subunit 3 OS=Homo sapiens OX=9606 GN=NOP10 PE=1 SV=1
P46734	10	2	2		207660	0	0	39318	Dual specificity mitogen-activated protein kinase kinase 3 OS=Homo sapiens OX=9606 GN=MAP2K3 PE=1 SV=2
P53367	14	3	3		1159700	53801	259090	41738	Arfaptin-1 OS=Homo sapiens OX=9606 GN=ARFIP1 PE=1 SV=2
Q5VTL8	8	3	3		1115500	535100	12025	64468	Pre-mRNA-splicing factor 38B OS=Homo sapiens OX=9606 GN=PRPF38B PE=1 SV=1
Q16540	36	4	4		148570	32596	70678	17781	39S ribosomal protein L23 mitochondrial OS=Homo sapiens OX=9606 GN=MRPL23 PE=1 SV=1
Q8WUY1	26	3	3		2540800	254410	232070	23865	Protein THEM6 OS=Homo sapiens OX=9606 GN=THEM6 PE=1 SV=2
Q9H9L3	20	5	5	Acetylation (Protein N-term)	1778300	1174500	57005	39154	Interferon-stimulated 20 kDa exonuclease-like 2 OS=Homo sapiens OX=9606 GN=ISG20L2 PE=1 SV=1
P46926	30	4	4	Carbamidomethylation	328630	62273	111160	32669	Glucosamine-6-phosphate isomerase 1 OS=Homo sapiens OX=9606 GN=GNPDA1 PE=1 SV=1
P00918	18	3	3		437890	111970	8622.6	29246	Carbonic anhydrase 2 OS=Homo sapiens OX=9606 GN=CA2 PE=1 SV=2
Q96FX7	18	3	3		2847.1	139360	95910	31382	tRNA (adenine(58)-N(1))-methyltransferase catalytic subunit TRMT61A OS=Homo sapiens OX=9606 GN=TRMT61A PE=1 SV=1
Q9P1F3	36	2	2	Carbamidomethylation; Oxidation (M); Acetylation (Protein N-term)	892090	142800	848580	9056	Costars family protein ABRACL OS=Homo sapiens OX=9606 GN=ABRACL PE=1 SV=1
O15533	12	4	4		0	279330	230170	47626	Tapasin OS=Homo sapiens OX=9606 GN=TAPBP PE=1 SV=1
P15151	9	3	3		0	26209	706670	45303	Poliovirus receptor OS=Homo sapiens OX=9606 GN=PVR PE=1 SV=2
Q9Y4Y9	46	2	2	Acetylation (Protein N-term)	490540	212000	55539	9937	U6 snRNA-associated Sm-like protein LSm5 OS=Homo sapiens OX=9606 GN=LSM5 PE=1 SV=3
P06703	43	5	4		138670	13174000	1155000	10180	Protein S100-A6 OS=Homo sapiens OX=9606 GN=S100A6 PE=1 SV=1
A5YKK6	3	5	5		692270	253260	313010	266937	CCR4-NOT transcription complex subunit 1 OS=Homo sapiens OX=9606 GN=CNOT1 PE=1 SV=2
O14949	26	2	2		1113600	2128900	73480	9906	Cytochrome b-c1 complex subunit 8 OS=Homo sapiens OX=9606 GN=UQCRQ PE=1 SV=4
Q9UNH7	18	4	4	Carbamidomethylation	505170	51932	275150	46649	Sorting nexin-6 OS=Homo sapiens OX=9606 GN=SNX6 PE=1 SV=1
Q53EP0	3	2	2		533730	57608	548440	132888	Fibronectin type III domain-containing protein 3B OS=Homo sapiens OX=9606 GN=FNDC3B PE=1 SV=2
Q15642	7	2	2		154910	203570	1522.6	68352	Cdc42-interacting protein 4 OS=Homo sapiens OX=9606 GN=TRIP10 PE=1 SV=3
P56545	17	5	3	Carbamidomethylation	1020100	77835	183740	48945	C-terminal-binding protein 2 OS=Homo sapiens OX=9606 GN=CTBP2 PE=1 SV=1
Q68CZ2	5	4	4	Carbamidomethylation	761190	51846	277980	155265	Tensin-3 OS=Homo sapiens OX=9606 GN=TNS3 PE=1 SV=2
P40616	22	3	3		1703700	394690	1188300	20418	ADP-ribosylation factor-like protein 1 OS=Homo sapiens OX=9606 GN=ARL1 PE=1 SV=1
Q9NX55	33	3	3	Oxidation (M)	481220	103110	236110	14665	Huntingtin-interacting protein K OS=Homo sapiens OX=9606 GN=HYPK PE=1 SV=2
O15155	25	2	2		203200	204950	71223	13289	BET1 homolog OS=Homo sapiens OX=9606 GN=BET1 PE=1 SV=1
Q96AB3	35	3	3		3105900	355110	641580	22337	Isochorismatase domain-containing protein 2 OS=Homo sapiens OX=9606 GN=ISOC2 PE=1 SV=1
Q9UNK0	11	2	2		947360	136020	306360	26907	Syntaxin-8 OS=Homo sapiens OX=9606 GN=STX8 PE=1 SV=2
P13284	12	2	2		56039	200750	3209.8	27964	Gamma-interferon-inducible lysosomal thiol reductase OS=Homo sapiens OX=9606 GN=IFI30 PE=1 SV=3
Q9BXK5	8	3	3		417350	52184	45211	52723	Bcl-2-like protein 13 OS=Homo sapiens OX=9606 GN=BCL2L13 PE=1 SV=1
O60524	4	3	3		705890	190170	117020	122954	Nuclear export mediator factor NEMF OS=Homo sapiens OX=9606 GN=NEMF PE=1 SV=4
Q9H0U3	6	2	2		14588	92299	51742	38037	Magnesium transporter protein 1 OS=Homo sapiens OX=9606 GN=MAGT1 PE=1 SV=1
Q06033	4	3	3		115490	80384	85274	99849	Inter-alpha-trypsin inhibitor heavy chain H3 OS=Homo sapiens OX=9606 GN=ITIH3 PE=1 SV=2
Q99442	9	3	3		23316	42592	113640	45862	Translocation protein SEC62 OS=Homo sapiens OX=9606 GN=SEC62 PE=1 SV=1
O00479	36	2	2		0	103220	69683	9539	High mobility group nucleosome-binding domain-containing protein 4 OS=Homo sapiens OX=9606 GN=HMGN4 PE=1 SV=3
P62273	34	2	2		13422	402050	868550	6677	40S ribosomal protein S29 OS=Homo sapiens OX=9606 GN=RPS29 PE=1 SV=2
Q8N357	3	1	1		0	27189	9546.2	40214	Solute carrier family 35 member F6 OS=Homo sapiens OX=9606 GN=SLC35F6 PE=1 SV=1
Q96K17	37	2	2		596880	274040	47293	17271	Transcription factor BTF3 homolog 4 OS=Homo sapiens OX=9606 GN=BTF3L4 PE=1 SV=1
Q56VL3	18	2	2		89808	0	102190	16954	OCIA domain-containing protein 2 OS=Homo sapiens OX=9606 GN=OCIAD2 PE=1 SV=1
Q9NYL4	10	2	2		103930	253860	594350	22180	Peptidyl-prolyl cis-trans isomerase FKBP11 OS=Homo sapiens OX=9606 GN=FKBP11 PE=1 SV=1
O95453	6	3	3	Carbamidomethylation	225920	11891	111840	73451	Poly(A)-specific ribonuclease PARN OS=Homo sapiens OX=9606 GN=PARN PE=1 SV=1
O14617	2	1	1		2745600	432360	102630	130158	AP-3 complex subunit delta-1 OS=Homo sapiens OX=9606 GN=AP3D1 PE=1 SV=1
O95070	11	2	2	Acetylation (Protein N-term)	93078	32936	68766	32011	Protein YIF1A OS=Homo sapiens OX=9606 GN=YIF1A PE=1 SV=2
Q8N5P1	6	1	1	Acetylation (Protein N-term)	820530	200180	168540	33576	Zinc finger CCCH domain-containing protein 8 OS=Homo sapiens OX=9606 GN=ZC3H8 PE=1 SV=2
P61009	12	2	2		17765	1186000	216710	20313	Signal peptidase complex subunit 3 OS=Homo sapiens OX=9606 GN=SPCS3 PE=1 SV=1
O94903	6	1	1		1869500	146810	101400	30344	Pyridoxal phosphate homeostasis protein OS=Homo sapiens OX=9606 GN=PLPBP PE=1 SV=1
P26639	47	32	27	Carbamidomethylation; Oxidation (M)	4435200	3807800	3215900	83435	Threonine--tRNA ligase 1 cytoplasmic OS=Homo sapiens OX=9606 GN=TARS1 PE=1 SV=3
P41252	37	36	35	Carbamidomethylation; Oxidation (M); Acetylation (Protein N-term)	3394800	2112000	5191900	144498	Isoleucine--tRNA ligase cytoplasmic OS=Homo sapiens OX=9606 GN=IARS1 PE=1 SV=2
P42285	35	26	26	Carbamidomethylation; Oxidation (M); Acetylation (Protein N-term)	637800	866890	836810	117805	Exosome RNA helicase MTR4 OS=Homo sapiens OX=9606 GN=MTREX PE=1 SV=3
P23526	44	18	17	Carbamidomethylation; Oxidation (M)	2345600	3590400	2439500	47716	Adenosylhomocysteinase OS=Homo sapiens OX=9606 GN=AHCY PE=1 SV=4
P48047	68	13	13	Carbamidomethylation; Oxidation (M)	4855200	5269100	3096000	23277	ATP synthase subunit O mitochondrial OS=Homo sapiens OX=9606 GN=ATP5PO PE=1 SV=1
Q9BZZ5	31	10	10	Carbamidomethylation	593880	822920	1137800	59005	Apoptosis inhibitor 5 OS=Homo sapiens OX=9606 GN=API5 PE=1 SV=3
Q9Y679	32	10	10	Acetylation (Protein N-term)	1503500	687520	346210	45787	Lipid droplet-regulating VLDL assembly factor AUP1 OS=Homo sapiens OX=9606 GN=AUP1 PE=1 SV=2
P24539	41	9	9		148620	1087400	299780	28909	ATP synthase F(0) complex subunit B1 mitochondrial OS=Homo sapiens OX=9606 GN=ATP5PB PE=1 SV=2
Q8TAT6	24	8	8	Carbamidomethylation	1042600	239860	209640	68120	Nuclear protein localization protein 4 homolog OS=Homo sapiens OX=9606 GN=NPLOC4 PE=1 SV=3
P78316	20	13	13		592780	924590	271290	97668	Nucleolar protein 14 OS=Homo sapiens OX=9606 GN=NOP14 PE=1 SV=3
Q06323	50	10	10	Carbamidomethylation	1812000	1382900	507080	28723	Proteasome activator complex subunit 1 OS=Homo sapiens OX=9606 GN=PSME1 PE=1 SV=1
Q9NQ50	42	6	6		618700	282230	175410	24490	39S ribosomal protein L40 mitochondrial OS=Homo sapiens OX=9606 GN=MRPL40 PE=1 SV=1
Q16774	20	3	3	Carbamidomethylation; Acetylation (Protein N-term)	9698	78046	81803	21726	Guanylate kinase OS=Homo sapiens OX=9606 GN=GUK1 PE=1 SV=2
P31327	70	105	101	Carbamidomethylation; Oxidation (M)	36842000	24360000	27267000	164939	Carbamoyl-phosphate synthase [ammonia] mitochondrial OS=Homo sapiens OX=9606 GN=CPS1 PE=1 SV=2
O60568	53	29	29	Carbamidomethylation	1709000	2546100	1823200	84785	Multifunctional procollagen lysine hydroxylase and glycosyltransferase LH3 OS=Homo sapiens OX=9606 GN=PLOD3 PE=1 SV=1
Q9Y265	71	26	26	Carbamidomethylation; Oxidation (M)	4708100	2432300	1945600	50228	RuvB-like 1 OS=Homo sapiens OX=9606 GN=RUVBL1 PE=1 SV=1
Q12788	34	16	16	Carbamidomethylation	3010400	3293700	6183100	89035	Transducin beta-like protein 3 OS=Homo sapiens OX=9606 GN=TBL3 PE=1 SV=2
Q14527	26	17	17		274940	846470	1202900	113928	Helicase-like transcription factor OS=Homo sapiens OX=9606 GN=HLTF PE=1 SV=2
P28838	39	14	14	Carbamidomethylation; Oxidation (M)	1180100	612380	827330	56166	Cytosol aminopeptidase OS=Homo sapiens OX=9606 GN=LAP3 PE=1 SV=3
P54727	52	14	13	Carbamidomethylation; Oxidation (M)	1104200	1476300	2037600	43171	UV excision repair protein RAD23 homolog B OS=Homo sapiens OX=9606 GN=RAD23B PE=1 SV=1
Q9BUQ8	31	19	19		590640	2117300	2546300	95583	Probable ATP-dependent RNA helicase DDX23 OS=Homo sapiens OX=9606 GN=DDX23 PE=1 SV=3
O43396	56	10	10	Carbamidomethylation	961170	258980	728840	32251	Thioredoxin-like protein 1 OS=Homo sapiens OX=9606 GN=TXNL1 PE=1 SV=3
Q96KA5	25	9	9		493280	156640	339540	62229	Cleft lip and palate transmembrane protein 1-like protein OS=Homo sapiens OX=9606 GN=CLPTM1L PE=1 SV=1
P61221	17	7	7	Carbamidomethylation	592760	524600	351300	67314	ATP-binding cassette sub-family E member 1 OS=Homo sapiens OX=9606 GN=ABCE1 PE=1 SV=1
Q9UNM6	33	9	9	Carbamidomethylation; Oxidation (M)	3122100	2734100	1144800	42946	26S proteasome non-ATPase regulatory subunit 13 OS=Homo sapiens OX=9606 GN=PSMD13 PE=1 SV=2
Q9Y2Q3	54	8	8		234630	182820	464970	25497	Glutathione S-transferase kappa 1 OS=Homo sapiens OX=9606 GN=GSTK1 PE=1 SV=3
P60983	54	4	4	Carbamidomethylation; Acetylation (Protein N-term)	822810	147580	287640	16713	Glia maturation factor beta OS=Homo sapiens OX=9606 GN=GMFB PE=1 SV=2
Q9Y2H6	7	4	4	Carbamidomethylation	1025700	1874700	618040	131852	Fibronectin type-III domain-containing protein 3A OS=Homo sapiens OX=9606 GN=FNDC3A PE=1 SV=4
P35610	9	5	5		90107	43847	153490	64735	Sterol O-acyltransferase 1 OS=Homo sapiens OX=9606 GN=SOAT1 PE=1 SV=3
Q12800	10	3	2	Carbamidomethylation	80580	14107	114310	57256	Alpha-globin transcription factor CP2 OS=Homo sapiens OX=9606 GN=TFCP2 PE=1 SV=2
Q15370	28	4	4	Acetylation (Protein N-term)	0	250070	89176	13133	Elongin-B OS=Homo sapiens OX=9606 GN=ELOB PE=1 SV=1
Q9Y2R0	18	2	2		4694.4	109390	102630	11731	Cytochrome c oxidase assembly factor 3 homolog mitochondrial OS=Homo sapiens OX=9606 GN=COA3 PE=1 SV=1
Q14258	28	16	16		625220	902380	1844600	70974	E3 ubiquitin/ISG15 ligase TRIM25 OS=Homo sapiens OX=9606 GN=TRIM25 PE=1 SV=2
Q9UI12	11	3	3		182010	437650	13404	55883	V-type proton ATPase subunit H OS=Homo sapiens OX=9606 GN=ATP6V1H PE=1 SV=1
Q9H3S7	4	4	4		86528	14860	299560	178972	Tyrosine-protein phosphatase non-receptor type 23 OS=Homo sapiens OX=9606 GN=PTPN23 PE=1 SV=1
P17812	53	22	20	Carbamidomethylation; Oxidation (M)	1121300	520940	3276100	66690	CTP synthase 1 OS=Homo sapiens OX=9606 GN=CTPS1 PE=1 SV=2
Q9Y3E5	43	4	4		122050	4012.9	175750	19194	Peptidyl-tRNA hydrolase 2 mitochondrial OS=Homo sapiens OX=9606 GN=PTRH2 PE=1 SV=1
Q9UHG3	25	7	7		3576900	323510	1478600	56640	Prenylcysteine oxidase 1 OS=Homo sapiens OX=9606 GN=PCYOX1 PE=1 SV=3
Q92575	10	3	3		2659.7	185220	101070	56778	UBX domain-containing protein 4 OS=Homo sapiens OX=9606 GN=UBXN4 PE=1 SV=2
P61081	25	4	4	Carbamidomethylation	242460	323830	663460	20900	NEDD8-conjugating enzyme Ubc12 OS=Homo sapiens OX=9606 GN=UBE2M PE=1 SV=1
Q8NFH5	48	8	8	Acetylation (Protein N-term)	1963300	1410600	556020	34774	Nucleoporin NUP35 OS=Homo sapiens OX=9606 GN=NUP35 PE=1 SV=1
P25205	58	38	37	Carbamidomethylation; Acetylation (Protein N-term)	2490200	1626400	2449900	90981	DNA replication licensing factor MCM3 OS=Homo sapiens OX=9606 GN=MCM3 PE=1 SV=3
P16435	52	28	28	Carbamidomethylation; Oxidation (M)	1861700	4610700	1813300	76690	NADPH--cytochrome P450 reductase OS=Homo sapiens OX=9606 GN=POR PE=1 SV=2
P62258	67	22	20	Carbamidomethylation; Oxidation (M); Acetylation (Protein N-term)	9566400	13203000	4428600	29174	14-3-3 protein epsilon OS=Homo sapiens OX=9606 GN=YWHAE PE=1 SV=1
Q9Y266	60	18	18	Carbamidomethylation	356030	1917000	1730100	38243	Nuclear migration protein nudC OS=Homo sapiens OX=9606 GN=NUDC PE=1 SV=1
Q92597	57	10	10	Carbamidomethylation; Oxidation (M)	1499300	321000	2015500	42835	Protein NDRG1 OS=Homo sapiens OX=9606 GN=NDRG1 PE=1 SV=1
P14550	37	9	9	Carbamidomethylation	1156100	1022200	941690	36573	Aldo-keto reductase family 1 member A1 OS=Homo sapiens OX=9606 GN=AKR1A1 PE=1 SV=3
Q9UNF1	17	5	5		447220	98523	2220300	64954	Melanoma-associated antigen D2 OS=Homo sapiens OX=9606 GN=MAGED2 PE=1 SV=2
Q9BXS5	14	4	4	Acetylation (Protein N-term)	1016900	543350	55816	48587	AP-1 complex subunit mu-1 OS=Homo sapiens OX=9606 GN=AP1M1 PE=1 SV=3
Q9H444	18	3	3		236950	261300	65332	24950	Charged multivesicular body protein 4b OS=Homo sapiens OX=9606 GN=CHMP4B PE=1 SV=1
P46108	40	8	7		382090	227610	269990	33831	Adapter molecule crk OS=Homo sapiens OX=9606 GN=CRK PE=1 SV=2
A1L0T0	37	15	15	Carbamidomethylation; Oxidation (M)	4862400	1140600	4716400	67868	2-hydroxyacyl-CoA lyase 2 OS=Homo sapiens OX=9606 GN=ILVBL PE=1 SV=2
P52209	44	17	17	Carbamidomethylation	1362100	3141300	2992800	53140	6-phosphogluconate dehydrogenase decarboxylating OS=Homo sapiens OX=9606 GN=PGD PE=1 SV=3
Q9BVK6	46	11	8	Carbamidomethylation; Oxidation (M)	1208700	1752300	937610	27277	Transmembrane emp24 domain-containing protein 9 OS=Homo sapiens OX=9606 GN=TMED9 PE=1 SV=2
O00566	24	12	12		206220	341690	316520	78864	U3 small nucleolar ribonucleoprotein protein MPP10 OS=Homo sapiens OX=9606 GN=MPHOSPH10 PE=1 SV=2
Q9NY61	33	10	10	Acetylation (Protein N-term)	227530	108180	253040	63133	Protein AATF OS=Homo sapiens OX=9606 GN=AATF PE=1 SV=1
O60488	27	14	12		1568000	1589300	1019900	79188	Long-chain-fatty-acid--CoA ligase 4 OS=Homo sapiens OX=9606 GN=ACSL4 PE=1 SV=2
P68104	69	46	27	Carbamidomethylation; Oxidation (M)	145820000	31026000	32577000	50141	Elongation factor 1-alpha 1 OS=Homo sapiens OX=9606 GN=EEF1A1 PE=1 SV=1
Q9Y678	38	19	17	Carbamidomethylation	973610	269020	921880	97718	Coatomer subunit gamma-1 OS=Homo sapiens OX=9606 GN=COPG1 PE=1 SV=1
Q9BXJ9	25	15	15	Carbamidomethylation	1696600	2092200	879410	101272	N-alpha-acetyltransferase 15 NatA auxiliary subunit OS=Homo sapiens OX=9606 GN=NAA15 PE=1 SV=1
Q16718	60	6	6	Carbamidomethylation	493330	69842	221340	13459	NADH dehydrogenase [ubiquinone] 1 alpha subcomplex subunit 5 OS=Homo sapiens OX=9606 GN=NDUFA5 PE=1 SV=3
P57105	28	2	2		258590	36698	15491	15928	Synaptojanin-2-binding protein OS=Homo sapiens OX=9606 GN=SYNJ2BP PE=1 SV=2
Q8WVM7	7	5	5		128450	145090	225680	144427	Cohesin subunit SA-1 OS=Homo sapiens OX=9606 GN=STAG1 PE=1 SV=3
Q9BXW7	53	12	12	Carbamidomethylation	525120	187660	159710	46321	Haloacid dehalogenase-like hydrolase domain-containing 5 OS=Homo sapiens OX=9606 GN=HDHD5 PE=1 SV=1
Q13636	37	5	5		491050	86156	246870	21569	Ras-related protein Rab-31 OS=Homo sapiens OX=9606 GN=RAB31 PE=1 SV=1
Q08945	40	27	27	Carbamidomethylation; Oxidation (M); Acetylation (Protein N-term)	3587900	1518300	3763400	81075	FACT complex subunit SSRP1 OS=Homo sapiens OX=9606 GN=SSRP1 PE=1 SV=1
Q15427	22	8	8	Acetylation (Protein N-term)	517190	296050	139590	44386	Splicing factor 3B subunit 4 OS=Homo sapiens OX=9606 GN=SF3B4 PE=1 SV=1
P16144	3	4	4		486260	934650	557360	202166	Integrin beta-4 OS=Homo sapiens OX=9606 GN=ITGB4 PE=1 SV=5
P08579	46	11	9	Acetylation (Protein N-term)	278020	302960	548960	25486	U2 small nuclear ribonucleoprotein B'' OS=Homo sapiens OX=9606 GN=SNRPB2 PE=1 SV=1
Q96TC7	23	7	7		892960	1416100	1121100	52118	Regulator of microtubule dynamics protein 3 OS=Homo sapiens OX=9606 GN=RMDN3 PE=1 SV=2
Q8IVS2	32	7	7		628140	68073	140280	42962	Malonyl-CoA-acyl carrier protein transacylase mitochondrial OS=Homo sapiens OX=9606 GN=MCAT PE=1 SV=2
P62256	16	2	2		164100	101930	24214	20655	Ubiquitin-conjugating enzyme E2 H OS=Homo sapiens OX=9606 GN=UBE2H PE=1 SV=1
P35241	54	32	16	Carbamidomethylation; Oxidation (M)	1844000	1503100	1170800	68564	Radixin OS=Homo sapiens OX=9606 GN=RDX PE=1 SV=1
P19623	52	13	13	Carbamidomethylation; Oxidation (M); Acetylation (Protein N-term)	1681600	797870	1146900	33825	Spermidine synthase OS=Homo sapiens OX=9606 GN=SRM PE=1 SV=1
O43402	14	2	2		0	6618.1	5870.5	23773	ER membrane protein complex subunit 8 OS=Homo sapiens OX=9606 GN=EMC8 PE=1 SV=1
Q9NQZ2	27	10	10		501060	286750	113150	54558	Something about silencing protein 10 OS=Homo sapiens OX=9606 GN=UTP3 PE=1 SV=1
Q16576	54	17	11	Carbamidomethylation	1966200	1220400	1507500	47820	Histone-binding protein RBBP7 OS=Homo sapiens OX=9606 GN=RBBP7 PE=1 SV=1
Q9Y282	8	3	3	Carbamidomethylation	26110	215300	453360	43222	Endoplasmic reticulum-Golgi intermediate compartment protein 3 OS=Homo sapiens OX=9606 GN=ERGIC3 PE=1 SV=1
P28288	23	11	11		501410	658080	1115400	75476	ATP-binding cassette sub-family D member 3 OS=Homo sapiens OX=9606 GN=ABCD3 PE=1 SV=1
Q9UKL0	14	4	4		1230700	239980	103340	53327	REST corepressor 1 OS=Homo sapiens OX=9606 GN=RCOR1 PE=1 SV=2
O95197	1	3	3		34746	2447600	221020	112611	Reticulon-3 OS=Homo sapiens OX=9606 GN=RTN3 PE=1 SV=2
P41250	46	23	23	Carbamidomethylation; Oxidation (M)	3031200	1629400	2764000	83166	Glycine--tRNA ligase OS=Homo sapiens OX=9606 GN=GARS1 PE=1 SV=3
Q9BVP2	35	16	15		2603700	5040700	1984400	61993	Guanine nucleotide-binding protein-like 3 OS=Homo sapiens OX=9606 GN=GNL3 PE=1 SV=2
P46977	11	9	9		79242	75987	203100	80530	Dolichyl-diphosphooligosaccharide--protein glycosyltransferase subunit STT3A OS=Homo sapiens OX=9606 GN=STT3A PE=1 SV=2
Q969X5	22	5	5		2350000	961780	2011500	32592	Endoplasmic reticulum-Golgi intermediate compartment protein 1 OS=Homo sapiens OX=9606 GN=ERGIC1 PE=1 SV=1
Q9NZ45	26	2	2		10268	119300	82405	12199	CDGSH iron-sulfur domain-containing protein 1 OS=Homo sapiens OX=9606 GN=CISD1 PE=1 SV=1
P55081	40	13	13		316770	102820	1947700	51958	Microfibrillar-associated protein 1 OS=Homo sapiens OX=9606 GN=MFAP1 PE=1 SV=2
Q13595	19	7	5		36340	199560	188920	32689	Transformer-2 protein homolog alpha OS=Homo sapiens OX=9606 GN=TRA2A PE=1 SV=1
Q96HR9	16	3	3		48657	220610	397790	23418	Receptor expression-enhancing protein 6 OS=Homo sapiens OX=9606 GN=REEP6 PE=1 SV=2
P49406	32	8	8	Carbamidomethylation	84787	67654	928210	33535	39S ribosomal protein L19 mitochondrial OS=Homo sapiens OX=9606 GN=MRPL19 PE=1 SV=2
P06737	27	18	14	Carbamidomethylation	1002000	1461300	741330	97149	Glycogen phosphorylase liver form OS=Homo sapiens OX=9606 GN=PYGL PE=1 SV=4
P36542	35	11	11	Carbamidomethylation; Oxidation (M)	1063200	2627100	1417800	32996	ATP synthase subunit gamma mitochondrial OS=Homo sapiens OX=9606 GN=ATP5F1C PE=1 SV=1
Q01813	39	23	20	Carbamidomethylation; Oxidation (M)	2210800	1331100	1481900	85596	ATP-dependent 6-phosphofructokinase platelet type OS=Homo sapiens OX=9606 GN=PFKP PE=1 SV=2
P04818	43	10	10	Carbamidomethylation	505120	323870	529310	35716	Thymidylate synthase OS=Homo sapiens OX=9606 GN=TYMS PE=1 SV=3
Q9UMY4	28	4	3		257450	171440	352600	18885	Sorting nexin-12 OS=Homo sapiens OX=9606 GN=SNX12 PE=1 SV=4
Q96S66	26	9	9		182750	579520	486440	62023	Chloride channel CLIC-like protein 1 OS=Homo sapiens OX=9606 GN=CLCC1 PE=1 SV=1
Q9BZK7	27	8	5	Carbamidomethylation; Acetylation (Protein N-term)	728070	2315700	473120	55595	F-box-like/WD repeat-containing protein TBL1XR1 OS=Homo sapiens OX=9606 GN=TBL1XR1 PE=1 SV=1
Q9Y2S6	31	3	3		0	209390	58093	7066	Translation machinery-associated protein 7 OS=Homo sapiens OX=9606 GN=TMA7 PE=1 SV=1
P52789	16	11	8	Carbamidomethylation	577850	938780	965620	102380	Hexokinase-2 OS=Homo sapiens OX=9606 GN=HK2 PE=1 SV=2
Q9UJS0	41	19	14	Carbamidomethylation	1840500	232320	1605900	74176	Calcium-binding mitochondrial carrier protein Aralar2 OS=Homo sapiens OX=9606 GN=SLC25A13 PE=1 SV=2
P53618	36	22	22	Carbamidomethylation	739590	592490	735800	107142	Coatomer subunit beta OS=Homo sapiens OX=9606 GN=COPB1 PE=1 SV=3
P17858	15	8	5	Acetylation (Protein N-term)	2487000	500620	99292	85018	ATP-dependent 6-phosphofructokinase liver type OS=Homo sapiens OX=9606 GN=PFKL PE=1 SV=6
Q7Z4V5	16	8	6		53555	8010.6	0	74317	Hepatoma-derived growth factor-related protein 2 OS=Homo sapiens OX=9606 GN=HDGFL2 PE=1 SV=1
Q96CW1	18	6	6		4995800	439140	691290	49655	AP-2 complex subunit mu OS=Homo sapiens OX=9606 GN=AP2M1 PE=1 SV=2
A6NJ78	14	3	3		203790	66865	21788	46121	12S rRNA N4-methylcytidine (m4C) methyltransferase OS=Homo sapiens OX=9606 GN=METTL15 PE=1 SV=1
Q9UMX0	29	9	5		906170	198950	209000	62519	Ubiquilin-1 OS=Homo sapiens OX=9606 GN=UBQLN1 PE=1 SV=2
O60763	12	8	8		744730	213270	1091700	107895	General vesicular transport factor p115 OS=Homo sapiens OX=9606 GN=USO1 PE=1 SV=2
P17813	12	7	7	Carbamidomethylation	189260	97946	455100	70578	Endoglin OS=Homo sapiens OX=9606 GN=ENG PE=1 SV=2
Q9UNF0	7	3	3		2783600	773950	25638	55739	Protein kinase C and casein kinase substrate in neurons protein 2 OS=Homo sapiens OX=9606 GN=PACSIN2 PE=1 SV=2
Q15067	25	11	11	Carbamidomethylation	854970	57343	662600	74424	Peroxisomal acyl-coenzyme A oxidase 1 OS=Homo sapiens OX=9606 GN=ACOX1 PE=1 SV=3
P61769	38	4	4	Carbamidomethylation	2976000	1407600	688270	13715	Beta-2-microglobulin OS=Homo sapiens OX=9606 GN=B2M PE=1 SV=1
Q9HC36	21	4	4		171380	0	40454	47020	rRNA methyltransferase 3 mitochondrial OS=Homo sapiens OX=9606 GN=MRM3 PE=1 SV=2
Q9P035	32	9	8	Acetylation (Protein N-term)	415690	219590	221030	43160	Very-long-chain (3R)-3-hydroxyacyl-CoA dehydratase 3 OS=Homo sapiens OX=9606 GN=HACD3 PE=1 SV=2
Q9Y2Z4	24	7	7		3130400	1147600	316210	53199	Tyrosine--tRNA ligase mitochondrial OS=Homo sapiens OX=9606 GN=YARS2 PE=1 SV=2
Q9H488	20	5	5	Carbamidomethylation	277880	130900	133630	43956	GDP-fucose protein O-fucosyltransferase 1 OS=Homo sapiens OX=9606 GN=POFUT1 PE=1 SV=1
Q96A33	36	14	14		215930	355360	530300	55874	PAT complex subunit CCDC47 OS=Homo sapiens OX=9606 GN=CCDC47 PE=1 SV=1
Q13435	46	36	36	Oxidation (M); Acetylation (Protein N-term)	2350100	2425500	1872600	100228	Splicing factor 3B subunit 2 OS=Homo sapiens OX=9606 GN=SF3B2 PE=1 SV=2
P50579	40	12	12	Carbamidomethylation; Acetylation (Protein N-term)	442800	163700	733060	52892	Methionine aminopeptidase 2 OS=Homo sapiens OX=9606 GN=METAP2 PE=1 SV=1
Q8WUM0	21	14	13	Carbamidomethylation	688550	387670	1296100	128979	Nuclear pore complex protein Nup133 OS=Homo sapiens OX=9606 GN=NUP133 PE=1 SV=2
Q9NTJ3	24	21	21		362080	1471600	788390	147182	Structural maintenance of chromosomes protein 4 OS=Homo sapiens OX=9606 GN=SMC4 PE=1 SV=2
Q9NQG5	36	7	4	Carbamidomethylation	156790	79213	1625400	36900	Regulation of nuclear pre-mRNA domain-containing protein 1B OS=Homo sapiens OX=9606 GN=RPRD1B PE=1 SV=1
O00592	20	6	6		42840	638640	223260	58635	Podocalyxin OS=Homo sapiens OX=9606 GN=PODXL PE=1 SV=2
Q9NZZ3	26	3	3	Carbamidomethylation; Oxidation (M)	552480	134370	31999	24571	Charged multivesicular body protein 5 OS=Homo sapiens OX=9606 GN=CHMP5 PE=1 SV=1
P21796	83	23	21	Carbamidomethylation; Oxidation (M); Acetylation (Protein N-term)	7029700	7291300	9994800	30773	Voltage-dependent anion-selective channel protein 1 OS=Homo sapiens OX=9606 GN=VDAC1 PE=1 SV=2
Q9NXF1	27	17	17		741260	1773000	547330	105674	Testis-expressed protein 10 OS=Homo sapiens OX=9606 GN=TEX10 PE=1 SV=2
O75475	31	13	11	Carbamidomethylation	394370	308520	528690	60103	PC4 and SFRS1-interacting protein OS=Homo sapiens OX=9606 GN=PSIP1 PE=1 SV=1
P01111	46	9	7		668210	3742000	230590	21229	GTPase NRas OS=Homo sapiens OX=9606 GN=NRAS PE=1 SV=1
Q14160	15	14	14		1003700	587990	180540	174884	Protein scribble homolog OS=Homo sapiens OX=9606 GN=SCRIB PE=1 SV=4
Q15165	56	10	10	Carbamidomethylation	183010	276830	485820	39381	Serum paraoxonase/arylesterase 2 OS=Homo sapiens OX=9606 GN=PON2 PE=1 SV=4
P14735	9	5	5	Carbamidomethylation	288370	23659	361490	117968	Insulin-degrading enzyme OS=Homo sapiens OX=9606 GN=IDE PE=1 SV=4
O95777	61	3	3		632310	154840	106050	10403	U6 snRNA-associated Sm-like protein LSm8 OS=Homo sapiens OX=9606 GN=LSM8 PE=1 SV=3
Q6NZI2	33	7	7	Acetylation (Protein N-term)	518770	110890	99242	43476	Caveolae-associated protein 1 OS=Homo sapiens OX=9606 GN=CAVIN1 PE=1 SV=1
Q12769	16	15	15	Carbamidomethylation	4063300	962170	1109300	162121	Nuclear pore complex protein Nup160 OS=Homo sapiens OX=9606 GN=NUP160 PE=1 SV=3
P23919	33	7	7		169610	500200	1374000	23819	Thymidylate kinase OS=Homo sapiens OX=9606 GN=DTYMK PE=1 SV=4
Q9P015	44	10	10	Carbamidomethylation	942380	180700	1668000	33420	39S ribosomal protein L15 mitochondrial OS=Homo sapiens OX=9606 GN=MRPL15 PE=1 SV=1
Q32MZ4	17	8	8	Carbamidomethylation	142580	45946	156360	89253	Leucine-rich repeat flightless-interacting protein 1 OS=Homo sapiens OX=9606 GN=LRRFIP1 PE=1 SV=2
Q96S52	45	13	13		499800	218100	1346400	61656	GPI transamidase component PIG-S OS=Homo sapiens OX=9606 GN=PIGS PE=1 SV=3
P53384	14	3	3	Carbamidomethylation	1465100	31229	107550	34535	Cytosolic Fe-S cluster assembly factor NUBP1 OS=Homo sapiens OX=9606 GN=NUBP1 PE=1 SV=2
Q9NP97	51	3	3		551630	343130	248810	10922	Dynein light chain roadblock-type 1 OS=Homo sapiens OX=9606 GN=DYNLRB1 PE=1 SV=3
Q9HA77	12	4	4		7866400	640360	145410	62224	Probable cysteine--tRNA ligase mitochondrial OS=Homo sapiens OX=9606 GN=CARS2 PE=1 SV=1
O75477	32	8	5		27816	69430	130300	39171	Erlin-1 OS=Homo sapiens OX=9606 GN=ERLIN1 PE=1 SV=2
P0DMV8	67	45	21	Carbamidomethylation; Oxidation (M)	10328000	8331900	8700200	70052	Heat shock 70 kDa protein 1A OS=Homo sapiens OX=9606 GN=HSPA1A PE=1 SV=1
P0DMV9	67	45	21	Carbamidomethylation; Oxidation (M)	10328000	8331900	8700200	70052	Heat shock 70 kDa protein 1B OS=Homo sapiens OX=9606 GN=HSPA1B PE=1 SV=1
P25398	78	17	17	Carbamidomethylation; Oxidation (M); Acetylation (Protein N-term)	7499300	5677500	3525100	14515	40S ribosomal protein S12 OS=Homo sapiens OX=9606 GN=RPS12 PE=1 SV=3
P30419	31	10	10	Carbamidomethylation	241310	533430	745790	56806	Glycylpeptide N-tetradecanoyltransferase 1 OS=Homo sapiens OX=9606 GN=NMT1 PE=1 SV=2
O75208	35	5	5		1071000	252790	57811	35509	Ubiquinone biosynthesis protein COQ9 mitochondrial OS=Homo sapiens OX=9606 GN=COQ9 PE=1 SV=1
Q6PD62	13	9	9		363370	106580	503280	133502	RNA polymerase-associated protein CTR9 homolog OS=Homo sapiens OX=9606 GN=CTR9 PE=1 SV=1
Q6PK04	21	5	5		5304.9	435710	101630	33231	Coiled-coil domain-containing protein 137 OS=Homo sapiens OX=9606 GN=CCDC137 PE=1 SV=1
Q92600	27	5	5	Carbamidomethylation; Acetylation (Protein N-term)	433950	44686	156580	33631	CCR4-NOT transcription complex subunit 9 OS=Homo sapiens OX=9606 GN=CNOT9 PE=1 SV=1
Q8WYA6	10	4	4	Acetylation (Protein N-term)	41523	38766	176440	65173	Beta-catenin-like protein 1 OS=Homo sapiens OX=9606 GN=CTNNBL1 PE=1 SV=1
Q9Y3B4	46	5	5	Carbamidomethylation	591860	272930	482780	14585	Splicing factor 3B subunit 6 OS=Homo sapiens OX=9606 GN=SF3B6 PE=1 SV=1
Q9P2R7	11	4	4		205790	272370	37788	50317	Succinate--CoA ligase [ADP-forming] subunit beta mitochondrial OS=Homo sapiens OX=9606 GN=SUCLA2 PE=1 SV=3
Q13045	14	12	12	Carbamidomethylation; Acetylation (Protein N-term)	954350	197460	1232800	144751	Protein flightless-1 homolog OS=Homo sapiens OX=9606 GN=FLII PE=1 SV=2
O95168	18	2	2		2109.7	43839	121400	15209	NADH dehydrogenase [ubiquinone] 1 beta subcomplex subunit 4 OS=Homo sapiens OX=9606 GN=NDUFB4 PE=1 SV=3
P49750	5	6	6		21597	288220	38769	241643	YLP motif-containing protein 1 OS=Homo sapiens OX=9606 GN=YLPM1 PE=1 SV=4
P27708	45	68	65	Carbamidomethylation; Oxidation (M); Acetylation (Protein N-term)	5565600	8506900	8384500	242981	CAD protein OS=Homo sapiens OX=9606 GN=CAD PE=1 SV=3
Q15651	42	5	4		841.33	79294	56635	10666	High mobility group nucleosome-binding domain-containing protein 3 OS=Homo sapiens OX=9606 GN=HMGN3 PE=1 SV=2
P58546	64	4	4	Carbamidomethylation; Acetylation (Protein N-term)	309440	792760	375520	12895	Myotrophin OS=Homo sapiens OX=9606 GN=MTPN PE=1 SV=2
Q9NZN4	12	5	4		150140	36210	272500	61162	EH domain-containing protein 2 OS=Homo sapiens OX=9606 GN=EHD2 PE=1 SV=2
P24941	22	5	3		535360	358240	587930	33930	Cyclin-dependent kinase 2 OS=Homo sapiens OX=9606 GN=CDK2 PE=1 SV=2
P10620	27	3	3	Carbamidomethylation	9586.8	68736	128980	17599	Microsomal glutathione S-transferase 1 OS=Homo sapiens OX=9606 GN=MGST1 PE=1 SV=1
Q00577	18	3	3		224040	13045	26238	34911	Transcriptional activator protein Pur-alpha OS=Homo sapiens OX=9606 GN=PURA PE=1 SV=2
P18583	16	25	25	Acetylation (Protein N-term)	4358600	1927900	1455000	263827	Protein SON OS=Homo sapiens OX=9606 GN=SON PE=1 SV=4
Q8IZL8	17	12	12	Acetylation (Protein N-term)	765790	1529800	1499600	119700	Proline- glutamic acid- and leucine-rich protein 1 OS=Homo sapiens OX=9606 GN=PELP1 PE=1 SV=2
Q9BUR5	26	3	3		39111	456820	64213	22285	MICOS complex subunit MIC26 OS=Homo sapiens OX=9606 GN=APOO PE=1 SV=1
Q14247	29	13	13		1305200	1554700	1087700	61586	Src substrate cortactin OS=Homo sapiens OX=9606 GN=CTTN PE=1 SV=2
P47897	43	29	29	Carbamidomethylation; Oxidation (M)	1361800	1537800	1859900	87799	Glutamine--tRNA ligase OS=Homo sapiens OX=9606 GN=QARS1 PE=1 SV=1
P35606	31	22	22	Carbamidomethylation	1519700	1227700	1125300	102487	Coatomer subunit beta' OS=Homo sapiens OX=9606 GN=COPB2 PE=1 SV=2
Q9Y3Y2	24	4	4	Oxidation (M)	77088	218490	118220	26397	Chromatin target of PRMT1 protein OS=Homo sapiens OX=9606 GN=CHTOP PE=1 SV=2
Q86TS9	42	3	3		7004.3	0	100670	13664	39S ribosomal protein L52 mitochondrial OS=Homo sapiens OX=9606 GN=MRPL52 PE=1 SV=2
O15173	20	5	5		33410	523310	380530	23818	Membrane-associated progesterone receptor component 2 OS=Homo sapiens OX=9606 GN=PGRMC2 PE=1 SV=1
Q96A35	27	4	4		72556	11640	6949.6	24915	39S ribosomal protein L24 mitochondrial OS=Homo sapiens OX=9606 GN=MRPL24 PE=1 SV=1
Q9BQC3	17	4	4		97637	32078	227540	52083	2-(3-amino-3-carboxypropyl)histidine synthase subunit 2 OS=Homo sapiens OX=9606 GN=DPH2 PE=1 SV=1
Q96FQ6	68	7	7		389790	352210	419920	11801	Protein S100-A16 OS=Homo sapiens OX=9606 GN=S100A16 PE=1 SV=1
Q9BZE4	38	22	22	Carbamidomethylation	1312400	2155900	1630700	73965	GTP-binding protein 4 OS=Homo sapiens OX=9606 GN=GTPBP4 PE=1 SV=3
Q96IR7	48	11	11	Carbamidomethylation	1161900	834360	1610600	39386	4-hydroxyphenylpyruvate dioxygenase-like protein OS=Homo sapiens OX=9606 GN=HPDL PE=1 SV=1
O14828	22	7	7		723740	1245800	405140	38287	Secretory carrier-associated membrane protein 3 OS=Homo sapiens OX=9606 GN=SCAMP3 PE=1 SV=3
Q86XI2	5	4	4		0	19332	296940	130960	Condensin-2 complex subunit G2 OS=Homo sapiens OX=9606 GN=NCAPG2 PE=1 SV=1
Q92841	54	40	28	Carbamidomethylation; Oxidation (M)	6186500	3954100	4681000	80273	Probable ATP-dependent RNA helicase DDX17 OS=Homo sapiens OX=9606 GN=DDX17 PE=1 SV=2
O60888	41	5	5	Carbamidomethylation	1748000	642850	715060	19116	Protein CutA OS=Homo sapiens OX=9606 GN=CUTA PE=1 SV=2
Q86XZ4	10	4	4		7092.5	90504	58150	59545	Spermatogenesis-associated serine-rich protein 2 OS=Homo sapiens OX=9606 GN=SPATS2 PE=1 SV=1
P25789	55	10	10	Carbamidomethylation; Oxidation (M)	1426100	843040	1203300	29484	Proteasome subunit alpha type-4 OS=Homo sapiens OX=9606 GN=PSMA4 PE=1 SV=1
Q9UNQ2	26	6	6		30620	200240	195650	35236	Probable dimethyladenosine transferase OS=Homo sapiens OX=9606 GN=DIMT1 PE=1 SV=1
Q96G23	20	6	6		1847000	4041900	1942900	44876	Ceramide synthase 2 OS=Homo sapiens OX=9606 GN=CERS2 PE=1 SV=1
P84077	65	14	8	Oxidation (M)	2224200	916720	801410	20697	ADP-ribosylation factor 1 OS=Homo sapiens OX=9606 GN=ARF1 PE=1 SV=2
P61204	65	14	8	Oxidation (M)	2224200	916720	801410	20601	ADP-ribosylation factor 3 OS=Homo sapiens OX=9606 GN=ARF3 PE=1 SV=2
P11717	5	8	8	Carbamidomethylation	370820	475590	177690	274373	Cation-independent mannose-6-phosphate receptor OS=Homo sapiens OX=9606 GN=IGF2R PE=1 SV=3
Q9NX20	18	4	4		3499	6530.3	88517	28449	39S ribosomal protein L16 mitochondrial OS=Homo sapiens OX=9606 GN=MRPL16 PE=1 SV=1
O14975	37	15	15		3530600	2519300	1883700	70312	Very long-chain acyl-CoA synthetase OS=Homo sapiens OX=9606 GN=SLC27A2 PE=1 SV=2
P50213	45	13	13	Carbamidomethylation; Oxidation (M)	2766900	1241700	1243700	39592	Isocitrate dehydrogenase [NAD] subunit alpha mitochondrial OS=Homo sapiens OX=9606 GN=IDH3A PE=1 SV=1
Q9UKX7	27	8	8		281510	123650	169510	50144	Nuclear pore complex protein Nup50 OS=Homo sapiens OX=9606 GN=NUP50 PE=1 SV=2
Q15392	17	8	8		205420	455280	613100	60101	Delta(24)-sterol reductase OS=Homo sapiens OX=9606 GN=DHCR24 PE=1 SV=2
P15586	17	7	7		110220	404490	706820	62082	N-acetylglucosamine-6-sulfatase OS=Homo sapiens OX=9606 GN=GNS PE=1 SV=3
P05161	54	8	8	Carbamidomethylation; Oxidation (M)	2801400	1785600	397230	17888	Ubiquitin-like protein ISG15 OS=Homo sapiens OX=9606 GN=ISG15 PE=1 SV=5
P22102	47	31	31	Carbamidomethylation; Oxidation (M)	2709200	931030	5089500	107767	Trifunctional purine biosynthetic protein adenosine-3 OS=Homo sapiens OX=9606 GN=GART PE=1 SV=1
Q9BW27	10	5	5		356800	33128	29958	75019	Nuclear pore complex protein Nup85 OS=Homo sapiens OX=9606 GN=NUP85 PE=1 SV=1
Q9P0M9	36	4	4		0	7025.5	6366.4	16073	39S ribosomal protein L27 mitochondrial OS=Homo sapiens OX=9606 GN=MRPL27 PE=1 SV=1
Q14195	37	14	11	Carbamidomethylation; Oxidation (M)	987920	1015800	384580	61963	Dihydropyrimidinase-related protein 3 OS=Homo sapiens OX=9606 GN=DPYSL3 PE=1 SV=1
Q06787	19	9	8		1505900	867180	383480	71175	Synaptic functional regulator FMR1 OS=Homo sapiens OX=9606 GN=FMR1 PE=1 SV=1
P46063	9	5	5		7780.8	182140	143360	73457	ATP-dependent DNA helicase Q1 OS=Homo sapiens OX=9606 GN=RECQL PE=1 SV=3
Q92598	54	33	30	Carbamidomethylation; Acetylation (Protein N-term)	2517200	1072500	2453400	96865	Heat shock protein 105 kDa OS=Homo sapiens OX=9606 GN=HSPH1 PE=1 SV=1
Q9UJU6	35	11	11	Carbamidomethylation; Oxidation (M)	478370	285490	252100	48207	Drebrin-like protein OS=Homo sapiens OX=9606 GN=DBNL PE=1 SV=1
O60306	13	11	11		925100	119090	546550	171294	RNA helicase aquarius OS=Homo sapiens OX=9606 GN=AQR PE=1 SV=4
P13995	29	5	5		19771	72034	217880	37895	Bifunctional methylenetetrahydrofolate dehydrogenase/cyclohydrolase mitochondrial OS=Homo sapiens OX=9606 GN=MTHFD2 PE=1 SV=2
P63220	65	7	7	Carbamidomethylation; Oxidation (M); Acetylation (Protein N-term)	2735500	3749200	6188800	9111	40S ribosomal protein S21 OS=Homo sapiens OX=9606 GN=RPS21 PE=1 SV=1
O95563	31	3	3		0	3679.8	39413	14279	Mitochondrial pyruvate carrier 2 OS=Homo sapiens OX=9606 GN=MPC2 PE=1 SV=1
Q05639	62	26	7	Carbamidomethylation; Oxidation (M)	382240	97208	1982100	50470	Elongation factor 1-alpha 2 OS=Homo sapiens OX=9606 GN=EEF1A2 PE=1 SV=1
P68871	20	3	3		1066400	1617100	3172400	15998	Hemoglobin subunit beta OS=Homo sapiens OX=9606 GN=HBB PE=1 SV=2
P38646	69	57	53	Carbamidomethylation; Oxidation (M)	21251000	20351000	15250000	73681	Stress-70 protein mitochondrial OS=Homo sapiens OX=9606 GN=HSPA9 PE=1 SV=2
Q96G03	10	3	3		217670	75730	50760	68283	Phosphoglucomutase-2 OS=Homo sapiens OX=9606 GN=PGM2 PE=1 SV=4
Q96T76	9	5	5		41680	0	186760	113289	MMS19 nucleotide excision repair protein homolog OS=Homo sapiens OX=9606 GN=MMS19 PE=1 SV=2
Q9Y4C8	13	10	10		1061000	634250	417660	107332	Probable RNA-binding protein 19 OS=Homo sapiens OX=9606 GN=RBM19 PE=1 SV=3
Q9Y2Q5	50	3	3		19879	29570	4790	13508	Ragulator complex protein LAMTOR2 OS=Homo sapiens OX=9606 GN=LAMTOR2 PE=1 SV=1
O00411	11	8	8		468520	47798	109240	138620	DNA-directed RNA polymerase mitochondrial OS=Homo sapiens OX=9606 GN=POLRMT PE=1 SV=2
Q8NF37	17	7	7	Carbamidomethylation	426900	566410	1545200	59151	Lysophosphatidylcholine acyltransferase 1 OS=Homo sapiens OX=9606 GN=LPCAT1 PE=1 SV=2
Q99729	24	11	11	Oxidation (M)	3279900	3605000	29981000	36225	Heterogeneous nuclear ribonucleoprotein A/B OS=Homo sapiens OX=9606 GN=HNRNPAB PE=1 SV=2
O00165	33	4	4		59847	0	0	31621	HCLS1-associated protein X-1 OS=Homo sapiens OX=9606 GN=HAX1 PE=1 SV=2
Q9H501	9	5	5		19860	15627	79204	98796	ESF1 homolog OS=Homo sapiens OX=9606 GN=ESF1 PE=1 SV=1
Q9BRX8	28	7	7		18507	284130	228110	25764	Peroxiredoxin-like 2A OS=Homo sapiens OX=9606 GN=PRXL2A PE=1 SV=3
Q8NBJ7	33	8	8	Carbamidomethylation	676810	605260	132780	33843	Inactive C-alpha-formylglycine-generating enzyme 2 OS=Homo sapiens OX=9606 GN=SUMF2 PE=1 SV=2
O14646	6	5	4		42571	0	11236	196687	Chromodomain-helicase-DNA-binding protein 1 OS=Homo sapiens OX=9606 GN=CHD1 PE=1 SV=2
P45973	53	9	8	Carbamidomethylation; Oxidation (M)	130270	390640	234940	22225	Chromobox protein homolog 5 OS=Homo sapiens OX=9606 GN=CBX5 PE=1 SV=1
O14925	38	3	3		31284	19163	7217.9	21943	Mitochondrial import inner membrane translocase subunit Tim23 OS=Homo sapiens OX=9606 GN=TIMM23 PE=1 SV=1
Q9BQ67	63	16	16	Carbamidomethylation	600740	1202200	1130700	49419	Glutamate-rich WD repeat-containing protein 1 OS=Homo sapiens OX=9606 GN=GRWD1 PE=1 SV=1
Q9H061	22	3	3		5939.2	0	144850	21527	Transmembrane protein 126A OS=Homo sapiens OX=9606 GN=TMEM126A PE=1 SV=1
Q96ST2	10	7	7		27554	51099	319950	91955	Protein IWS1 homolog OS=Homo sapiens OX=9606 GN=IWS1 PE=1 SV=2
O75940	24	3	3		29668	0	0	26711	Survival of motor neuron-related-splicing factor 30 OS=Homo sapiens OX=9606 GN=SMNDC1 PE=1 SV=1
P62993	12	3	3		44038	131230	273980	25206	Growth factor receptor-bound protein 2 OS=Homo sapiens OX=9606 GN=GRB2 PE=1 SV=1
O43709	17	3	3		202120	46340	12136	31880	Probable 18S rRNA (guanine-N(7))-methyltransferase OS=Homo sapiens OX=9606 GN=BUD23 PE=1 SV=2
Q8WUK0	18	3	3	Acetylation (Protein N-term)	99575	272080	99551	22844	Phosphatidylglycerophosphatase and protein-tyrosine phosphatase 1 OS=Homo sapiens OX=9606 GN=PTPMT1 PE=1 SV=1
Q6P2E9	26	17	17		1750000	381040	915760	151661	Enhancer of mRNA-decapping protein 4 OS=Homo sapiens OX=9606 GN=EDC4 PE=1 SV=1
Q99567	21	7	7	Acetylation (Protein N-term)	93283	2062.2	356990	83542	Nuclear pore complex protein Nup88 OS=Homo sapiens OX=9606 GN=NUP88 PE=1 SV=2
Q8IY37	15	12	12		1083600	1023100	1248100	129545	Probable ATP-dependent RNA helicase DHX37 OS=Homo sapiens OX=9606 GN=DHX37 PE=1 SV=1
Q96EY7	18	8	8		473090	53162	1216500	78550	Pentatricopeptide repeat domain-containing protein 3 mitochondrial OS=Homo sapiens OX=9606 GN=PTCD3 PE=1 SV=3
O43264	6	3	3	Acetylation (Protein N-term)	163750	0	27657	88830	Centromere/kinetochore protein zw10 homolog OS=Homo sapiens OX=9606 GN=ZW10 PE=1 SV=3
Q96I25	10	3	3	Acetylation (Protein N-term)	8492.5	0	0	44962	Splicing factor 45 OS=Homo sapiens OX=9606 GN=RBM17 PE=1 SV=1
P27144	55	8	8		9959.7	65034	368900	25268	Adenylate kinase 4 mitochondrial OS=Homo sapiens OX=9606 GN=AK4 PE=1 SV=1
Q13641	14	5	5		757700	2093100	1535400	46032	Trophoblast glycoprotein OS=Homo sapiens OX=9606 GN=TPBG PE=1 SV=1
Q9Y446	15	7	7		845450	1179400	453630	87082	Plakophilin-3 OS=Homo sapiens OX=9606 GN=PKP3 PE=1 SV=1
P63279	23	5	5		69373	476850	451820	18007	SUMO-conjugating enzyme UBC9 OS=Homo sapiens OX=9606 GN=UBE2I PE=1 SV=1
P61077	36	3	3	Carbamidomethylation	866430	242280	837770	16687	Ubiquitin-conjugating enzyme E2 D3 OS=Homo sapiens OX=9606 GN=UBE2D3 PE=1 SV=1
P62837	36	3	3	Carbamidomethylation	866430	242280	837770	16735	Ubiquitin-conjugating enzyme E2 D2 OS=Homo sapiens OX=9606 GN=UBE2D2 PE=1 SV=1
Q53EL6	15	4	4		1030100	44996	212950	51735	Programmed cell death protein 4 OS=Homo sapiens OX=9606 GN=PDCD4 PE=1 SV=2
P14209	13	2	2		3325	117340	39294	18848	CD99 antigen OS=Homo sapiens OX=9606 GN=CD99 PE=1 SV=1
Q9H5Q4	19	6	6		476170	114510	153990	45349	Dimethyladenosine transferase 2 mitochondrial OS=Homo sapiens OX=9606 GN=TFB2M PE=1 SV=1
Q7Z2W9	24	3	3		0	0	204030	22815	39S ribosomal protein L21 mitochondrial OS=Homo sapiens OX=9606 GN=MRPL21 PE=1 SV=2
Q9BX40	21	3	3		0	0	36044	42071	Protein LSM14 homolog B OS=Homo sapiens OX=9606 GN=LSM14B PE=1 SV=1
P48444	34	13	13	Carbamidomethylation	1243200	441810	532270	57210	Coatomer subunit delta OS=Homo sapiens OX=9606 GN=ARCN1 PE=1 SV=1
O43181	27	3	3		40026	131440	18014	20108	NADH dehydrogenase [ubiquinone] iron-sulfur protein 4 mitochondrial OS=Homo sapiens OX=9606 GN=NDUFS4 PE=1 SV=1
Q9H773	28	5	5	Acetylation (Protein N-term)	93348	262280	815660	18681	dCTP pyrophosphatase 1 OS=Homo sapiens OX=9606 GN=DCTPP1 PE=1 SV=1
O94973	21	12	5	Carbamidomethylation	878040	3725	186340	103960	AP-2 complex subunit alpha-2 OS=Homo sapiens OX=9606 GN=AP2A2 PE=1 SV=2
Q9NVT9	28	4	4		13540	9820.4	255340	31281	Armadillo repeat-containing protein 1 OS=Homo sapiens OX=9606 GN=ARMC1 PE=1 SV=1
P13804	74	17	17	Carbamidomethylation	3210000	2303100	2603400	35080	Electron transfer flavoprotein subunit alpha mitochondrial OS=Homo sapiens OX=9606 GN=ETFA PE=1 SV=1
Q5JRX3	8	5	5		1194200	173340	579590	117413	Presequence protease mitochondrial OS=Homo sapiens OX=9606 GN=PITRM1 PE=1 SV=3
Q9NVH1	25	9	9	Carbamidomethylation; Acetylation (Protein N-term)	734800	201440	831770	63278	DnaJ homolog subfamily C member 11 OS=Homo sapiens OX=9606 GN=DNAJC11 PE=1 SV=2
P02749	5	2	2	Carbamidomethylation	6733.6	207960	83028	38298	Beta-2-glycoprotein 1 OS=Homo sapiens OX=9606 GN=APOH PE=1 SV=3
Q14254	41	13	13		485490	933780	2144000	47064	Flotillin-2 OS=Homo sapiens OX=9606 GN=FLOT2 PE=1 SV=2
O43920	16	2	2		0	52973	45091	12517	NADH dehydrogenase [ubiquinone] iron-sulfur protein 5 OS=Homo sapiens OX=9606 GN=NDUFS5 PE=1 SV=3
Q8NBQ5	10	2	2		1009100	37558	36889	32936	Estradiol 17-beta-dehydrogenase 11 OS=Homo sapiens OX=9606 GN=HSD17B11 PE=1 SV=3
O43865	17	5	5	Carbamidomethylation; Oxidation (M); Acetylation (Protein N-term)	1993500	408910	549140	58952	S-adenosylhomocysteine hydrolase-like protein 1 OS=Homo sapiens OX=9606 GN=AHCYL1 PE=1 SV=2
P05114	61	10	10		60068	96051	72124	10659	Non-histone chromosomal protein HMG-14 OS=Homo sapiens OX=9606 GN=HMGN1 PE=1 SV=3
Q9H307	21	15	15		845810	1459300	1261200	81628	Pinin OS=Homo sapiens OX=9606 GN=PNN PE=1 SV=5
Q9BYG3	57	14	14	Acetylation (Protein N-term)	5329300	2133800	3379400	34222	MKI67 FHA domain-interacting nucleolar phosphoprotein OS=Homo sapiens OX=9606 GN=NIFK PE=1 SV=1
O15347	46	9	9	Carbamidomethylation	261780	659740	2223000	22980	High mobility group protein B3 OS=Homo sapiens OX=9606 GN=HMGB3 PE=1 SV=4
Q8IY17	10	7	7		1604700	87327	780070	150953	Patatin-like phospholipase domain-containing protein 6 OS=Homo sapiens OX=9606 GN=PNPLA6 PE=1 SV=3
Q15005	46	8	8	Carbamidomethylation	342460	502270	163690	25003	Signal peptidase complex subunit 2 OS=Homo sapiens OX=9606 GN=SPCS2 PE=1 SV=3
P82979	39	7	7	Acetylation (Protein N-term)	37136	903970	582260	23671	SAP domain-containing ribonucleoprotein OS=Homo sapiens OX=9606 GN=SARNP PE=1 SV=3
Q00403	17	3	3		240120	10232	125830	34833	Transcription initiation factor IIB OS=Homo sapiens OX=9606 GN=GTF2B PE=1 SV=1
Q9BY44	45	18	18	Carbamidomethylation	2537400	1008300	1390900	64990	Eukaryotic translation initiation factor 2A OS=Homo sapiens OX=9606 GN=EIF2A PE=1 SV=3
Q9Y320	21	4	4		35130	14161	54182	34038	Thioredoxin-related transmembrane protein 2 OS=Homo sapiens OX=9606 GN=TMX2 PE=1 SV=1
Q8IXM3	64	6	6	Oxidation (M); Acetylation (Protein N-term)	1535000	41858	839160	15383	39S ribosomal protein L41 mitochondrial OS=Homo sapiens OX=9606 GN=MRPL41 PE=1 SV=1
P01008	8	4	4		316890	903930	295650	52602	Antithrombin-III OS=Homo sapiens OX=9606 GN=SERPINC1 PE=1 SV=1
O95297	16	4	4		16871	648260	1144200	29082	Myelin protein zero-like protein 1 OS=Homo sapiens OX=9606 GN=MPZL1 PE=1 SV=1
P55209	31	13	11	Oxidation (M); Acetylation (Protein N-term)	9019900	2529700	3327500	45374	Nucleosome assembly protein 1-like 1 OS=Homo sapiens OX=9606 GN=NAP1L1 PE=1 SV=1
Q6UN15	16	7	7		14204	101060	627720	66526	Pre-mRNA 3'-end-processing factor FIP1 OS=Homo sapiens OX=9606 GN=FIP1L1 PE=1 SV=1
P61026	42	9	5		546280	509850	237950	22541	Ras-related protein Rab-10 OS=Homo sapiens OX=9606 GN=RAB10 PE=1 SV=1
P68402	21	3	3	Carbamidomethylation	504800	150370	952580	25569	Platelet-activating factor acetylhydrolase IB subunit alpha2 OS=Homo sapiens OX=9606 GN=PAFAH1B2 PE=1 SV=1
P11172	14	4	4	Carbamidomethylation	478690	98277	123370	52222	Uridine 5'-monophosphate synthase OS=Homo sapiens OX=9606 GN=UMPS PE=1 SV=1
Q14980	31	46	45	Carbamidomethylation	5591100	4266000	3031600	238257	Nuclear mitotic apparatus protein 1 OS=Homo sapiens OX=9606 GN=NUMA1 PE=1 SV=2
P55884	50	29	29	Carbamidomethylation; Acetylation (Protein N-term)	12272000	4409000	1931000	92482	Eukaryotic translation initiation factor 3 subunit B OS=Homo sapiens OX=9606 GN=EIF3B PE=1 SV=3
Q96IU4	22	3	3	Oxidation (M)	2440400	119300	390330	22346	Protein ABHD14B OS=Homo sapiens OX=9606 GN=ABHD14B PE=1 SV=1
Q13813	50	86	86	Carbamidomethylation; Oxidation (M)	6855000	4952900	6595300	284538	Spectrin alpha chain non-erythrocytic 1 OS=Homo sapiens OX=9606 GN=SPTAN1 PE=1 SV=3
Q12849	37	10	10		127340	202440	53888	53126	G-rich sequence factor 1 OS=Homo sapiens OX=9606 GN=GRSF1 PE=1 SV=3
P84095	31	4	3	Carbamidomethylation	0	7043.8	25137	21308	Rho-related GTP-binding protein RhoG OS=Homo sapiens OX=9606 GN=RHOG PE=1 SV=1
Q9NPA0	35	5	5		277130	118840	461650	26471	ER membrane protein complex subunit 7 OS=Homo sapiens OX=9606 GN=EMC7 PE=1 SV=1
Q9UKM7	8	3	3		46189	16480	60928	79580	Endoplasmic reticulum mannosyl-oligosaccharide 1 2-alpha-mannosidase OS=Homo sapiens OX=9606 GN=MAN1B1 PE=1 SV=2
Q8IWS0	14	3	3	Carbamidomethylation	0	1566.8	4926.8	41290	PHD finger protein 6 OS=Homo sapiens OX=9606 GN=PHF6 PE=1 SV=1
P18846	13	2	2		0	99474	26273	29233	Cyclic AMP-dependent transcription factor ATF-1 OS=Homo sapiens OX=9606 GN=ATF1 PE=1 SV=2
Q6P996	19	8	8	Carbamidomethylation	734850	95371	358540	86707	Pyridoxal-dependent decarboxylase domain-containing protein 1 OS=Homo sapiens OX=9606 GN=PDXDC1 PE=1 SV=2
Q9Y5K5	38	10	10	Carbamidomethylation	644780	543880	741470	37607	Ubiquitin carboxyl-terminal hydrolase isozyme L5 OS=Homo sapiens OX=9606 GN=UCHL5 PE=1 SV=3
Q03468	3	3	3		55926	55764	319530	168415	DNA excision repair protein ERCC-6 OS=Homo sapiens OX=9606 GN=ERCC6 PE=1 SV=1
Q10471	40	21	21	Carbamidomethylation; Oxidation (M)	3757100	2649800	2437000	64733	Polypeptide N-acetylgalactosaminyltransferase 2 OS=Homo sapiens OX=9606 GN=GALNT2 PE=1 SV=1
Q9NUQ9	27	6	6		57922	26854	84604	36748	CYFIP-related Rac1 interactor B OS=Homo sapiens OX=9606 GN=CYRIB PE=1 SV=1
O75531	55	6	6	Oxidation (M)	6398100	1988300	4756300	10059	Barrier-to-autointegration factor OS=Homo sapiens OX=9606 GN=BANF1 PE=1 SV=1
Q01085	26	6	4	Carbamidomethylation	1350600	73932	875630	41591	Nucleolysin TIAR OS=Homo sapiens OX=9606 GN=TIAL1 PE=1 SV=1
P78346	41	7	7	Carbamidomethylation	224550	38116	79319	29321	Ribonuclease P protein subunit p30 OS=Homo sapiens OX=9606 GN=RPP30 PE=1 SV=1
P01893	24	7	2	Carbamidomethylation	148560	44490	59720	40892	Putative HLA class I histocompatibility antigen alpha chain H OS=Homo sapiens OX=9606 GN=HLA-H PE=5 SV=3
P21964	45	14	14	Carbamidomethylation	524780	2056600	562220	30037	Catechol O-methyltransferase OS=Homo sapiens OX=9606 GN=COMT PE=1 SV=2
P55036	42	11	11	Carbamidomethylation	864690	684600	842620	40737	26S proteasome non-ATPase regulatory subunit 4 OS=Homo sapiens OX=9606 GN=PSMD4 PE=1 SV=1
P13674	44	15	15	Carbamidomethylation	1213500	311880	2007800	61049	Prolyl 4-hydroxylase subunit alpha-1 OS=Homo sapiens OX=9606 GN=P4HA1 PE=1 SV=2
Q9H0S4	52	16	16	Carbamidomethylation; Acetylation (Protein N-term)	2369200	2535500	969210	50647	Probable ATP-dependent RNA helicase DDX47 OS=Homo sapiens OX=9606 GN=DDX47 PE=1 SV=1
P38435	5	3	3		0	0	40257	87561	Vitamin K-dependent gamma-carboxylase OS=Homo sapiens OX=9606 GN=GGCX PE=1 SV=2
O60684	33	14	8	Carbamidomethylation; Acetylation (Protein N-term)	52599	463800	190150	60030	Importin subunit alpha-7 OS=Homo sapiens OX=9606 GN=KPNA6 PE=1 SV=1
Q9NRG0	46	4	4	Carbamidomethylation	8078.2	13891	37582	14711	Chromatin accessibility complex protein 1 OS=Homo sapiens OX=9606 GN=CHRAC1 PE=1 SV=1
Q9NVJ2	35	4	4		31898	71287	563690	21539	ADP-ribosylation factor-like protein 8B OS=Homo sapiens OX=9606 GN=ARL8B PE=1 SV=1
Q4G176	14	4	4		13449	0	4877.7	64130	Malonate--CoA ligase ACSF3 mitochondrial OS=Homo sapiens OX=9606 GN=ACSF3 PE=1 SV=3
Q9UHD1	23	5	5	Carbamidomethylation	43371	101570	333090	37490	Cysteine and histidine-rich domain-containing protein 1 OS=Homo sapiens OX=9606 GN=CHORDC1 PE=1 SV=2
P09923	25	9	5	Carbamidomethylation	1378400	142630	391550	56812	Intestinal-type alkaline phosphatase OS=Homo sapiens OX=9606 GN=ALPI PE=1 SV=2
P42345	9	12	12	Oxidation (M); Acetylation (Protein N-term)	603060	457000	107070	288890	Serine/threonine-protein kinase mTOR OS=Homo sapiens OX=9606 GN=MTOR PE=1 SV=1
O00116	51	25	25	Carbamidomethylation	3158800	1545600	2420600	72912	Alkyldihydroxyacetonephosphate synthase peroxisomal OS=Homo sapiens OX=9606 GN=AGPS PE=1 SV=1
Q14558	35	8	8		680000	142800	152490	39394	Phosphoribosyl pyrophosphate synthase-associated protein 1 OS=Homo sapiens OX=9606 GN=PRPSAP1 PE=1 SV=2
P05026	31	8	8	Carbamidomethylation	674520	545200	476450	35061	Sodium/potassium-transporting ATPase subunit beta-1 OS=Homo sapiens OX=9606 GN=ATP1B1 PE=1 SV=1
P26583	37	7	5	Carbamidomethylation	87260	374210	3336100	24034	High mobility group protein B2 OS=Homo sapiens OX=9606 GN=HMGB2 PE=1 SV=2
Q9NRV9	36	5	5		800490	531300	215890	21097	Heme-binding protein 1 OS=Homo sapiens OX=9606 GN=HEBP1 PE=1 SV=1
Q05519	18	6	6		747910	1073700	2582200	53542	Serine/arginine-rich splicing factor 11 OS=Homo sapiens OX=9606 GN=SRSF11 PE=1 SV=1
Q9HCN8	49	5	5		454730	46681	70990	23598	Stromal cell-derived factor 2-like protein 1 OS=Homo sapiens OX=9606 GN=SDF2L1 PE=1 SV=2
O60427	10	2	2		31363	0	0	51964	Acyl-CoA (8-3)-desaturase OS=Homo sapiens OX=9606 GN=FADS1 PE=1 SV=3
Q5T8P6	5	4	3		0	97234	92334	113597	RNA-binding protein 26 OS=Homo sapiens OX=9606 GN=RBM26 PE=1 SV=3
Q14134	24	10	10		315020	409720	856170	65835	Tripartite motif-containing protein 29 OS=Homo sapiens OX=9606 GN=TRIM29 PE=1 SV=2
Q9BRJ7	24	3	3	Carbamidomethylation	12268	0	128940	23338	Tudor-interacting repair regulator protein OS=Homo sapiens OX=9606 GN=NUDT16L1 PE=1 SV=1
Q9UI09	37	4	4	Acetylation (Protein N-term)	0	40492	111220	17114	NADH dehydrogenase [ubiquinone] 1 alpha subcomplex subunit 12 OS=Homo sapiens OX=9606 GN=NDUFA12 PE=1 SV=1
P62820	81	15	6	Oxidation (M); Acetylation (Protein N-term)	872510	626840	884220	22678	Ras-related protein Rab-1A OS=Homo sapiens OX=9606 GN=RAB1A PE=1 SV=3
P09488	36	7	4	Carbamidomethylation	2758.6	319920	313270	25712	Glutathione S-transferase Mu 1 OS=Homo sapiens OX=9606 GN=GSTM1 PE=1 SV=3
Q8WXA9	10	3	3		6271.6	20202	159640	59380	Splicing regulatory glutamine/lysine-rich protein 1 OS=Homo sapiens OX=9606 GN=SREK1 PE=1 SV=1
Q969Y2	5	1	1		621340	62360	43769	52058	tRNA modification GTPase GTPBP3 mitochondrial OS=Homo sapiens OX=9606 GN=GTPBP3 PE=1 SV=2
Q9NUU7	37	14	3	Carbamidomethylation; Oxidation (M); Acetylation (Protein N-term)	1669.1	76060	393980	53975	ATP-dependent RNA helicase DDX19A OS=Homo sapiens OX=9606 GN=DDX19A PE=1 SV=1
Q16204	8	3	3		135800	540380	81553	53291	Coiled-coil domain-containing protein 6 OS=Homo sapiens OX=9606 GN=CCDC6 PE=1 SV=2
Q86Y56	22	11	11	Acetylation (Protein N-term)	241960	259520	381960	93521	Dynein axonemal assembly factor 5 OS=Homo sapiens OX=9606 GN=DNAAF5 PE=1 SV=4
Q9P2I0	10	5	5		47155	0	432190	88487	Cleavage and polyadenylation specificity factor subunit 2 OS=Homo sapiens OX=9606 GN=CPSF2 PE=1 SV=2
P60660	84	12	10	Carbamidomethylation; Oxidation (M); Acetylation (Protein N-term)	6528800	6430600	2083300	16930	Myosin light polypeptide 6 OS=Homo sapiens OX=9606 GN=MYL6 PE=1 SV=2
P78549	32	5	5		6953200	867380	2705200	34390	Endonuclease III-like protein 1 OS=Homo sapiens OX=9606 GN=NTHL1 PE=1 SV=2
Q96ME7	6	2	2		15016	0	522100	64682	Zinc finger protein 512 OS=Homo sapiens OX=9606 GN=ZNF512 PE=1 SV=2
P37235	50	10	10		72284	296410	876080	22313	Hippocalcin-like protein 1 OS=Homo sapiens OX=9606 GN=HPCAL1 PE=1 SV=3
P82930	44	8	8		80901	84330	232120	25650	28S ribosomal protein S34 mitochondrial OS=Homo sapiens OX=9606 GN=MRPS34 PE=1 SV=2
Q9C005	57	3	3	Acetylation (Protein N-term)	40512	47890	64419	11250	Protein dpy-30 homolog OS=Homo sapiens OX=9606 GN=DPY30 PE=1 SV=1
Q9Y4W6	18	9	9	Carbamidomethylation	294720	253140	538230	88584	AFG3-like protein 2 OS=Homo sapiens OX=9606 GN=AFG3L2 PE=1 SV=2
Q7Z2W4	35	22	22		2232100	1286900	1219400	101431	Zinc finger CCCH-type antiviral protein 1 OS=Homo sapiens OX=9606 GN=ZC3HAV1 PE=1 SV=3
P42695	6	6	6		126460	0	44135	168890	Condensin-2 complex subunit D3 OS=Homo sapiens OX=9606 GN=NCAPD3 PE=1 SV=2
O00217	24	5	5		48160	304260	486900	23705	NADH dehydrogenase [ubiquinone] iron-sulfur protein 8 mitochondrial OS=Homo sapiens OX=9606 GN=NDUFS8 PE=1 SV=1
P50991	70	31	29	Carbamidomethylation; Oxidation (M)	3879600	2895700	5358200	57924	T-complex protein 1 subunit delta OS=Homo sapiens OX=9606 GN=CCT4 PE=1 SV=4
Q9HCC0	21	7	7	Carbamidomethylation	504840	72123	120770	61333	Methylcrotonoyl-CoA carboxylase beta chain mitochondrial OS=Homo sapiens OX=9606 GN=MCCC2 PE=1 SV=1
P49821	16	5	5		26979	61884	113620	50817	NADH dehydrogenase [ubiquinone] flavoprotein 1 mitochondrial OS=Homo sapiens OX=9606 GN=NDUFV1 PE=1 SV=4
P30626	64	7	7	Carbamidomethylation; Acetylation (Protein N-term)	1043900	2239100	441450	21676	Sorcin OS=Homo sapiens OX=9606 GN=SRI PE=1 SV=1
Q92733	21	5	5		14739	11992	268640	52418	Proline-rich protein PRCC OS=Homo sapiens OX=9606 GN=PRCC PE=1 SV=1
P52701	11	11	11		2905600	1080100	361340	152785	DNA mismatch repair protein Msh6 OS=Homo sapiens OX=9606 GN=MSH6 PE=1 SV=2
Q9UPN9	5	4	4		923350	69105	430020	122533	E3 ubiquitin-protein ligase TRIM33 OS=Homo sapiens OX=9606 GN=TRIM33 PE=1 SV=3
Q13868	23	4	4		381360	217900	76648	32789	Exosome complex component RRP4 OS=Homo sapiens OX=9606 GN=EXOSC2 PE=1 SV=2
Q9BZG1	15	3	3		9492.9	8849.2	57464	29044	Ras-related protein Rab-34 OS=Homo sapiens OX=9606 GN=RAB34 PE=1 SV=1
P33176	35	20	20	Carbamidomethylation	1558500	493680	609750	109685	Kinesin-1 heavy chain OS=Homo sapiens OX=9606 GN=KIF5B PE=1 SV=1
Q8N5N7	42	4	4		144300	117160	65735	18325	39S ribosomal protein L50 mitochondrial OS=Homo sapiens OX=9606 GN=MRPL50 PE=1 SV=2
P15559	43	9	9		1935200	2105300	411400	30868	NAD(P)H dehydrogenase [quinone] 1 OS=Homo sapiens OX=9606 GN=NQO1 PE=1 SV=1
Q86WA8	6	3	3		4791.3	4510.8	18907	94617	Lon protease homolog 2 peroxisomal OS=Homo sapiens OX=9606 GN=LONP2 PE=1 SV=1
P82675	15	4	4		480740	43617	41433	48007	28S ribosomal protein S5 mitochondrial OS=Homo sapiens OX=9606 GN=MRPS5 PE=1 SV=2
O15160	24	6	6		742240	530500	1484200	39250	DNA-directed RNA polymerases I and III subunit RPAC1 OS=Homo sapiens OX=9606 GN=POLR1C PE=1 SV=1
Q9BY77	43	11	11	Acetylation (Protein N-term)	144790	95482	289190	46089	Polymerase delta-interacting protein 3 OS=Homo sapiens OX=9606 GN=POLDIP3 PE=1 SV=2
Q14671	7	5	4		59987	9439.1	8073.9	126473	Pumilio homolog 1 OS=Homo sapiens OX=9606 GN=PUM1 PE=1 SV=3
Q3ZCQ8	21	6	6		353160	224070	192260	39646	Mitochondrial import inner membrane translocase subunit TIM50 OS=Homo sapiens OX=9606 GN=TIMM50 PE=1 SV=2
P35221	40	22	22	Carbamidomethylation; Oxidation (M)	2323200	908250	1395700	100071	Catenin alpha-1 OS=Homo sapiens OX=9606 GN=CTNNA1 PE=1 SV=1
P11182	18	6	6	Carbamidomethylation	84048	27323	151210	53487	Lipoamide acyltransferase component of branched-chain alpha-keto acid dehydrogenase complex mitochondrial OS=Homo sapiens OX=9606 GN=DBT PE=1 SV=3
Q8N163	28	16	16	Carbamidomethylation	861100	412610	1168000	102902	Cell cycle and apoptosis regulator protein 2 OS=Homo sapiens OX=9606 GN=CCAR2 PE=1 SV=2
Q96AX1	11	3	3		13372	0	0	67611	Vacuolar protein sorting-associated protein 33A OS=Homo sapiens OX=9606 GN=VPS33A PE=1 SV=1
Q5VYK3	13	16	16	Carbamidomethylation	253410	109860	336180	204289	Proteasome adapter and scaffold protein ECM29 OS=Homo sapiens OX=9606 GN=ECPAS PE=1 SV=2
P40937	27	6	6		371650	31914	347240	38497	Replication factor C subunit 5 OS=Homo sapiens OX=9606 GN=RFC5 PE=1 SV=1
O43809	59	11	11		1159000	2034700	2064200	26227	Cleavage and polyadenylation specificity factor subunit 5 OS=Homo sapiens OX=9606 GN=NUDT21 PE=1 SV=1
Q96SK2	15	4	4		375990	39431	0	62922	Transmembrane protein 209 OS=Homo sapiens OX=9606 GN=TMEM209 PE=1 SV=2
O75691	13	26	26		3268000	2166500	1712100	318385	Small subunit processome component 20 homolog OS=Homo sapiens OX=9606 GN=UTP20 PE=1 SV=3
Q9UKF6	13	5	5		14086	2948	85717	77486	Cleavage and polyadenylation specificity factor subunit 3 OS=Homo sapiens OX=9606 GN=CPSF3 PE=1 SV=1
Q8IYB3	13	8	8		698340	256070	308860	102335	Serine/arginine repetitive matrix protein 1 OS=Homo sapiens OX=9606 GN=SRRM1 PE=1 SV=2
Q8IVF2	4	16	15		3026300	471710	474210	616641	Protein AHNAK2 OS=Homo sapiens OX=9606 GN=AHNAK2 PE=1 SV=2
O75381	8	3	3		0	53946	8044	41237	Peroxisomal membrane protein PEX14 OS=Homo sapiens OX=9606 GN=PEX14 PE=1 SV=1
A6NDG6	35	8	8	Carbamidomethylation; Acetylation (Protein N-term)	199810	215330	875220	34006	Glycerol-3-phosphate phosphatase OS=Homo sapiens OX=9606 GN=PGP PE=1 SV=1
Q9UI30	48	5	5	Carbamidomethylation	803650	751140	2168500	14199	Multifunctional methyltransferase subunit TRM112-like protein OS=Homo sapiens OX=9606 GN=TRMT112 PE=1 SV=1
P35250	36	8	8		2170800	181080	295250	39157	Replication factor C subunit 2 OS=Homo sapiens OX=9606 GN=RFC2 PE=1 SV=3
Q9BW60	5	1	1	Oxidation (M); Acetylation (Protein N-term)	47994	0	0	32663	Elongation of very long chain fatty acids protein 1 OS=Homo sapiens OX=9606 GN=ELOVL1 PE=1 SV=1
Q13111	4	2	2		4184.6	0	148800	106910	Chromatin assembly factor 1 subunit A OS=Homo sapiens OX=9606 GN=CHAF1A PE=1 SV=3
Q8NFW8	9	3	3	Acetylation (Protein N-term)	153470	193450	432670	48379	N-acylneuraminate cytidylyltransferase OS=Homo sapiens OX=9606 GN=CMAS PE=1 SV=2
Q9NPA8	26	2	2		147330	127460	6802.2	11529	Transcription and mRNA export factor ENY2 OS=Homo sapiens OX=9606 GN=ENY2 PE=1 SV=1
Q8N1F7	28	17	17	Oxidation (M)	1172500	478420	904290	93488	Nuclear pore complex protein Nup93 OS=Homo sapiens OX=9606 GN=NUP93 PE=1 SV=2
Q08752	18	5	5	Carbamidomethylation; Acetylation (Protein N-term)	596500	142070	232330	40764	Peptidyl-prolyl cis-trans isomerase D OS=Homo sapiens OX=9606 GN=PPID PE=1 SV=3
Q05682	19	9	9		233070	705920	676200	93231	Caldesmon OS=Homo sapiens OX=9606 GN=CALD1 PE=1 SV=3
A6NHR9	2	3	3		0	0	52472	226372	Structural maintenance of chromosomes flexible hinge domain-containing protein 1 OS=Homo sapiens OX=9606 GN=SMCHD1 PE=1 SV=2
Q9P206	6	2	2		8788.5	0	0	107095	Uncharacterized protein KIAA1522 OS=Homo sapiens OX=9606 GN=KIAA1522 PE=1 SV=2
Q9UI10	34	11	11		240390	365000	803410	57557	Translation initiation factor eIF-2B subunit delta OS=Homo sapiens OX=9606 GN=EIF2B4 PE=1 SV=2
P42696	27	7	7		41907	324410	149280	48565	RNA-binding protein 34 OS=Homo sapiens OX=9606 GN=RBM34 PE=1 SV=2
P51153	27	5	3		0	39787	10422	22774	Ras-related protein Rab-13 OS=Homo sapiens OX=9606 GN=RAB13 PE=1 SV=1
P14868	47	19	19	Carbamidomethylation	331030	1377200	1873600	57136	Aspartate--tRNA ligase cytoplasmic OS=Homo sapiens OX=9606 GN=DARS1 PE=1 SV=2
P53597	25	6	6	Oxidation (M)	639340	742050	995950	36250	Succinate--CoA ligase [ADP/GDP-forming] subunit alpha mitochondrial OS=Homo sapiens OX=9606 GN=SUCLG1 PE=1 SV=4
Q9BV38	20	6	6		25104	1147300	248760	47405	WD repeat-containing protein 18 OS=Homo sapiens OX=9606 GN=WDR18 PE=1 SV=2
Q9BRT6	33	4	4		241140	210540	35037	15225	Protein LLP homolog OS=Homo sapiens OX=9606 GN=LLPH PE=1 SV=1
Q5VT66	12	2	2		0	0	26834	37499	Mitochondrial amidoxime-reducing component 1 OS=Homo sapiens OX=9606 GN=MTARC1 PE=1 SV=1
Q16891	52	33	33	Carbamidomethylation	1899200	3412000	2471900	83678	MICOS complex subunit MIC60 OS=Homo sapiens OX=9606 GN=IMMT PE=1 SV=1
P54577	49	20	20	Carbamidomethylation	2438200	1531700	2634300	59144	Tyrosine--tRNA ligase cytoplasmic OS=Homo sapiens OX=9606 GN=YARS1 PE=1 SV=4
Q96LJ7	11	2	2		108960	37287	197760	33909	Dehydrogenase/reductase SDR family member 1 OS=Homo sapiens OX=9606 GN=DHRS1 PE=1 SV=1
P30086	76	11	11	Carbamidomethylation	5299900	4109100	3360100	21057	Phosphatidylethanolamine-binding protein 1 OS=Homo sapiens OX=9606 GN=PEBP1 PE=1 SV=3
Q14318	29	9	9		532230	710540	390690	44562	Peptidyl-prolyl cis-trans isomerase FKBP8 OS=Homo sapiens OX=9606 GN=FKBP8 PE=1 SV=2
Q9BZF1	8	4	4		2448	20613	207000	101196	Oxysterol-binding protein-related protein 8 OS=Homo sapiens OX=9606 GN=OSBPL8 PE=1 SV=3
P25786	54	14	14	Carbamidomethylation	1231800	1960100	1779200	29556	Proteasome subunit alpha type-1 OS=Homo sapiens OX=9606 GN=PSMA1 PE=1 SV=1
Q96PK6	47	26	26	Carbamidomethylation	1063100	5672600	3090800	69492	RNA-binding protein 14 OS=Homo sapiens OX=9606 GN=RBM14 PE=1 SV=2
Q14919	11	2	2		0	0	32035	22350	Dr1-associated corepressor OS=Homo sapiens OX=9606 GN=DRAP1 PE=1 SV=3
O75368	83	6	6		876640	563150	286960	12774	SH3 domain-binding glutamic acid-rich-like protein OS=Homo sapiens OX=9606 GN=SH3BGRL PE=1 SV=1
Q8IXB1	8	5	4		225740	3944.4	54767	91080	DnaJ homolog subfamily C member 10 OS=Homo sapiens OX=9606 GN=DNAJC10 PE=1 SV=2
Q99595	46	3	3	Carbamidomethylation	72161	10153	71827	18024	Mitochondrial import inner membrane translocase subunit Tim17-A OS=Homo sapiens OX=9606 GN=TIMM17A PE=1 SV=1
Q7Z478	4	3	3		82017	0	0	155235	ATP-dependent RNA helicase DHX29 OS=Homo sapiens OX=9606 GN=DHX29 PE=1 SV=2
P02533	62	36	9	Carbamidomethylation; Oxidation (M)	2673400	1812200	310280	51562	Keratin type I cytoskeletal 14 OS=Homo sapiens OX=9606 GN=KRT14 PE=1 SV=4
Q9UGI8	23	7	7	Carbamidomethylation	108830	295980	73197	47996	Testin OS=Homo sapiens OX=9606 GN=TES PE=1 SV=1
O94992	16	3	3		2124300	143720	1026500	40623	Protein HEXIM1 OS=Homo sapiens OX=9606 GN=HEXIM1 PE=1 SV=1
Q96C19	35	7	7	Carbamidomethylation	0	135780	101300	26697	EF-hand domain-containing protein D2 OS=Homo sapiens OX=9606 GN=EFHD2 PE=1 SV=1
Q69YN4	5	4	4		198800	0	45140	202023	Protein virilizer homolog OS=Homo sapiens OX=9606 GN=VIRMA PE=1 SV=2
Q96HR8	6	2	2	Oxidation (M); Acetylation (Protein N-term)	181680	9751.4	65450	53717	H/ACA ribonucleoprotein complex non-core subunit NAF1 OS=Homo sapiens OX=9606 GN=NAF1 PE=1 SV=2
P49189	31	12	11	Carbamidomethylation	462210	562560	2168800	53802	4-trimethylaminobutyraldehyde dehydrogenase OS=Homo sapiens OX=9606 GN=ALDH9A1 PE=1 SV=3
Q99714	89	17	17	Carbamidomethylation; Oxidation (M)	6663700	3101700	3775500	26923	3-hydroxyacyl-CoA dehydrogenase type-2 OS=Homo sapiens OX=9606 GN=HSD17B10 PE=1 SV=3
Q8IZ83	14	6	6		1783400	570700	981970	85127	Aldehyde dehydrogenase family 16 member A1 OS=Homo sapiens OX=9606 GN=ALDH16A1 PE=1 SV=2
P57737	9	3	3		0	0	105670	100605	Coronin-7 OS=Homo sapiens OX=9606 GN=CORO7 PE=1 SV=2
B0I1T2	22	12	12		587990	794360	1365000	116442	Unconventional myosin-Ig OS=Homo sapiens OX=9606 GN=MYO1G PE=1 SV=2
P18615	18	4	4		297150	168800	17149	43240	Negative elongation factor E OS=Homo sapiens OX=9606 GN=NELFE PE=1 SV=3
P01024	8	10	10	Carbamidomethylation	798450	814430	664380	187147	Complement C3 OS=Homo sapiens OX=9606 GN=C3 PE=1 SV=2
P51532	11	15	14		214570	3384400	494040	184644	Transcription activator BRG1 OS=Homo sapiens OX=9606 GN=SMARCA4 PE=1 SV=2
O75934	44	5	5	Carbamidomethylation; Acetylation (Protein N-term)	148450	63381	166370	26131	Pre-mRNA-splicing factor SPF27 OS=Homo sapiens OX=9606 GN=BCAS2 PE=1 SV=1
P15531	70	13	5	Carbamidomethylation; Oxidation (M)	1931900	1852900	3361500	17149	Nucleoside diphosphate kinase A OS=Homo sapiens OX=9606 GN=NME1 PE=1 SV=1
O15460	11	4	4		11175	303970	29720	60902	Prolyl 4-hydroxylase subunit alpha-2 OS=Homo sapiens OX=9606 GN=P4HA2 PE=1 SV=1
Q9UGN5	8	5	4		445.55	0	52937	66206	Poly [ADP-ribose] polymerase 2 OS=Homo sapiens OX=9606 GN=PARP2 PE=1 SV=2
P31153	54	20	20	Carbamidomethylation; Oxidation (M)	1342500	4747500	2147400	43661	S-adenosylmethionine synthase isoform type-2 OS=Homo sapiens OX=9606 GN=MAT2A PE=1 SV=1
Q99570	5	4	4		0	0	166540	153103	Phosphoinositide 3-kinase regulatory subunit 4 OS=Homo sapiens OX=9606 GN=PIK3R4 PE=1 SV=3
P12081	36	12	7	Carbamidomethylation	447460	346130	456430	57411	Histidine--tRNA ligase cytoplasmic OS=Homo sapiens OX=9606 GN=HARS1 PE=1 SV=2
Q9UPT8	7	5	5		59398	43295	21410	140256	Zinc finger CCCH domain-containing protein 4 OS=Homo sapiens OX=9606 GN=ZC3H4 PE=1 SV=3
O15294	7	6	6		3399400	990300	326820	116924	UDP-N-acetylglucosamine--peptide N-acetylglucosaminyltransferase 110 kDa subunit OS=Homo sapiens OX=9606 GN=OGT PE=1 SV=3
Q8WUA4	11	6	6		55093	151710	99132	100680	General transcription factor 3C polypeptide 2 OS=Homo sapiens OX=9606 GN=GTF3C2 PE=1 SV=2
Q13751	3	2	2		51620	0	0	129572	Laminin subunit beta-3 OS=Homo sapiens OX=9606 GN=LAMB3 PE=1 SV=1
Q9BUJ2	19	12	12	Carbamidomethylation	472020	513450	243930	95739	Heterogeneous nuclear ribonucleoprotein U-like protein 1 OS=Homo sapiens OX=9606 GN=HNRNPUL1 PE=1 SV=2
Q9HD33	16	4	4		14572	51426	137250	29450	39S ribosomal protein L47 mitochondrial OS=Homo sapiens OX=9606 GN=MRPL47 PE=1 SV=2
Q5QJE6	26	14	14		818680	2125700	857400	84469	Deoxynucleotidyltransferase terminal-interacting protein 2 OS=Homo sapiens OX=9606 GN=DNTTIP2 PE=1 SV=2
Q8TED0	30	9	9	Acetylation (Protein N-term)	143850	47749	57924	58415	U3 small nucleolar RNA-associated protein 15 homolog OS=Homo sapiens OX=9606 GN=UTP15 PE=1 SV=3
Q9BR76	17	6	6	Carbamidomethylation	89559	95588	75393	54235	Coronin-1B OS=Homo sapiens OX=9606 GN=CORO1B PE=1 SV=1
P07099	16	5	5		737890	181420	240330	52949	Epoxide hydrolase 1 OS=Homo sapiens OX=9606 GN=EPHX1 PE=1 SV=1
Q8WXI9	24	7	6		118950	8772.8	23092	65261	Transcriptional repressor p66-beta OS=Homo sapiens OX=9606 GN=GATAD2B PE=1 SV=1
Q13630	15	3	3		1259000	141020	301730	35893	GDP-L-fucose synthase OS=Homo sapiens OX=9606 GN=GFUS PE=1 SV=1
O15321	9	4	4		318940	203060	1121200	68861	Transmembrane 9 superfamily member 1 OS=Homo sapiens OX=9606 GN=TM9SF1 PE=2 SV=2
P51659	49	28	28	Carbamidomethylation	15854000	2724600	2612100	79686	Peroxisomal multifunctional enzyme type 2 OS=Homo sapiens OX=9606 GN=HSD17B4 PE=1 SV=3
Q14241	14	7	7		681670	281810	296510	89909	Elongin-A OS=Homo sapiens OX=9606 GN=ELOA PE=1 SV=2
P09132	38	3	3	Carbamidomethylation	182300	515310	74095	16156	Signal recognition particle 19 kDa protein OS=Homo sapiens OX=9606 GN=SRP19 PE=1 SV=3
Q5VW32	15	4	4	Carbamidomethylation	43586	0	261770	46476	BRO1 domain-containing protein BROX OS=Homo sapiens OX=9606 GN=BROX PE=1 SV=1
Q9NYY8	8	4	4		122050	3489.7	166980	81463	FAST kinase domain-containing protein 2 mitochondrial OS=Homo sapiens OX=9606 GN=FASTKD2 PE=1 SV=1
Q15043	15	6	6	Carbamidomethylation	156650	647710	1244300	54212	Metal cation symporter ZIP14 OS=Homo sapiens OX=9606 GN=SLC39A14 PE=1 SV=3
Q15942	28	10	10	Carbamidomethylation	1228700	932810	358320	61277	Zyxin OS=Homo sapiens OX=9606 GN=ZYX PE=1 SV=1
P11234	45	7	2		0	46232	170730	23409	Ras-related protein Ral-B OS=Homo sapiens OX=9606 GN=RALB PE=1 SV=1
P59998	46	7	7	Carbamidomethylation; Acetylation (Protein N-term)	914320	863810	1022500	19667	Actin-related protein 2/3 complex subunit 4 OS=Homo sapiens OX=9606 GN=ARPC4 PE=1 SV=3
Q9Y2T3	68	20	20	Carbamidomethylation; Oxidation (M); Acetylation (Protein N-term)	2431100	2560200	2568700	51003	Guanine deaminase OS=Homo sapiens OX=9606 GN=GDA PE=1 SV=1
Q9Y295	22	7	7		146880	90336	258490	40542	Developmentally-regulated GTP-binding protein 1 OS=Homo sapiens OX=9606 GN=DRG1 PE=1 SV=1
O43156	5	3	3		14646	0	0	122069	TELO2-interacting protein 1 homolog OS=Homo sapiens OX=9606 GN=TTI1 PE=1 SV=3
Q9NR33	25	2	2		324420	58442	400600	12209	DNA polymerase epsilon subunit 4 OS=Homo sapiens OX=9606 GN=POLE4 PE=1 SV=2
Q9NUL7	9	3	3		36159	0	587680	59581	Probable ATP-dependent RNA helicase DDX28 OS=Homo sapiens OX=9606 GN=DDX28 PE=1 SV=2
Q9BTC0	7	9	9		275390	807870	792660	243870	Death-inducer obliterator 1 OS=Homo sapiens OX=9606 GN=DIDO1 PE=1 SV=5
Q96FW1	32	7	7		617090	506340	279790	31284	Ubiquitin thioesterase OTUB1 OS=Homo sapiens OX=9606 GN=OTUB1 PE=1 SV=2
Q9Y5B9	43	42	41	Carbamidomethylation; Acetylation (Protein N-term)	7717200	4369900	4265400	119914	FACT complex subunit SPT16 OS=Homo sapiens OX=9606 GN=SUPT16H PE=1 SV=1
P42166	41	20	9	Carbamidomethylation	1224000	1411200	1130900	75492	Lamina-associated polypeptide 2 isoform alpha OS=Homo sapiens OX=9606 GN=TMPO PE=1 SV=2
O60884	39	11	11	Carbamidomethylation	622050	571460	823370	45746	DnaJ homolog subfamily A member 2 OS=Homo sapiens OX=9606 GN=DNAJA2 PE=1 SV=1
Q92947	24	6	6	Carbamidomethylation	121180	46639	61506	48127	Glutaryl-CoA dehydrogenase mitochondrial OS=Homo sapiens OX=9606 GN=GCDH PE=1 SV=1
Q15785	44	11	11	Carbamidomethylation	829180	208980	1355500	34559	Mitochondrial import receptor subunit TOM34 OS=Homo sapiens OX=9606 GN=TOMM34 PE=1 SV=2
Q8TEX9	28	19	19	Carbamidomethylation; Acetylation (Protein N-term)	1545300	638900	1072700	118715	Importin-4 OS=Homo sapiens OX=9606 GN=IPO4 PE=1 SV=2
Q92615	6	4	4		1235900	374220	1477200	80552	La-related protein 4B OS=Homo sapiens OX=9606 GN=LARP4B PE=1 SV=3
P53350	10	3	3		0	12557	53631	68255	Serine/threonine-protein kinase PLK1 OS=Homo sapiens OX=9606 GN=PLK1 PE=1 SV=1
Q9H1A4	4	4	4		47614	2880.8	26507	216498	Anaphase-promoting complex subunit 1 OS=Homo sapiens OX=9606 GN=ANAPC1 PE=1 SV=1
P61289	66	11	11	Carbamidomethylation; Oxidation (M)	1295000	1096800	1529800	29506	Proteasome activator complex subunit 3 OS=Homo sapiens OX=9606 GN=PSME3 PE=1 SV=1
P04406	89	50	49	Carbamidomethylation; Oxidation (M)	263950000	178620000	192510000	36053	Glyceraldehyde-3-phosphate dehydrogenase OS=Homo sapiens OX=9606 GN=GAPDH PE=1 SV=3
Q15363	39	6	6	Carbamidomethylation; Oxidation (M)	964680	504660	223230	22761	Transmembrane emp24 domain-containing protein 2 OS=Homo sapiens OX=9606 GN=TMED2 PE=1 SV=1
Q05048	33	8	8	Carbamidomethylation	201200	134480	236130	48358	Cleavage stimulation factor subunit 1 OS=Homo sapiens OX=9606 GN=CSTF1 PE=1 SV=1
Q9NQW6	8	5	5		79194	463730	88320	124199	Anillin OS=Homo sapiens OX=9606 GN=ANLN PE=1 SV=2
Q02809	56	30	29	Carbamidomethylation	1343800	802210	1093000	83550	Procollagen-lysine 2-oxoglutarate 5-dioxygenase 1 OS=Homo sapiens OX=9606 GN=PLOD1 PE=1 SV=2
Q9Y5A9	18	9	6	Acetylation (Protein N-term)	14238	195990	475160	62334	YTH domain-containing family protein 2 OS=Homo sapiens OX=9606 GN=YTHDF2 PE=1 SV=2
O14974	7	5	5		244770	70053	63323	115281	Protein phosphatase 1 regulatory subunit 12A OS=Homo sapiens OX=9606 GN=PPP1R12A PE=1 SV=1
P25788	30	6	6	Oxidation (M); Acetylation (Protein N-term)	226290	936580	715940	28433	Proteasome subunit alpha type-3 OS=Homo sapiens OX=9606 GN=PSMA3 PE=1 SV=2
Q14152	30	38	38		3230000	2240800	4141100	166569	Eukaryotic translation initiation factor 3 subunit A OS=Homo sapiens OX=9606 GN=EIF3A PE=1 SV=1
Q8N5A5	12	5	5		119350	210030	12838	57359	Zinc finger CCCH-type with G patch domain-containing protein OS=Homo sapiens OX=9606 GN=ZGPAT PE=1 SV=3
Q9Y6N5	38	10	10		870290	969130	535790	49961	Sulfide:quinone oxidoreductase mitochondrial OS=Homo sapiens OX=9606 GN=SQOR PE=1 SV=1
Q9NVN8	14	5	5		72083	454540	281000	65573	Guanine nucleotide-binding protein-like 3-like protein OS=Homo sapiens OX=9606 GN=GNL3L PE=1 SV=1
P11233	51	9	4		22317	146130	47848	23567	Ras-related protein Ral-A OS=Homo sapiens OX=9606 GN=RALA PE=1 SV=1
Q92643	17	5	5		72952	37797	131310	45252	GPI-anchor transamidase OS=Homo sapiens OX=9606 GN=PIGK PE=1 SV=2
O95487	3	2	2	Acetylation (Protein N-term)	10775	3299.7	94208	137417	Protein transport protein Sec24B OS=Homo sapiens OX=9606 GN=SEC24B PE=1 SV=2
Q9H4A4	25	12	12	Carbamidomethylation	1437400	657770	1156300	72596	Aminopeptidase B OS=Homo sapiens OX=9606 GN=RNPEP PE=1 SV=2
Q6IN85	3	2	2		0	0	1839	95368	Serine/threonine-protein phosphatase 4 regulatory subunit 3A OS=Homo sapiens OX=9606 GN=PPP4R3A PE=1 SV=1
P53041	30	9	9	Carbamidomethylation	194370	1241600	54220	56879	Serine/threonine-protein phosphatase 5 OS=Homo sapiens OX=9606 GN=PPP5C PE=1 SV=1
Q02127	25	7	7		652050	322100	1334400	42867	Dihydroorotate dehydrogenase (quinone) mitochondrial OS=Homo sapiens OX=9606 GN=DHODH PE=1 SV=3
Q6R327	2	2	2		18165	0	0	192216	Rapamycin-insensitive companion of mTOR OS=Homo sapiens OX=9606 GN=RICTOR PE=1 SV=1
Q9NY12	10	3	3		0	69423	61100	22348	H/ACA ribonucleoprotein complex subunit 1 OS=Homo sapiens OX=9606 GN=GAR1 PE=1 SV=1
O94826	49	19	19	Carbamidomethylation; Acetylation (Protein N-term)	626750	447580	1016300	67455	Mitochondrial import receptor subunit TOM70 OS=Homo sapiens OX=9606 GN=TOMM70 PE=1 SV=1
Q9UBV2	7	3	3		6814.2	5187.6	8181.8	88755	Protein sel-1 homolog 1 OS=Homo sapiens OX=9606 GN=SEL1L PE=1 SV=3
Q9BYT8	13	6	5		290990	59211	1711000	80652	Neurolysin mitochondrial OS=Homo sapiens OX=9606 GN=NLN PE=1 SV=1
Q96EY4	23	4	4		581900	36668	121490	23864	Translation machinery-associated protein 16 OS=Homo sapiens OX=9606 GN=TMA16 PE=1 SV=2
P16083	39	5	5	Carbamidomethylation	529460	279410	370930	25919	Ribosyldihydronicotinamide dehydrogenase [quinone] OS=Homo sapiens OX=9606 GN=NQO2 PE=1 SV=5
P33992	54	30	30	Carbamidomethylation; Oxidation (M); Acetylation (Protein N-term)	3586900	4002000	2709600	82286	DNA replication licensing factor MCM5 OS=Homo sapiens OX=9606 GN=MCM5 PE=1 SV=5
O15121	16	3	3		265330	82376	13973	37866	Sphingolipid delta(4)-desaturase DES1 OS=Homo sapiens OX=9606 GN=DEGS1 PE=1 SV=1
P62195	61	19	17	Carbamidomethylation; Acetylation (Protein N-term)	1448400	636350	604670	45626	26S proteasome regulatory subunit 8 OS=Homo sapiens OX=9606 GN=PSMC5 PE=1 SV=1
P11532	2	3	3		9693.3	0	78371	426751	Dystrophin OS=Homo sapiens OX=9606 GN=DMD PE=1 SV=3
P18084	7	3	3	Carbamidomethylation	1440500	27655	269870	88054	Integrin beta-5 OS=Homo sapiens OX=9606 GN=ITGB5 PE=1 SV=1
P41236	13	2	2	Acetylation (Protein N-term)	4814	68438	24264	23015	Protein phosphatase inhibitor 2 OS=Homo sapiens OX=9606 GN=PPP1R2 PE=1 SV=2
Q6NXS1	13	2	2	Acetylation (Protein N-term)	4814	68438	24264	23106	Protein phosphatase inhibitor 2 family member B OS=Homo sapiens OX=9606 GN=PPP1R2B PE=1 SV=2
Q68EM7	7	4	4		158620	68088	805350	95437	Rho GTPase-activating protein 17 OS=Homo sapiens OX=9606 GN=ARHGAP17 PE=1 SV=1
P98179	36	5	5	Oxidation (M)	2629900	1350100	1416400	17170	RNA-binding protein 3 OS=Homo sapiens OX=9606 GN=RBM3 PE=1 SV=1
O15031	21	22	22		1297000	1157100	803130	205126	Plexin-B2 OS=Homo sapiens OX=9606 GN=PLXNB2 PE=1 SV=3
Q86TB9	5	3	3		11741	0	106580	86850	Protein PAT1 homolog 1 OS=Homo sapiens OX=9606 GN=PATL1 PE=1 SV=2
Q92538	2	4	3		26498	0	8402.8	206444	Golgi-specific brefeldin A-resistance guanine nucleotide exchange factor 1 OS=Homo sapiens OX=9606 GN=GBF1 PE=1 SV=2
Q8WY22	17	3	3		177140	86491	31832	27836	BRI3-binding protein OS=Homo sapiens OX=9606 GN=BRI3BP PE=1 SV=1
Q2T9J0	9	3	3	Carbamidomethylation	31539	0	135070	59309	Peroxisomal leader peptide-processing protease OS=Homo sapiens OX=9606 GN=TYSND1 PE=1 SV=3
Q13740	20	6	6	Carbamidomethylation; Oxidation (M)	777250	62164	632520	65102	CD166 antigen OS=Homo sapiens OX=9606 GN=ALCAM PE=1 SV=2
Q969N2	16	6	6		8147	188810	342440	65700	GPI transamidase component PIG-T OS=Homo sapiens OX=9606 GN=PIGT PE=1 SV=1
P21953	8	2	2		19204	2213	12794	43123	2-oxoisovalerate dehydrogenase subunit beta mitochondrial OS=Homo sapiens OX=9606 GN=BCKDHB PE=1 SV=2
Q9NX24	19	2	2		406630	167120	253820	17201	H/ACA ribonucleoprotein complex subunit 2 OS=Homo sapiens OX=9606 GN=NHP2 PE=1 SV=1
P24534	52	13	11	Carbamidomethylation; Oxidation (M)	5610900	5261400	2326400	24764	Elongation factor 1-beta OS=Homo sapiens OX=9606 GN=EEF1B2 PE=1 SV=3
Q9ULW3	13	3	3		161180	534210	35326	31079	Activator of basal transcription 1 OS=Homo sapiens OX=9606 GN=ABT1 PE=1 SV=1
P19525	26	10	10		297140	372680	434050	62094	Interferon-induced double-stranded RNA-activated protein kinase OS=Homo sapiens OX=9606 GN=EIF2AK2 PE=1 SV=2
Q9UBK8	10	5	5		1437100	77950	173170	77674	Methionine synthase reductase OS=Homo sapiens OX=9606 GN=MTRR PE=1 SV=4
Q9UNX4	28	15	15	Carbamidomethylation	1448700	1220400	666020	106099	WD repeat-containing protein 3 OS=Homo sapiens OX=9606 GN=WDR3 PE=1 SV=1
Q6XQN6	21	6	6	Carbamidomethylation; Oxidation (M)	366070	126150	207760	57578	Nicotinate phosphoribosyltransferase OS=Homo sapiens OX=9606 GN=NAPRT PE=1 SV=2
O15381	9	5	5		1407200	254300	370240	95051	Nuclear valosin-containing protein-like OS=Homo sapiens OX=9606 GN=NVL PE=1 SV=1
Q14739	20	10	10		1207700	1125700	2153500	70703	Delta(14)-sterol reductase LBR OS=Homo sapiens OX=9606 GN=LBR PE=1 SV=2
P29083	12	3	3	Acetylation (Protein N-term)	671380	76922	759830	49452	General transcription factor IIE subunit 1 OS=Homo sapiens OX=9606 GN=GTF2E1 PE=1 SV=2
Q6FI81	34	7	7	Carbamidomethylation	491940	403760	659690	33582	Anamorsin OS=Homo sapiens OX=9606 GN=CIAPIN1 PE=1 SV=2
P28340	17	14	14	Carbamidomethylation	130150	394530	756840	123631	DNA polymerase delta catalytic subunit OS=Homo sapiens OX=9606 GN=POLD1 PE=1 SV=2
P62310	40	3	3	Acetylation (Protein N-term)	19336	280940	87625	11845	U6 snRNA-associated Sm-like protein LSm3 OS=Homo sapiens OX=9606 GN=LSM3 PE=1 SV=2
Q6IBS0	34	8	7	Carbamidomethylation; Acetylation (Protein N-term)	1415000	239430	406550	39548	Twinfilin-2 OS=Homo sapiens OX=9606 GN=TWF2 PE=1 SV=2
O43324	39	5	5	Carbamidomethylation; Acetylation (Protein N-term)	476770	240890	1008000	19811	Eukaryotic translation elongation factor 1 epsilon-1 OS=Homo sapiens OX=9606 GN=EEF1E1 PE=1 SV=1
P07686	21	10	9	Carbamidomethylation	821510	439490	1898400	63111	Beta-hexosaminidase subunit beta OS=Homo sapiens OX=9606 GN=HEXB PE=1 SV=3
Q9HBH5	21	6	6		6297.7	266250	280330	36865	Retinol dehydrogenase 14 OS=Homo sapiens OX=9606 GN=RDH14 PE=1 SV=1
P54289	6	4	4		984890	131720	288520	124568	Voltage-dependent calcium channel subunit alpha-2/delta-1 OS=Homo sapiens OX=9606 GN=CACNA2D1 PE=1 SV=3
Q06124	7	3	3		196610	139170	248790	68011	Tyrosine-protein phosphatase non-receptor type 11 OS=Homo sapiens OX=9606 GN=PTPN11 PE=1 SV=3
Q9H936	13	3	3		0	133320	350780	34470	Mitochondrial glutamate carrier 1 OS=Homo sapiens OX=9606 GN=SLC25A22 PE=1 SV=1
Q9BUT1	9	1	1		206860	21659	0	26724	3-hydroxybutyrate dehydrogenase type 2 OS=Homo sapiens OX=9606 GN=BDH2 PE=1 SV=2
Q9NRN7	24	6	6	Carbamidomethylation	141300	42385	232880	35776	L-aminoadipate-semialdehyde dehydrogenase-phosphopantetheinyl transferase OS=Homo sapiens OX=9606 GN=AASDHPPT PE=1 SV=2
P61224	77	11	3	Carbamidomethylation	227880	168610	134330	20825	Ras-related protein Rap-1b OS=Homo sapiens OX=9606 GN=RAP1B PE=1 SV=1
Q9NZL9	22	4	4		154620	348490	125250	37552	Methionine adenosyltransferase 2 subunit beta OS=Homo sapiens OX=9606 GN=MAT2B PE=1 SV=1
Q9NR31	63	9	5	Carbamidomethylation; Oxidation (M)	790850	437890	446120	22367	GTP-binding protein SAR1a OS=Homo sapiens OX=9606 GN=SAR1A PE=1 SV=1
Q96CN7	20	4	4		179930	81284	391000	32237	Isochorismatase domain-containing protein 1 OS=Homo sapiens OX=9606 GN=ISOC1 PE=1 SV=3
P49005	9	3	3		32540	32007	302880	51290	DNA polymerase delta subunit 2 OS=Homo sapiens OX=9606 GN=POLD2 PE=1 SV=1
O60437	9	9	9	Carbamidomethylation	788980	147290	216100	204745	Periplakin OS=Homo sapiens OX=9606 GN=PPL PE=1 SV=4
Q9Y3B2	25	4	4	Carbamidomethylation	240720	116800	238010	21452	Exosome complex component CSL4 OS=Homo sapiens OX=9606 GN=EXOSC1 PE=1 SV=1
P49419	48	18	18	Carbamidomethylation; Oxidation (M)	1987700	1253200	1840700	58487	Alpha-aminoadipic semialdehyde dehydrogenase OS=Homo sapiens OX=9606 GN=ALDH7A1 PE=1 SV=5
Q9H910	25	3	3	Carbamidomethylation	51540	211870	141100	20063	Jupiter microtubule associated homolog 2 OS=Homo sapiens OX=9606 GN=JPT2 PE=1 SV=1
P20930	1	3	3		4916.3	13871	206560	435180	Filaggrin OS=Homo sapiens OX=9606 GN=FLG PE=1 SV=3
P15374	13	2	2		227780	123810	397150	26183	Ubiquitin carboxyl-terminal hydrolase isozyme L3 OS=Homo sapiens OX=9606 GN=UCHL3 PE=1 SV=1
Q6P6C2	10	3	3	Acetylation (Protein N-term)	53199	211190	137970	44256	RNA demethylase ALKBH5 OS=Homo sapiens OX=9606 GN=ALKBH5 PE=1 SV=2
Q14914	34	7	7	Carbamidomethylation	220150	616960	212510	35870	Prostaglandin reductase 1 OS=Homo sapiens OX=9606 GN=PTGR1 PE=1 SV=2
Q8WX93	13	11	11	Carbamidomethylation	502520	331190	270060	150564	Palladin OS=Homo sapiens OX=9606 GN=PALLD PE=1 SV=3
A8CG34	7	3	3		12365	509.24	38538	125092	Nuclear envelope pore membrane protein POM 121C OS=Homo sapiens OX=9606 GN=POM121C PE=1 SV=3
Q96HA1	7	3	3		12365	509.24	38538	127720	Nuclear envelope pore membrane protein POM 121 OS=Homo sapiens OX=9606 GN=POM121 PE=1 SV=2
Q6KC79	2	4	4		0	0	7153.2	316051	Nipped-B-like protein OS=Homo sapiens OX=9606 GN=NIPBL PE=1 SV=2
Q9Y5Y2	34	5	5	Carbamidomethylation; Acetylation (Protein N-term)	1656800	107020	58006	28825	Cytosolic Fe-S cluster assembly factor NUBP2 OS=Homo sapiens OX=9606 GN=NUBP2 PE=1 SV=1
Q13126	40	7	7	Carbamidomethylation; Oxidation (M)	1588800	738600	670300	31236	S-methyl-5'-thioadenosine phosphorylase OS=Homo sapiens OX=9606 GN=MTAP PE=1 SV=2
Q9P0S9	50	3	3		0	21279	64201	11565	Transmembrane protein 14C OS=Homo sapiens OX=9606 GN=TMEM14C PE=1 SV=1
Q96GM5	12	3	2		0	0	41004	58233	SWI/SNF-related matrix-associated actin-dependent regulator of chromatin subfamily D member 1 OS=Homo sapiens OX=9606 GN=SMARCD1 PE=1 SV=2
O95905	5	2	2	Carbamidomethylation	46720	0	57459	72758	Protein ecdysoneless homolog OS=Homo sapiens OX=9606 GN=ECD PE=1 SV=1
P20073	25	12	12	Carbamidomethylation	942340	1067400	829330	52739	Annexin A7 OS=Homo sapiens OX=9606 GN=ANXA7 PE=1 SV=3
P04181	32	8	8	Carbamidomethylation	287380	75408	413150	48535	Ornithine aminotransferase mitochondrial OS=Homo sapiens OX=9606 GN=OAT PE=1 SV=1
Q9H6R4	22	17	17		1934000	492800	2498900	127593	Nucleolar protein 6 OS=Homo sapiens OX=9606 GN=NOL6 PE=1 SV=2
Q99536	59	16	16	Carbamidomethylation; Oxidation (M)	264100000	842040	13274000	41920	Synaptic vesicle membrane protein VAT-1 homolog OS=Homo sapiens OX=9606 GN=VAT1 PE=1 SV=2
P41567	81	7	7	Carbamidomethylation; Acetylation (Protein N-term)	473130	192900	410870	12732	Eukaryotic translation initiation factor 1 OS=Homo sapiens OX=9606 GN=EIF1 PE=1 SV=1
Q9BRR6	19	5	5		61568	299830	113760	54089	ADP-dependent glucokinase OS=Homo sapiens OX=9606 GN=ADPGK PE=1 SV=1
O14818	61	16	11	Carbamidomethylation; Oxidation (M)	969870	2088800	1528400	27887	Proteasome subunit alpha type-7 OS=Homo sapiens OX=9606 GN=PSMA7 PE=1 SV=1
O95757	28	18	13	Carbamidomethylation	1225400	378510	237460	94512	Heat shock 70 kDa protein 4L OS=Homo sapiens OX=9606 GN=HSPA4L PE=1 SV=3
Q08380	25	9	9	Carbamidomethylation	2239300	1004200	1142100	65331	Galectin-3-binding protein OS=Homo sapiens OX=9606 GN=LGALS3BP PE=1 SV=1
P13807	11	6	6		13970	114300	298470	83786	Glycogen [starch] synthase muscle OS=Homo sapiens OX=9606 GN=GYS1 PE=1 SV=2
Q9Y5S2	3	3	3		0	446.15	0	194314	Serine/threonine-protein kinase MRCK beta OS=Homo sapiens OX=9606 GN=CDC42BPB PE=1 SV=2
O95573	38	20	18	Carbamidomethylation; Oxidation (M); Acetylation (Protein N-term)	8022600	892150	2335800	80420	Long-chain-fatty-acid--CoA ligase 3 OS=Homo sapiens OX=9606 GN=ACSL3 PE=1 SV=3
O43776	30	14	14	Oxidation (M)	1419000	538440	933840	62943	Asparagine--tRNA ligase cytoplasmic OS=Homo sapiens OX=9606 GN=NARS1 PE=1 SV=1
Q8IX12	8	7	7		1637900	1810300	314210	132821	Cell division cycle and apoptosis regulator protein 1 OS=Homo sapiens OX=9606 GN=CCAR1 PE=1 SV=2
Q01082	35	55	52	Carbamidomethylation	2847500	2727700	2120400	274608	Spectrin beta chain non-erythrocytic 1 OS=Homo sapiens OX=9606 GN=SPTBN1 PE=1 SV=2
Q9Y2D5	10	4	4	Carbamidomethylation	392140	82695	75189	94661	A-kinase anchor protein 2 OS=Homo sapiens OX=9606 GN=AKAP2 PE=1 SV=3
Q96SB4	21	11	9		431270	2649900	1952500	74325	SRSF protein kinase 1 OS=Homo sapiens OX=9606 GN=SRPK1 PE=1 SV=2
Q99720	29	3	3		16201	95422	294230	25128	Sigma non-opioid intracellular receptor 1 OS=Homo sapiens OX=9606 GN=SIGMAR1 PE=1 SV=1
Q7Z7H5	45	9	7	Carbamidomethylation	1222900	198430	233750	25943	Transmembrane emp24 domain-containing protein 4 OS=Homo sapiens OX=9606 GN=TMED4 PE=1 SV=1
Q96EN8	3	2	2		44993	623370	1302500	98120	Molybdenum cofactor sulfurase OS=Homo sapiens OX=9606 GN=MOCOS PE=1 SV=2
P02794	54	7	7	Carbamidomethylation; Acetylation (Protein N-term)	537210	562350	139010	21226	Ferritin heavy chain OS=Homo sapiens OX=9606 GN=FTH1 PE=1 SV=2
Q13616	6	3	3		0	2284.9	116060	89678	Cullin-1 OS=Homo sapiens OX=9606 GN=CUL1 PE=1 SV=2
Q6PI48	20	7	7		386290	161270	77377	73563	Aspartate--tRNA ligase mitochondrial OS=Homo sapiens OX=9606 GN=DARS2 PE=1 SV=1
P32455	11	4	3		143600	117570	66297	67931	Guanylate-binding protein 1 OS=Homo sapiens OX=9606 GN=GBP1 PE=1 SV=2
Q15424	23	20	11	Carbamidomethylation; Acetylation (Protein N-term)	112640	393300	404620	102642	Scaffold attachment factor B1 OS=Homo sapiens OX=9606 GN=SAFB PE=1 SV=4
P27797	76	26	26	Carbamidomethylation; Oxidation (M)	12793000	13741000	10729000	48142	Calreticulin OS=Homo sapiens OX=9606 GN=CALR PE=1 SV=1
P82970	17	3	3		113160	243680	26146	31525	High mobility group nucleosome-binding domain-containing protein 5 OS=Homo sapiens OX=9606 GN=HMGN5 PE=1 SV=1
Q9NW64	15	4	4	Carbamidomethylation	3626.3	205210	180830	46896	Pre-mRNA-splicing factor RBM22 OS=Homo sapiens OX=9606 GN=RBM22 PE=1 SV=1
Q15020	26	18	17	Acetylation (Protein N-term)	1072900	763120	331830	109935	Squamous cell carcinoma antigen recognized by T-cells 3 OS=Homo sapiens OX=9606 GN=SART3 PE=1 SV=1
Q9H6W3	13	4	4	Carbamidomethylation	13157	8446.2	85405	71086	Ribosomal oxygenase 1 OS=Homo sapiens OX=9606 GN=RIOX1 PE=1 SV=2
Q6UVK1	5	6	6		166850	23666	280230	250534	Chondroitin sulfate proteoglycan 4 OS=Homo sapiens OX=9606 GN=CSPG4 PE=1 SV=2
E9PAV3	4	8	8		2111000	4300000	3770700	205419	Nascent polypeptide-associated complex subunit alpha muscle-specific form OS=Homo sapiens OX=9606 GN=NACA PE=1 SV=1
P51809	32	5	5		304960	827680	347740	24935	Vesicle-associated membrane protein 7 OS=Homo sapiens OX=9606 GN=VAMP7 PE=1 SV=3
Q9HDC9	36	11	11	Oxidation (M)	1880600	2053400	754590	46480	Adipocyte plasma membrane-associated protein OS=Homo sapiens OX=9606 GN=APMAP PE=1 SV=2
P00492	59	10	10	Carbamidomethylation	3149800	1198100	1160000	24579	Hypoxanthine-guanine phosphoribosyltransferase OS=Homo sapiens OX=9606 GN=HPRT1 PE=1 SV=2
P46100	6	12	12	Carbamidomethylation	347920	320860	510570	282584	Transcriptional regulator ATRX OS=Homo sapiens OX=9606 GN=ATRX PE=1 SV=5
P83916	46	9	8	Carbamidomethylation; Oxidation (M)	160840	311580	4550000	21418	Chromobox protein homolog 1 OS=Homo sapiens OX=9606 GN=CBX1 PE=1 SV=1
P23258	40	11	11		11232000	239710	949990	51170	Tubulin gamma-1 chain OS=Homo sapiens OX=9606 GN=TUBG1 PE=1 SV=2
P38606	53	24	24	Carbamidomethylation	5717100	2417200	1647900	68304	V-type proton ATPase catalytic subunit A OS=Homo sapiens OX=9606 GN=ATP6V1A PE=1 SV=2
P13861	51	14	14	Acetylation (Protein N-term)	413810	2619200	308240	45518	cAMP-dependent protein kinase type II-alpha regulatory subunit OS=Homo sapiens OX=9606 GN=PRKAR2A PE=1 SV=2
Q15181	71	15	14	Carbamidomethylation; Oxidation (M)	2037900	1924400	3481700	32660	Inorganic pyrophosphatase OS=Homo sapiens OX=9606 GN=PPA1 PE=1 SV=2
O60341	13	7	7		260180	137740	523660	92903	Lysine-specific histone demethylase 1A OS=Homo sapiens OX=9606 GN=KDM1A PE=1 SV=2
Q12907	50	12	12	Carbamidomethylation	1801300	2944900	2961500	40229	Vesicular integral-membrane protein VIP36 OS=Homo sapiens OX=9606 GN=LMAN2 PE=1 SV=1
O43242	30	11	11	Oxidation (M)	570280	1505500	1110800	60978	26S proteasome non-ATPase regulatory subunit 3 OS=Homo sapiens OX=9606 GN=PSMD3 PE=1 SV=2
Q9Y276	9	2	2		31879	8116.2	52420	47534	Mitochondrial chaperone BCS1 OS=Homo sapiens OX=9606 GN=BCS1L PE=1 SV=1
Q9HC38	43	9	9	Carbamidomethylation; Oxidation (M)	685800	578400	1274400	34793	Glyoxalase domain-containing protein 4 OS=Homo sapiens OX=9606 GN=GLOD4 PE=1 SV=1
P18085	56	10	5	Carbamidomethylation; Oxidation (M)	145470	684430	424020	20511	ADP-ribosylation factor 4 OS=Homo sapiens OX=9606 GN=ARF4 PE=1 SV=3
O95139	40	4	4	Acetylation (Protein N-term)	10370	292440	131880	15489	NADH dehydrogenase [ubiquinone] 1 beta subcomplex subunit 6 OS=Homo sapiens OX=9606 GN=NDUFB6 PE=1 SV=3
Q96P11	18	5	5	Acetylation (Protein N-term)	42508	89507	244780	46692	28S rRNA (cytosine-C(5))-methyltransferase OS=Homo sapiens OX=9606 GN=NSUN5 PE=1 SV=2
Q96QR8	45	6	6		181380	616910	540970	33241	Transcriptional activator protein Pur-beta OS=Homo sapiens OX=9606 GN=PURB PE=1 SV=3
P07900	62	68	40	Carbamidomethylation; Oxidation (M)	15517000	18134000	21692000	84660	Heat shock protein HSP 90-alpha OS=Homo sapiens OX=9606 GN=HSP90AA1 PE=1 SV=5
Q9H7Z3	3	2	2	Acetylation (Protein N-term)	201800	20909	0	132673	Nuclear exosome regulator NRDE2 OS=Homo sapiens OX=9606 GN=NRDE2 PE=1 SV=3
Q92544	8	3	3		1152700	342630	568610	74519	Transmembrane 9 superfamily member 4 OS=Homo sapiens OX=9606 GN=TM9SF4 PE=1 SV=2
Q9BTV4	52	12	12		1320100	291370	453540	44876	Transmembrane protein 43 OS=Homo sapiens OX=9606 GN=TMEM43 PE=1 SV=1
Q9H3G5	9	3	3		74213	15340	143990	54164	Probable serine carboxypeptidase CPVL OS=Homo sapiens OX=9606 GN=CPVL PE=1 SV=2
Q04323	32	7	7		1496600	295520	235870	33325	UBX domain-containing protein 1 OS=Homo sapiens OX=9606 GN=UBXN1 PE=1 SV=2
Q9UBU9	19	9	9		144070	866320	854310	70182	Nuclear RNA export factor 1 OS=Homo sapiens OX=9606 GN=NXF1 PE=1 SV=1
P08648	16	10	10	Carbamidomethylation; Oxidation (M)	1283300	1909200	865830	114536	Integrin alpha-5 OS=Homo sapiens OX=9606 GN=ITGA5 PE=1 SV=2
Q9UDY4	23	4	3	Carbamidomethylation	128830	25289	433580	37807	DnaJ homolog subfamily B member 4 OS=Homo sapiens OX=9606 GN=DNAJB4 PE=1 SV=1
Q9NV06	23	7	7		31818	195420	207500	51402	DDB1- and CUL4-associated factor 13 OS=Homo sapiens OX=9606 GN=DCAF13 PE=1 SV=2
Q9Y316	21	4	4		60763	11590	453690	33733	Protein MEMO1 OS=Homo sapiens OX=9606 GN=MEMO1 PE=1 SV=1
P68036	59	5	5	Carbamidomethylation	2138400	553220	649770	17862	Ubiquitin-conjugating enzyme E2 L3 OS=Homo sapiens OX=9606 GN=UBE2L3 PE=1 SV=1
P49773	79	8	8	Carbamidomethylation; Oxidation (M)	4513000	3070100	1749800	13802	Histidine triad nucleotide-binding protein 1 OS=Homo sapiens OX=9606 GN=HINT1 PE=1 SV=2
Q96GC5	17	3	3		222070	601440	290240	23935	39S ribosomal protein L48 mitochondrial OS=Homo sapiens OX=9606 GN=MRPL48 PE=1 SV=2
P61106	87	20	18	Carbamidomethylation	3901300	2792900	1638300	23897	Ras-related protein Rab-14 OS=Homo sapiens OX=9606 GN=RAB14 PE=1 SV=4
Q9UQ88	9	7	7		34028	833750	337580	91362	Cyclin-dependent kinase 11A OS=Homo sapiens OX=9606 GN=CDK11A PE=1 SV=4
P21127	9	7	7		34028	833750	337580	92620	Cyclin-dependent kinase 11B OS=Homo sapiens OX=9606 GN=CDK11B PE=1 SV=4
Q9H1E3	24	7	7		21504	109240	36131	27296	Nuclear ubiquitous casein and cyclin-dependent kinase substrate 1 OS=Homo sapiens OX=9606 GN=NUCKS1 PE=1 SV=1
P31948	57	35	34	Carbamidomethylation; Oxidation (M)	4358300	5783300	3431800	62639	Stress-induced-phosphoprotein 1 OS=Homo sapiens OX=9606 GN=STIP1 PE=1 SV=1
Q9NUQ3	7	2	2		0	4526.1	0	60586	Gamma-taxilin OS=Homo sapiens OX=9606 GN=TXLNG PE=1 SV=2
Q8N3C0	9	13	13		1000800	373340	888960	251458	Activating signal cointegrator 1 complex subunit 3 OS=Homo sapiens OX=9606 GN=ASCC3 PE=1 SV=3
P19784	43	12	12		2215900	1155600	964300	41213	Casein kinase II subunit alpha' OS=Homo sapiens OX=9606 GN=CSNK2A2 PE=1 SV=1
P53985	11	5	5		9471.3	306020	17865	53944	Monocarboxylate transporter 1 OS=Homo sapiens OX=9606 GN=SLC16A1 PE=1 SV=3
Q8N983	28	4	4		2955300	727890	762320	23431	39S ribosomal protein L43 mitochondrial OS=Homo sapiens OX=9606 GN=MRPL43 PE=1 SV=1
Q9UIA9	7	4	4		107770	33670	237720	123907	Exportin-7 OS=Homo sapiens OX=9606 GN=XPO7 PE=1 SV=3
O43598	28	3	3	Carbamidomethylation	382980	410450	138470	19108	2'-deoxynucleoside 5'-phosphate N-hydrolase 1 OS=Homo sapiens OX=9606 GN=DNPH1 PE=1 SV=1
P22392	80	16	8	Carbamidomethylation; Oxidation (M)	6247100	5898000	3744600	17298	Nucleoside diphosphate kinase B OS=Homo sapiens OX=9606 GN=NME2 PE=1 SV=1
Q9BY32	24	3	3	Carbamidomethylation	512670	207100	315110	21446	Inosine triphosphate pyrophosphatase OS=Homo sapiens OX=9606 GN=ITPA PE=1 SV=2
P55265	36	37	37	Carbamidomethylation	1613800	3945700	3538600	136066	Double-stranded RNA-specific adenosine deaminase OS=Homo sapiens OX=9606 GN=ADAR PE=1 SV=4
Q13200	50	33	33	Carbamidomethylation; Oxidation (M)	1070800	1468200	4651900	100200	26S proteasome non-ATPase regulatory subunit 2 OS=Homo sapiens OX=9606 GN=PSMD2 PE=1 SV=3
Q96QK1	25	15	15	Carbamidomethylation	964220	370970	1310100	91707	Vacuolar protein sorting-associated protein 35 OS=Homo sapiens OX=9606 GN=VPS35 PE=1 SV=2
Q99829	17	6	6	Carbamidomethylation; Acetylation (Protein N-term)	331050	269050	766680	59059	Copine-1 OS=Homo sapiens OX=9606 GN=CPNE1 PE=1 SV=1
Q99798	46	22	22	Carbamidomethylation; Oxidation (M)	2435300	1035000	2207500	85425	Aconitate hydratase mitochondrial OS=Homo sapiens OX=9606 GN=ACO2 PE=1 SV=2
O43707	69	64	40	Carbamidomethylation; Oxidation (M)	15447000	21432000	7161200	104854	Alpha-actinin-4 OS=Homo sapiens OX=9606 GN=ACTN4 PE=1 SV=2
Q7Z2T5	8	4	4	Acetylation (Protein N-term)	841140	111690	46298	81747	TRMT1-like protein OS=Homo sapiens OX=9606 GN=TRMT1L PE=1 SV=2
Q9H078	20	9	9		101430	210650	425260	78729	Caseinolytic peptidase B protein homolog OS=Homo sapiens OX=9606 GN=CLPB PE=1 SV=1
Q92917	23	5	5		124280	32837	32655	52229	G-patch domain and KOW motifs-containing protein OS=Homo sapiens OX=9606 GN=GPKOW PE=1 SV=2
Q8NE71	49	31	31		763510	1345100	2654300	95926	ATP-binding cassette sub-family F member 1 OS=Homo sapiens OX=9606 GN=ABCF1 PE=1 SV=2
Q13526	33	3	3	Carbamidomethylation; Oxidation (M)	814910	137680	150960	18243	Peptidyl-prolyl cis-trans isomerase NIMA-interacting 1 OS=Homo sapiens OX=9606 GN=PIN1 PE=1 SV=1
Q8N7H5	30	9	9		83158	158670	270630	59976	RNA polymerase II-associated factor 1 homolog OS=Homo sapiens OX=9606 GN=PAF1 PE=1 SV=2
Q96I99	31	11	11	Carbamidomethylation	170180	535880	512240	46511	Succinate--CoA ligase [GDP-forming] subunit beta mitochondrial OS=Homo sapiens OX=9606 GN=SUCLG2 PE=1 SV=2
O60701	50	19	19	Carbamidomethylation; Oxidation (M)	19942000	489550	2841400	55024	UDP-glucose 6-dehydrogenase OS=Homo sapiens OX=9606 GN=UGDH PE=1 SV=1
Q9P2B2	13	9	9		1143700	760500	298560	98556	Prostaglandin F2 receptor negative regulator OS=Homo sapiens OX=9606 GN=PTGFRN PE=1 SV=2
Q6UWP7	12	4	4		21832	211320	2428700	48920	Lysocardiolipin acyltransferase 1 OS=Homo sapiens OX=9606 GN=LCLAT1 PE=1 SV=1
Q9BYD6	30	7	7		308800	203650	680050	36909	39S ribosomal protein L1 mitochondrial OS=Homo sapiens OX=9606 GN=MRPL1 PE=1 SV=2
O75746	21	9	5	Carbamidomethylation	392290	321830	439280	74762	Calcium-binding mitochondrial carrier protein Aralar1 OS=Homo sapiens OX=9606 GN=SLC25A12 PE=1 SV=2
O43172	39	14	14	Carbamidomethylation	1192100	1244000	1675600	58449	U4/U6 small nuclear ribonucleoprotein Prp4 OS=Homo sapiens OX=9606 GN=PRPF4 PE=1 SV=2
Q9BZE1	31	10	10	Carbamidomethylation	261030	376690	456400	48118	39S ribosomal protein L37 mitochondrial OS=Homo sapiens OX=9606 GN=MRPL37 PE=1 SV=2
Q9Y2Z0	26	6	6	Acetylation (Protein N-term)	519300	197220	514800	41024	Protein SGT1 homolog OS=Homo sapiens OX=9606 GN=SUGT1 PE=1 SV=3
P62308	36	4	4	Oxidation (M)	2652800	746490	741440	8496	Small nuclear ribonucleoprotein G OS=Homo sapiens OX=9606 GN=SNRPG PE=1 SV=1
A8MWD9	36	4	4	Oxidation (M)	2652800	746490	741440	8544	Putative small nuclear ribonucleoprotein G-like protein 15 OS=Homo sapiens OX=9606 GN=SNRPGP15 PE=5 SV=2
O95302	14	7	7		233000	712500	166070	63084	Peptidyl-prolyl cis-trans isomerase FKBP9 OS=Homo sapiens OX=9606 GN=FKBP9 PE=1 SV=2
P53007	22	7	7		83689	410950	693150	34013	Tricarboxylate transport protein mitochondrial OS=Homo sapiens OX=9606 GN=SLC25A1 PE=1 SV=2
Q8WYP5	15	21	21		605550	1961400	1107000	252496	Protein ELYS OS=Homo sapiens OX=9606 GN=AHCTF1 PE=1 SV=3
P53582	40	9	9	Carbamidomethylation	280520	234940	1102700	43215	Methionine aminopeptidase 1 OS=Homo sapiens OX=9606 GN=METAP1 PE=1 SV=2
Q9NVP1	46	22	22		2160100	2071300	2296000	75407	ATP-dependent RNA helicase DDX18 OS=Homo sapiens OX=9606 GN=DDX18 PE=1 SV=2
Q8TED1	16	3	3		65600	70026	228320	23881	Probable glutathione peroxidase 8 OS=Homo sapiens OX=9606 GN=GPX8 PE=1 SV=2
Q04637	26	32	28	Carbamidomethylation	4516600	2177000	7370300	175490	Eukaryotic translation initiation factor 4 gamma 1 OS=Homo sapiens OX=9606 GN=EIF4G1 PE=1 SV=4
P00367	50	24	24	Carbamidomethylation; Oxidation (M)	2398600	5107900	2828100	61398	Glutamate dehydrogenase 1 mitochondrial OS=Homo sapiens OX=9606 GN=GLUD1 PE=1 SV=2
Q92576	5	5	5		917290	123130	116500	229479	PHD finger protein 3 OS=Homo sapiens OX=9606 GN=PHF3 PE=1 SV=3
O15226	15	7	7		571470	72016	313930	77673	NF-kappa-B-repressing factor OS=Homo sapiens OX=9606 GN=NKRF PE=1 SV=2
Q99615	21	7	7	Carbamidomethylation; Acetylation (Protein N-term)	12363	529730	439280	56441	DnaJ homolog subfamily C member 7 OS=Homo sapiens OX=9606 GN=DNAJC7 PE=1 SV=2
Q9UNZ2	13	3	3		31173	60394	261570	40573	NSFL1 cofactor p47 OS=Homo sapiens OX=9606 GN=NSFL1C PE=1 SV=2
Q12899	12	4	4		2235200	396930	121830	62166	Tripartite motif-containing protein 26 OS=Homo sapiens OX=9606 GN=TRIM26 PE=1 SV=1
O14907	28	3	3		65432	107100	133290	13735	Tax1-binding protein 3 OS=Homo sapiens OX=9606 GN=TAX1BP3 PE=1 SV=2
Q96Q11	12	4	4		393640	115740	198510	50128	CCA tRNA nucleotidyltransferase 1 mitochondrial OS=Homo sapiens OX=9606 GN=TRNT1 PE=1 SV=2
Q5JTH9	30	24	24		1275600	2379100	4188900	143702	RRP12-like protein OS=Homo sapiens OX=9606 GN=RRP12 PE=1 SV=2
P07858	19	5	5	Carbamidomethylation	135540	163130	31055	37822	Cathepsin B OS=Homo sapiens OX=9606 GN=CTSB PE=1 SV=3
Q9H8H0	14	6	6		26340	288140	46253	81124	Nucleolar protein 11 OS=Homo sapiens OX=9606 GN=NOL11 PE=1 SV=1
Q5T3I0	26	7	7		70207	1788300	657990	50381	G patch domain-containing protein 4 OS=Homo sapiens OX=9606 GN=GPATCH4 PE=1 SV=2
Q9NRW7	11	4	4		84141	8827.1	182140	65077	Vacuolar protein sorting-associated protein 45 OS=Homo sapiens OX=9606 GN=VPS45 PE=1 SV=1
O14880	34	4	4	Carbamidomethylation; Oxidation (M)	255710	47073	864680	16516	Microsomal glutathione S-transferase 3 OS=Homo sapiens OX=9606 GN=MGST3 PE=1 SV=1
Q99700	8	6	6		24069	1107800	45572	140283	Ataxin-2 OS=Homo sapiens OX=9606 GN=ATXN2 PE=1 SV=2
P48960	17	9	8	Carbamidomethylation	626740	283360	1042000	91869	Adhesion G protein-coupled receptor E5 OS=Homo sapiens OX=9606 GN=ADGRE5 PE=1 SV=4
Q969Z0	36	14	14		1772400	1030800	4863900	70738	FAST kinase domain-containing protein 4 OS=Homo sapiens OX=9606 GN=TBRG4 PE=1 SV=1
Q9H5V8	5	3	3		271070	56227	122560	92932	CUB domain-containing protein 1 OS=Homo sapiens OX=9606 GN=CDCP1 PE=1 SV=3
P48637	41	14	14	Carbamidomethylation	1468500	819730	1179600	52385	Glutathione synthetase OS=Homo sapiens OX=9606 GN=GSS PE=1 SV=1
P15121	68	14	13	Carbamidomethylation; Oxidation (M)	1548000	1910200	1723300	35853	Aldo-keto reductase family 1 member B1 OS=Homo sapiens OX=9606 GN=AKR1B1 PE=1 SV=3
Q7RTV0	34	3	3	Carbamidomethylation	11743	106640	48471	12405	PHD finger-like domain-containing protein 5A OS=Homo sapiens OX=9606 GN=PHF5A PE=1 SV=1
Q9Y383	30	12	9	Carbamidomethylation	612330	1192500	851860	46514	Putative RNA-binding protein Luc7-like 2 OS=Homo sapiens OX=9606 GN=LUC7L2 PE=1 SV=2
O00220	10	3	3		13320	2290.7	4528.9	50089	Tumor necrosis factor receptor superfamily member 10A OS=Homo sapiens OX=9606 GN=TNFRSF10A PE=1 SV=3
P08237	25	13	11	Carbamidomethylation	326560	310230	555720	85183	ATP-dependent 6-phosphofructokinase muscle type OS=Homo sapiens OX=9606 GN=PFKM PE=1 SV=2
P07741	80	12	12	Carbamidomethylation; Oxidation (M); Acetylation (Protein N-term)	3654500	1792700	1956100	19608	Adenine phosphoribosyltransferase OS=Homo sapiens OX=9606 GN=APRT PE=1 SV=2
P33527	5	4	4		99160	30427	2341	171590	Multidrug resistance-associated protein 1 OS=Homo sapiens OX=9606 GN=ABCC1 PE=1 SV=3
Q9BTX1	18	7	7		144240	217460	258470	76305	Nucleoporin NDC1 OS=Homo sapiens OX=9606 GN=NDC1 PE=1 SV=2
P48729	28	7	7		1010000	254730	2802300	38915	Casein kinase I isoform alpha OS=Homo sapiens OX=9606 GN=CSNK1A1 PE=1 SV=2
Q9H9B1	4	3	3		622710	147700	28571	141466	Histone-lysine N-methyltransferase EHMT1 OS=Homo sapiens OX=9606 GN=EHMT1 PE=1 SV=4
Q13177	25	7	7		1659600	493480	2111000	58043	Serine/threonine-protein kinase PAK 2 OS=Homo sapiens OX=9606 GN=PAK2 PE=1 SV=3
P49761	8	3	3		1000500	3645	5726.3	73515	Dual specificity protein kinase CLK3 OS=Homo sapiens OX=9606 GN=CLK3 PE=1 SV=3
Q9H7Z7	54	13	13	Oxidation (M)	1588000	782590	675510	41943	Prostaglandin E synthase 2 OS=Homo sapiens OX=9606 GN=PTGES2 PE=1 SV=1
O95983	17	4	4		42780	21546	22183	32844	Methyl-CpG-binding domain protein 3 OS=Homo sapiens OX=9606 GN=MBD3 PE=1 SV=1
P10155	27	10	10	Carbamidomethylation; Acetylation (Protein N-term)	207030	205820	527520	60671	60 kDa SS-A/Ro ribonucleoprotein OS=Homo sapiens OX=9606 GN=RO60 PE=1 SV=2
P49588	44	30	30	Carbamidomethylation; Oxidation (M); Acetylation (Protein N-term)	1108500	1075800	2528600	106810	Alanine--tRNA ligase cytoplasmic OS=Homo sapiens OX=9606 GN=AARS1 PE=1 SV=2
P0DPB6	19	3	3		132300	13935	58021	15237	DNA-directed RNA polymerases I and III subunit RPAC2 OS=Homo sapiens OX=9606 GN=POLR1D PE=1 SV=1
Q9BXS6	9	3	3		601950	180720	22244	49452	Nucleolar and spindle-associated protein 1 OS=Homo sapiens OX=9606 GN=NUSAP1 PE=1 SV=1
Q15024	15	3	3		65712	159530	128100	31821	Exosome complex component RRP42 OS=Homo sapiens OX=9606 GN=EXOSC7 PE=1 SV=3
Q14498	46	20	20	Carbamidomethylation; Oxidation (M); Acetylation (Protein N-term)	2431100	2005100	1402600	59380	RNA-binding protein 39 OS=Homo sapiens OX=9606 GN=RBM39 PE=1 SV=2
Q12888	3	3	3		69255	28905	0	213573	TP53-binding protein 1 OS=Homo sapiens OX=9606 GN=TP53BP1 PE=1 SV=2
P46459	11	6	6	Carbamidomethylation	474270	166370	678970	82594	Vesicle-fusing ATPase OS=Homo sapiens OX=9606 GN=NSF PE=1 SV=3
Q9H074	12	4	4	Carbamidomethylation	298600	41692	212190	53525	Polyadenylate-binding protein-interacting protein 1 OS=Homo sapiens OX=9606 GN=PAIP1 PE=1 SV=1
P46821	4	6	6	Carbamidomethylation	242660	59926	48169	270632	Microtubule-associated protein 1B OS=Homo sapiens OX=9606 GN=MAP1B PE=1 SV=2
Q15006	26	6	6		180020	785380	747600	34833	ER membrane protein complex subunit 2 OS=Homo sapiens OX=9606 GN=EMC2 PE=1 SV=1
Q9Y5L4	42	3	3	Carbamidomethylation	113950	409880	133820	10500	Mitochondrial import inner membrane translocase subunit Tim13 OS=Homo sapiens OX=9606 GN=TIMM13 PE=1 SV=1
P55327	60	7	7		1815200	667500	352630	24327	Tumor protein D52 OS=Homo sapiens OX=9606 GN=TPD52 PE=1 SV=2
Q14331	10	2	2		2033600	131150	51444	29172	Protein FRG1 OS=Homo sapiens OX=9606 GN=FRG1 PE=1 SV=1
Q9UH65	6	3	3		31461	28915	221630	68998	Switch-associated protein 70 OS=Homo sapiens OX=9606 GN=SWAP70 PE=1 SV=1
O43660	24	7	7		1972400	581180	380460	57194	Pleiotropic regulator 1 OS=Homo sapiens OX=9606 GN=PLRG1 PE=1 SV=1
Q8N1G4	32	13	13	Acetylation (Protein N-term)	548500	406570	813670	63473	Leucine-rich repeat-containing protein 47 OS=Homo sapiens OX=9606 GN=LRRC47 PE=1 SV=1
Q8WUM4	46	29	29	Carbamidomethylation; Acetylation (Protein N-term)	3815000	1819800	2245100	96023	Programmed cell death 6-interacting protein OS=Homo sapiens OX=9606 GN=PDCD6IP PE=1 SV=1
O60244	4	3	3		746720	111690	49969	160606	Mediator of RNA polymerase II transcription subunit 14 OS=Homo sapiens OX=9606 GN=MED14 PE=1 SV=2
Q00341	24	20	20	Acetylation (Protein N-term)	1794000	901000	1062500	141455	Vigilin OS=Homo sapiens OX=9606 GN=HDLBP PE=1 SV=2
Q9UHV9	52	6	6		301960	794490	431770	16648	Prefoldin subunit 2 OS=Homo sapiens OX=9606 GN=PFDN2 PE=1 SV=1
Q9H3R2	17	5	5	Carbamidomethylation	620550	324010	482260	54604	Mucin-13 OS=Homo sapiens OX=9606 GN=MUC13 PE=1 SV=3
Q13564	19	6	6	Carbamidomethylation	186410	190730	656150	60246	NEDD8-activating enzyme E1 regulatory subunit OS=Homo sapiens OX=9606 GN=NAE1 PE=1 SV=1
Q8TBC4	15	4	4	Carbamidomethylation	140780	14605	37549	51852	NEDD8-activating enzyme E1 catalytic subunit OS=Homo sapiens OX=9606 GN=UBA3 PE=1 SV=2
P48739	38	7	4	Carbamidomethylation	382760	40340	301370	31540	Phosphatidylinositol transfer protein beta isoform OS=Homo sapiens OX=9606 GN=PITPNB PE=1 SV=2
Q8N684	26	11	11		264620	292360	272010	52050	Cleavage and polyadenylation specificity factor subunit 7 OS=Homo sapiens OX=9606 GN=CPSF7 PE=1 SV=1
Q969S3	27	8	8		70973	762610	84449	54272	Zinc finger protein 622 OS=Homo sapiens OX=9606 GN=ZNF622 PE=1 SV=1
P49753	27	7	7		122790	383430	671540	53219	Acyl-coenzyme A thioesterase 2 mitochondrial OS=Homo sapiens OX=9606 GN=ACOT2 PE=1 SV=6
Q9Y450	15	5	5		220720	30256	38588	75473	HBS1-like protein OS=Homo sapiens OX=9606 GN=HBS1L PE=1 SV=1
O95218	26	6	6	Carbamidomethylation	16938	87576	67079	37404	Zinc finger Ran-binding domain-containing protein 2 OS=Homo sapiens OX=9606 GN=ZRANB2 PE=1 SV=2
Q96TA1	35	19	19	Carbamidomethylation; Oxidation (M)	2582800	1262400	1545800	84138	Protein Niban 2 OS=Homo sapiens OX=9606 GN=NIBAN2 PE=1 SV=3
Q68E01	3	2	2		0	11186	56620	118070	Integrator complex subunit 3 OS=Homo sapiens OX=9606 GN=INTS3 PE=1 SV=1
Q13501	48	11	11	Carbamidomethylation; Oxidation (M)	1397000	521910	609150	47687	Sequestosome-1 OS=Homo sapiens OX=9606 GN=SQSTM1 PE=1 SV=1
Q14151	26	20	11	Carbamidomethylation; Acetylation (Protein N-term)	144960	1244200	322120	107474	Scaffold attachment factor B2 OS=Homo sapiens OX=9606 GN=SAFB2 PE=1 SV=1
Q9UII2	18	2	2		0	347830	32145	12249	ATPase inhibitor mitochondrial OS=Homo sapiens OX=9606 GN=ATP5IF1 PE=1 SV=1
P62633	44	6	6	Carbamidomethylation	609500	926790	299410	19463	Cellular nucleic acid-binding protein OS=Homo sapiens OX=9606 GN=CNBP PE=1 SV=1
Q9BQA1	30	7	7	Carbamidomethylation	517460	520740	486820	36724	Methylosome protein 50 OS=Homo sapiens OX=9606 GN=WDR77 PE=1 SV=1
Q8N766	30	17	17		2803700	784110	2490200	111759	ER membrane protein complex subunit 1 OS=Homo sapiens OX=9606 GN=EMC1 PE=1 SV=1
Q9NTJ5	13	7	7	Acetylation (Protein N-term)	35758	814110	509200	66967	Phosphatidylinositol-3-phosphatase SAC1 OS=Homo sapiens OX=9606 GN=SACM1L PE=1 SV=2
Q6PGP7	5	4	4		253580	19581	43738	175485	Tetratricopeptide repeat protein 37 OS=Homo sapiens OX=9606 GN=TTC37 PE=1 SV=1
Q9H8Y5	19	7	7		65265	314090	1011200	80927	Ankyrin repeat and zinc finger domain-containing protein 1 OS=Homo sapiens OX=9606 GN=ANKZF1 PE=1 SV=1
P07602	28	13	13	Carbamidomethylation; Oxidation (M)	1489300	2533400	391210	58113	Prosaposin OS=Homo sapiens OX=9606 GN=PSAP PE=1 SV=2
Q7Z417	23	10	10		342310	170950	411060	76121	Nuclear fragile X mental retardation-interacting protein 2 OS=Homo sapiens OX=9606 GN=NUFIP2 PE=1 SV=1
Q13206	15	9	9		1392300	369370	730950	100888	Probable ATP-dependent RNA helicase DDX10 OS=Homo sapiens OX=9606 GN=DDX10 PE=1 SV=2
Q8IZ69	5	2	2		198250	7331.9	69746	68726	tRNA (uracil-5-)-methyltransferase homolog A OS=Homo sapiens OX=9606 GN=TRMT2A PE=1 SV=2
Q9NZJ7	24	5	5		28682	133800	147930	41544	Mitochondrial carrier homolog 1 OS=Homo sapiens OX=9606 GN=MTCH1 PE=1 SV=1
P36955	11	3	3		161490	161680	409230	46312	Pigment epithelium-derived factor OS=Homo sapiens OX=9606 GN=SERPINF1 PE=1 SV=4
P49643	11	4	4		157960	31041	577320	58806	DNA primase large subunit OS=Homo sapiens OX=9606 GN=PRIM2 PE=1 SV=2
Q8NFJ5	14	3	3		287240	797790	61810	40251	Retinoic acid-induced protein 3 OS=Homo sapiens OX=9606 GN=GPRC5A PE=1 SV=2
P17987	57	25	24	Carbamidomethylation; Oxidation (M); Acetylation (Protein N-term)	2463800	3144700	3106500	60344	T-complex protein 1 subunit alpha OS=Homo sapiens OX=9606 GN=TCP1 PE=1 SV=1
P00734	8	4	4	Carbamidomethylation	17896	848730	198250	70037	Prothrombin OS=Homo sapiens OX=9606 GN=F2 PE=1 SV=2
P30876	24	19	19	Carbamidomethylation	1498500	822590	2162300	133896	DNA-directed RNA polymerase II subunit RPB2 OS=Homo sapiens OX=9606 GN=POLR2B PE=1 SV=1
Q15382	29	4	4		1067700	159080	180050	20497	GTP-binding protein Rheb OS=Homo sapiens OX=9606 GN=RHEB PE=1 SV=1
Q96CW5	7	4	4		36059	312070	145950	103571	Gamma-tubulin complex component 3 OS=Homo sapiens OX=9606 GN=TUBGCP3 PE=1 SV=2
P51858	70	15	13	Carbamidomethylation	3513700	3227500	2299600	26788	Hepatoma-derived growth factor OS=Homo sapiens OX=9606 GN=HDGF PE=1 SV=1
Q08722	6	2	2		25234	952870	538770	35214	Leukocyte surface antigen CD47 OS=Homo sapiens OX=9606 GN=CD47 PE=1 SV=1
Q9H4L4	11	5	5		35014	346800	235010	65010	Sentrin-specific protease 3 OS=Homo sapiens OX=9606 GN=SENP3 PE=1 SV=2
O60216	16	5	5		129180	76070	163460	71690	Double-strand-break repair protein rad21 homolog OS=Homo sapiens OX=9606 GN=RAD21 PE=1 SV=2
Q9H2U1	23	16	15		1363400	978310	619700	114760	ATP-dependent DNA/RNA helicase DHX36 OS=Homo sapiens OX=9606 GN=DHX36 PE=1 SV=2
Q9Y2A7	5	4	4		822040	9521.1	390420	128790	Nck-associated protein 1 OS=Homo sapiens OX=9606 GN=NCKAP1 PE=1 SV=1
Q5R3I4	11	3	3		58943	3901.7	3373.8	52787	Tetratricopeptide repeat protein 38 OS=Homo sapiens OX=9606 GN=TTC38 PE=1 SV=1
Q92922	12	7	6	Carbamidomethylation; Acetylation (Protein N-term)	184900	52728	327030	122867	SWI/SNF complex subunit SMARCC1 OS=Homo sapiens OX=9606 GN=SMARCC1 PE=1 SV=3
P05362	21	10	10	Carbamidomethylation	389740	113120	89790	57825	Intercellular adhesion molecule 1 OS=Homo sapiens OX=9606 GN=ICAM1 PE=1 SV=2
Q9NSI2	21	3	3		7198.7	10083	8516	25456	Protein FAM207A OS=Homo sapiens OX=9606 GN=FAM207A PE=1 SV=2
P53004	31	6	6		503970	341310	1136200	33428	Biliverdin reductase A OS=Homo sapiens OX=9606 GN=BLVRA PE=1 SV=2
Q8N3D4	2	2	2		48310	0	0	161854	EH domain-binding protein 1-like protein 1 OS=Homo sapiens OX=9606 GN=EHBP1L1 PE=1 SV=2
Q9UKS6	42	16	16	Carbamidomethylation	1543500	2376200	2187400	48487	Protein kinase C and casein kinase substrate in neurons protein 3 OS=Homo sapiens OX=9606 GN=PACSIN3 PE=1 SV=2
O75717	5	3	3		103800	140270	221000	125967	WD repeat and HMG-box DNA-binding protein 1 OS=Homo sapiens OX=9606 GN=WDHD1 PE=1 SV=1
Q2TAL8	5	3	3		10182	14146	220050	86436	Transcriptional regulator QRICH1 OS=Homo sapiens OX=9606 GN=QRICH1 PE=1 SV=1
O94776	26	13	12		1277500	301430	1368300	75023	Metastasis-associated protein MTA2 OS=Homo sapiens OX=9606 GN=MTA2 PE=1 SV=1
Q9Y6E2	27	9	8		452800	276060	677930	48162	Basic leucine zipper and W2 domain-containing protein 2 OS=Homo sapiens OX=9606 GN=BZW2 PE=1 SV=1
P82663	29	6	6		309790	155530	457300	20116	28S ribosomal protein S25 mitochondrial OS=Homo sapiens OX=9606 GN=MRPS25 PE=1 SV=1
O75915	29	6	6	Oxidation (M); Acetylation (Protein N-term)	1320100	1706200	1271400	21615	PRA1 family protein 3 OS=Homo sapiens OX=9606 GN=ARL6IP5 PE=1 SV=1
P61201	15	5	5		333720	168200	330710	51597	COP9 signalosome complex subunit 2 OS=Homo sapiens OX=9606 GN=COPS2 PE=1 SV=1
Q9BQ69	20	4	4	Carbamidomethylation	512660	178400	62886	35505	ADP-ribose glycohydrolase MACROD1 OS=Homo sapiens OX=9606 GN=MACROD1 PE=1 SV=2
O75396	60	14	14	Oxidation (M)	2293900	2495600	1695500	24593	Vesicle-trafficking protein SEC22b OS=Homo sapiens OX=9606 GN=SEC22B PE=1 SV=4
Q9GZZ9	17	3	3	Carbamidomethylation	247440	96806	16367	44863	Ubiquitin-like modifier-activating enzyme 5 OS=Homo sapiens OX=9606 GN=UBA5 PE=1 SV=1
Q9NUQ6	6	2	2	Carbamidomethylation	75299	962330	3306.6	61729	SPATS2-like protein OS=Homo sapiens OX=9606 GN=SPATS2L PE=1 SV=2
Q96MU7	3	2	2		2934.6	51761	18022	84700	YTH domain-containing protein 1 OS=Homo sapiens OX=9606 GN=YTHDC1 PE=1 SV=3
Q14203	7	5	5		361740	124870	360150	141694	Dynactin subunit 1 OS=Homo sapiens OX=9606 GN=DCTN1 PE=1 SV=3
Q15645	24	8	7	Carbamidomethylation	788870	292990	406690	48551	Pachytene checkpoint protein 2 homolog OS=Homo sapiens OX=9606 GN=TRIP13 PE=1 SV=2
P54136	39	22	22	Carbamidomethylation; Acetylation (Protein N-term)	1298900	882460	1301500	75379	Arginine--tRNA ligase cytoplasmic OS=Homo sapiens OX=9606 GN=RARS1 PE=1 SV=2
P61088	55	7	7		1222600	883010	728830	17138	Ubiquitin-conjugating enzyme E2 N OS=Homo sapiens OX=9606 GN=UBE2N PE=1 SV=1
Q9UKD2	52	13	13	Carbamidomethylation	779540	2613100	1298600	27560	mRNA turnover protein 4 homolog OS=Homo sapiens OX=9606 GN=MRTO4 PE=1 SV=2
Q9NPJ3	31	4	4	Acetylation (Protein N-term)	198070	319020	149720	14960	Acyl-coenzyme A thioesterase 13 OS=Homo sapiens OX=9606 GN=ACOT13 PE=1 SV=1
Q9NP92	17	4	4	Carbamidomethylation	149210	143710	222930	50365	39S ribosomal protein S30 mitochondrial OS=Homo sapiens OX=9606 GN=MRPS30 PE=1 SV=2
Q9ULW0	6	3	3		224570	33341	41812	85653	Targeting protein for Xklp2 OS=Homo sapiens OX=9606 GN=TPX2 PE=1 SV=2
O60784	20	5	5	Acetylation (Protein N-term)	205920	14956	30477	53818	Target of Myb protein 1 OS=Homo sapiens OX=9606 GN=TOM1 PE=1 SV=2
P61019	70	12	6	Carbamidomethylation	1116700	335040	208440	23546	Ras-related protein Rab-2A OS=Homo sapiens OX=9606 GN=RAB2A PE=1 SV=1
Q9BXY0	23	6	6	Acetylation (Protein N-term)	359900	213810	120640	35369	Protein MAK16 homolog OS=Homo sapiens OX=9606 GN=MAK16 PE=1 SV=2
Q99436	38	10	10	Carbamidomethylation; Oxidation (M)	831370	522120	656850	29965	Proteasome subunit beta type-7 OS=Homo sapiens OX=9606 GN=PSMB7 PE=1 SV=1
Q9UHB6	27	17	17	Carbamidomethylation	367950	178280	698350	85226	LIM domain and actin-binding protein 1 OS=Homo sapiens OX=9606 GN=LIMA1 PE=1 SV=1
Q9Y3F4	66	18	18	Carbamidomethylation	2055600	3048900	2745900	38438	Serine-threonine kinase receptor-associated protein OS=Homo sapiens OX=9606 GN=STRAP PE=1 SV=1
Q5RI15	33	4	4	Carbamidomethylation; Acetylation (Protein N-term)	12768	331730	137340	13291	Cytochrome c oxidase assembly protein COX20 mitochondrial OS=Homo sapiens OX=9606 GN=COX20 PE=1 SV=2
P11908	45	11	3	Carbamidomethylation; Oxidation (M)	476000	77310	223910	34769	Ribose-phosphate pyrophosphokinase 2 OS=Homo sapiens OX=9606 GN=PRPS2 PE=1 SV=2
Q13243	18	4	3		129120	228000	88611	31264	Serine/arginine-rich splicing factor 5 OS=Homo sapiens OX=9606 GN=SRSF5 PE=1 SV=1
Q9Y3D6	24	3	3		502120	206740	91703	16938	Mitochondrial fission 1 protein OS=Homo sapiens OX=9606 GN=FIS1 PE=1 SV=2
O15234	7	3	3		1561.6	7095.4	27270	76278	Protein CASC3 OS=Homo sapiens OX=9606 GN=CASC3 PE=1 SV=2
O43488	13	3	3		13677	67309	142750	39589	Aflatoxin B1 aldehyde reductase member 2 OS=Homo sapiens OX=9606 GN=AKR7A2 PE=1 SV=3
P17568	20	3	3		156040	38174	141270	16402	NADH dehydrogenase [ubiquinone] 1 beta subcomplex subunit 7 OS=Homo sapiens OX=9606 GN=NDUFB7 PE=1 SV=4
Q14108	27	10	9		588160	390790	235830	54290	Lysosome membrane protein 2 OS=Homo sapiens OX=9606 GN=SCARB2 PE=1 SV=2
Q12904	76	15	15	Carbamidomethylation; Oxidation (M)	1873100	1274800	1383100	34353	Aminoacyl tRNA synthase complex-interacting multifunctional protein 1 OS=Homo sapiens OX=9606 GN=AIMP1 PE=1 SV=2
Q9GZZ1	31	5	5	Carbamidomethylation	1541800	71481	422230	19398	N-alpha-acetyltransferase 50 OS=Homo sapiens OX=9606 GN=NAA50 PE=1 SV=1
Q9NQ88	19	3	3		2674600	661500	515170	30063	Fructose-2 6-bisphosphatase TIGAR OS=Homo sapiens OX=9606 GN=TIGAR PE=1 SV=1
P19971	11	3	3		327580	65939	56183	49956	Thymidine phosphorylase OS=Homo sapiens OX=9606 GN=TYMP PE=1 SV=2
Q16698	43	9	9	Carbamidomethylation	375850	636380	438680	36068	2 4-dienoyl-CoA reductase [(3E)-enoyl-CoA-producing] mitochondrial OS=Homo sapiens OX=9606 GN=DECR1 PE=1 SV=1
O43504	48	3	3	Acetylation (Protein N-term)	81620	192960	39065	9614	Ragulator complex protein LAMTOR5 OS=Homo sapiens OX=9606 GN=LAMTOR5 PE=1 SV=1
P61619	11	3	3	Carbamidomethylation	0	90184	555190	52265	Protein transport protein Sec61 subunit alpha isoform 1 OS=Homo sapiens OX=9606 GN=SEC61A1 PE=1 SV=2
Q9UL15	7	2	2	Carbamidomethylation	70617	5072.8	41781	51200	BAG family molecular chaperone regulator 5 OS=Homo sapiens OX=9606 GN=BAG5 PE=1 SV=1
O15446	14	3	3		84686	176430	15396	54986	DNA-directed RNA polymerase I subunit RPA34 OS=Homo sapiens OX=9606 GN=POLR1G PE=1 SV=1
Q8N183	46	6	6		395530	746260	305120	19856	NADH dehydrogenase [ubiquinone] 1 alpha subcomplex assembly factor 2 OS=Homo sapiens OX=9606 GN=NDUFAF2 PE=1 SV=1
Q5XKP0	36	2	2		156600	49800	25534	13087	MICOS complex subunit MIC13 OS=Homo sapiens OX=9606 GN=MICOS13 PE=1 SV=1
Q53GS7	16	7	7	Carbamidomethylation	763790	469850	440570	79836	Nucleoporin GLE1 OS=Homo sapiens OX=9606 GN=GLE1 PE=1 SV=2
Q9UHA4	31	2	2		257400	17427	363430	13623	Ragulator complex protein LAMTOR3 OS=Homo sapiens OX=9606 GN=LAMTOR3 PE=1 SV=1
Q14807	9	4	4		283320	235040	196530	73262	Kinesin-like protein KIF22 OS=Homo sapiens OX=9606 GN=KIF22 PE=1 SV=5
Q70UQ0	27	7	7		18591	196220	302010	39309	Inhibitor of nuclear factor kappa-B kinase-interacting protein OS=Homo sapiens OX=9606 GN=IKBIP PE=1 SV=1
Q5JPE7	43	35	35	Carbamidomethylation	2147900	1022600	1442700	139439	Nodal modulator 2 OS=Homo sapiens OX=9606 GN=NOMO2 PE=1 SV=1
Q6P1M0	10	5	5		2232500	916300	788870	72064	Long-chain fatty acid transport protein 4 OS=Homo sapiens OX=9606 GN=SLC27A4 PE=1 SV=1
O75436	26	5	5		48171	52461	162170	38170	Vacuolar protein sorting-associated protein 26A OS=Homo sapiens OX=9606 GN=VPS26A PE=1 SV=2
Q03518	22	8	8		366380	379660	216890	87218	Antigen peptide transporter 1 OS=Homo sapiens OX=9606 GN=TAP1 PE=1 SV=2
Q8WVM8	41	17	17	Carbamidomethylation; Acetylation (Protein N-term)	360750	919620	767130	72380	Sec1 family domain-containing protein 1 OS=Homo sapiens OX=9606 GN=SCFD1 PE=1 SV=4
Q96PZ0	35	15	15		578450	934650	249220	75035	Pseudouridylate synthase 7 homolog OS=Homo sapiens OX=9606 GN=PUS7 PE=1 SV=2
Q96SY0	11	4	4		20969	1965.2	24417	57471	Integrator complex subunit 14 OS=Homo sapiens OX=9606 GN=INTS14 PE=1 SV=2
P09493	46	15	5		723820	503130	940200	32709	Tropomyosin alpha-1 chain OS=Homo sapiens OX=9606 GN=TPM1 PE=1 SV=2
Q9P2N5	9	5	4		3067600	108710	695080	118718	RNA-binding protein 27 OS=Homo sapiens OX=9606 GN=RBM27 PE=1 SV=2
O95295	45	3	3	Acetylation (Protein N-term)	0	19419	0	14874	SNARE-associated protein Snapin OS=Homo sapiens OX=9606 GN=SNAPIN PE=1 SV=1
Q9BSC4	16	8	8		203560	140270	542180	80302	Nucleolar protein 10 OS=Homo sapiens OX=9606 GN=NOL10 PE=1 SV=1
O00487	32	6	6		634670	456620	1310200	34577	26S proteasome non-ATPase regulatory subunit 14 OS=Homo sapiens OX=9606 GN=PSMD14 PE=1 SV=1
Q9NXW2	22	5	5	Acetylation (Protein N-term)	33406	210830	0	41860	DnaJ homolog subfamily B member 12 OS=Homo sapiens OX=9606 GN=DNAJB12 PE=1 SV=5
Q7L576	5	5	5		20961	101920	162270	145182	Cytoplasmic FMR1-interacting protein 1 OS=Homo sapiens OX=9606 GN=CYFIP1 PE=1 SV=1
Q96KQ7	4	2	2	Acetylation (Protein N-term)	188060	11087	21660	132370	Histone-lysine N-methyltransferase EHMT2 OS=Homo sapiens OX=9606 GN=EHMT2 PE=1 SV=3
Q96TA2	13	7	7		745550	520930	394760	86455	ATP-dependent zinc metalloprotease YME1L1 OS=Homo sapiens OX=9606 GN=YME1L1 PE=1 SV=2
Q9BVJ6	29	15	15		2141500	1971000	1054700	87978	U3 small nucleolar RNA-associated protein 14 homolog A OS=Homo sapiens OX=9606 GN=UTP14A PE=1 SV=1
Q7Z4H8	8	3	3		74228	6469.7	31121	58573	Protein O-glucosyltransferase 3 OS=Homo sapiens OX=9606 GN=POGLUT3 PE=1 SV=2
Q9Y3B8	14	2	2		111910	24492	36522	26833	Oligoribonuclease mitochondrial OS=Homo sapiens OX=9606 GN=REXO2 PE=1 SV=3
P46934	3	2	2		440100	4439.5	87883	149114	E3 ubiquitin-protein ligase NEDD4 OS=Homo sapiens OX=9606 GN=NEDD4 PE=1 SV=4
Q93008	2	4	4		39449	9297.5	391690	290461	Probable ubiquitin carboxyl-terminal hydrolase FAF-X OS=Homo sapiens OX=9606 GN=USP9X PE=1 SV=4
Q13404	60	8	3	Oxidation (M)	265630	455000	453680	16495	Ubiquitin-conjugating enzyme E2 variant 1 OS=Homo sapiens OX=9606 GN=UBE2V1 PE=1 SV=2
O00567	52	28	28	Carbamidomethylation; Oxidation (M)	2995300	6869600	5144500	66050	Nucleolar protein 56 OS=Homo sapiens OX=9606 GN=NOP56 PE=1 SV=4
Q9UBE0	38	10	10	Carbamidomethylation; Oxidation (M)	1351500	414160	648150	38450	SUMO-activating enzyme subunit 1 OS=Homo sapiens OX=9606 GN=SAE1 PE=1 SV=1
P49721	71	14	14	Carbamidomethylation; Oxidation (M); Acetylation (Protein N-term)	2645000	996110	2856600	22836	Proteasome subunit beta type-2 OS=Homo sapiens OX=9606 GN=PSMB2 PE=1 SV=1
O43813	22	6	6	Carbamidomethylation	373520	524620	374340	45283	Glutathione S-transferase LANCL1 OS=Homo sapiens OX=9606 GN=LANCL1 PE=1 SV=1
P37198	15	5	5	Acetylation (Protein N-term)	317310	54601	75539	53255	Nuclear pore glycoprotein p62 OS=Homo sapiens OX=9606 GN=NUP62 PE=1 SV=3
P15170	49	19	9	Carbamidomethylation; Oxidation (M)	1102100	506740	717860	55756	Eukaryotic peptide chain release factor GTP-binding subunit ERF3A OS=Homo sapiens OX=9606 GN=GSPT1 PE=1 SV=1
O75976	6	4	4		208280	73906	365590	152931	Carboxypeptidase D OS=Homo sapiens OX=9606 GN=CPD PE=1 SV=2
P29966	20	3	3		24388	129740	7079.5	31555	Myristoylated alanine-rich C-kinase substrate OS=Homo sapiens OX=9606 GN=MARCKS PE=1 SV=4
Q9UNP9	21	6	4		130720	294250	887040	33431	Peptidyl-prolyl cis-trans isomerase E OS=Homo sapiens OX=9606 GN=PPIE PE=1 SV=1
Q9H3U1	11	7	7	Carbamidomethylation	211130	163280	423280	103077	Protein unc-45 homolog A OS=Homo sapiens OX=9606 GN=UNC45A PE=1 SV=1
O43592	5	3	3	Carbamidomethylation	147170	29993	124390	109964	Exportin-T OS=Homo sapiens OX=9606 GN=XPOT PE=1 SV=2
O75695	10	4	4		0	18735	147920	39641	Protein XRP2 OS=Homo sapiens OX=9606 GN=RP2 PE=1 SV=4
P54578	42	13	13	Carbamidomethylation; Oxidation (M)	1125200	868320	1854300	56069	Ubiquitin carboxyl-terminal hydrolase 14 OS=Homo sapiens OX=9606 GN=USP14 PE=1 SV=3
Q14139	8	5	5	Carbamidomethylation	376760	265370	244610	122560	Ubiquitin conjugation factor E4 A OS=Homo sapiens OX=9606 GN=UBE4A PE=1 SV=2
Q9BTE6	11	2	2		184350	54769	10870	45480	Alanyl-tRNA editing protein Aarsd1 OS=Homo sapiens OX=9606 GN=AARSD1 PE=1 SV=2
Q6ZW31	3	2	2		409370	31284	0	79793	Rho GTPase-activating protein SYDE1 OS=Homo sapiens OX=9606 GN=SYDE1 PE=1 SV=1
Q8NI27	6	7	7	Acetylation (Protein N-term)	44498	75010	152510	182774	THO complex subunit 2 OS=Homo sapiens OX=9606 GN=THOC2 PE=1 SV=2
Q9UK61	4	3	3		684820	137670	200630	189030	Protein TASOR OS=Homo sapiens OX=9606 GN=TASOR PE=1 SV=3
Q8NFQ8	28	6	5		0	90616	28712	51263	Torsin-1A-interacting protein 2 OS=Homo sapiens OX=9606 GN=TOR1AIP2 PE=1 SV=1
Q14562	8	6	6		584290	335580	323630	139314	ATP-dependent RNA helicase DHX8 OS=Homo sapiens OX=9606 GN=DHX8 PE=1 SV=1
Q14C86	8	8	8		442870	209170	204460	164979	GTPase-activating protein and VPS9 domain-containing protein 1 OS=Homo sapiens OX=9606 GN=GAPVD1 PE=1 SV=2
O60610	21	21	21	Carbamidomethylation	2197900	237230	638870	141347	Protein diaphanous homolog 1 OS=Homo sapiens OX=9606 GN=DIAPH1 PE=1 SV=2
P30533	24	8	8		204820	439270	622620	41466	Alpha-2-macroglobulin receptor-associated protein OS=Homo sapiens OX=9606 GN=LRPAP1 PE=1 SV=1
Q15121	17	2	2	Oxidation (M)	30932	36769	12116	15040	Astrocytic phosphoprotein PEA-15 OS=Homo sapiens OX=9606 GN=PEA15 PE=1 SV=2
P09417	28	4	4	Acetylation (Protein N-term)	117850	61200	236340	25790	Dihydropteridine reductase OS=Homo sapiens OX=9606 GN=QDPR PE=1 SV=2
O43681	34	8	8	Carbamidomethylation; Oxidation (M)	893690	811520	383950	38793	ATPase GET3 OS=Homo sapiens OX=9606 GN=GET3 PE=1 SV=2
Q96JM3	9	4	4		110760	84211	671670	89099	Chromosome alignment-maintaining phosphoprotein 1 OS=Homo sapiens OX=9606 GN=CHAMP1 PE=1 SV=2
Q53HL2	23	5	5		269590	140510	320310	31323	Borealin OS=Homo sapiens OX=9606 GN=CDCA8 PE=1 SV=2
P17050	11	3	3	Carbamidomethylation	8967.5	4461.2	145240	46565	Alpha-N-acetylgalactosaminidase OS=Homo sapiens OX=9606 GN=NAGA PE=1 SV=2
O95347	18	17	17		2129400	780510	1427800	135656	Structural maintenance of chromosomes protein 2 OS=Homo sapiens OX=9606 GN=SMC2 PE=1 SV=2
Q92552	37	12	12		517070	780270	991520	47611	28S ribosomal protein S27 mitochondrial OS=Homo sapiens OX=9606 GN=MRPS27 PE=1 SV=3
Q92734	24	5	5	Carbamidomethylation; Oxidation (M)	669030	367060	492410	43448	Protein TFG OS=Homo sapiens OX=9606 GN=TFG PE=1 SV=2
Q99590	6	6	6	Carbamidomethylation	112860	93235	1046200	164651	Protein SCAF11 OS=Homo sapiens OX=9606 GN=SCAF11 PE=1 SV=2
Q96EL2	28	3	3		4191.7	61833	45304	19015	28S ribosomal protein S24 mitochondrial OS=Homo sapiens OX=9606 GN=MRPS24 PE=1 SV=1
P33897	15	7	7		391830	2744300	527570	82937	ATP-binding cassette sub-family D member 1 OS=Homo sapiens OX=9606 GN=ABCD1 PE=1 SV=2
Q93052	10	5	5	Carbamidomethylation	14403	64493	20571	65746	Lipoma-preferred partner OS=Homo sapiens OX=9606 GN=LPP PE=1 SV=1
Q9UPN4	3	2	2		0	32329	429220	122149	Centrosomal protein of 131 kDa OS=Homo sapiens OX=9606 GN=CEP131 PE=1 SV=3
Q15269	16	12	12		1097900	484570	603030	102452	Periodic tryptophan protein 2 homolog OS=Homo sapiens OX=9606 GN=PWP2 PE=2 SV=2
P17480	25	17	17		1240500	1339800	2694200	89406	Nucleolar transcription factor 1 OS=Homo sapiens OX=9606 GN=UBTF PE=1 SV=1
Q13907	37	5	5	Carbamidomethylation	1232000	226710	124520	26319	Isopentenyl-diphosphate Delta-isomerase 1 OS=Homo sapiens OX=9606 GN=IDI1 PE=1 SV=2
P62191	58	21	20	Carbamidomethylation	1474600	1017600	1005600	49185	26S proteasome regulatory subunit 4 OS=Homo sapiens OX=9606 GN=PSMC1 PE=1 SV=1
Q9NPL8	15	3	3		7493.9	3884.5	80575	32178	Complex I assembly factor TIMMDC1 mitochondrial OS=Homo sapiens OX=9606 GN=TIMMDC1 PE=1 SV=2
Q9BUL8	17	3	3		589070	149980	736150	24702	Programmed cell death protein 10 OS=Homo sapiens OX=9606 GN=PDCD10 PE=1 SV=1
Q05932	15	5	5	Carbamidomethylation	197390	5966.7	547080	64609	Folylpolyglutamate synthase mitochondrial OS=Homo sapiens OX=9606 GN=FPGS PE=1 SV=3
Q9H9P8	14	4	4		23630	24416	94998	50316	L-2-hydroxyglutarate dehydrogenase mitochondrial OS=Homo sapiens OX=9606 GN=L2HGDH PE=1 SV=3
P10909	23	6	6	Carbamidomethylation	226270	197770	47054	52495	Clusterin OS=Homo sapiens OX=9606 GN=CLU PE=1 SV=1
O43493	10	3	3		0	57401	7468.3	45880	Trans-Golgi network integral membrane protein 2 OS=Homo sapiens OX=9606 GN=TGOLN2 PE=1 SV=4
Q9HB40	11	4	4		151860	131910	78752	50831	Retinoid-inducible serine carboxypeptidase OS=Homo sapiens OX=9606 GN=SCPEP1 PE=1 SV=1
Q9UBX3	21	4	4		582340	409520	1771500	31282	Mitochondrial dicarboxylate carrier OS=Homo sapiens OX=9606 GN=SLC25A10 PE=1 SV=2
Q9BT78	34	9	9	Carbamidomethylation	253870	329190	136750	46269	COP9 signalosome complex subunit 4 OS=Homo sapiens OX=9606 GN=COPS4 PE=1 SV=1
Q7Z6Z7	8	19	19	Carbamidomethylation	523450	508760	568830	481896	E3 ubiquitin-protein ligase HUWE1 OS=Homo sapiens OX=9606 GN=HUWE1 PE=1 SV=3
Q9NUQ8	10	5	5		205350	247970	373140	79745	ATP-binding cassette sub-family F member 3 OS=Homo sapiens OX=9606 GN=ABCF3 PE=1 SV=2
Q9Y5X1	5	2	2		0	97667	45628	66592	Sorting nexin-9 OS=Homo sapiens OX=9606 GN=SNX9 PE=1 SV=1
Q16762	21	4	4		23805	51792	212130	33429	Thiosulfate sulfurtransferase OS=Homo sapiens OX=9606 GN=TST PE=1 SV=4
Q9NVU7	16	9	9		1190300	782160	948380	79871	Protein SDA1 homolog OS=Homo sapiens OX=9606 GN=SDAD1 PE=1 SV=3
O95486	4	3	3		264400	21064	276170	119749	Protein transport protein Sec24A OS=Homo sapiens OX=9606 GN=SEC24A PE=1 SV=2
Q7L2H7	43	12	12	Carbamidomethylation; Oxidation (M); Acetylation (Protein N-term)	1212500	569410	3631400	42503	Eukaryotic translation initiation factor 3 subunit M OS=Homo sapiens OX=9606 GN=EIF3M PE=1 SV=1
Q96DG6	20	4	4	Carbamidomethylation; Acetylation (Protein N-term)	134140	341530	101080	28048	Carboxymethylenebutenolidase homolog OS=Homo sapiens OX=9606 GN=CMBL PE=1 SV=1
Q13573	44	17	17	Acetylation (Protein N-term)	1175600	969760	1945800	61495	SNW domain-containing protein 1 OS=Homo sapiens OX=9606 GN=SNW1 PE=1 SV=1
Q52LJ0	40	12	9	Carbamidomethylation; Acetylation (Protein N-term)	136050	402830	239220	45547	Protein FAM98B OS=Homo sapiens OX=9606 GN=FAM98B PE=1 SV=2
Q9Y3D7	30	2	2		119220	7610.2	184810	13825	Mitochondrial import inner membrane translocase subunit TIM16 OS=Homo sapiens OX=9606 GN=PAM16 PE=1 SV=2
Q9Y3C8	14	2	2	Carbamidomethylation	4690.8	270230	197650	19458	Ubiquitin-fold modifier-conjugating enzyme 1 OS=Homo sapiens OX=9606 GN=UFC1 PE=1 SV=3
Q6PJG2	8	4	4		167500	5148.4	38559	114989	Mitotic deacetylase-associated SANT domain protein OS=Homo sapiens OX=9606 GN=MIDEAS PE=1 SV=2
O75153	13	13	13		193210	446970	711620	146669	Clustered mitochondria protein homolog OS=Homo sapiens OX=9606 GN=CLUH PE=1 SV=2
Q9UJ83	12	5	5		120580	152290	394380	63729	2-hydroxyacyl-CoA lyase 1 OS=Homo sapiens OX=9606 GN=HACL1 PE=1 SV=2
Q9Y639	10	3	3		1386200	1075600	901150	44387	Neuroplastin OS=Homo sapiens OX=9606 GN=NPTN PE=1 SV=2
Q9BSD7	28	3	3		238250	69621	0	20713	Cancer-related nucleoside-triphosphatase OS=Homo sapiens OX=9606 GN=NTPCR PE=1 SV=1
O75306	43	13	13		1240400	801000	2488500	52546	NADH dehydrogenase [ubiquinone] iron-sulfur protein 2 mitochondrial OS=Homo sapiens OX=9606 GN=NDUFS2 PE=1 SV=2
Q9Y4R8	4	2	2		80997	151260	123000	91747	Telomere length regulation protein TEL2 homolog OS=Homo sapiens OX=9606 GN=TELO2 PE=1 SV=2
Q8NE86	17	4	4	Carbamidomethylation	531190	188520	246440	39867	Calcium uniporter protein mitochondrial OS=Homo sapiens OX=9606 GN=MCU PE=1 SV=1
[truncated: 1,879 more rows]

## Sheet: SP3-1000cells-peptide
Peptide	Avg. ppm	Avg. Area	Sample 1	Sample 2	Sample 3	Max Ratio	#Vector	Accession
LTFIPGFIGSLK	1.8	30981	0	0	77653	64	1	Q96RT1
DLYANTVLSGGTTMYPGIADR	2.2	23071000	34268000	24529000	8343800	4.11	2	P60709
YISPDQLADLYK	2.3	10113000	11095000	17173000	6221300	2.88	1	P06733
AQIFANTVDNAR	2.8	5880300	136220	4042200	1367800	64	1	P05783
VAPEEHPVLLTEAPLNPK	2.2	53932000	28071000	87081000	28204000	3.1	2	P60709
TAFQEALDAAGDKLVVVDFSATWC(+57.02)GPC(+57.02)K	1.7	1244700	2312400	442280	2223900	64	2	P10599
SIYGEKFEDENFILK	1.8	12196000	14856000	10849000	4089800	4.64	2	P62937
TTGIVMDSGDGVTHTVPIYEGYALPHAILR	2.1	36524000	40815000	11121000	29102000	5.85	2	P60709
VTDALNATR	2.2	2079800	39596	3579100	350530	64	1	P10809
AVFPSIVGRPR	3.3	52307000	6296200	33081000	146630000	23.29	2	P60709
LEGLTDEINFLR	1.8	9447700	9175200	5778400	2117000	9.79	1	P05787
LLEGEESR	2.8	1913700	27123	2991000	111510	64	1	P05787
ESYSVYVYK	2.8	18757000	298910	6227400	2046900	64	1	P57053
VTIAQGGVLPNIQAVLLPK	2.2	199060000	180540000	36113000	71883000	14.06	2	P16104
IIAPPERK	2.5	1813700	44682	5065100	332720	64	1	P60709
VEIIANDQGNR	3.5	2790900	63327	3643600	967220	64	1	P11021
APIIAVTR	3.1	2575900	150860	7660000	1204100	50.78	1	P14618
HQGVMVGMGQK	4.1	5835600	86845	7078700	4202300	64	2	P60709
AAVPSGASTGIYEALELR	1.7	15863000	31443000	21893000	6406900	8.48	2	P06733
LAMQEFMILPVGAANFR	2	8143200	16355000	4580600	5380600	3.57	2	P06733
ILGGSVLHLVLALR	1.8	1554600	2528000	328680	3361600	64	2	Q15843
YALYDATYETK	2.7	2838300	369920	7800600	1111200	21.09	1	P23528
EGDVLTLLESER	2.6	2308900	857310	1329800	325760	20.64	1	P62857
YFPTQALNFAFK	2.3	4622400	2413600	482810	6162300	19.53	1	P05141
LLLPGELAK	3.1	58210000	4147900	25507000	13379000	45.76	1	P06899
IMNTFSVVPSPK	2.8	9238400	920300	5771000	5937900	26.43	1	P07437
D(+42.01)DDIAALVVDNGSGM(+15.99)C(+57.02)K	1.2	1407500	3177300	2036800	415960	64	1	P60709
GYSFTTTAER	3.2	14077000	459730	30496000	8418200	64	1	P60709
KGVITVK	1.5	276190	5001.6	567780	531990	64	1	P10809
VIHDNFGIVEGLMTTVHAITATQK	2.6	46830000	49380000	6915400	89054000	12.88	3	P04406
MALDIEIATYR	2.4	2066100	4227900	1582500	1026500	4.12	1	P08670
KSAEFLLHMLK	3.5	2317300	361910	1427800	2234500	14.49	2	P18621
DDIVKTVIEPM(+15.99)ASEGLR	3.7	4725400	14784000	2465400	1652200	64	1	P20020
EITALAPSTMK	3.1	14940000	303570	28796000	8906700	64	1	P60709
VIISAPSADAPMFVMGVNHEK	2.1	8811100	9672700	9462100	6524800	1.48	2	P04406
AGFAGDDAPR	3.7	8169000	221720	13076000	1888400	64	1	P60709
DLTDYLMK	2.9	6480600	496810	11387000	4800600	22.92	1	P60709
AFTKPEEAC(+57.02)SFILSADFPALVVK	1.8	102660	201940	26906	181800	64	1	P22102
AVFVDLEPTVIDEVR	2.1	17807000	21255000	10655000	4174800	8.42	2	Q71U36
LVIITAGAR	4	1589300	262850	2084200	2447400	9.31	1	P00338
AVFPSIVGR	3.3	3129100	404840	2708100	8004600	19.77	1	P60709
IIAPPER	2.7	3759600	145220	8003000	4226100	55.11	1	P60709
FASFIDK	3.2	3688000	122460	7131900	934710	58.24	1	P05787
YIDQEELNK	3.6	1843500	49005	2888200	612630	64	1	P08238
SGVSLAALKK	3.6	8141000	65770	3461600	554780	64	2	P16403
LQSIGTENTEENRR	3.3	838860	62632	2553000	343360	40.76	2	P04075
LALDIEIATYR	2.3	11261000	29350000	11076000	2231600	13.15	1	P05787
GTIEILSDVQLIK	1.8	2172300	2822800	1017700	712100	5.81	1	P05388
SYELPDGQVITIGNER	2.4	38782000	47594000	46203000	15081000	3.16	2	P60709
EIQTAVR	2.9	11129000	58115	8528900	1597400	64	1	P06899
AGLQFPVGR	3.1	55792000	1913600	29524000	26536000	64	1	P16104
M(+42.01)EFQAVVMAVGGGSR	7.4	22634	55000	0	0	64	1	Q9NR50
ALAAAGYDVEK	3.3	8390200	68849	3460500	755080	64	1	P16403
SISISVAR	3.2	1413200	56628	3920300	1478200	64	1	P04264
IAGQVAAANK	1.1	710540	0	467770	131870	64	1	P39019
TPAQYDASELK	2.7	2822100	54082	2645800	467660	64	1	P07355
FTASAGIQVVGDDLTVTNPK	1.5	12949000	26848000	16641000	5165800	8.55	2	P06733
ALTGHLEEVVLALLK	2.6	2820000	2604400	287350	3123800	18.32	2	P04083
LGGSAVISLEGKPL	1.8	4804100	6805100	7324100	2929400	3.39	1	P23528
IALTDNALIAR	2.4	2508600	127020	901070	525020	64	1	P18124
ISEQFTAMFR	2.9	5506200	1173700	3651600	3638700	11.55	1	P07437
VVDLMAHMASKE	2.2	7897900	599170	18626000	3718400	31.09	2	P04406
TIGGGDDSFNTFFSETGAGK	2.3	11691000	10738000	6944200	3532800	7.23	2	Q71U36
GQTLVVQFTVK	2	1291900	2437500	1292600	953360	5.03	1	P27797
GHYTEGAELVDSVLDVVR	1.8	12352000	20227000	3683300	4937600	5.58	2	P07437
GGNFGFGDSR	2.6	2803000	33230	2309100	643510	64	1	P22626
C(+57.02)DSSPDSAEDVR	2.7	564000	19881	2165200	70872	64	1	P02765
DIC(+57.02)NDVLSLLEK	1.4	1375000	3977500	721740	800850	64	1	P63104
QDIAFAYQR	2.9	2244700	108120	3102800	711540	46.76	1	P07355
FNVWDTAGQEK	2.5	875980	62886	1175500	598830	26.5	1	P62826
ATENDIYNFFSPLNPVR	1.5	3293100	5869100	995440	1037700	5.9	2	P31943
MSVQPTVSLGGFEITPPVVLR	2.7	19122000	17054000	3084700	3527400	17.12	2	P06748
GGSGGSHGGGSGFGGESGGSYGGGEEASGSGGGYGGGSGK	4.5	413840	228950	1299300	127110	64	1	P35527
DSYVGDEAQSK	2.9	5018800	48849	7155700	422570	64	1	P60709
FLEQQNQVLQTK	3.3	5361100	602190	17025000	2619700	28.27	1	P04264
AEGSDVANAVLDGADC(+57.02)IMLSGETAKGDYPLEAVR	2	3303200	10067000	2278000	867400	64	2	P14618
EIIDLVLDR	2.7	1636000	1097900	1673600	1471300	2.1	1	Q71U36
TFFSFPAVVAPFK	2.4	322190	589150	84251	372630	6.99	1	P41250
QFTSSSSIK	3	486390	17733	1408600	96483	64	1	Q04695
GVVDSEDLPLNISR	4.6	6296200	2238500	8980000	4506800	4.23	2	P08238
MIVLGFSNPINWVR	4.4	107490	301710	27220	83587	17.31	1	Q8WWC4
QAQEYEALLNIK	2.8	5148400	950070	2983000	1445500	16.01	1	P05783
AQYEDIANR	4	4102000	44740	3123400	613670	64	1	P05787
SLLEGEGSSGGGGR	5.1	905850	20531	2832100	97416	64	1	P13645
LVTLPVSFAQLK	2	1194600	390770	212920	911080	15.33	1	Q96AG4
VHLVGIDIFTGK	3.3	4651500	5289000	2913700	4304600	2.09	2	P63241
NQKDPGVLDR	1.7	1012200	0	747140	104330	64	2	P31949
WSLLQQQK	3.3	5775500	198040	4965200	3212500	64	1	P05787
ITLPVDFVTADKFDENAK	2.3	5338100	10347000	4107900	2913000	3.55	2	P00558
GNLANVIR	2.3	1174100	0	929970	623500	64	1	P05141
STELLIR	3.1	19022000	147960	8699900	2261600	64	1	Q71DI3
YRPGTVALR	3.4	32002000	386590	8100400	19436000	64	2	Q71DI3
LMLLLEVISGER	2.7	506140	1343400	183050	407890	14.89	1	O43707
GGGGGGYGSGGSSYGSGGGSYGSGGGGGGGR	3.8	483720	90434	1503200	290930	29.87	2	P04264
VNFTVDQIR	3	1046000	111580	1709900	1004800	15.32	1	P13639
GVAPLWMR	1.7	535450	0	266920	472400	64	1	Q00325
LISQIVSSITASLR	2.3	35413000	27529000	4023100	91699000	22.79	2	Q9BQE3
AKFEELNMDLFR	3	1943000	1216300	833200	778190	6.35	2	P11021
TIAQDYGVLK	2.9	2781100	344160	7261800	1322900	21.1	1	Q06830
AMEAVAAQGK	13.2	27203	0	29329	51955	64	1	P18669
NQVAMNPTNTVFDAK	2.1	2394900	228510	3199900	2272400	16.97	1	P11142
SLDMDSIIAEVK	2.3	7689200	2948500	3871900	1400100	16.1	1	P05787
IGAEVYHNLK	2.8	3677600	322020	9308700	2621900	28.91	2	P06733
SGGGGGGGLGSGGSIR	3.1	896950	68605	2302300	1061100	33.56	1	P35527
GLFIIDPNGVIK	2.6	1150600	1096700	477980	438720	5.9	1	P30048
LTGMAFR	3.4	4017000	106080	9486100	2988400	64	1	P04406
THYQADIER	13.6	39970	0	113510	0	64	1	O95573
VGGTSDVEVNEK	3	1115700	20933	1608300	92576	64	1	P10809
DAGTIAGLNVLR	2.2	2556100	556960	3345800	2176400	7.44	1	P11142
EYGGLDVLVNNAGIAFK	3.1	258870	681340	145210	106280	6.64	1	P16152
AMGIMNSFVNDIFER	2.6	105800000	43104000	10386000	12745000	34.37	2	P06899
LGIHEDSTNR	2.7	877340	14298	1782900	311330	64	2	P08238
AALEDTLAETEAR	3.8	3681300	476260	10516000	858620	22.08	1	P08727
IMQDFESDTFFPEIDLEK	1.3	44114	139580	36871	0	64	1	P00374
ILVVNAAYFVGK	2.1	537110	1112600	730450	305410	64	1	P36952
GLLLFMDEADAFLR	2	118990	311670	59871	49838	6.25	1	Q5T9A4
M(+15.99)(+42.01)ELITILEK	2.8	325200	1197600	103160	0	64	1	Q14974
LSYNTASNK	2.3	356810	0	242470	116000	64	1	P49207
IGGIGTVPVGR	1.9	10700000	712060	16921000	7227400	25.19	1	P68104
SAYGGPVGAGIR	3.2	1340600	103900	3009600	222180	28.97	1	P08729
DAGQISGLNVLR	2.8	1060400	139490	1115800	529180	17.61	1	P38646
IVADKDYSVTANSK	6.3	1009200	70806	1929000	621360	27.24	2	P07195
KLNVTEQEK	2.5	565930	13857	1895000	219050	64	1	P06733
LEVQATDREENKQIALGTSK	2.7	430420	124970	840920	356020	6.73	1	P11387
IGFPWSEIR	3.3	1404100	1295400	1422900	961180	2.02	1	P26038
IGEHTPSALAIMENANVLAR	3.1	6160400	11665000	5458000	3163600	3.69	2	P04075
GVMLAVDAVIAELKK	1.8	4951400	8557500	1765900	1761900	4.86	2	P10809
MPSLPSYK	3.1	973090	78122	2643200	515880	33.83	1	P29401
FDGALNVDLTEFQTNLVPYPR	2.3	12606000	30786000	3540100	4598800	8.7	2	Q71U36
LASLMNLGMSSSLNQQGAHSALSSASTSSHNLQSIFNIGSR	1.9	1977400	0	0	4173100	64	1	P43243
KVPQVSTPTLVEVSR	1.5	113690000	47291000	368940000	38429000	64	2	P02768
SKAEAESLYQSK	4.9	929110	74162	3177900	243150	42.85	2	P04264
HIADLAGNSEVILPVPAFNVINGGSHAGNK	1.9	12447000	33034000	5442600	6495500	6.86	2	P06733
NAGVEGSLIVEK	2.4	2872700	605160	4912700	391730	14.25	1	P10809
SIQLDGLVWGASK	2.8	546120	434930	597830	427620	1.69	1	P29692
YIDENQDR	5.4	180720	0	25983	47281	64	1	Q96KP4
LSVDYGK	1.6	490270	0	629540	539810	64	1	Q71U36
AQYDELAR	2.2	2852400	23993	1868700	362260	64	1	P05783
EGAAAAPPPER	7	154560	52731	159260	334830	6.35	1	Q7Z2K6
RVHPVSTMIK	1.8	752230	6166.6	510420	1693800	64	2	P00338
INISEGNC(+57.02)PER	11.2	203340	15478	515180	237790	33.29	1	Q15365
GFEVVYMTEPIDEYC(+57.02)VQQLK	1.7	1098700	2633700	682920	1078300	64	2	P08238
ASFNNPDR	7.7	44734	0	85972	13457	64	1	P54727
DVPVAEEVSALFAGELNPVAPK	11.4	852130	2745600	432360	102630	26.75	2	O14617
HGIPMSHVAR	0.9	37702	0	29656	52462	64	1	P24666
VALAGLLGFGLGK	2.7	50021	70991	0	102190	64	1	Q56VL3
TPC(+57.02)NAGTFSQPEK	0.1	27121	0	73205	35277	64	1	O43684
LSDGVAVLK	2.9	1933900	58428	3439800	403080	64	1	P10809
WALSQSNPSALR	3.1	619430	154190	1330400	318130	8.63	1	P55072
NVSTGDVNVEMNAAPGVDLTQLLNNMR	1.8	2327500	5479400	2875900	804080	36.39	1	P13645
GALQNIIPASTGAAK	2.8	18612000	3859800	36745000	17016000	9.52	2	P04406
EQVANSAFVER	3	1461400	42734	3048000	856110	64	1	P08238
YPIEHGIITNWDDMEK	3.1	15224000	8299600	13503000	7794100	4.02	2	P68133
NLDLDSIIAEVK	0.8	2137400	4958800	3013100	423230	32.08	1	P35908
ELASQPDVDGFLVGGASLKPEFVDIINAK	2.3	4021800	11123000	1528000	1864200	7.28	1	P60174
S(+42.01)DAAVDTSSEITTK	2.8	2160300	133680	6162200	586420	46.1	1	P06454
FWEVISDEHGIDPTGTYHGDSDLQLDR	2	8884000	5094800	1109900	2129400	24.51	2	P07437
IRIDSLSAQLSQLQK	2.9	1637700	1484900	867610	1585100	3.01	2	P02545
VQQTVQDLFGR	2.8	1106300	146490	1228300	605390	16.69	1	P38646
SALSGHLETVILGLLK	3.1	13895000	11885000	1014100	23408000	23.08	2	P07355
ALGQNPTNAEVLK	3.1	883130	90620	2523100	394360	27.84	1	P60660
KGISDLVLK	13.2	88649	108750	0	182330	64	1	P28288
NAFGLHLIDFMSEILK	0.5	82264	270930	30804	16442	24.91	1	Q15003
LVAIVDVIDQNR	2.7	3181200	582280	837500	621620	18.35	1	P50914
SVLDAAQIVGLNC(+57.02)LR	1.5	73172	165360	58877	68449	64	1	Q92598
QTVAVGVIK	2.9	3445600	82354	6169400	2564600	64	1	P68104
NLDIERPTYTNLNR	2.3	8759300	1961300	6655600	3922200	11.47	2	Q71U36
VNPTVFFDIAVDGEPLGR	1.6	8575400	23244000	3663600	2556500	9.09	2	P62937
VMLGETNPADSKPGTIR	3.3	3057900	418480	6579800	1985800	15.72	2	P22392
EVAAFAQFGSDLDAATQQLLSR	1.5	1485100	3890200	642770	350800	11.09	2	P25705
VGWEQLLTTIAR	2.1	2137200	4092800	1543500	1465800	2.83	1	O43707
NVSTGDVNVEM(+15.99)NAAPGVDLTQLLNNMR	2	1742900	5629200	1060800	255400	64	1	P13645
IVFVPGC(+57.02)SIPLTIVK	1.3	161300	299260	72196	273740	64	1	P54136
GVMLAVDAVIAELK	3.3	526150	1393700	226420	181600	7.67	2	P10809
VETGVLKPGMVVTFAPVNVTTEVK	1.6	32175000	50474000	18704000	12973000	3.89	3	P68104
IGIEIIK	2.8	519140	0	792770	452400	64	1	P10809
SLYASSPGGVYATR	3.3	2877200	362260	4712200	1255600	14.3	1	P08670
LQATEVR	3.5	483500	58115	168380	1597400	27.49	1	Q9UI30
LLGWIQNK	7	690470	63060	850890	1508300	23.92	1	P21333
YNGLIHR	2.3	242190	0	174970	95565	64	1	P46779
LMEDLDR	2.2	2096000	46246	6512700	772930	64	1	P06703
SQDAEVGDGTTSVTLLAAEFLK	2.7	1071400	2745600	432360	316430	8.68	2	Q99832
ILGLLDAYLK	2.2	1314300	1831400	781750	1957300	2.85	1	P26641
LGVNNISGIEEVNMFTNQGTVIHFNNPK	2.3	1002000	1928000	286560	476390	6.73	1	P20290
TATESFASDPILYRPVAVALDTK	2.2	12260000	33618000	8817400	3642500	11.35	2	P14618
LATQSNEITIPVTFESR	2.5	2630900	2177300	2052100	514730	11.23	2	P04792
TNQELQEINR	4.1	2613100	44721	2571400	309360	64	1	P07355
VMVQPINLIFR	2	1274000	638810	377470	1942900	5.66	1	P62304
GILGYTEHQVVSSDFNSDTHSSTFDAGAGIALNDHFVK	1.9	16754000	25213000	3685300	9001700	7.9	3	P04406
LQALKDTANR	2	102590	0	192140	52693	64	2	P29401
VFIGNLNTLVVK	2	3210900	718920	744500	2399100	12.49	1	P07910
EHMGNVVEALIALTN	2.8	139810	311670	59871	49838	6.25	1	Q9NX55
LSVDYGKK	3.5	1690700	10381	1867600	212670	64	2	Q71U36
TDEAAFQK	2.2	215570	0	411760	34034	64	1	P26447
QITVNDLPVGR	3.1	4952900	1151300	13243000	2731300	11.5	1	Q06830
TIVEEVQDGK	3.3	1141100	46788	3816200	66978	64	1	Q04695
HINDSAPEVR	12.2	176420	24548	168890	484500	19.74	1	Q14008
AQFIGPLVFGGMNLTR	6.1	169660	421030	43061	214550	64	1	Q9H2J4
IDFYFDENPYFENK	2.3	1886400	3582400	1119000	756320	4.74	1	Q01105
VQTPEVDVK	9.9	148320	22361	380010	84537	16.99	1	Q09666
PSIVGRPR	3.2	4625200	666670	3029700	12877000	19.31	1	P60709
ILMEHIHK	2.7	749590	0	136650	138950	64	2	P84098
ESYVETELIFALAK	1.5	363330	829560	193720	119420	6.95	1	Q00610
C(+57.02)LDEETSR	3.5	64415	29825	0	166800	64	1	Q15149
SC(+57.02)C(+57.02)SC(+57.02)C(+57.02)PVGC(+57.02)AK	0.7	71004	0	253470	30544	64	1	P02795
SRAEAESMYQIK	3.3	2942000	31236	1256400	346160	64	2	P05787
RREEEMMIR	6.7	2645500	496930	6965400	2369700	14.02	1	P23246
HELQANC(+57.02)YEEVKDR	1.9	347730	73434	909770	407720	64	3	P23528
ARFEELNADLFR	3.1	2871200	2575100	2370600	1619500	3.04	2	P11142
AADTIGYPVMIR	3.3	1084200	134520	628490	380180	23.74	1	P31327
IQDVGLVPMGGVMSGAVPAAAAQEAVEEDIPIAK	2.2	883780	1067500	302130	92099	22.51	1	P52815
FIIPNVVK	2.3	1962000	226880	1507300	3206200	14.13	1	P00338
VLLESEQFLTELTR	2.2	744580	601290	162320	167320	12.61	1	P37108
VGGTSDVEVNEKK	6.5	591190	42814	584630	279140	34.06	2	P10809
KESYSVYVYK	6.2	8357100	274870	7530700	3512300	64	2	P57053
VLTPTQVK	1.9	198820	0	490870	116450	64	1	P30086
AAANEQLTR	1.9	37384	0	67282	58739	64	1	Q9NX63
ISTVVSSK	1.5	93744	0	96702	27265	64	1	P37108
SLVSVTK	2.7	526390	6664.2	996330	459900	64	1	P08238
NIILEEGKEILVGDVGQTVDDPYATFVK	1.4	9432200	26777000	3670200	2938900	9.11	2	P23528
FRTEAAAAAPQR	3.3	29878	0	50010	61753	64	1	O95817
RALANSLAC(+57.02)QGK	3.3	29878	0	50010	61753	64	1	P04075
YSQSDLEQTK	11.5	84702	0	183490	113590	64	1	Q14683
YVEC(+57.02)SALTQK	11.5	84702	0	183490	113590	64	1	P60953
ISLPLPNFSSLNLR	2.4	17093000	24452000	3572900	26870000	7.52	2	P08670
ASINMLR	6.1	2127200	44704	5449100	851420	64	1	P18124
ITESEEVVSR	2.9	642090	12760	841800	110890	64	1	P02545
A(+42.01)TDSWALAVDEQEAAAESLSNLHLKEEK	4.5	3578000	11607000	1816000	785740	64	1	Q9UMR2
A(+42.01)DKPDMGEIASFDK	2.2	2973800	739470	5730800	1485400	7.75	1	P63313
QLETLGQEK	3.2	2100700	31978	2564300	251470	64	1	P05787
GLTSVINQK	3	1306500	45575	3035400	1083900	64	1	P07195
LPLQDVYK	2.9	3813200	230980	4833300	2931700	31.42	1	P68104
ETPAATEAPSSTPK	2.9	2007600	29639	2097000	134710	64	1	P80723
GC(+57.02)IVDANLSVLNLVIVK	1.5	181970	377590	38387	276720	10.74	1	P62753
S(+42.01)ETAPAAPAAPAPAEK	2.3	4550000	175850	3117600	367110	64	1	P10412
A(+42.01)DDLDFETGDAGASATFPMQC(+57.02)SALR	1.7	1696600	4422300	1454700	909320	64	2	P63241
RLLEDGEDFNLGDALDSSNSMQTIQK	2.6	2478000	1351700	347290	369470	22.59	1	P05783
VKLEAEIATYR	3.1	4033900	1127500	2850800	1147100	9.77	2	P05783
NDFQLIGIQDGYLSLLQDSGEVR	3.8	852440	1997100	190420	424230	10.49	2	P63241
IIGATDSSGELMFLMK	2.3	1575600	641400	469180	528940	9.94	1	Q13185
MFVLDEADEMLSR	1.5	1326800	1129800	977310	680910	3.7	1	P60842
RGILTLK	3.4	8765700	151390	6961400	20372000	64	1	P60709
LFVTNDAATILR	1.9	432980	194040	443200	489950	3.12	1	P50990
YEEHLKR	11.9	73212	18809	86558	97075	5.16	1	P84090
VPDVQDGVR	8.2	115190	17733	139540	96483	11.67	1	Q15149
GGIVSQVK	1.9	60103	0	133060	52708	64	1	P22314
LQIWDTAGQER	11.2	637280	269970	597820	541800	4.22	1	P61106
VLLPEYGGTK	2.2	2267500	0	4594600	537950	64	1	P61604
AAVATFLQSVQVPEFTPK	2.1	1390900	3421400	864200	700180	5.92	2	P22314
VAVLGASGGIGQPLSLLLK	2.1	4769500	10924000	1588700	3343700	6.88	2	P40926
EKLC(+57.02)YVALDFEQEMATAASSSSLEK	1.9	2042400	5701600	1345100	1122900	64	1	P60709
DLLIAYYDVDYEK	2.1	782310	1494700	775840	184890	8.08	1	P30101
SQSSDLLER	3.7	376400	17765	1127700	198700	63.48	1	Q8IVT2
NADMQEELIASLEEQLK	12.7	158590	465570	135450	0	64	1	Q7Z3K3
NLATTVTEEILEK	9.6	2173200	2882600	2478700	177920	17.72	1	O43390
EMEENFAVEAANYQDTIGR	2.7	2995800	2175100	3021800	606980	10.18	2	P08670
NSLESYAFNMK	3.1	1413300	243640	1848000	1388500	8.92	1	P11142
GILAADESTGSIAK	3.2	2124900	205920	5447500	966440	26.45	1	P04075
YILNVTPNLPNFFEK	15.9	171540	301630	0	329960	64	1	Q99956
VDALNDEINFLR	2.5	1879000	1706600	2420800	240400	13.1	1	P08729
VPAPVTMDSFFFGC(+57.02)ELSGHTR	1.7	55153	109170	23618	87822	64	1	O75607
SLNILTAFQK	2.3	432400	259340	312670	377780	3.01	1	P30040
GLLLFVDEADAFLR	8.2	197810	212780	44515	421920	9.48	1	Q9NVI7
TLVLSNLSYSATEETLQEVFEK	1.9	5675800	6543500	858300	1061700	16.59	2	P19338
QGANINEIR	4.6	251170	22361	380010	84537	23.16	1	Q15365
ATAVMPDGQFK	3.4	1735600	72243	4751700	1044000	64	1	Q06830
LQDAEIAR	3	2491100	92428	6443400	360590	64	1	P06703
RSDNVVTSELLAVMDGDWTLK	8.6	382480	1054900	232550	197450	23.43	1	Q9P2B2
SEIDLFNIR	3.3	366240	315640	742170	235650	4.33	1	P08758
TEFLSFMNTELAAFTK	2.6	5006000	4838400	740920	1873500	16.97	2	P31949
FDSDAASPR	1.5	194530	0	391880	9794.7	64	1	P01889
STMQELNSR	2.5	617360	17252	1918800	404470	64	1	P35527
EAVLLLK	2.5	649080	0	792770	452400	64	1	P36578
ALLFIPR	2.6	1499900	345290	1126400	3630200	10.51	1	P08238
TFIAIKPDGVQR	2.7	2708100	505100	6018200	2103600	11.91	2	P22392
VAGMDVELTVEER	2.6	844760	1232100	1412000	242640	5.82	1	P62258
YYGYTGAFR	3	3034300	658470	10010000	1369500	64	1	P02788
IWHHTFYNELR	3.3	12835000	2808500	10537000	16950000	7.49	3	P60709
QEYDESGPSIVHR	3.1	3782200	318230	6511400	3602100	20.46	2	P60709
KEDLVFIFWAPESAPLK	2.8	1029700	1357700	296460	1550100	5.23	2	P23528
VLTEIIASR	2	777540	92238	1904700	317030	20.65	1	P08758
KFGYVDFESAEDLEK	3	1318500	680800	748830	308340	11.47	2	P19338
QVVESAYEVIK	2.5	1267800	134400	1967700	1320400	14.64	1	P00338
ASGPGLNTTGVPASLPVEFTIDAK	2.1	2444000	7043100	1918300	444600	19.04	2	P21333
QAFPNTNR	1.4	267960	0	521270	234310	64	1	P26641
WVDPNSPVLLEDPVLC(+57.02)ALAK	10	568820	1874500	361710	0	64	2	P42330
NTSELVSSEVYLLSALAALQK	10	568820	1874500	361710	0	64	2	Q9H583
LASDLLEWIR	1.5	687910	1135500	480570	716250	2.71	1	O43707
VPTANVSVVDLTC(+57.02)R	1.6	10823000	5150500	25579000	11736000	30.98	2	P04406
KAYGQALAK	9.7	320010	5664.2	784600	277160	64	2	P29401
LEQLGAQR	1.9	147950	0	310440	42119	64	1	P16435
KDLYANTVLSGGTTMYPGIADR	2.1	6433400	7899700	6844800	7550400	2.3	2	P60709
VREYELR	2.2	365730	0	235430	40011	64	2	P62913
DRPFFPGLVK	2.8	1427400	901740	1948300	1459000	2.16	2	P22392
HSEAATAQREEWK	2.6	294930	0	196510	18648	64	2	Q14103
EHVIEALRR	5.2	836300	3803.5	1025100	134750	64	2	P27635
ESGLISTK	1.3	77029	0	159890	45197	64	1	Q9NWT1
VTGSLETK	1.3	77029	0	159890	45197	64	1	P21796
TEMENEFVLIK	2.9	1430800	242690	1167300	712330	14.84	1	P05787
ALIAGGGAPEIELALR	1.9	366210	457190	215170	269710	2.43	1	P50991
VLIAAHGNSLR	2.5	562930	44067	1081600	576730	24.54	2	P18669
TEISEMNR	1.5	488460	9115.2	437240	70441	64	1	P05787
ISVYYNEATGGK	2.3	4816500	69665	4518900	1616100	64	1	P07437
NLQNLLILTAIK	2.1	295460	226250	41099	420370	12.02	1	Q00610
HLTGEFEK	3.1	233030	4385.3	216310	113150	64	1	P62826
LNTLLQR	2.9	873660	0	452550	534360	64	1	Q00839
AGGPTTPLSPTR	3.5	2260000	586590	418230	7404800	17.71	1	P20700
AEQPDGLILGMGGQTALNC(+57.02)GVELFK	7.6	198570	299970	31481	212820	9.53	1	P31327
ILEFFGLK	2.3	550110	614060	415130	650010	1.57	1	P07237
QVPNESFFNFFNPLK	2.7	195420	475270	49431	63692	9.61	1	Q99733
RLSYNTASNK	1.6	83050	0	163840	146690	64	1	P49207
MINTDLSR	13	1092100	41889	559020	370660	64	1	P36578
GDPVNYILQVLVGR	10.3	285260	528100	57608	548440	64	1	Q53EP0
GLYGIKDDVFLSVPC(+57.02)ILGQNGISDLVK	12.2	1101000	1430200	121020	2839500	64	1	P00338
DNIQGITKPAIR	2.6	55044000	453600	29197000	10686000	64	2	P62805
AIIIFVPVPQLK	1.7	1400600	1110000	176850	1242300	17.38	1	P62081
KIMSSPLSK	3.2	398990	18883	305270	387860	46.81	1	P61254
HAIPIIK	8.6	245500	232750	0	18050	64	1	O00571
ATPLSSTVTLSMSADVPLVVEYK	1.8	1050700	2645200	767400	582750	12.76	2	P12004
SLNNQFASFIDK	1.9	2843700	2004600	7328700	1623300	17.52	1	P04264
KASGPPVSELITK	2.5	11813000	456510	7462200	2069800	64	2	P16403
LGEIVTTIPTIGFNVETVEYK	2.7	709480	1607000	280640	481850	5.73	2	P84077
VGEFSGANK	3.5	649200	13861	1859700	272090	64	1	P10599
IGLFGGAGVGK	2.5	925950	107310	1031400	1173600	12.97	1	P06576
NELESYAYSLK	3.6	1383600	269970	1537100	541800	11.8	1	P11021
DATNVGDEGGFAPNILENKEGLELLK	1.9	18152000	56275000	8622300	2014500	27.93	2	P06733
VFLENVIR	2.9	46448000	1295900	8625100	6635300	64	1	P62805
DSYVGDEAQSKR	3	3218200	70502	8160300	148570	64	2	P60709
TSIEDQDELSSLLQVPLVAGTVNR	2.1	979470	2270700	303700	240230	9.45	2	P56537
DFLAGGIAAAISK	1.7	1004100	398570	392580	457610	7.05	1	P12236
TSFFQALGITTK	2.2	2322100	925790	709850	2847700	6.77	1	P05388
AYVVLGQFLVLK	1.6	1374300	1197400	198240	3802500	19.18	1	O75531
TLMNLGGLAVAR	3.4	1349400	504070	1961600	2166400	4.3	1	P37802
IIQLLDDYPK	2.6	1887500	113070	498310	478980	57.13	1	P05388
TYSLGSALRPSTSR	1.9	1722900	169290	2196300	2354600	13.91	1	P08670
VERADGYEPPVQESV	3.2	392880	85557	0	947640	64	1	P61247
PYQYPALTPEQK	2.3	1327500	279190	3191500	1105900	11.43	1	P04075
ILGADTSVDLEETGR	2.8	1288800	655240	2238600	265680	8.43	1	P25705
NLPLHELITPEFISTFIK	7	1042700	2891800	445160	723660	26.2	2	O75818
LVINGNPITIFQERDPSK	2.9	10889000	17497000	8219800	10560000	2.4	2	P04406
TWNDPSVQQDIK	2.2	1680000	70902	1779700	364690	63.53	1	P11021
LDADPSLQR	6.1	632010	22361	1344800	84537	60.14	1	P08729
IIQENLNLALNSASAIGC(+57.02)HVVNIGAEDLR	0.2	130910	463830	59816	0	64	1	P13797
AYDIAGSTK	10.4	134100	0	251290	62765	64	1	P11388
MYEEHLKR	2.4	308140	0	157520	27851	64	2	P84090
VSFELFADKVPK	2.2	9484200	4725400	10954000	7283300	3.17	2	P62937
IVNSAQTGSFK	2.9	138670	6569.2	149830	32321	55.71	1	O75964
LHFFMPGFAPLTSR	2	26708000	7951500	2034900	62868000	30.9	2	P07437
FMLVLASNQPEQFDWAINDR	1.2	108290	245010	29447	109680	8.32	1	Q9NVI7
TPLFDQIIDMLR	7.1	333560	1039700	165170	0	64	1	P54886
IAQDLEMYGINYFEIK	2.4	350490	763240	196240	168540	4.53	1	P15311
FKGTESISK	2.3	43086	0	44609	0	64	1	Q00688
AQLGGPEAAK	1.8	609530	0	773820	51278	64	1	P04792
FSPLTTNLINLLAENGR	2.2	645630	1206200	160450	499940	7.52	2	P48047
ASLENSLR	3.2	2464300	19153	1597200	570310	64	1	P05783
S(+42.01)LPLNPKPFLNGLTGKPVMVK	2.5	2209100	1770200	342700	6187300	18.05	1	P62306
STHGPGMAMNWPQFEEWSLDTQR	1.7	384360	741380	245840	148860	4.98	1	Q9UKS6
GAYIYNALIEFIR	3.1	348190	577500	57608	575120	10.02	2	P26639
TITLEVEPSDTIENVK	6.2	4387400	2489600	4916000	1721600	4.89	2	P62979
VADNSFDAK	1.9	93086	0	61096	9300.5	64	1	Q14978
VQESADELQK	12.9	53612	0	78698	28770	64	1	P84085
VAPAPAVVK	1.9	687420	0	399310	122160	64	1	P62424
LGQHVPTLHPTSEELTIAGMTFTTFDLGGHEQAR	0.2	137280	0	0	40603	64	1	Q9NR31
ALEESNYELEGK	3.7	2464100	109480	9235200	130150	64	1	P13645
VGYTPDWIFLLR	12	98402	164740	18430	52980	8.94	1	Q00610
KPAAGLSAAPVPTAPAAGAPLMDFGNDFVPPAPR	2.2	1816700	2453500	590300	272020	14.52	2	Q9NQC3
EMTLDEWK	2.2	406140	0	207760	32632	64	1	Q8NC51
QLLTLSSELSQAR	3	374650	288960	637610	342370	2.78	1	P15311
FGGSGSQVDSAR	2.9	55017	0	63781	21769	64	1	Q13200
ILSISADIETIGEILKK	1.9	3821900	9470300	934870	1173200	10.13	2	P61978
KGSITSVQAIYVPADDLTDPAPATTFAHLDATTVLSR	1.4	2428600	4848700	621590	549720	8.82	2	P06576
AKEIGFSDK	7.6	341020	99993	396020	391870	4.76	2	P31327
DNSTMGYMMAK	1.4	843170	0	1121900	576540	64	1	P08238
LATQLTGPVMPVR	2.8	2547400	229040	1051500	673750	35.96	1	P26373
IFIGTFK	2.7	265850	0	106870	367460	64	1	P63162
DVDEAYMNKVELESR	3.1	4716600	425850	4359900	573520	31.72	2	P05787
TIDDLKNQILNLTTDNANILLQIDNAR	1.9	2727300	8490500	1658100	742310	64	2	P13645
LGGNEIVSFLK	8.8	148190	0	86039	154240	64	1	O60762
IREEYPDR	3.1	3318000	34366	3250800	328020	64	2	P07437
TLTLVDTGIGMTK	2.3	3821000	336670	4297500	3639400	20.82	1	P08238
TLVSVTK	3.6	453290	1984	628990	485920	64	1	P07900
VLGILAMIDEGETDWK	1.8	212280	378740	101870	276780	4.13	2	Q15181
LAPDYDALDVANK	2.6	3290700	136730	1888800	425220	64	1	P62750
SNVSDAVAQSTR	3.4	864770	30270	2258100	518230	64	1	P60174
LDNNWGREER	2.7	235230	15478	515180	237790	33.29	1	P17931
ADEGISFR	4	1528200	53959	4551500	360370	64	1	Q06830
KIESFGSK	2.2	26712	0	66079	40770	64	1	P30405
LSLEGDHSTPPSAYGSVK	2.4	5294100	708230	4432200	1719300	20.21	2	P07355
ALLFVPR	2.1	970960	104540	799630	1869600	17.88	1	P07900
FTPGTFTNQIQAAFREPR	8.8	2737800	3562000	1197300	1476800	3.94	2	P08865
EESGKPGAHVTVK	2.1	326240	10732	888250	335200	64	3	P22626
ADLINNLGTIAK	2.3	4808600	880260	5118000	4703200	9.69	1	P08238
SLDTHVTK	10	63951	0	25020	71254	64	1	Q14166
LVLEVAQHLGESTVR	3.1	2741400	3159200	3115400	868700	4.4	2	P06576
QLFHPEQLITGK	2.4	2678600	983540	3101900	3098900	3.59	2	Q71U36
YSGGNYRDNYDN	1.4	110010	0	104560	19079	64	1	P98179
LVAEVSLQNPLPVALEGC(+57.02)TFTVEGAGLTEEQK	1.4	230620	853380	69114	0	64	1	P21980
MVVPAALK	0.9	790300	0	0	209300	64	1	P40429
VTLTSEEEAR	2.8	1531100	51108	2864900	283870	57.22	1	P00338
KVEDMMK	10.6	121370	53513	253100	126970	4.88	1	P13639
AQGPAASAEEPKPVEAPAANSDQTVTVKE	2.4	5239700	3026600	5468100	520710	22.94	2	P80723
IITLTGPTNAIFK	1.8	1279000	761470	528140	1645400	4.13	1	Q15365
ENMTLQPK	2.3	160760	4385.3	216310	113150	64	1	P11388
LALDVEIATYR	5.6	994420	2241000	1407000	306580	64	1	P35908
FLESVEGNQNYPLLLLTLLEK	7.5	15480	49224	0	0	64	1	P55060
EAATQAQQTLGSTIDKATGILLYGLASR	2	135670	376480	38846	76485	9.69	1	P47897
STAGDTHLGGEDFDNR	3.2	1888300	111050	2339400	398150	42.36	2	P11142
QLFALSC(+57.02)TAEEQGVLPDDLSGVIR	2.6	147210	265080	31481	42263	8.42	1	P04899
FLNAENAQK	10.4	194680	17765	302720	114530	19.35	1	P43487
TFVNITPAEVGVLVGK	2.2	13554000	36717000	10202000	3892400	10.78	2	P07737
LYDKIDPEK	8.9	816330	40618	1665200	1371100	41	1	O14561
S(+42.01)TVHEILC(+57.02)K	2.3	1252100	126810	3181300	1498400	25.09	1	P07355
AIPQLQGYLR	2.4	2780800	341710	1153700	1168100	24.76	1	Q02878
VGSAADIPINISETDLSLLTATVVPPSGR	0.6	2160500	7690700	724870	0	64	1	P21333
VQALEEANNDLENKIQDWYDK	1.6	156210	494880	129970	0	64	1	P35527
LVTDLTK	3.2	25539000	845610	91740000	9389800	64	1	P02768
A(+42.01)ALAPLPPLPAQFK	2.9	282390	619840	137670	46185	13.42	1	Q9NP79
TKFETEQALR	3.2	1333900	71821	2639500	114880	36.75	2	Q04695
SNMDNMFESYINNLR	2.4	1947300	1489200	678300	1097100	6.67	2	P05787
EFHLNESGDPSSK	3.4	1181600	34162	1457300	215720	64	2	Q01105
FTQAGSEVSALLGR	3.9	1466700	1107900	1936100	704110	3.01	2	P06576
LYGKPIR	0.9	23244	0	0	44238	64	1	Q15427
S(+42.01)DKPDMAEIEKFDK	2.6	4766200	1861400	10251000	1418400	7.23	2	P62328
PVSSAASVYAGAGGSGSR	3.3	3606500	139990	2751700	1219400	64	2	P05783
VLLGVGDPK	3	1097500	65718	3767600	153040	57.33	1	O00567
LFNHLSAVSESIQALGWVAMAPKPGPYVK	0.1	455010	0	0	1614900	64	2	Q01518
YRDQIPSPGLMVFPKPVTALEYTFSR	1.3	6409100	19528000	3326300	1987300	24.59	2	P54709
LSFQHDPETSVLVLR	1.5	843880	985830	988110	338780	3.14	2	Q14697
LIALLEVLSQK	2.1	1255000	1617700	222660	2764000	12.41	1	P21333
ILLAELEQLKGQGK	2.2	4701300	4898100	3118900	2060200	4.24	2	P08670
ILLAELEQLK	1.9	1564700	1910600	1130900	695570	3.63	1	P08670
A(+42.01)AVLQQVLER	3.5	180570	292560	94972	71294	4.1	1	P12270
VGQDPVLR	1.9	312990	0	309560	87171	64	1	Q04837
LTTASQTNIK	5.7	63228	0	40274	66340	64	1	Q9UMY1
MIYASSK	2.6	378790	3246	1104500	407440	64	1	P23528
LGRPAANTK	2.2	102790	3474.6	268600	85223	64	1	P62241
GYKIPVIENLGATLDQFDAIDFSDNEIR	3.4	97382	186060	0	106120	64	1	P09661
YETELAMR	2.3	306060	0	190430	23227	64	1	P05783
VAQGVSGAVQDK	1.5	134250	0	237370	68710	64	1	P12268
YDGIILPGK	3.1	1445300	230980	640760	368110	19.66	1	P62913
VILDLTPNYR	2.7	1284500	250930	861170	409630	14.41	1	P08195
NQGGYGGSSSSSSYGSGR	3.2	1694200	16180	898670	295560	64	1	P09651
RVAAMSVAQR	11.2	141230	13857	261520	133600	18.87	2	O43143
KLPIDVTEGEVISLGLPFGK	2.3	2187800	2891800	445160	723660	10.54	2	P26599
DVNAAIATIK	2.9	3097400	78182	3979600	1386300	64	1	Q71U36
NTNPNFVR	10.5	186330	18957	274430	389450	20.54	1	P35579
TNQIGTVNDR	19.5	86153	46788	195140	66978	5.46	1	P53990
SSGLPNIPVQTISR	2.7	1639200	151540	517960	232490	37.32	1	P02786
IIYGGSVTGATC(+57.02)K	1.5	1239100	78589	3655400	1222300	64	1	P60174
VDLLNQEIEFLK	2.8	1444400	2882600	2478700	248020	17.11	1	P35908
TTGFGMIYDSLDYAK	2.5	1676800	454880	364380	245540	22.98	1	P62847
HTGPNSPDTANDGFVR	3.6	1214000	38137	804490	240460	64	2	P31943
TSLEVPEINALLLVPK	2.8	69154	121500	15432	107330	7.87	1	Q86W42
A(+42.01)DDLDFETGDAGASATFPMQC(+57.02)SALRK	1.6	376460	1006400	499480	0	64	1	P63241
QQYESVAAK	3.2	837330	6792.8	1388500	127670	64	1	P08670
ASNGDAWVEAHGK	2.2	274700	0	187100	61549	64	2	P38646
LSSARPGGLGSSSLYGLGASRPR	2.1	2386300	1658100	2328100	3163700	1.91	3	P08729
DLYANTVLSGGTTM(+15.99)YPGIADR	1.5	10970000	35527000	6385200	1007300	37.03	2	P60709
SGETEDTFIADLVVGLC(+57.02)TGQIK	10.8	8184800	28721000	4004000	0	64	2	P06733
TSIAIDTIINQK	2.1	908730	550210	1427800	416300	3.43	1	P25705
APGPLSK	2.5	25824	0	77325	25973	64	1	Q13263
VHPVSTMIK	3	648650	18873	1054600	432250	57.69	2	P00338
GDLGIEIPAEK	2.3	1976100	314650	5321400	726820	16.91	1	P14618
QMFGNADMNTFPTFK	1.6	185840	102060	167640	83419	4.68	1	P18859
LTPTHYLTK	7.8	318390	0	773770	92704	64	1	P04844
VTGEVLDILTR	2.8	1221000	504070	1961600	2166400	8.6	1	O75955
GRPLAEESEQER	3.1	46029	0	27189	9546.2	64	2	Q8N357
IGASFLQR	1.9	228520	0	279880	239840	64	1	P00505
VKYETELAMR	3.2	3825200	50563	2795600	750940	64	2	P05783
ERGPYVYR	5.5	77836	0	191080	37322	64	1	Q8WTV0
FYEAFSK	2.3	859060	46246	1564800	772930	33.84	1	P08238
NFSDNQLQEGK	2.7	606160	31629	1780800	181400	56.3	1	P37802
GQNDLMGTAEDFADQFLR	2.3	552270	1201200	201510	223570	5.96	2	O15260
ALESPERPFLAILGGAK	2.4	5875900	12604000	3335000	4185800	3.78	2	P00558
ILNDVQDRFEVNVAELPEEIDISTYIEQSR	11.6	81353	231620	25129	68662	64	1	O00148
VLAQNSGFDLQETLVK	1.6	573980	471660	561520	439830	1.87	2	P40227
KAVLVALK	0.7	29452	0	53473	64333	64	1	P26640
TLNETELTELQSQISDTSVVLSMDNSR	1.3	2342000	7329000	1031100	187720	39.04	1	P08729
LLQDSVDFSLADAINTEFK	2.4	6631700	16410000	3440000	1662800	9.87	2	P08670
GFGFVTFDDHDPVDKIVLQK	2.6	7617800	4911200	950440	1237700	24.59	3	P22626
LLGGVTIAQGGVLPNIQAVLLPK	2.8	1965400	3484000	414600	0	64	2	P16104
HTLTQIK	3.1	42136	0	94977	73568	64	1	P40227
FGDPEC(+57.02)QVILPLLK	1.8	90564	165360	58877	138020	64	1	P22102
YFDPANGK	9.3	266110	28442	510550	226040	17.95	1	P13639
LAM(+15.99)QEFMILPVGAANFR	2	2009900	6704100	787330	397240	44.47	2	P06733
FLGVAEQLHNEGFK	2.8	1336500	689640	905690	391520	8.58	2	P31327
VDNDENEHQLSLR	3.5	2278600	59841	1917900	355820	64	2	P06748
RMATEVAADALGEEWK	7.3	321130	448200	459550	231170	3.16	1	P62753
AGNLGGGVVTIER	2.9	2486800	47487	1446700	509580	64	1	P35268
LTVSSLQESGLK	2.6	212870	57579	605190	132580	10.78	1	P21333
GMSLNLEPDNVGVVVFGNDK	1.4	1437800	3329900	1143800	313970	10.61	2	P25705
VLVGGGTGFIGTALTQLLNAR	8.9	35114	96919	16981	21179	18.02	1	Q9NRG7
VIDDTNITR	3.1	2807800	25350	1897600	428910	64	1	P05783
LQAILEDIQVTLFTR	3.2	299620	879310	93435	205010	42.4	2	P07814
TKTEISEMNR	3.2	2748800	6714.5	1883300	284240	64	2	P05787
VIQQLEGAFALVFK	1.4	150230	213330	19106	259120	13.56	1	Q06210
AYHEQLSVAEITNAC(+57.02)FEPANQMVK	2.6	5308400	13740000	4216500	3163300	64	1	Q71U36
A(+42.01)ATASAGAGGIDGKPR	2	206270	0	128690	43566	64	1	Q02978
FIIPQIVK	2.6	1461100	690720	2046300	2404400	3.48	1	P07195
HVLVTLGEK	3.6	592080	46545	1799500	243430	38.66	1	P60660
NADVELQQR	4.2	79451	0	109660	45434	64	1	O95782
GKNVLINK	10.2	99899	0	95177	116450	64	1	P27797
ILASPVELALVVMK	1.4	134160	286430	73562	0	64	1	Q9NYU2
VAGAQIQGAK	2.3	70378	0	85132	131870	64	1	Q13423
GVDEVTIVNILTNR	2.1	5353200	7109000	2853300	1883200	5.08	2	P07355
RQAMPFK	5.7	231560	0	352940	87659	64	1	P50914
NSSYFVEWIPNNVK	2.2	10143000	6935300	3875700	4988400	6.39	2	P07437
LQELDAASK	10.1	79856	18809	86558	97075	6.22	1	P09497
FDAGELITQR	2.9	605770	41900	432610	233640	40.93	1	P35232
TDITYPAGFMDVISIDK	7.6	1526600	723810	300840	213980	22.75	2	P62701
MVNPTVFFDIAVDGEPLGR	3.7	403640	1266600	243280	0	64	2	P62937
KTVTAMDVVYALK	2.4	2949900	241270	659690	2419100	35.15	2	P62805
VAFSVAR	9.1	508980	0	239300	202560	64	1	P39023
ETVYC(+57.02)LNDDDETEVLKEDIIQGFR	1.3	498040	1691100	171190	129850	64	1	P13010
GVTIAQGGVLPNIQAVLLPK	0.4	117290	397530	71626	0	64	2	P16104
EGVHGGLINK	3.8	148380	4530.6	403480	142750	64	1	P07737
IAGEASR	3.2	11936	0	19197	0	64	1	P06899
GVVPLAGTNGETTTQGLDGLSER	3.2	1363600	1613800	2145800	997330	3.08	2	P04075
S(+42.01)IHFSSPVFTSR	4.4	3463500	1541400	3358800	4282000	3.03	1	P08729
FYNLVLLPR	7.8	219970	259340	312670	57416	5.45	1	Q13895
TLAESALQLLYTAK	1.8	444520	1280200	341760	63807	20.06	1	Q9Y490
FGANAILGVSLAVC(+57.02)K	5.5	12663000	25371000	8987400	16109000	64	2	P06733
VQVEYKGETK	2.6	923840	4857.7	1394400	229810	64	2	P11142
VLQATVVAVGSGSK	5.8	3561600	579290	7036500	793930	12.15	2	P61604
SNFLNC(+57.02)YVSGFHPSDIEVDLLK	1.7	904570	2960400	296980	360850	64	1	P61769
TGTAEMSSILEER	2.4	650340	85052	1266400	191310	14.89	1	P25705
LLTSFLPAQLLR	2.6	4917700	3619400	586840	7015700	14.4	1	P08195
VLATVTKPVGGDK	1.9	675850	0	121640	64419	64	1	Q02878
FLAAGTHLGGTNLDFQMEQYIYK	3.1	1524700	2247700	351390	948880	7.26	2	P08865
DYNVTANSK	2.8	314210	0	521470	162220	64	1	P00338
AAAAAAALQAK	3.1	1122800	7487.1	586220	155080	64	1	P36578
VSFELFADK	3	1342200	529220	2348100	723240	4.44	1	P62937
FGQGGAGPVGGQGPR	3.8	1021700	30373	578100	246590	64	1	P23246
IGTDIQDNK	8.3	76489	0	180310	79579	64	1	P14324
EITALAPSTM(+15.99)K	3.2	2186600	563810	6698100	858410	11.88	1	P60709
ELNITAAK	2.3	840470	0	862060	320070	64	1	P62081
EYQELMNVK	2.8	4587400	91827	4692000	920670	64	1	P05787
C(+57.02)QLEINFNTLQTK	2.2	444880	416070	868570	452320	20.4	1	O43707
EIQVQHPAAK	4.8	804030	40618	1665200	1371100	41	1	P49368
LLVPTQYVGAIIGK	2.3	209530	198460	68022	174690	5.84	1	Q9NZI8
AGLPC(+57.02)QDLEFVQFHPTGIYGAGC(+57.02)LITEGC(+57.02)R	2.3	73176	143400	20947	128360	64	1	P31040
LEEQLENLIEFIR	8.8	114320	327550	27220	87748	22.17	2	Q15126
YLYEIAR	2.8	28673000	2969500	103720000	7954500	64	1	P02768
AGYTDKVVIGMDVAASEFFR	1.9	3277200	7954700	1927600	1702700	5.22	2	P06733
SQIHDIVLVGGSTR	3	1683700	323500	2507000	1487200	7.75	2	P11142
VNQIGSVTESLQAC(+57.02)K	2.5	4845200	1306600	12713000	5327300	64	2	P06733
EANQAINPK	9.5	60062	17733	168020	19740	9.47	1	P17844
FLFSLFGQK	2.3	358880	239190	45524	1014600	22.29	1	Q13155
QEEASGGPTAPK	7	2697200	56922	22807	2511200	64	1	P50552
LVFVHSAEGNEFWSALLEK	6.8	2658300	7166000	1698200	1702700	64	1	P07384
GSETDSAQDQPVK	12.4	51399	0	105690	22087	64	1	P30419
LC(+57.02)YVALDFEQEMATAASSSSLEK	1.4	21552000	51457000	18896000	15700000	64	2	P60709
EDLTEIRDM(+15.99)LLANKVPAAAR	4.8	249560	101410	251380	98260	5.57	1	P05388
SQYEQLAEQNRK	3.5	1267400	68220	4332000	286190	63.5	2	P13645
VLDFEHFLPMLQTVAK	1.5	1612300	3766800	689430	1144200	5.46	2	P60660
SPAVKPAAAPK	2.3	163770	0	170330	42011	64	2	Q14978
VNNSSLIGVGYTQTLRPGVK	2.7	2017300	622150	712540	2683200	6.51	2	P45880
SIQFVDWC(+57.02)PTGFK	2.4	2232900	3892900	2037600	2947500	64	1	P68366
NQAFIEMNTEEAANTMVNYYTSVTPVLR	3.2	450600	832630	150260	0	64	1	P26599
EAASAILSQADAR	7.3	886240	215900	2794300	270100	12.94	1	Q9BVP2
TVIEPMASEGLR	7.3	886240	215900	2794300	270100	12.94	1	P20020
ANPFGGASHAK	3	581760	1866.4	402180	168960	64	2	P62266
VMLYPSR	1.4	272420	0	271930	119000	64	1	P18077
EHHWVPR	1.9	20056	0	13963	37883	64	1	P78344
C(+57.02)DYENVPTTVFTPLEYGAC(+57.02)GLSEEK	1.4	135070	423750	79046	37478	64	1	Q16881
SAVEDEGLKGK	2.7	811540	33762	2222400	962740	64	1	P0DMV8
DAHALIYK	1.8	88967	2671.1	267770	24990	64	1	Q9NYK5
GPSADGALGVSISAPGGAIASVPNWTLR	11.4	30592	86480	24269	11620	64	1	P29144
GANPVEIRR	2.2	300880	12426	114900	271080	64	1	P10809
IRDWYQR	3.2	745410	47022	1997000	360590	42.47	2	Q04695
VATPVDWKDGDSVMVLPTIPEEEAK	1.4	713550	1388300	707050	210690	6.59	1	P30041
FSSSSGYGGGSSR	2.6	603650	14012	1701100	573560	64	1	P35527
TAQEVETYR	2.6	61809	0	64651	10645	64	1	P17844
VLSSIEQK	2.7	668280	15185	1390100	470950	64	1	P31947
YSQVLANGLDNK	2.5	742440	18373	617700	273860	64	1	P62269
S(+42.01)VRYSSSK	9.7	68626	25333	37944	191730	9.83	1	P13645
GAGTGGLGLAVEGPSEAK	2.8	764500	239840	2099800	265500	8.76	1	P21333
SGTSEFLNK	1.4	339330	0	538830	138670	64	1	P14625
AAAMANNLQK	3.2	94401	4694.4	48282	19717	64	1	Q14498
LLAQTTLR	3.1	408130	6737.4	515960	183850	64	1	P27105
ITFHGEGDQEPGLEPGDIIIVLDQK	1.7	859320	2670800	367300	87639	30.48	1	P31689
YVVVTGITPTPLGEGK	1.9	230780	226140	401980	112640	3.57	1	P11586
LISWYDNEFGYSNR	1.5	14962000	26794000	13190000	6497700	4.12	2	P04406
TLAQLNPESSLFIIASK	2.2	1752500	4190800	1228900	904220	6.11	2	P06744
DGNASGTTLLEALDC(+57.02)ILPPTRPTDKPLR	3.3	2796300	7865300	695490	2524100	64	2	P68104
ISDSEGFK	1.9	274390	0	128080	18852	64	1	P23246
LASVPAGGAVAVSAAPGSAAPAAGSAPAAAEEKKDEK	2.3	1740800	820980	868890	314100	15.79	2	P05387
AAQLAIR	8.3	1042600	54132	272080	2428700	44.87	1	P62910
DIENQYETQITQIEHEVSSSGQEVQSSAK	5.4	6680500	21447000	4251100	314410	64	2	P35527
AQAALAVNISAAR	2.6	378050	373260	547350	245390	2.23	1	P40227
KLLGGVTIAQGGVLPNIQAVLLPK	1.8	204070	324910	85701	405660	64	1	P16104
DAVTYTEHAK	3.4	28460000	28486	5002300	825740	64	2	P62805
ALKLPSTGEGTQFYLFENVDNAQQFK	5.5	3319600	10434000	2124700	520250	52.3	1	P30519
YAGLQGLMSVLAEIRPK	1.7	95801	265270	23422	80654	19.14	1	P35573
SESPKEPEQLR	5	993910	31560	1311300	168160	64	2	P09651
DIGFIKLD	1.3	606320	0	266400	143630	64	1	P62273
SMVEEGTGLR	7.2	219220	0	195140	357070	64	1	Q15149
SLDLDSIIAEVK	2.1	6630900	16131000	7623900	2265400	32.06	1	P04264
EDSQRPGAHLTVK	2.3	1798700	24645	2054900	561480	64	3	P09651
YEELQSLAGK	1.8	5501000	86610	5327800	934790	64	1	P05787
EKLEATINELV	4.8	1346200	1602000	2470800	669750	3.85	1	P10599
QAVTNPNNTFYATK	2.8	714890	33180	1217500	338030	38.3	1	P38646
NVEDFTGPR	9.5	384860	17765	1127700	198700	63.48	1	P61009
LIC(+57.02)C(+57.02)DILDVLDK	1.5	466670	1038800	374530	453390	64	1	P62258
LALDMEIHAYR	1.9	612520	692680	442170	474070	1.9	2	P02545
GANPVEIR	3.7	865180	22473	1764600	302630	64	1	P10809
NYEEIAKVEK	7.3	443230	40352	1456600	55553	36.1	1	P49755
TIAPALVSK	2.8	3897300	142290	11526000	2043500	64	1	P06733
VGGSGVNVNAK	1.8	102250	0	100580	179000	64	1	Q09666
LRSDAGLESDTAMK	4.9	1281500	68220	4332000	286190	63.5	2	Q9NR30
DNTYLVELSSLLVR	4.8	43620	140170	9858	0	64	1	Q96JB5
FSLSC(+57.02)SETLMGELGNIAK	1.8	226180	606040	165890	132810	64	2	Q9Y2T3
EAVFPFQPGSVAEVC(+57.02)ITFDQANLTVK	10	1378800	4480700	490220	534260	64	1	P09382
SSFYVNGLTLGGQK	2.3	2628100	2168300	4962500	2432500	5.23	1	P07737
THINIVVIGHVDSGK	2.6	5782900	4381600	6379000	6001800	1.46	3	P68104
ILSISADIETIGEILK	2.4	559340	1996200	189040	0	64	1	P61978
EGMNIVEAMER	2.5	1654500	205070	2830400	658570	14.26	1	P62937
VAGGAAPSKPASAK	2.2	45030	0	90800	34026	64	2	Q14978
VANVSLLALYK	2.2	1158000	51498	199830	663790	64	1	P62266
IMDPNIVGSEHYDVAR	2.5	1579200	318770	2045700	414490	11.1	2	P06576
WPLWLSPFQVVVIPVGSEQEEYAK	8.6	319600	1149000	126060	0	64	1	Q9BW92
NTLQLHR	1.8	685820	0	265820	97376	64	1	P61313
TIDGQQTIIAC(+57.02)IESHQFQPK	1.7	313960	740730	292930	222190	64	1	P52907
TLLDILADGTILK	1.3	124590	276070	81769	120140	13.54	1	Q9NVH0
IVATKPLYVALAQR	2.5	2160800	431270	741420	4675500	10.84	2	P11940
MGGFGSIIQLYPGGGPVR	3.4	88078	225760	41915	42426	5.39	1	Q9UJA5
TQLASWSDPTEETGPVAGILDTETLEK	3.1	1884100	5629200	1131800	255400	22.04	1	Q15149
VISELNGKNIEDVIAQGIGK	7.3	792970	1814600	613160	539140	8.85	1	P05387
TQGFLALFSGDTGEIK	1.1	219670	484020	101090	98369	4.92	1	Q9Y230
QNFLLFDMTTHPLTNNNIK	7.6	565250	556890	466880	1138900	11.58	1	Q9H4A6
PMFIVNTNVPR	2.4	3186600	709180	3620500	5895500	8.31	1	P14174
LLFNDVQTLK	2.5	269320	61961	293350	116180	9.78	1	Q15149
EC(+57.02)C(+57.02)HGDLLEC(+57.02)ADDRADLAK	1.7	17385000	9985100	55936000	3589400	64	3	P02768
DLLDLLVEAK	2.6	323010	602820	129150	91025	6.62	1	O00571
FIAVGYVDDTQFVR	2.1	1577100	1572200	1240100	231510	14.1	1	P04439
MDAYALAPYAGAGPLVGVPGVGAPTPFSFPK	5.3	83559	289000	25078	0	64	1	Q6ZRV2
AQQELEEQTRR	3	197900	737.33	477820	10344	64	2	P26038
LASYLDR	4.2	2536800	19961	2126200	640290	64	1	P05783
LSDLDYMQFIR	3.1	323230	427890	646350	0	64	1	P82933
ERLEQQVPVNQVFGQDEMIDVIGVTK	2	3665000	2844100	497320	348170	31.51	1	P39023
EYFGGFGEVESIELPMDNK	1.4	542010	799650	272940	137590	6.96	2	Q14103
MKETAENYLGHTAK	2.4	704790	5613.3	391760	189830	64	3	P38646
SLDLDGIIAEVK	2.5	2118400	3814700	1637200	282960	13.48	1	P08729
DFSALESQLQDTQELLQEENR	2.4	1528600	5018100	799470	152150	34.71	2	P35579
LEAEIATYR	3.4	553920	28183	682550	152200	48	1	P05783
GVTIASGGVLPNIHPELLAK	2.5	1222500	1380600	445590	287210	9.67	2	O75367
M(+15.99)TLDDFR	4.6	364040	18341	1222700	84274	64	1	P35527
MASTFIGNSTAIQELFK	1.9	2521500	4303800	84223	2134100	51.1	2	Q9BUF5
AVTGYRDPYSGSTISLFQAMQK	1.6	1837700	5578700	1150100	278450	20.04	1	Q15149
MIAGQVLDINLAAEPK	2.4	5812600	1994100	1681100	1156000	15.93	2	P07910
RFHPSLR	12.9	82563	0	229430	53056	64	1	P46087
TTSGYAGGLSSAYGGLTSPGLSYSLGSSFGSGAGSSSFSR	1.8	3425800	5821600	476360	1104000	13.23	2	P05787
YVQFLSGLLSGSVK	11.9	152870	483840	31055	84378	39.62	1	Q68CZ2
QLYEEEIR	3.8	484290	23372	1186900	0	64	1	P05787
LTVNEAVK	11.3	70268	10421	114690	89953	11.01	1	Q15149
EADDIVNWLK	2	641550	169300	1039200	213650	6.76	1	P07237
RPWILTSLHNGVIQLWDYR	8.7	316530	658570	486800	113050	64	1	P53621
GAGTDDSTLVR	8.8	90702	5798.3	67636	96474	33.27	1	P20073
YFTEAGLK	2.8	162120	0	335050	65202	64	1	Q7L1Q6
TVTAMDVVYALK	1.8	20238000	1312400	3229400	4537400	54.76	2	P62805
YYELLLVNPIWLVPPTK	9.6	56212	162300	16981	29851	10.32	2	Q96S66
GLSEDTTEETLKESFDGSVR	2.6	4207700	2060400	2484100	602200	19.4	2	P19338
LNIISNLDC(+57.02)VNEVIGIR	1.6	355460	1005900	185450	230440	64	2	P30153
VANAESLNAIGVLIYMDQTK	2.6	420500	1202000	246030	142350	13.13	2	P02786
EQSILELGSLLAK	2.4	179370	378300	106270	114920	3.56	1	O00231
EAVVNTQELLDLLVK	6.5	273940	465850	66335	522210	12.63	1	Q6P2Q9
GLGTDEESILTLLTSR	3.5	3003300	9088300	1265500	226350	40.15	2	P08758
ALQATVGNSYK	2.6	372890	6569.2	327810	121720	64	1	P11279
YSAVDTNPLSLYVMHPFWNTIVK	8.8	3313800	11483000	1198900	244990	46.87	1	Q9C0D9
GDVTAQIALQPALK	7	1018400	1285600	2171400	206080	10.54	2	P04179
AATFGLILDDVSLTHLTFGKEFTEAVEAK	12.6	91164	0	0	88298	64	1	P35232
GGLGGGYGGASGM(+15.99)GGITAVTVNQSLLSPLVLEVDPNIQAVR	2.9	428360	1309800	53308	0	64	2	P05787
MYEEHLK	6.3	194170	0	209030	384640	64	2	P84090
QLEKDFSSMKK	6.7	466190	102870	1291900	285920	12.56	2	P39023
AAVPSIK	1.8	391250	0	804870	414800	64	1	P00558
LLGTIYTAAEEIEAVGGK	4.3	341040	732230	163680	82287	8.9	2	Q6YN16
ITGEAFVQFASQELAEK	2.6	2055600	3232100	914780	61453	64	2	P52597
STTTGHLIYK	3.1	3018300	59661	2576100	2165300	64	2	P68104
NQGATC(+57.02)YMNSLLQTLFFTNQLRK	9.1	143510	453830	50456	65708	64	1	Q93009
GTPAGTTPGASQAPK	6.8	101120	45600	20094	114160	11.18	1	Q8IVT2
ATEQLQIVLR	5.8	248910	127020	259240	525020	6.22	1	Q8TEX9
LVLVGDGGTGK	3	1056800	78182	1260200	1386300	19.22	1	P62826
EIVTNFLAGFEA	2.7	279410	808270	152830	66682	12.12	1	P25705
GLFIIDDK	2.7	1255600	214620	3032000	791400	14.13	1	Q06830
EDGNEEDKENQGDETQGQQPPQRR	3.1	189600	2309.4	95872	0	64	1	P67809
LIKEPAPDSGLLGLFQGQNSLLH	7.1	1016700	3098600	355110	563450	62.36	1	Q96AB3
AIAELGIYPAVDPLDSTSR	2.3	2516700	4805200	2155300	624730	7.69	2	P06576
ALLEAGALPNAPNSYGR	2	284840	295690	563950	166850	5	1	P42771
VVLIGGKPDR	2.2	671950	0	357620	521000	64	2	P61978
YVASYLLAALGGNSSPSAK	1.8	11062000	7935300	1974600	21009000	10.64	2	P05387
GTDVNVFNTILTTR	1.8	895410	863720	603150	580280	2.64	1	P04083
LFFLQVK	2.2	1124000	279670	855480	2675100	9.57	1	P26038
ILELDQFK	3	244950	46901	495820	138040	10.57	1	P12956
GAEVYHNLK	3.6	329030	34976	808820	237020	23.13	1	P06733
IKWGDAGAEYVVESTGVFTTM(+15.99)EK	1.4	875250	2874900	387570	141440	29.6	1	P04406
VIGSGC(+57.02)NLDSAR	3.6	1400600	77328	3637000	1866500	64	1	P00338
SDLYSSGR	10.9	37239	0	109880	27301	64	1	P38159
LATALQK	4.2	343510	7185.2	832960	297680	64	1	P67936
GTLVQTK	9.8	240600	3367.3	389310	557090	64	1	P16403
GVLFGVPGAFTPGC(+57.02)SK	3.8	864900	1800100	840500	762250	31.71	1	P30044
LGFDKENVYDELR	10.4	3453700	9393400	304590	3672100	30.84	2	O60264
LPTGQISGPEIK	10.7	132150	16273	203010	88238	13.59	1	Q09666
A(+42.01)SMGTLAFDEYGRPFLIIK	2.5	135470	91123	14616	97126	23.19	1	P48643
IALGIPLPEIK	2.4	817900	527440	365990	471130	5.21	1	P31327
TFQFQPSK	9.1	238860	0	538830	138670	64	1	Q8WTV0
VGQASEIAR	2.6	111490	2671.1	267770	24990	64	1	Q99459
TKDGLEVAVLPHNIR	12.5	925630	2082000	952960	511380	13.33	1	Q14690
GLLPEELTPLILATQK	2.9	526410	1005000	227950	127470	7.88	2	P13804
KVAHSDKPGSTSTASFR	2.4	33460	0	53841	36112	64	2	Q9P0L0
MGANSLER	7.9	400400	4182.8	240130	92898	64	1	P52272
PGVNAQFLPGFLMGDLPAPVTPQPR	6.4	581980	1922900	248210	125840	62.08	1	Q8NFH5
IAPSFAVESIEDALK	2.3	2768400	4542700	1319900	520910	9	2	P31327
A(+42.01)DQLTEEQIAEFK	2.5	716730	0	849550	178780	64	1	P0DP24
KESYSIYVYK	2.4	3574700	227940	3349300	1675500	39.69	2	P06899
EC(+57.02)LPLIIFLR	1.5	40986	79593	0	84352	64	1	P62701
SIYYITGESK	2.8	1413400	43853	2540000	1074800	57.92	1	P08238
EGVKTENNDHINLK	6.2	163630	33331	482910	16737	28.85	1	P61956
IKWGDAGAEYVVESTGVFTTMEK	1.9	3764200	4959000	2038300	2023800	2.98	2	P04406
DRSEEERTTEAEKNER	5.4	14610	2249.3	10042	30783	13.69	2	P26038
YVFTDISYSIPHR	12	3397700	9393400	304590	3672100	42.61	2	P82650
VKGEYDVTVPK	9.2	151350	78349	244520	241430	5.95	1	Q09666
APPKAEAK	2.4	35246	0	108980	14172	64	1	P62750
LSVVHEK	2.4	35246	0	108980	14172	64	1	P20810
DLQQYQSQAK	4.7	361030	4697.1	1005100	135050	64	1	O75396
LSKEDIER	6.2	882740	24005	1462500	217080	64	2	P11142
KIQQNTFTR	8.9	53410	0	59161	76518	64	1	P21333
QVFGHLEFLSGEKK	6.4	757850	520640	1500100	982000	52.37	1	Q1ED39
ASLEAAIADAEQRGELAIK	2.2	6672500	6989600	2507800	680540	24.26	2	P05787
GRAPQVLVLAPTR	0.7	369130	0	0	467690	64	2	Q9NR30
LDQLIYIPLPDEK	1.9	742540	1650100	563040	174610	9.45	1	P55072
LAQYEPPQEEK	10.1	87247	0	168850	48176	64	1	Q99417
VEVERDNLAEDIMR	2.4	2829300	456190	3091600	556310	15.81	2	P08670
SADTLWDIQK	2.4	1210200	111800	2975400	535970	26.61	1	P07195
VISELNGK	2.2	720950	0	862060	320070	64	1	P05387
LVLEQVVTSIASVADTAEEK	5.1	445420	1400700	181980	103130	14.62	2	O00410
KVVDYTTAK	2.2	64548	0	51875	59678	64	1	P62820
RLEVLDSTK	13	126220	0	232390	58513	64	1	P47985
SMFAGVPTMR	1.6	221180	0	147100	161790	64	1	O15260
QAVDVSPLR	1.2	334410	0	276690	127540	64	1	P46782
EAAENSLVAYK	4	788640	25699	2081700	196410	64	1	P62258
TENNDHINLK	7.8	100840	0	319470	34737	64	2	P61956
KISIPVDISDSDMMLNIINSSITTK	2.4	107070	136060	33270	91897	5.02	1	P49368
IVPVEITISLLK	2.4	325390	873420	152940	243830	27.83	1	P30085
TDYNASVSVPDSSGPER	3.5	1763100	132300	2154100	413530	32.9	2	P61978
KGDIVDIK	1.9	798210	0	209400	81715	64	1	P46778
GTVTDFPGFDER	2.8	642230	212590	1590800	220160	7.48	1	P08758
QEYVDYSESAKK	8.8	469470	34162	1457300	215720	42.66	2	O60832
NIPGITLLNVSK	2.2	2229000	391040	451350	636650	19.02	1	P36578
AYGQALAK	1.8	102880	0	247640	34158	64	1	P29401
WGMPPQDAFTTQWLVR	6.4	237140	589090	187110	90616	7.21	1	Q12873
IGYIYALLFVNK	1.8	58192	62962	17732	56759	5.38	1	O43813
VTASGPGLSSYGVPASLPVDFAIDAR	1.1	573250	1502000	314480	172900	8.69	2	O75369
A(+42.01)AGTLYTYPENWR	1.9	782730	407940	1028300	516030	2.89	1	P26641
FSHEEIAMATVTALR	2.4	1267300	1703700	1604300	1144900	2.76	2	P04075
TTPDVIFVFGFR	2.5	1047300	1583200	281230	266390	7.73	1	P62847
EISLWFKPEELVDYK	1.9	718580	1439200	352360	620760	4.08	2	P22392
LNFSHGTHEYHAETIK	3.3	1799800	604640	2614400	1205500	4.59	3	P14618
EIAQDFK	3.9	7320300	39582	3838600	668680	64	1	Q71DI3
FLSQPFQVAEVFTGHMGK	2	2546900	3612600	970780	1325100	4.41	2	P06576
IPSAVGYQPTLATDMGTMQER	2	1355100	595080	1321000	344070	9.19	2	P06576
SQTIYEIIDNSQGFYVC(+57.02)PVEPQNR	3	153570	500520	46671	67078	64	1	Q9Y617
VFGNEIK	9.4	2402400	98792	5594100	1875500	56.62	1	P19338
LYGSGDQEAWQK	7	152340	109480	77634	130150	3.76	1	P28838
LSKEEIER	9	418640	18820	484010	84739	57.76	2	P0DMV8
EFNAEVHR	4.6	176420	0	175580	72951	64	2	P46777
LTSLNVK	2.7	184660	0	167840	119330	64	1	P26599
GYAFIEFASFEDAK	2.6	793210	1139600	243870	276210	6.2	1	P19338
ILPEAHQR	9	15461	0	19839	13284	64	1	P26640
IVEIDAHIGC(+57.02)AMSGLIADAK	0.8	517260	1214400	341830	512810	64	2	P28066
SLTNDWEDHLAVK	3.1	3298500	764890	3932200	2511800	7.82	2	P08238
QAQIEVVPSASALIIK	2.4	2006000	1203200	906080	632360	8.35	2	P30050
YHTINGHNAEVR	2.7	1034300	9774.4	783270	262490	64	3	P22626
LSELEAALQR	2.8	7048400	273160	5653800	1265100	64	1	P05787
VIFGLFGK	2.7	807720	346380	647680	1663300	4.8	1	P23284
ALMDEVVK	2.7	785270	16027	1935100	388430	64	1	P00558
VAVATPAK	2.1	295790	0	244790	124850	64	1	P19338
INDYVEK	5.8	1360400	53513	4349000	300060	64	1	P01009
VASLEESEGNKQDLK	5.6	208090	62632	80065	343360	5.53	2	Q07065
WFNGQPIHAELSPVTDFR	6.2	859810	1167500	784150	317820	3.68	1	P0DN76
TIEKFEK	5.8	476060	10881	1617000	191300	64	1	P68104
FPSIVGRPR	6.3	10485000	1356200	6343000	30134000	22.22	2	P60709
SGDAAIVDMVPGKPMC(+57.02)VESFSDYPPLGR	6.2	4844500	11010000	2911500	5111000	31.8	2	P68104
KPLVIIAEDVDGEALSTLVLNR	1.7	9717700	27030000	4337700	1748600	15.46	3	P10809
VATAQDDITGDGTTSNVLIIGELLK	3.1	1424700	4066000	528260	155590	26.13	2	P40227
SSFGSGAGSSSFSR	9.5	211980	12768	647800	100650	50.74	1	P05787
SPILVATAVAAR	2.4	708830	66445	445330	261840	31.03	1	O00571
ELALSALLK	13.2	1126500	0	2046300	2404400	64	1	Q9BVI4
EGDLPPLWWYIVTRPR	8.8	459340	1072300	217630	223960	4.93	1	Q9Y6M9
DVDAAYMSK	2	414940	0	641490	91375	64	1	P08729
REPLPSR	3.6	43014	0	132130	39925	64	1	P38159
LVDQNIFSFYLSR	2.7	172030	433040	95470	71054	6.09	1	P07339
DATNVGDEGGFAPNILENNEALELLK	4.7	399240	1421200	171110	0	64	2	P13929
DIDEIVLVGGSTR	8.9	311220	434930	171480	427620	2.54	1	P11021
VPADTEVVC(+57.02)APPTAYIDFAR	2.7	3138500	7338700	3718800	1487000	64	2	P60174
VAIDVGYR	3.2	174180	9161	412350	102590	45.01	1	P15121
GNPTVEVDLFTSK	1.4	7108300	4803300	16331000	4282000	5.41	2	P06733
EQQIVIQSSGGLSKDDIENMVK	2.8	1598300	1850500	1072100	388970	7.92	2	P38646
AAYLQETGKPLDETLKK	2.5	1454500	199150	1456600	462480	18.58	3	P04083
IDKPILK	3.1	371170	0	96437	49785	64	1	P62917
LGFFTTYFLPLANTLK	4.4	356860	788530	113160	232710	6.97	2	Q5JTH9
VLANPGNSQVAR	3.7	269260	13889	409730	114590	38.79	1	Q14974
IAVAAQNC(+57.02)YK	12.3	459580	24548	1143800	484500	46.59	1	P60174
ARSDEGQLSPATR	3	97668	737.33	292600	10344	64	1	Q15149
VTLGTQPTVLR	2.5	51423	0	123700	40035	64	1	Q16531
LQEMEGTVK	16.9	121210	17765	242750	198700	13.66	1	P35579
IFQNLNGALDEVVLK	0.8	42289	0	0	33072	64	1	O60568
ILATPPQEDAPSVDIANIR	2.4	3664000	5056100	5944700	1106200	5.37	2	P29401
DYGVLLEGSGLALR	1.7	1325100	634150	572700	293140	12.96	1	P30048
AYTNFDAERDALNIETAIK	2	1208700	1370000	791540	147310	17.15	1	P07355
TRLEQEIATYR	3.2	1569200	614640	4592200	244220	18.8	2	Q04695
YEELFPAFSDSR	3.3	1372600	2812700	1251600	1317400	25.91	1	P54920
PGGLLLGDVAPNFEANTTVGR	2.6	2395200	5447500	1572400	978020	5.57	2	P30041
GGSGGGGSISGGGYGSGGGSGGR	7.3	232770	46438	702810	120430	15.13	2	P35908
TLQLTPGFPNPAVAEAYLKPVVDDSK	12.7	7726.4	0	0	21563	64	1	P28715
FAAATGATPIAGR	3.4	1567900	57194	2332600	709160	55.47	1	P08865
LNSASLK	0.1	42226	0	107450	61455	64	1	P08174
LGTLSALDILIK	2.1	51899	90870	16052	53914	5.66	1	Q86VP6
VTMQNLNDR	2.9	1199900	22238	4189900	352080	64	1	P13645
VYVGNLGTGAGKGELER	2.1	498060	27807	257450	123470	56.95	2	Q16629
AQNVTLEAILQNATSDNPVVQLSAVQAAR	7.5	146760	227200	287790	0	64	1	O00505
QLQDEMLR	3	265320	0	431370	52090	64	1	P02545
GKFEDMAK	1.3	159530	0	341540	84637	64	2	P09429
EVDEQMLNVQNK	6.6	4561800	106550	5436100	1127300	64	2	P07437
IHFFLSK	2.7	195230	0	279880	239840	64	1	P35659
QAASSLQQASLK	3.2	613230	10551	801700	313910	64	1	P38646
FYALSASFEPFSNK	1.8	1739800	3307500	1275900	1053500	3.14	1	P27797
TDTGEPMGR	1.5	107340	0	394340	35031	64	1	P07900
LAQANGWGVM(+15.99)VSHR	1.8	375720	226470	995310	281110	64	2	P06733
RGDFIPGLR	2.7	2205500	198040	4965200	3212500	25.07	1	P08559
SGWAIDPFGHSPTMAYLLNR	9.7	63886	138910	61261	22969	6.05	1	Q16706
LEVAPISDIIAIK	1.8	339790	425710	271300	151370	3.37	1	P13804
LISTVSK	3.7	289890	1984	628990	485920	64	1	Q9Y3B9
FEGGVVIAADMLGSYGSLAR	1.9	408450	1046200	298340	154300	7.75	2	P28070
WGASTATTQK	6.3	55191	0	30729	13892	64	1	Q9UKV3
DRDMDELKK	4.2	36543	0	72299	2102.9	64	1	P05023
IINEPTAAAIAYGLDR	2.3	1972700	1542100	1214600	579310	7.86	2	P0DMV8
FGYVDFESAEDLEK	2.1	1557600	538740	598430	136490	36.32	1	P19338
EAEAAIYHLQLFEELRR	2.6	3748500	7182300	1839500	1755000	4.09	3	P14618
KSSTPEEVK	4.1	7740.3	0	7201.9	15942	64	1	P23528
NKYEDEINKR	2.8	1701400	45203	4155100	366760	64	3	P05787
GAGSYTIMVLFADQATPTSPIR	2.8	1143300	3311300	646340	488200	25.97	2	P21333
SPYGGGRPGR	8.1	36127	0	18863	79579	64	1	P46781
AEVAAGDDKK	8.1	36127	0	18863	79579	64	1	P63104
QVSDLISVLR	3.2	491250	187260	326610	331840	5.98	1	P17844
SSEMNVLIPTEGGDFNEFPVPEQFK	1.9	303980	843890	121150	82418	10.24	1	Q01518
HNIQDEDTIHIWK	4.8	172760	33280	471550	144590	14.17	1	O15031
LLSISGKR	9.8	486440	0	0	957300	64	1	P06748
SLYYYIQQDTK	2.9	1773100	454420	1923200	1076900	8.01	1	P07355
WGDAGAEYVVESTGVFTTMEK	1.4	8764500	19302000	4741500	3677000	5.25	2	P04406
GHESEVFIC(+57.02)AWNPVSDLLASGSGDSTAR	1.4	34838	76343	17374	45634	64	1	Q9BZK7
IVEMSTSK	2	1027700	3695.4	1109600	385060	64	1	P63241
VPVHDVTDASK	5.4	221450	1186	718260	56210	64	2	P21333
A(+42.01)AGTAAALAFLSQESR	3.5	690480	1087300	157590	44888	32.8	1	O75607
LVQAFQFTDK	2.5	3265400	647580	6825500	1736500	10.54	1	Q06830
SGPFGQIFRPDNFVFGQSGAGNNWAK	10.7	22265000	7092900	1223700	34170000	38.06	2	P07437
AAFDDAIAELDTLSEESYK	1.9	452030	1251300	274410	116320	10.76	2	P62258
QVLLGDQIPK	2.2	161010	18381	412260	95225	22.43	1	P28072
ATIAGGGVIPHIHK	2.7	2992100	169540	2519900	1413400	46.39	3	P0C0S5
YHTSQSGDEMTSLSEYVSR	2.8	2723400	1373000	3312700	1891600	3.14	2	P08238
SKDDQVTVIGAGVTLHEALAAAELLK	5.4	617660	1284900	241030	660560	5.33	2	P29401
ISSIQSIVPALEIANAHR	1.8	6596800	9962800	3249400	1854300	6.11	2	P10809
GAFGKPQGTVAR	2	801330	1162.2	341300	315180	64	2	P27635
LFIGGLSFETTEESLR	5	6062100	6160300	1148100	793920	20.34	2	P22626
AYGELPEHAK	8.5	317570	0	208930	124890	64	2	P47813
VNHVTLSQPK	2.4	584200	3803.5	1025100	134750	64	2	P61769
YLAEKYEWDVAEAR	2.3	772380	242240	890280	657410	5.36	2	P13639
AINIGQLVDVK	9	103780	0	96638	88018	64	1	Q14690
SYGPAPGAGHVQEESNLSLQALESR	2.3	366390	624740	228480	96650	6.46	1	Q13155
SVVLMSHLGRPDGVPMPDKYSLEPVAVELK	2.2	2082600	1651900	382220	1766300	11.85	3	P00558
DFSWSPGGNIIAFWVPEDKDIPAR	7.9	192520	481310	43194	0	64	1	P55884
MQASIEK	2.3	701400	4100.8	1509400	337810	64	1	P06748
QVTITGSAASISLAQYLINAR	1.5	1292600	1991500	366760	1884600	5.43	2	Q15365
ADLEMQIENLKEELAYLK	2	493740	1202000	246030	142350	8.44	2	Q04695
NLANTVTEEILEK	1.6	1280200	583740	567510	260360	14.25	1	O60506
AAATAEEPDPK	4.9	62861	0	164880	0	64	1	Q99733
VGEVIVTK	1.9	528870	7922.3	920290	138730	64	1	P10809
FIDTTSK	4.3	604700	103210	1077700	295550	10.44	1	P39023
LTGM(+15.99)AFR	4	399270	103210	1077700	295550	10.44	1	P04406
NLTNPNTVIILIGNK	1.6	386550	493930	258220	211930	2.75	1	P61106
AEWQVYKEEISR	9.8	283800	41963	895490	77792	21.34	1	Q00059
RLEEWLGR	8.5	104690	0	282900	41234	64	1	P56192
GLAPDLPEDLYHLIK	2.2	2089000	1805100	271150	874950	19.93	2	P62277
VNILEVASGAVLR	7.7	509220	592060	386570	972860	11.4	1	Q12788
IGTVSIFHMSDSYSETPLEDFVPQK	6.6	302210	564510	0	358340	64	1	Q14690
KIFVGTK	1.7	92093	0	66297	281660	64	1	P62701
VVFEQTK	3.3	449110	8315	1221600	280760	64	1	P60174
GFQEVVTPNIFNSR	3.3	234280	366930	291240	144930	2.74	1	P26639
IALLEEAR	2.4	154090	0	396900	103870	64	1	P15311
VEVSEDEPASK	12.9	157610	0	31874	555630	64	1	O75683
NRDYPLASK	9.2	62272	58471	47564	75958	1.6	1	P12268
YITGDQLGALYQDFVR	0.7	25452	97092	4714	0	64	1	P09104
IFVGGLSPDTPEEK	2.1	1626800	151370	1657600	470920	27.93	1	Q14103
GNLGAGNGNLQGPR	2.1	124700	0	91363	66369	64	1	P43243
RTDEAAFQK	4.2	71260	52731	159260	38278	4.58	1	P26447
GGMGSGGLATGIAGGLAGMGGIQNEK	2.4	1786700	701620	773010	1460200	6	2	P05783
TVSLGAGAK	1.1	133220	0	0	49610	64	1	P06748
LC(+57.02)VLHEK	5.7	5575600	379750	19896000	1919700	64	1	P02768
ILDIDNVDLAMGK	8.1	207930	228740	97430	322620	3.31	1	O43615
C(+57.02)IQMWFDPAQGNPNEEVAR	0.8	481110	836310	724630	363480	64	2	P15328
LKSDTAAAAVR	3.1	90260	0	180850	45621	64	2	P22314
QEDKDDLDVTELTNEDLLDQLVK	1.1	600010	1454800	201920	23464	62	1	P42167
EAINVEQAFQTIAR	2.1	624670	432240	318870	281050	5.22	2	P51149
IMIHQPSGGAR	12.1	37756	0	28207	60240	64	1	Q16740
LAALPNVYEVISK	2.3	295340	204470	189060	136330	4.78	1	P33992
DQVANSAFVER	3.6	910370	20579	1678400	458050	64	1	P07900
EGALC(+57.02)EENMR	4.4	136990	3162.5	464010	80798	64	1	P13639
FEELNADLFR	1.9	374740	210350	444110	148960	4.67	1	P11142
A(+42.01)ASTASHRPIK	10.6	29469	1983.9	44200	14047	29.06	1	P41236
IYQAFLMSATFNEDVQALK	8.5	73989	165260	37049	76744	9.78	1	Q9NY93
GYISPYFINTSK	2.2	4435100	1057700	3703300	2920400	9.51	1	P10809
GSEHQAIVQHLEK	10	209140	43193	56667	697880	17.98	1	Q14690
NAVITVPAYFNDSQR	2.1	1340200	531710	1178900	499040	6.31	1	P38646
FTLDC(+57.02)THPVEDGIMDAANFEQFLQER	1.3	170060	269620	47937	362690	64	1	P35268
LRPLYDIPYMFEAR	1.4	224910	124310	125750	245580	3.25	2	Q7KZF4
QLSSGVSEIR	5.1	813050	95105	1706000	82930	20.57	1	P04792
KLWAYLTINQLLAER	7.8	1635200	4190800	1228900	434730	9.64	2	P19823
VAVEEVDEEGKFVR	2.7	1651300	146840	2193400	313000	26.91	2	P02545
MYKEEGLK	3.2	391850	0	382790	146150	64	2	Q00325
SMVPVQVQLDVPVVK	2.4	221580	183880	158650	130030	3.18	1	P18754
A(+42.01)AAAKPNNLSLVVHGPGDLR	4.1	289530	383920	308520	92042	4.17	1	Q00796
KYDAFLASESLIK	2.4	3395700	368880	763100	567580	32.21	2	P62906
VGKGEPGAAPLSAPAFSLVFPFLK	6.2	57729	22004	0	0	64	1	Q92616
TKGVDEVTIVNILTNR	1.8	1293600	791550	502030	335970	10.55	2	P07355
FANYIDK	3	909260	17466	1710700	434520	64	1	P08670
FVVEDYDATSPNDFVGQFTLPLSSLK	1.8	114220	287690	111020	30062	10.24	1	Q8N3E9
LNLEAINYMAADGDFK	2.3	2074800	2909500	1484300	438930	7.9	2	P09382
FWEVISDEHGIDPTGTYHGDSDLQLER	1.8	5618900	4338400	849570	1104200	19.05	2	P68371
DLYDAGVK	2.9	1317900	53513	4349000	106170	64	1	P07355
YTRPTPVQK	1.8	265180	0	177800	44179	64	2	O00571
GMGPGTPAGYGR	3.5	189160	0	95435	54946	64	1	P23246
LFQVEYAIEAIK	1.4	284500	0	492370	324410	64	1	P28066
MTDQEAIQDLWQWR	2.3	5998700	1702900	807490	1455900	24.8	2	P06748
GGEIQPVSVK	1.9	924430	0	1920400	129630	64	1	P61604
AYAQGISR	1.6	97876	0	151890	38810	64	1	O75390
YISAAPGAEAK	8.8	189800	22749	196830	470900	20.7	1	Q14671
TNEKVELQELNDR	3	2034400	172360	3338400	314640	25.02	2	P08670
TVIIEQSWGSPK	2.9	3743500	317230	4853400	1105600	27.42	1	P10809
DFLAGGVAAAISK	2.4	1899600	358850	1044600	819170	14.98	1	P05141
LQSIGTENTEENR	3.7	68957	1875.9	192150	32017	64	1	P04075
GNENANGAPAITLLIR	13	485780	953720	687300	34086	27.98	1	Q9Y5B9
KLVAEVSLQNPLPVALEGC(+57.02)TFTVEGAGLTEEQK	0.6	86622	314930	31561	0	64	1	P21980
LPDGSEIPLPPILLGR	0	27596	93617	16768	0	64	1	Q96KP4
GSITSVQAIYVPADDLTDPAPATTFAHLDATTVLSR	2.1	662350	2180100	244710	107190	20.34	2	P06576
SSVPPSK	2.9	442040	3376.3	845720	190370	64	1	O14924
IINEPTAAAIAYGLDKK	2.3	4393200	2979000	3485400	2416300	3.6	2	P11142
LQQLPADFGR	8.2	728410	201210	285860	1242900	6.18	1	Q96AG4
GGPNYQEGLR	4	130680	22238	127240	352080	16.63	1	P53396
NKLQYFMEQFYGIIR	2.5	574260	1838600	263160	131810	28.95	2	P78527
DDNMFQIGK	1.9	428290	0	679620	145260	64	1	P53999
IDMNLTDLLGELQR	2.7	30378	53085	0	15102	64	1	Q15436
A(+42.01)FKDTGKTPVEPEVAIHR	2.9	222100	184020	184520	234880	1.55	1	P60866
VLDSGAPIKIPVGPETLGR	4.9	2819000	3387000	2062800	1813200	2.21	2	P06576
DSLLQDGEFSMDLR	1.8	3641100	5495900	6210700	1056500	5.88	2	P07737
DPQAVSDILEKLVK	5.1	338640	444480	204400	440340	2.17	1	Q99460
HGVQELEIELQSQLSK	2.5	3144700	7015900	3873200	1406000	24.73	2	P35527
IAGYVTHLMK	2	1688500	29698	776010	888710	64	2	P08708
NLLIFENLIDLK	3.4	122440	309810	27092	0	64	1	P78527
TIIGSFNGALAAVPVQDLGSTVIK	2	197680	613850	96867	65934	43.69	2	Q9BWD1
FLDASGAK	8.8	97426	0	201440	22257	64	1	Q7L1Q6
SPAGLQVLNDYLADK	2.4	1005300	2008900	836960	308050	6.52	1	P24534
GATQQILDEAER	7.4	263450	264500	593280	129980	8.99	1	P78371
LLLQVQHASK	2.8	2400700	0	1559500	1148700	64	2	P05141
GSQEVLGHAAR	12.1	20905	3993.4	56181	9405.2	14.07	1	Q96AA3
MQHLIAR	3.2	199010	4206.3	465080	147010	64	1	P14618
VNILFDFVK	2.5	159850	241640	89673	126210	2.69	1	P55010
QGVDADINGLR	2.7	1428100	134620	4831600	660450	56.36	1	P35527
FGQAATMEGIGAIGGTPPAFNR	2.8	2033900	1109400	630180	507380	11.61	2	Q15233
IILGGFSQGGALSLYTALTTQQK	5.7	181000	358590	159310	159020	7.62	1	O75608
AQLNIGNVLPVGTMPEGTIVC(+57.02)C(+57.02)LEEKPGDR	1.6	133700	315460	68091	151230	64	1	P62917
WEVADLQPQLK	2.1	593380	1506400	348860	329160	7.96	1	P22695
IILDLISESPIK	1.9	1478500	592060	386570	972860	10.25	1	P61978
LESGMQNM(+15.99)SIHTK	3.4	84494	16615	197790	33769	11.9	2	P05787
DVLSVAFSSDNR	3.2	950990	111140	860880	418700	21.71	1	P63244
VALRGEDVPLTEQTVSQVLQSAK	2.1	339110	772290	219470	134370	5.75	1	P61923
KVGYTPDWIFLLR	0.4	172490	0	0	492300	64	2	Q00610
IGDTSVSYK	1.6	80634	0	69170	136070	64	1	P20700
A(+42.01)SGVAVSDGVIK	10.9	1678700	201210	4572600	1242900	22.73	1	P23528
VFSGLVSTGLK	2.2	1118900	95937	994800	1992900	20.77	1	P13639
LTLSALLDGK	2.6	1203600	380560	934510	1020500	6.51	1	P21796
WTEYGLTFTEK	2.4	940720	345740	693790	345580	6.88	1	P21796
STMDNPTTTQYASLMHSFILK	3.1	188970	210490	56077	136500	6.29	1	Q9NP97
QGFGELLQAVPLADSFR	2.4	695050	1655500	212320	103990	15.92	2	P27695
AVTPPMPLLTPATPGGLPPAAAVAAAAATAK	1.8	574800	875070	262800	241890	3.8	3	Q9UHX1
GTLGGLFSQILQGEDIVR	2.1	123020	207310	18245	134290	11.36	1	Q9BZZ5
APWIEQEGPEYWDR	2.6	901090	508170	918430	82854	25.28	1	P01889
ILFDTVDLC(+57.02)ATWEAMEK	3.6	158130	478060	151910	0	64	2	P52895
QLC(+57.02)EKEPLGNVLFSPIC(+57.02)LSTSLSLAQVGAK	0.7	185070	674640	65645	0	64	1	P36952
IHPVSTMVK	5.3	421970	18873	1198700	353070	63.52	2	P07195
TVAGQDAVIVLLGTR	2.4	67777	65917	52168	61471	1.75	1	P30043
FLETVELQISLK	2.4	962950	2661100	368290	304560	8.74	1	P62906
GADFLVTEVENGGSLGSK	2	1612400	1121400	3455300	883970	3.91	1	P14618
ELFQEMNIELVPPYMIASK	1.7	900610	2745600	432360	316430	25.42	2	O96019
ITITNDK	2.8	338180	44704	676390	274640	15.13	1	P11142
GGGGNFGPGPGSNFR	3.3	7006400	349480	4498200	2309800	59.71	1	P22626
NSLTSKDPDIK	2.7	127790	0	195710	11252	64	2	Q14974
GQSEDPGSLLSLFR	1.9	1262900	1311800	470260	336820	8.71	1	P08195
YLAEVAAGDDKK	3.1	476840	112550	1228600	251450	10.92	2	P63104
QSVENDIHGLRK	3.2	2162800	50896	1334800	288140	64	3	P05783
DFNHINVELSLLGK	1.9	999310	725330	163870	145380	20.38	2	P32969
SGRPTFFTAVFNTFTPAIK	6.7	57030	21677	0	93190	64	1	O15013
YGINTTDIFQTVDLWEGK	2.5	1475700	3899000	673070	601190	6.49	2	P37802
TAVETAVLLLR	2.1	452550	228010	417650	249550	4.01	1	P49368
YGEVEEMNVC(+57.02)DNLGDHLVGNVYVK	0.8	161980	499080	148840	0	64	1	P0DN76
AGDEFVEK	17.6	97067	53959	68999	245180	12.18	1	Q16836
TTHFVEGGDAGNREDQINR	2.6	2861000	79236	557960	164140	64	3	P18124
GGTSDVEVNEKK	14.3	84534	20531	38075	222740	10.85	1	P10809
HVGDLGNVTADKDGVADVSIEDSVISLSGDHC(+57.02)IIGR	1.5	1781500	5448800	851070	796280	64	3	P00441
EVATNSELVQSGK	10.4	1074200	40711	2982300	437550	64	1	Q04695
SMAVAAR	2.8	79847	5921.6	78927	234540	64	1	P35579
AMAAEAEASR	12.6	148130	1747.8	69160	12716	64	1	P27105
FFLQGIQLNTILPDAR	2.1	329750	788530	113160	229930	6.97	2	P11279
TAFDEAIAELDTLSEESYK	4.8	482000	1608700	194130	41852	38.44	2	P63104
GTLDPVEK	3.9	733570	7776.6	1206300	169820	64	1	P11142
IVEM(+15.99)STSK	6.5	10406	0	13968	10219	64	1	P63241
VGLTSEILNSFEHEFLSK	5	139890	406630	45384	87321	20.11	1	Q14181
FAIQDISVEETSAK	2	618990	275100	1453500	277520	5.28	1	O43707
LASSVLR	2.4	533680	8534.7	852940	164210	64	1	P84098
ITMIAEPLEK	6.3	480360	201210	285860	1242900	6.49	1	Q15029
LLETIDQLYLEYAK	2.2	398430	1036900	161640	122430	8.47	1	P12814
TMLEDLGMDDEGDDDPVPLPNVNAAILK	5.1	101190	228970	55495	0	64	1	P63208
LMQSLPQEVMEANLPSILLK	1.9	110520	324980	33443	27190	11.95	1	O75691
AKEILQEEEDLAEIVQLVGK	1.9	110520	324980	33443	27190	11.95	1	P38606
EGINIFLDGYVPTENLR	2.1	234790	430320	263160	162890	5.2	2	P61221
SVVSYWNLALIFHR	7.5	2726500	9088300	257610	127070	64	2	P49792
AALANLC(+57.02)IGDVITAIDGENTSNMTHLEAQNR	5.2	77568	185580	33679	67854	8.01	1	O00151
TVPPAVTGITFLSGGQSEEEASINLNAINK	1.8	6750300	20311000	2787600	2194000	11.88	2	P04075
AAVIGDVIR	5.9	1536300	891020	4547500	404600	15.05	1	Q9NR30
NLTALGLNLVASGGTAK	2.3	489420	1048600	510830	245330	6.86	1	P31939
GQVGGEINVEMDAAPGVDLSR	2	2287700	4492600	3872400	190850	23.54	2	Q04695
SVGDGETVEFDVVEGEKGAEAANVTGPGGVPVQGSK	1.6	1949500	2266300	915390	206960	21.31	2	P67809
MVVPVAALFTPLK	2.1	184990	276070	81769	120140	3.38	1	Q15436
GATYGKPVHHGVNQLK	2.1	1635900	6302.3	372760	514510	64	4	P61313
LNQYFQK	1.5	508900	12432	936450	109340	64	1	Q08211
SLESINSR	9.5	1012700	17791	2993800	75100	64	1	P62888
AVIVIQDIFGWQLPNTR	3	48628	124800	7693.5	43445	16.22	1	Q96DG6
VGDVYIPR	2.6	805240	20666	1293200	121790	64	1	Q01130
TVTAMDVVYALKR	2.4	44559000	2898600	6342700	5027900	56.57	2	P62805
NDQDTWDYTNPNLSGQGDPGSNPNKR	2.5	709190	263020	363410	115320	18.17	1	P14866
YTPSGQAGAAASESLFVSNHAY	2.5	4121700	6958900	5530600	1791800	3.88	2	P04075
TFAPEEISAMVLTK	2.6	3027800	1761800	1501400	1153200	6.67	2	P11021
YLTAEILELAGNAAR	15	47645	0	0	171270	64	1	P16104
TYYMSGGLQPVPIVFR	2.5	272340	422050	135330	121980	3.46	1	P11177
GTEDFIVESLDASFR	1.8	760410	1531200	398590	143260	10.69	2	P43307
FEPQVDTEAEDMISAVK	1.4	400460	440140	930980	75886	12.27	1	Q9UIG0
QETFDAGLQAFQQEGIANITALKDQLLAAK	2.9	37033	86908	0	0	64	1	Q13813
TIVITSHPGQIVK	3	393850	69815	862090	105120	12.35	2	P31689
LKYENEVALR	6.1	1877200	145020	6781700	385210	46.76	2	P13645
NPDDITNEEYGEFYK	2.9	1787900	475420	2342400	535730	7.99	1	P07900
ENQVLSVR	7.1	908600	18294	2130400	1235000	64	1	Q10589
GYFEYIEENKYSR	2.8	2380700	584990	1009000	570810	12.89	2	Q00839
FFEEVNDPAKNDALEMVEETTWQGLK	2.7	198010	205460	46215	67301	10.24	1	P49748
TINLYPLTNYTFGTK	10.3	465770	1021000	241300	187220	5.45	1	O43809
LATLGGSQALGLDGEIGNFEVGKEFDAILINPK	2.7	77871	251060	21694	0	64	1	Q9Y2T3
IGHPAPNFK	3.5	1187700	95854	2319800	833770	24.2	2	Q06830
SIAFHSAVSLDPIK	2.4	258670	341990	270870	143710	2.38	2	Q9Y3F4
ANLSLLR	1.8	418420	0	256190	233360	64	1	P23246
TLATDILMGVLK	2.1	188970	215890	31704	147350	11.38	1	O43143
TTQVPQFILDDFIQNDR	1.8	999830	942370	142120	250250	18.75	2	Q08211
SRLDQELK	2.4	774360	2748.9	255260	262280	64	2	P46781
AQAVSEDAGGNEGR	10.3	81440	6477.3	120560	51694	22.7	1	P55884
TLLEGEESR	3.4	1548000	55465	5544400	263640	64	1	P04264
QTSAILQQHYGGDIPASVAELVALPGVGPK	6.3	2569100	6910800	681510	2629900	64	1	P78549
GVGVFGDMAQDTGIPADIWR	7.5	283440	500030	75219	450650	6.65	2	P56192
INVYYNEATGGK	2.9	2927400	109770	3793600	918200	62.75	1	P68371
VEAVAHILGIR	5.6	1469000	467380	83473	5322600	64	1	P49327
LTNVAATSGDGYR	10.1	112130	0	41060	66369	64	1	Q32P28
TVLGTPEVLLGALPGAGGTQR	2.1	351900	477340	151700	94037	7.28	2	P40939
NDVLDSLGISPDLLPEDFVR	7.5	74063	263270	31123	0	64	2	Q9UBE0
LYTLVLTDPDAPSR	2.2	332290	189450	545560	289970	2.88	1	P30086
TVLIMELINNVAK	2.2	2574700	5159400	1124200	830640	6.21	2	P06576
HIYYITGETK	4	1070700	42162	1399400	891690	46.24	1	P07900
IGIEIIKR	2.8	1468900	82431	2546500	267780	36.14	2	P10809
LNSNTQVVLLSATMPSDVLEVTK	1.9	368280	0	0	662260	64	2	P60842
ALPGQLKPFETLLSQNQGGK	2.5	5615100	14680000	3616500	4087700	64	2	P09211
C(+57.02)PEALFQPSFLGMESC(+57.02)GIHETTFNSIMK	1.3	5020500	8279200	1692300	10110000	64	2	P60709
FDTIYQILLK	2.5	66289	55065	6407.5	27565	27.49	1	Q14258
VLEDSDLK	2.1	343850	0	531510	54383	64	1	P11021
KVGGTSDVEVNEK	2.6	61948	40711	40331	128870	3.4	1	P10809
TKPIWTR	6.8	2080700	0	1804700	4451900	64	2	P08238
DNIAC(+57.02)VILTFKEPFGTEGR	5	165240	506040	73353	55880	19.72	2	P11413
QFASQANVVGPWIQTK	2.4	405420	410720	715690	201080	3.56	1	O43707
MVSGFIPLKPTVK	3.4	934300	454300	1901400	1364400	64	2	P01023
RFDEILEASDGIMVAR	2	3001100	3815300	4167600	1557900	2.68	2	P14618
VYEGERPLTK	2.2	1057300	8747.8	868220	311560	64	2	P11021
IFSPNVVNLTLVDLPGMTK	2.2	64456	162300	16981	29851	9.56	2	O00429
SISDKQQWDAAIYFMEEALQAR	10.2	383160	1274400	114920	90936	24.32	1	O60313
MKSDSFAPK	10.4	20134	0	34176	15130	64	1	Q9Y2W1
VEGTEPTTAFNLFVGNLNFNK	2.5	3786400	6865100	839790	1214600	8.17	2	P19338
GGPGGELPR	11.4	294110	0	101390	994270	64	1	Q04637
VDLGGFAGLFDLK	2.1	119210	232350	25586	77293	9.08	1	P22102
AAISSGKLN	1.9	132040	63761	82688	361870	18.24	1	Q12873
YLTVATVFR	2.4	173010	68244	181620	199610	3.55	1	Q13509
LALSPNAQVLALASGSSIHLYNTR	0.3	112040	0	0	209950	64	1	Q9Y4P3
LTIAEER	3	884930	2187.8	462790	69580	64	1	P62701
IVVVTAGVR	4.2	1565400	262850	3831700	1275700	14.58	1	P07195
TVSLGAGAKDELHIVEAEAMNYEGSPIK	1.7	16481000	11672000	2820400	3530700	16.98	2	P06748
FLQEEAEK	9.5	178620	35150	139210	263120	7.88	1	Q15149
ETMQSLNDR	2.4	562810	0	381060	111580	64	1	P05783
MFLQYYLNEQGDRVYTLK	5.6	1069600	2675000	499020	813770	9.21	1	Q9NPE3
GNKPWISLPR	1.7	2368500	0	398090	3124100	64	2	P62701
ITITNDKGR	6.1	332300	776.19	856470	281000	64	2	P11142
AFITNIPFDVK	1.5	893390	160080	223580	464180	17.03	1	P52272
EGSALSHVR	14.8	28789	25333	23304	47021	2.41	1	Q3MHD2
TLGLYGKDQQEAALVDMVNDGVEDLR	7.7	1103200	3351400	605430	124860	26.84	1	P09211
AVFVDLEPTVIDEIR	2	1280100	2860500	844270	160170	17.86	2	P68366
IIVDELKQEVISTSSK	2	3015000	767180	1623900	1020700	11.27	2	P63244
RLTVNEAVK	10.1	62337	4746.6	122660	33483	25.84	1	Q15149
SVGYPHPDWIWR	7.5	807610	1216300	833200	778190	3.02	2	Q9Y639
KVLILGSGGLSIGQAGEFDYSGSQAIK	3.1	70624	123220	0	90006	64	1	P27708
VGTDEAC(+57.02)LIEILASR	7.7	401920	937470	327960	273070	13.55	1	P50995
LLIHQSLAGGIIGVK	2	4543600	1766500	1435400	10264000	7.15	2	P61978
QMQLENVSVALEFLDRESIK	2.1	431190	1071000	235800	197450	5.42	2	P21333
ITEFC(+57.02)HR	6.9	148110	2192.3	480180	68227	64	2	P07237
TATFAQALQFVPETQVSLLDNGLR	3.7	472110	744810	83442	125840	11.2	2	P31930
QVEVDAQQC(+57.02)MLEILDTAGTEQFTAMR	1.5	40419	132150	20972	8557.2	64	1	P61224
GTANRPMGAGEALR	2.7	11130	3904.3	0	0	64	1	Q12906
TDLEKDIISDTSGDFRK	3.3	5539300	2411300	3924500	671490	22.56	3	P07355
LKLGEIVTTIPTIGFNVETVEYK	2.5	58105	115660	19805	86549	11.11	1	P84077
APTIEQMKDVYIVQDLMETDLYK	7.1	412250	1340100	144740	39091	34.28	1	P28482
KLELSDNIISGGLEVLAEK	2	511770	1258000	187630	321510	6.71	2	Q9BTT0
DYSLDEFEANK	11.9	252340	0	823630	53745	64	1	Q9NZM1
VSELKEELKK	1.9	134130	0	162860	18125	64	2	Q00839
DNNELLLFILK	8.1	71876	48150	0	45718	64	1	P49736
QMYITYVR	1.6	246060	70776	381510	439150	6.2	1	Q9Y3T9
LEQIAAEQK	12.1	104680	0	23783	45711	64	1	Q9UKM9
YEGERPLTK	10.9	99779	18081	38193	139820	11.23	1	P11021
SVPHLQK	2.4	291970	5554.3	907790	244490	64	1	P07355
DLNPDVNVFQR	8.3	606190	269970	1537100	541800	20.25	1	Q93050
ITITNDQNR	4.8	897050	8627.1	856230	37532	64	1	P11021
FLEEATR	2.3	325250	0	292780	64804	64	1	P31327
ATLNAFLYR	2.4	220080	68288	358970	130770	5.26	1	Q9NVI7
NLIDAGVDALR	2.1	325680	112540	495550	232140	4.4	1	P12268
LPPLPVTPGMEGAGVVIAVGEGVSDRK	2.1	65216	110490	22234	0	64	1	Q99536
EQISDIDDAVR	1.8	531610	110260	993390	65434	15.18	1	P53999
VIAVYDLGGGTFDISILEIQK	9.2	86516	179130	8886.4	56446	20.16	2	P38646
HMLPSGFRK	3.1	774470	0	148800	95739	64	2	P62910
VQTEVLQK	9.3	927050	18294	2130400	1235000	64	1	Q99848
SSSSGSVGESSSKGP	2.7	202390	25358	657500	126720	64	1	P13645
ALLELQLEPEELYQTFQR	2.1	2391500	7176800	894510	1093400	17.89	2	P13639
ISSSSFSR	3.8	2409200	29801	1959300	1022500	64	1	P05787
RYDDPEVQK	2.3	237830	0	199310	19878	64	1	P38646
INYTEGR	6	133200	10924	379580	55243	34.75	1	P06744
IHGVGFK	1.7	202740	0	2623.7	83011	64	1	P62899
HFNAPSHIR	2.2	1419900	7300.2	473590	366290	64	2	P61254
SMTEAEQQQLIDDHFLFDKPVSPLLLASGMAR	2.1	381880	131940	22527	291130	48.03	2	P12277
LLC(+57.02)GLLAER	3	1545600	705110	2861500	2348200	10.69	1	P14174
S(+42.01)LIC(+57.02)SISNEVPEHPC(+57.02)VSPVSNHVYER	2	382820	1006400	251010	273880	64	1	Q9UMS4
NGYGFINR	4.1	204040	53412	514240	201320	10.9	1	P67809
SDGIYIINLK	2.5	225460	79848	291050	236300	3.69	1	P08865
FITHAPPGEFNEVFNDVR	1.9	654320	1504700	513570	180650	8.33	1	P52907
GENSWFSTQVDTVATK	2.7	1527400	404770	2019300	345100	9.68	1	P08195
AVPVWDVLASGYVSR	2.6	244000	391480	197140	60764	6.44	2	P58107
EAKPDELMDSK	5	370230	20531	117520	228910	54.26	2	Q9P0L0
TGYTLDVTTGQR	2.3	1311400	606240	1078100	315690	10.28	1	O60506
HILLAVANDEELNQLLK	2.3	840540	1539300	212240	89838	17.13	2	O75367
A(+42.01)HITINQYLQQVYEAIDSR	1.6	200850	588200	92131	18678	31.49	2	Q5JVF3
VLDELTLAR	2.8	1773600	179190	4162500	232710	23.23	1	Q04695
VLALPEPSPAAPTLR	2.8	461200	288820	394090	121750	8.54	1	Q15149
VEQATKPSFESGR	1.8	375580	0	180580	75211	64	2	P38159
C(+57.02)EM(+15.99)EQQNQEYK	2.4	18716	3638.9	71224	0	64	1	Q04695
YSLEPVAVELK	3.1	159350	92061	254360	118460	2.76	1	P00558
TDPSILGGMIVR	5.6	1200600	1602000	2470800	87093	28.37	1	P48047
QMAEIAVNAVLTVADMER	2	289070	726510	217910	108350	7.02	2	P48643
VLGATLLPDLIQK	2.2	177620	354250	166900	69300	5.11	1	P55786
LFIGGLSFETTDESLR	3.1	6718000	7841700	1710900	5141400	7.12	2	P09651
ATMQNLNDR	2.9	588180	4972.9	1552600	93198	64	1	Q04695
GAVGALLVYDIAK	1.6	362350	445270	296940	118070	4.99	1	P62491
LQAALDDEEAGGRPAMEPGNGSLDLGGDSAGR	2.8	1817400	755370	620280	263020	21.41	2	Q00839
LLDAVDTYIPVPAR	4.5	1148800	676120	741300	369020	7.61	2	P49411
SDALETLGFLNHYQMK	2.2	1232300	739330	234920	359230	15.31	2	P14866
KTEISEMNR	6.6	45730	20351	57376	93454	7.96	1	P05787
EVYPEAR	3.6	138380	0	160910	186870	64	1	O00422
TTGIVM(+15.99)DSGDGVTHTVPIYEGYALPHAILR	2.7	9149200	30779000	2377600	1436200	21.43	2	P60709
TLVLLMGK	2	956690	181810	1979700	1228000	10.89	1	P07737
VLALSVETDYTFPLAEK	1.8	2844600	5147800	1333100	774300	6.65	2	P05388
GIFNGFSVTLK	1.9	417550	256570	117080	947130	8.09	1	Q00325
GELAIKDANAK	6.9	386110	0	251460	52693	64	2	P05787
YIFTMLSSLAR	1.1	273230	0	0	622730	64	1	P11388
QVTQEEGQQLAR	8.6	573710	29639	2097000	134710	64	1	P62070
MAVTFIGNSTAIQELFK	2	4157800	5055800	818460	3832300	8.46	2	P07437
VNFLPEIITLSK	1.4	36355	0	0	49455	64	1	Q14204
EQFLDGDGWTSR	2.9	1068200	78126	1340200	335870	32.24	1	P27797
QLLQANPILEAFGNAK	1.8	1257900	3411100	957020	473300	17.94	2	P35579
AYGPGIEPTGNMVK	2.9	507770	81107	1424800	244530	17.57	1	P21333
FFADLLDYIK	3	83039	178970	20256	85684	8.84	1	P00492
DISEASVFDAYVLPK	2.5	1324300	502840	282200	198360	21.75	1	P62854
GLESDVAELR	6.7	365150	25582	1113000	115700	43.51	1	Q03252
TPC(+57.02)EEILVK	6.7	365150	25582	1113000	115700	43.51	1	P21333
SPFTVGVAAPLDLSK	1.4	361250	496120	416850	193000	2.57	1	O75369
MVNHFIAEFK	2.6	1809800	239830	2352900	1771900	11.99	2	P11142
M(+42.01)DLAAAAEPGAGSQHLEVRDEVAEK	3.1	311460	182450	178800	52928	15.71	1	Q14566
ATVLNYLPK	2.6	476340	173500	1394100	337760	64	1	P01023
SYVTTSTR	2.7	596910	6287.2	1087200	240330	64	1	P08670
YVATLGVEVHPLVFHTNR	2.4	1151800	1546700	722280	1194500	2.14	3	P62826
VQDDEVGDGTTSVTVLAAELLR	3.8	1148400	3125200	559350	117160	26.68	2	P78371
LSEGVTISYK	2.2	171660	31163	174880	49003	13.85	1	P05556
VMDEVEK	7.9	54037	0	99902	15331	64	1	Q9Y383
ELGGAIDFGAAYVLEQASSHIGNSTQATVR	1.2	222660	499360	71217	83725	7.01	1	Q6DD88
ALPILEELLR	1.8	1176200	3508400	910550	224680	57.19	1	Q6ZXV5
AYADFYR	2.6	163810	0	118020	36519	64	1	P09669
GFGFVQFK	12.6	224950	0	266920	472400	64	1	Q9NW13
FQESEERPK	7.7	56661	0	135310	21981	64	2	P34932
GHYTEGAELVDSVLDVVRK	2.5	9215600	14890000	3008400	193570	64	3	P07437
GSYGDLGGPIITTQVTIPK	2.1	3252300	3921400	2463300	968890	5.84	2	P61978
QIVWNGPVGVFEWEAFAR	1.8	567140	549330	121400	640280	7.89	2	P00558
NTGIIC(+57.02)TIGPASR	9	2531700	650800	7163000	2225100	64	1	P14618
S(+42.01)GALDVLQMKEEDVLK	2.6	2495700	1223600	1369300	621520	10.89	1	P08865
VLPAQATEYAFAFIQVPQDDDARTDAVDSVVR	2.6	661990	1082800	150340	168490	8.29	2	Q7KZF4
TVIDYNGER	3.2	321020	3363	646880	65880	64	1	P07237
FVSISDLLVPK	1.5	537190	1069100	423610	476260	5.95	1	P50395
RGEEGHDPKEPEQLR	11.8	271360	0	86752	51270	64	2	P51991
VTGSLSSAK	3.5	55744	18789	49305	142650	11.67	1	P39748
VHIGQVIMSIR	2.4	1362600	168950	371140	1257600	21.62	2	P27635
LNLAFVANLFNK	2.9	165310	161450	12883	437050	33.92	1	P13797
AVENPTATEIQDVC(+57.02)SAVGLNVFLEK	12.2	36874	114800	0	23290	64	1	P09132
IGGDAATTVNNSTPDFGFGGQK	17.5	115630	0	0	67420	64	1	Q92945
AEGPEVDVNLPK	2.7	585850	65969	1054000	161490	16.1	1	Q09666
LVQSPNSYFMDVK	2	1150900	85746	306910	403550	44.41	1	P42677
LKDLEALLNSK	2.7	1081100	381800	1023500	637370	5.98	2	P02545
HIVVYHR	0.9	2385.3	0	4169.2	5372.1	64	1	P50416
MRAEDGENYDIKK	2.5	624300	59841	137550	355820	32.49	3	O75347
FLPAVSDENSK	4.2	389050	46564	1262300	141960	27.11	1	P46087
QVLDNLTM(+15.99)EK	4.2	389050	46564	1262300	141960	27.11	1	P35527
WAAVVVPSGEEQR	2.2	548630	94666	1160900	84250	13.78	1	P01889
SRGFGFVTYATVEEVDAAMNARPHK	2.9	1551100	2280600	1239300	2367800	7.48	1	P09651
VNPC(+57.02)IGGVILFHETLYQK	6.2	1397100	2992300	991380	1348100	11.66	2	P04075
LSDFNDITNMLLLK	1.6	312980	495430	88410	56506	10.82	1	P78527
WSGPLSLQEVDEQPQHPLHVTYAGAAVDELGK	2.1	1414500	3737100	557270	294240	12.7	2	P30086
FEDGTISFLDVIALK	5.5	469140	44993	623370	1198000	64	1	Q96EN8
NFLVFQGAVESIAMK	11.3	230240	502840	282200	21278	23.63	1	Q14683
LPLPSPALEYTLGSR	4.9	3616800	10166000	3120500	4222.2	64	1	Q8IU81
QDVDNASLAR	2.1	1005200	16196	1629600	160370	64	1	P08670
KREELSNVLAAMR	2.1	2016300	188230	562500	747990	34.89	3	Q9Y3U8
IQKGDSKKDDEENYLDLFSHK	6.4	391130	415920	621490	160420	3.87	1	Q07666
LQAEEVAQQK	11.7	346760	144860	142400	813720	5.71	1	Q15149
VSLDVNHFAPDELTVK	1.8	2697800	1297500	2589000	615810	10.21	2	P04792
LLVPTQFVGAIIGK	2.9	475990	368450	65383	476090	15.2	2	O00425
VINEEYK	4.5	463800	3695.4	1109600	385060	64	1	Q16576
TYTGLSGLALLGTIISAYR	2	32002	124800	0	0	64	1	Q9UKV5
SPSGPSGSLENGTK	3.6	16146	14412	0	27158	64	1	Q14134
TVTELVTK	18	134030	0	274430	70596	64	1	Q8IY81
LLDAQLSTGGIVDPSK	2.4	392900	201010	469620	110470	7.16	1	Q15149
LLADQAEAR	3.5	1126000	6323.7	559010	104180	64	1	P84098
RKPDTIEVQQMK	2.5	500690	14619	669980	265490	64	2	P26038
AQYEEIAQR	3	445950	20351	1574600	93454	64	1	P35908
NTPVYVSSPTWENHNAVFSAAGFK	0.5	160150	440050	97890	102660	64	1	P17174
DAFVAIVQSVK	1.7	109000	0	86039	42618	64	1	P08133
FVHDNYVIR	7.5	562610	25619	694700	138090	54.34	2	P31327
IGPYQPNVPVGIDYVIPK	4.6	1343700	1293300	393440	276840	12.32	2	P43243
TNFFVNGLLDLVK	8.9	66256	164740	18430	52980	8.94	1	Q9BRZ2
FYHDWNDKEIEVLNK	3.8	167310	123530	247030	161490	2	1	Q9NTK5
AFSYYGPLR	3.1	769740	70776	381510	439150	30.91	1	Q16629
TSNHLLGPKPFPLDR	1.6	110190	120910	260520	46369	20.08	1	O43913
SQVVAGTNYFIK	2.3	334430	88560	803100	257560	9.07	1	P04080
SAAPGSLGYQWLSDGSGVFEIAEASGVR	10.3	270950	843890	13812	82418	61.1	1	Q12931
AIMTYVSSFYHAFSGAQK	1.5	3751400	2581000	823490	11182000	26.7	2	O43707
HPFIVNHPK	3.4	157230	0	454430	98230	64	1	P55265
LDIDSPPITAR	3.3	2845600	472810	7116600	1409500	15.05	1	P14618
LYDNLLEQNLIR	2.4	143620	198450	108440	90483	2.19	1	O00231
LNDGHFMPVLGFGTYAPAEVPK	3.1	928930	2702800	610750	348260	50.17	2	P52895
GLQAQIASSGLTVEVDAPK	2.4	3334400	6221000	2258900	1462200	4.25	2	P05783
IEDVTPIPSDSTR	2.6	1425700	31865	1209700	248430	64	1	P62263
LTAEEMDER	7.2	75084	0	127010	111580	64	1	P46940
M(+42.01)DEMATTQISKDELDELKEAFAK	0.7	111500	177880	53839	37644	4.73	1	P13797
QLFSSLFSGILK	2.4	248050	149320	10886	567690	52.15	1	P78527
HVISYSLSPFEQR	8.5	946180	1113600	2042700	58939	34.66	2	O14949
QHFIQEEQILEIDC(+57.02)TMLTPEPVLK	4.6	76011	197410	36674	60660	21.22	1	P41250
AAEAAAAPAESAAPAAGEEPSKEEGEPK	2.7	3935100	653880	3211800	186410	62.7	3	P80723
SEAANGNLDFVLSFLK	3.5	240630	468390	48145	114510	9.73	2	P42704
SLDM(+15.99)DSIIAEVK	3.3	981790	2741800	553040	98573	27.82	1	P05787
KM(+15.99)AVTFIGNSTAIQELFK	9.6	95173	234170	86675	21529	10.88	1	P07437
IYITLTGVHQVPTENVQVHFTER	2.2	453280	1111400	244080	457630	64	2	Q9HB71
GLFIIDDKGILR	2.5	1252400	442830	377130	355120	10.8	2	Q06830
VNEYVDAR	8.4	138580	23993	41508	362260	15.1	1	Q96T88
GLGTDEDSLIEIIC(+57.02)SR	4.1	3182100	8748400	2424000	1552700	64	2	P07355
DVMQQQLAEYQELLDVK	4.7	139550	406630	45384	87321	21.57	1	Q03252
VIISAPSADAPMFVMGVNHEKYDNSLK	2.6	2668700	2791400	1696600	1430800	3.32	2	P04406
QTASVTLQAIAAQNAAVQAVNAHSNILK	1.5	547380	904200	199050	132370	7.21	1	Q16891
FDSDAASQR	2.9	83330	0	245100	6996.7	64	1	P04439
MEESFSSK	11	93548	0	106490	33556	64	1	P42167
NVIGLQMGTNR	2.1	897110	48808	2249600	879520	46.09	1	P37802
LLLLESVSGLLQPR	3.3	214840	213610	12187	263360	30.38	2	Q8IZL8
ANGTTVHVGIHPSK	4.9	325930	0	107250	88534	64	3	P61254
M(+42.01)MC(+57.02)GAPSATQPATAETQHIADQVR	1.7	188220	191040	407170	154670	64	1	P04080
EFGTNIK	8.8	106160	0	201440	22257	64	1	P14625
IIQEQDAGLDALSSIISR	11.8	377720	947360	136020	306360	7.82	2	Q9UNK0
LWEPLVEEPPADQWKWPI	9.4	102170	256960	0	91446	64	1	Q16718
LRSEIDNVKK	5.4	683490	22139	2307300	176900	64	2	P04264
FADLSEAANR	3.7	1239100	66006	3656900	780420	55.4	1	P08670
MGPGIDR	6.6	158250	0	80451	71106	64	1	P52272
LNGQVLVFTLPLTDQVSVIK	1.7	150380	381120	50048	100850	7.62	2	Q15459
SVVEFLQGYIGVPHGGFPEPFR	10.4	117120	171590	29894	36624	7.71	1	P11498
AGPGTLSVTIEGPSK	2.4	195750	46203	428590	94021	9.28	1	O75369
MLQFVLPVATQIQQEVIK	5.7	171480	430830	62424	107630	6.9	2	Q99622
LEAALGEAKK	4.5	222230	4746.6	263640	37479	64	2	P02545
MDATANDVPSPYEVR	2.6	943760	115010	1542300	184980	16.8	1	P30101
YGQLSEK	3	25413	0	59767	31314	64	1	O14737
VILHLKEDQTEYLEER	2.6	3620900	2592100	3311600	2519600	2.41	3	P08238
VVDFIDEGVNIGLEVK	2.5	398070	1021000	241300	82484	12.38	1	P34897
PAAQETK	9.4	167370	0	490050	36128	64	1	P80723
SSLNPILFR	6.6	347970	29832	86642	229540	35.06	1	P39656
YGPIADVSIVYDQQSR	2.1	648010	251870	373670	214280	8.18	1	P62995
ISISTSGGSFR	8.5	286170	108120	734240	163760	6.79	1	P13647
VGGTSDVEVNEKKDR	4.4	326670	0	321560	44200	64	3	P10809
LGAPALTSR	14	275620	21379	802690	112510	37.55	1	P34897
SIVDYKPNLDLLEQQHQLIQEALIFDNK	2.5	589610	835080	78520	271330	14.95	2	O43707
AFGPGLQGGSAGSPAR	2.8	757860	93291	2182900	341050	23.4	1	P21333
SFPFVSK	1.6	220770	0	136350	152100	64	1	P31327
AAEDDEDDDVDTK	7.9	115370	0	275460	19079	64	1	P06454
QGTPLIAFSLLPHEQK	8	1435200	2410600	647040	2126700	4.33	1	Q2NL82
AVLHVALR	2.2	226120	0	606250	215750	64	1	P06744
SISISVAGGGGGFGAAGGFGGR	2.8	1545700	1912300	3250500	923990	33.83	2	P35908
EVDPLVYNMSHEDPGNVSYSEIGGLSEQIR	2.1	216030	483010	79309	40744	11.85	1	P62333
AKC(+57.02)ELSSSVQTDINLPYLTMDSSGPK	3.9	694290	1495700	414880	192980	7.75	1	P38646
M(+42.01)EVMNLMEQPIK	5.8	39228	124360	15379	0	64	1	P14923
LSGEAFDWLLGEIESK	15	311690	1206100	0	0	64	1	P24928
ISATSIFFESMPYK	2.3	536700	560200	239650	295360	4.39	1	P34897
NDEELNKLLGK	2.4	14888000	444890	7478500	1404400	64	2	Q99878
FEDENFILK	2.6	880440	277580	2039000	144570	14.1	1	P62937
HFTEDIQTR	12.3	65726	0	78698	0	64	1	Q96SB4
LSPSPTSQR	2.5	260430	0	329150	125800	64	1	P02545
TGDEKDVSV	13.2	176950	41889	171810	370660	8.85	1	Q16543
VGINYQPPTVVPGGDLAK	2.7	15013000	9101200	12449000	5878800	5.55	2	Q71U36
GLFTGLTPR	13.3	143010	0	71529	247050	64	1	Q9Y6C9
NPYYGGESASITPLEDLYKR	6.4	294540	440580	532050	33979	15.66	1	P50395
DILEIGAQWSILR	4	86365	241190	50390	34699	12.58	1	P48556
C(+57.02)DSSPDSAEDVRK	4.9	1769500	59159	6859500	159040	64	2	P02765
LQVVDQPLPVR	2.9	364920	71133	365780	134560	12.49	1	P49327
IEISELNR	3.1	1956100	139500	6758500	600210	48.45	1	P04264
VLVQNAAGSQEK	2	42381	0	137590	0	64	1	Q9Y490
NLPTIFVYLEGDIK	2.8	41036	140170	9858	0	64	1	Q9H2J4
TGLFTPDLAFEAIVK	2.8	41036	140170	9858	0	64	1	P50570
DANSVTSSLR	14.4	70257	63396	97851	83308	2.68	1	Q9Y6E2
YLDLILNDFVR	2.2	177040	303460	44607	130000	6.8	1	Q15046
KDEDLFR	3.7	366470	13345	878140	210420	64	1	O75531
LREDLER	2.8	721790	3746.2	527770	51880	64	2	P62269
APMFSWPR	2.8	696130	10608	374920	804120	64	1	P31327
VTLATLK	3	2375300	25229	2202300	1452400	64	1	P06748
TYEDIDKR	15.3	108500	4974.1	189800	175650	38.16	2	P82650
KDDEVQVVR	16.6	402660	0	485740	24375	64	2	P61254
VMEHFIK	3.2	374480	3863.5	284550	119010	64	1	P11021
DLINLAK	11.5	216450	0	256190	233360	64	1	P22087
IITLAGPTNAIFK	2.9	1259500	687320	424050	1666000	5.33	1	Q15366
SVNELIYK	2	805040	0	311640	173400	64	1	P18124
EEGPYEVEVTYDGVPVPGSPFPLEAVAPTKPSK	1.6	2180300	7613400	761180	46287	64	2	P21333
VADISGDTQK	3.3	190250	55465	240630	263640	4.75	1	Q7KZF4
TGVAVNKPAEFTVDAK	2.2	821220	219210	2334200	263010	10.65	2	P21333
VAEDEAEAAAAAK	3.5	366960	2217.7	275700	23839	64	1	P08195
SSAVDPEPQVK	18.8	54903	7792.9	47399	27410	17.58	1	Q5SSJ5
IGNTGGMLDNILASK	1.4	228040	136400	379870	199210	2.78	1	P53396
SVTEQGAELSNEER	2.6	623200	37412	1542700	96119	41.24	1	P63104
QAAETTLK	4.2	154050	48948	251210	316040	64	1	Q702N8
A(+42.01)SALEQFVNSVR	2.2	156720	377220	116390	53621	7.03	1	Q9UNS2
DGQILPVPNVVVR	2.3	96490	16062	42541	50314	17.25	1	Q9P258
GTQGVVTNFEIFR	2.6	203390	154760	208690	222210	1.47	1	P55884
YVEPIEDVPC(+57.02)GNIVGLVGVDQFLVK	2	623820	1556000	0	921660	64	2	P13639
VQAQGPGLK	9.5	63947	2349.6	119920	26593	51.04	1	O75369
FTVLLMPNGPMR	2	334140	50026	98719	460560	14.54	1	Q9UQ80
LIADLGSTSITNLGFR	3.9	280340	601290	189780	167320	3.69	1	Q92520
GPNGYGFHLHGEK	13.9	70703	15492	21627	212100	13.69	1	O14745
FVNVVPTFGK	2.4	1408100	143120	504280	760820	29.51	1	P62861
LNFAVASR	2.7	446950	15620	798120	424160	51.09	1	P30101
LQGEIAHVK	4.8	206170	0	605560	182690	64	2	P35908
SQYEVMAEQNRK	3.2	1298500	111290	2329300	1230200	20.93	2	P08727
VVISLQLTAEK	3.1	587670	1395300	434620	458300	22.33	1	P30041
IHGFTVNQVTSVPELFLTAVK	12	323490	1103100	120140	0	64	1	Q5JRX3
DYPDFSPSVDAEAIQK	2.6	273040	252430	643340	61023	10.54	1	P12429
LLEDGEDFNLGDALDSSNSMQTIQK	1.7	5125800	4267200	1498300	796640	17.5	2	P05783
DYDAMGSQTK	10.9	38170	0	54446	51164	64	1	Q9Y230
AQYEEIANR	5.9	320060	66006	385930	780420	16.3	1	P13647
TIQFVDWC(+57.02)PTGFK	1.8	809690	1350600	638650	1215800	40.07	1	Q71U36
FSLFAGGMLR	2.4	254670	128260	110370	571630	5.18	1	Q9BVK6
FESPEVAER	6.3	388440	5137.2	174690	411100	64	1	P52272
LAGGYENVPTVDIHMK	4.4	193520	197360	192830	92951	3.13	1	O60568
VLELVSITANK	3.1	292180	69740	321190	200480	8.28	1	P34897
APLATGEDDDDEVPDLVENFDEASKNEAN	1.8	784660	1582800	724350	71738	22.06	1	P20290
FRC(+57.02)PEALFQPSFLGMESC(+57.02)GIHETTFNSIMK	1.4	391360	899280	194680	471480	64	2	P60709
RWLPAGDALLQMITIHLPSPVTAQK	2	1626600	234310	30655	5713500	64	2	P13639
HMLPSGFR	6.5	373460	20173	185060	338630	47.09	1	P62910
SVLAETEGILQK	10.5	1892500	709180	799730	5895500	35.64	1	Q86UP2
DHFEEAMR	1.9	105050	0	170130	0	64	1	P55072
TVWDWELMNDIKPIWQRPSK	1.3	680990	0	0	507300	64	2	P14625
EFNGQHFILEEAITGDFALVK	2.4	195340	493630	60724	65119	8.13	1	P55809
SISLYYTGEK	2.6	1812300	43853	1310000	609470	64	1	P19338
AEGSDVANAVLDGADC(+57.02)IMLSGETAK	3.6	2959800	7278900	3552900	1004100	64	2	P14618
EGFQLLLNNK	9	762880	668590	1330800	996450	23.91	1	Q96TC7
SALTVQFVQGIFVEK	2.5	579320	1220800	218790	207140	5.89	2	P61224
QAPQTIHLPSGEILDVFDAAER	2.5	574140	1958700	276030	13995	64	1	P21399
ILTGGADK	7.3	148700	2126	245140	314940	64	1	Q9UMS4
IWHYTGSILHK	1.5	52447	0	0	166320	64	1	Q9BY44
KLAVNMVPFPR	2.2	3376800	291490	1403500	10156000	34.84	2	P07437
TATESFASDPILYRPVAVALDTKGPEIR	2.8	2201900	4642500	1029500	206820	22.45	2	P14618
EANQQQQFNR	18.5	76633	20531	53791	222740	23.53	1	Q13813
IFAPNHVVAK	3	1024300	4590.4	359280	268260	64	2	Q02543
YKPESEELTAER	3.3	581970	10451	818880	82843	64	2	P07237
KQGGLGPMNIPLVSDPK	2.6	848390	604920	1029600	1253300	2.48	2	Q06830
RGDINLLMLGDPGTAK	3.6	370080	545480	484780	139440	3.91	1	P33992
TPGPGAQSALR	2.5	1107400	16832	650540	288530	64	1	P62263
VFGPGVER	9.6	164890	63761	156380	361870	5.68	1	O75369
YLQDNPASGEK	10.1	105630	5017.6	248510	118790	49.53	1	Q16850
LYSSSDDVIELTPSNFNR	2	1012200	872360	654850	349800	6.21	2	Q15084
EVSTYIK	2.6	987180	8560.8	1233600	994270	64	1	P68104
RPGHDDGQRPSGGAAAAPR	3.1	7149.7	0	12476	0	64	1	Q8N726
KIGDTSVSYK	10.4	31514	12235	35552	16285	5.07	1	P20700
SMLAALIAAQATALNR	5	266390	691950	226790	107510	17.61	1	Q8IY67
AGTLSITEFADMLSGNAGGFR	3.6	391530	549430	81856	82172	10.42	2	Q15149
VVIIGAGKPAAVVLQTK	2	1005300	310470	678030	2224700	7.17	2	Q14697
NAGAVIGK	2.7	76146	0	170770	94384	64	1	P61978
FWEVISDEHGIDPTGSYHGDSDLQLER	1.7	1286200	2686400	623720	1587800	10.88	1	Q13885
SLSPDEERLVSDIIDPVALEIPLSK	8.7	67891	136060	33270	91897	13.17	1	Q5UIP0
DNGIRPSSLEQMAK	4.4	67501	17375	138650	19710	7.98	1	P55084
TYAIC(+57.02)GAIR	2.7	322580	25947	837440	426920	64	1	P63220
LEVQATDREENK	14.9	161930	0	216270	9563.9	64	2	P11387
TLDTIQLAFK	4.3	452440	126120	482400	1021100	8.1	1	Q8NF37
ALTQTGGPHVK	2.5	285250	4612.9	896650	96891	64	2	P21333
LKDDEVAQLKK	3.1	681140	26564	1389100	170900	52.29	2	P07195
LVVFPTDDISLK	4.7	405940	263800	50902	750880	14.75	1	P32004
LLEPVLLLGK	2.7	1308100	327050	259480	345060	16.58	1	P62249
ITFTGEADQAPGVEPGDIVLLLQEK	2.9	126370	376540	30028	0	64	1	O60884
GQVPPLVTTNFLVK	2.2	67611	65917	51507	61471	1.78	1	P53992
IYGESADAVKK	2.7	449330	4857.7	1394400	229810	64	2	P51114
ASASGSGAQVGGPISSGSSASSVTVTR	2.8	652580	144900	769650	343130	9.33	2	P02545
EHMQPTHPIR	6.7	99105	2217.7	226260	53754	64	2	P61981
QPAENVNQYLTDPK	2.4	154950	29356	340320	103880	11.59	1	P22314
VFEVSLADLQNDEVAFR	2.3	1197400	1846800	346810	336270	6.72	2	P61247
LLEAAAQSTK	1.6	155940	0	220110	28503	64	1	Q15149
LTPTEVKDYLAAIA	9.3	233110	645080	183860	71082	19.89	1	P25787
TDYWLQPEIIVK	9.3	233110	645080	183860	71082	19.89	1	O60870
AGNNMLLVGVHGPR	3.2	523940	132160	1195300	494060	9.04	2	P21333
ILGPQGNTIK	3.4	238490	26102	308020	167550	17.33	1	Q07666
TSYAQHQQVR	1.3	7462	0	1795.4	26447	64	1	P61247
KYIVAYHAAGK	8.5	21289	0	61399	12383	64	1	Q96PZ0
LAQDPYR	4.6	111620	0	241080	88758	64	1	P18583
AQIHDLVLVGGSTR	2.4	804380	112080	638410	645720	16.25	2	P0DMV8
YSTSGSSGLTTGK	2.7	62874	2217.7	46244	23839	64	1	Q16891
IEEELGSK	3.1	1879200	43239	5805400	229380	64	1	P06733
FGIEPNAELIYEVTLK	1.7	165870	502060	99473	21035	23.87	1	Q13451
EAAEALGAAK	19	228030	2671.1	586110	24990	64	1	P05187
GVAM(+15.99)NPVEHPFGGGNHQHIGKPSTIR	3.6	3042900	316620	0	1836900	64	4	P62917
GPYESGSGHSSGLGHR	9.4	89842	20855	271980	50307	16.77	3	Q86YZ3
LETVGSIFSR	6.2	368620	165960	1048400	31871	32.89	1	Q9Y3D9
APGFGDNR	2.7	224530	0	517320	106660	64	1	P10809
VNTPTTTVYR	2.7	66307	6569.2	158750	74846	24.17	1	P26639
LANQFAIYKPVTDFFLQLVDAGK	3.8	107320	0	0	119890	64	2	P42704
SVDLQTR	12.8	53847	0	167570	18168	64	1	Q8NBJ4
SSEQILATLK	9.8	611410	99166	1562500	261770	15.76	1	Q9UMS4
AAESLADPTEYENLFPGLK	1.5	218980	440490	110160	61347	7.18	1	P35606
GGVVGIK	4.4	233180	76860	602250	189100	9.34	1	P04075
GAGIGGLGITVEGPSESK	2.7	161560	86226	284410	98563	3.3	1	O75369
DAGYEFDIC(+57.02)FTSVQK	6.5	660450	1457500	722550	455350	64	1	P18669
FLPLFDR	3.1	1105800	369430	1822800	387040	4.99	1	P61604
ELSDIAHR	3	548290	17541	1426400	160310	64	2	P04075
AVRPGYPK	12.2	58186	0	87484	68832	64	1	P04004
VLLATLSIPITPER	2.7	269010	500350	154790	167890	3.23	2	Q14152
EVGSIIGK	5	219700	15720	336650	131680	25.11	1	Q15365
QVEVELLSR	3.5	479460	70042	1193500	309130	17.04	1	Q96G23
TVLDPVTGDLSDTR	4	548590	151370	1657600	56893	29.14	1	Q15393
SLQDIIAILGM(+15.99)DELSEEDKLTVSR	3.7	254270	857430	50891	98466	64	1	P06576
HLTDAYFKK	8.7	548960	19126	1097100	44313	57.36	2	Q02878
EYSLQVLK	8.6	250000	0	206500	551320	64	1	P34897
AFLASPEYVNLPINGNGK	4.6	177600	308030	196840	171570	9.08	1	P09211
LPQLPITNFSR	2.6	985780	895170	1293100	1195900	2.31	1	P21333
EAGAGGLAIAVEGPSK	2.3	323550	88625	856510	128450	9.66	1	P21333
AAIDWFDGK	2	255110	0	162270	102050	64	1	P35637
MKEIAEAYLGK	2.7	1404100	46159	1709800	876800	64	2	P11142
ALYEAGER	3.6	317970	13861	298620	73371	63.92	1	P04083
ADKDQANDGLSSALLILYLDSAR	3.2	192310	521340	77408	155680	35.24	1	A0FGR8
SLADELALVDVLEDK	1.5	1251700	4184800	542770	158090	34.59	2	P07195
VLGTAFDPFLGGK	2.6	70792	48104	51008	73359	2.3	1	Q92598
VIHLSNLPHSGYSDSAVLK	3	1068800	464460	394810	417370	7.6	3	P43243
LWDHATMTEVK	7.4	573900	264500	593280	1371800	20.78	1	Q9Y3F4
GGKPGLTIQAPQLEVSVPSANIEGLEGK	1.7	600030	1648200	222620	73904	22.3	1	Q09666
DLLDDLKSELTGKFEK	1.6	504170	938040	184830	218860	5.08	2	P08758
LKTEGSDLC(+57.02)DR	5.3	291560	2707.3	79005	51255	64	2	P04843
WGTDEEKFITIFGTR	2.3	1248700	2083900	465520	1661500	4.48	2	P08758
FAALITVLALAEK	13.6	28381	53800	0	0	64	1	Q9H583
LREQLQLLEEQHR	2.8	281620	120910	260520	46369	15.07	1	Q15149
TNRPPLSLSR	5.7	2134300	31327	1133500	983870	64	2	Q07020
HVDAHATLNDGVVVQVMGLLSNNNQALR	2.2	508800	647630	89368	819610	9.17	2	Q13283
GLVM(+15.99)VKPGSIKPHQK	4	7046.2	3812.6	0	24372	64	1	P49411
VAASVLNPYVK	1.8	367890	27064	565920	120210	28.02	1	P48047
DVYTGDALR	12	65728	0	153240	41781	64	1	P20618
ESETTTSLVLER	3.5	487660	19474	509960	131980	64	1	Q04837
LIALLEVLSQKK	3.1	338120	395410	0	781780	64	2	P21333
LKEGDTIIVPGVEGPIVTQIR	1.8	295720	272440	49167	89316	15.7	1	O60841
IQELEDLLAK	2	291470	43228	227850	139570	17.47	1	P20700
M(+15.99)(+42.01)LGPEGGEGFVVK	8.8	137490	159400	92095	180780	1.96	1	P52597
NLTWTLSNLC(+57.02)R	8.8	137490	159400	92095	180780	1.96	1	P52292
NYSPYYNTIDDLKDQIVDLTVGNNK	1.5	6290700	20181000	2871700	1711600	50.63	2	P35527
RLEIEHSVPK	7.4	330870	37451	810560	368800	21.64	1	Q9NZI8
TVLELQYVLDK	2.2	95972	84296	54990	32730	6.47	1	Q14444
KTFSHELSDFGLESTAGEIPVVAIR	4.8	1325700	2881700	700680	491360	5.86	2	P30101
GPESESEDHRASGEVR	3.7	62566	38620	83812	83011	2.17	1	P78527
IEPSVNFLK	9.5	145710	29832	86642	229540	7.94	1	Q12907
LMVALAK	2.5	948910	15358	1298200	426830	64	1	P07355
SPLLQLPHIEEDNLR	7.9	148190	212420	156770	65406	3.25	1	Q9UGP8
ASLPTLGFTHFQPAQLTTVGK	1.4	148810	245160	31068	234800	7.89	1	P30566
SFVLNLGK	2.5	981780	80118	1274300	760750	22.62	1	P09382
LSDQFHDILIR	2.3	453680	132740	415900	176860	8.21	2	O75340
LLQDFFNGK	1.9	1472000	237220	1348700	2785500	11.74	1	P11142
ALTNLPHTDFTLC(+57.02)K	1.9	116360	73408	133260	112530	1.99	1	Q9UBQ5
HLTYENVER	11.8	131850	9729.4	79944	23169	42.61	1	P62491
FHNELNAHIK	16.8	32857	31470	16091	59328	3.69	1	P12270
VDIDAPDVDVHGPDWHLK	2.7	881280	837400	643940	260950	6.83	3	Q09666
ALLANALTSALR	2.5	406330	193420	75919	492880	11.37	1	P57088
EAFSLFDKDGDGTITTK	5.7	1167600	357210	812990	279480	11.52	2	P0DP24
TGHLEEVVLALLK	2.2	68687	64450	3446.3	79280	37.02	1	P04083
LLEAFHNQGPVIK	1.8	127600	35372	270180	163570	7.64	1	Q9Y2R9
FGPIPLGSLGWK	2.9	139000	43890	23348	164430	13.89	1	Q16795
HVFGESDELIGQK	2.4	858290	78693	2569500	429290	32.65	2	P60174
STGEAFVQFASQEIAEK	2.5	3054900	2750600	1893700	671780	10.28	2	P31943
STTTIGLVQALGAHLYQNVFAC(+57.02)VR	1.5	115110	242250	71181	125840	11.44	1	P11586
GFGFVLFK	1.8	1311500	199080	461540	3654100	18.35	1	Q14103
IVLAAAGGVSHDELLDLAK	3.6	295520	449610	148600	318600	3.03	2	O75439
IEVIEIMTDR	1.9	2666700	152010	1465200	789720	54.34	1	P09651
QQEVETELK	4	77966	41402	64618	49767	3.77	1	P08621
GRPVSLWELLFSEAISSEQR	7.9	155780	455240	60934	18678	24.37	1	P58107
ELISNASDALDKIR	4.4	1619100	808570	2711100	1916100	3.35	2	P08238
EWLIEVPGNADPLEDQFAK	4.6	112280	147370	64301	80205	2.45	1	Q15050
TKTPGPGAQSALR	1.5	328250	0	152840	85506	64	2	P62263
AITSAYYR	6.7	116500	20173	185060	73368	9.29	1	P62491
LSDLLAPISEQIK	2.4	272860	253700	242200	163660	2.64	1	Q01518
VPSFAAGR	8.9	423740	44704	676390	851420	19.05	1	O00425
NHMDITTPPLPPVAPEVLR	3.1	862980	1976900	687750	558160	8.63	2	Q9NZB2
IGGVQQDTILAEGLHFR	3.1	1127200	498820	231230	213650	16.69	2	Q99623
FAAEHTIFASNTSSLQITSIANATTR	2	297770	728640	133450	95831	7.6	1	Q16836
LNTNVAK	8.9	36498	0	20253	56825	64	1	P05186
TIPWLEDRVPQK	2.9	400610	208070	816580	216150	3.92	2	O43707
ITVVGVGQVGMAC(+57.02)AISILGK	0.8	4123600	8474400	1820700	5958700	35.23	2	P07195
LTAASVGVQGSGWGWLGFNK	4.4	876480	1668600	546590	1018200	6.12	2	P04179
FQTMEEK	2.4	381610	0	166460	29456	64	1	P39023
QKLDPAASVTGSK	13.2	23815	0	22816	0	64	1	P46013
FDLMYAK	2.5	858320	28657	1164800	889620	47.12	1	Q71U36
ADSAVSQEQLR	10.5	107230	0	222530	26216	64	1	Q9UKS6
VAPVPLYNSFHDVYK	3.4	516230	877280	778140	136990	6.4	2	Q16719
YKAEDEVQR	1.7	142630	0	287710	32894	64	2	P0DMV8
LQAEVLEC(+57.02)VSLVELTSLK	4.4	199860	618520	89076	55593	17.06	2	P07741
SQYEQLAEQNR	7.1	190600	9307.7	660400	77567	64	1	P13645
LAATNALLNSLEFTK	1.5	898500	1397000	592030	490860	2.85	1	Q14974
A(+42.01)QWNQLQQLDTR	9.3	218540	227850	251030	285820	2.61	1	P40763
RDELLAQHAAGALGLPDLVAVLTR	6.3	668310	474280	338140	751800	3.28	2	P58107
LPDIFEAQIAGLR	2.2	3664600	7874600	2763600	460370	17.1	2	P08729
KPLTSSSAAPQRPISTQR	1.1	287510	10834	109110	1030100	64	2	Q15691
RIQEIIEQLDVTTSEYEKEK	2.7	1242600	1845000	382060	106750	24.7	2	P10809
TSEIYVHR	7.6	56747	0	75408	15942	64	2	Q9GZR7
TAGINVR	6.5	77654	3851.5	146430	51326	38.02	1	P50991
LVSESSDVLPK	1.9	6402700	3639.6	7009200	1528700	64	1	P05787
LIVENLSSR	14.5	2591800	10471	4965200	3212500	64	1	Q13247
QIALAVLSTELAVR	2.2	68323	115420	24610	37406	4.69	1	P27708
GSSSGGGYSSGSSSYGSGGR	4.7	172030	46622	595810	36070	62.02	1	P35908
LFYLALPPTVYEAVTK	5.8	423220	1157100	204700	88701	13.05	2	P11413
DLDFTIDLDFK	2.2	60343	197280	14190	29902	64	1	Q99873
APGQLALFSVSDK	3.6	505240	544160	167640	1232900	16.16	1	P31939
SINTEVVAC(+57.02)SVDSQFTHLAWINTPR	4.7	346640	941940	178690	230960	26.95	1	Q13162
HLREYQDLLNVK	2.8	116510	0	164650	52045	64	1	P08670
KEAESC(+57.02)DC(+57.02)LQGFQLTHSLGGGTGSGMGTLLISK	3.7	1361400	3019500	503170	1754500	17.93	2	P07437
VLATQPGPGR	1.8	122740	0	216220	40698	64	1	Q5JTH9
EGPYDVVVLPGGNLGAQNLSESAAVK	1.9	2781500	7873000	2104500	486760	16.17	2	Q99497
VDPEIQNVK	4.9	495830	27660	1784800	67050	64	1	P35908
DDPSKPVHLTAFLGYK	1.9	698320	130110	141490	272600	17.29	1	P39023
TTAAFQQGK	7.3	49257	5658.1	35423	141180	24.95	1	P09234
M(+15.99)(+42.01)ELQPPEASIAVVSIPR	6.2	134660	375910	42293	119280	64	2	P08195
VAASTFSSDSKK	9.2	17181	0	0	24428	64	1	Q9Y5J1
HSAESQILK	0.5	17035	15124	31732	21282	64	1	P40261
A(+42.01)DVLDLHEAGGEDFAMDEDGDESIHK	1.4	467040	349030	249660	41971	29.25	1	Q9Y5S9
VHELNEEIGK	5.6	319780	1186	718260	56210	64	2	Q9Y383
WHPYTNTAR	10.4	117460	35803	78016	312700	8.73	1	Q96G21
GMVSAYPR	5.8	339310	53513	891750	300060	16.66	1	P33991
VLQSALAAIR	2.5	520990	27711	254250	353000	52.29	1	Q12905
DDEVQVVR	8.9	423040	0	163500	34933	64	1	P61254
IKPVLMMNK	11.2	1233900	22095	1335500	2689400	64	2	P13639
QSSGASSSSFSSSR	6.8	60071	5455.4	105690	22087	19.62	1	O00571
ADC(+57.02)TITMADSDFLALMTGK	0	38798	125970	29218	0	64	1	P22307
ILTDIMWPIIAK	2	58647	62962	17732	58579	5.38	1	Q13057
SILTQPHLYSPVLISQLVQMASQLR	14.5	41205	0	0	74929	64	1	O15027
AYQIDTVINLNVPFEVIK	9.5	155730	558930	47745	0	64	2	Q9UIJ7
TEGLSVLSQAMAVIK	0.7	307350	0	0	303150	64	1	P05198
FIMESGAK	12.7	162600	0	128920	22706	64	1	P23396
LTNSMMMHGR	1.5	822140	0	98980	222560	64	2	P46782
TVEQTATTTNK	11.1	68838	0	27511	53188	64	1	P08579
FAQHGTFEYEYSQR	3	1121100	114300	709860	226990	30.04	2	P23246
LVQIEYALAAVAGGAPSVGIK	3	762300	2092600	383030	234440	8.93	2	P25787
GLMYPYIFHVLTK	7	35229	49786	0	67311	64	1	Q9NZB2
LKPGYLEATVDWFR	1.8	386000	408180	124240	831480	6.69	2	Q15181
GTITIQDTGIGMTQEELVSNLGTIAR	3.7	424090	1091000	208940	154410	7.07	2	Q12931
ALKEENIQTLLINPNIATVQTSQGLADK	0.8	117850	129370	0	0	64	1	P27708
SGGSGGC(+57.02)SGAGGASNC(+57.02)GTGSGR	7	9009.1	12919	3749.1	19368	64	1	Q15005
LSQTSNVDKEEEAVTIEMNEPVQLTFALR	0.9	1243000	3935700	634920	303580	40.17	1	P12004
SAAQAAAQTNSNAAGK	2.9	256610	2025.1	283070	44802	64	1	Q8NC51
GNFNYIEFTR	2.1	339540	272820	753410	193110	5.43	1	P19105
EVPC(+57.02)TVTSASPLEEATLSELK	6.7	380350	701620	315950	364240	5.03	2	P48047
GSGSQSSVPSVDQFTGVGIR	9.9	603560	1573600	542170	170490	12.29	1	Q9UQE7
STGGAPTFNVTVTK	2.3	4944000	554580	13934000	2616300	25.13	1	P07737
LITPAVVSER	2.3	2114300	54381	1123200	521150	64	1	P62851
FMVHPAISSINLTTALGSLANIAR	1.6	142570	330200	29821	108830	11.07	1	Q92797
VGEVIVTKDDAMLLK	2.6	3100300	573540	3128200	417180	19.85	2	P10809
GILTVDELLAIR	6.8	212190	136010	23164	662910	28.62	1	P13473
YASIC(+57.02)QQNGIVPIVEPEILPDGDHDLK	1.8	299350	903880	171020	122480	64	1	P04075
LVINSGNGAVEDR	4	215340	7406.7	372260	64653	56.3	1	P16070
GGSGGSYGGGGSGGGYGGGSGSR	8.8	469910	20031	1448900	279290	64	2	P35527
LAYIAHPK	3.3	926940	10734	414570	248540	64	2	P47914
DKQMELLENK	2.9	71473	0	140540	36761	64	1	Q9BUP3
YKPLDLRPK	6.2	1431700	11333	382230	858800	64	2	P42766
KTANDMIHAENMR	6.7	147240	0	140740	52438	64	2	P26038
ETVTILPGASFFSSDESFAMIR	2.2	234960	570420	74098	63557	8.97	2	P55809
AIWNVINWENVTER	2	993260	2387600	739030	339830	7.03	2	P04179
EVSTYIKK	10.9	830610	4832.2	864060	46671	64	2	P68104
FYEQFSK	3.1	782790	12181	1010000	520970	64	1	P07900
IAAYAYSALSQIR	10.4	261400	220130	654940	54721	11.97	1	Q6IAA8
SNLMDAISFVLGEK	5.5	2275900	6036700	1547000	1382200	43.85	2	Q14683
NLAEALLTYETLDAK	2.8	297060	679280	351470	87585	9.71	1	Q96TA2
YAELLVSQGVVNQPEYEEEISKYDK	2.4	155000	328260	61335	0	64	1	Q02218
MIKPFFHSLSEK	2.4	4553600	510730	3384900	11719000	22.95	3	P10599
LWDLTTGTTTR	3	792710	98382	664380	626970	18.1	1	P63244
LAQHITYVHQHSR	6.8	353380	43015	935510	114190	21.75	4	P33993
LESGMQNMSIHTK	2.6	3002400	13184	2967500	1056400	64	2	P05787
YSVQTADHR	1.9	86965	0	214850	44107	64	2	Q16658
LTRDETNYGIPQR	10.2	404250	27059	342150	176740	39.58	2	P63244
VAHALAEGLGVIAC(+57.02)IGEK	4.5	3306700	8548500	2848700	1814100	64	2	P60174
HVQGILR	3.6	354350	6198.2	296990	219090	64	1	P62308
EFTEAVEAK	8.2	541870	18466	1388500	127670	64	1	P35232
FC(+57.02)TGLTQIETLFK	1.1	637670	1490300	315070	745310	64	1	P12277
A(+42.01)EVQVLVLDGR	2	899720	337370	308790	181150	15.3	1	P40429
MGPSGGEGMEPERR	0.9	30298	0	0	22603	64	1	Q14847
RPLEQQQPHHIPTSAPVYQQPQQQPVAQSYGGYKEPAAPVSIQR	3.3	202260	353110	0	82290	64	1	Q14847
DGPGFYTTR	11.7	102830	33230	89516	45039	7.33	1	P40939
DSGSFVAFQNIPGSELMSSFAK	2.3	37318	79774	17721	20337	4.5	1	P42166
EGNDLYHEMIESGVINLK	1.7	759620	1398000	528760	209720	6.67	2	P06576
LGPNDQYK	4.2	125790	0	25230	43530	64	1	O00483
LDAGDADPR	16.7	32174	0	80578	17737	64	1	Q8IVT2
AHGGYSVFAGVGER	3	827640	136100	1546000	329640	11.36	2	P06576
YGEQGLR	13.3	81159	0	67915	180160	64	1	O60884
DIILQSNPLLEAFGNAK	2.1	98944	142410	25938	26062	7.76	1	Q12965
MQAVQEATR	6.5	208340	55465	240630	263640	4.93	1	Q15149
HGIPTAQWK	2.1	100270	0	91830	104000	64	1	P22102
RNEIDAEPPAKR	5.7	528310	50896	1084500	288140	21.31	3	Q8TDN6
HLVYESDQNKDGK	4.5	252620	14448	280020	85526	43.64	2	O43852
HYGPGWVSMANAGK	6.1	949680	46580	833790	654540	48.6	2	P23284
HGLEVSEMAVSELPGNPNAVWTVR	1.6	255410	239500	75948	116770	7.76	1	Q15393
APVNTAELTDLLIQQNHIGSVIK	2	314660	791390	101260	81478	9.71	1	Q9P287
GYNVNDEK	1	53758	0	204800	10228	64	1	P80723
SNNSETSSVAQSGSESK	0.3	6645.9	4850.6	0	0	64	1	P49792
S(+42.01)ETAPAAPAAAPPAEK	2	3600800	175850	1353600	289790	64	1	P16403
VYINYYDMNAANVGWNNSTFA	2.4	334100	1009700	100710	184850	24.56	1	P14174
SYSPYDMLESIR	2.1	2448200	2812700	2783700	1317400	2.19	1	P07355
EFVEAVLELR	2.1	352900	682900	253840	76643	8.91	1	O75367
EPLFGISTGNLITGLAAGAK	2.4	1012800	2112500	332100	551520	6.36	2	P31327
ESYSIYVYK	2.7	7344400	150360	2522300	939300	64	1	P06899
AGGPGLER	13.1	189660	0	658310	50402	64	1	P21333
KEDYYQILGVPR	8.5	1756000	2575100	2418300	1619500	6.26	2	Q96EY1
AVAPSIIFFDELDALAVER	14	106690	331350	47745	25363	14.87	2	Q8NB90
TLGDQLSLLLGAR	0.5	24930	83322	16400	0	64	1	Q9UBG0
GLDVPQVSLIINYDLPNNR	2	308030	728120	113140	149980	6.44	2	P38919
YGVSGYPTLK	2.9	699340	58774	1300100	371620	22.12	1	P30101
FLNGLEILLAK	9.8	342640	773880	128700	431830	21.42	1	Q9NU22
KFLDGIYVSEK	4.2	530890	86158	320780	223440	17.33	2	P32969
LADDVDLEQVANETHGHVGADLAALC(+57.02)SEAALQAIR	0.6	960010	3279800	382320	177930	64	2	P55072
TNSTFNQVVLK	2.3	972920	12471	561340	468880	64	1	Q07020
VDLMAHMASKE	3.1	213820	12680	466510	123340	36.79	1	P04406
MQHLNPDPQLIPEQITTDITPEC(+57.02)LVSPR	4.7	29853	98035	21375	0	64	1	Q96AC1
ISGLIYEETR	2.5	43685000	306030	12377000	4273000	64	1	P62805
EM(+15.99)GTPDVR	7.3	48064	0	89832	13457	64	1	P62899
LALVTGGEIASTFDHPELVK	1.8	1027000	1976900	687750	558160	3.54	2	P78371
TAAYGHFGR	2.3	72137	0	97513	52708	64	2	P31153
VTQNLPMK	5.7	18291	2671.1	37179	24990	13.92	1	Q1KMD3
EFQQYLPVVMGPLMK	6	314110	722770	151260	221200	4.78	2	O00410
MEYDGILIAGGPGNPALAEPLIQNVR	1.9	1240600	1287000	284660	302410	10.85	2	P31327
AGGAGVPAFYTPTGYGTLVQEGGSPIKYNK	2.1	202380	506080	189340	0	64	1	P55809
APDFVFYAPR	2.2	731270	402310	1121800	324240	3.46	1	P26038
PLIPIVVEQTGR	3	82666	53346	70742	59941	2.75	1	Q16740
LVPGGGATEIELAK	2.4	416130	54056	718950	373890	13.3	1	P50990
NIEEHASADVEK	4.3	147340	0	187100	61549	64	2	P61006
GNFQTIGLSAAAR	3.8	411240	145690	242660	88292	13.23	1	P05187
SQESGYYDR	10.7	36004	14386	64540	18524	4.49	1	P43243
ASLEGNLAETENR	3.2	1347000	99612	4293400	87901	48.84	1	Q04695
GQLEALQVDGGRLEAELR	8.4	753690	366500	219140	1978100	9.03	1	P08729
MLAVDAVIAELKK	1.6	237340	355740	82906	87023	5.11	2	P10809
NLVTEDVMR	9.1	394240	89852	992020	130630	11.04	1	P06744
EAWEEEQEVAELLKEEFPAWYEK	8.5	192010	534020	123470	71961	13.84	1	Q9UIG0
IINEPTAAAIAYGLDKR	2.3	4160000	2868600	2431300	956720	10.85	2	P11021
MPEFYNR	2	238200	0	141890	377330	64	1	P00966
TSAC(+57.02)FEPSLDYMVTK	4.6	310940	129000	420300	304210	3.26	1	P31327
VSDTVVEPYNATLSVHQLVENTDETYC(+57.02)IDNEALYDIC(+57.02)FR	3.6	241370	730060	0	235420	64	1	P07437
VLPSITTEILK	2.1	687930	237200	432280	300500	7.51	1	P35232
LIGQIVSSITASLR	7.3	211690	344210	84257	366970	7.15	2	Q71U36
LGFHLPLEVAYQR	4.1	622980	987150	254320	219340	4.7	2	Q15149
TYTEHAK	2.5	468000	0	99902	15331	64	1	P62805
TVAEVQETLAEMIR	9.6	1194600	3976200	296230	449360	64	1	Q8TEQ6
IYDALDVSLIER	2.7	100370	155960	79786	59183	2.64	1	P54136
AVLVDLEPGTM(+15.99)DSVR	2.3	566700	1084800	872390	81431	13.32	1	P68371
DGSIDLVINLPNNNTK	5.5	881910	1414700	527630	250580	5.65	2	P31327
IEYAKPTR	1.9	347940	0	266100	68283	64	2	P14866
A(+42.01)DDIDIEAMLEAPYK	2.9	43356	75838	13905	9981.4	7.6	1	Q14498
ILDDDTIITTLENLKR	1.7	235050	340130	64074	57759	8.28	1	Q14204
STFVLDEFKR	2.4	876420	171030	1485600	648440	8.69	2	P26641
GLVAVITGGASGLGLATAER	2.3	1103100	1617100	477080	1301500	3.39	2	Q99714
LVLLELNFLPTTGTK	2.6	200800	430440	62400	288400	19.61	1	P48556
APKPDGPGGGPGGSHM(+15.99)GGNYGDDR	4.8	40645	24123	0	0	64	2	P35637
LAPITSDPTEATAVGAVEASFK	2.1	2227500	3058000	2584700	1524200	2.01	2	P14618
AC(+57.02)LISLGYDIGNDPQGEAEFAR	1.6	316400	944330	221880	99386	64	2	P12814
VLVNDAQK	2.1	76724	0	105490	27350	64	1	Q13263
LGDSHDLQR	17.5	39893	15862	74136	0	64	2	Q13813
KYELGRPAANTK	1.4	356100	0	176090	149140	64	2	P62241
LIHFSGVALGEAC(+57.02)TIVLR	1.5	140080	193240	32982	121580	6.44	1	P78371
DATNVGDEGGFAPNILENK	3.9	4634700	9475900	6284600	1417700	6.96	2	P06733
RVPFSLLR	3.5	1334000	206350	813390	1453300	13.87	2	P04792
EGPAVVGQFIQDVK	3.5	73633	41495	52909	67274	3.2	1	Q86VP6
IMGTSPLQIDR	9.2	884940	70353	1062700	271670	30.35	1	P31327
ITMPVIFNEPLSFLQR	7.3	34011	36845	10327	85439	24.89	1	Q9BXW6
MSFIAPNLSIIIGASTAAK	7.3	34011	36845	10327	85439	24.89	1	Q8WWY3
AVTEQGHELSNEER	2.8	381100	12575	918060	63838	64	2	P31946
FVFSLVDAMNGK	1.8	527120	367580	394460	926970	2.52	1	P40926
KAQQELEEQTRR	2.1	111750	1905.9	251810	0	64	2	P26038
FGVPIIADGGIQTVGHVVK	3.5	198310	341900	71871	328940	6.77	1	P20839
S(+42.01)AADEVDGLGVARPHYGSVLDNER	2.1	386650	766170	400640	86268	8.88	1	P46940
LYLINSPVVR	1.9	112130	28010	132750	130950	5.6	1	P41252
KGSELWLGVDALGLNIYEQNDR	3.4	44444	69317	5028.5	86800	17.26	1	P26038
GTQGAEEVLR	10.1	394370	21443	754900	514780	35.2	1	Q15149
KLELDILPLQEANAELSEK	9.3	55571	0	47625	41728	64	1	P12270
EALLSSAVDHGSDEVK	2.2	336840	38794	722000	104250	18.61	2	P78371
MKEIAEAYLGYPVTNAVITVPAYFNDSQR	1.3	1088700	959120	153590	505490	17.82	2	P0DMV8
VADNLAIQLAAVTEDKYEILQSVDDAAIVIK	9	393160	306040	158240	799930	5.06	2	Q12906
EQEVNILKK	6.4	65075	0	132370	108080	64	1	P35579
AQAAAPASVPAQAPK	3.3	2164200	22652	1022000	386230	64	1	P47914
EIVHIQAGQC(+57.02)GNQIGAK	3.7	1374000	227280	2746700	2422600	27.65	2	P07437
MFGIDRDAIAQAVR	2.4	1178400	1113600	2042700	334950	6.1	2	P29401
GVTNDQVDPSVDVLK	9.4	94891	28151	117160	82100	5.4	1	Q9Y2P8
HLPNDPMFK	3.6	210260	0	259650	85351	64	1	O75390
SDVWSFGILQTELVTK	8	165770	339730	150480	114410	5.81	1	P07947
MSSFGDFVALSDVC(+57.02)DVPTAK	1.2	211210	524370	248470	71986	64	1	P31939
LTLDKLDVK	2.3	1191300	71830	2027100	1574500	28.22	2	P00558
AEASSGDHPTDTEM(+15.99)KEEQK	5.5	6487.1	0	18773	0	64	2	Q02790
FGAVWTGDNTAEWDHLK	1.8	175160	178790	60082	139030	5.37	1	Q14697
YHVPVVVVPEGSASDTHEQAILR	3.4	552840	437210	194950	5781.7	64	2	P04844
TASFSESR	10.2	36914	0	108030	27853	64	1	P53396
HHPQVLSMK	1	39459	0	95061	27786	64	1	P31939
NVTAIQGPGGK	7.8	112230	27660	134010	183430	6.63	1	P50213
YGEPGEVFINK	2.6	859480	26104	479050	171700	64	1	P23246
THETGTTNTATTSNAGSAQR	0.2	30265	7442.5	110220	0	64	1	P51610
KGTVEGFEPADNK	2.4	487730	1408.3	1192600	25506	64	2	P37108
NDLAVVDVR	2.2	1225200	21838	1265100	231710	64	1	P19338
GGGGFGAGPGPGGLQSGQTIALPAQGLIEFR	11.2	347230	120000	490220	534260	4.45	1	Q96QR8
GLVGEIIKR	2.7	528400	182280	1046000	480870	5.74	2	P22392
VGIDTPDIDIHGPEGK	6.8	105660	42752	89431	68208	5.2	1	Q09666
GLDVDSLVIEHIQVNK	1.6	3922500	3561600	952390	799280	12.98	2	P18621
YYIQNGIQSFMQNYSSIDVLLHQSR	2.6	149510	312930	62228	34470	9.08	1	P78527
M(+42.01)DTGVIEGGLNVTLTIR	1.3	219920	506860	115380	257440	64	1	Q15366
ELYLFDVLR	1.7	38043	78128	18476	18803	4.23	1	P08243
VDATEESDLAQQYGVR	2.4	1230800	407400	2528100	131200	19.27	2	P07237
LEGGSGGDSEVQR	7.9	50923	0	72890	5287.5	64	1	P62195
DVEQQFK	11	71699	0	171110	65662	64	1	Q14566
EIIQDVTLHDLDVANARPQGGQDILSMMGQLMKPK	5.4	98210	0	0	47733	64	1	Q9Y265
MFGGPGTASRPSSSR	3.7	360990	9563.3	336480	238530	64	1	P08670
YASIC(+57.02)QQNGIVPIVEPEILPDGDHDLKR	5.3	2922000	8951300	1485800	1232200	64	2	P04075
VMEKPSPLLVGR	8.2	155360	316940	113260	40203	7.88	1	Q13283
VTAEVVLAHLGGGSTSR	2.7	724870	193530	364460	289420	10.6	2	P04843
MHIAALASAILSDPENNIKK	4.9	71490	38153	122820	56789	3.22	1	Q8WTT2
QFSQYIK	3.5	823920	12951	829590	374480	64	1	P46777
LGFAGLVQEISFGTTK	5.8	1366400	2758900	638700	1268200	4.32	2	P48643
HALIIYDDLSK	3	548660	84587	799730	191850	13.22	1	P25705
TAAENEFVVLK	2.2	204380	67074	322220	87568	5.08	1	P08729
VANVELYYR	4.5	149230	18989	205390	131650	12.68	1	Q00610
LAENSASSDDLLVAEVGISDYGDKLNMELSEK	0.8	578050	1846500	329410	45412	40.66	1	P30040
THLASDDLYK	14.4	121020	10429	187380	14019	26.1	1	Q9H7B2
VWINTSDIILVGLR	2.9	321610	219320	49453	326970	13.97	1	P47813
AEGYAEGDLTLYHR	5.7	1675300	641170	4465000	1133800	9.68	2	Q8IY81
LIDIFYPGDQQSVTFGTK	1.8	206810	375900	11420	51026	34.06	1	P54886
DLEGSDIDTR	5.7	83487	0	125970	54946	64	1	P55060
S(+42.01)ETAPAAPAAAPPAEKAPVK	2.8	1511300	66625	723480	163640	64	2	P16403
LMIWDTR	2.6	224630	0	177960	165560	64	1	Q16576
LLEAQAC(+57.02)TGGIIHPTTGQK	3.4	132500	46615	401290	34560	11.61	1	P15924
AAAEIYEEFLAAFEGSDGNK	5.5	475060	1608700	194130	41852	38.44	2	O15042
DLMAHMASKE	2.1	364730	8482.2	827730	217570	64	1	P04406
AVEILADIIQNSTLGEAEIERER	0.6	54483	206790	0	11137	64	1	O75439
EGVHGGLINKK	4	489950	14480	1815500	128420	64	2	P07737
GNAIYNLLPDIISR	1.7	97382	231970	47322	55946	4.9	1	Q15021
APQALASILQGHLPPSALLTMLR	19.2	152330	578070	0	0	64	1	Q86YV9
MREHLELFWSR	8.4	281310	205090	314290	113380	4.34	1	Q00610
LLEQYKEESKK	2	1018900	3196.5	593850	182390	64	3	Q00839
ENLESWLNYLKK	1.7	1194200	1761800	1501400	1153200	4.89	2	Q9BVP2
GVIINTASVAAFEGQVGQAAYSASK	2	861710	1350700	428820	339020	3.98	2	Q99714
IAEVDASVVR	2.1	171630	0	282900	41234	64	1	P31930
PGYGHAVLR	9.9	52231	0	26185	51539	64	1	O75390
NQQPASFMR	7.2	147080	0	195140	357070	64	1	Q0P6D6
PPYTVVYFPVR	3.5	1689600	2184500	1602200	2924300	61.48	1	P09211
LADALQELR	2.1	1018000	0	1016900	415260	64	1	P02545
LTDADAMK	9.9	99770	0	124760	98742	64	1	P25705
KGDLSPAELMMLTIGDVIK	6.7	210180	618520	89076	55593	11.13	2	Q9H9T3
ILAIGLINEALDEGDAQK	3.1	634890	1568900	324420	244460	6.42	2	P46940
IANPVEGSSGR	3.7	322120	3330.8	411730	131060	64	1	Q15365
AIDDNMSLDEIEK	4	608440	463200	148940	211270	10.81	1	P31327
YWLYYLHPVLQR	10.9	120910	33605	0	402510	64	1	P15291
INFDKYHPGYFGK	3	1489100	237410	216630	853930	21.46	3	P46776
AGLQVYNK	3.5	601590	9161	1060300	126540	64	1	P13987
TTGHLIYK	2.4	86419	1866.9	97994	116100	64	1	P68104
AVENYLIQMAR	1.7	135160	11855	287500	87417	24.25	1	O14737
KISSDLDGHPVPK	7.6	44755	0	83064	79624	64	2	P29401
QAVSMFLGAVEEAKK	13.9	109000	77243	99710	214190	4.78	1	P49419
NVQFVFDAVTDVIIK	2.8	384140	727270	87910	229380	8.27	2	P08754
TVDNFVALATGEK	2	1676400	445650	1910400	474120	8.7	1	P23284
FNFLNPNDPYHAYYR	2.5	107390	204020	0	98644	64	1	Q15459
FMLQDVLDLR	2.1	124290	181570	40496	89609	4.58	1	Q04637
KFQPLFGDFAAEK	2.3	338940	283860	447860	304410	1.58	2	Q15050
A(+42.01)TAEVLNIGKK	12.9	436630	74913	999540	185900	13.34	1	P22234
TEGNIDDSLIGGNASAEGPEGEGTESTVITGVDIVMNHHLQETSFTK	1.6	2226500	6321800	857760	192000	32.93	1	P13693
NLEPEWAAAASEVK	2.5	385230	46872	247480	88696	24.7	1	Q15084
SQEQLAAELAEYTAK	4	491480	662000	782910	133170	5.88	2	P15311
LGDDIDLIVR	3.4	226120	108430	386950	239670	3.57	1	O15371
VADIGLAAWGR	3.4	226120	108430	386950	239670	3.57	1	P23526
EYQELMSVK	2.1	775000	0	1318600	94110	64	1	P08729
EEEDKKEDVGTVVGIDLGTTYSC(+57.02)VGVFK	2.6	1405900	4214200	613970	598740	21.43	2	P11021
RLVEVDSSR	16	177620	11083	100430	57234	48.88	1	Q03252
M(+42.01)DFENLFSKPPNPALGK	2.3	323010	820530	200180	168540	7.98	2	Q8N5P1
QSVFPFESGKPFK	2.1	569750	283860	447860	304410	4.38	2	P17931
RILPKPTR	1.8	67146	0	50550	175050	64	2	P62081
FISDKDASIVGFFDDSFSEAHSEFLK	1.3	1060800	1110400	132030	392840	19.75	2	P30101
RVEEDIQQQK	1.9	16257	0	10404	44738	64	1	P15924
MLLPNILLTGTPGVGK	2.2	67446	98041	29091	76492	3.37	2	Q9Y3D8
AAREELLAEFGSGTLDLPALTR	5.7	278450	657330	88771	97741	7.4	1	P58107
MFLGDNAHLSIINEYLSQSYQK	2.1	211500	363620	49160	178100	7.4	1	P46940
PAGDALLQMITIHLPSPVTAQK	4.8	35791	0	0	124240	64	1	P13639
MAIQTQQSK	3.4	140360	6346	302720	114530	47.7	1	O96008
YGSPGNVSK	3.6	27259	13861	16859	73371	14.84	1	O95373
YPYWPHQPIENL	9.6	3299500	11610000	1197100	216180	64	1	O75947
TVTNAVVTVPAYFNDSQR	2.3	3484100	2340300	3956500	2949200	2	2	P11142
IKFEMEQNLR	5.5	777720	239830	1616200	1078900	9.19	2	P35527
NSMMMHGR	18.9	34222	0	0	53767	64	1	P46782
LVNLQHLDLLNNK	2.5	914370	436690	220340	439160	11.62	2	Q96AG4
ELQPSEEVTWK	11.1	121750	0	104730	120460	64	1	O75438
VVVYSNTIQSIIAIIR	3.9	57915	148830	0	17810	64	2	P08754
MIVVLGEIGGTEEYK	2.6	260300	182420	187000	47462	13.15	1	P53396
EMQPTHPIR	3.2	558440	5546.3	1391900	285290	64	2	P63104
TPVLFDIYEIK	2.4	200460	119030	66768	56137	9.97	1	P50995
LSDGIGVMLPQVLK	8	857660	2749600	567940	27973	64	1	P52701
HDPQAEEALAK	3.9	69468	4697.1	120170	135050	28.75	1	Q8WVM7
ADLLLSTQPGREEGSPLELER	2.1	3545000	3792000	1649800	337030	24.93	2	P08195
LVEALC(+57.02)AEHQINLIK	5.5	1065600	1395000	1525500	1195400	10.4	2	P25398
LEDGTEFDSSLPQNQPFVFSLGTGQVIK	1.9	92242	326560	28818	0	64	1	P26885
FAQPGSFEYEYAMR	1.7	1789100	403340	618600	266640	22.01	1	Q15233
WAIAQLNYADMLK	5.5	1008500	1521700	1351700	1024600	11.18	1	Q14204
TKNFDKLSFLYLITGNLEK	7.4	57816	0	137240	94022	64	1	P53621
VLQLINDNTATALSYGVFR	6.2	257060	466850	66555	218990	7.01	2	Q9Y4L1
LGIHEDSTNRR	2.3	113970	0	218730	101050	64	2	P08238
YNFPNPNPFVEDDMDKNEIASVAYR	3.1	174950	196760	40855	45182	10.21	1	O15371
GIC(+57.02)EC(+57.02)GVC(+57.02)K	3	21649	0	74780	11815	64	1	P05556
EDAANNYAR	2.4	29169	0	57651	59025	64	1	Q71U36
VQQLVAK	11	29431	0	39460	26130	64	1	Q9Y679
ITSC(+57.02)IFQLLQEAGIK	3	434990	439560	43977	1248700	64	2	P22234
DTYIENEK	7.6	149800	0	55669	162220	64	1	P04843
IMLPWDPTGK	1.7	351520	0	112320	219150	64	1	P23396
SGLNQIPNRR	9.7	277430	23529	739220	273390	31.42	1	Q6P2Q9
HGKPTDSTPATWK	13.7	89071	0	43246	13657	64	1	O60832
ELTTEIDNNIEQISSYK	2.2	445880	660650	1048800	74106	64	1	P13645
VELDNMPLR	1.2	448210	0	262640	146910	64	1	Q15233
FALGIFAINEAVESGDVGK	4.7	790700	1801300	350830	720430	6.21	2	P46940
TLTLVDTGIGM(+15.99)TK	3.1	486900	618100	780350	459310	8.69	1	P08238
SAVEDEGLK	2.6	186700	0	204920	234310	64	1	P0DMV8
LTPTHGEMR	11.6	42033	0	8559	130520	64	1	Q8NE71
QVQSLTC(+57.02)EVDALKGTNESLER	3.2	1369900	2736300	2042800	664400	64	2	P08670
DQITAGNAAR	9.1	78736	0	255360	24013	64	1	P22234
ALAEIAKAELDDTPMR	3.8	240920	237590	241740	105220	3.6	2	P23246
TTLTAAITK	1.6	386190	0	418650	148970	64	1	P49411
VSQMAQYFEPLTLAAVGAASK	1.3	196300	537950	164310	25026	21.5	2	Q9Y490
LLPVLVHTFWIDTK	0.9	81796	0	0	221930	64	2	Q13505
LFYADHPFIFLVR	1.8	431740	591840	263580	540770	2.25	2	P50454
GLANPEPAPEPK	21.2	48648	0	106210	48655	64	1	O15027
IILPPEKELAMPGEDLKFNLILR	13	479700	1284900	241030	6447.9	64	2	P49411
LQQQQRPEDAEDGAEGGGK	4	104240	7143.2	57636	7721.6	48.22	2	Q08J23
DVPAYSQDTFK	2.4	273350	0	246310	57265	64	1	P04843
EGGLGPLNIPLLADVTR	1.7	876790	2934100	425430	74065	39.86	2	P32119
IIEPSLR	1.8	858760	10352	663620	183070	64	1	P62987
GFAFVQYVNER	2.3	1810500	155000	568000	695930	37.57	1	P07910
ASC(+57.02)LYGQLPK	2.9	586390	71968	1699600	561220	64	1	P09211
SLEIQKPAVAPR	2.7	36900	0	56016	61738	64	1	P48634
GFSLEELR	10.1	1107300	27277	422850	211090	64	1	P26373
EQGVLSFWR	2.2	2005500	82216	563700	1000400	64	1	P05141
LLGASELPIVTPALR	1.5	703710	767130	352140	188070	8.02	2	P52292
MEPSSLELPADT	2.3	162670	86405	410920	65062	6.32	1	Q16719
IQNGAQGIR	2.7	151920	458.27	227570	86352	64	1	P31943
VLEQLTGQTPVFSK	2.5	2592600	384060	1074800	930600	20.78	2	P62913
EQSQLTATQTR	9.2	68797	13350	38075	6983.2	31.04	1	Q6P2Q9
ELHGEGSSSGK	8.6	55360	16632	17423	91792	5.75	1	P61247
EVPAESVTVWIDPLDATQEYTEDLRK	0.8	143560	312930	62228	34470	9.08	1	Q9NX62
SAAAAAANRKR	2.4	1026400	8062.5	362190	185050	64	1	O43861
TAFDDAIAELDTLNEDSYK	2.1	57904	158280	33638	14329	11.05	1	P61981
SNLAYDIVQLPTGLTGIK	1.5	210720	252010	246640	200710	1.76	2	P34932
KGAAIPAK	10.2	40543	0	68236	73359	64	1	P19338
VLEDSDLKK	6.1	291010	25350	204410	66945	34.21	2	P11021
KGTDVNVFNTILTTR	2.9	597710	296140	280430	594840	4.35	2	P04083
VLDIIYQPQAIFR	8	35805	31700	8455.5	49115	6.38	1	Q9NVX2
DVDGAYMTK	3	526480	0	1754100	91375	64	1	P04264
SSYDVFQLEFNDGAYNIK	1.1	262270	573200	104960	218800	5.46	1	Q16658
GVQDIVVGEGTHFLIPWVQKPIIFDC(+57.02)R	10.9	111020	15133	0	120800	64	2	P35232
VLDNYLTSPLPEEVDETSAEDEGVSQR	1.5	615830	1433100	540790	231960	6.18	1	O00299
AVANETGAFFFLINGPEIMSK	4.2	553690	1306100	451110	0	64	2	P55072
DLFEDELVPLFEK	4.6	1514000	2139100	276290	161150	21.59	2	O60506
GLVLMSR	2.1	298480	0	355470	291190	64	1	P27824
AC(+57.02)ANPAAGSVILLENLR	8	2371700	4214500	2820000	2330600	34.59	2	P00558
ATVTKPVGGDK	2.8	106170	0	80310	34017	64	1	Q02878
C(+57.02)(+42.01)DKEFMWALK	1.9	76132	33753	134650	136130	64	1	P58546
QVSASELHTSGILGPETLR	2.9	159620	205560	138150	17824	15.54	1	P58107
LTTDPDLILEVLR	1.8	382200	161980	31055	1089000	35.07	1	Q71RC2
HIDFSLR	3.1	1700800	37385	664220	293560	64	1	P46781
GSAITGPVAK	8.7	568000	7674.8	311060	164470	64	1	P62829
TAVAHRPGAFK	6.5	86702	0	161460	74325	64	2	Q969H8
LLDTAFDLDVFK	2.4	147870	392810	93378	0	64	1	Q02218
AAPGAEFAPNKR	3.7	745820	65499	298690	110970	38.29	2	Q15233
C(+57.02)MPTFQFFK	1.3	882550	603990	1076700	1849500	64	1	P10599
TEAPAAPAAQETK	6.5	86358	0	221930	71571	64	1	P80723
NSNPALNDNLEK	3.9	424800	109770	455670	918200	8.36	1	O00299
LLNILMQLR	1.2	91508	0	0	256860	64	1	O60264
DAGIEPGPDTYLALLNAYAEKGDIDHVK	9.6	547910	452330	48357	819610	18.02	2	P42704
LVHSLFESIMSTQESSNPNNVLK	1.7	197680	459290	91187	210010	15.19	1	O15067
QTQIFTTYSDNQPGVLIQVYEGER	1.8	1552500	4081100	476600	485500	8.56	2	P0DMV8
LSGGLGAGSC(+57.02)R	19.2	67667	17765	44274	198700	20.01	1	Q04695
AAILPTSIFLTNK	12.4	275840	631600	25261	289870	25	1	O14744
DGTAGIPNLQLYDVK	2.5	699650	2008900	46188	308050	43.49	1	Q9BY44
DQQEAALVDMVNDGVEDLR	3.8	848480	2306400	889230	197430	64	2	P09211
[truncated: 29,158 more rows]

## Sheet: SP3-100cells-PG
Accession	Coverage (%)	#Peptides	#Unique	PTM	Sample 1 Area	Sample 2 Area	Sample 3 Area	Avg. Mass	Description
[truncated: 2,890 more rows]

[truncated: 5 more sheets: SP3-100cells-peptide, Ex-kit-1000cells-PG, Ex-kit-1000cells-peptide, Ex-kit-100cells-PG, Ex-kit-100cells-peptide]
